# Supplementary material for: Auxin exposure disrupts feeding behavior and fatty acid metabolism in adult Drosophila
Source: eLife. 2024 Jan 19;12:RP91953. doi: 10.7554/eLife.91953 (PMC10945601; doi:10.7554/eLife.91953)
Supplement: Figure 1—figure supplement 1—source data 1. [file elife-91953-fig1-figsupp1-data1.xlsx]

## Sheet: Sheet1
RNAi	PCR Transcript		Read 1	Read 2	Read 3	Ave Mean	Ave Bkgrd	Adj Mean	Std. Dev.
3.1Lsp2-Gal4[ts]	GFP		54228.9	54196.2	54150.5	54191.9		9841.55	39.4107
		Bkgrnd.	64036	64060.6	64003.6		64033.4		28.5889
0 mM Auxin	GFP		63246.8	63246.8	63246.8	63246.8		930.84	0
		Bkgrnd.	64180.5	64166.4	64186		64177.6		10.1047
1 mM Auxin	GFP		58290	58269.3	58259	58272.8		5749.5	15.7734
		Bkgrnd.	64022.3	64030.7	64013.7		64022.3		8.4976
2.5 mM Auxin	GFP		55964.1	55952.1	55952.9	55956.4		7904.66	6.73211
		Bkgrnd.	63932.2	63790.1	63860.8		63861		71.0268
5 mM Auxin	GFP		54214.6	54212.8	54210.5	54212.6		9670.45	2.05025
		Bkgrnd.	63812.9	63868.6	63967.7		63883.1		78.4409
10 mM Auxin	GFP		52460.4	52509.3	52451.9	52473.9		11448.9	30.9891
		Bkgrnd.	63833.3	63873.6	64061.3		63922.7		121.673
3.1Lsp2-Gal4[ts]	Rp49		53742.3	53742.3	53744.6	53743.1		10451.6	1.32271
		Bkgrnd.	64147.1	64211.7	64225.2		64194.7		41.7225
0 mM Auxin	Rp49		53698.5	53713.3	53713.3	53708.4		10432.3	8.54421
		Bkgrnd.	64118	64127.6	64176.4		64140.6		31.3269
1 mM Auxin	Rp49		53374.1	53379.1	53549.7	53434.3		10720.1	99.9587
		Bkgrnd.	64145.4	64181.4	64136.2		64154.4		23.8759
2.5 mM Auxin	Rp49		52962.6	53000.6	53000.6	52987.9		11238	21.9295
		Bkgrnd.	64203.6	64217.4	64256.7		64225.9		27.5977
5 mM Auxin	Rp49		52885.8	52882.5	52922.9	52897.1		11352.8	22.4316
		Bkgrnd.	64257.1	64254.1	64238.3		64249.8		10.0685
10 mM Auxin	Rp49		52021	51930	51912.4	51954.5		12354.8	58.2685
		Bkgrnd.	64268.9	64324.1	64334.8		64309.3		35.3617
	Rp49 Intensity	GFP Intensity	Adjusted	Normalized
3.1Lsp2-Gal4[ts]	10451.6	9841.55	0.941634	1
0 mM Auxin	10432.3	930.84	0.0892269	0.0947576
1 mM Auxin	10720.1	5749.5	0.53633	0.569574
2.5 mM Auxin	11238	7904.66	0.703388	0.746987
5 mM Auxin	11352.8	9670.45	0.851815	0.904614
10 mM Auxin	12354.8	11448.9	0.926672	0.984112
