# Supplementary material for: Auxin exposure disrupts feeding behavior and fatty acid metabolism in adult Drosophila
Source: eLife. 2024 Jan 19;12:RP91953. doi: 10.7554/eLife.91953 (PMC10945601; doi:10.7554/eLife.91953)
Supplement: Figure 1—figure supplement 1—source data 2. [file elife-91953-fig1-figsupp1-data2.xlsx]

## Sheet: ts
Condition	PCR Transcript		Read 1	Read 2	Read 3	Ave Mean	Ave Bkgrd	Adj Mean	Std. Dev.
3.1Lsp2-Gal4[ts] - pre	GFP		61229.8	61239	61249.4	61239.4		3.67733	9.79194
		Bkgrnd.	61250.9	61250.9	61227.4		61243.1		13.5441
3.1Lsp2-Gal4[ts] + Auxin	GFP		40427.8	40398	40418	40414.6		19208.7	15.1584
		Bkgrnd.	59657.3	59608	59604.5		59623.3		29.4964
3.1Lsp2-Gal4[ts] - Auxin, 24 hr	GFP		51201.1	51239.1	51165.9	51202.1		8397.86	36.5875
		Bkgrnd.	59635.3	59584.7	59579.7		59599.9		30.7631
3.1Lsp2-Gal4[ts] - Auxin, 48 hr	GFP		57423	57446.3	57449.9	57439.7		2424	14.586
		Bkgrnd.	59867.5	59866.8	59856.9		59863.7		5.95236
3.1Lsp2-Gal4[ts] - Auxin, 72 hr	GFP		59458.1	59462.5	59447.4	59456		607.542	7.74066
		Bkgrnd.	60062.7	60057	60070.9		60063.5		6.98626
3.1Lsp2-Gal4[ts] - Auxin, 96 hr	GFP		59266.5	59271.9	59261.6	59266.7		690.524	5.1322
		Bkgrnd.	59971.4	59935	59965.2		59957.2		19.4732
3.1Lsp2-Gal4[ts] - pre	Rp49		39331.1	39332.6	39018.4	39227.4		24262.6	181.008
		Bkgrnd.	63322.9	63478.3	63668.7		63490		173.191
3.1Lsp2-Gal4[ts] + Auxin	Rp49		34757.3	34757.3	34757.3	34757.3		27795	0
		Bkgrnd.	62517.7	62635	62504.2		62552.3		71.9117
3.1Lsp2-Gal4[ts] - Auxin, 24 hr	Rp49		42858.9	42417.1	41854.1	42376.7		20545.2	503.635
		Bkgrnd.	62967	62847.9	62950.8		62921.9		64.5826
3.1Lsp2-Gal4[ts] - Auxin, 48 hr	Rp49		39100.1	39088.8	39088.8	39092.6		23550.1	6.54484
		Bkgrnd.	62780.6	62700.6	62446.8		62642.7		174.295
3.1Lsp2-Gal4[ts] - Auxin, 72 hr	Rp49		37755	37900.1	37686	37780.4		24603	109.271
		Bkgrnd.	62335.6	62440.9	62373.5		62383.3		53.3644
3.1Lsp2-Gal4[ts] - Auxin, 96 hr	Rp49		38443.2	38425.2	38224.6	38364.3		24036	121.367
		Bkgrnd.	62230.7	62471.5	62498.9		62400.4		147.565
	Rp49 Intensity	GFP Intensity	Adjusted	Normalized
3.1Lsp2-Gal4[ts] - pre	24262.6	3.67733	0.000151564	0.0219313
3.1Lsp2-Gal4[ts] + Auxin	27795	19208.7	0.691084	100
3.1Lsp2-Gal4[ts] - Auxin, 24 hr	20545.2	8397.86	0.40875	59.1462
3.1Lsp2-Gal4[ts] - Auxin, 48 hr	23550.1	2424	0.102929	14.8939
3.1Lsp2-Gal4[ts] - Auxin, 72 hr	24603	607.542	0.0246939	3.5732
3.1Lsp2-Gal4[ts] - Auxin, 96 hr	24036	690.524	0.0287287	4.15705

## Sheet: AGES
Condition	PCR Transcript		Read 1	Read 2	Read 3	Ave Mean	Ave Bkgrd	Adj Mean	Std. Dev.
3.1Lsp2-Gal4[AGES] - pre	GFP		60019.2	59773.4	59952.1	59914.9		170.598	127.035
		Bkgrnd.	60077	60068.9	60110.6		60085.5		22.1385
3.1Lsp2-Gal4[AGES] + Auxin	GFP		36762.1	36728.2	36996.3	36828.9		22467.4	146.011
		Bkgrnd.	59224.4	59342.4	59321.8		59296.2		63.0243
3.1Lsp2-Gal4[AGES] - Auxin, 24 hr	GFP		57813.8	57727	57793.6	57778.1		2140.99	45.4376
		Bkgrnd.	59916.2	59922.6	59918.5		59919.1		3.27289
3.1Lsp2-Gal4[AGES] - Auxin, 48 hr	GFP		59801.5	59805.7	59794.9	59800.7		253.24	5.41008
		Bkgrnd.	60050.4	60048.9	60062.5		60053.9		7.47369
3.1Lsp2-Gal4[AGES] - Auxin, 72 hr	GFP		60143.7	60149.7	60127.5	60140.3		20.455	11.4612
		Bkgrnd.	60123.6	60124.3	60111.6		60119.8		7.12944
3.1Lsp2-Gal4[AGES] - Auxin, 96 hr	GFP		59306.8	59266.7	59266.7	59280.1		714.286	23.1552
		Bkgrnd.	59998.6	59995.2	59989.3		59994.3		4.72937
3.1Lsp2-Gal4[AGES] - pre	Rp49		46371.8	46314.3	46286.1	46324.1		17061.8	43.7197
		Bkgrnd.	63449.3	63396.5	63311.8		63385.8		69.3631
3.1Lsp2-Gal4[AGES] + Auxin	Rp49		39255.8	39414.6	39257.2	39309.2		23290.1	91.2551
		Bkgrnd.	62720	62646.8	62431		62599.3		150.258
3.1Lsp2-Gal4[AGES] - Auxin, 24 hr	Rp49		45860.3	45939.8	45815.2	45871.8		17067.5	63.0961
		Bkgrnd.	62725.6	62984.1	63108.1		62939.3		195.134
3.1Lsp2-Gal4[AGES] - Auxin, 48 hr	Rp49		39491.6	39566.7	39748.3	39602.2		23490.3	131.952
		Bkgrnd.	63079.6	63104.4	63093.5		63092.5		12.3926
3.1Lsp2-Gal4[AGES] - Auxin, 72 hr	Rp49		46003	45926.5	45979.7	45969.8		17145.6	39.208
		Bkgrnd.	63176.4	63104.3	63065.3		63115.3		56.3448
3.1Lsp2-Gal4[AGES] - Auxin, 96 hr	Rp49		39240.4	39148.7	39161.1	39183.4		23550.2	49.7846
		Bkgrnd.	62755.2	62624.9	62820.6		62733.6		99.6366
	Rp49 Intensity	GFP Intensity	Adjusted	Normalized
3.1Lsp2-Gal4[AGES] - pre	17061.8	170.598	0.00999886	1.0365
3.1Lsp2-Gal4[AGES] + Auxin	23290.1	22467.4	0.964676	100
3.1Lsp2-Gal4[AGES] - Auxin, 24 hr	17067.5	2140.99	0.125443	13.0036
3.1Lsp2-Gal4[AGES] - Auxin, 48 hr	23490.3	253.24	0.0107806	1.11754
3.1Lsp2-Gal4[AGES] - Auxin, 72 hr	17145.6	20.455	0.00119302	0.123671
3.1Lsp2-Gal4[AGES] - Auxin, 96 hr	23550.2	714.286	0.0303303	3.1441
