# Supplementary material for: Auxin exposure disrupts feeding behavior and fatty acid metabolism in adult Drosophila
Source: eLife. 2024 Jan 19;12:RP91953. doi: 10.7554/eLife.91953 (PMC10945601; doi:10.7554/eLife.91953)
Supplement: Figure 1—figure supplement 1—source data 3. [file elife-91953-fig1-figsupp1-data3.xlsx]

## Sheet: Sheet1
			(-) auxin	(w1118)													(+) 5 mM auxin in food	(w1118)
		hours after egg laying	120	132	144	156	168	180	192	204	216	228					hours after egg laying	120	132	144	156	168	180	192	204	216	228	240	252	264	276	288	300	312	324	336	348	360	372	386	398	410	422	434	446	458	470	482
		vial 1	0	0	0	0	0	17	19	6	1	1					Vial 1	0	0	0	0	0	0	0	0	0	0	0	1	0	0	1	8	2	3	4	0	0	3	2	0	0	2	1	3	0	2	0
		vial 2	0	0	0	0	0	15	15	6	2	1					Vial 2	0	0	0	0	0	0	0	0	0	0	0	0	0	0	0	1	0	3	3	4	3	1	3	1	5	4	1	3	0	1	0
		vial 3	0	0	0	0	0	13	26	4	1	0					Vial 3	0	0	0	0	0	0	0	0	0	0	0	0	0	1	0	4	1	4	1	2	4	7	4	1	3	3	0	1	0	0	0
		vial 4	0	0	0	0	0	15	22	2	2	1					Vial 4	0	0	0	0	0	0	0	0	0	0	0	0	0	0	1	5	3	2	3	4	3	7	1	0	4	2	2	2	0	0	0
		vial 5	0	0	0	0	0	21	10	7	1	1					Vial 5	0	0	0	0	0	0	0	0	0	0	0	0	0	0	0	2	1	1	2	2	1	1	2	1	2	3	6	4	0	0	0
		vial 6	0	0	0	0	0	17	13	4	0	0					Vial 6	0	0	0	0	0	0	0	0	0	0	0	0	0	0	0	2	0	2	2	3	1	6	0	2	5	4	0	2	1	0	0
		vial 7	0	0	0	0	0	16	21	4	2	0					Vial 7	0	0	0	0	0	0	0	0	0	0	0	0	0	0	1	2	0	3	2	3	0	1	1	1	4	2	3	2	4	0	0
		vial 8	0	0	0	0	10	30	5	0	0	0					Vial 8	0	0	0	0	0	0	0	0	0	0	0	4	2	11	2	1	5	10	2	7	1	2	0	1	0	0	0	1	0	0	0
		vial 9	0	0	0	0	17	21	3	1	0	0					Vial 9	0	0	0	0	0	0	0	0	0	0	0	1	4	4	5	8	1	6	8	4	2	2	0	0	0	1	0	0	0	0	0
		vial 10	0	0	0	0	10	22	7	1	1	0					Vial 10	0	0	0	0	0	0	0	0	0	0	0	4	6	5	2	9	1	2	7	3	3	5	2	0	0	0	0	0	0	0	0
		vial 11	0	0	0	0	22	20	2	0	0	0					Vial 11	0	0	0	0	0	0	0	0	0	1	1	4	8	10	3	8	0	4	0	3	0	1	3	0	0	0	0	0	0	0	0
		vial 12	0	0	0	0	17	23	4	2	0	0					Vial 12	0	0	0	0	0	0	0	0	0	0	0	0	0	2	1	2	1	3	2	3	0	1	0	1	0	1	0	0	0	0	0
		vial 13	0	0	0	0	17	21	5	1	0	0					Vial 13	0	0	0	0	0	0	0	0	0	0	0	1	0	0	2	7	4	1	2	2	0	2	0	2	0	0	0	1	0	0	0
		vial 14	0	0	0	0	16	23	4	0	0	0					Vial 14	0	0	0	0	0	0	0	0	0	0	0	1	0	5	3	3	3	5	1	1	1	3	0	0	1	0	0	0	0	0	0
		total pupae	0	0	0	0	109	274	156	38	10	4					total pupae	0	0	0	0	0	0	0	0	0	1	1	16	20	38	21	62	22	49	39	41	19	42	18	10	24	22	13	19	5	3	0
