# Supplementary material for: Auxin exposure disrupts feeding behavior and fatty acid metabolism in adult Drosophila
Source: eLife. 2024 Jan 19;12:RP91953. doi: 10.7554/eLife.91953 (PMC10945601; doi:10.7554/eLife.91953)
Supplement: Figure 1—figure supplement 2—source data 1. [file elife-91953-fig1-figsupp2-data1.xlsx]

## Sheet: Sheet1
Chemical	stock conc in mM	Final ml of 4mMsucrose, 1.5mM yeast extract test solution/day	Final Auxin concentration	ml of 500mM Auxin	ml of 1 mM NaOH	ml of water	ml of 16mM sucrose, 6mM yeast extract												final % NaOH		%NAOH contributed by E E	how much more do we need?
Auxin	500	10	0	0	1	6.5	2.5												0.01		0	0.1
stock made with	water	10	5	0.1	0.99	6.41	2.5												0.01		0.0001	0.0999
	enter 'water' or solvent name	10	10	0.2	0.98	6.32	2.5												0.01		0.0002	0.0998
number of days	2	10	20	0.4	0.96	6.14	2.5												0.01		0.0004	0.0996
		10	30	0.6	0.94	5.96	2.5												0.01		0.0006	0.0994
number of replicates	6	10	45	0.9	0.91	5.69	2.5												0.01		0.0009	0.0991
		10	60	1.2	0.88	5.42	2.5												0.01		0.0012	0.0988
number of blue samples	0	10	75	1.5	0.85	5.15	2.5												0.01		0.0015	0.85
		10	90	1.8	0.82	4.88	2.5												0.01		0.0018	0.82
		10	125	2.5	0.75	4.25	2.5												0.01		0.0025	0.0075
		10	350	7	0.3	0.2	2.5
		# of treatments to be tested	11	total NaOH stock:	9.08
		To make solutions on Day 1:					Blue Treatment Vials:
16.2	ml of auxin/day	Add water in column F Add yeast sucrose volume in column G					Second set to be removed at 24 hrs: Label & place in freezer
27.5	ml of 8mM S, 3mM YE/day	Add chemical in column E Mix and remove amount for blue sample (Column H)					Thom will take photographs
		Add water in column I to the undyed sample Add blue dye in column J to the Blue dye sample
66	VIALS OF EACH SEX NEEDED	Mix each tube and add 0.75 ml of the appropriate solution to each treatment vial
THIS EXPERIMENT WAS DONE USING OreR FLIES
sample #	sex	treatment	Total Flies at start	# dead at 24 hr	# dead at 48 hr	# live at 48 hr	Total flies at end	total at start = total end?	% Effected		Females				Males					Male			Female
1	M	0_mM_Auxin_0.01%NaOH_control	20	0	0	20	20	yes	0		(mM)	Starting number	Number dead		(mM)	Starting number	Number dead			Average	SD	N	Average	SD	N
2	F	0_mM_Auxin_0.01%NaOH_control	20	0	1	19	19	no	5		0	20	1		0	20	0		0 mM	1.46617	2.65124	6	1.66667	2.58199	6
3	M	0_mM_Auxin_0.01%NaOH_control	20	1	1	19	19	no	5		0	20	0		0	20	1		5 mM	0.833333	2.88275	6	2.63158	2.88275	6
4	F	0_mM_Auxin_0.01%NaOH_control	20	0	0	20	20	yes	0		0	20	0		0	20	0		10 mM	9.51754	7.76814	6	1.71053	2.65124	6
5	M	0_mM_Auxin_0.01%NaOH_control	20	0	0	20	20	yes	0		0	20	0		0	20	0		20 mM	85.7143	0	6	11.8908	4.04523	6
6	F	0_mM_Auxin_0.01%NaOH_control	20	0	0	20	20	yes	0		0	20	0		0	19	1		30 mM	99.1667	2.04124	6	61.4912	15.8967	6
7	M	0_mM_Auxin_0.01%NaOH_control	20	0	0	20	20	yes	0		0	20	1		0	19	0		45 mM	100	0	6	94.9123	5.47891	6
8	F	0_mM_Auxin_0.01%NaOH_control	20	0	0	20	20	yes	0		5	19	1		5	20	0		60 mM	100	0	6	99.1228	2.14868	6
9	M	0_mM_Auxin_0.01%NaOH_control	19	0	1	18	18	no	5.26316		5	20	0		5	20	0		75 mM	100	0	6	96.4912	2.71788	6
10	F	0_mM_Auxin_0.01%NaOH_control	20	0	0	20	20	yes	0		5	19	0		5	20	0		90 mM	100	0	6	97.1133	4.88414	6
11	M	0_mM_Auxin_0.01%NaOH_control	19	0	0	19	19	yes	0		5	19	1		5	20	1		125 mM	99.1228	2.14868	6	100	0	6
12	F	0_mM_Auxin_0.01%NaOH_control	20	0	1	19	19	no	5		5	19	1		5	20	0		350 mM	100	0	6	100	0	6
13	M	5_mM_Auxin	20	0	0	20	20	yes	0		5	20	0		5	18	0
14	F	5_mM_Auxin	19	0	1	18	18	no	5.26316		10	20	0		10	20	0
15	M	5_mM_Auxin	20	0	0	20	20	yes	0		10	19	0		10	20	2
16	F	5_mM_Auxin	20	0	0	20	20	yes	0		10	20	0		10	19	3
17	M	5_mM_Auxin	20	0	0	20	20	yes	0		10	19	1		10	20	1
18	F	5_mM_Auxin	19	0	0	19	19	yes	0		10	20	0		10	19	1
19	M	5_mM_Auxin	20	0	1	19	19	no	5		10	20	1		10	19	4
20	F	5_mM_Auxin	19	0	1	18	18	no	5.26316		20	20	2		20	20	20
21	M	5_mM_Auxin	20	0	0	20	20	yes	0		20	20	3		20	20	20
22	F	5_mM_Auxin	19	1	1	18	18	no	5.26316		20	20	2		20	20	20
23	M	5_mM_Auxin	18	0	0	18	18	yes	0		20	18	1		20	20	20
24	F	5_mM_Auxin	20	0	0	20	20	yes	0		20	19	3		20	20	20
25	M	10_mM_Auxin	20	0	0	20	20	yes	0		20	20	3		20	20	20
26	F	10_mM_Auxin	20	0	0	20	20	yes	0		30	19	7		30	20	20
27	M	10_mM_Auxin	20	0	2	18	18	no	10		30	20	11		30	19	19
28	F	10_mM_Auxin	19	0	0	19	19	yes	0		30	20	13		30	20	19
29	M	10_mM_Auxin	19	0	3	16	16	no	15.7895		30	20	14		30	20	20
30	F	10_mM_Auxin	20	0	0	20	20	yes	0		30	19	11		30	20	20
31	M	10_mM_Auxin	20	0	1	19	19	no	5		30	19	16		30	20	20
32	F	10_mM_Auxin	19	0	1	18	18	no	5.26316		45	20	17		45	20	20
33	M	10_mM_Auxin	19	0	1	18	18	no	5.26316		45	18	18		45	20	20
34	F	10_mM_Auxin	20	0	0	20	20	yes	0		45	20	20		45	20	20
35	M	10_mM_Auxin	19	0	4	15	15	no	21.0526		45	19	18		45	19	19
36	F	10_mM_Auxin	20	1	1	19	19	no	5		45	19	18		45	20	20
37	M	20_mM_Auxin	20	16	20	0	0	no	100		45	20	19		45	19	19
38	F	20_mM_Auxin	20	0	2	18	18	no	10		60	20	20		60	20	20
39	M	20_mM_Auxin	20	10	20	0	0	no	100		60	20	20		60	19	19
40	F	20_mM_Auxin	20	0	3	17	17	no	15		60	19	19		60	19	19
41	M	20_mM_Auxin	20	11	20	0	0	no	100		60	19	18		60	20	20
42	F	20_mM_Auxin	20	0	2	18	18	no	10		60	20	20		60	20	20
43	M	20_mM_Auxin	20	13	20	0	0	no	100		60	20	20		60	20	20
44	F	20_mM_Auxin	18	0	1	17	17	no	5.55556		75	19	18		75	17	17
45	M	20_mM_Auxin	20	16	20	0	0	no	100		75	19	18		75	19	19
46	F	20_mM_Auxin	19	0	3	16	16	no	15.7895		75	20	20		75	20	20
47	M	20_mM_Auxin	20	13	20	0	0	no	100		75	19	18		75	19	19
48	F	20_mM_Auxin	20	0	3	17	17	no	15		75	20	20		75	20	20
49	M	30_mM_Auxin	20	20	20	0	0	no	100		75	19	18		75	20	20
50	F	30_mM_Auxin	19	0	7	12	12	no	36.8421		90	19	19		90	19	19
51	M	30_mM_Auxin	19	19	19	0	0	no	100		90	17	15		90	20	20
52	F	30_mM_Auxin	20	0	11	9	9	no	55		90	19	19		90	20	20
53	M	30_mM_Auxin	20	19	19	1	1	no	95		90	18	17		90	20	20
54	F	30_mM_Auxin	20	1	13	7	7	no	65		90	20	20		90	20	20
55	M	30_mM_Auxin	20	18	20	0	0	no	100		90	19	19		90	20	20
56	F	30_mM_Auxin	20	0	14	6	6	no	70		125	20	20		125	20	20
57	M	30_mM_Auxin	20	19	20	0	0	no	100		125	20	20		125	20	20
58	F	30_mM_Auxin	19	2	11	8	8	no	57.8947		125	19	19		125	20	20
59	M	30_mM_Auxin	20	20	20	0	0	no	100		125	20	20		125	18	18
60	F	30_mM_Auxin	19	1	16	3	3	no	84.2105		125	18	18		125	19	18
61	M	45_mM_Auxin	20	19	20	0	0	no	100		125	20	20		125	19	19
62	F	45_mM_Auxin	20	0	17	3	3	no	85		350	20	20		350	19	19
63	M	45_mM_Auxin	20	19	20	0	0	no	100		350	20	20		350	20	20
64	F	45_mM_Auxin	18	5	18	0	0	no	100		350	20	20		350	20	20
65	M	45_mM_Auxin	20	19	20	0	0	no	100		350	20	20		350	19	19
66	F	45_mM_Auxin	20	4	20	0	0	no	100		350	19	19		350	20	20
67	M	45_mM_Auxin	19	19	19	0	0	no	100		350	20	20		350	19	19
68	F	45_mM_Auxin	19	2	18	1	1	no	94.7368
69	M	45_mM_Auxin	20	20	20	0	0	no	100
70	F	45_mM_Auxin	19	1	18	1	1	no	94.7368
71	M	45_mM_Auxin	19	19	19	0	0	no	100
72	F	45_mM_Auxin	20	4	19	1	1	no	95
73	M	60_mM_Auxin	20	20	20	0	0	no	100
74	F	60_mM_Auxin	20	6	20	0	0	no	100
75	M	60_mM_Auxin	19	19	19	0	0	no	100
76	F	60_mM_Auxin	20	5	20	0	0	no	100
77	M	60_mM_Auxin	19	19	19	0	0	no	100
78	F	60_mM_Auxin	19	5	19	0	0	no	100
79	M	60_mM_Auxin	20	20	20	0	0	no	100
80	F	60_mM_Auxin	19	6	18	1	1	no	94.7368
81	M	60_mM_Auxin	20	20	20	0	0	no	100
82	F	60_mM_Auxin	20	1	20	0	0	no	100
83	M	60_mM_Auxin	20	20	20	0	0	no	100
84	F	60_mM_Auxin	20	3	20	0	0	no	100
85	M	75_mM_Auxin	17	17	17	0	0	no	100
86	F	75_mM_Auxin	19	5	18	1	1	no	94.7368
87	M	75_mM_Auxin	19	19	19	0	0	no	100
88	F	75_mM_Auxin	19	5	18	1	1	no	94.7368
89	M	75_mM_Auxin	20	20	20	0	0	no	100
90	F	75_mM_Auxin	20	6	20	0	0	no	100
91	M	75_mM_Auxin	19	19	19	0	0	no	100
92	F	75_mM_Auxin	19	5	18	1	1	no	94.7368
93	M	75_mM_Auxin	20	20	20	0	0	no	100
94	F	75_mM_Auxin	20	7	20	0	0	no	100
95	M	75_mM_Auxin	20	20	20	0	0	no	100
96	F	75_mM_Auxin	19	6	18	1	1	no	94.7368
97	M	90_mM_Auxin	19	19	19	0	0	no	100
98	F	90_mM_Auxin	19	11	19	0	0	no	100
99	M	90_mM_Auxin	20	20	20	0	0	no	100
100	F	90_mM_Auxin	17	10	15	2	2	no	88.2353
101	M	90_mM_Auxin	20	20	20	0	0	no	100
102	F	90_mM_Auxin	19	13	19	0	0	no	100
103	M	90_mM_Auxin	20	20	20	0	0	no	100
104	F	90_mM_Auxin	18	6	17	1	1	no	94.4444
105	M	90_mM_Auxin	20	20	20	0	0	no	100
106	F	90_mM_Auxin	20	9	20	0	0	no	100
107	M	90_mM_Auxin	20	20	20	0	0	no	100
108	F	90_mM_Auxin	19	8	19	0	0	no	100
109	M	125_mM_Auxin	20	20	20	0	0	no	100
110	F	125_mM_Auxin	20	13	20	0	0	no	100
111	M	125_mM_Auxin	20	20	20	0	0	no	100
112	F	125_mM_Auxin	20	16	20	0	0	no	100
113	M	125_mM_Auxin	20	20	20	0	0	no	100
114	F	125_mM_Auxin	19	14	19	0	0	no	100
115	M	125_mM_Auxin	18	18	18	0	0	no	100
116	F	125_mM_Auxin	20	10	20	0	0	no	100
117	M	125_mM_Auxin	19	19	18	1	1	no	94.7368
118	F	125_mM_Auxin	18	13	18	0	0	no	100
119	M	125_mM_Auxin	19	19	19	0	0	no	100
120	F	125_mM_Auxin	20	11	20	0	0	no	100
121	M	350_mM_Auxin	19	19	19	0	0	no	100
122	F	350_mM_Auxin	20	20	20	0	0	no	100
123	M	350_mM_Auxin	20	20	20	0	0	no	100
124	F	350_mM_Auxin	20	17	20	0	0	no	100
125	M	350_mM_Auxin	20	20	20	0	0	no	100
126	F	350_mM_Auxin	20	17	20	0	0	no	100
127	M	350_mM_Auxin	19	19	19	0	0	no	100
128	F	350_mM_Auxin	20	16	20	0	0	no	100
129	M	350_mM_Auxin	20	20	20	0	0	no	100
130	F	350_mM_Auxin	19	15	19	0	0	no	100
131	M	350_mM_Auxin	19	19	19	0	0	no	100
132	F	350_mM_Auxin	20	18	20	0	0	no	100
