# Supplementary material for: Auxin exposure disrupts feeding behavior and fatty acid metabolism in adult Drosophila
Source: eLife. 2024 Jan 19;12:RP91953. doi: 10.7554/eLife.91953 (PMC10945601; doi:10.7554/eLife.91953)
Supplement: Figure 1—figure supplement 2—source data 2. [file elife-91953-fig1-figsupp2-data2.xlsx]

## Sheet: Oregon-R_0mM_Female
Treatment	DFM	Chamber	Licks	Events	MeanDuration	MedDuration	MeanTimeBtw	MedTimeBtw	MeanInt	MedianInt	MinInt	MaxInt	StartMin	EndMin	BaselineWindowMin	FeedingThreshold	FeedingMinimum	TastingLow	TastingHigh	FeedingMinEvents	TastingMinEvents	SamplesSec	ChamberSize	Ch1	Ch2	Ch3	Ch4	Ch5	Ch6	Ch7	Ch8	Ch9	Ch10	Ch11	Ch12	Link.Gap	PI.Multiplier
0mM_female	1	1	0	0	NA	NA	86399.4	86399.4	NA	NA	NA	NA	0	0	3	10	10	0	10	1	1	5	1	1	2	3	4	5	6	7	8	9	10	11	12	5	0
0mM_female	1	2	14514	750	4.1512	2.9	110.9	20	50.987	45	-5	269	0	0	3	10	10	0	10	1	1	5	1	1	2	3	4	5	6	7	8	9	10	11	12	5	0
0mM_female	1	3	13993	456	6.31272	4.4	182.759	76.4	66.6301	63	-1	246	0	0	3	10	10	0	10	1	1	5	1	1	2	3	4	5	6	7	8	9	10	11	12	5	0
0mM_female	1	7	5212	420	2.64333	1.6	202.587	19	59.2176	49	-1	323	0	0	3	10	10	0	10	1	1	5	1	1	2	3	4	5	6	7	8	9	10	11	12	5	0
0mM_female	1	8	1215	67	3.91642	3.8	1285.63	233.8	146.065	133.5	-1	427	0	0	3	10	10	0	10	1	1	5	1	1	2	3	4	5	6	7	8	9	10	11	12	5	0
0mM_female	1	9	1300	109	2.53578	2	782.936	128.7	47.5572	40.5	0	205	0	0	3	10	10	0	10	1	1	5	1	1	2	3	4	5	6	7	8	9	10	11	12	5	0
0mM_female	2	1	17982	558	6.72832	4.6	147.844	9	79.7427	71	-8	436	0	0	3	10	10	0	10	1	1	5	1	1	2	3	4	5	6	7	8	9	10	11	12	5	0
0mM_female	2	2	29772	1086	5.77274	3.8	73.7167	15.2	57.11	51	-30	265	0	0	3	10	10	0	10	1	1	5	1	1	2	3	4	5	6	7	8	9	10	11	12	5	0
0mM_female	2	3	17399	784	4.66556	3.2	105.403	16.4	60.8817	53	-1	311	0	0	3	10	10	0	10	1	1	5	1	1	2	3	4	5	6	7	8	9	10	11	12	5	0
0mM_female	2	7	5124	434	2.59585	1.2	196.029	10.6	55.9505	45	-1	275	0	0	3	10	10	0	10	1	1	5	1	1	2	3	4	5	6	7	8	9	10	11	12	5	0
0mM_female	2	8	5240	262	4.27405	3	324.256	49.4	69.0061	59	0	320	0	0	3	10	10	0	10	1	1	5	1	1	2	3	4	5	6	7	8	9	10	11	12	5	0
0mM_female	2	9	8050	396	4.28384	2	213.357	22.4	61.2009	49	-7	280	0	0	3	10	10	0	10	1	1	5	1	1	2	3	4	5	6	7	8	9	10	11	12	5	0
0mM_female	3	1	25300	636	8.52736	5.2	127.122	7.2	81.539	73	-69	306	0	0	3	10	10	0	10	1	1	5	1	1	2	3	4	5	6	7	8	9	10	11	12	5	0
0mM_female	3	2	55857	1395	8.60186	4.4	53.2956	4.6	62.3289	52	-76	366	0	0	3	10	10	0	10	1	1	5	1	1	2	3	4	5	6	7	8	9	10	11	12	5	0
0mM_female	3	3	59742	1340	9.52731	6	54.9095	4.4	66.9268	60	-78	320	0	0	3	10	10	0	10	1	1	5	1	1	2	3	4	5	6	7	8	9	10	11	12	5	0
0mM_female	3	7	2655	144	3.925	2.3	591.966	32.4	64.4002	53	-1	331	0	0	3	10	10	0	10	1	1	5	1	1	2	3	4	5	6	7	8	9	10	11	12	5	0
0mM_female	3	8	7239	461	3.30759	2	183.713	17	61.5164	53	0	321	0	0	3	10	10	0	10	1	1	5	1	1	2	3	4	5	6	7	8	9	10	11	12	5	0
0mM_female	3	9	3250	173	4.02543	2.4	492.551	26.5	56.755	51	-3	232	0	0	3	10	10	0	10	1	1	5	1	1	2	3	4	5	6	7	8	9	10	11	12	5	0
0mM_female	4	4	25	2	2.5	2.5	28798.5	30098	17.32	15	11	31	0	0	3	10	10	0	10	1	1	5	1	1	2	3	4	5	6	7	8	9	10	11	12	5	0
0mM_female	4	5	3268	166	4.23373	2.6	513.16	86.6	61.3475	45	-37	320	0	0	3	10	10	0	10	1	1	5	1	1	2	3	4	5	6	7	8	9	10	11	12	5	0
0mM_female	4	6	1368	122	2.43934	1.8	700.024	162.2	38.3508	22	-1	265	0	0	3	10	10	0	10	1	1	5	1	1	2	3	4	5	6	7	8	9	10	11	12	5	0
0mM_female	4	10	19550	399	10.6261	3.6	205.917	4.6	78.9939	69	-133	337	0	0	3	10	10	0	10	1	1	5	1	1	2	3	4	5	6	7	8	9	10	11	12	5	0
0mM_female	4	11	55529	1557	7.70096	5.6	47.7601	4	56.685	53	-57	314	0	0	3	10	10	0	10	1	1	5	1	1	2	3	4	5	6	7	8	9	10	11	12	5	0
0mM_female	4	12	40215	1184	7.40557	4.6	65.5126	4.8	66.1016	62	-65	320	0	0	3	10	10	0	10	1	1	5	1	1	2	3	4	5	6	7	8	9	10	11	12	5	0
0mM_female	5	4	2027	132	3.28788	1	646.364	102.2	44.9203	35	0	233	0	0	3	10	10	0	10	1	1	5	1	1	2	3	4	5	6	7	8	9	10	11	12	5	0
0mM_female	5	5	5581	312	3.81026	2.6	272.242	22	46.4926	38	-13	233	0	0	3	10	10	0	10	1	1	5	1	1	2	3	4	5	6	7	8	9	10	11	12	5	0
0mM_female	5	6	4027	197	4.41726	3.4	431.971	74.9	56.4114	51	-1	192	0	0	3	10	10	0	10	1	1	5	1	1	2	3	4	5	6	7	8	9	10	11	12	5	0
0mM_female	5	10	71054	1867	8.38597	2.6	37.8714	3.2	62.1369	51	-124	345	0	0	3	10	10	0	10	1	1	5	1	1	2	3	4	5	6	7	8	9	10	11	12	5	0
0mM_female	5	11	34906	1402	5.50656	4	56.08	7	35.2603	31	-13	255	0	0	3	10	10	0	10	1	1	5	1	1	2	3	4	5	6	7	8	9	10	11	12	5	0
0mM_female	5	12	55625	1533	7.9606	3.8	48.3682	3.4	61.7777	53	-115	342	0	0	3	10	10	0	10	1	1	5	1	1	2	3	4	5	6	7	8	9	10	11	12	5	0
0mM_female	6	4	1791	155	2.4129	1.6	551.451	92.1	45.5759	40	-1	169	0	0	3	10	10	0	10	1	1	5	1	1	2	3	4	5	6	7	8	9	10	11	12	5	0
0mM_female	6	5	459	31	3.12258	0.8	2696.99	174.5	18.6136	14.5	1	214	0	0	3	10	10	0	10	1	1	5	1	1	2	3	4	5	6	7	8	9	10	11	12	5	0
0mM_female	6	6	0	0	NA	NA	86400.4	86400.4	NA	NA	NA	NA	0	0	3	10	10	0	10	1	1	5	1	1	2	3	4	5	6	7	8	9	10	11	12	5	0
0mM_female	6	10	62468	1808	7.5271	4	40.2385	3.6	49.2859	43	-62	266	0	0	3	10	10	0	10	1	1	5	1	1	2	3	4	5	6	7	8	9	10	11	12	5	0
0mM_female	6	11	60689	1584	8.29937	4.8	46.2172	3.6	57.4226	54	-63	346	0	0	3	10	10	0	10	1	1	5	1	1	2	3	4	5	6	7	8	9	10	11	12	5	0
0mM_female	6	12	34529	965	7.6029	4.8	81.8464	9.8	52.3798	49	-43	221	0	0	3	10	10	0	10	1	1	5	1	1	2	3	4	5	6	7	8	9	10	11	12	5	0
Averages			22028.2	693.485	5.47071	3.22424

## Sheet: Oregon-R_10mM_Female
Treatment	DFM	Chamber	Licks	Events	MeanDuration	MedDuration	MeanTimeBtw	MedTimeBtw	MeanInt	MedianInt	MinInt	MaxInt	StartMin	EndMin	BaselineWindowMin	FeedingThreshold	FeedingMinimum	TastingLow	TastingHigh	FeedingMinEvents	TastingMinEvents	SamplesSec	ChamberSize	Ch1	Ch2	Ch3	Ch4	Ch5	Ch6	Ch7	Ch8	Ch9	Ch10	Ch11	Ch12	Link.Gap	PI.Multiplier
10mM_female	4	1	7950	263	6.42357	4.2	320.875	29.1	74.2713	70	-4	296	0	0	3	10	10	0	10	1	1	5	1	1	2	3	4	5	6	7	8	9	10	11	12	5	0
10mM_female	4	2	4584	273	3.63956	2.8	311.704	32.7	57.2546	52	-1	359	0	0	3	10	10	0	10	1	1	5	1	1	2	3	4	5	6	7	8	9	10	11	12	5	0
10mM_female	4	3	18716	645	6.14915	3.8	127.805	16.2	72.0944	69	-33	320	0	0	3	10	10	0	10	1	1	5	1	1	2	3	4	5	6	7	8	9	10	11	12	5	0
10mM_female	4	7	6718	196	7.09388	5.2	431.523	23.8	65.5062	58	-24	256	0	0	3	10	10	0	10	1	1	5	1	1	2	3	4	5	6	7	8	9	10	11	12	5	0
10mM_female	4	8	8028	329	5.19878	3.6	256.636	27.5	64.9766	59	-35	224	0	0	3	10	10	0	10	1	1	5	1	1	2	3	4	5	6	7	8	9	10	11	12	5	0
10mM_female	4	9	2536	135	4.13778	2.8	631.19	28.2	51.531	46	-1	302	0	0	3	10	10	0	10	1	1	5	1	1	2	3	4	5	6	7	8	9	10	11	12	5	0
10mM_female	5	1	17323	331	10.9027	7.8	249.372	25.3	99.7841	96	-53	323	0	0	3	10	10	0	10	1	1	5	1	1	2	3	4	5	6	7	8	9	10	11	12	5	0
10mM_female	5	2	12370	341	7.58592	3.8	245.068	29.6	65.63	57	-48	281	0	0	3	10	10	0	10	1	1	5	1	1	2	3	4	5	6	7	8	9	10	11	12	5	0
10mM_female	5	3	858	42	4.38571	2.4	2005.02	56.2	42.2128	36	0	182	0	0	3	10	10	0	10	1	1	5	1	1	2	3	4	5	6	7	8	9	10	11	12	5	0
10mM_female	5	7	4949	204	5.13235	4.1	416.357	35.6	53.6942	50	-1	241	0	0	3	10	10	0	10	1	1	5	1	1	2	3	4	5	6	7	8	9	10	11	12	5	0
10mM_female	5	8	4934	215	4.92744	3.8	395.096	45.4	76.8061	65	0	333	0	0	3	10	10	0	10	1	1	5	1	1	2	3	4	5	6	7	8	9	10	11	12	5	0
10mM_female	5	9	2902	107	5.71963	4.2	794.335	46.6	66.7559	59	-1	264	0	0	3	10	10	0	10	1	1	5	1	1	2	3	4	5	6	7	8	9	10	11	12	5	0
10mM_female	6	1	6963	322	4.64534	3.1	262.862	28.4	59.9394	55	-51	267	0	0	3	10	10	0	10	1	1	5	1	1	2	3	4	5	6	7	8	9	10	11	12	5	0
10mM_female	6	2	12002	572	4.40455	1.6	146.389	13.2	46.5864	39	-51	236	0	0	3	10	10	0	10	1	1	5	1	1	2	3	4	5	6	7	8	9	10	11	12	5	0
10mM_female	6	3	17210	574	6.58014	3.2	143.693	10.4	71.3169	64	-101	297	0	0	3	10	10	0	10	1	1	5	1	1	2	3	4	5	6	7	8	9	10	11	12	5	0
10mM_female	6	7	2294	117	4.18974	2	728.051	40.3	46.3305	38	0	297	0	0	3	10	10	0	10	1	1	5	1	1	2	3	4	5	6	7	8	9	10	11	12	5	0
10mM_female	6	8	725	67	2.38209	1.2	1268.24	244.6	38.9649	30	0	157	0	0	3	10	10	0	10	1	1	5	1	1	2	3	4	5	6	7	8	9	10	11	12	5	0
10mM_female	6	9	1858	76	5.34474	3.1	1116.81	51.6	54.5332	41	0	191	0	0	3	10	10	0	10	1	1	5	1	1	2	3	4	5	6	7	8	9	10	11	12	5	0
10mM_female	1	4	2846	169	3.65444	1.4	504.599	52.1	42.4336	37	-4	226	0	0	3	10	10	0	10	1	1	5	1	1	2	3	4	5	6	7	8	9	10	11	12	5	0
10mM_female	1	5	2299	85	5.76235	3	998.949	91.2	53.2176	45	-1	206	0	0	3	10	10	0	10	1	1	5	1	1	2	3	4	5	6	7	8	9	10	11	12	5	0
10mM_female	1	6	3369	117	6.03248	4.8	726.217	64.5	59.6645	51	-7	265	0	0	3	10	10	0	10	1	1	5	1	1	2	3	4	5	6	7	8	9	10	11	12	5	0
10mM_female	1	10	10799	351	6.6114	3.6	238.86	19.2	87.3466	84	-117	392	0	0	3	10	10	0	10	1	1	5	1	1	2	3	4	5	6	7	8	9	10	11	12	5	0
10mM_female	1	11	3848	145	5.6331	3.4	586.182	27.5	63.4126	54	-40	260	0	0	3	10	10	0	10	1	1	5	1	1	2	3	4	5	6	7	8	9	10	11	12	5	0
10mM_female	1	12	13709	360	8.01667	5.4	231.339	38	70.7839	63	-80	431	0	0	3	10	10	0	10	1	1	5	1	1	2	3	4	5	6	7	8	9	10	11	12	5	0
10mM_female	2	4	1116	99	2.37172	0.8	861.646	128.2	40.4906	37	0	166	0	0	3	10	10	0	10	1	1	5	1	1	2	3	4	5	6	7	8	9	10	11	12	5	0
10mM_female	2	5	0	0	NA	NA	86399.4	86399.4	NA	NA	NA	NA	0	0	3	10	10	0	10	1	1	5	1	1	2	3	4	5	6	7	8	9	10	11	12	5	0
10mM_female	2	6	3039	177	3.90508	2.2	481.507	35.8	31.7034	26	-2	208	0	0	3	10	10	0	10	1	1	5	1	1	2	3	4	5	6	7	8	9	10	11	12	5	0
10mM_female	2	10	14	1	2.8	2.8	43198.3	43198.3	34.0714	33	14	52	0	0	3	10	10	0	10	1	1	5	1	1	2	3	4	5	6	7	8	9	10	11	12	5	0
10mM_female	2	11	3665	210	3.78667	1.8	405.707	69.6	50.9605	45	-5	245	0	0	3	10	10	0	10	1	1	5	1	1	2	3	4	5	6	7	8	9	10	11	12	5	0
10mM_female	2	12	14717	494	6.19757	3	168.359	10.2	76.9026	72	-43	340	0	0	3	10	10	0	10	1	1	5	1	1	2	3	4	5	6	7	8	9	10	11	12	5	0
10mM_female	3	4	4076	394	2.19239	0.8	216.548	20.8	35.9683	29	-7	178	0	0	3	10	10	0	10	1	1	5	1	1	2	3	4	5	6	7	8	9	10	11	12	5	0
10mM_female	3	5	3944	286	3.07413	1	297.983	15.8	34.4402	27	-19	186	0	0	3	10	10	0	10	1	1	5	1	1	2	3	4	5	6	7	8	9	10	11	12	5	0
10mM_female	3	6	11820	624	4.14808	1.2	134.099	6.6	35.9872	31	-54	201	0	0	3	10	10	0	10	1	1	5	1	1	2	3	4	5	6	7	8	9	10	11	12	5	0
10mM_female	3	10	16093	311	10.6277	7	266.33	28.7	86.1784	85	-86	557	0	0	3	10	10	0	10	1	1	5	1	1	2	3	4	5	6	7	8	9	10	11	12	5	0
10mM_female	3	11	4355	108	8.47222	4.4	784.268	149.2	107.503	97	-60	521	0	0	3	10	10	0	10	1	1	5	1	1	2	3	4	5	6	7	8	9	10	11	12	5	0
10mM_female	3	12	5703	174	6.85172	4.9	486.903	65	97.0782	92	-1	320	0	0	3	10	10	0	10	1	1	5	1	1	2	3	4	5	6	7	8	9	10	11	12	5	0
Averages			7195.76	268.818	5.50894	3.30303
