# Supplementary material for: Auxin exposure disrupts feeding behavior and fatty acid metabolism in adult Drosophila
Source: eLife. 2024 Jan 19;12:RP91953. doi: 10.7554/eLife.91953 (PMC10945601; doi:10.7554/eLife.91953)
Supplement: Figure 1—figure supplement 2—source data 3. [file elife-91953-fig1-figsupp2-data3.xlsx]

## Sheet: Oregon-R_0mM_Male
Treatment	DFM	Chamber	Licks	Events	MeanDuration	MedDuration	MeanTimeBtw	MedTimeBtw	MeanInt	MedianInt	MinInt	MaxInt	StartMin	EndMin	BaselineWindowMin	FeedingThreshold	FeedingMinimum	TastingLow	TastingHigh	FeedingMinEvents	TastingMinEvents	SamplesSec	ChamberSize	Ch1	Ch2	Ch3	Ch4	Ch5	Ch6	Ch7	Ch8	Ch9	Ch10	Ch11	Ch12	Link.Gap	PI.Multiplier
0mM_male	1	4	22717	623	7.65811	5	130.815	11.5	80.4179	74	-71	328	0	0	3	10	10	0	10	1	1	5	1	1	2	3	4	5	6	7	8	9	10	11	12	5	0
0mM_male	1	5	13675	645	4.48186	3.6	129.27	25.3	48.4645	44	-1	223	0	0	3	10	10	0	10	1	1	5	1	1	2	3	4	5	6	7	8	9	10	11	12	5	0
0mM_male	1	6	25809	964	5.62593	3.8	83.913	24.6	65.1059	61	0	256	0	0	3	10	10	0	10	1	1	5	1	1	2	3	4	5	6	7	8	9	10	11	12	5	0
0mM_male	1	10	2206	199	2.31558	1	429.693	21.9	53.8702	44	0	388	0	0	3	10	10	0	10	1	1	5	1	1	2	3	4	5	6	7	8	9	10	11	12	5	0
0mM_male	1	11	2792	178	3.29101	2.2	479.406	62.6	63.6299	51	-1	350	0	0	3	10	10	0	10	1	1	5	1	1	2	3	4	5	6	7	8	9	10	11	12	5	0
0mM_male	1	12	958	96	2.13333	1.4	888.604	133.6	48.7881	36	0	277	0	0	3	10	10	0	10	1	1	5	1	1	2	3	4	5	6	7	8	9	10	11	12	5	0
0mM_male	2	4	18126	782	4.84936	3.6	105.501	26.2	67.3416	61	-9	277	0	0	3	10	10	0	10	1	1	5	1	1	2	3	4	5	6	7	8	9	10	11	12	5	0
0mM_male	2	5	7033	452	3.33009	2.2	187.404	42.4	56.451	50	-1	264	0	0	3	10	10	0	10	1	1	5	1	1	2	3	4	5	6	7	8	9	10	11	12	5	0
0mM_male	2	6	11994	610	4.21672	3.2	137.196	6.2	68.7906	59	0	372	0	0	3	10	10	0	10	1	1	5	1	1	2	3	4	5	6	7	8	9	10	11	12	5	0
0mM_male	2	10	3711	184	4.425	2.4	465.136	26.2	63.1823	53	-79	250	0	0	3	10	10	0	10	1	1	5	1	1	2	3	4	5	6	7	8	9	10	11	12	5	0
0mM_male	2	11	3125	180	3.58778	2.3	473.776	45.6	65.2601	54	-1	283	0	0	3	10	10	0	10	1	1	5	1	1	2	3	4	5	6	7	8	9	10	11	12	5	0
0mM_male	2	12	1315	135	2.01926	1.4	633.284	141.1	55.4563	45	0	242	0	0	3	10	10	0	10	1	1	5	1	1	2	3	4	5	6	7	8	9	10	11	12	5	0
0mM_male	3	4	41488	229	10.1802	6.8	90.414	10.8	78.352	73	-66	365	0	0	3	10	10	0	10	1	1	5	1	1	2	3	4	5	6	7	8	9	10	11	12	5	0
0mM_male	3	5	57687	549	8.98072	4.2	50.9009	3.6	60.3611	48	-118	409	0	0	3	10	10	0	10	1	1	5	1	1	2	3	4	5	6	7	8	9	10	11	12	5	0
0mM_male	3	6	13746	407	7.12629	4.6	205.159	22.4	81.6849	75	-66	344	0	0	3	10	10	0	10	1	1	5	1	1	2	3	4	5	6	7	8	9	10	11	12	5	0
0mM_male	3	10	5209	221	4.93575	3.4	384.277	49.6	69.5202	59	-20	336	0	0	3	10	10	0	10	1	1	5	1	1	2	3	4	5	6	7	8	9	10	11	12	5	0
0mM_male	3	11	9142	486	3.98148	2.4	173.44	17.4	66.1454	58	-2	304	0	0	3	10	10	0	10	1	1	5	1	1	2	3	4	5	6	7	8	9	10	11	12	5	0
0mM_male	3	12	4442	335	2.74687	1.6	254.405	25.9	66.0437	55	0	325	0	0	3	10	10	0	10	1	1	5	1	1	2	3	4	5	6	7	8	9	10	11	12	5	0
0mM_male	4	1	1465	99	3.12525	2.2	860.912	117.9	63.658	49	-1	267	0	0	3	10	10	0	10	1	1	5	1	1	2	3	4	5	6	7	8	9	10	11	12	5	0
0mM_male	4	2	3473	245	3.06449	1.4	348.17	78.9	40.6662	30.5	-1	203	0	0	3	10	10	0	10	1	1	5	1	1	2	3	4	5	6	7	8	9	10	11	12	5	0
0mM_male	4	3	3356	217	3.2553	1.8	393.093	58.4	76.893	63	-1	281	0	0	3	10	10	0	10	1	1	5	1	1	2	3	4	5	6	7	8	9	10	11	12	5	0
0mM_male	4	7	58586	452	9.07838	5.4	54.4115	5.4	83.3127	84	-103	420	0	0	3	10	10	0	10	1	1	5	1	1	2	3	4	5	6	7	8	9	10	11	12	5	0
0mM_male	4	8	48223	187	5.81537	4.2	42.2919	4.2	53.1853	49	-29	238	0	0	3	10	10	0	10	1	1	5	1	1	2	3	4	5	6	7	8	9	10	11	12	5	0
0mM_male	4	9	64805	323	8.37716	4	42.4516	3.8	61.4747	49	-115	386	0	0	3	10	10	0	10	1	1	5	1	1	2	3	4	5	6	7	8	9	10	11	12	5	0
0mM_male	5	1	5056	321	3.49034	2.4	264.845	32.7	51.5684	40	-2	257	0	0	3	10	10	0	10	1	1	5	1	1	2	3	4	5	6	7	8	9	10	11	12	5	0
0mM_male	5	2	12	2	1.5	1.5	28799.1	30235.2	19.4	21	4	32	0	0	3	10	10	0	10	1	1	5	1	1	2	3	4	5	6	7	8	9	10	11	12	5	0
0mM_male	5	3	4791	340	3.03529	1.2	250.347	35.4	46.1219	36	-16	247	0	0	3	10	10	0	10	1	1	5	1	1	2	3	4	5	6	7	8	9	10	11	12	5	0
0mM_male	5	7	35194	862	8.80766	5.2	91.3189	4.2	62.3679	60	-84	338	0	0	3	10	10	0	10	1	1	5	1	1	2	3	4	5	6	7	8	9	10	11	12	5	0
0mM_male	5	8	67663	408	8.64352	5.8	43.4101	5.8	57.4952	55	-60	484	0	0	3	10	10	0	10	1	1	5	1	1	2	3	4	5	6	7	8	9	10	11	12	5	0
0mM_male	5	9	66712	454	7.79404	4.6	38.1433	3.8	49.8122	46	-58	336	0	0	3	10	10	0	10	1	1	5	1	1	2	3	4	5	6	7	8	9	10	11	12	5	0
0mM_male	6	1	198	15	2.74667	1.2	5397.45	3287.1	61.699	53	0	176	0	0	3	10	10	0	10	1	1	5	1	1	2	3	4	5	6	7	8	9	10	11	12	5	0
0mM_male	6	2	192	10	3.96	2.4	7850.98	2259	44.4646	36.5	5	158	0	0	3	10	10	0	10	1	1	5	1	1	2	3	4	5	6	7	8	9	10	11	12	5	0
0mM_male	6	3	551	23	4.87826	2	3595.34	1598.2	34.4296	36	4	130	0	0	3	10	10	0	10	1	1	5	1	1	2	3	4	5	6	7	8	9	10	11	12	5	0
0mM_male	6	7	40850	191	7.2675	5	65.0402	8.4	54.0079	49	-42	249	0	0	3	10	10	0	10	1	1	5	1	1	2	3	4	5	6	7	8	9	10	11	12	5	0
0mM_male	6	8	80543	314	9.66678	3.2	38.0736	4	78.3976	58	-178	464	0	0	3	10	10	0	10	1	1	5	1	1	2	3	4	5	6	7	8	9	10	11	12	5	0
0mM_male	6	9	38032	262	6.89012	5.2	66.648	5.8	49.4396	44	-18	391	0	0	3	10	10	0	10	1	1	5	1	1	2	3	4	5	6	7	8	9	10	11	12	5	0
Averages			21853.3	342.8	5.30804	3.20857

## Sheet: Oregon-R_10mM_Male
Treatment	DFM	Chamber	Licks	Events	MeanDuration	MedDuration	MeanTimeBtw	MedTimeBtw	MeanInt	MedianInt	MinInt	MaxInt	StartMin	EndMin	BaselineWindowMin	FeedingThreshold	FeedingMinimum	TastingLow	TastingHigh	FeedingMinEvents	TastingMinEvents	SamplesSec	ChamberSize	Ch1	Ch2	Ch3	Ch4	Ch5	Ch6	Ch7	Ch8	Ch9	Ch10	Ch11	Ch12	Link.Gap	PI.Multiplier
10mM_male	4	4	16280	574	6.0122	4	144.26	16.8	77.8545	79	-75	344	0	0	3	10	10	0	10	1	1	5	1	1	2	3	4	5	6	7	8	9	10	11	12	5	0
10mM_male	4	5	12120	279	9.07527	5.2	299.53	61.2	74.6136	70	-42	329	0	0	3	10	10	0	10	1	1	5	1	1	2	3	4	5	6	7	8	9	10	11	12	5	0
10mM_male	4	6	15175	450	7.18578	4.8	184.815	33.1	75.801	74	-58	325	0	0	3	10	10	0	10	1	1	5	1	1	2	3	4	5	6	7	8	9	10	11	12	5	0
10mM_male	4	10	4726	157	6.32229	5	540.556	75.9	70.5563	64	0	266	0	0	3	10	10	0	10	1	1	5	1	1	2	3	4	5	6	7	8	9	10	11	12	5	0
10mM_male	4	11	5888	445	2.90337	1.2	191.255	27.8	44.006	37	-3	261	0	0	3	10	10	0	10	1	1	5	1	1	2	3	4	5	6	7	8	9	10	11	12	5	0
10mM_male	4	12	4596	160	5.94625	4.4	530.739	77.8	75.1671	61	-8	365	0	0	3	10	10	0	10	1	1	5	1	1	2	3	4	5	6	7	8	9	10	11	12	5	0
10mM_male	5	4	10165	445	4.76764	2.2	188.965	32.1	59.7919	55	-40	256	0	0	3	10	10	0	10	1	1	5	1	1	2	3	4	5	6	7	8	9	10	11	12	5	0
10mM_male	5	5	13838	326	8.88221	5.6	255.366	33.6	75.31	72	-85	274	0	0	3	10	10	0	10	1	1	5	1	1	2	3	4	5	6	7	8	9	10	11	12	5	0
10mM_male	5	6	28245	723	8.24896	4	111.1	9.2	69.9888	63	-69	307	0	0	3	10	10	0	10	1	1	5	1	1	2	3	4	5	6	7	8	9	10	11	12	5	0
10mM_male	5	10	1970	86	4.84419	4.1	988.317	81.4	69.8478	61	0	271	0	0	3	10	10	0	10	1	1	5	1	1	2	3	4	5	6	7	8	9	10	11	12	5	0
10mM_male	5	11	6623	399	3.48772	1.2	212.522	19	57.15	48	-13	225	0	0	3	10	10	0	10	1	1	5	1	1	2	3	4	5	6	7	8	9	10	11	12	5	0
10mM_male	5	12	2380	192	2.63021	1.2	445.053	17.2	53.8721	45	0	191	0	0	3	10	10	0	10	1	1	5	1	1	2	3	4	5	6	7	8	9	10	11	12	5	0
10mM_male	6	4	6979	495	2.94828	1.6	171.252	44.9	49.297	45	0	213	0	0	3	10	10	0	10	1	1	5	1	1	2	3	4	5	6	7	8	9	10	11	12	5	0
10mM_male	6	5	3090	276	2.32246	1.8	309.6	70.6	48.5395	44	-1	177	0	0	3	10	10	0	10	1	1	5	1	1	2	3	4	5	6	7	8	9	10	11	12	5	0
10mM_male	6	6	8866	341	5.44457	2.8	247.204	14.6	61.8952	59	-25	230	0	0	3	10	10	0	10	1	1	5	1	1	2	3	4	5	6	7	8	9	10	11	12	5	0
10mM_male	6	10	3316	382	1.84712	1	223.746	33.4	43.6791	37	-1	177	0	0	3	10	10	0	10	1	1	5	1	1	2	3	4	5	6	7	8	9	10	11	12	5	0
10mM_male	6	11	1286	63	4.2381	1.6	1345.83	101.9	56.6135	52	-1	208	0	0	3	10	10	0	10	1	1	5	1	1	2	3	4	5	6	7	8	9	10	11	12	5	0
10mM_male	6	12	4404	315	3.02159	1.2	271.265	29.8	39.0696	29	-8	185	0	0	3	10	10	0	10	1	1	5	1	1	2	3	4	5	6	7	8	9	10	11	12	5	0
10mM_male	1	1	3919	311	2.63087	1	274.299	13.6	49.9174	42	-1	275	0	0	3	10	10	0	10	1	1	5	1	1	2	3	4	5	6	7	8	9	10	11	12	5	0
10mM_male	1	2	3881	130	6.33077	4.4	653.255	81	58.2085	52	-25	264	0	0	3	10	10	0	10	1	1	5	1	1	2	3	4	5	6	7	8	9	10	11	12	5	0
10mM_male	1	3	4066	243	3.5037	2.2	350.607	13.3	63.0099	48	-3	275	0	0	3	10	10	0	10	1	1	5	1	1	2	3	4	5	6	7	8	9	10	11	12	5	0
10mM_male	1	7	10924	240	9.38083	7.5	349.162	47.8	88.9345	87	-70	298	0	0	3	10	10	0	10	1	1	5	1	1	2	3	4	5	6	7	8	9	10	11	12	5	0
10mM_male	1	8	19794	439	9.48793	5.8	186.896	13.7	79.2936	73	-104	686	0	0	3	10	10	0	10	1	1	5	1	1	2	3	4	5	6	7	8	9	10	11	12	5	0
10mM_male	1	9	1361	53	5.31321	3.4	1594.77	478.1	141.163	125	-18	469	0	0	3	10	10	0	10	1	1	5	1	1	2	3	4	5	6	7	8	9	10	11	12	5	0
10mM_male	2	1	1647	103	3.39612	2.2	827.4	61.6	50.0549	41	-1	239	0	0	3	10	10	0	10	1	1	5	1	1	2	3	4	5	6	7	8	9	10	11	12	5	0
10mM_male	2	2	3174	247	2.67773	1.2	345.718	31.9	53.0841	47	0	254	0	0	3	10	10	0	10	1	1	5	1	1	2	3	4	5	6	7	8	9	10	11	12	5	0
10mM_male	2	3	1004	112	1.87679	1.2	762.736	128.2	45.0704	36	-1	279	0	0	3	10	10	0	10	1	1	5	1	1	2	3	4	5	6	7	8	9	10	11	12	5	0
10mM_male	2	7	10737	382	5.90419	3.4	219.697	21.4	92.5973	88	-71	396	0	0	3	10	10	0	10	1	1	5	1	1	2	3	4	5	6	7	8	9	10	11	12	5	0
10mM_male	2	8	1799	119	3.19328	2	716.828	209	45.8284	40	0	319	0	0	3	10	10	0	10	1	1	5	1	1	2	3	4	5	6	7	8	9	10	11	12	5	0
10mM_male	2	9	13023	503	5.69105	2	165.748	5.8	49.302	42	-60	290	0	0	3	10	10	0	10	1	1	5	1	1	2	3	4	5	6	7	8	9	10	11	12	5	0
10mM_male	3	1	2616	114	4.79825	4	746.55	50.8	83.6662	75	-1	333	0	0	3	10	10	0	10	1	1	5	1	1	2	3	4	5	6	7	8	9	10	11	12	5	0
10mM_male	3	2	3721	163	4.90429	3	521.956	34.6	67.9657	62	-1	268	0	0	3	10	10	0	10	1	1	5	1	1	2	3	4	5	6	7	8	9	10	11	12	5	0
10mM_male	3	3	3051	132	4.86364	3.5	644.798	31.8	77.4277	69	-2	262	0	0	3	10	10	0	10	1	1	5	1	1	2	3	4	5	6	7	8	9	10	11	12	5	0
10mM_male	3	7	7870	226	7.23894	4.8	373.411	40.4	121.716	113	-2	459	0	0	3	10	10	0	10	1	1	5	1	1	2	3	4	5	6	7	8	9	10	11	12	5	0
10mM_male	3	8	10350	226	9.45929	6.8	371.2	68.6	101.562	96	-70	429	0	0	3	10	10	0	10	1	1	5	1	1	2	3	4	5	6	7	8	9	10	11	12	5	0
10mM_male	3	9	5411	183	6.17814	4.2	463.422	76	72.5433	67	-38	380	0	0	3	10	10	0	10	1	1	5	1	1	2	3	4	5	6	7	8	9	10	11	12	5	0
Averages			7174.86	278.722	5.19326	3.20833
