# Supplementary material for: Auxin exposure disrupts feeding behavior and fatty acid metabolism in adult Drosophila
Source: eLife. 2024 Jan 19;12:RP91953. doi: 10.7554/eLife.91953 (PMC10945601; doi:10.7554/eLife.91953)
Supplement: Figure 1—source data 1. [file elife-91953-fig1-data1.xlsx]

## Sheet: Sheet1
Chemical	stock conc in mM	Final ml of 4mMsucrose, 1.5mM yeast extract test solution/day	Final Auxin concentration	ml of 500mM Auxin	ml of 1 mM NaOH	ml of water	ml of 16mM sucrose, 6mM yeast extract												final % NaOH		%NAOH contributed by E E	how much more do we need?
Auxin	500	10	0	0	1	6.5	2.5												0.01		0	0.1
stock made with	water	10	5	0.1	0.99	6.41	2.5												0.01		0.0001	0.0999
	enter 'water' or solvent name	10	10	0.2	0.98	6.32	2.5												0.01		0.0002	0.0998
number of days	2	10	20	0.4	0.96	6.14	2.5												0.01		0.0004	0.0996
		10	30	0.6	0.94	5.96	2.5												0.01		0.0006	0.0994
number of replicates	6	10	45	0.9	0.91	5.69	2.5												0.01		0.0009	0.0991
		10	60	1.2	0.88	5.42	2.5												0.01		0.0012	0.0988
number of blue samples	0	10	75	1.5	0.85	5.15	2.5												0.01		0.0015	0.85
		10	90	1.8	0.82	4.88	2.5												0.01		0.0018	0.82
		10	125	2.5	0.75	4.25	2.5												0.01		0.0025	0.0075
		10	350	7	0.3	0.2	2.5
		# of treatments to be tested	11	total NaOH stock:	9.08
		To make solutions on Day 1:					Blue Treatment Vials:
16.2	ml of auxin/day	Add water in column F Add yeast sucrose volume in column G					Second set to be removed at 24 hrs: Label & place in freezer
27.5	ml of 8mM S, 3mM YE/day	Add chemical in column E Mix and remove amount for blue sample (Column H)					Thom will take photographs
		Add water in column I to the undyed sample Add blue dye in column J to the Blue dye sample
66	VIALS OF EACH SEX NEEDED	Mix each tube and add 0.75 ml of the appropriate solution to each treatment vial
THIS EXPERIMENT WAS DONE USING SOUTHALL #92470 FLIES
sample #	sex	treatment	Total Flies at start	# dead at 24 hr	# dead at 48 hr	# live at 48 hr	Total flies at end	total at start = total end?	% Effected		Females				Males					Male			Female
1	M	0_mM_Auxin_0.01%NaOH_control	20	0	0	20	20	yes	0		(mM)	Starting number	Number dead		(mM)	Starting number	Number dead			Average	SD	N	Average	SD	N
2	F	0_mM_Auxin_0.01%NaOH_control	20	0	0	20	20	yes	0		0	20	0		0	20	0		0 mM	0	0	6	0	0	6
3	M	0_mM_Auxin_0.01%NaOH_control	19	0	0	19	19	yes	0		0	19	0		0	19	0		2 mM	0.833333	0	6	0	0	6
4	F	0_mM_Auxin_0.01%NaOH_control	19	0	0	19	19	yes	0		0	20	0		0	20	0		4 mM	0	0	6	0	0	6
5	M	0_mM_Auxin_0.01%NaOH_control	20	0	0	20	20	yes	0		0	20	0		0	17	0		6 mM	0	0	6	0.877193	2.14868	6
6	F	0_mM_Auxin_0.01%NaOH_control	20	0	0	20	20	yes	0		0	20	0		0	20	0		10 mM	5.04386	7.74671	6	3.33333	8.16497	6
7	M	0_mM_Auxin_0.01%NaOH_control	17	0	0	17	17	yes	0		0	20	0		0	18	0		15 mM	61.5351	16.4135	6	6.84211	5.3051	6
8	F	0_mM_Auxin_0.01%NaOH_control	20	0	0	20	20	yes	0		5	18	0		5	20	0		20 mM	84.8485	37.1135	6	21.0185	38.9815	6
9	M	0_mM_Auxin_0.01%NaOH_control	20	0	0	20	20	yes	0		5	20	0		5	20	0		25 mM	92.8638	8.67257	6	15.2812	10.6074	6
10	F	0_mM_Auxin_0.01%NaOH_control	20	0	0	20	20	yes	0		5	19	0		5	19	0		90 mM	99.1667	2.04124	6	16.0526	9.63316	6
11	M	0_mM_Auxin_0.01%NaOH_control	18	0	0	18	18	yes	0		5	20	0		5	20	0		125 mM	97.3684	6.44603	6	16.3889	6.79279	6
12	F	0_mM_Auxin_0.01%NaOH_control	20	0	0	20	20	yes	0		5	20	0		5	19	0		350 mM	100	0	6	48.9035	10.482	6
13	M	5_mM_Auxin	20	0	0	20	20	yes	0		5	20	0		5	20	1
14	F	5_mM_Auxin	18	0	0	18	18	yes	0		10	19	0		10	20	0
15	M	5_mM_Auxin	20	0	0	20	20	yes	0		10	20	0		10	20	0
16	F	5_mM_Auxin	20	0	0	20	20	yes	0		10	18	0		10	20	0
17	M	5_mM_Auxin	19	0	0	19	19	yes	0		10	19	0		10	18	0
18	F	5_mM_Auxin	19	0	0	19	19	yes	0		10	20	0		10	20	0
19	M	5_mM_Auxin	20	0	0	20	20	yes	0		10	20	0		10	20	0
20	F	5_mM_Auxin	20	0	0	20	20	yes	0		20	20	0		20	20	0
21	M	5_mM_Auxin	19	0	0	19	19	yes	0		20	19	1		20	19	0
22	F	5_mM_Auxin	20	0	0	20	20	yes	0		20	20	0		20	20	0
23	M	5_mM_Auxin	20	0	1	19	19	no	5		20	20	0		20	20	0
24	F	5_mM_Auxin	20	0	0	20	20	yes	0		20	20	0		20	20	0
25	M	10_mM_Auxin	20	0	0	20	20	yes	0		20	20	0		20	19	0
26	F	10_mM_Auxin	19	0	0	19	19	yes	0		30	19	0		30	19	1
27	M	10_mM_Auxin	20	0	0	20	20	yes	0		30	20	4		30	19	0
28	F	10_mM_Auxin	20	0	0	20	20	yes	0		30	20	0		30	19	0
29	M	10_mM_Auxin	20	0	0	20	20	yes	0		30	20	0		30	20	0
30	F	10_mM_Auxin	18	0	0	18	18	yes	0		30	20	0		30	20	4
31	M	10_mM_Auxin	18	0	0	18	18	yes	0		30	19	0		30	20	1
32	F	10_mM_Auxin	19	0	0	19	19	yes	0		45	20	0		45	20	8
33	M	10_mM_Auxin	20	0	0	20	20	yes	0		45	20	2		45	20	11
34	F	10_mM_Auxin	20	0	0	20	20	yes	0		45	19	2		45	20	10
35	M	10_mM_Auxin	20	0	0	20	20	yes	0		45	19	0		45	20	15
36	F	10_mM_Auxin	20	0	0	20	20	yes	0		45	20	2		45	20	13
37	M	20_mM_Auxin	20	0	0	20	20	yes	0		45	19	2		45	19	16
38	F	20_mM_Auxin	20	0	0	20	20	yes	0		60	20	2		60	220	20
39	M	20_mM_Auxin	19	0	0	19	19	yes	0		60	18	0		60	19	19
40	F	20_mM_Auxin	19	0	1	18	18	no	5.26316		60	18	2		60	19	19
41	M	20_mM_Auxin	20	0	0	20	20	yes	0		60	20	0		60	19	19
42	F	20_mM_Auxin	20	0	0	20	20	yes	0		60	20	1		60	19	19
43	M	20_mM_Auxin	20	0	0	20	20	yes	0		60	19	19		60	20	20
44	F	20_mM_Auxin	20	0	0	20	20	yes	0		75	19	3		75	20	20
45	M	20_mM_Auxin	20	0	0	20	20	yes	0		75	17	4		75	17	15
46	F	20_mM_Auxin	20	0	0	20	20	yes	0		75	19	5		75	18	18
47	M	20_mM_Auxin	19	0	0	19	19	yes	0		75	19	4		75	20	20
48	F	20_mM_Auxin	20	0	0	20	20	yes	0		75	20	1		75	19	15
49	M	30_mM_Auxin	19	0	1	18	18	no	5.26316		75	20	0		75	20	18
50	F	30_mM_Auxin	19	0	0	19	19	yes	0		90	20	5		90	20	20
51	M	30_mM_Auxin	19	0	0	19	19	yes	0		90	19	3		90	19	19
52	F	30_mM_Auxin	20	0	4	16	16	no	20		90	20	2		90	18	18
53	M	30_mM_Auxin	19	0	0	19	19	yes	0		90	20	1		90	19	19
54	F	30_mM_Auxin	20	0	0	20	20	yes	0		90	19	2		90	20	19
55	M	30_mM_Auxin	20	0	0	20	20	yes	0		90	20	6		90	20	20
56	F	30_mM_Auxin	20	0	0	20	20	yes	0		125	18	2		125	20	20
57	M	30_mM_Auxin	20	0	4	16	16	no	20		125	20	2		125	20	20
58	F	30_mM_Auxin	20	0	0	20	20	yes	0		125	18	4		125	20	20
59	M	30_mM_Auxin	20	0	1	19	19	no	5		125	20	2		125	19	16
60	F	30_mM_Auxin	19	0	0	19	19	yes	0		125	20	4		125	19	19
61	M	45_mM_Auxin	20	2	8	12	12	no	40		125	20	5		125	19	19
62	F	45_mM_Auxin	20	0	0	20	20	yes	0		350	20	6		350	19	19
63	M	45_mM_Auxin	20	0	11	9	9	no	55		350	19	11		350	20	20
64	F	45_mM_Auxin	20	1	2	18	18	no	10		350	20	10		350	20	20
65	M	45_mM_Auxin	20	2	10	10	10	no	50		350	19	10		350	20	20
66	F	45_mM_Auxin	19	0	2	17	17	no	10.5263		350	19	11		350	20	20
67	M	45_mM_Auxin	20	0	15	5	5	no	75		350	20	9		350	20	20
68	F	45_mM_Auxin	19	0	0	19	19	yes	0
69	M	45_mM_Auxin	20	0	13	7	7	no	65
70	F	45_mM_Auxin	20	0	2	18	18	no	10
71	M	45_mM_Auxin	19	0	16	3	3	no	84.2105
72	F	45_mM_Auxin	19	0	2	17	17	no	10.5263
73	M	60_mM_Auxin	220	0	20	200	200	no	9.09091
74	F	60_mM_Auxin	20	0	2	18	18	no	10
75	M	60_mM_Auxin	19	3	19	0	0	no	100
76	F	60_mM_Auxin	18	0	0	18	18	yes	0
77	M	60_mM_Auxin	19	1	19	0	0	no	100
78	F	60_mM_Auxin	18	1	2	16	16	no	11.1111
79	M	60_mM_Auxin	19	1	19	0	0	no	100
80	F	60_mM_Auxin	20	0	0	20	20	yes	0
81	M	60_mM_Auxin	19	1	19	0	0	no	100
82	F	60_mM_Auxin	20	0	1	19	19	no	5
83	M	60_mM_Auxin	20	3	20	0	0	no	100
84	F	60_mM_Auxin	19	0	19	0	0	no	100
85	M	75_mM_Auxin	20	0	20	0	0	no	100
86	F	75_mM_Auxin	19	1	3	16	16	no	15.7895
87	M	75_mM_Auxin	17	2	15	2	2	no	88.2353
88	F	75_mM_Auxin	17	2	4	13	13	no	23.5294
89	M	75_mM_Auxin	18	0	18	0	0	no	100
90	F	75_mM_Auxin	19	0	5	14	14	no	26.3158
91	M	75_mM_Auxin	20	0	20	0	0	no	100
92	F	75_mM_Auxin	19	1	4	15	15	no	21.0526
93	M	75_mM_Auxin	19	0	15	4	4	no	78.9474
94	F	75_mM_Auxin	20	0	1	19	19	no	5
95	M	75_mM_Auxin	20	0	18	2	2	no	90
96	F	75_mM_Auxin	20	0	0	20	20	yes	0
97	M	90_mM_Auxin	20	2	20	0	0	no	100
98	F	90_mM_Auxin	20	0	5	15	15	no	25
99	M	90_mM_Auxin	19	0	19	0	0	no	100
100	F	90_mM_Auxin	19	0	3	16	16	no	15.7895
101	M	90_mM_Auxin	18	2	18	0	0	no	100
102	F	90_mM_Auxin	20	0	2	18	18	no	10
103	M	90_mM_Auxin	19	2	19	0	0	no	100
104	F	90_mM_Auxin	20	0	1	19	19	no	5
105	M	90_mM_Auxin	20	0	19	1	1	no	95
106	F	90_mM_Auxin	19	0	2	17	17	no	10.5263
107	M	90_mM_Auxin	20	0	20	0	0	no	100
108	F	90_mM_Auxin	20	0	6	14	14	no	30
109	M	125_mM_Auxin	20	0	20	0	0	no	100
110	F	125_mM_Auxin	18	0	2	16	16	no	11.1111
111	M	125_mM_Auxin	20	0	20	0	0	no	100
112	F	125_mM_Auxin	20	0	2	18	18	no	10
113	M	125_mM_Auxin	20	1	20	0	0	no	100
114	F	125_mM_Auxin	18	0	4	14	14	no	22.2222
115	M	125_mM_Auxin	19	0	16	3	3	no	84.2105
116	F	125_mM_Auxin	20	1	2	18	18	no	10
117	M	125_mM_Auxin	19	1	19	0	0	no	100
118	F	125_mM_Auxin	20	2	4	16	16	no	20
119	M	125_mM_Auxin	19	2	19	0	0	no	100
120	F	125_mM_Auxin	20	1	5	15	15	no	25
121	M	350_mM_Auxin	19	5	19	0	0	no	100
122	F	350_mM_Auxin	20	1	6	14	14	no	30
123	M	350_mM_Auxin	20	3	20	0	0	no	100
124	F	350_mM_Auxin	19	4	11	8	8	no	57.8947
125	M	350_mM_Auxin	20	1	20	0	0	no	100
126	F	350_mM_Auxin	20	1	10	10	10	no	50
127	M	350_mM_Auxin	20	3	20	0	0	no	100
128	F	350_mM_Auxin	19	1	10	9	9	no	52.6316
129	M	350_mM_Auxin	20	1	20	0	0	no	100
130	F	350_mM_Auxin	19	2	11	8	8	no	57.8947
131	M	350_mM_Auxin	20	1	20	0	0	no	100
132	F	350_mM_Auxin	20	2	9	11	11	no	45
