# Supplementary material for: Auxin exposure disrupts feeding behavior and fatty acid metabolism in adult Drosophila
Source: eLife. 2024 Jan 19;12:RP91953. doi: 10.7554/eLife.91953 (PMC10945601; doi:10.7554/eLife.91953)
Supplement: Figure 1—source data 2. [file elife-91953-fig1-data2.xlsx]

## Sheet: Sheet1
Chemical	stock conc in mM	Final ml of 4mMsucrose, 1.5mM yeast extract test solution/day	Final Auxin concentration	ml of 500mM Auxin	ml of 1 mM NaOH	ml of water	ml of 16mM sucrose, 6mM yeast extract												final % NaOH		%NAOH contributed by E E	how much more do we need?
Auxin	500	10	0	0	1	6.5	2.5												0.01		0	0.1
stock made with	water	10	5	0.1	0.99	6.41	2.5												0.01		0.0001	0.0999
	enter 'water' or solvent name	10	10	0.2	0.98	6.32	2.5												0.01		0.0002	0.0998
number of days	2	10	20	0.4	0.96	6.14	2.5												0.01		0.0004	0.0996
		10	30	0.6	0.94	5.96	2.5												0.01		0.0006	0.0994
number of replicates	6	10	45	0.9	0.91	5.69	2.5												0.01		0.0009	0.0991
		10	60	1.2	0.88	5.42	2.5												0.01		0.0012	0.0988
number of blue samples	0	10	75	1.5	0.85	5.15	2.5												0.01		0.0015	0.85
		10	90	1.8	0.82	4.88	2.5												0.01		0.0018	0.82
		10	125	2.5	0.75	4.25	2.5												0.01		0.0025	0.0075
		10	350	7	0.3	0.2	2.5
		# of treatments to be tested	11	total NaOH stock:	9.08
		To make solutions on Day 1:
16.2	ml of auxin/day	Add water in column F Add yeast sucrose volume in column G
27.5	ml of 8mM S, 3mM YE/day	Add chemical in column E Mix and remove amount for blue sample (Column H)
		Add water in column I to the undyed sample Add blue dye in column J to the Blue dye sample
66	VIALS OF EACH SEX NEEDED	Mix each tube and add 0.75 ml of the appropriate solution to each treatment vial
THIS EXPERIMENT WAS DONE USING VK00040 FLIES
sample #	sex	treatment	Total Flies at start	# dead at 24 hr	# dead at 48 hr	# live at 48 hr	Total flies at end	total at start = total end?	% Effected		Females				Males					Male			Female
1	M	0_mM_Auxin_0.01%NaOH_control	20	0	0	20	20	yes	0		(mM)	Starting number	Number dead		(mM)	Starting number	Number dead			Average	SD	N	Average	SD	N
2	F	0_mM_Auxin_0.01%NaOH_control	20	0	0	20	20	yes	0		0	20	0		0	20	0		0 mM	0	0	6	0.877193	2.14868	6
3	M	0_mM_Auxin_0.01%NaOH_control	20	0	0	20	20	yes	0		0	20	0		0	20	0		5 mM	0.877193	0	6	0	0	6
4	F	0_mM_Auxin_0.01%NaOH_control	20	0	0	20	20	yes	0		0	18	0		0	20	0		10 mM	0	0	6	0	0	6
5	M	0_mM_Auxin_0.01%NaOH_control	20	0	0	20	20	yes	0		0	20	0		0	20	0		20 mM	10.7143	10.8397	6	25	13.0384	6
6	F	0_mM_Auxin_0.01%NaOH_control	18	0	0	18	18	yes	0		0	20	0		0	20	0		30 mM	91.6667	9.30949	6	60	14.8324	6
7	M	0_mM_Auxin_0.01%NaOH_control	20	0	0	20	20	yes	0		0	19	1		0	20	0		45 mM	99.1667	2.04124	6	64.6491	8.65732	6
8	F	0_mM_Auxin_0.01%NaOH_control	20	0	0	20	20	yes	0		5	20	0		5	20	0		60 mM	100	0	6	82.2807	8.21064	6
9	M	0_mM_Auxin_0.01%NaOH_control	20	0	0	20	20	yes	0		5	20	0		5	20	0		75 mM	100	0	6	91.5789	5.20228	6
10	F	0_mM_Auxin_0.01%NaOH_control	20	0	0	20	20	yes	0		5	20	0		5	20	0		90 mM	99.1667	2.04124	6	95.653	3.81808	6
11	M	0_mM_Auxin_0.01%NaOH_control	20	0	0	20	20	yes	0		5	20	0		5	19	0		125 mM	100	0	6	93.9425	2.20037	6
12	F	0_mM_Auxin_0.01%NaOH_control	19	0	1	18	18	no	5.26316		5	20	0		5	19	1		350 mM	100	0	6	99.1667	2.04124	6
13	M	5_mM_Auxin	20	0	0	20	20	yes	0		5	20	0		5	19	0
14	F	5_mM_Auxin	20	0	0	20	20	yes	0		10	20	0		10	20	0
15	M	5_mM_Auxin	20	0	0	20	20	yes	0		10	20	0		10	20	0
16	F	5_mM_Auxin	20	0	0	20	20	yes	0		10	20	0		10	20	0
17	M	5_mM_Auxin	20	0	0	20	20	yes	0		10	20	0		10	19	0
18	F	5_mM_Auxin	20	0	0	20	20	yes	0		10	20	0		10	20	0
19	M	5_mM_Auxin	19	0	0	19	19	yes	0		10	20	0		10	20	0
20	F	5_mM_Auxin	20	0	0	20	20	yes	0		20	20	7		20	20	0
21	M	5_mM_Auxin	19	0	1	18	18	no	5.26316		20	20	3		20	20	1
22	F	5_mM_Auxin	20	0	0	20	20	yes	0		20	20	7		20	20	5
23	M	5_mM_Auxin	19	0	0	19	19	yes	0		20	20	2		20	20	5
24	F	5_mM_Auxin	20	0	0	20	20	yes	0		20	20	3		20	20	3
25	M	10_mM_Auxin	20	0	0	20	20	yes	0		20	20	8		20	20	1
26	F	10_mM_Auxin	20	0	0	20	20	yes	0		30	20	12		30	20	20
27	M	10_mM_Auxin	20	0	0	20	20	yes	0		30	20	15		30	20	18
28	F	10_mM_Auxin	20	0	0	20	20	yes	0		30	20	15		30	20	18
29	M	10_mM_Auxin	20	0	0	20	20	yes	0		30	20	11		30	20	20
30	F	10_mM_Auxin	20	0	0	20	20	yes	0		30	20	12		30	20	15
31	M	10_mM_Auxin	19	0	0	19	19	yes	0		30	20	7		30	20	19
32	F	10_mM_Auxin	20	0	0	20	20	yes	0		45	20	13		45	20	20
33	M	10_mM_Auxin	20	0	0	20	20	yes	0		45	20	13		45	20	20
34	F	10_mM_Auxin	20	0	0	20	20	yes	0		45	20	13		45	20	20
35	M	10_mM_Auxin	20	0	0	20	20	yes	0		45	20	16		45	20	20
36	F	10_mM_Auxin	20	0	0	20	20	yes	0		45	20	11		45	20	19
37	M	20_mM_Auxin	20	0	0	20	20	yes	0		45	19	11		45	19	19
38	F	20_mM_Auxin	20	3	7	13	13	no	35		60	20	15		60	19	19
39	M	20_mM_Auxin	20	0	1	19	19	no	5		60	20	16		60	20	20
40	F	20_mM_Auxin	20	3	3	17	17	no	15		60	19	15		60	20	20
41	M	20_mM_Auxin	20	3	5	15	15	no	25		60	19	18		60	20	20
42	F	20_mM_Auxin	20	2	7	13	13	no	35		60	20	15		60	20	20
43	M	20_mM_Auxin	20	0	5	15	15	no	25		60	20	18		60	20	20
44	F	20_mM_Auxin	20	0	2	18	18	no	10		75	20	19		75	20	20
45	M	20_mM_Auxin	20	0	3	17	17	no	15		75	20	18		75	20	20
46	F	20_mM_Auxin	20	1	3	17	17	no	15		75	19	17		75	19	19
47	M	20_mM_Auxin	20	0	1	19	19	no	5		75	20	17		75	20	20
48	F	20_mM_Auxin	20	3	8	12	12	no	40		75	20	18		75	19	19
49	M	30_mM_Auxin	20	1	20	0	0	no	100		75	20	20		75	20	20
50	F	30_mM_Auxin	20	2	12	8	8	no	60		90	20	20		90	20	20
51	M	30_mM_Auxin	20	1	18	2	2	no	90		90	20	20		90	20	19
52	F	30_mM_Auxin	20	6	15	5	5	no	75		90	20	18		90	20	20
53	M	30_mM_Auxin	20	2	18	2	2	no	90		90	19	18		90	20	20
54	F	30_mM_Auxin	20	5	15	5	5	no	75		90	19	18		90	17	17
55	M	30_mM_Auxin	20	0	20	0	0	no	100		90	18	17		90	20	20
56	F	30_mM_Auxin	20	1	11	9	9	no	55		125	18	17		125	20	20
57	M	30_mM_Auxin	20	2	15	5	5	no	75		125	20	19		125	20	20
58	F	30_mM_Auxin	20	2	12	8	8	no	60		125	19	18		125	20	20
59	M	30_mM_Auxin	20	0	19	1	1	no	95		125	20	19		125	20	20
60	F	30_mM_Auxin	20	0	7	13	13	no	35		125	20	19		125	20	20
61	M	45_mM_Auxin	20	6	20	0	0	no	100		125	19	17		125	20	20
62	F	45_mM_Auxin	20	3	13	7	7	no	65		350	20	19		350	20	20
63	M	45_mM_Auxin	20	3	20	0	0	no	100		350	18	18		350	20	20
64	F	45_mM_Auxin	20	3	13	7	7	no	65		350	19	19		350	20	20
65	M	45_mM_Auxin	20	2	20	0	0	no	100		350	18	18		350	20	20
66	F	45_mM_Auxin	20	3	13	7	7	no	65		350	18	18		350	20	20
67	M	45_mM_Auxin	20	2	20	0	0	no	100		350	20	20		350	20	20
68	F	45_mM_Auxin	20	0	16	4	4	no	80
69	M	45_mM_Auxin	20	1	19	1	1	no	95
70	F	45_mM_Auxin	20	1	11	9	9	no	55
71	M	45_mM_Auxin	19	5	19	0	0	no	100
72	F	45_mM_Auxin	19	4	11	8	8	no	57.8947
73	M	60_mM_Auxin	19	5	19	0	0	no	100
74	F	60_mM_Auxin	20	3	15	5	5	no	75
75	M	60_mM_Auxin	20	6	20	0	0	no	100
76	F	60_mM_Auxin	20	3	16	4	4	no	80
77	M	60_mM_Auxin	20	3	20	0	0	no	100
78	F	60_mM_Auxin	19	6	15	4	4	no	78.9474
79	M	60_mM_Auxin	20	3	20	0	0	no	100
80	F	60_mM_Auxin	19	13	18	1	1	no	94.7368
81	M	60_mM_Auxin	20	3	20	0	0	no	100
82	F	60_mM_Auxin	20	4	15	5	5	no	75
83	M	60_mM_Auxin	20	2	20	0	0	no	100
84	F	60_mM_Auxin	20	2	18	2	2	no	90
85	M	75_mM_Auxin	20	2	20	0	0	no	100
86	F	75_mM_Auxin	20	4	19	1	1	no	95
87	M	75_mM_Auxin	20	6	20	0	0	no	100
88	F	75_mM_Auxin	20	6	18	2	2	no	90
89	M	75_mM_Auxin	19	8	19	0	0	no	100
90	F	75_mM_Auxin	19	6	17	2	2	no	89.4737
91	M	75_mM_Auxin	20	4	20	0	0	no	100
92	F	75_mM_Auxin	20	5	17	3	3	no	85
93	M	75_mM_Auxin	19	1	19	0	0	no	100
94	F	75_mM_Auxin	20	4	18	2	2	no	90
95	M	75_mM_Auxin	20	3	20	0	0	no	100
96	F	75_mM_Auxin	20	5	20	0	0	no	100
97	M	90_mM_Auxin	20	7	20	0	0	no	100
98	F	90_mM_Auxin	20	8	20	0	0	no	100
99	M	90_mM_Auxin	20	3	19	1	1	no	95
100	F	90_mM_Auxin	20	6	20	0	0	no	100
101	M	90_mM_Auxin	20	6	20	0	0	no	100
102	F	90_mM_Auxin	20	6	18	2	2	no	90
103	M	90_mM_Auxin	20	7	20	0	0	no	100
104	F	90_mM_Auxin	19	9	18	1	1	no	94.7368
105	M	90_mM_Auxin	17	0	17	0	0	no	100
106	F	90_mM_Auxin	19	5	18	1	1	no	94.7368
107	M	90_mM_Auxin	20	4	20	0	0	no	100
108	F	90_mM_Auxin	18	6	17	1	1	no	94.4444
109	M	125_mM_Auxin	20	4	20	0	0	no	100
110	F	125_mM_Auxin	18	4	17	1	1	no	94.4444
111	M	125_mM_Auxin	20	16	20	0	0	no	100
112	F	125_mM_Auxin	20	7	19	1	1	no	95
113	M	125_mM_Auxin	20	11	20	0	0	no	100
114	F	125_mM_Auxin	19	5	18	1	1	no	94.7368
115	M	125_mM_Auxin	20	5	20	0	0	no	100
116	F	125_mM_Auxin	20	7	19	1	1	no	95
117	M	125_mM_Auxin	20	3	20	0	0	no	100
118	F	125_mM_Auxin	20	8	19	1	1	no	95
119	M	125_mM_Auxin	20	4	20	0	0	no	100
120	F	125_mM_Auxin	19	7	17	2	2	no	89.4737
121	M	350_mM_Auxin	20	11	20	0	0	no	100
122	F	350_mM_Auxin	20	9	19	1	1	no	95
123	M	350_mM_Auxin	20	15	20	0	0	no	100
124	F	350_mM_Auxin	18	15	18	0	0	no	100
125	M	350_mM_Auxin	20	6	20	0	0	no	100
126	F	350_mM_Auxin	19	13	19	0	0	no	100
127	M	350_mM_Auxin	20	8	20	0	0	no	100
128	F	350_mM_Auxin	18	10	18	0	0	no	100
129	M	350_mM_Auxin	20	13	20	0	0	no	100
130	F	350_mM_Auxin	18	13	18	0	0	no	100
131	M	350_mM_Auxin	20	16	20	0	0	no	100
132	F	350_mM_Auxin	20	6	20	0	0	no	100
