# Supplementary material for: Auxin exposure disrupts feeding behavior and fatty acid metabolism in adult Drosophila
Source: eLife. 2024 Jan 19;12:RP91953. doi: 10.7554/eLife.91953 (PMC10945601; doi:10.7554/eLife.91953)
Supplement: Figure 1—source data 3. [file elife-91953-fig1-data3.xlsx]

## Sheet: VK00040_0mM_Female
Treatment	DFM	Chamber	Licks	Events	MeanDuration	MedDuration	MeanTimeBtw	MedTimeBtw	MeanInt	MedianInt	MinInt	MaxInt	StartMin	EndMin	BaselineWindowMin	FeedingThreshold	FeedingMinimum	TastingLow	TastingHigh	FeedingMinEvents	TastingMinEvents	SamplesSec	ChamberSize	Ch1	Ch2	Ch3	Ch4	Ch5	Ch6	Ch7	Ch8	Ch9	Ch10	Ch11	Ch12	Link.Gap	PI.Multiplier
0mM_female	1	1	3065	142	4.4493	2.4	599.776	80.2	73.3412	58	-2	351	0	0	3	10	10	0	10	1	1	5	1	1	2	3	4	5	6	7	8	9	10	11	12	5	0
0mM_female	1	2	99	28	0.792857	0.5	2978.54	1265.4	26.8468	20	0	91	0	0	3	10	10	0	10	1	1	5	1	1	2	3	4	5	6	7	8	9	10	11	12	5	0
0mM_female	1	3	1187	115	2.18261	1.2	742.662	143	65.2972	42	-1	342	0	0	3	10	10	0	10	1	1	5	1	1	2	3	4	5	6	7	8	9	10	11	12	5	0
0mM_female	1	7	2644	208	2.85769	2	410.552	59.2	43.9687	31	0	336	0	0	3	10	10	0	10	1	1	5	1	1	2	3	4	5	6	7	8	9	10	11	12	5	0
0mM_female	1	8	1274	163	1.68466	0.8	525.154	93.3	48.5484	33	0	335	0	0	3	10	10	0	10	1	1	5	1	1	2	3	4	5	6	7	8	9	10	11	12	5	0
0mM_female	1	9	2212	224	2.30982	1.2	381.7	32.8	43.7909	33	-1	250	0	0	3	10	10	0	10	1	1	5	1	1	2	3	4	5	6	7	8	9	10	11	12	5	0
0mM_female	2	1	17313	744	4.94382	3.4	111.035	22	66.6805	63	-13	331	0	0	3	10	10	0	10	1	1	5	1	1	2	3	4	5	6	7	8	9	10	11	12	5	0
0mM_female	2	2	9966	435	4.76552	3.2	193.41	24.2	87.5262	83	0	376	0	0	3	10	10	0	10	1	1	5	1	1	2	3	4	5	6	7	8	9	10	11	12	5	0
0mM_female	2	3	7488	407	3.91646	2.4	207.857	30.2	60.6414	49	-1	277	0	0	3	10	10	0	10	1	1	5	1	1	2	3	4	5	6	7	8	9	10	11	12	5	0
0mM_female	2	7	8103	263	6.81293	4.6	320.484	23.3	69.3344	62	-32	282	0	0	3	10	10	0	10	1	1	5	1	1	2	3	4	5	6	7	8	9	10	11	12	5	0
0mM_female	2	8	1416	136	2.28088	1.4	628.39	90.6	40.8072	30	0	275	0	0	3	10	10	0	10	1	1	5	1	1	2	3	4	5	6	7	8	9	10	11	12	5	0
0mM_female	2	9	1	1	0.2	0.2	43199.7	43199.7	24	24	24	24	0	0	3	10	10	0	10	1	1	5	1	1	2	3	4	5	6	7	8	9	10	11	12	5	0
0mM_female	3	1	15983	478	7.18117	2.8	173.211	14.2	75.4525	63	-96	523	0	0	3	10	10	0	10	1	1	5	1	1	2	3	4	5	6	7	8	9	10	11	12	5	0
0mM_female	3	2	14407	388	7.81082	2.5	214.319	8.2	52.1382	36	-84	338	0	0	3	10	10	0	10	1	1	5	1	1	2	3	4	5	6	7	8	9	10	11	12	5	0
0mM_female	3	3	16347	459	7.74466	3	180.492	8.8	47.068	27	-121	550	0	0	3	10	10	0	10	1	1	5	1	1	2	3	4	5	6	7	8	9	10	11	12	5	0
0mM_female	3	7	2722	59	9.62373	3.2	1430.55	207.9	76.8855	30	-48	376	0	0	3	10	10	0	10	1	1	5	1	1	2	3	4	5	6	7	8	9	10	11	12	5	0
0mM_female	3	8	7205	205	7.58537	3.6	411.872	24.1	66.0085	48	-23	462	0	0	3	10	10	0	10	1	1	5	1	1	2	3	4	5	6	7	8	9	10	11	12	5	0
0mM_female	3	9	5058	239	4.5523	3.6	355.469	38.9	77.1937	68	-47	328	0	0	3	10	10	0	10	1	1	5	1	1	2	3	4	5	6	7	8	9	10	11	12	5	0
0mM_female	1	1	26814	678	8.67463	4.2	118.758	5	95.3457	82	-135	1003	0	0	3	10	10	0	10	1	1	5	1	1	2	3	4	5	6	7	8	9	10	11	12	5	0
0mM_female	1	2	5921	497	2.53682	1.8	170.961	42	52.6586	46	-1	372	0	0	3	10	10	0	10	1	1	5	1	1	2	3	4	5	6	7	8	9	10	11	12	5	0
0mM_female	1	3	12834	436	6.2789	4.5	191.446	9.4	95.1118	82	-8	362	0	0	3	10	10	0	10	1	1	5	1	1	2	3	4	5	6	7	8	9	10	11	12	5	0
0mM_female	1	7	1949	109	4.03119	2.8	781.456	42.7	75.4001	53	0	327	0	0	3	10	10	0	10	1	1	5	1	1	2	3	4	5	6	7	8	9	10	11	12	5	0
0mM_female	1	8	4519	250	3.9336	3	340.304	41.6	82.818	69	-1	364	0	0	3	10	10	0	10	1	1	5	1	1	2	3	4	5	6	7	8	9	10	11	12	5	0
0mM_female	1	9	6604	267	5.47341	4.6	316.934	60	80.3627	65	-1	330	0	0	3	10	10	0	10	1	1	5	1	1	2	3	4	5	6	7	8	9	10	11	12	5	0
0mM_female	2	1	42734	1229	7.47063	4.2	62.8299	5.8	60.6646	52	-90	385	0	0	3	10	10	0	10	1	1	5	1	1	2	3	4	5	6	7	8	9	10	11	12	5	0
0mM_female	2	2	22692	628	7.96783	3.8	129.405	3.8	68.4711	56	-131	397	0	0	3	10	10	0	10	1	1	5	1	1	2	3	4	5	6	7	8	9	10	11	12	5	0
0mM_female	2	3	7640	120	13.0633	8.4	701.089	33.6	129.258	119	-73	414	0	0	3	10	10	0	10	1	1	5	1	1	2	3	4	5	6	7	8	9	10	11	12	5	0
0mM_female	2	7	1784	121	3.55702	3	704.664	34.5	81.165	55	-1	373	0	0	3	10	10	0	10	1	1	5	1	1	2	3	4	5	6	7	8	9	10	11	12	5	0
0mM_female	2	8	4247	250	3.9088	1.4	340.327	10.4	93.8878	53	0	397	0	0	3	10	10	0	10	1	1	5	1	1	2	3	4	5	6	7	8	9	10	11	12	5	0
0mM_female	2	9	2428	75	6.944	3.6	1129.98	68.5	128.815	102	-108	448	0	0	3	10	10	0	10	1	1	5	1	1	2	3	4	5	6	7	8	9	10	11	12	5	0
0mM_female	3	1	9789	324	6.68148	3.8	259.186	4.6	76.1998	64.5	-30	389	0	0	3	10	10	0	10	1	1	5	1	1	2	3	4	5	6	7	8	9	10	11	12	5	0
0mM_female	3	2	3603	128	6.01719	2.6	663.8	6.8	89.4718	69	-12	387	0	0	3	10	10	0	10	1	1	5	1	1	2	3	4	5	6	7	8	9	10	11	12	5	0
0mM_female	3	3	10220	356	6.07247	4.4	235.962	30.8	102.733	88	0	433	0	0	3	10	10	0	10	1	1	5	1	1	2	3	4	5	6	7	8	9	10	11	12	5	0
0mM_female	3	7	5917	180	7.22111	4.5	470.169	22.6	79.7152	59	-7	409	0	0	3	10	10	0	10	1	1	5	1	1	2	3	4	5	6	7	8	9	10	11	12	5	0
0mM_female	3	8	2989	163	4.3092	2	522.549	26	93.3306	55.5	0	366	0	0	3	10	10	0	10	1	1	5	1	1	2	3	4	5	6	7	8	9	10	11	12	5	0
0mM_female	3	9	6077	158	8.37468	6.1	535.077	58.8	99.8833	88	-2	368	0	0	3	10	10	0	10	1	1	5	1	1	2	3	4	5	6	7	8	9	10	11	12	5	0
Averages			8435.71	304.629	5.54317	3.15714

## Sheet: VK00040_10mM_Female
Treatment	DFM	Chamber	Licks	Events	MeanDuration	MedDuration	MeanTimeBtw	MedTimeBtw	MeanInt	MedianInt	MinInt	MaxInt	StartMin	EndMin	BaselineWindowMin	FeedingThreshold	FeedingMinimum	TastingLow	TastingHigh	FeedingMinEvents	TastingMinEvents	SamplesSec	ChamberSize	Ch1	Ch2	Ch3	Ch4	Ch5	Ch6	Ch7	Ch8	Ch9	Ch10	Ch11	Ch12	Link.Gap	PI.Multiplier
10mM_female	4	1	7104	238	6.18655	1.8	355.347	43	51.5731	26	-28	438	0	0	3	10	10	0	10	1	1	5	1	1	2	3	4	5	6	7	8	9	10	11	12	5	0
10mM_female	4	2	4308	157	5.98217	3.2	540.894	95.9	62.2357	46	0	302	0	0	3	10	10	0	10	1	1	5	1	1	2	3	4	5	6	7	8	9	10	11	12	5	0
10mM_female	4	3	3024	64	10.0781	5.9	1319.31	112.6	73.574	66	-36	261	0	0	3	10	10	0	10	1	1	5	1	1	2	3	4	5	6	7	8	9	10	11	12	5	0
10mM_female	4	7	1943	169	2.5645	1.2	505.688	52.4	52.85	29	-1	371	0	0	3	10	10	0	10	1	1	5	1	1	2	3	4	5	6	7	8	9	10	11	12	5	0
10mM_female	4	8	973	71	2.97465	1	1197.07	184.7	59.1061	49	0	255	0	0	3	10	10	0	10	1	1	5	1	1	2	3	4	5	6	7	8	9	10	11	12	5	0
10mM_female	4	9	1080	85	2.94353	1	1001.75	70.8	45.0576	31	-45	212	0	0	3	10	10	0	10	1	1	5	1	1	2	3	4	5	6	7	8	9	10	11	12	5	0
10mM_female	5	1	889	68	2.73235	1.1	1249.49	367.4	40.8299	21	-1	215	0	0	3	10	10	0	10	1	1	5	1	1	2	3	4	5	6	7	8	9	10	11	12	5	0
10mM_female	5	2	47	15	0.666667	0.4	5399.43	1713.9	20.52	17	5	52	0	0	3	10	10	0	10	1	1	5	1	1	2	3	4	5	6	7	8	9	10	11	12	5	0
10mM_female	5	3	670	85	1.63059	1	1003.05	218.7	50.4964	38	-1	199	0	0	3	10	10	0	10	1	1	5	1	1	2	3	4	5	6	7	8	9	10	11	12	5	0
10mM_female	5	7	352	55	1.36727	0.8	1541.53	279.7	24.1516	19	0	119	0	0	3	10	10	0	10	1	1	5	1	1	2	3	4	5	6	7	8	9	10	11	12	5	0
10mM_female	5	8	89	31	0.587097	0.4	2699.46	1034.7	22.7473	21	5	59	0	0	3	10	10	0	10	1	1	5	1	1	2	3	4	5	6	7	8	9	10	11	12	5	0
10mM_female	5	9	1049	155	1.46323	0.8	552.397	72.6	34.9577	26	0	193	0	0	3	10	10	0	10	1	1	5	1	1	2	3	4	5	6	7	8	9	10	11	12	5	0
10mM_female	6	1	2644	100	5.522	3.6	849.986	26.2	78.3256	72	-1	321	0	0	3	10	10	0	10	1	1	5	1	1	2	3	4	5	6	7	8	9	10	11	12	5	0
10mM_female	6	2	4374	208	4.35288	2.4	409.069	60.8	48.1772	40	-8	310	0	0	3	10	10	0	10	1	1	5	1	1	2	3	4	5	6	7	8	9	10	11	12	5	0
10mM_female	6	3	5098	243	4.42716	2.6	349.693	27.6	66.5499	54	-1	288	0	0	3	10	10	0	10	1	1	5	1	1	2	3	4	5	6	7	8	9	10	11	12	5	0
10mM_female	6	7	1576	184	1.81522	1	465.226	54.8	43.9527	34	0	222	0	0	3	10	10	0	10	1	1	5	1	1	2	3	4	5	6	7	8	9	10	11	12	5	0
10mM_female	6	8	2006	188	2.33404	1.4	454.825	42	35.2056	27	0	180	0	0	3	10	10	0	10	1	1	5	1	1	2	3	4	5	6	7	8	9	10	11	12	5	0
10mM_female	6	9	4033	282	3.01844	2	302.295	35.8	52.5174	43	-1	277	0	0	3	10	10	0	10	1	1	5	1	1	2	3	4	5	6	7	8	9	10	11	12	5	0
10mM_female	4	1	6453	245	5.72327	4.6	345.522	72.3	95.6941	86	-10	425	0	0	3	10	10	0	10	1	1	5	1	1	2	3	4	5	6	7	8	9	10	11	12	5	0
10mM_female	4	2	11336	200	11.899	4.5	418.014	42.8	81.7107	46	-311	454	0	0	3	10	10	0	10	1	1	5	1	1	2	3	4	5	6	7	8	9	10	11	12	5	0
10mM_female	4	3	818	43	4.14884	3.8	1959.6	14	116.484	101	-1	617	0	0	3	10	10	0	10	1	1	5	1	1	2	3	4	5	6	7	8	9	10	11	12	5	0
10mM_female	4	7	3510	154	5.15714	3.7	552.299	48	66.7139	53	-48	324	0	0	3	10	10	0	10	1	1	5	1	1	2	3	4	5	6	7	8	9	10	11	12	5	0
10mM_female	4	8	3543	195	4.18462	2.8	436.656	7.3	68.8591	55	-2	377	0	0	3	10	10	0	10	1	1	5	1	1	2	3	4	5	6	7	8	9	10	11	12	5	0
10mM_female	4	9	1484	21	14.8571	7.4	3913.12	678	120.322	79	-71	381	0	0	3	10	10	0	10	1	1	5	1	1	2	3	4	5	6	7	8	9	10	11	12	5	0
10mM_female	5	1	12699	409	6.63276	4.8	204.116	35	81.2509	76	-110	341	0	0	3	10	10	0	10	1	1	5	1	1	2	3	4	5	6	7	8	9	10	11	12	5	0
10mM_female	5	2	7617	183	8.64481	3.6	460.97	9.6	92.4681	77	-75	421	0	0	3	10	10	0	10	1	1	5	1	1	2	3	4	5	6	7	8	9	10	11	12	5	0
10mM_female	5	3	18214	544	7.14926	3.7	151.397	12.4	52.8944	47	-81	250	0	0	3	10	10	0	10	1	1	5	1	1	2	3	4	5	6	7	8	9	10	11	12	5	0
10mM_female	5	7	8740	304	6.35132	3.7	276.95	30.8	65.2975	55	-71	322	0	0	3	10	10	0	10	1	1	5	1	1	2	3	4	5	6	7	8	9	10	11	12	5	0
10mM_female	5	8	6169	198	6.82828	3.7	427.379	44	72.9192	71	-80	272	0	0	3	10	10	0	10	1	1	5	1	1	2	3	4	5	6	7	8	9	10	11	12	5	0
10mM_female	5	9	6188	233	5.73219	4	363.525	26.9	80.4542	76	0	296	0	0	3	10	10	0	10	1	1	5	1	1	2	3	4	5	6	7	8	9	10	11	12	5	0
10mM_female	6	1	7764	239	6.78912	3.8	353.241	31.1	55.282	51	-45	197	0	0	3	10	10	0	10	1	1	5	1	1	2	3	4	5	6	7	8	9	10	11	12	5	0
10mM_female	6	2	6014	266	4.85639	4	318.759	37.2	57.9971	52	-1	286	0	0	3	10	10	0	10	1	1	5	1	1	2	3	4	5	6	7	8	9	10	11	12	5	0
10mM_female	6	3	5338	136	8.20735	4.9	622.512	64.6	73.0133	67	-32	270	0	0	3	10	10	0	10	1	1	5	1	1	2	3	4	5	6	7	8	9	10	11	12	5	0
10mM_female	6	7	5808	233	5.38798	3.2	363.868	31.1	71.1477	64	-52	331	0	0	3	10	10	0	10	1	1	5	1	1	2	3	4	5	6	7	8	9	10	11	12	5	0
10mM_female	6	8	4467	307	3.22932	2.6	277.302	56.7	57.6645	50	0	229	0	0	3	10	10	0	10	1	1	5	1	1	2	3	4	5	6	7	8	9	10	11	12	5	0
10mM_female	6	9	2320	98	5.06735	3.3	867.715	39.8	74.2211	58	-70	310	0	0	3	10	10	0	10	1	1	5	1	1	2	3	4	5	6	7	8	9	10	11	12	5	0
Averages			4437.25	177.944	5.04146	2.88056

## Sheet: AGES_0mM_Female
Treatment	DFM	Chamber	Licks	Events	MeanDuration	MedDuration	MeanTimeBtw	MedTimeBtw	MeanInt	MedianInt	MinInt	MaxInt	StartMin	EndMin	BaselineWindowMin	FeedingThreshold	FeedingMinimum	TastingLow	TastingHigh	FeedingMinEvents	TastingMinEvents	SamplesSec	ChamberSize	Ch1	Ch2	Ch3	Ch4	Ch5	Ch6	Ch7	Ch8	Ch9	Ch10	Ch11	Ch12	Link.Gap	PI.Multiplier
0mM_female	4	4	2215	237	2.13333	1.6	360.903	39.9	41.3742	32	-1	181	0	0	3	10	10	0	10	1	1	5	1	1	2	3	4	5	6	7	8	9	10	11	12	5	0
0mM_female	4	5	54	16	0.675	0.4	5081.75	819	26.6481	21	11	120	0	0	3	10	10	0	10	1	1	5	1	1	2	3	4	5	6	7	8	9	10	11	12	5	0
0mM_female	4	6	5200	376	3.10426	2.8	226.083	39.8	40.8609	31.5	0	240	0	0	3	10	10	0	10	1	1	5	1	1	2	3	4	5	6	7	8	9	10	11	12	5	0
0mM_female	4	10	25204	922	5.80781	4.2	87.8069	6.4	42.6405	38	-29	278	0	0	3	10	10	0	10	1	1	5	1	1	2	3	4	5	6	7	8	9	10	11	12	5	0
0mM_female	4	11	29329	808	7.99505	4.5	98.8141	4	50.9161	45	-66	298	0	0	3	10	10	0	10	1	1	5	1	1	2	3	4	5	6	7	8	9	10	11	12	5	0
0mM_female	4	12	34296	817	8.81909	5.4	96.8159	18.6	63.8196	60	-100	382	0	0	3	10	10	0	10	1	1	5	1	1	2	3	4	5	6	7	8	9	10	11	12	5	0
0mM_female	5	4	3240	135	5.16148	4.4	630.172	51	38.2621	34	0	207	0	0	3	10	10	0	10	1	1	5	1	1	2	3	4	5	6	7	8	9	10	11	12	5	0
0mM_female	5	5	3008	206	3.15534	0.8	414.252	37.6	55.9975	39	-3	271	0	0	3	10	10	0	10	1	1	5	1	1	2	3	4	5	6	7	8	9	10	11	12	5	0
0mM_female	5	6	4649	174	5.47126	4.7	488.275	30	57.5773	52	0	234	0	0	3	10	10	0	10	1	1	5	1	1	2	3	4	5	6	7	8	9	10	11	12	5	0
0mM_female	5	10	25510	645	8.29085	5.6	125.468	39.6	59.5174	58	-62	199	0	0	3	10	10	0	10	1	1	5	1	1	2	3	4	5	6	7	8	9	10	11	12	5	0
0mM_female	5	11	7137	311	4.90161	2.6	272.038	32.3	49.7038	40	-8	211	0	0	3	10	10	0	10	1	1	5	1	1	2	3	4	5	6	7	8	9	10	11	12	5	0
0mM_female	5	12	14510	405	7.48049	5	205.346	34	62.4631	60	-31	250	0	0	3	10	10	0	10	1	1	5	1	1	2	3	4	5	6	7	8	9	10	11	12	5	0
0mM_female	6	4	3311	228	3.35263	2.4	373.956	22.4	34.5387	27	-1	168	0	0	3	10	10	0	10	1	1	5	1	1	2	3	4	5	6	7	8	9	10	11	12	5	0
0mM_female	6	5	5566	335	3.76537	3.6	253.39	33.5	41.2687	34	-1	246	0	0	3	10	10	0	10	1	1	5	1	1	2	3	4	5	6	7	8	9	10	11	12	5	0
0mM_female	6	6	2763	261	2.31111	1	327.47	60.8	35.3415	29	-1	206	0	0	3	10	10	0	10	1	1	5	1	1	2	3	4	5	6	7	8	9	10	11	12	5	0
0mM_female	6	10	28317	639	9.82754	4.6	125.384	8.6	48.5553	46	-74	304	0	0	3	10	10	0	10	1	1	5	1	1	2	3	4	5	6	7	8	9	10	11	12	5	0
0mM_female	6	11	30983	904	7.60996	4	87.8685	3.2	49.3034	43	-91	267	0	0	3	10	10	0	10	1	1	5	1	1	2	3	4	5	6	7	8	9	10	11	12	5	0
0mM_female	6	12	32035	1208	5.71076	4.4	65.7583	4.6	42.3477	39	-15	771	0	0	3	10	10	0	10	1	1	5	1	1	2	3	4	5	6	7	8	9	10	11	12	5	0
0mM_female	1	1	38508	1138	7.4638	3.8	68.4578	3.2	58.2958	47	-111	299	0	0	3	10	10	0	10	1	1	5	1	1	2	3	4	5	6	7	8	9	10	11	12	5	0
0mM_female	1	2	29655	613	10.3162	5	130.628	4.4	71.9763	66	-104	380	0	0	3	10	10	0	10	1	1	5	1	1	2	3	4	5	6	7	8	9	10	11	12	5	0
0mM_female	1	3	62301	1667	8.13629	4.2	43.6664	3.8	71.5709	65	-85	346	0	0	3	10	10	0	10	1	1	5	1	1	2	3	4	5	6	7	8	9	10	11	12	5	0
0mM_female	1	7	2883	148	4.11081	1.4	575.774	23.2	44.0608	25	-36	348	0	0	3	10	10	0	10	1	1	5	1	1	2	3	4	5	6	7	8	9	10	11	12	5	0
0mM_female	1	8	2973	143	4.67133	3.6	595.353	35.4	64.197	51	-1	280	0	0	3	10	10	0	10	1	1	5	1	1	2	3	4	5	6	7	8	9	10	11	12	5	0
0mM_female	1	9	3518	128	5.63281	4.9	664.169	35.2	94.4316	79	0	369	0	0	3	10	10	0	10	1	1	5	1	1	2	3	4	5	6	7	8	9	10	11	12	5	0
0mM_female	2	1	585	33	3.58788	2.4	2537.65	172.6	42.8024	35	8	174	0	0	3	10	10	0	10	1	1	5	1	1	2	3	4	5	6	7	8	9	10	11	12	5	0
0mM_female	2	2	21041	486	8.88313	5.6	168.545	19.4	78.3867	74	-51	301	0	0	3	10	10	0	10	1	1	5	1	1	2	3	4	5	6	7	8	9	10	11	12	5	0
0mM_female	2	3	860	77	2.37143	1.2	1105.33	34.7	31.195	21	-1	231	0	0	3	10	10	0	10	1	1	5	1	1	2	3	4	5	6	7	8	9	10	11	12	5	0
0mM_female	2	7	367	35	2.28571	2	2397.74	40.7	33.31	28	0	120	0	0	3	10	10	0	10	1	1	5	1	1	2	3	4	5	6	7	8	9	10	11	12	5	0
0mM_female	2	8	2559	301	1.83123	0.8	284.263	36.3	41.6415	31	0	252	0	0	3	10	10	0	10	1	1	5	1	1	2	3	4	5	6	7	8	9	10	11	12	5	0
0mM_female	2	9	353	33	2.3697	1.4	2538.84	25	25.867	21	-3	108	0	0	3	10	10	0	10	1	1	5	1	1	2	3	4	5	6	7	8	9	10	11	12	5	0
0mM_female	3	1	14115	577	5.28007	4	144.209	6.6	65.4345	53	-7	363	0	0	3	10	10	0	10	1	1	5	1	1	2	3	4	5	6	7	8	9	10	11	12	5	0
0mM_female	3	2	4352	300	3.01333	2.2	284.039	64.8	51.9465	49	-1	216	0	0	3	10	10	0	10	1	1	5	1	1	2	3	4	5	6	7	8	9	10	11	12	5	0
0mM_female	3	3	7219	365	4.37534	3.6	231.701	30	62.9222	49	0	316	0	0	3	10	10	0	10	1	1	5	1	1	2	3	4	5	6	7	8	9	10	11	12	5	0
0mM_female	3	7	4454	236	4.04322	3.6	360.529	26.4	61.5022	51	-1	301	0	0	3	10	10	0	10	1	1	5	1	1	2	3	4	5	6	7	8	9	10	11	12	5	0
0mM_female	3	8	3151	136	5.06765	4.5	625.623	52.6	61.1956	49	0	304	0	0	3	10	10	0	10	1	1	5	1	1	2	3	4	5	6	7	8	9	10	11	12	5	0
0mM_female	3	9	2124	101	4.50099	3.8	842.598	36.9	64.681	54	0	323	0	0	3	10	10	0	10	1	1	5	1	1	2	3	4	5	6	7	8	9	10	11	12	5	0
Averages			13094	432.229	5.22397	3.41714

## Sheet: AGES_10mM_Female
Treatment	DFM	Chamber	Licks	Events	MeanDuration	MedDuration	MeanTimeBtw	MedTimeBtw	MeanInt	MedianInt	MinInt	MaxInt	StartMin	EndMin	BaselineWindowMin	FeedingThreshold	FeedingMinimum	TastingLow	TastingHigh	FeedingMinEvents	TastingMinEvents	SamplesSec	ChamberSize	Ch1	Ch2	Ch3	Ch4	Ch5	Ch6	Ch7	Ch8	Ch9	Ch10	Ch11	Ch12	Link.Gap	PI.Multiplier
10mM_female	1	4	2173	110	4.16909	3.7	774.241	51	105.036	89	-1	388	0	0	3	10	10	0	10	1	1	5	1	1	2	3	4	5	6	7	8	9	10	11	12	5	0
10mM_female	1	5	2224	112	4.1	3.4	760.533	44.8	115.628	95	-1	395	0	0	3	10	10	0	10	1	1	5	1	1	2	3	4	5	6	7	8	9	10	11	12	5	0
10mM_female	1	6	2520	100	5.176	4.4	850.315	34	116.875	105	-3	640	0	0	3	10	10	0	10	1	1	5	1	1	2	3	4	5	6	7	8	9	10	11	12	5	0
10mM_female	1	10	5272	141	7.70071	5.2	600.8	87.8	109.794	101	-88	440	0	0	3	10	10	0	10	1	1	5	1	1	2	3	4	5	6	7	8	9	10	11	12	5	0
10mM_female	1	11	7636	240	6.46	5.8	352.071	82	129.204	125	-4	389	0	0	3	10	10	0	10	1	1	5	1	1	2	3	4	5	6	7	8	9	10	11	12	5	0
10mM_female	1	12	6917	268	5.30597	4.4	315.901	43.6	98.8468	92	-2	387	0	0	3	10	10	0	10	1	1	5	1	1	2	3	4	5	6	7	8	9	10	11	12	5	0
10mM_female	2	4	2584	250	2.2304	1.6	341.998	32.4	47.8526	42	-1	241	0	0	3	10	10	0	10	1	1	5	1	1	2	3	4	5	6	7	8	9	10	11	12	5	0
10mM_female	2	5	912	130	1.58923	0.8	657.959	43.4	45.9361	33	-1	198	0	0	3	10	10	0	10	1	1	5	1	1	2	3	4	5	6	7	8	9	10	11	12	5	0
10mM_female	2	6	932	222	0.905405	0.4	386.539	20.6	43.1542	30	0	230	0	0	3	10	10	0	10	1	1	5	1	1	2	3	4	5	6	7	8	9	10	11	12	5	0
10mM_female	2	10	13447	286	9.79021	6.6	291.286	26.8	68.4785	64	-68	284	0	0	3	10	10	0	10	1	1	5	1	1	2	3	4	5	6	7	8	9	10	11	12	5	0
10mM_female	2	11	932	166	1.1988	0.8	519.278	137.1	34.1508	30	-4	119	0	0	3	10	10	0	10	1	1	5	1	1	2	3	4	5	6	7	8	9	10	11	12	5	0
10mM_female	2	12	2984	380	1.62842	1.2	225.145	96.8	41.5507	38	0	259	0	0	3	10	10	0	10	1	1	5	1	1	2	3	4	5	6	7	8	9	10	11	12	5	0
10mM_female	3	4	5768	446	2.80628	1.8	190.489	16.4	46.8811	42	-1	199	0	0	3	10	10	0	10	1	1	5	1	1	2	3	4	5	6	7	8	9	10	11	12	5	0
10mM_female	3	5	1790	128	3.06094	2	666.732	43.2	54.4022	44	-1	204	0	0	3	10	10	0	10	1	1	5	1	1	2	3	4	5	6	7	8	9	10	11	12	5	0
10mM_female	3	6	3044	164	3.87439	2.2	519.787	17.8	68.1681	67	0	241	0	0	3	10	10	0	10	1	1	5	1	1	2	3	4	5	6	7	8	9	10	11	12	5	0
10mM_female	3	10	14055	346	8.59017	5	240.427	31.8	59.7995	54	-66	275	0	0	3	10	10	0	10	1	1	5	1	1	2	3	4	5	6	7	8	9	10	11	12	5	0
10mM_female	3	11	14498	293	10.2751	6.4	283.638	38.1	84.0912	79	-84	324	0	0	3	10	10	0	10	1	1	5	1	1	2	3	4	5	6	7	8	9	10	11	12	5	0
10mM_female	3	12	16256	474	7.30127	3.8	174.609	11.8	58.7072	49	-79	323	0	0	3	10	10	0	10	1	1	5	1	1	2	3	4	5	6	7	8	9	10	11	12	5	0
10mM_female	4	1	12360	235	10.9174	6.8	355.228	30.2	96.0872	90	-50	397	0	0	3	10	10	0	10	1	1	5	1	1	2	3	4	5	6	7	8	9	10	11	12	5	0
10mM_female	4	2	9742	386	5.37876	3.8	218.454	28.9	75.5322	76	-44	280	0	0	3	10	10	0	10	1	1	5	1	1	2	3	4	5	6	7	8	9	10	11	12	5	0
10mM_female	4	3	18045	588	6.74626	2.6	139.953	6	46.2343	40	-73	249	0	0	3	10	10	0	10	1	1	5	1	1	2	3	4	5	6	7	8	9	10	11	12	5	0
10mM_female	4	7	2529	100	5.312	4.1	850.18	38.6	73.817	67	0	580	0	0	3	10	10	0	10	1	1	5	1	1	2	3	4	5	6	7	8	9	10	11	12	5	0
10mM_female	4	8	2470	99	5.1798	4.6	858.866	51	78.5211	74	0	228	0	0	3	10	10	0	10	1	1	5	1	1	2	3	4	5	6	7	8	9	10	11	12	5	0
10mM_female	4	9	3295	149	4.77584	4	571.252	37.2	61.638	58	0	248	0	0	3	10	10	0	10	1	1	5	1	1	2	3	4	5	6	7	8	9	10	11	12	5	0
10mM_female	5	1	6439	246	5.64797	1.5	344.172	51.8	54.1154	45	-86	230	0	0	3	10	10	0	10	1	1	5	1	1	2	3	4	5	6	7	8	9	10	11	12	5	0
10mM_female	5	2	13096	423	6.45012	2.2	197.338	26.4	55.005	48	-40	254	0	0	3	10	10	0	10	1	1	5	1	1	2	3	4	5	6	7	8	9	10	11	12	5	0
10mM_female	5	3	4857	209	4.79809	1.4	406.652	81.2	62.1643	61	-30	245	0	0	3	10	10	0	10	1	1	5	1	1	2	3	4	5	6	7	8	9	10	11	12	5	0
10mM_female	5	7	1634	114	3.32281	2	748.009	15.2	33.9636	32	0	135	0	0	3	10	10	0	10	1	1	5	1	1	2	3	4	5	6	7	8	9	10	11	12	5	0
10mM_female	5	8	131	23	1.18261	0.4	3598.86	1135.8	24.9191	22	7	67	0	0	3	10	10	0	10	1	1	5	1	1	2	3	4	5	6	7	8	9	10	11	12	5	0
10mM_female	5	9	498	17	6.07059	3.2	4794.26	556.2	62.9399	60	-1	188	0	0	3	10	10	0	10	1	1	5	1	1	2	3	4	5	6	7	8	9	10	11	12	5	0
10mM_female	6	1	5355	237	4.64979	2	358.394	59.6	60.0755	52	-13	233	0	0	3	10	10	0	10	1	1	5	1	1	2	3	4	5	6	7	8	9	10	11	12	5	0
10mM_female	6	2	4364	136	6.59559	2.5	624.108	83.8	48.6029	47	-1	176	0	0	3	10	10	0	10	1	1	5	1	1	2	3	4	5	6	7	8	9	10	11	12	5	0
10mM_female	6	3	6709	224	6.31071	3.2	377.716	31.6	60.4329	54	-65	282	0	0	3	10	10	0	10	1	1	5	1	1	2	3	4	5	6	7	8	9	10	11	12	5	0
10mM_female	6	7	1178	102	2.47843	1.2	836.379	26	48.6274	39	0	211	0	0	3	10	10	0	10	1	1	5	1	1	2	3	4	5	6	7	8	9	10	11	12	5	0
10mM_female	6	8	935	22	8.81818	1.7	3748.08	140.2	65.0711	54	0	246	0	0	3	10	10	0	10	1	1	5	1	1	2	3	4	5	6	7	8	9	10	11	12	5	0
10mM_female	6	9	2017	103	4.11845	2.4	826.688	41	57.8868	54	-1	185	0	0	3	10	10	0	10	1	1	5	1	1	2	3	4	5	6	7	8	9	10	11	12	5	0
Averages			5544.39	213.028	5.13655	3.03056
