# Supplementary material for: Auxin exposure disrupts feeding behavior and fatty acid metabolism in adult Drosophila
Source: eLife. 2024 Jan 19;12:RP91953. doi: 10.7554/eLife.91953 (PMC10945601; doi:10.7554/eLife.91953)
Supplement: Figure 1—source data 4. [file elife-91953-fig1-data4.xlsx]

## Sheet: VK00040_0mM_Male
Treatment	DFM	Chamber	Licks	Events	MeanDuration	MedDuration	MeanTimeBtw	MedTimeBtw	MeanInt	MedianInt	MinInt	MaxInt	StartMin	EndMin	BaselineWindowMin	FeedingThreshold	FeedingMinimum	TastingLow	TastingHigh	FeedingMinEvents	TastingMinEvents	SamplesSec	ChamberSize	Ch1	Ch2	Ch3	Ch4	Ch5	Ch6	Ch7	Ch8	Ch9	Ch10	Ch11	Ch12	Link.Gap	PI.Multiplier
0mM_male	1	4	18	5	0.84	0.6	14399.3	3784.9	28.4762	32	0	73	0	0	3	10	10	0	10	1	1	5	1	1	2	3	4	5	6	7	8	9	10	11	12	5	0
0mM_male	1	5	1763	154	2.37273	1.2	555.061	166.2	63.653	51	-1	355	0	0	3	10	10	0	10	1	1	5	1	1	2	3	4	5	6	7	8	9	10	11	12	5	0
0mM_male	1	6	2107	293	1.53447	1.2	292.348	96.3	51.3501	44	-1	223	0	0	3	10	10	0	10	1	1	5	1	1	2	3	4	5	6	7	8	9	10	11	12	5	0
0mM_male	1	10	538	81	1.40494	1	1052.27	98.7	49.2478	38	0	223	0	0	3	10	10	0	10	1	1	5	1	1	2	3	4	5	6	7	8	9	10	11	12	5	0
0mM_male	1	11	2310	230	2.25304	1.6	371.782	22.6	46.1876	28	-1	409	0	0	3	10	10	0	10	1	1	5	1	1	2	3	4	5	6	7	8	9	10	11	12	5	0
0mM_male	1	12	1196	120	2.27667	1.2	711.79	56.8	35.2416	29.5	-1	182	0	0	3	10	10	0	10	1	1	5	1	1	2	3	4	5	6	7	8	9	10	11	12	5	0
0mM_male	2	4	10578	686	3.39679	1.4	122.372	23.8	59.5355	49	-1	303	0	0	3	10	10	0	10	1	1	5	1	1	2	3	4	5	6	7	8	9	10	11	12	5	0
0mM_male	2	5	4426	342	2.88187	2	249.02	37.6	73.5132	59	-14	327	0	0	3	10	10	0	10	1	1	5	1	1	2	3	4	5	6	7	8	9	10	11	12	5	0
0mM_male	2	6	2803	222	2.62523	1.8	384.829	105.6	58.9121	49	0	302	0	0	3	10	10	0	10	1	1	5	1	1	2	3	4	5	6	7	8	9	10	11	12	5	0
0mM_male	2	10	741	66	2.42727	1.2	1287.16	313.2	34.171	32	0	134	0	0	3	10	10	0	10	1	1	5	1	1	2	3	4	5	6	7	8	9	10	11	12	5	0
0mM_male	2	11	11	3	0.733333	0.6	21599.3	18854.9	29.4545	23	14	89	0	0	3	10	10	0	10	1	1	5	1	1	2	3	4	5	6	7	8	9	10	11	12	5	0
0mM_male	2	12	571	93	1.40645	0.8	917.753	16.7	61.1116	30	0	267	0	0	3	10	10	0	10	1	1	5	1	1	2	3	4	5	6	7	8	9	10	11	12	5	0
0mM_male	3	4	11623	381	6.64252	2.6	219.554	3.4	66.5379	54	-129	632	0	0	3	10	10	0	10	1	1	5	1	1	2	3	4	5	6	7	8	9	10	11	12	5	0
0mM_male	3	5	36703	880	8.79023	3.8	89.2908	6.6	69.6083	40	-251	753	0	0	3	10	10	0	10	1	1	5	1	1	2	3	4	5	6	7	8	9	10	11	12	5	0
0mM_male	3	6	11156	275	8.59855	2.4	304.478	8.6	63.2481	41	-197	625	0	0	3	10	10	0	10	1	1	5	1	1	2	3	4	5	6	7	8	9	10	11	12	5	0
0mM_male	3	10	5180	147	7.62993	5	576.209	43.2	75.9586	66	-107	330	0	0	3	10	10	0	10	1	1	5	1	1	2	3	4	5	6	7	8	9	10	11	12	5	0
0mM_male	3	11	4008	228	3.85088	2	373.461	36.4	67.8241	47	-13	358	0	0	3	10	10	0	10	1	1	5	1	1	2	3	4	5	6	7	8	9	10	11	12	5	0
0mM_male	3	12	13024	295	9.35797	5.4	282.568	48.9	41.874	25	-30	330	0	0	3	10	10	0	10	1	1	5	1	1	2	3	4	5	6	7	8	9	10	11	12	5	0
0mM_male	1	4	8857	459	4.37168	3	183.463	27.1	72.5657	57	-1	412	0	0	3	10	10	0	10	1	1	5	1	1	2	3	4	5	6	7	8	9	10	11	12	5	0
0mM_male	1	5	15766	444	7.65991	5.4	186.934	17.7	88.434	81	-34	361	0	0	3	10	10	0	10	1	1	5	1	1	2	3	4	5	6	7	8	9	10	11	12	5	0
0mM_male	1	6	10665	314	7.11529	4.4	267.192	63	113.761	104	-1	459	0	0	3	10	10	0	10	1	1	5	1	1	2	3	4	5	6	7	8	9	10	11	12	5	0
0mM_male	1	10	4916	223	4.78386	4	380.95	45.4	93.0561	79	-13	420	0	0	3	10	10	0	10	1	1	5	1	1	2	3	4	5	6	7	8	9	10	11	12	5	0
0mM_male	1	11	2945	294	2.1898	1.6	290.698	49	54.786	40	-2	392	0	0	3	10	10	0	10	1	1	5	1	1	2	3	4	5	6	7	8	9	10	11	12	5	0
0mM_male	1	12	4696	248	4.15645	3.1	342.847	58.8	65.9133	48	0	314	0	0	3	10	10	0	10	1	1	5	1	1	2	3	4	5	6	7	8	9	10	11	12	5	0
0mM_male	2	4	23477	674	7.46261	5.2	120.548	8.2	106.586	105	-96	382	0	0	3	10	10	0	10	1	1	5	1	1	2	3	4	5	6	7	8	9	10	11	12	5	0
0mM_male	2	5	13729	312	9.26603	6.2	266.8	25	112.891	113	-153	405	0	0	3	10	10	0	10	1	1	5	1	1	2	3	4	5	6	7	8	9	10	11	12	5	0
0mM_male	2	6	15674	386	8.51036	5	214.766	14	114.334	111	-118	404	0	0	3	10	10	0	10	1	1	5	1	1	2	3	4	5	6	7	8	9	10	11	12	5	0
0mM_male	2	10	4711	210	4.91238	3.8	404.587	52.2	107.082	89	0	384	0	0	3	10	10	0	10	1	1	5	1	1	2	3	4	5	6	7	8	9	10	11	12	5	0
0mM_male	2	11	5476	318	3.71321	2.6	267.143	35	92.3621	76	-4	370	0	0	3	10	10	0	10	1	1	5	1	1	2	3	4	5	6	7	8	9	10	11	12	5	0
0mM_male	2	12	4545	300	3.39533	2.8	283.657	32.2	74.5062	57	0	360	0	0	3	10	10	0	10	1	1	5	1	1	2	3	4	5	6	7	8	9	10	11	12	5	0
0mM_male	3	4	3201	108	6.16667	4.5	786.554	10.2	105.884	92	0	346	0	0	3	10	10	0	10	1	1	5	1	1	2	3	4	5	6	7	8	9	10	11	12	5	0
0mM_male	3	5	25980	690	8.0658	5.6	117.152	6.7	92.9971	84	-170	489	0	0	3	10	10	0	10	1	1	5	1	1	2	3	4	5	6	7	8	9	10	11	12	5	0
0mM_male	3	6	30662	613	10.6271	6.6	130.107	7.3	84.2625	79	-102	352	0	0	3	10	10	0	10	1	1	5	1	1	2	3	4	5	6	7	8	9	10	11	12	5	0
0mM_male	3	10	3097	141	4.96312	3.6	603.525	42.8	100.59	70	0	387	0	0	3	10	10	0	10	1	1	5	1	1	2	3	4	5	6	7	8	9	10	11	12	5	0
0mM_male	3	11	6327	213	6.47981	4.4	397.291	51.3	79.1265	70	-89	470	0	0	3	10	10	0	10	1	1	5	1	1	2	3	4	5	6	7	8	9	10	11	12	5	0
0mM_male	3	12	2569	75	7.25867	4.8	1129.68	87.1	108.67	88	-1	356	0	0	3	10	10	0	10	1	1	5	1	1	2	3	4	5	6	7	8	9	10	11	12	5	0
Averages			8706.47	309.265	5.2514	3.27059

## Sheet: VK00040_10mM_Male
Treatment	DFM	Chamber	Licks	Events	MeanDuration	MedDuration	MeanTimeBtw	MedTimeBtw	MeanInt	MedianInt	MinInt	MaxInt	StartMin	EndMin	BaselineWindowMin	FeedingThreshold	FeedingMinimum	TastingLow	TastingHigh	FeedingMinEvents	TastingMinEvents	SamplesSec	ChamberSize	Ch1	Ch2	Ch3	Ch4	Ch5	Ch6	Ch7	Ch8	Ch9	Ch10	Ch11	Ch12	Link.Gap	PI.Multiplier
10mM_male	4	4	0	0	NA	NA	86400.4	86400.4	NA	NA	NA	NA	0	0	3	10	10	0	10	1	1	5	1	1	2	3	4	5	6	7	8	9	10	11	12	5	0
10mM_male	4	5	3602	174	4.34138	2	489.4	33.2	72.1567	47	-28	345	0	0	3	10	10	0	10	1	1	5	1	1	2	3	4	5	6	7	8	9	10	11	12	5	0
10mM_male	4	6	4009	275	3.18764	1.8	309.869	45.4	67.7481	56	0	295	0	0	3	10	10	0	10	1	1	5	1	1	2	3	4	5	6	7	8	9	10	11	12	5	0
10mM_male	4	10	1088	73	3.36986	1.8	1164.25	119.8	57.8886	44	0	641	0	0	3	10	10	0	10	1	1	5	1	1	2	3	4	5	6	7	8	9	10	11	12	5	0
10mM_male	4	11	1043	68	3.45882	1.4	1248.77	127	61.2066	35	0	344	0	0	3	10	10	0	10	1	1	5	1	1	2	3	4	5	6	7	8	9	10	11	12	5	0
10mM_male	4	12	407	51	1.87451	0.8	1659.71	73.8	59.2824	46	0	288	0	0	3	10	10	0	10	1	1	5	1	1	2	3	4	5	6	7	8	9	10	11	12	5	0
10mM_male	5	4	453	36	2.6	1.3	2332.63	73	50.9274	46	0	177	0	0	3	10	10	0	10	1	1	5	1	1	2	3	4	5	6	7	8	9	10	11	12	5	0
10mM_male	5	5	1191	151	1.64636	1	566.791	73.5	35.967	29	0	290	0	0	3	10	10	0	10	1	1	5	1	1	2	3	4	5	6	7	8	9	10	11	12	5	0
10mM_male	5	6	267	32	1.775	1.5	2616.48	94.8	42.6761	41	0	143	0	0	3	10	10	0	10	1	1	5	1	1	2	3	4	5	6	7	8	9	10	11	12	5	0
10mM_male	5	10	135	21	1.31429	0.6	3926.05	693.9	42.8551	27	3	254	0	0	3	10	10	0	10	1	1	5	1	1	2	3	4	5	6	7	8	9	10	11	12	5	0
10mM_male	5	11	2	2	0.2	0.2	28800.1	24902.4	12.5	12.5	11	14	0	0	3	10	10	0	10	1	1	5	1	1	2	3	4	5	6	7	8	9	10	11	12	5	0
10mM_male	5	12	0	0	NA	NA	86400.8	86400.8	NA	NA	NA	NA	0	0	3	10	10	0	10	1	1	5	1	1	2	3	4	5	6	7	8	9	10	11	12	5	0
10mM_male	6	4	4252	242	3.69669	2.1	351.877	84	38.3776	26	0	252	0	0	3	10	10	0	10	1	1	5	1	1	2	3	4	5	6	7	8	9	10	11	12	5	0
10mM_male	6	5	6356	392	3.56071	2.4	216.298	27.4	55.1037	46	-1	254	0	0	3	10	10	0	10	1	1	5	1	1	2	3	4	5	6	7	8	9	10	11	12	5	0
10mM_male	6	6	2661	94	5.74894	4.1	903.794	26	55.9393	46	0	219	0	0	3	10	10	0	10	1	1	5	1	1	2	3	4	5	6	7	8	9	10	11	12	5	0
10mM_male	6	10	1653	199	1.75477	1	430.258	37.5	34.1208	29	0	141	0	0	3	10	10	0	10	1	1	5	1	1	2	3	4	5	6	7	8	9	10	11	12	5	0
10mM_male	6	11	3256	289	2.39585	1	295.546	56.4	49.4584	42	-1	241	0	0	3	10	10	0	10	1	1	5	1	1	2	3	4	5	6	7	8	9	10	11	12	5	0
10mM_male	6	12	894	120	1.575	0.8	712.494	159.6	32.0667	24	0	202	0	0	3	10	10	0	10	1	1	5	1	1	2	3	4	5	6	7	8	9	10	11	12	5	0
10mM_male	4	4	5936	323	3.93498	2.6	262.746	32.3	63.7756	56	-48	358	0	0	3	10	10	0	10	1	1	5	1	1	2	3	4	5	6	7	8	9	10	11	12	5	0
10mM_male	4	5	2928	79	7.74684	3	1085.93	10	106.391	90	-63	377	0	0	3	10	10	0	10	1	1	5	1	1	2	3	4	5	6	7	8	9	10	11	12	5	0
10mM_male	4	6	5746	283	4.48763	3.2	299.756	19.7	87.8639	63	-12	496	0	0	3	10	10	0	10	1	1	5	1	1	2	3	4	5	6	7	8	9	10	11	12	5	0
10mM_male	4	10	7052	279	5.60072	3.2	302.993	27.6	83.5135	71	-116	344	0	0	3	10	10	0	10	1	1	5	1	1	2	3	4	5	6	7	8	9	10	11	12	5	0
10mM_male	4	11	2393	269	2.11822	1	317.892	23.4	38.8178	28	-2	302	0	0	3	10	10	0	10	1	1	5	1	1	2	3	4	5	6	7	8	9	10	11	12	5	0
10mM_male	4	12	8290	558	3.5172	2.2	151.052	21.2	51.3847	41	-3	269	0	0	3	10	10	0	10	1	1	5	1	1	2	3	4	5	6	7	8	9	10	11	12	5	0
10mM_male	5	4	2	1	0.4	0.4	43200	43200	242	242	183	301	0	0	3	10	10	0	10	1	1	5	1	1	2	3	4	5	6	7	8	9	10	11	12	5	0
10mM_male	5	5	15021	352	8.86875	6.5	235.917	35	87.7434	85	-61	371	0	0	3	10	10	0	10	1	1	5	1	1	2	3	4	5	6	7	8	9	10	11	12	5	0
10mM_male	5	6	16048	306	10.7366	7.4	270.733	28.8	104.729	104	-69	461	0	0	3	10	10	0	10	1	1	5	1	1	2	3	4	5	6	7	8	9	10	11	12	5	0
10mM_male	5	10	4033	213	4.21221	2	399.548	27.1	84.4938	64	-2	374	0	0	3	10	10	0	10	1	1	5	1	1	2	3	4	5	6	7	8	9	10	11	12	5	0
10mM_male	5	11	3252	145	4.86345	3	586.953	42	68.0664	64	-1	202	0	0	3	10	10	0	10	1	1	5	1	1	2	3	4	5	6	7	8	9	10	11	12	5	0
10mM_male	5	12	8838	260	7.13846	4.4	323.925	16.2	74.4694	69	-40	289	0	0	3	10	10	0	10	1	1	5	1	1	2	3	4	5	6	7	8	9	10	11	12	5	0
10mM_male	6	4	5316	277	4.09314	3.2	306.714	37.8	69.8596	59	0	312	0	0	3	10	10	0	10	1	1	5	1	1	2	3	4	5	6	7	8	9	10	11	12	5	0
10mM_male	6	5	3154	167	4.02515	2.8	510.287	93.3	45.6694	39	-1	227	0	0	3	10	10	0	10	1	1	5	1	1	2	3	4	5	6	7	8	9	10	11	12	5	0
10mM_male	6	6	5030	214	5.04579	3.4	396.84	19.8	78.173	70	-4	300	0	0	3	10	10	0	10	1	1	5	1	1	2	3	4	5	6	7	8	9	10	11	12	5	0
10mM_male	6	10	5927	232	5.70517	2.8	366.71	14.4	55.2999	47	-44	260	0	0	3	10	10	0	10	1	1	5	1	1	2	3	4	5	6	7	8	9	10	11	12	5	0
10mM_male	6	11	5116	256	4.35781	2.6	331.847	16.8	45.9254	36	-64	272	0	0	3	10	10	0	10	1	1	5	1	1	2	3	4	5	6	7	8	9	10	11	12	5	0
10mM_male	6	12	5412	244	4.69344	3.6	347.98	59.4	58.9783	52	-1	238	0	0	3	10	10	0	10	1	1	5	1	1	2	3	4	5	6	7	8	9	10	11	12	5	0
Average			4398.72	208.562	4.17017	2.51562

## Sheet: AGES_0mM_Male
Treatment	DFM	Chamber	Licks	Events	MeanDuration	MedDuration	MeanTimeBtw	MedTimeBtw	MeanInt	MedianInt	MinInt	MaxInt	StartMin	EndMin	BaselineWindowMin	FeedingThreshold	FeedingMinimum	TastingLow	TastingHigh	FeedingMinEvents	TastingMinEvents	SamplesSec	ChamberSize	Ch1	Ch2	Ch3	Ch4	Ch5	Ch6	Ch7	Ch8	Ch9	Ch10	Ch11	Ch12	Link.Gap	PI.Multiplier
0mM_male	4	1	3847	259	3.41544	2.6	330.178	20.6	50.5159	38	-9	310	0	0	3	10	10	0	10	1	1	5	1	1	2	3	4	5	6	7	8	9	10	11	12	5	0
0mM_male	4	2	2457	210	2.59619	2	406.898	31.4	49.9442	35	0	270	0	0	3	10	10	0	10	1	1	5	1	1	2	3	4	5	6	7	8	9	10	11	12	5	0
0mM_male	4	3	1539	115	2.98435	2	741.874	26.1	41.7587	32	-1	190	0	0	3	10	10	0	10	1	1	5	1	1	2	3	4	5	6	7	8	9	10	11	12	5	0
0mM_male	4	7	33307	762	9.29029	5.4	103.96	6.4	75.5775	75	-93	305	0	0	3	10	10	0	10	1	1	5	1	1	2	3	4	5	6	7	8	9	10	11	12	5	0
0mM_male	4	8	15024	293	4.04431	3.3	102.76	8	38.0837	32	-25	206	0	0	3	10	10	0	10	1	1	5	1	1	2	3	4	5	6	7	8	9	10	11	12	5	0
0mM_male	4	9	21722	503	9.17058	5.4	162.277	16.7	70.6768	67	-55	273	0	0	3	10	10	0	10	1	1	5	1	1	2	3	4	5	6	7	8	9	10	11	12	5	0
0mM_male	5	1	1974	143	2.97343	1.6	597.049	39.9	41.4944	32	-2	144	0	0	3	10	10	0	10	1	1	5	1	1	2	3	4	5	6	7	8	9	10	11	12	5	0
0mM_male	5	2	8294	357	4.86275	4.6	236.492	27.9	53.912	52	0	197	0	0	3	10	10	0	10	1	1	5	1	1	2	3	4	5	6	7	8	9	10	11	12	5	0
0mM_male	5	3	1999	133	3.20902	1.6	641.593	30.8	57.0258	40	0	344	0	0	3	10	10	0	10	1	1	5	1	1	2	3	4	5	6	7	8	9	10	11	12	5	0
0mM_male	5	7	10804	342	6.76199	4	245.153	18.8	53.847	49	-40	203	0	0	3	10	10	0	10	1	1	5	1	1	2	3	4	5	6	7	8	9	10	11	12	5	0
0mM_male	5	8	20490	452	9.86991	5.3	180.881	5.2	55.4312	52	-74	233	0	0	3	10	10	0	10	1	1	5	1	1	2	3	4	5	6	7	8	9	10	11	12	5	0
0mM_male	5	9	88	11	1.63636	1.2	7198.52	212.9	20	18	6	51	0	0	3	10	10	0	10	1	1	5	1	1	2	3	4	5	6	7	8	9	10	11	12	5	0
0mM_male	6	1	3142	239	3.00251	1.8	357.012	25.6	35.4509	28	-1	280	0	0	3	10	10	0	10	1	1	5	1	1	2	3	4	5	6	7	8	9	10	11	12	5	0
0mM_male	6	2	4799	344	3.10465	2.2	247.34	27.4	35.283	28	-1	197	0	0	3	10	10	0	10	1	1	5	1	1	2	3	4	5	6	7	8	9	10	11	12	5	0
0mM_male	6	3	6639	316	4.6462	3.8	267.925	23.2	39.6367	32	-1	581	0	0	3	10	10	0	10	1	1	5	1	1	2	3	4	5	6	7	8	9	10	11	12	5	0
0mM_male	6	7	34739	94	8.06879	5.2	86.7813	5.4	66.3613	64	-81	665	0	0	3	10	10	0	10	1	1	5	1	1	2	3	4	5	6	7	8	9	10	11	12	5	0
0mM_male	6	8	26789	107	6.93027	5.4	97.5526	4.4	49.6262	48	-38	574	0	0	3	10	10	0	10	1	1	5	1	1	2	3	4	5	6	7	8	9	10	11	12	5	0
0mM_male	6	9	30079	286	6.04597	3.8	73.0084	4.4	43.595	40	-54	245	0	0	3	10	10	0	10	1	1	5	1	1	2	3	4	5	6	7	8	9	10	11	12	5	0
0mM_male	1	4	18824	379	10.5789	4.6	217.386	4.6	116.357	111	-156	535	0	0	3	10	10	0	10	1	1	5	1	1	2	3	4	5	6	7	8	9	10	11	12	5	0
0mM_male	1	5	20561	126	4.55228	3.4	85.073	6.1	49.6849	45	-26	290	0	0	3	10	10	0	10	1	1	5	1	1	2	3	4	5	6	7	8	9	10	11	12	5	0
0mM_male	1	6	57159	133	6.61819	3.8	38.7867	3.4	58.3212	51	-111	298	0	0	3	10	10	0	10	1	1	5	1	1	2	3	4	5	6	7	8	9	10	11	12	5	0
0mM_male	1	10	10026	402	5.31343	4.8	209.089	39	67.0077	60	-1	286	0	0	3	10	10	0	10	1	1	5	1	1	2	3	4	5	6	7	8	9	10	11	12	5	0
0mM_male	1	11	3388	168	4.22619	3.8	507.034	26.2	94.3279	79	-1	392	0	0	3	10	10	0	10	1	1	5	1	1	2	3	4	5	6	7	8	9	10	11	12	5	0
0mM_male	1	12	4704	181	5.4011	4.8	469.347	35	81.0751	77	-1	392	0	0	3	10	10	0	10	1	1	5	1	1	2	3	4	5	6	7	8	9	10	11	12	5	0
0mM_male	2	4	17320	467	7.71692	5.4	176.912	18.8	79.5671	74	-55	313	0	0	3	10	10	0	10	1	1	5	1	1	2	3	4	5	6	7	8	9	10	11	12	5	0
0mM_male	2	5	636	38	3.41053	2.9	2212.03	81	57.7238	52	0	238	0	0	3	10	10	0	10	1	1	5	1	1	2	3	4	5	6	7	8	9	10	11	12	5	0
0mM_male	2	6	9334	258	7.52248	4.9	326.092	14.4	73.261	67	-54	334	0	0	3	10	10	0	10	1	1	5	1	1	2	3	4	5	6	7	8	9	10	11	12	5	0
0mM_male	2	10	1649	139	2.4964	1.4	614.654	32.9	60.3983	47	0	258	0	0	3	10	10	0	10	1	1	5	1	1	2	3	4	5	6	7	8	9	10	11	12	5	0
0mM_male	2	11	182	27	1.41481	0.8	3084.3	406.8	31.3246	27	0	121	0	0	3	10	10	0	10	1	1	5	1	1	2	3	4	5	6	7	8	9	10	11	12	5	0
0mM_male	2	12	1003	175	1.18514	0.8	489.723	32.8	36.2575	30	0	133	0	0	3	10	10	0	10	1	1	5	1	1	2	3	4	5	6	7	8	9	10	11	12	5	0
0mM_male	3	4	46777	142	7.07854	5	53.4727	3.2	55.6321	50	-54	369	0	0	3	10	10	0	10	1	1	5	1	1	2	3	4	5	6	7	8	9	10	11	12	5	0
0mM_male	3	5	45609	47	5.06345	3.2	37.0236	3.2	42.0009	40	-39	253	0	0	3	10	10	0	10	1	1	5	1	1	2	3	4	5	6	7	8	9	10	11	12	5	0
0mM_male	3	6	75535	72	7.94717	5	34.5344	3.6	56.2558	54	-62	271	0	0	3	10	10	0	10	1	1	5	1	1	2	3	4	5	6	7	8	9	10	11	12	5	0
0mM_male	3	10	3443	150	4.952	4.2	567.264	62.8	56.8511	48	0	299	0	0	3	10	10	0	10	1	1	5	1	1	2	3	4	5	6	7	8	9	10	11	12	5	0
0mM_male	3	11	3	1	0.6	0.6	43199.5	43199.5	32.3333	37	17	43	0	0	3	10	10	0	10	1	1	5	1	1	2	3	4	5	6	7	8	9	10	11	12	5	0
0mM_male	3	12	1265	69	4.01159	3	1230.33	63.8	60.6293	44	-1	258	0	0	3	10	10	0	10	1	1	5	1	1	2	3	4	5	6	7	8	9	10	11	12	5	0
Averages			16031.1	233.176	5.30782	3.58235

## Sheet: AGES_10mM_Male
Treatment	DFM	Chamber	Licks	Events	MeanDuration	MedDuration	MeanTimeBtw	MedTimeBtw	MeanInt	MedianInt	MinInt	MaxInt	StartMin	EndMin	BaselineWindowMin	FeedingThreshold	FeedingMinimum	TastingLow	TastingHigh	FeedingMinEvents	TastingMinEvents	SamplesSec	ChamberSize	Ch1	Ch2	Ch3	Ch4	Ch5	Ch6	Ch7	Ch8	Ch9	Ch10	Ch11	Ch12	Link.Gap	PI.Multiplier
10mM_male	1	1	3476	201	3.60498	3.2	424.133	28.5	86.5976	71	-2	345	0	0	3	10	10	0	10	1	1	5	1	1	2	3	4	5	6	7	8	9	10	11	12	5	0
10mM_male	1	2	3341	180	3.88444	3.2	473.482	35.2	84.4007	76	-1	294	0	0	3	10	10	0	10	1	1	5	1	1	2	3	4	5	6	7	8	9	10	11	12	5	0
10mM_male	1	3	4539	229	4.07162	3.2	371.596	35.7	83.4599	76	-1	334	0	0	3	10	10	0	10	1	1	5	1	1	2	3	4	5	6	7	8	9	10	11	12	5	0
10mM_male	1	7	6450	187	7.17112	4	452.438	37.4	89.3371	77	-27	474	0	0	3	10	10	0	10	1	1	5	1	1	2	3	4	5	6	7	8	9	10	11	12	5	0
10mM_male	1	8	5966	150	8.132	5.4	564.103	72.4	133.319	132	0	406	0	0	3	10	10	0	10	1	1	5	1	1	2	3	4	5	6	7	8	9	10	11	12	5	0
10mM_male	1	9	5900	196	6.27551	5.2	432.332	42.8	124.357	113	-1	461	0	0	3	10	10	0	10	1	1	5	1	1	2	3	4	5	6	7	8	9	10	11	12	5	0
10mM_male	2	1	179	11	3.47273	0.8	7196.75	3792.2	51.1885	17	0	332	0	0	3	10	10	0	10	1	1	5	1	1	2	3	4	5	6	7	8	9	10	11	12	5	0
10mM_male	2	2	0	0	NA	NA	86399.2	86399.2	NA	NA	NA	NA	0	0	3	10	10	0	10	1	1	5	1	1	2	3	4	5	6	7	8	9	10	11	12	5	0
10mM_male	2	3	454	93	1.01075	0.8	918.14	196.9	36.9809	31	0	159	0	0	3	10	10	0	10	1	1	5	1	1	2	3	4	5	6	7	8	9	10	11	12	5	0
10mM_male	2	7	6313	268	4.99179	3.4	316.213	20.2	78.434	69	-1	416	0	0	3	10	10	0	10	1	1	5	1	1	2	3	4	5	6	7	8	9	10	11	12	5	0
10mM_male	2	8	6596	225	6.10933	4.2	376.215	44.1	79.5583	74	-45	296	0	0	3	10	10	0	10	1	1	5	1	1	2	3	4	5	6	7	8	9	10	11	12	5	0
10mM_male	2	9	3433	219	3.24932	2.2	389.489	41.3	59.7788	53	0	266	0	0	3	10	10	0	10	1	1	5	1	1	2	3	4	5	6	7	8	9	10	11	12	5	0
10mM_male	3	1	2886	175	3.656	3.2	487.275	23.4	55.2535	52	0	264	0	0	3	10	10	0	10	1	1	5	1	1	2	3	4	5	6	7	8	9	10	11	12	5	0
10mM_male	3	2	2235	172	2.78837	1.8	496.651	14.4	56.6372	52	-1	243	0	0	3	10	10	0	10	1	1	5	1	1	2	3	4	5	6	7	8	9	10	11	12	5	0
10mM_male	3	3	1702	200	1.826	1	428.035	35	39.5088	28	0	209	0	0	3	10	10	0	10	1	1	5	1	1	2	3	4	5	6	7	8	9	10	11	12	5	0
10mM_male	3	7	5579	86	13.2721	10.8	979.986	33.4	96.8237	94	-42	464	0	0	3	10	10	0	10	1	1	5	1	1	2	3	4	5	6	7	8	9	10	11	12	5	0
10mM_male	3	8	10044	175	11.9429	8.6	479.035	32.5	102.757	99	-77	353	0	0	3	10	10	0	10	1	1	5	1	1	2	3	4	5	6	7	8	9	10	11	12	5	0
10mM_male	3	9	7048	169	8.54438	6.8	499.742	74.5	99.197	99	-1	324	0	0	3	10	10	0	10	1	1	5	1	1	2	3	4	5	6	7	8	9	10	11	12	5	0
10mM_male	4	4	7469	252	6.31984	4.4	335.205	17.8	62.2271	60	-21	438	0	0	3	10	10	0	10	1	1	5	1	1	2	3	4	5	6	7	8	9	10	11	12	5	0
10mM_male	4	5	9977	185	11.1276	8	453.445	37.1	90.9048	94	-34	281	0	0	3	10	10	0	10	1	1	5	1	1	2	3	4	5	6	7	8	9	10	11	12	5	0
10mM_male	4	6	14469	389	7.92391	5.4	213.633	24.1	72.0951	72	-46	600	0	0	3	10	10	0	10	1	1	5	1	1	2	3	4	5	6	7	8	9	10	11	12	5	0
10mM_male	4	10	3376	148	5.09189	4.4	574.804	44.8	47.4987	42	0	189	0	0	3	10	10	0	10	1	1	5	1	1	2	3	4	5	6	7	8	9	10	11	12	5	0
10mM_male	4	11	3347	82	8.37317	5	1032.68	101.8	62.0341	60	0	392	0	0	3	10	10	0	10	1	1	5	1	1	2	3	4	5	6	7	8	9	10	11	12	5	0
10mM_male	4	12	3316	156	4.71923	3.8	545.625	33.4	51.1127	50	0	206	0	0	3	10	10	0	10	1	1	5	1	1	2	3	4	5	6	7	8	9	10	11	12	5	0
10mM_male	5	4	5135	375	2.8256	1.4	226.969	35.4	57.4664	54	-1	213	0	0	3	10	10	0	10	1	1	5	1	1	2	3	4	5	6	7	8	9	10	11	12	5	0
10mM_male	5	5	786	124	1.32097	0.8	689.888	78.4	32.7033	25	0	160	0	0	3	10	10	0	10	1	1	5	1	1	2	3	4	5	6	7	8	9	10	11	12	5	0
10mM_male	5	6	3703	302	2.51987	1.6	282.636	39.8	48.103	46	-1	151	0	0	3	10	10	0	10	1	1	5	1	1	2	3	4	5	6	7	8	9	10	11	12	5	0
10mM_male	5	10	527	150	0.782667	0.4	571.407	84.4	16.3509	14	0	70	0	0	3	10	10	0	10	1	1	5	1	1	2	3	4	5	6	7	8	9	10	11	12	5	0
10mM_male	5	11	549	33	3.62424	1.4	2537.65	82.4	42.5117	32	0	210	0	0	3	10	10	0	10	1	1	5	1	1	2	3	4	5	6	7	8	9	10	11	12	5	0
10mM_male	5	12	218	55	0.829091	0.4	1542.04	185.6	25.6535	19	0	126	0	0	3	10	10	0	10	1	1	5	1	1	2	3	4	5	6	7	8	9	10	11	12	5	0
10mM_male	6	4	1549	115	2.86783	1.4	741.983	53.1	41.0849	37	0	165	0	0	3	10	10	0	10	1	1	5	1	1	2	3	4	5	6	7	8	9	10	11	12	5	0
10mM_male	6	5	7446	292	5.24315	2.4	290.647	28.4	83.5278	73	-63	326	0	0	3	10	10	0	10	1	1	5	1	1	2	3	4	5	6	7	8	9	10	11	12	5	0
10mM_male	6	6	2335	153	3.28758	2.6	557.771	63.1	49.8302	48	-1	238	0	0	3	10	10	0	10	1	1	5	1	1	2	3	4	5	6	7	8	9	10	11	12	5	0
10mM_male	6	10	921	67	2.98806	2.4	1267.64	138.4	35.4705	25	0	185	0	0	3	10	10	0	10	1	1	5	1	1	2	3	4	5	6	7	8	9	10	11	12	5	0
10mM_male	6	11	1268	120	2.26833	1.1	711.798	80.8	53.928	46	-1	224	0	0	3	10	10	0	10	1	1	5	1	1	2	3	4	5	6	7	8	9	10	11	12	5	0
10mM_male	6	12	91	3	6.13333	3.6	21595.3	9305.3	48.4239	58	7	89	0	0	3	10	10	0	10	1	1	5	1	1	2	3	4	5	6	7	8	9	10	11	12	5	0
Averages			4074.94	169.629	4.92142	3.38
