# Supplementary material for: Auxin exposure disrupts feeding behavior and fatty acid metabolism in adult Drosophila
Source: eLife. 2024 Jan 19;12:RP91953. doi: 10.7554/eLife.91953 (PMC10945601; doi:10.7554/eLife.91953)
Supplement: Figure 2—figure supplement 2—source data 1. [file elife-91953-fig2-figsupp2-data1.xlsx]

## Sheet: Sheet1
																Stanbio Kit
Plate format:	96 Wells															After eclosion, w1118 adult male and female (sexed by sex comb) flies were kept in 0 mM or 10mM Auxin food
																5 days old adult flies were used for the experiment.
Absorbances Filter 1: 540nm																5 flies/vial
																350 uL 1xPBST were used to homogenized
	Technical replicate 1				Technical replicate 2							standard calculation				10 flies/vial were used for body-weight
	F_(-)auxin	M_(-)auxin	F_(+)auxin	M_(+)auxin	F_(-)auxin	M_(-)auxin	F_(+)auxin	M_(+)auxin	std1	std2		Avg std	conc (mg/ml)	abs
Set 1	0.305	0.188	0.235	0.153	0.3	0.185	0.232	0.153	0.07	0.069		0.0695	0	0
	0.311	0.174	0.24	0.166	0.29	0.174	0.24	0.163	0.078	0.079		0.0785	0.03	0.009
	0.264	0.181	0.232	0.175	0.25	0.177	0.224	0.174	0.088	0.088		0.088	0.06	0.0185
	0.304	0.178	0.213	0.176	0.294	0.174	0.212	0.174	0.108	0.105		0.1065	0.125	0.037
Set 2	0.273	0.164	0.214	0.167	0.261	0.162	0.213	0.167	0.143	0.142		0.1425	0.25	0.073
	0.296	0.185	0.227	0.163	0.3	0.186	0.215	0.16	0.22	0.218		0.219	0.5	0.1495
	0.319	0.162	0.237	0.16	0.305	0.162	0.23	0.159	0.377	0.365		0.371	1	0.3015
	0.289	0.169	0.198	0.167	0.289	0.173	0.195	0.166	0.666	0.651		0.6585	2	0.589
Avg Samples	F_(-)auxin	M_(-)auxin	F_(+)auxin	M_(+)auxin
	0.3025	0.1865	0.2335	0.153
	0.3005	0.174	0.24	0.1645
	0.257	0.179	0.228	0.1745
	0.299	0.176	0.2125	0.175
	0.267	0.163	0.2135	0.167
	0.298	0.1855	0.221	0.1615
	0.312	0.162	0.2335	0.1595
	0.289	0.171	0.1965	0.1665
Conc from equation	F_(-)auxin	M_(-)auxin	F_(+)auxin	M_(+)auxin
	1.02133	0.628639	0.787745	0.515234
	1.01456	0.586324	0.809749	0.554164
	0.867299	0.60325	0.769127	0.588016
	1.00948	0.593094	0.716655	0.589709
	0.901151	0.549086	0.720041	0.562627
	1.00609	0.625254	0.74543	0.544008
	1.05349	0.545701	0.787745	0.537238
	0.975626	0.576168	0.662492	0.560934		10 flies/tube, then divided by 10 to get body-weight per fly
						body weight per fly
350 ul 1xPBST used	F_(-)auxin	M_(-)auxin	F_(+)auxin	M_(+)auxin		F_(-)auxin	M_(-)auxin	F_(+)auxin	M_(+)auxin
5 flies/ tube	0.0714929	0.0440047	0.0551422	0.0360664		0.97	0.72	0.93	0.77
	0.071019	0.0410427	0.0566825	0.0387915		0.97	0.72	0.93	0.77
	0.0607109	0.0422275	0.0538389	0.0411611		0.9	0.7	0.95	0.7
	0.0706635	0.0415166	0.0501659	0.0412796		0.9	0.7	0.95	0.7
	0.0630806	0.038436	0.0504028	0.0393839		0.87	0.64	0.88	0.74
	0.0704265	0.0437678	0.0521801	0.0380806		0.87	0.64	0.88	0.74
	0.0737441	0.0381991	0.0551422	0.0376066		0.96	0.69	0.93	0.73
	0.0682938	0.0403318	0.0463744	0.0392654		0.96	0.69	0.93	0.73
percent body fat	F_(-)auxin	M_(-)auxin	F_(+)auxin	M_(+)auxin
	7.3704	6.11177	5.92927	4.68394
	7.32154	5.70037	6.09489	5.03785
	6.74566	6.0325	5.66725	5.88016
	7.8515	5.93094	5.28062	5.89709
	7.25064	6.00563	5.7276	5.32215
	8.095	6.83871	5.92956	5.14602
	7.68167	5.53609	5.92927	5.15159
	7.11394	5.84518	4.9865	5.37882
