# Supplementary material for: Auxin exposure disrupts feeding behavior and fatty acid metabolism in adult Drosophila
Source: eLife. 2024 Jan 19;12:RP91953. doi: 10.7554/eLife.91953 (PMC10945601; doi:10.7554/eLife.91953)
Supplement: Figure 2—figure supplement 2—source data 2. [file elife-91953-fig2-figsupp2-data2.xlsx]

## Sheet: Sheet1
			(+) auxin = 10mM Auxin. (-) auxin = 0mM auxin
			(+/-) auxin_d10 = flies were on (+) auxin food for 5 days after eclosion, then kept back to (-) auxin food for another 5 days, and then collected these (+/-) auxin_d10 flies
			3 flies/sample (last time we used 5 flies/sample). 8 samples/treatment.
w1118 flies			150uL 1xPBST was used to make homoginate (last time we used 350uL 1xPBST)
			There is no technical replicate this time like last time
Plate format:	96 Wells
Absorbances Filter 1: 540nm
											standard calculation
	F_(-)auxin_day 5	M_(-)auxin_day 5	F_(+)auxin_day 5	M_(+)auxin_day 5	F_(-)auxin_day 10	M_(-)auxin_day 10	F_(+)auxin_day 10	M_(+)auxin_day 10	F_(+/-)auxin_day10	M_(+/-)auxin_day10	std1	std2	avg std	conc (mg/ml)	abs
set1	0.434	0.217	0.359	0.205	0.378	0.208	0.302	0.199	0.273	0.235	0.055	0.056	0.0555	0	0
	0.361	0.223	0.296	0.197	0.351	0.211	0.268	0.199	0.388	0.192	0.064	0.064	0.064	0.03	0.0085
	0.387	0.204	0.32	0.182	0.375	0.227	0.253	0.234	0.285	0.229	0.074	0.074	0.074	0.06	0.0185
	0.41	0.219	0.3	0.191	0.345	0.224	0.297	0.191	0.315	0.208	0.092	0.092	0.092	0.125	0.0365
set2	0.403	0.213	0.311	0.182	0.376	0.207	0.296	0.203	0.33	0.176	0.13	0.131	0.1305	0.25	0.075
	0.392	0.205	0.329	0.209	0.414	0.173	0.317	0.23	0.3	0.185	0.204	0.209	0.2065	0.5	0.151
	0.41	0.215	0.257	0.196	0.355	0.241	0.244	0.18	0.365	0.22	0.353	0.359	0.356	1	0.3005
	0.399	0.218	0.32	0.187	0.365	0.226	0.247	0.198	0.298	0.208	0.647	0.66	0.6535	2	0.598
Conc from equation	F_(-)auxin_day 5	M_(-)auxin_day 5	F_(+)auxin_day 5	M_(+)auxin_day 5	F_(-)auxin_day 10	M_(-)auxin_day 10	F_(+)auxin_day 10	M_(+)auxin_day 10	F_(+/-)auxin_day10	M_(+/-)auxin_day10
	1.44938	0.724357	1.1988	0.684263	1.26228	0.694287	1.00835	0.664217	0.91146	0.784497
	1.20548	0.744404	0.988306	0.657534	1.17207	0.70431	0.894754	0.664217	1.29569	0.640829
	1.29235	0.680922	1.06849	0.607417	1.25226	0.757768	0.844637	0.781156	0.951554	0.76445
	1.36919	0.731039	1.00167	0.637487	1.15202	0.747745	0.991647	0.637487	1.05179	0.694287
	1.34581	0.710992	1.03842	0.607417	1.2556	0.690946	0.988306	0.677581	1.1019	0.587371
	1.30905	0.684263	1.09856	0.697628	1.38256	0.577347	1.05847	0.767792	1.00167	0.617441
	1.36919	0.717675	0.858002	0.654193	1.18543	0.804544	0.814567	0.600735	1.21884	0.73438
	1.33244	0.727698	1.06849	0.624123	1.21884	0.754427	0.824591	0.660875	0.994988	0.694287
150 ul 1xPBST used	F_(-)auxin_day 5	M_(-)auxin_day 5	F_(+)auxin_day 5	M_(+)auxin_day 5	F_(-)auxin_day 10	M_(-)auxin_day 10	F_(+)auxin_day 10	M_(+)auxin_day 10	F_(+/-)auxin_day10	M_(+/-)auxin_day10
3 flies/ tube	0.0724691	0.0362178	0.0599399	0.0342132	0.0631139	0.0347143	0.0504176	0.0332108	0.045573	0.0392249
	0.060274	0.0372202	0.0494153	0.0328767	0.0586034	0.0352155	0.0447377	0.0332108	0.0647845	0.0320414
	0.0646174	0.0340461	0.0534247	0.0303709	0.0626128	0.0378884	0.0422319	0.0390578	0.0475777	0.0382225
	0.0684597	0.036552	0.0500835	0.0318744	0.0576011	0.0373872	0.0495824	0.0318744	0.0525894	0.0347143
	0.0672903	0.0355496	0.0519211	0.0303709	0.0627798	0.0345473	0.0494153	0.0338791	0.0550952	0.0293685
	0.0654527	0.0342132	0.0549282	0.0348814	0.069128	0.0288674	0.0529235	0.0383896	0.0500835	0.030872
	0.0684597	0.0358837	0.0429001	0.0327097	0.0592716	0.0402272	0.0407284	0.0300368	0.0609422	0.036719
	0.0666221	0.0363849	0.0534247	0.0312061	0.0609422	0.0377213	0.0412295	0.0330438	0.0497494	0.0347143
6 flies/tube, then divided by 6 to get body-weight per fly
body weight per fly	F_(-)auxin_day 5	M_(-)auxin_day 5	F_(+)auxin_day 5	M_(+)auxin_day 5	F_(-)auxin_day 10	M_(-)auxin_day 10	F_(+)auxin_day 10	M_(+)auxin_day 10	F_(+/-)auxin_day10	M_(+/-)auxin_day10
	1.01667	0.75	1.05	0.75	1.03333	0.7	1.06667	0.716667	1.05	0.7
	1.01667	0.75	1.05	0.75	1.03333	0.7	1.06667	0.716667	1.05	0.7
	1.01667	0.733333	1.05	0.7	1.08333	0.733333	1.03333	0.766667	1.13333	0.733333
	1.01667	0.733333	1.05	0.7	1.08333	0.733333	1.03333	0.766667	1.13333	0.733333
	1	0.733333	1.05	0.716667	1.03333	0.7	1.08333	0.75	1	0.766667
	1	0.733333	1.05	0.716667	1.03333	0.7	1.08333	0.75	1	0.766667
	1.03333	0.733333	1.03333	0.733333	1.03333	0.733333	1.06667	0.766667	1.05	0.75
	1.03333	0.733333	1.03333	0.733333	1.03333	0.733333	1.06667	0.766667	1.05	0.75
percent body fat	F_(-)auxin_day 5	M_(-)auxin_day 5	F_(+)auxin_day 5	M_(+)auxin_day 5	F_(-)auxin_day 10	M_(-)auxin_day 10	F_(+)auxin_day 10	M_(+)auxin_day 10	F_(+/-)auxin_day10	M_(+/-)auxin_day10
	7.12811	4.82905	5.70856	4.56176	6.1078	4.95919	4.72665	4.63407	4.34029	5.60355
	5.92859	4.96269	4.70622	4.38356	5.6713	5.03079	4.19416	4.63407	6.16995	4.57735
	6.35581	4.64265	5.08806	4.3387	5.77964	5.1666	4.08696	5.0945	4.19803	5.21216
	6.73374	4.98436	4.76986	4.55348	5.31702	5.09826	4.79829	4.15753	4.64024	4.73377
	6.72903	4.84767	4.94487	4.2378	6.07547	4.93533	4.56141	4.51721	5.50952	3.83068
	6.54527	4.66543	5.23125	4.86717	6.6898	4.12391	4.88525	5.11861	5.00835	4.02679
	6.62514	4.89324	4.15162	4.46041	5.73596	5.48553	3.81828	3.91784	5.80402	4.89587
	6.4473	4.96158	5.17013	4.25538	5.89763	5.14382	3.86527	4.31006	4.73804	4.62858
