# Supplementary material for: Auxin exposure disrupts feeding behavior and fatty acid metabolism in adult Drosophila
Source: eLife. 2024 Jan 19;12:RP91953. doi: 10.7554/eLife.91953 (PMC10945601; doi:10.7554/eLife.91953)
Supplement: Figure 2—source data 1. [file elife-91953-fig2-data1.xlsx]

## Sheet: Sheet1
						Sample ID	Plate003-E1	Plate003-E2	Plate003-E3	Plate003-E4	Plate003-E5	Plate003-E6	Plate003-E7	Plate003-E8	Plate003-E9	Plate003-E10	Plate003-E11	Plate003-E12	Plate003-F1	Plate003-F2	Plate003-F3	Plate003-F4	Plate003-F5	Plate003-F6	Plate003-F7	Plate003-F8	Plate003-F9	Plate003-F10	Plate003-F11	Plate003-F12	Plate003-A1	Plate003-A2	Plate003-A3	Plate003-A4	Plate003-A5	Plate003-A6	Plate003-A7	Plate003-A8	Plate003-A9	Plate003-A10	Plate003-A11	Plate003-A12	Plate003-B2	Plate003-B3	Plate003-B4	Plate003-B5	Plate003-B6	Plate003-B7	Plate003-B8
						Sample Type	Whole Drosophila melanogaster	Whole Drosophila melanogaster	Whole Drosophila melanogaster	Whole Drosophila melanogaster	Whole Drosophila melanogaster	Whole Drosophila melanogaster	Whole Drosophila melanogaster	Whole Drosophila melanogaster	Whole Drosophila melanogaster	Whole Drosophila melanogaster	Whole Drosophila melanogaster	Whole Drosophila melanogaster	Whole Drosophila melanogaster	Whole Drosophila melanogaster	Whole Drosophila melanogaster	Whole Drosophila melanogaster	Whole Drosophila melanogaster	Whole Drosophila melanogaster	Whole Drosophila melanogaster	Whole Drosophila melanogaster	Whole Drosophila melanogaster	Whole Drosophila melanogaster	Whole Drosophila melanogaster	Whole Drosophila melanogaster	Whole Drosophila melanogaster	Whole Drosophila melanogaster	Whole Drosophila melanogaster	Whole Drosophila melanogaster	Whole Drosophila melanogaster	Whole Drosophila melanogaster	Whole Drosophila melanogaster	Whole Drosophila melanogaster	Whole Drosophila melanogaster	Whole Drosophila melanogaster	Whole Drosophila melanogaster	Whole Drosophila melanogaster	Whole Drosophila melanogaster	Whole Drosophila melanogaster	Whole Drosophila melanogaster	Whole Drosophila melanogaster	Whole Drosophila melanogaster	Whole Drosophila melanogaster	Whole Drosophila melanogaster
						Sample Group	AID-tub-AID 0 mM Female	AID-tub-AID 0 mM Female	AID-tub-AID 0 mM Female	AID-tub-AID 0 mM Female	AID-tub-AID 0 mM Female	AID-tub-AID 0 mM Female	AID-tub-AID 0 mM Male	AID-tub-AID 0 mM Male	AID-tub-AID 0 mM Male	AID-tub-AID 0 mM Male	AID-tub-AID 0 mM Male	AID-tub-AID 0 mM Male	AID-tub-AID 10 mM Female	AID-tub-AID 10 mM Female	AID-tub-AID 10 mM Female	AID-tub-AID 10 mM Female	AID-tub-AID 10 mM Female	AID-tub-AID 10 mM Female	AID-tub-AID 10 mM Male	AID-tub-AID 10 mM Male	AID-tub-AID 10 mM Male	AID-tub-AID 10 mM Male	AID-tub-AID 10 mM Male	AID-tub-AID 10 mM Male	OreR 0 mM Female	OreR 0 mM Female	OreR 0 mM Female	OreR 0 mM Female	OreR 0 mM Female	OreR 0 mM Female	OreR 0 mM Male	OreR 0 mM Male	OreR 0 mM Male	OreR 0 mM Male	OreR 0 mM Male	OreR 0 mM Male	OreR 10 mM Female	OreR 10 mM Female	OreR 10 mM Female	OreR 10 mM Female	OreR 10 mM Female	OreR 10 mM Male	OreR 10 mM Male
N.	compound	CmpdID	Pathway	parent	medRt	Polarity	p003_E1_r29	p003_E2_r71	p003_E3_r33	p003_E4_r32	p003_E5_r58	p003_E6_r88	p003_E7_r69	p003_E8_r42	p003_E9_r28	p003_E10_r77	p003_E11_r12	p003_E12_r59	p003_F1_r61	p003_F2_r4	p003_F3_r21	p003_F4_r83	p003_F5_r43	p003_F6_r73	p003_F7_r20	p003_F8_r92	p003_F9_r19	p003_F10_r38	p003_F11_r86	p003_F12_r36	p003_A1_r95	p003_A2_r79	p003_A3_r55	p003_A4_r35	p003_A5_r25	p003_A6_r37	p003_A7_r60	p003_A8_r9	p003_A9_r17	p003_A10_r31	p003_A11_r90	p003_A12_r16	p003_B2_r97	p003_B3_r14	p003_B4_r41	p003_B5_r11	p003_B6_r45	p003_B7_r76	p003_B8_r62
1	alanine	C00041	Amino acids	90.0549	0.168	[M+H]+	127106120	125268064	124107072	136629216	128153984	132763224	111915912	112582888	111202856	105016776	119466408	103467848	185622960	160337520	186473280	137348640	183885392	177151728	142305280	142996240	139157504	125963160	157869072	124816712	106197736	116467176	110584600	106217048	115717344	107593320	105338024	122647864	108698104	107659720	103667520	96543744	143528304	148608512	150365104	152319872	135852416	110629976	97533608
2	arginine	C00062	Amino acids	175.118	0.161	[M+H]+	106397592	110361736	104149064	108704408	110954152	109105256	139432784	116309560	152885968	128391880	108957824	135839936	217415664	185738944	198975152	181658800	217842320	207583760	152684944	154133424	162086384	176426064	194504560	191750544	142595216	145848272	127684760	139526784	108121272	122850472	194346544	155308688	143435968	141972080	137266160	127111808	214926512	243201840	160549760	169909680	154978800	233456080	207423360
3	asparagine	C00152	Amino acids	133.062	0.179	[M+H]+	10475477	10408897	10128384	10376391	10693595	10461572	3.1945e+06	3597268	3.1396e+06	3.41704e+06	2.96673e+06	3.23464e+06	10291360	10665311	10868009	11617255	9684311	10056055	5.64917e+06	5671318	5360416	5.51781e+06	6.07668e+06	5.09037e+06	5.56562e+06	6427710	5.99671e+06	6.35215e+06	9712147	8377174	4054871	3.37844e+06	3085444	3.45357e+06	3530988	3405481	11157850	13183024	11247424	9441232	12144177	9081882	8307104
4	aspartate	C00049	Amino acids	134.045	0.194	[M+H]+	12441772	12159659	12458073	12527728	11940188	12589609	7.50138e+06	7.72974e+06	7.4286e+06	7441244	7.96355e+06	6.49543e+06	11826775	12104483	13040819	10786825	11485927	11867845	8806478	8587211	8896704	8822620	10225335	8854375	6859192	7818284	8.12596e+06	7798898	12894748	9675220	7.12492e+06	8.00581e+06	7.4043e+06	7.57229e+06	7.4187e+06	7.74774e+06	9999016	11699645	10734591	10941856	12075704	8934120	8873823
5	cysteine	C00097	Amino acids	122.027	0.253	[M+H]+	17215.8	14969.8	23927.9	13367.1	27036.7	25060.2	11781.4	7949.37	14028.7	5818.93	4952.74	6709.85	42758.9	18352.2	26483	20230.2	39432.3	25132.1	11962.6	10342	20755.8	46116.8	18473.3	9512.71	31268	47199.6	50307.2	76311.1	68553.5	88264.2	30799.5	8716.27	38701.7	9639.9	47198.6	39636	9424.8	14410	41137.4	33190.9	41890.9	38561.7	41265
6	glutamate	C00025	Amino acids	148.061	0.189	[M+H]+	70776520	71603104	66877392	73017816	72569960	70943784	43290748	37442808	42077132	40235376	41538228	36735284	45546412	41645552	47237244	38715556	42806524	41766068	36662240	37726140	35728644	37492532	43468908	37343872	59364420	65580052	70748872	69836408	71844600	63735596	45599780	46317792	45992468	45850448	45804464	44972468	39051932	42262416	38299976	40866816	38624512	32838248	30541272
7	glutamine	C00064	Amino acids	147.077	0.184	[M+H]+	101193400	104477440	92467328	113315800	112214408	114630168	65433152	62674932	63325556	59880624	60191984	57475140	118251584	102464408	124189272	99288616	108058536	111773528	65487340	70909528	69404272	65450244	80943880	59993356	65784276	66257412	62617588	64134796	89076888	81294712	58277164	56444748	56141796	61981468	51888908	52087532	82147576	85857368	94920800	84899712	95070560	52991844	50755348
8	glycine	C00037	Amino acids	74.0234	0.257	[M-H]-	3783738	3.45161e+06	2.81269e+06	4169998	3.90192e+06	3551457	1.44129e+06	1.42175e+06	1.62952e+06	1.36631e+06	1.19213e+06	1332202	2.91275e+06	2.25008e+06	2676754	2340802	2897620	3.12779e+06	1.72053e+06	1.81625e+06	1.69388e+06	1916012	2120331	1.63072e+06	3840171	3.83881e+06	4.36225e+06	3.84651e+06	4.82632e+06	4739815	1.91014e+06	1.30382e+06	1.52291e+06	1.78559e+06	1.76146e+06	1614013	3.50306e+06	3.28655e+06	3696132	2.91976e+06	3518612	2.55112e+06	2459085
9	histidine	C00135	Amino acids	156.078	0.173	[M+H]+	91742104	117735688	101074432	106370168	99390584	89327064	141974176	120264536	132849696	93806824	126018200	111531392	95748032	61036336	85235816	67448848	94325080	108885720	158075696	166037312	151704656	145797568	257436352	143070864	67315432	74837840	89871320	94495160	119454248	129865128	205186480	197048624	177012832	195086592	213137152	197011408	95572760	106217160	94648344	101141912	92022712	246496464	228960304
10	leucine	C00123	Amino acids	132.102	0.301	[M+H]+	78266816	76458952	72222088	69713256	73228920	73098552	14776945	11743936	14502400	10400533	10656649	12339115	85892824	49281684	63341968	52572084	78419928	84693808	40534708	43445332	48510668	40000612	53447340	34206704	64216956	89339864	78221240	70909336	43332584	50832160	15255496	14563369	13715496	14131256	13717487	10329609	92533032	85101664	90611176	76007064	79706040	56729356	47453100
11	isoleucine	C00407	Amino acids	132.102	0.182	[M+H]+	35743644	32429968	31656038	35093180	32835962	30011098	8753199	8891715	9912455	7.21186e+06	8748180	8531797	36675956	26010654	32386534	22127608	33052782	31929856	23275762	28089232	27407648	27153162	30866810	25358296	23891640	32661632	32976498	30536058	21139754	20475542	9456391	8.01557e+06	9819220	6700750	8189970	7.00289e+06	42123424	40632812	45011876	36324008	40154532	38004564	31727686
12	lysine	C00047	Amino acids	147.112	0.154	[M+H]+	24875242	33296536	29691686	29657536	31711082	26550418	12875520	11889075	13681280	11779501	10286670	14373171	46824416	38219004	36250164	40450804	45660556	40126084	18409726	19689720	21735446	23558552	25962408	24528934	28518528	31398416	38153252	33739636	25401366	25186438	14314591	12130831	12273111	10874402	10631947	10347627	29945752	30000440	36152300	27811824	27690962	28391264	26295558
13	methionine	C00073	Amino acids	150.057	0.221	[M+H]+	4214704	4.43445e+06	4069970	4.15673e+06	3.88305e+06	4.14021e+06	2.51712e+06	2439212	2668486	1.96563e+06	2312938	2.12745e+06	5.38311e+06	4331608	4.1894e+06	2.63904e+06	6149532	6223960	2.65128e+06	2529582	3.03223e+06	2.53447e+06	2803485	2.68199e+06	4.66339e+06	4.7646e+06	6.27283e+06	6391876	3189678	4.32422e+06	3305656	2.94401e+06	3.55267e+06	2.7978e+06	2803988	2.70209e+06	5.66186e+06	6.15956e+06	4.86275e+06	4855831	5416924	4.6625e+06	4.61268e+06
14	phenylalanine	C00079	Amino acids	166.086	0.372	[M+H]+	39384908	34422620	36681076	35633956	33990340	35771940	7.29817e+06	5980750	7825828	5169438	5790776	6.27402e+06	45858548	23647594	35631996	24634640	46549344	47221412	20288222	21221078	25012482	19978282	30532406	18058402	29590752	39057168	36358580	34024780	31022274	31568810	12056243	10350777	12029051	12219235	12321165	10187007	68749632	55366140	60440204	47925228	63363084	53783444	44450052
15	proline	C00148	Amino acids	116.07	0.171	[M+H]+	560591360	508743552	532704096	617066944	608576192	577156928	346859488	425660832	439256224	441685888	434610208	407306464	362549376	334902496	397871648	260137584	383624320	357826016	221831184	292267744	255320592	243301440	293949024	257492080	473722784	531603456	581638336	568162816	496986112	423762688	366514784	394335456	360709472	345528032	393460352	448986400	180462672	226428032	177142720	224735920	201013120	118457432	104684832
16	serine	C00065	Amino acids	106.05	0.179	[M+H]+	4.07175e+06	4516372	3.77628e+06	3.87603e+06	3.79839e+06	4.10997e+06	3703556	4.11016e+06	3.65591e+06	3.99188e+06	3497329	3.59583e+06	9119101	6602334	6.96075e+06	6726276	7.65076e+06	6402554	5.88426e+06	6221176	6305940	6.22462e+06	6.79018e+06	4.85003e+06	2.31508e+06	2.60169e+06	2.6326e+06	2.64947e+06	2.90262e+06	2905952	3.08475e+06	2.93769e+06	2.98062e+06	2726864	2796102	2877239	7.09976e+06	9578329	7.60486e+06	7.19374e+06	8109132	9334699	8127740
17	threonine	C00188	Amino acids	120.066	0.184	[M+H]+	23769186	23257520	22892790	24521562	24628818	25267314	3579426	4.49732e+06	4404902	2.96221e+06	3898700	4.11772e+06	10743983	9203069	12243764	10286423	9347092	10208535	5.60243e+06	5613166	5.96092e+06	4.84755e+06	5.21067e+06	5155268	23342358	25447826	27035974	25978946	30056030	27312038	8703612	8252384	8879356	8677363	7.9131e+06	7475208	16793058	17156558	19316846	14795872	17365050	10073995	9654509
18	tryptophan	C00078	Amino acids	205.096	0.546	[M+H]+	6.69417e+06	6.30994e+06	5.76113e+06	8405364	8.13441e+06	7714124	1.93109e+06	1860709	2.1926e+06	1.60998e+06	1.9733e+06	1.8488e+06	6.40521e+06	4560421	4566476	3537744	5345009	5082793	2.70942e+06	2.9018e+06	2710810	3173953	4330396	2.32295e+06	13861916	14460395	15660728	13594027	15228029	15768153	15323763	13222269	10739162	14223721	15819145	11452613	12687855	13988912	14361352	13549081	14581071	12854691	11065443
19	tyrosine	C00082	Amino acids	180.065	0.248	[M-H]-	7.33624e+06	7938970	6.29498e+06	7833770	7181296	8589098	2890245	2.14746e+06	2.77103e+06	2.15606e+06	2.62881e+06	2.39598e+06	8.14225e+06	6.17733e+06	7.40163e+06	5.99098e+06	7285372	7385930	3852764	4.25802e+06	4321173	3521161	4.93561e+06	3.10017e+06	5.63154e+06	5.10163e+06	5.88343e+06	5.19501e+06	4885100	5.19666e+06	2358336	2.00128e+06	1.96131e+06	1753167	2295066	2264295	6054360	6.17007e+06	5.50632e+06	5.50005e+06	5.6969e+06	4.18107e+06	4.29668e+06
20	valine	C00183	Amino acids	118.086	0.18	[M+H]+	39375164	37530456	35763244	37528348	35457148	32227686	6.99814e+06	7.18552e+06	6.81858e+06	6.12074e+06	6422008	8.11004e+06	32629088	27275590	34043424	24481066	30429290	31257306	28729942	27905302	29068368	26195158	29266310	25668800	36550556	44642716	48683844	42786220	31464506	28050896	13775627	6.79014e+06	8604993	6690768	7403818	5086330	49052548	35472976	53420528	34919408	40131556	34040772	32636280
21	cystine	C00491	Amino acids	241.031	0.161	[M+H]+	9100.55	20189.8	7379.14	16457	9306.73	10255.7	0	8553.69	28205	5038.62	60510.4	15913.8	33512.8	102731	60701	57058	64208.4	82903.3	8049.68	15717.2	6743.17	21606	6066.32	83192.1	4189.05	13635.5	17165	21872.4	51277.5	19463.9	13896.2	27047.7	6075.58	6239.45	5935.76	68337.8	0	138786	32160.7	55803.7	56471.1	0	9143.12
22	ATP	C00002	Nucleotides	505.989	0.231	[M-H]-	3.85167e+06	4.03456e+06	3002194	3.56408e+06	3706202	4.44607e+06	4.12562e+06	5.62776e+06	2.78639e+06	3.41792e+06	5.79952e+06	4.38795e+06	3.97971e+06	2.79231e+06	3.58433e+06	3927744	2.38566e+06	2.62194e+06	5.07466e+06	6488484	6.26927e+06	4.45695e+06	6.32968e+06	3111275	3477163	3.84875e+06	3.84169e+06	3.91626e+06	3.6899e+06	2706105	5.26933e+06	2736869	5.91561e+06	5.52492e+06	6.85538e+06	5.05638e+06	3.13865e+06	2.13316e+06	4.16909e+06	2.71947e+06	4.6316e+06	4.25641e+06	5.41031e+06
23	ADP	C00008	Nucleotides	426.02	0.232	[M-H]-	2.17548e+06	2.69012e+06	1.66947e+06	1.78243e+06	1.93066e+06	2.39898e+06	2445281	2.50398e+06	1.47078e+06	2.08509e+06	2.54084e+06	2052404	3881165	2.45652e+06	3.979e+06	3.42019e+06	2.24326e+06	2.08291e+06	2547153	3.39036e+06	2.62481e+06	3.22661e+06	3.47103e+06	2.33465e+06	2.34252e+06	2.38502e+06	2.34814e+06	2957182	1972767	1.82745e+06	3.13646e+06	1.73607e+06	2.32965e+06	2747457	2948776	2.30475e+06	3.25563e+06	3478184	3009993	2487203	3530802	3.59691e+06	3.79393e+06
24	AMP	C00020	Nucleotides	346.058	0.239	[M-H]-	1.08884e+06	747001	584615	533887	671924	756430	1147773	421532	497961	423532	304994	370832	3.78331e+06	2116137	2.79992e+06	2411943	1396529	1.35823e+06	749751	865968	669366	868016	811561	476752	843754	1.01018e+06	963212	2.34307e+06	880795	714381	584964	311753	327159	357067	395752	309581	1.32339e+06	2.38271e+06	813609	971633	1.03301e+06	567550	876075
25	Adenosine	C00212	Nucleotides	266.089	0.313	[M-H]-	1.0237e+06	1.01351e+06	757885	854080	929983	1049624	56067.5	28838.5	44562.2	76322.3	47268.6	75147.1	281017	416636	352852	365582	524591	516608	79574.3	98759.5	82400.7	87014.5	92187.5	195515	752575	712740	643235	729939	1.06223e+06	1.11483e+06	236482	200832	158947	234836	263196	194435	483714	441662	469888	374493	429045	113369	142756
26	Adenine	C00147	Nucleotides	136.062	0.22	[M+H]+	2.48132e+06	1.65575e+06	1972701	1562316	1.77715e+06	1.1704e+06	483947	347909	328568	345268	344098	347055	918874	583224	701568	599405	644448	797939	642131	756863	714438	779903	698966	1.08572e+06	434387	1.19513e+06	898526	1.31046e+06	3.47077e+06	2095943	416637	308438	302151	406372	380548	431103	1.40751e+06	645488	1128130	451966	510734	900029	740824
27	GTP	C00044	Nucleotides	521.983	0.225	[M-H]-	4794.41	38110.3	18845.8	2851.3	20228.7	0	0	15473.2	0	5966.95	29852.7	11522.7	4004.81	1004.75	11995.2	0	0	0	4018.67	3952.27	31364.1	0	7237.41	0	0	0	23453.4	4470.64	4880.94	0	0	1607.3	6285.69	8345.29	26577.3	0	0	0	10159.6	0	3748.53	12206.6	0
28	GDP	C00035	Nucleotides	442.016	0.233	[M-H]-	27410.2	12035.7	28231	31686.8	12519.8	0	17839	23190.4	7801.92	2016.75	17692.8	19033	22778.2	2669.77	18873.2	16089.8	0	2535.22	12075.8	19703.6	17970.2	31313.3	31094.1	11988.3	16211.6	6888.83	50465.7	8667.22	21415.7	2589.38	32998.9	8570.52	10218.3	18885.1	29457.9	21880	24303.7	1639.88	28496.7	10025.1	12397.6	13020.9	28476.4
29	GMP	C00144	Nucleotides	362.05	0.236	[M-H]-	28197.8	35287	45944.6	31543.6	20331.6	52012.5	0	0	0	6080.39	0	6410.17	100917	118596	82445.7	50491.3	46221.1	41892.4	61767.2	73805	67590.8	89520.9	78609	38478.5	12052.3	74273.4	72376.8	81490.1	61896.5	40923.4	0	3793.73	0	19338.2	2379.5	0	277018	174455	234569	153038	283561	167075	250167
30	Guanosine	C00387	Nucleotides	282.083	0.333	[M-H]-	227961	257445	212833	250096	269339	219102	108967	50827.3	99758.3	70376.5	84252	90699.9	149962	125460	139919	108025	222076	164114	94799.6	119380	123892	124938	136240	114055	513879	542092	475276	511622	678983	697506	572181	667527	681269	736778	858845	625664	618085	604170	685126	592287	607132	645962	723246
31	Guanine	C00242	Nucleotides	152.056	0.308	[M+H]+	3.67154e+06	3.64324e+06	3616661	3517421	3.42519e+06	3.0795e+06	915281	863393	1107523	748914	952919	746703	2.38468e+06	2.15294e+06	1.95486e+06	1.87733e+06	2431065	2.3757e+06	1.21505e+06	1.2129e+06	1.59809e+06	1.24108e+06	1.65347e+06	1.21888e+06	8.11617e+06	10569460	9356100	10698012	10279576	10920955	6384530	7581122	6.2604e+06	7.30043e+06	6.95639e+06	7.67943e+06	8840397	11666191	13025273	11943296	9659317	7869912	6326434
32	CTP	C00063	Nucleotides	481.981	0.195	[M-H]-	129602	128428	102784	79189.2	108433	133193	43431.5	54216.9	14923.8	27431.7	42018.1	30814.6	85754.5	27075.9	67877.3	46004.1	31468.9	35608.3	47593.5	45810.4	47501.8	16053.2	55335.9	12521.2	56542.1	59897.4	82146.5	113925	115580	72217.3	17084	19921.5	35706.1	36202.7	51041.1	48087	35597.6	16308.3	61673.3	36774.8	80938.9	18303.3	21651.1
33	CDP	C00112	Nucleotides	402.012	0.243	[M-H]-	40936.3	82908.7	41812	26655.6	38304.2	24000.1	19816.2	8143.59	25122.5	34598.5	39516.9	29189.9	26166.4	5700.8	37932.1	25087.9	44811.6	20535	26820.7	77241.3	34848.5	66401.2	91463.2	0	46149.2	49672.1	50646.2	130288	60252	77709.1	95283.4	78429	100053	52862.6	42491.2	42040.3	17324.8	24341.5	27135	22838	27391.8	39778.5	74652.5
34	CMP	C00055	Nucleotides	322.046	0.233	[M-H]-	87492.3	75563.7	87088.1	30752.1	55018.9	44025.8	0	0	0	5665.96	11246.7	0	99117.7	23852.6	41371	77002.3	56398.1	80267.4	41322.3	56511.9	42407.5	106982	51129.5	20323.1	53324.8	97317.6	53330.9	58723.2	69992.6	93602.7	0	6025.38	7161.97	0	0	0	157156	127471	119708	108384	156983	73268.7	108938
35	Cytidine	C00475	Nucleotides	242.079	0.256	[M-H]-	5.27413e+06	5935654	4.41749e+06	5028224	4926868	5.41018e+06	4.44763e+06	3.64488e+06	3579966	3890985	2983538	3.59175e+06	3.78834e+06	2.56187e+06	4.0663e+06	3970799	4.1391e+06	4.33871e+06	3.67383e+06	3.93817e+06	3134522	3811348	4.74826e+06	3.50281e+06	8494855	6615086	8549232	6.48731e+06	6.64961e+06	7.47604e+06	5.34752e+06	3468592	4.26286e+06	5098439	5559590	3.38178e+06	6.95456e+06	4.83225e+06	7.16162e+06	4.29427e+06	6948872	7.43887e+06	7213430
36	Cytosine	C00380	Nucleotides	112.051	0.181	[M+H]+	1.46919e+06	1.2744e+06	1.13711e+06	1423599	1.35285e+06	1.10297e+06	171649	156672	80764.3	168506	238338	188309	995458	665754	907029	634783	842193	1.02008e+06	392098	426704	425225	345632	451835	372047	1.79577e+06	1.47031e+06	1678508	1.59439e+06	1959362	1.54067e+06	532471	295278	437056	419712	454870	401054	827312	1.01573e+06	982297	708470	733812	499836	1.42956e+06
37	Thymidine	C00214	Nucleotides	241.082	0.252	[M-H]-	34941.3	18357.5	37064.9	53486.7	37588	37590.2	28812.9	1084.06	41410.3	23898	13480.9	25377.5	33747.4	55735	63569.3	27878.7	28506.4	17542.2	36686.1	2006.89	22386	23694.5	34517.3	0	24431.9	17436.4	13677.3	24372.1	15689.2	40786.2	20539.8	22743.5	0	34833.9	23235.7	12840.2	27203.5	48894.9	90032.3	15304.1	31492.5	33671.6	24831.5
38	Thymine	C00178	Nucleotides	127.05	0.179	[M+H]+	108371	52520.3	120167	50969.5	43179.4	61914.7	156303	67350.6	139394	41349.4	85229.9	132302	108876	109777	156292	70463.3	39423.7	73930.8	69468.6	142577	62881	105356	162528	81029	147775	204669	187692	121086	109491	151123	132913	426798	62407.8	99427.8	178018	165520	407246	319897	404001	327410	337358	684616	1.56982e+06
39	dTMP	C00364	Nucleotides	321.048	0.265	[M-H]-	0	0	26524.8	0	23341.9	87530.9	0	0	18073.2	0	0	0	0	0	0	0	0	0	0	0	0	0	26017	0	35266.3	29591.7	24288	0	25718.3	0	0	2945.34	0	0	0	0	22315.1	0	37832.3	5776.68	6119.81	0	0
40	UTP	C00075	Nucleotides	482.964	0.23	[M-H]-	420253	405771	423058	295660	384845	471254	176591	220056	103967	113960	268913	175088	263438	164183	214793	177382	143212	175983	198689	298841	268960	136399	263275	82139.5	261470	263310	267204	303933	404725	310848	153474	119125	186889	212965	236669	192338	132525	125889	134084	118267	194592	107734	167839
41	UDP	C00015	Nucleotides	402.997	0.233	[M-H]-	233634	253408	242381	211870	203112	234436	299666	286442	229963	151896	292309	209321	231837	108546	256211	189375	98639	141416	325487	361890	312086	296473	383808	220907	174014	152829	165260	208762	198087	166875	299955	204196	248296	297480	357088	286264	110714	198273	142007	41218.4	160908	279632	252843
42	UMP	C00105	Nucleotides	323.03	0.234	[M-H]-	483262	394155	368497	348764	345561	336185	139108	126086	86572.7	94025.9	87948.4	100154	479678	307914	394736	276802	325796	324287	240465	232635	219196	288220	277115	179805	342128	435128	361360	451724	251251	425296	149890	107523	100996	106887	111844	104415	522232	632815	492205	329263	673161	343238	314459
43	Uracil	C00106	Nucleotides	113.035	0.267	[M+H]+	213051	193724	193010	160925	195259	174147	72483.3	31931.3	46611.8	48096.2	29174.7	71204.1	312294	139926	171349	158345	167578	265064	131522	114547	96540.7	95015.2	151365	102936	51523.9	182412	187117	116496	168614	169942	73704.9	71580	25363.7	41083.7	51849.7	45174	254919	315321	247625	132046	222076	243896	238260
44	Uridine	C00299	Nucleotides	243.062	0.254	[M-H]-	1.1418e+06	1.16299e+06	913838	1.04123e+06	851758	893642	156161	109206	131480	121750	113045	130184	1.72651e+06	1.06896e+06	1.16223e+06	783444	1.53267e+06	1.65953e+06	507667	559030	595050	443922	630592	339534	669195	837793	724578	709974	1144829	1237010	260774	172179	158446	281004	200624	163071	982487	2.15626e+06	904633	669852	746716	550456	488081
45	ITP	C00081	Nucleotides	506.969	0.226	[M-H]-	14560.5	27087.1	8395.55	20800.2	10003	16465.7	12861.8	1143.72	4590.68	3701.09	3043.69	0	32045.8	13445.8	25355.3	11111.3	14294.5	31901.5	7749.14	11071	3161.14	8986.04	0	4402.48	5808.77	20606.3	4157.98	3956.25	20294.6	21975.4	2096.16	8578.2	8035.57	3885.71	8443.49	11258.7	14888.9	25284	20552.5	7234.41	22960.8	8201.4	2591.09
46	IMP	C00130	Nucleotides	347.042	0.235	[M-H]-	306413	251161	190854	226058	221503	303454	123526	81270.4	98574.6	89129.8	77439.1	95823.1	233649	255219	319825	285942	359625	318741	116808	145296	173561	164817	189365	157552	187986	212302	190820	198645	233166	282869	100308	148573	103976	129122	151252	118333	440339	172845	115776	99381.3	98520.6	103649	182862
47	Inosine	C00294	Nucleotides	267.074	0.253	[M-H]-	767315	784821	658218	699200	674538	694961	234703	205962	213262	185287	151907	155451	1.74796e+06	1.37971e+06	1.42885e+06	463491	2.09163e+06	2.17634e+06	373025	359584	366057	295668	477470	292466	669988	709021	703451	510160	902643	910325	648855	523237	561017	571554	807515	468716	2.1868e+06	1.35623e+06	983905	1.16531e+06	913054	787176	603352
48	Hypoxanthine	C00262	Nucleotides	137.046	0.3	[M+H]+	7271888	7.04976e+06	6.61385e+06	6.24058e+06	6.03103e+06	5781436	1.34818e+06	1286397	1.47586e+06	1.04084e+06	1.22498e+06	1.23646e+06	5001490	4.77495e+06	5.8543e+06	3.66813e+06	5.554e+06	5.412e+06	2.18674e+06	2.0041e+06	3.04381e+06	1.79079e+06	2.54179e+06	2.04753e+06	4223914	5.94933e+06	6.27552e+06	6.28146e+06	7593756	6.96402e+06	3.51664e+06	4362183	3576254	4.61424e+06	4.07146e+06	4.19089e+06	11746939	5.39693e+06	6.0049e+06	5.05014e+06	4.22512e+06	4.96922e+06	3.99458e+06
49	XMP	C00655	Nucleotides	363.034	0.232	[M-H]-	12344.9	9198.6	15787.6	21727.5	11472.9	21358.8	0	4480.24	4864.46	0	0	6839.79	27086.9	27621.4	27195.4	16199.5	24632.2	35640.3	9507.32	0	8620.64	2026.65	9461.13	8751.92	14287.9	16839.2	0	8828.63	16710.8	7457.68	8635.78	12598.2	12818.9	3998.37	0	7590.91	15255.2	25774.5	7827.65	22719.3	37374.6	8144.31	17977.1
50	Xanthosine	C01762	Nucleotides	285.084	0.331	[M+H]+	71325.7	65612.3	34786.7	54610.5	54581.5	63938.6	0	0	0	0	0	0	18596.7	0	19227.4	19095.7	13155.5	19952.3	0	0	0	7415.68	0	0	38223.2	61874.8	70135	45090.3	78305.9	70007.3	8150.48	0	5944.01	0	0	7033.32	13355	16422.7	30852.2	32072.4	40446.8	0	8053.01
51	Xanthine	C00385	Nucleotides	151.024	0.258	[M-H]-	2330903	2.5133e+06	1.68972e+06	2.18508e+06	2.01414e+06	2.24617e+06	240915	156258	299311	216940	200810	210463	778172	660086	933873	503376	1.09707e+06	1.07266e+06	299415	312224	391872	334272	307126	262289	2.60644e+06	2.73866e+06	3568868	2726961	4177071	3.97111e+06	457636	649729	487121	631128	663687	701646	1.17616e+06	749903	840406	799459	952388	622450	1.27537e+06
52	Urate	C00366	Nucleotides	167.021	0.244	[M-H]-	21543078	21926358	17758130	22292216	23077018	23971686	27965798	23279480	27579822	20736528	24039930	25683792	22825530	19436134	22465160	14983305	21422496	22531842	24510352	28339458	25725430	30736832	39575632	25673246	29681920	24482048	28002906	30107366	24100138	25500998	36875716	35529820	32046550	39899284	38951892	34783460	22860832	21264282	21977728	18704988	26122248	38672368	34178740
53	5-Hydroxyisourate	C11821	Nucleotides	183.016	0.265	[M-H]-	311532	356151	293159	337160	381147	381485	246413	219376	264107	208518	177036	242887	350874	205573	263795	343331	349360	300486	246660	239375	185352	221919	224509	195480	255892	348472	307422	299797	275162	324221	156567	159063	173849	157147	212146	139187	250277	141828	220194	176441	221428	94739.2	83769.5
54	(S)(+)-Allantoin	C02350	Nucleotides	157.037	0.251	[M-H]-	545576	383624	320807	287645	267174	303139	103123	34288.5	104511	13897.8	30386.1	101616	729465	674300	872967	720370	672737	944112	438601	413942	395884	393440	514882	616952	1.48279e+06	628503	408201	705494	436993	371172	248870	108267	53855.1	217255	94155.4	78088	341952	247293	329978	373276	377240	639511	934368
55	Allantoate	C00499	Nucleotides	177.061	0.183	[M+H]+	154598	64742.3	172556	146468	124158	162944	0	0	0	0	0	0	0	45554.3	13422.8	0	0	0	0	0	0	0	0	0	101051	133384	47965.8	111987	175748	87220.3	0	0	0	0	0	0	0	32558.3	12773.2	8789.13	0	0	0
56	Cyclic AMP	C00575	Nucleotides	330.061	0.206	[M+H]+	185628	219624	281605	224763	375009	294983	137447	140006	165674	161527	62559.9	187178	346236	77012.9	197299	230085	257648	102296	81606.4	269362	98379.8	196378	156739	172578	237407	260292	266259	176699	248468	164589	66652.2	242491	97176.3	126622	154377	77332.8	153292	193442	122743	148400	97309.8	74558.6	180485
57	Cyclic GMP	C00942	Nucleotides	344.041	0.273	[M-H]-	1912.59	2751.97	2701.96	43073	44475.7	9410.81	2147.57	1954.12	0	7725.94	5836.71	2232.95	27352.5	58426.6	76681.2	9240.99	25530.9	84231.3	40423.8	31635.2	36154.4	67619.4	28811.4	30045.8	18463.2	3564.44	4294.16	3285.74	2316.01	2550.62	1649.28	0	2474.02	0	2740.25	0	287644	161010	145148	68368.2	271270	147697	93847
58	Cyclic CMP	C02354	Nucleotides	306.049	0.374	[M+H]+	42337.3	0	0	13573.5	7289.97	0	75869.9	52733.9	73336.6	34729.2	102384	80004	8560.82	88004.8	44083.4	12015.8	20987.5	29567	83178.3	45920.4	77481.1	63489	37589	52281.5	12934.5	11717.4	0	17935.5	16833.1	9753.77	29758.4	80764.3	50162.3	33991	34337.4	55097.5	18052.3	29791.7	17776.5	18147.5	19216	33811.2	13726.9
59	5'-Phosphoribosyl-N-formylglycinamide	C04376	Nucleotides	313.044	0.666	[M-H]-	177108	396883	277671	147852	499792	0	428023	0	463328	166923	111238	303411	352251	0	0	417615	241682	510067	0	0	4461.11	13643.5	6329.5	0	647860	196749	0	0	316484	0	0	0	140604	163643	0	101153	478669	298477	0	423792	137890	0	69338.7
60	5-6-Dihydrothymine	C00906	Nucleotides	127.05	0.251	[M-H]-	7.99223e+06	8816510	6.76972e+06	8799193	8511280	9212993	4.12937e+06	3.57028e+06	4563950	3696092	3.56064e+06	3.82213e+06	9494217	6857528	9251263	6.97166e+06	9387740	10007776	4.60363e+06	4.73964e+06	4623942	4.78579e+06	5936334	4.31363e+06	7.71894e+06	6.37405e+06	5759508	5428838	7.81188e+06	7.60458e+06	4255374	3.7651e+06	3.46271e+06	4.38058e+06	3.53506e+06	3.58253e+06	7.91671e+06	6.35162e+06	7658512	6.57485e+06	7153940	3682928	3.84383e+06
61	Pyridoxal	C00250	Nucleotides	166.049	0.256	[M-H]-	30136.1	103862	33290.3	73153	85605.5	87692	15915.5	32612.1	19913.6	32449.9	48087.1	27949.3	21150.9	80608.9	83108.8	51166.1	51745.8	51330.6	49266.4	71950.1	8059.49	56795.2	100626	57879.2	64407	66693.2	49945.9	56844.1	73754.8	75846.9	80114.9	32370.6	24534	75930.8	55267	27934.9	63210.2	71782.2	20476.1	33303	60953.4	53996.8	101759
62	4-Pyridoxate	C00847	Nucleotides	182.046	0.25	[M-H]-	1.53953e+06	1.82331e+06	1.61622e+06	1.05109e+06	1.50689e+06	1726120	973054	1.17192e+06	845432	969641	1.12569e+06	1.2145e+06	1.18853e+06	788340	1.10993e+06	1012405	847031	1.02078e+06	1.28229e+06	1.4701e+06	889783	1.2208e+06	1.14374e+06	1.00139e+06	1844083	1.78281e+06	1.74537e+06	1.72438e+06	1621992	1.69849e+06	911998	800942	924303	837920	1.11564e+06	813872	889391	978887	948321	826046	993504	1.0109e+06	1.17492e+06
63	Pyridoxamine 5'-phosphate	C00647	Nucleotides	247.046	0.261	[M-H]-	2250.77	0	1308.33	0	0	0	0	8003.07	2852.62	0	1358.47	1598.22	25714.1	10194.9	0	3909.5	51228.8	19824.5	0	0	0	0	0	1630.06	2841.43	0	17642.9	3699.51	33880.8	63845.1	25018.8	1776.96	0	0	23210.5	9196.67	0	0	37959.8	0	2947.21	0	23682.7
64	Nicotinamide	C00153	Nucleotides	123.055	0.245	[M+H]+	5448948	5.47578e+06	5554171	5.67064e+06	5.06943e+06	5608872	4528404	4.81733e+06	4920000	4.28932e+06	4.63099e+06	4.6335e+06	5.30388e+06	5.11615e+06	5.52163e+06	4.86693e+06	4.92688e+06	4.9951e+06	6.23947e+06	5.95522e+06	6.14029e+06	5231058	5.80357e+06	5.57099e+06	5.23858e+06	4.71329e+06	6.05191e+06	5.89524e+06	5.41379e+06	5.73517e+06	4.32029e+06	4.55147e+06	4.76892e+06	5.48463e+06	5.45162e+06	5701096	5208863	4.79894e+06	5013610	4.89058e+06	4.86241e+06	4940806	4388406
65	Nicotinic acid	C00253	Nucleotides	122.023	0.303	[M-H]-	250249	290561	276670	290218	264869	278673	70789.6	59182.2	69397.9	30874.7	49834	80343.4	31243.1	60524.8	63938.4	64679.5	77516.5	119512	58494.8	67786.3	73840.4	78172.5	64361.2	67720.2	169653	250478	259077	246864	183297	200653	67226.4	61798.1	75419.1	73936.5	107687	64797.7	163654	114046	67109	73487	127589	64205	300855
66	Adenylosuccinic acid	C03794	Nucleotides	462.065	0.227	[M-H]-	3434.8	9771.6	7739.46	0	0	2823.38	0	0	0	2721.23	4280.83	0	20983.9	1499.88	11727.6	9453.25	0	3041.66	4500.13	0	2073.67	41074	0	1606.42	5689.41	9074.73	7893.45	5754.76	6671.03	2743.6	25667.9	28282.1	24754.5	0	11152.3	13503.9	6862	6677.01	5997.25	0	10766.5	2590.95	1420.8
67	UDP-glucose	C00029	Nucleotides	565.051	0.231	[M-H]-	6.28925e+06	5165048	4.01079e+06	5.34618e+06	5.14105e+06	5.85607e+06	2428883	2.09969e+06	1.91436e+06	1697638	2.19523e+06	2.2949e+06	3.71042e+06	2.52413e+06	3272522	2.65526e+06	3.62783e+06	2.77218e+06	2.21722e+06	2.45819e+06	2.3266e+06	2.43115e+06	3445070	1.83796e+06	3.28583e+06	4.27626e+06	3.63924e+06	3.03223e+06	4.03674e+06	5148358	1.88862e+06	2.27979e+06	2.52613e+06	2.46445e+06	3076389	2.48445e+06	2712088	2.13182e+06	2312323	2274947	2.64072e+06	1.5544e+06	1562384
68	Flavin mononucleotide	C00061	Nucleotides	457.111	0.586	[M+H]+	7983.13	41459.1	19391.6	46677.4	65837.1	68895.2	46619.8	45550.9	45064.1	34626.6	40075.4	70997.8	17974.9	10721.3	11964.3	22993.9	30898.8	51849.4	37905.3	45616.3	39542.7	38053.3	77326.9	43734	58148.1	40916.2	67902.8	43391.4	27052.3	63958.6	47237.7	9195.39	21386	40251.1	60658.9	28815.5	47634.7	11154	43175.1	36229.4	56189.6	41782.8	42959.1
69	FAD	C00016	Nucleotides	784.154	0.529	[M-H]-	161403	113786	92384.7	148858	127112	118575	81241.7	68516.7	71738.3	54725.4	79530.5	68652.1	136362	72919.5	103497	71176.6	99961.9	73319	71843.2	105588	86748.8	91337.3	153338	57116	115651	124737	133314	90882.7	129113	112398	72058.5	78280	82895.8	79153.1	93574.4	77224.7	75629.3	68035	75381.8	93701.8	80367.1	50950.8	45249
70	NADPH	C00005	Nucleotides	744.087	0.229	[M-H]-	167964	139794	126232	158788	129772	192324	114212	101655	66851	49197.3	113538	103802	148809	90613.6	144624	103236	69172.8	99631.2	104222	115594	119268	88033.6	190066	69451.4	153385	139394	144094	85138	163680	111029	85953.1	75769.1	103378	88966.8	87035.4	113909	68533.2	65888.7	92422.9	83583.7	120952	47965.1	61809.9
71	NADP+	C00006	Nucleotides	742.065	0.228	[M-H]-	22554	36716.3	30601.2	30767.8	36856.4	34539.6	50560.7	28547.4	20093.4	16513	49436.4	16751.5	39142.6	44805.9	32258.4	34361.5	27554.5	34311.2	35062.8	65936.1	63814.4	33304.2	51538.1	33412.6	83356.9	79148.3	61194.2	84403.4	36730.3	40552.2	67100.9	24352.6	95028.7	72337.3	89903.2	76571.6	63424.2	61491.7	30099	20258.8	36227.2	25876.8	78959.3
72	NAD+	C00003	Nucleotides	662.101	0.244	[M-H]-	1.7505e+06	1.73837e+06	1.00467e+06	1.57751e+06	1.06387e+06	1.77735e+06	1.1574e+06	1.34214e+06	1.2557e+06	1.4142e+06	1.45876e+06	1.10128e+06	1.60724e+06	1728999	1.60456e+06	1370109	1.2103e+06	1475629	1.87326e+06	1.79581e+06	1603834	1.36595e+06	1935360	1.62298e+06	1.50452e+06	1487865	1.69675e+06	1.72147e+06	1.35118e+06	1.28939e+06	1.59239e+06	1.42837e+06	1.42412e+06	1.68513e+06	1.60489e+06	1.32893e+06	1.03787e+06	1.01404e+06	1.38571e+06	1325478	1.6332e+06	1338668	1.4836e+06
73	NADH	C00004	Nucleotides	664.115	0.253	[M-H]-	198328	193230	86583.2	82081.8	79894.2	86530.3	30362.2	134325	98627.3	97352.6	137637	86256.5	235886	70133.5	198559	88278.4	89566.8	91120	174029	192952	191690	199043	208728	124047	126952	104847	131487	159536	165646	74782	163007	130710	80614.7	194303	42149.3	83363	62746.1	32223.4	99412.2	104358	56530.7	70242.8	91584.2
74	Phosphate	C00009	Phosphates	98.9844	0.219	[M+H]+	2.1351e+06	2.02e+06	1987196	1.90901e+06	2121507	2.20599e+06	2124286	1.90105e+06	1.76339e+06	1.98147e+06	1.4866e+06	1961398	2.41892e+06	2.22179e+06	2.78775e+06	2.36755e+06	2.40651e+06	2.21641e+06	1947653	2.36404e+06	1853793	2105515	2.39586e+06	2.1979e+06	2.34381e+06	2.04369e+06	2171654	2345480	1970231	1.89634e+06	2.29016e+06	1.78916e+06	1.76176e+06	1.97078e+06	2.54776e+06	1.66548e+06	2.83397e+06	2.58591e+06	2.23651e+06	2.19403e+06	2.3119e+06	2.46159e+06	2.66736e+06
75	Diphosphate	C00013	Phosphates	176.936	0.232	[M-H]-	580086	481151	411234	581587	532740	551537	171742	161223	200763	117223	156799	156126	704966	332396	620664	311701	569763	556099	233322	238430	213689	185065	450189	151981	808313	814013	759952	719264	479532	631891	303384	235681	253055	292768	221718	236864	690720	563193	442004	392507	430781	280989	323366
76	Glucose	C00031	Glycolysis	179.055	0.252	[M-H]-	5.14566e+06	4586708	4.66227e+06	5.02735e+06	4.66074e+06	4874786	2.51687e+06	2.27473e+06	2.62822e+06	1.94769e+06	1.92633e+06	2.53492e+06	17774438	13844533	14341409	7339746	22017142	21596168	8440177	8596678	10146869	9692259	10479581	6.2397e+06	12880183	10709709	8769163	7.75677e+06	6.79381e+06	6.79461e+06	5.86688e+06	4910386	4664609	5.13409e+06	5338708	4427554	20364064	19624372	22247294	17230142	19991102	18404584	21022218
77	Hexose-phosphate	C02965	Glycolysis	259.021	0.23	[M-H]-	10898000	10333777	9477151	11711573	11832895	13099593	5746236	4957964	5769278	4.62237e+06	4.66164e+06	5369838	16599269	13293936	15036540	12847575	17435706	17948978	7.23349e+06	7763392	7.52228e+06	7569766	9344793	6081748	14246719	16030964	11184877	11663531	15679735	16470204	6.85751e+06	7523344	6.19717e+06	6.86257e+06	7.31196e+06	6.21202e+06	21273396	20653162	20640240	18417974	20060362	11349085	11086959
78	Fructose 1-6-bisphosphate	C00354	Glycolysis	338.988	0.226	[M-H]-	322673	415936	385457	356963	354094	424188	976865	902635	738152	504864	663221	728415	1.09278e+06	990778	1.00278e+06	1454218	1033823	1.36688e+06	1.22181e+06	1577149	1.4222e+06	1.1709e+06	1.61053e+06	808569	662915	670864	493540	600980	487116	629420	1.03235e+06	725858	856141	923009	928965	820210	1691381	1.22092e+06	966008	813662	1050135	872540	800716
79	Glyceraldehyde 3-phosphate/Glycerone phosphate	C00118	Glycolysis	168.99	0.236	[M-H]-	475600	364308	407429	506923	479979	571786	225861	217795	275570	208172	243388	235179	715200	503924	710150	624698	726968	744787	399652	401396	329823	383467	509611	397192	493350	489592	440251	448148	547486	641742	262487	326491	279092	342914	323352	359387	745152	751218	820672	714846	781924	424666	445081
80	2/3-Phospho-glycerate	C00631	Glycolysis	184.984	0.23	[M-H]-	3.88126e+06	5038147	3.84495e+06	4.3594e+06	4.50801e+06	4.90289e+06	1.99902e+06	1.98516e+06	1.88059e+06	1.49002e+06	1.93472e+06	1527814	4.20772e+06	3670316	3.85528e+06	3.10039e+06	3.71243e+06	3.94808e+06	3.5921e+06	3.40046e+06	3205596	2.6254e+06	4.45835e+06	2.46841e+06	3.48115e+06	4.26732e+06	2.87895e+06	3388032	4.26284e+06	4.28771e+06	2951512	2.27132e+06	2.58931e+06	2.55434e+06	3113781	2.42583e+06	4.59331e+06	3221928	4.95443e+06	3.61384e+06	3.94042e+06	4.20582e+06	4.64661e+06
81	Phosphoenolpyruvate	C00074	Glycolysis	166.975	0.229	[M-H]-	818424	1.05984e+06	871936	778817	856469	981266	361865	339338	309091	218025	369061	311277	857042	598187	797477	542836	678528	829593	710744	580396	499123	454177	730901	428068	659719	755512	546468	548562	709165	756945	513898	417946	500379	413357	648600	427942	769430	410391	1133234	571908	888681	964218	1.01695e+06
82	Pyruvate	C00022	Glycolysis	87.0076	0.263	[M-H]-	4173987	4.37663e+06	4.3768e+06	4.29396e+06	4983734	4.61072e+06	2.33377e+06	2.16316e+06	2.47257e+06	1.73655e+06	1858056	2.32143e+06	6.34541e+06	5611702	6006110	3.32804e+06	7391914	7.58619e+06	3.33124e+06	4.06833e+06	4.11968e+06	3.53741e+06	5321526	2.74723e+06	3.96101e+06	3281064	3.31606e+06	3.1712e+06	4.2294e+06	4.28791e+06	2.69911e+06	2060878	2.21931e+06	3.33334e+06	3076432	2700678	5621770	6241276	4049618	4.89379e+06	5.03584e+06	5.37447e+06	4.55659e+06
83	Lactate	C01432	Glycolysis	89.0232	0.26	[M-H]-	16925938	14694275	13271936	12153781	12576661	10174232	977383	915232	703507	610744	982663	1015871	10569692	7695892	6.97575e+06	4411222	11521019	11861836	4.1282e+06	3931984	5.84327e+06	5.20129e+06	4.76654e+06	4065186	12715624	20096988	20156566	18943202	27314448	28275198	5.26922e+06	2.24291e+06	4101681	2.39263e+06	3.02275e+06	2.6501e+06	9636607	11324133	8892708	6.88289e+06	7062292	7.85035e+06	8463163
84	Maltose/Sucrose	C00208	Other sugars	341.109	0.246	[M-H]-	33374090	25283342	24156416	30053026	25711312	31264174	20845534	18421978	21285006	17318584	16491989	17341896	34851456	23311158	32668794	25656752	33224446	29051626	24790462	23982246	18385370	25138776	19673570	21820824	16806854	14662795	10284907	10420039	18600130	19661486	15637165	13655105	12417741	16159971	16930446	12725419	48827116	38862644	29768954	28298480	44507032	15000964	13353713
85	Maltotriose	C01835	Other sugars	503.159	0.245	[M-H]-	648043	474976	603482	610331	482822	479799	149674	118131	99835	132616	156772	93057.8	1.56439e+06	1.05443e+06	1.29798e+06	632967	2.06694e+06	1218287	785473	1.0057e+06	1.25678e+06	872019	1.26108e+06	936766	446008	547119	414100	316476	445938	545120	358472	220185	284006	244956	260521	133515	3.20034e+06	1.76795e+06	2542801	2031060	3.10937e+06	1.04534e+06	1.42145e+06
86	Mannitol/Sorbitol/Glucitol/Iditol	C00392	Other sugars	181.07	0.261	[M-H]-	33342022	31604930	34139352	36931652	41123220	37380412	1.2783e+06	1.51682e+06	989975	1.1897e+06	787498	1.04292e+06	2171977	1.8638e+06	1.95769e+06	929894	3.05338e+06	3.05445e+06	786291	902156	915604	905501	1.14151e+06	728526	4.82191e+06	5.7152e+06	4.68464e+06	4.78981e+06	17912608	18742542	642287	466407	485578	654547	566518	584799	2.12175e+06	2.3869e+06	1.76584e+06	2.54045e+06	2.0228e+06	821299	708777
87	Ribose/Ribulose/Arabinose/Xylose/Xylulose	C00121	Other sugars	149.045	0.25	[M-H]-	430814	462247	394551	354211	404027	399996	58936.9	113541	117175	66961.9	96393.7	74200.4	1.0623e+06	831795	937026	565580	1.1756e+06	1.21965e+06	514285	372997	556194	401102	519684	394181	1.26718e+06	1.1095e+06	993085	913525	655895	637551	398019	347834	487679	386248	302845	310762	1.75749e+06	1.37373e+06	2.04396e+06	1399230	1699285	1.33328e+06	1.52534e+06
88	Rhamnose	C01684	Other sugars	163.061	0.257	[M-H]-	1.14996e+06	1.08316e+06	1.31692e+06	1209914	1.49399e+06	1486478	59503.3	84787.1	27162.1	44344.4	55306.3	59493.4	319339	183686	254226	158942	280281	274402	120006	129156	166603	88439.8	94104.2	128878	709306	645589	450348	418526	773287	753145	158693	174146	147875	106521	84291.4	88695.4	604341	436375	652666	522278	442602	429969	476359
89	Arabitol/Xylitol/Ribitol	C01904	Other sugars	151.061	0.256	[M-H]-	3.66597e+06	3642165	3.26402e+06	3.87845e+06	4081268	2.8814e+06	168452	185551	252256	437414	105068	204067	411489	177739	243938	188944	420338	424821	111400	125558	93232.2	74463.1	201198	160981	4.45568e+06	7637950	7201676	7269118	8.0536e+06	12626531	991799	595886	885084	607756	705172	446501	1398526	769852	1350304	860711	778607	392202	475653
90	Acetyl-CoA	C00024	TCA cycle	808.125	0.239	[M-H]-	0	0	0	0	0	0	0	0	0	22128.7	0	0	0	0	0	0	0	0	0	0	0	0	0	0	0	0	0	0	0	0	0	0	0	0	0	0	0	0	0	0	0	0	43499.6
91	Citrate	C00158	TCA cycle	191.018	0.242	[M-H]-	133524224	121257656	124203176	145120128	150940496	138128016	81472728	76780408	95444832	75784864	62311500	78661784	95810424	86624168	110496104	86596536	90331416	95704808	72338936	77170168	98300032	87370744	103792696	64173364	134161088	120997240	130910552	134663824	146072688	144491952	91152232	94850536	82459768	128719144	118906808	115012184	121234112	90871384	96270360	125165568	106868344	113634432	98893352
92	2-Oxoglutarate	C00026	TCA cycle	145.014	0.246	[M-H]-	9202764	8989533	8071504	7748270	8430988	8491691	2.16133e+06	1.76306e+06	1.93222e+06	1.70259e+06	1.65802e+06	1.92532e+06	3.2404e+06	2.32918e+06	3015450	2234089	2824197	2.3492e+06	1.87744e+06	1733660	1.59384e+06	1.88894e+06	2.35139e+06	1.31122e+06	3.99412e+06	4.52714e+06	4.89633e+06	4.52306e+06	6.26649e+06	6397884	2539622	2.45695e+06	2.60798e+06	2.44974e+06	2.24739e+06	2409434	3.02148e+06	3.79009e+06	3.09035e+06	3.14604e+06	3.29147e+06	1.70782e+06	1.93275e+06
93	2-Oxoglutaramate	C00940	TCA cycle	144.029	0.263	[M-H]-	38297.8	28349.4	37869.5	39750.7	56134.7	38751.5	12452.1	18291.8	12525	7617.44	8031.75	12702	121550	36696.4	49890	41995.7	96492.1	71426.2	30012.3	23982.5	11718.8	13060	16367	21342.6	136827	76720.4	24447.8	82034.4	84377.8	35691.7	12806.3	11502.1	8987.31	9967.46	36087.1	20707.9	205563	139016	140424	98831.5	122887	76632.8	126442
94	Succinate	C00042	TCA cycle	117.018	0.256	[M-H]-	30799504	32059434	28850288	26259190	27145538	33841300	9082273	7935828	9420111	9074187	8784797	8311030	21383960	20775698	20879274	14545733	24718250	24042398	12751364	13217501	13705461	12910587	19283666	10868663	28182742	29071590	28763104	30844282	21361530	16982416	10799939	14012249	10692649	11233188	12577475	11615144	23164184	29028850	22162286	17984400	22163678	16336541	14556040
95	Fumarate	C00122	TCA cycle	115.003	0.246	[M-H]-	22922096	22376826	21557738	22262402	25641514	25698406	9029823	8961523	8992866	6.76127e+06	7860280	7.81605e+06	25385758	15614171	25278066	15008779	20390850	19250390	13094413	13756173	11583501	13829133	17164458	10541617	14713701	13250859	13691060	13518155	21163330	20869142	8784353	8.1442e+06	8541935	10351489	9714653	9029164	14000672	15997552	13080379	11615847	13662472	8842663	8.15043e+06
96	Malate	C00149	TCA cycle	133.013	0.246	[M-H]-	95797376	104068992	101505024	91432744	111266984	111116320	39422244	42037904	35893996	30264742	37094016	33529696	113874600	85750296	114421432	66560940	83417552	83166328	59581148	59529556	49078144	59038060	77269032	37395468	61761932	59413664	50866612	50881580	91500512	92355720	38179068	36750672	39613864	41528160	37239068	38465344	66896700	80096864	59074004	52779660	62961028	34535616	34521484
97	Oxaloacetate	C00036	TCA cycle	130.998	0.241	[M-H]-	207328	170499	268757	161400	254783	198235	139187	129661	177410	130715	122762	112923	212028	103521	170412	150591	138250	172657	139635	163827	190441	116597	169870	126296	228537	206268	188367	213281	247433	181611	216738	151815	159696	209847	202658	193854	206779	153889	163129	204756	163176	132813	169880
98	2-Hydroxyglutarate	C02630	Alternative Carboxylic acids	147.029	0.247	[M-H]-	4.21689e+06	4.03366e+06	4073262	3208669	4176672	3.80224e+06	1.40145e+06	1.29769e+06	1.14662e+06	1.05936e+06	1.22636e+06	1.02746e+06	4.6846e+06	2.97179e+06	4.15582e+06	2661923	3.52526e+06	3.66677e+06	2.51791e+06	2.52699e+06	2215516	2.61285e+06	2.91247e+06	1.6564e+06	2885750	2.98986e+06	2.64624e+06	2846226	3637766	3.8151e+06	2.01418e+06	1.93593e+06	1.86263e+06	1978536	1.9066e+06	1613601	6827212	5.63295e+06	6745942	4766645	6.43874e+06	6133756	6.17356e+06
99	Itaconate	C00490	Alternative Carboxylic acids	129.018	0.243	[M-H]-	8.24391e+06	7.48026e+06	6535848	8515265	7659250	8690692	3521890	2.61947e+06	4362719	2.87977e+06	2.67194e+06	3.64187e+06	7.31665e+06	3667290	6.60207e+06	5.31044e+06	5.19306e+06	5.66797e+06	3.90469e+06	4.62119e+06	4.01682e+06	4.32193e+06	5447948	3371836	10368173	6.66002e+06	8.31039e+06	8.21757e+06	13093339	11609925	3.88822e+06	4511992	3.77928e+06	5371206	4.94157e+06	4.63895e+06	8941497	6.37858e+06	7.31241e+06	8718835	7866188	5630120	5969912
100	Glucono-1-5-lactone 6-phosphate	C01236	Pentose Phosphate Pathway	257.007	0.23	[M-H]-	0	13574.1	0	5030.9	0	13750.4	6792.11	0	0	0	5096.65	0	17349.5	28233.9	26225.8	18391.7	26385.2	22984	2498.96	15901.1	4779.49	0	5651.69	3502.15	8957.62	0	0	21231.2	15975.7	21022.3	0	5262.74	0	0	6717.87	0	29411	15104.8	16014.7	33473	17605.5	1816.21	16077.3
101	6-Phospho-gluconate	C00345	Pentose Phosphate Pathway	275.016	0.23	[M-H]-	163090	138642	156871	149459	191913	204950	107703	140969	62938	75672.1	111893	113055	231281	295340	306515	267264	302615	315857	250733	275884	267971	225096	266288	128483	32928.8	43543.1	28473.5	25494.3	118485	57484.6	30666.9	18414.6	40510.4	18706.7	2859.61	41787.8	88032.6	62955.7	63121.6	55445.1	82666.8	79026.2	83315.9
102	Erythrose 4-phosphate	C00279	Pentose Phosphate Pathway	199	0.232	[M-H]-	266748	246738	263234	334601	361747	327036	172103	132751	131428	135012	141247	140914	422997	329117	372112	351333	439548	409341	202182	201627	159991	208122	264321	144315	455475	487333	339355	263479	445196	488919	207182	240761	156119	194332	200460	166218	509832	418264	442031	353680	402978	275495	201551
103	Sedoheptulose 7-phosphate	C05382	Pentose Phosphate Pathway	289.032	0.232	[M-H]-	979616	912042	831443	1.14583e+06	1053031	1.19749e+06	303950	268556	280103	231079	258371	296740	1.2819e+06	1.03733e+06	1.23414e+06	1044396	1.25756e+06	1404388	429999	462378	510981	419801	535376	391504	1.24231e+06	1.43409e+06	1266422	1.21032e+06	1.11549e+06	1.36882e+06	328680	319976	315719	254196	283322	307954	1877283	1.67031e+06	1.76091e+06	1.68115e+06	1.68685e+06	639305	726621
104	Pentose phosphates	C00199	Pentose Phosphate Pathway	229.011	0.233	[M-H]-	361623	278828	236528	371380	343092	438909	120127	102207	119242	107769	133812	142460	488996	520510	552240	526023	707067	663598	290196	238248	295622	293336	322786	306496	278993	353492	310875	329265	437658	425212	176411	154171	131483	119761	158482	232142	602207	512561	528152	474277	556620	398382	326859
105	Glutathione	C00051	GSH homeostasis	306.078	0.241	[M-H]-	28985568	27267622	17093578	23865160	24198656	24592214	17125762	16776032	19384550	15937752	16726469	14745841	22160552	12051836	16059752	10283491	18860830	16783554	23200598	24447336	24124982	23417862	28563622	18979582	8.17088e+06	10122624	14385989	13758521	21729102	21397026	14210839	18021136	16014659	19325526	23199336	17552486	12533467	5.2866e+06	11531239	13085936	17995766	22808600	15336199
106	Glutathione disulfide	C00127	GSH homeostasis	613.157	0.273	[M+H]+	5.11265e+06	2.4679e+06	4.06778e+06	3.62036e+06	2.93325e+06	2.97913e+06	3.69685e+06	2.47741e+06	3643512	2.94258e+06	3.33712e+06	3308032	2485472	4477898	3.4653e+06	2.35867e+06	3.58516e+06	4688172	2.7732e+06	2.66655e+06	3.09926e+06	3061224	3.31219e+06	3589958	3.49501e+06	4.10516e+06	3.81653e+06	3.40971e+06	5.9164e+06	4.85201e+06	4.5656e+06	7.04417e+06	5.6325e+06	5552164	4.20087e+06	5387036	4.33791e+06	9912271	6537378	6485786	3372281	2.41383e+06	2.96978e+06
107	5-Oxoproline	C01879	GSH homeostasis	128.034	0.25	[M-H]-	19155314	18281642	17232438	17629672	19306258	19449064	8.11641e+06	6557002	8313700	7.0176e+06	6.8234e+06	7.43397e+06	24286072	15266976	19801646	13652941	22622874	22549206	13582155	13497685	13383979	14057649	14524931	10986510	20807870	21241498	18708242	19336202	20659248	19506838	10995687	9416589	9492933	9960259	9087163	9412233	32526790	32466686	32969430	24897552	31508030	24551368	24781670
108	S-Glutathionyl-L-cysteine	C05526	GSH homeostasis	427.094	0.204	[M+H]+	48559	95793.7	67548.2	101812	36300.8	49762.5	116506	149400	58592.5	37105.6	170270	98051.8	48870.2	57400.3	112191	51141	49285.9	58243.4	154135	67063.3	133423	97647.4	53404.9	91793	66741	33316.3	69333.4	140310	102123	25536.5	110899	97879.6	173033	184115	114181	241701	37449.7	64081	35637.9	27919.3	72258.6	224484	15638.1
109	Cys-Gly	C01419	GSH homeostasis	179.047	0.246	[M+H]+	2.05742e+06	2.2904e+06	1596229	1.74503e+06	1.66127e+06	2.03351e+06	1.31151e+06	1.24432e+06	1.21444e+06	1.03556e+06	1.27745e+06	1.19141e+06	1.65195e+06	858228	1279958	758600	1.5595e+06	1.2891e+06	1.72166e+06	1.75694e+06	1769926	1616932	2.04469e+06	1499874	450966	610640	1.33861e+06	1.15514e+06	1585429	1.75591e+06	1.22526e+06	1305532	1.21483e+06	1373371	1.62243e+06	1509047	640854	421191	789067	1.01624e+06	1.38467e+06	1.51508e+06	1009338
110	Ascorbate	C00072	GSH homeostasis	175.024	0.244	[M-H]-	60088964	47709172	44285668	59412644	62576144	60058844	19150098	18092286	22873482	14796443	14466060	18031590	46205956	41890636	58418196	34656484	58410816	51917460	28755638	26775838	27223338	29693498	37964884	29584822	19512854	24504298	31372134	27345536	46261996	66400208	10908404	22585926	11577135	23933422	18730712	23550898	10419530	20937926	12318163	19401450	16870650	13071539	9660117
111	Dehydroascorbate	C05422	GSH homeostasis	173.008	0.246	[M-H]-	8446878	7.74457e+06	7.10949e+06	8914615	8543331	8406695	4249314	4097510	4560397	3.42877e+06	3.65161e+06	4195820	7.43531e+06	4224584	6.87494e+06	5.79346e+06	5098792	5.41959e+06	5.23681e+06	5.18766e+06	5.0204e+06	5.01573e+06	6.60539e+06	3.67641e+06	10406071	7.26656e+06	9109496	9224821	13630245	12225703	5.03014e+06	5.33181e+06	4.96046e+06	6.37012e+06	5.98277e+06	6084498	9947575	6643172	7.71801e+06	8973501	8.04277e+06	5942680	7.23417e+06
112	gamma-Glutamycysteine	C00669	Gamma-glutamyls	249.056	0.241	[M-H]-	242103	208951	250663	200294	226506	254142	23030.4	21611.1	107991	13119.7	89152	21582.4	312281	178674	196088	143229	192995	129474	118385	112708	61962.7	108808	187354	70801.7	243405	271845	306643	329465	386260	467231	133139	203989	107465	158659	172981	139170	206463	120034	121271	191204	245282	289083	170795
113	gamma-Glutamyl-Se-methylselenocysteine	C05695	Gamma-glutamyls	311.015	0.263	[M-H]-	35387.9	43723.2	24529.5	75846.8	28224.8	7673.94	10409	0	4057.6	0	12748.4	29868.7	0	0	0	0	31223.7	1685.35	20329	0	55298.4	0	17204.2	0	0	60409	75951	2317.23	18659	65018.6	0	25291.4	0	21191.1	0	33849.8	26930.1	0	0	2254.95	0	0	32372.8
114	gamma-Glutamyalanine	C03738	Gamma-glutamyls	217.084	0.243	[M-H]-	394964	270386	252092	337998	312782	274169	61073.3	44409.5	22228.8	0	11711.9	18906.2	422204	295842	340391	219635	321350	326928	184435	161176	216222	207658	169384	135207	345753	397515	353741	235469	268781	310233	105358	45428.1	80635.7	66359.2	110263	68189.4	586866	408159	488378	367434	431841	401314	293539
115	gamma-Glutamygamma-aminobutyrate	C15767	Gamma-glutamyls	231.099	0.245	[M-H]-	223925	191412	173724	177896	130159	196281	0	0	19423.1	1114.79	22441.2	0	253140	165863	221733	226980	252508	289506	66034.2	89989.1	131607	87184.7	141745	87145.7	241728	200618	231331	239078	178051	203467	49980.7	10543	37853	103277	24703	50226.3	297091	334088	426179	277579	390125	289241	263650
116	gamma-Glutamylputrescine	C15699	Gamma-glutamyls	218.149	0.171	[M+H]+	218111	134710	184038	127240	123440	63325.1	13546.8	0	9165.13	9203.08	0	7822.51	356623	478518	323714	206282	377259	299153	332101	192201	430643	370092	246112	347079	156351	95620.9	151350	253777	249131	138452	91250.4	45001.1	19406	38126.7	34736.6	70505.2	745718	896913	899405	872612	968509	827222	726318
117	5-Glutamylglutamine	C05283	Gamma-glutamyls	274.105	0.237	[M-H]-	276106	263083	247716	220248	311799	318593	94694.3	82962.6	188334	42062.6	92216.1	100355	256996	208845	319794	169764	199242	201314	91792.1	106174	116838	99148.8	138283	47272.5	348423	354548	335116	339330	394825	359212	175807	128071	140154	161882	158077	123954	334977	305715	298580	231628	258408	175389	156821
118	5-Glutamytaurine	C05844	Gamma-glutamyls	255.063	0.578	[M+H]+	37424.8	7038.69	31127.8	26366.4	19461.1	21504	11518	7655.24	25108.3	6056.24	5195.93	14326.2	68621.9	32872.2	28966.7	37900.9	34492.5	49949	16901.3	21235.3	15917.3	18044.7	32313	95228.5	360101	558408	207612	146851	115008	79310.6	106302	169299	113322	149900	137360	57383.9	108770	82496.1	240500	169584	122680	100101	76656.7
119	Cystathionine	C00542	Serine biosynthesis and one-carbon metabolism	223.076	0.162	[M+H]+	411306	361158	469453	472542	409635	361972	388573	403134	253411	175219	395917	290089	1.02233e+06	1.12819e+06	976805	858700	957132	1.15742e+06	1.20102e+06	1.15471e+06	1.15584e+06	1.5162e+06	1.17064e+06	1.55816e+06	388639	406661	413193	792813	331497	333133	602154	347325	594451	393725	643740	380232	596841	1.1519e+06	942154	767351	858945	2.53821e+06	2.28075e+06
120	Dimethylglycine	C01026	Serine biosynthesis and one-carbon metabolism	104.071	0.173	[M+H]+	37173936	28261630	34968048	32295622	31676400	30408422	14130601	13680704	15080549	12111087	13654315	14095100	34111524	29022866	31193410	26834466	30236854	30671710	21890830	21839276	21125266	20653762	21075118	20391254	44689884	55040684	52374380	53585780	43864460	40018640	21132110	20430200	20639254	18802254	17578248	18870390	34481028	38541216	37820448	35341732	41806384	35416316	35343428
121	Phosphoserine	C02532	Serine biosynthesis and one-carbon metabolism	184	0.257	[M-H]-	1.5063e+06	1.78568e+06	1.52675e+06	1814526	1821085	1.78085e+06	764632	553985	784652	678538	620946	765481	1.05933e+06	764603	888213	898053	975510	973367	610899	662098	651567	657990	897973	636394	1.66929e+06	1.99273e+06	1687696	1249436	1.48167e+06	1.73237e+06	664303	638945	599498	848249	820868	721177	915174	683036	837412	606822	722610	548182	528638
122	3-Phosphonooxypyruvate	C03232	Serine biosynthesis and one-carbon metabolism	182.969	0.256	[M-H]-	107228	183970	133941	125836	177611	175350	25344.4	53313.3	62931.6	27604	40368.7	22383.4	60184.3	70878.5	78710.5	89818.7	39925	68780.1	48666	0	24926.8	41147.6	60191.2	35010.9	98468.8	167044	168031	166304	173922	188343	59420.2	25667.4	60231.5	61580.6	55552.4	53104.6	19051	38166.5	31761.8	34893.4	76111	17969.2	0
123	S-Adenosyl-L-homocysteine	C00021	Serine biosynthesis and one-carbon metabolism	383.121	0.251	[M-H]-	14222.6	0	25114.2	0	1732.56	6277.52	2065.8	1438.61	1890.81	0	18444.1	0	0	1497.64	85069.9	18195.8	37259.6	0	3854.4	7037.72	169663	0	20167.5	17746.2	24990.1	64310	21930.7	21889.7	1290.15	8715.91	2937.08	0	2087.97	0	6902.49	44969.8	31053.2	25216.5	6061	29514.4	51687.8	29150.1	18121.2
124	S-Adenosyl-L-methionine	C00019	Serine biosynthesis and one-carbon metabolism	399.142	0.177	[M+H]+	999990	1.2396e+06	1.17907e+06	901012	1.11388e+06	1.17375e+06	274567	356433	367301	412123	243016	344651	841124	417767	639733	634295	545821	706104	487318	612650	425234	604968	478116	519453	830398	896332	876136	873180	1.07022e+06	939468	562636	641475	664814	539961	673673	615529	800568	1.08186e+06	1.09828e+06	724049	878560	1333465	1.27298e+06
125	Folate	C00504	Folate pool (One carbon metabolism)	440.133	0.564	[M-H]-	13369.1	23270.5	0	0	23264.5	17021.7	1622.51	4019.64	5295.46	2117.14	0	2087.69	0	0	0	12416.1	0	0	0	0	4185.56	0	3639.75	0	202313	75772.6	88378.1	107559	87584.8	66462.4	12548.3	5789.96	9590.51	8755.08	11122.5	10388.7	33864.1	5936.5	42275.3	47543.2	36059.2	12115	11220.3
126	5-10-Methenyltetrahydrofolate	C00445	Folate pool (One carbon metabolism)	455.156	0.604	[M-H]-	1.08368e+06	1.15587e+06	1.21471e+06	975976	1.15224e+06	1.37236e+06	51144.5	76037.8	28224.5	19465.5	74903.8	81074.6	416326	326006	457253	502450	444853	558784	43349.9	38812.8	44478	41895.2	82133.2	61235.4	877732	1.1756e+06	900238	708344	1085544	991629	77459.3	63617.7	66317.9	91150.4	38326.9	82720.6	439669	296788	447521	500278	301162	51469.3	28858.2
127	Dihydrofolate	C00415	Folate pool (One carbon metabolism)	442.155	0.622	[M-H]-	258300	226984	118306	172592	271844	320098	15747	17594.5	38978.4	18656.8	20184.1	23891.5	169908	187479	207073	168874	185548	180703	47090.7	30696.7	0	27725.7	30152.9	29146.8	223492	289663	216592	152478	562146	471992	15058.1	35042.7	16852.9	37110.1	4941.88	0	279457	128817	225529	272363	211300	9296.4	0
128	Ornithine	C01602	Urea cycle	133.096	0.166	[M+H]+	603146	708269	687709	561431	801631	647396	210345	116227	121097	185680	148379	132739	1.25661e+06	1.41949e+06	1.05216e+06	1.33922e+06	1.1334e+06	1.4812e+06	682053	654004	588310	548559	437300	747199	551089	600162	413518	579671	768294	698737	258865	232549	181516	121498	163233	292194	1570448	1.60009e+06	1.37043e+06	1.15956e+06	1.36709e+06	1.76699e+06	1.69213e+06
129	L-Citrulline	C00327	Urea cycle	176.102	0.175	[M+H]+	2.26054e+06	2.07489e+06	2777769	2.25309e+06	2.57672e+06	2.00929e+06	334017	384809	213442	303287	185121	136550	280009	104940	176730	122552	214315	182245	85854.8	69732.8	139557	75938.7	73008	206288	2.57488e+06	3524998	2.54285e+06	4.66482e+06	2.86547e+06	3571235	924894	818505	800720	362081	474014	385197	303469	178386	292725	228731	265411	404863	630292
130	Argininosuccinate	C03406	Urea cycle	289.115	0.235	[M-H]-	80858.8	71535.5	51551	102153	46233.9	105479	0	7089.78	0	0	0	4846.48	82079	71827.6	89627.9	110290	91147.1	107176	12841.6	21173.8	22193.5	8722.56	14357.4	24240.7	49645.3	83447.9	57149.6	66402.8	58542.6	64904.6	19489	14529.5	36219.5	0	10682.3	10406	120399	95203.8	112200	77641.5	102142	98526.1	112119
131	5-Methylthioadenosine	C00170	AA Catabolism	298.095	0.487	[M+H]+	1.54146e+06	1.48124e+06	1.3044e+06	776422	1.05622e+06	1.01671e+06	438609	110018	245846	311610	159298	281540	1.05431e+06	502042	813772	796073	838074	1.1226e+06	289771	303156	490406	232690	384511	423401	1.29845e+06	1.27583e+06	1613987	1.48119e+06	1.64549e+06	1.61287e+06	470335	810298	619790	766492	397601	394205	1.32498e+06	1.18809e+06	1714904	1.0685e+06	1410879	842258	673990
132	Cadaverine	C01672	Polyamines	103.123	0.165	[M+H]+	0	0	0	0	0	0	0	0	0	0	0	0	0	0	0	5744.57	0	0	0	0	0	0	0	0	0	0	0	0	0	0	0	0	0	4583.46	0	0	0	0	0	0	0	0	0
133	Putrescine	C00134	Polyamines	89.1084	0.174	[M+H]+	261025	376406	214010	248475	400996	364858	141574	71108.6	90705.3	64003.7	80932.6	27998.5	471102	324603	276393	232824	534674	328158	80414	123173	114004	136697	180104	168286	306672	389459	445797	409244	364697	214369	160488	263297	166682	183258	197566	167918	244181	304688	439734	403546	296973	252373	154153
134	Spermidine	C00315	Polyamines	146.164	0.181	[M+H]+	3441522	5.23034e+06	3645953	3.65183e+06	4.16849e+06	5656976	1.15271e+06	2.0188e+06	709418	1.06373e+06	1581465	1.02902e+06	7.27157e+06	1.54377e+06	3599774	1.88235e+06	3.43204e+06	3396750	2.83342e+06	4.37574e+06	3.0112e+06	1.4618e+06	4.17734e+06	699720	3379718	3652390	5925672	5.0261e+06	5.73308e+06	2461488	3.0856e+06	1.46825e+06	2173808	2.05267e+06	3.56923e+06	1.90284e+06	2.48513e+06	1485851	5.63903e+06	1985705	4.61015e+06	2582505	1.55775e+06
135	Spermine	C00750	Polyamines	203.223	0.202	[M+H]+	455640	441795	444414	373859	450996	276304	1.12888e+06	2.65796e+06	1.50205e+06	1.43193e+06	2.62319e+06	1.35111e+06	382029	145383	189846	86864.5	199357	161857	2953423	1910961	3.06534e+06	1.33595e+06	2.18321e+06	520609	238911	275923	537425	703765	519164	349970	2945618	2.15521e+06	4414256	5.00583e+06	3.47358e+06	6.0175e+06	142873	57236.6	261126	179831	494826	1526059	840302
136	N1-Acetylspermine	C02567	Polyamines	245.234	0.182	[M+H]+	156179	167910	71596.4	228831	217461	221422	63829.9	71968.2	0	43373.1	198067	53724.3	0	55431.7	0	0	0	0	175891	140515	142640	74190.4	170512	0	0	0	0	0	0	0	404070	128596	228577	276630	265236	235978	0	0	0	0	0	95089.7	0
137	N1-Acetylspermidine	C00612	Polyamines	188.174	0.169	[M+H]+	684692	707180	529103	939122	950463	814246	1.30116e+06	677159	1.16911e+06	1.01235e+06	612373	963249	1.12871e+06	936845	864616	785282	2.0595e+06	2.07414e+06	514647	1.03904e+06	809168	797936	1.37204e+06	2577230	1.65988e+06	966828	569083	634937	390152	456887	4.08325e+06	3483137	4124085	3.28563e+06	4.22985e+06	1.78402e+06	1.34203e+06	1.63344e+06	960126	919952	730689	2.71935e+06	1.83136e+06
138	N1-N12-Diacetylspermine	C03413	Polyamines	287.243	0.176	[M+H]+	0	0	0	29037.9	0	38219.9	0	0	0	0	0	0	0	0	0	0	0	0	0	0	0	0	0	0	0	0	0	0	0	0	0	0	28628.8	0	0	0	0	0	0	0	0	0	0
139	Propionate	C00163	BCAA Catabolism	73.0276	0.255	[M-H]-	4319026	4.65089e+06	4.01566e+06	3542111	3985859	4902206	1.34513e+06	1.14793e+06	1.64079e+06	1.44285e+06	1.28586e+06	1325780	3.45299e+06	2.55143e+06	2976740	2.28943e+06	3.40978e+06	3655538	1969368	2.15606e+06	2.02322e+06	2.07559e+06	2.84486e+06	1805839	4764252	4651053	4.26364e+06	4.21599e+06	3.35174e+06	2.78486e+06	1.87097e+06	1.97411e+06	1.6799e+06	1.5888e+06	1982566	1.60184e+06	3521908	4.36972e+06	3293082	2.4673e+06	3.63238e+06	2.70671e+06	2.34841e+06
140	N-Acetylneuraminate	C00270	Aminosugars	308.098	0.259	[M-H]-	106496	111439	90132.2	113073	72010.5	106322	0	0	4162.63	7913.13	0	5010.32	1.18106e+06	1.02223e+06	877650	407415	1.23039e+06	1.35442e+06	334901	270282	593825	325677	344759	280313	193367	99453.6	143809	130511	109850	124839	69261.5	72914.9	36307.9	53204.2	18877.4	59999.2	1.87599e+06	1.85675e+06	1778729	1414081	1.61751e+06	1.37875e+06	1.36125e+06
141	D-Glucosamine	C00329	Aminosugars	178.071	0.251	[M-H]-	214024	178729	191339	192379	334206	227844	25750.5	18782.7	39112.3	11098.3	14060	37615.7	295392	299910	291899	253236	337516	315113	71772.4	26120.7	17315.2	41518	59362.7	25325.6	648695	586890	417872	473932	483911	394881	83537.9	57489	47421.2	77811.3	67067.6	63486.5	280743	331489	333517	284103	436714	88898.1	87487.2
142	Glucoronate/Galacturonate/Fructuronate/Iduronate/Mannuronate	C00191	Aminosugars	193.033	0.244	[M-H]-	575406	175845	295826	291992	211486	237549	69480.8	55717.6	145310	37966	112954	130145	1.09987e+06	754307	587844	445168	1330917	1.00937e+06	505054	403845	319883	334154	672026	10765944	825422	507921	521636	673355	457575	350525	427027	494032	373221	658150	249130	174794	2.17906e+06	753151	2.42338e+06	2.31299e+06	2.87563e+06	2.12418e+06	1.89438e+06
143	UDP-D-glucuronate	C00167	Aminosugars	579.03	0.227	[M-H]-	121727	118040	74548.7	93362.1	106053	131586	18537.1	28302.7	8186.15	11956.3	38234.9	19673.4	131300	54516.4	83508.1	56730.3	38941.6	61380.5	33253.5	47148.2	50482.1	32866	59017.7	17567.2	94117	54315.4	110532	108242	124926	126424	25607.1	20085.1	37587.9	32104.9	50105.2	20909.4	54173.5	37097.7	76623.5	42906.6	90673.2	31083	27076.7
144	UDP-N-acetyl-D-glucosamine	C00043	Aminosugars	606.072	0.231	[M-H]-	5747580	4.76388e+06	3.74236e+06	5.60267e+06	4.96736e+06	6115828	1.96737e+06	1.77066e+06	1693451	1.29135e+06	1.63805e+06	1.8193e+06	3.62884e+06	2.77035e+06	3.50581e+06	2791119	3.92845e+06	3033496	1878358	2.09947e+06	2089533	1.91568e+06	2.61913e+06	1.58299e+06	3.27767e+06	4.2734e+06	3.43126e+06	3.21454e+06	3.43746e+06	4.20193e+06	1.92376e+06	2.00148e+06	2.06586e+06	2.20223e+06	2.58862e+06	1829864	2.95204e+06	2.38465e+06	2189440	2278749	2344072	1.47828e+06	1.52725e+06
145	N-acetyl-D-glucosamine	C00140	Aminosugars	220.084	0.511	[M-H]-	13071081	11316980	8950732	12420237	12750496	13119540	21253876	13548680	21040526	12974864	13441981	17375486	12735951	6.19085e+06	10542052	7.82466e+06	12105496	11418665	15383776	18391768	15604108	18910022	32749330	15863939	15664871	14473624	13081201	14931311	15262357	17167874	13488359	11926617	14279760	14042347	16497364	13493689	13935937	12994251	11615405	8665021	15338069	12803176	14910705
146	CMP-N-acetylneuraminate	C00128	Aminosugars	613.145	0.229	[M-H]-	269553	222227	135044	202020	164405	208254	242446	152180	204484	140856	161329	239290	190477	188668	130809	199307	219465	247569	176740	181606	113550	201461	244242	160147	243078	307072	218931	136900	282947	332384	204903	301226	303472	252177	314849	286596	328821	365052	236192	258294	160592	123308	274166
147	Asymmetric dimethyl arginine	C03626	Arginine and proline metabolism	203.149	0.166	[M+H]+	4820922	5.70864e+06	4.39514e+06	4.16928e+06	4.10432e+06	4.29719e+06	394422	543886	601566	492779	387797	500389	3970008	2.73432e+06	2.93398e+06	3.07935e+06	3927573	3902865	626715	590704	789393	681009	627620	765962	9211204	10410030	8476406	7944878	7131848	5.70944e+06	1.64744e+06	1.04698e+06	1.28248e+06	1.40093e+06	1.27501e+06	1.11643e+06	13376517	11592245	19347990	16334832	13199820	2114515	2.75294e+06
148	Carnosine	C00386	Arginine and proline metabolism	227.114	0.186	[M+H]+	68632.9	54827.9	55234.1	100733	72822.2	21551.7	18080.4	0	53296.6	0	0	0	186212	50128.4	68924.3	41482.5	138553	158700	56936.2	158554	97357	93612.8	160108	65798.6	100629	76934.9	95617.4	49117.7	187004	71723.4	14526.8	0	11428.6	44127.3	7405.93	0	310904	301009	274289	257456	366012	214204	276144
149	Phosphocreatine	C02305	Arginine and proline metabolism	212.043	0.178	[M+H]+	0	0	0	0	0	0	0	0	0	0	0	0	0	0	0	0	0	0	28434.2	0	0	0	0	0	0	0	0	0	0	0	0	0	60317.7	0	0	0	0	0	0	0	0	76881.6	93757.8
150	Creatine	C00300	Arginine and proline metabolism	132.077	0.191	[M+H]+	0	0	0	0	13691.6	0	0	0	0	0	0	0	0	58240.2	0	9493.24	0	0	0	0	0	0	0	0	0	26864.6	93290.3	0	0	0	0	0	0	0	0	0	51487.4	52308.3	63845	55274.7	52945.9	0	8018.07
151	Creatinine	C00791	Arginine and proline metabolism	114.066	0.103	[M+H]+	31100.8	19957.7	18685.7	27135.3	26066.1	30670.4	24120	29398.1	32638.2	21426.5	18795	19427.7	27394.3	30807.5	29240.8	18532.7	27447.1	27391.5	38241.3	23472.3	13750.5	30527.6	28211.6	29031.7	17914.4	36887.4	24842.7	39722.6	23146.7	20734.8	26053.4	33416.6	15802	26963	31893.3	30464	34298	30536.5	27107.6	21530.5	25262.3	31257.5	23933.7
152	4-Acetamidobutanoate	C02946	Arginine and proline metabolism	144.065	0.252	[M-H]-	264046	159703	198687	231232	270587	213383	156691	96666.9	101860	68346.5	124388	104627	578588	273599	348221	260495	302404	389228	258868	201595	171881	256003	360460	165868	625016	385721	448814	369691	228327	240465	249557	207841	185513	209239	182183	126436	1172223	653030	1.46869e+06	1.1889e+06	1.44859e+06	633909	792837
153	N-Acetyl-L-citrulline	C15532	Arginine and proline metabolism	218.113	0.196	[M+H]+	47554.8	0	106529	30241	0	94058.1	0	0	0	48298.2	0	25401.6	69666.3	83000.1	41641.5	53908.1	79437	71126.3	16422.8	0	26730.2	31553.3	0	17846.2	42594.1	53981	42423.4	46447.8	113370	44843.7	0	0	0	0	0	0	102850	83143.5	164345	56366	149628	111176	51546.9
154	N-Acetyl-L-ornithine	C00437	Arginine and proline metabolism	175.109	0.295	[M+H]+	177590	132730	95927.2	197226	96044.7	254940	4224.48	4909.6	8211.36	3798.89	0	13187	261673	213721	215056	143136	140665	116349	83470.3	81568.3	145141	91840.1	40289.9	30717.2	367814	305072	305247	324450	585024	381993	7116.74	0	6698.69	0	4842.12	0	461012	746349	890649	607646	604866	238935	125512
155	Aminofructose 6-phosphate	C12214	Arginine and proline metabolism	258.037	0.236	[M-H]-	835535	746612	641531	819794	1.0068e+06	928405	550256	421557	713777	543396	468723	520780	638378	767711	737489	659615	844456	837030	551584	647632	673365	765957	756976	717777	964434	1.0967e+06	906286	947491	902820	1.15683e+06	796778	851708	688526	833484	1.00373e+06	877228	828240	798604	709269	619926	789221	908710	797316
156	Pantothenate	C00864	Panthothenate metabolism	218.103	0.251	[M-H]-	19949520	21864902	16229196	20197586	20842776	23765226	3445322	2.20636e+06	3.82089e+06	2.58981e+06	2.68403e+06	2.99093e+06	6820564	3876808	7344354	4.36281e+06	6309632	5.74479e+06	3.23141e+06	3469551	2287412	3.36705e+06	4.72645e+06	2.12346e+06	18886914	17722340	19619146	18761136	22198454	24063150	5442986	5.53883e+06	4.95288e+06	6.4463e+06	5608834	4.17648e+06	6035874	5794528	8748125	6410826	8407848	5550648	6.28266e+06
157	D-4-Phosphopantothenate	C03492	Panthothenate metabolism	298.068	0.341	[M-H]-	39355.3	5855.63	23340.8	65586.4	32205.8	15656.2	18372.8	8309.95	10908.8	17443.4	8749.97	16846.7	29364.5	28279.6	18280.8	28309.9	44165.8	21453.9	12890.4	9143.62	13785.7	14479.8	27917.3	16432	54887.2	49279.2	38984.2	16075.3	40113.8	65844.6	22349.6	20023.9	15437.5	20418.1	26473.8	19977.2	32829.8	23244	49565	55779	29362.4	22388.1	20037.4
158	Pantetheine 4--phosphate	C01134	Panthothenate metabolism	357.089	0.262	[M-H]-	0	0	0	0	0	0	0	0	0	0	0	0	0	0	0	0	0	0	0	0	2299.43	0	0	0	0	0	0	1716.33	0	0	0	0	0	1922.3	0	0	0	0	0	1364.03	0	0	0
159	5-6-Dihydrouracil	C00429	Panthothenate metabolism	113.034	0.25	[M-H]-	1.63605e+06	1535757	1497692	1.5758e+06	1.75728e+06	1.77111e+06	303511	357388	287814	270831	270971	325196	1746261	1.38335e+06	1.62768e+06	1.53973e+06	1.81401e+06	1.64193e+06	636765	595446	691979	640673	907513	647705	1.10455e+06	1.13353e+06	1.08825e+06	999003	1769887	1.53872e+06	455134	421449	377482	468216	373139	389172	1.9674e+06	1.94979e+06	1.76827e+06	1.4953e+06	1.79838e+06	1.20906e+06	1.00323e+06
160	Pantetheine	C00831	Panthothenate metabolism	277.124	0.55	[M-H]-	379110	371319	321391	336036	418973	377305	57843.8	62211.7	72525.4	87690.7	75405.2	77325.9	123217	51173.4	74497.2	71418.6	118983	86276.7	70070.8	90596.4	79539.8	74304.4	75940	83974.8	246677	267433	299899	255864	241756	234857	117767	59929.5	93334.9	82426.2	87279.1	68606.4	170191	59152.5	125320	129350	123242	137878	158314
161	Taurine	C00245	Sulfur metabolism	124.007	0.247	[M-H]-	68505320	62912332	60556660	76095600	76123776	74170200	74633376	66150476	81043480	63728928	63404036	68679448	71799480	70101080	74726904	64112756	78516936	80631400	82361560	79963592	70668864	87095360	100909952	68968144	62205692	57619220	55726796	54458228	63876276	59341004	79590984	76182144	63324172	79731272	77557592	79539768	66510772	67548360	64506396	60363340	66535428	92145432	83007688
162	Hypotaurine	C00519	Sulfur metabolism	110.027	0.198	[M+H]+	0	0	0	49711.1	0	0	0	0	0	0	0	0	0	0	0	0	0	0	106213	88255.4	109130	11931.5	92962.7	109920	0	0	0	0	0	0	6127.68	0	0	0	8358.9	0	0	0	0	0	0	183036	125042
163	3-Sulfino-L-alanine	C00606	Sulfur metabolism	152.001	0.25	[M-H]-	30101.3	0	0	0	1195.75	0	0	0	0	6484.88	1390.41	0	2175.32	27675.8	19140.3	17509.2	6039.68	26375.5	2386.02	17846.2	0	1433.93	0	0	14067.9	11944	0	0	29233.2	971.94	1560.58	1068.97	1768.94	1555.16	1629.81	0	33507.9	28750.9	0	19729.5	0	0	0
164	(R)-S-Lactoylglutathione	C03451	Sulfur metabolism	380.111	0.251	[M+H]+	0	15025.7	0	0	0	0	0	0	0	0	0	0	13866.1	0	0	0	0	0	0	0	0	0	0	0	0	0	10636.3	30785.6	10094.8	0	0	0	0	0	0	0	16433.7	12503.3	0	0	11458.5	0	0
165	L-Methionine S-oxide	C02989	Sulfur metabolism	166.054	0.185	[M+H]+	10944091	14222137	10228961	9250001	6.18347e+06	6007996	18300434	15013377	18507818	12518248	17885510	14056829	11668627	7.04235e+06	3.36955e+06	2.2482e+06	15414093	5808170	1.34876e+06	1066586	1.59608e+06	1073501	1.93765e+06	1.13801e+06	4207171	2.09796e+06	6.84049e+06	7.9301e+06	2.71181e+06	7.15526e+06	9614479	8.16651e+06	8694803	9348941	8137868	6.33773e+06	22990854	21274800	27357730	20293382	24802312	10034201	9625317
166	6-Hydroxykynurenic acid	C08480	Indole and Tryptophan	206.045	0.505	[M+H]+	150063	169813	99580.4	193422	104626	146721	181292	316785	208831	143933	391849	112702	395229	489012	131828	208858	235878	279563	262818	206132	327590	275305	355530	305290	18808610	18890958	18341098	14583357	13345381	16461801	8.31627e+06	7.39498e+06	8473497	10485706	8959560	5.4621e+06	23232502	12530787	21804222	12800804	20315118	8729379	9203949
167	Kynurenine	C00328	Indole and Tryptophan	207.078	0.387	[M-H]-	438690	430001	441569	471263	432608	516488	8982.62	5799.72	5950.48	2726.4	9421.19	8941.47	288842	341616	283838	226523	252810	335926	40027	48222.9	19785.4	17951.6	31756.1	31778.8	811598	958010	853763	799436	869358	1.07206e+06	194520	248152	165643	211003	187770	207711	792794	1.23043e+06	932990	1.04648e+06	944552	718654	532831
168	Kynurenic acid	C01717	Indole and Tryptophan	190.049	0.572	[M+H]+	160086	145998	146315	208556	131595	142008	101270	77042	70666.2	67459.7	68185.8	57903.6	518019	452948	361940	443766	344664	369978	498948	475986	279912	372008	548623	442090	3.60812e+06	3.18803e+06	2.82879e+06	2.93543e+06	2.26054e+06	2.79547e+06	1.66854e+06	904152	1.06795e+06	1.23413e+06	1.28588e+06	1.0756e+06	5.05581e+06	5.50294e+06	5.64789e+06	3.62282e+06	5238447	5.80149e+06	6.40219e+06
169	Quinolinic acid	C03722	Indole and Tryptophan	166.016	0.245	[M-H]-	221609	216065	187629	202640	193533	227346	209802	278698	269281	190618	215072	218337	254631	199287	278516	279883	283947	294683	279239	224425	245710	265748	303377	213225	321799	362448	222261	253912	238392	234630	384833	287066	212343	307703	391738	227467	676826	433892	403970	356268	391206	419003	348622
170	N-formyl kynurenine	C02700	Indole and Tryptophan	235.072	0.433	[M-H]-	9540.2	8313.88	8045	6519.75	4618.1	6362.8	4653.67	4113.64	0	0	1931.78	1773.67	3522.4	11512.4	5628.7	7880.5	5200.15	3383.7	2363.56	3655.7	5410.14	5201.51	4273.7	2033.59	897728	877274	1.02715e+06	884815	845209	922874	151588	171690	123416	167871	164763	164808	680488	959420	747473	847052	586378	300316	224879
171	2-Aminomuconate	C02220	Indole and Tryptophan	156.029	0.246	[M-H]-	662038	548324	675793	568554	734031	763552	664399	679308	768028	535912	514851	582807	617841	556254	804879	370330	664665	664087	803578	769762	652229	892090	1.21529e+06	613355	759121	532976	703833	649410	719687	764968	823345	720167	779309	1.05632e+06	931435	881845	765155	676059	818784	858555	954425	1053871	900256
172	3-4-Dihydroxy-L-phenylalanine	C00355	Tyrosine Metabolism	198.077	0.396	[M+H]+	100148	105923	71212	83522.1	88562.4	78696.1	30912.5	14464.6	27077.7	24027.3	54477.2	30777.1	117588	64046.9	91844.7	71301.4	66380.3	87834.8	49780.7	36719.9	35408.2	20198.9	34893.3	28917.4	104251	95281.5	91998.6	97522.8	91546.8	60571.9	41892.2	45570.1	31777.2	39938.4	43719.7	43290.5	58398	44221.4	50446.3	63198.9	72088.4	48605.7	18344.1
173	L-Normetanephrine	C05589	Tyrosine Metabolism	184.096	0.386	[M+H]+	561739	572989	452606	560683	505723	566415	90761	88006.5	102966	89254	90385.4	100673	186567	137719	201128	154418	178688	201682	92168.1	86551.1	85212	89469.5	107408	63189.9	513196	614533	577617	466394	757416	710879	144255	146514	161478	157931	131579	168578	186030	171186	226663	212501	246336	170810	155989
174	Homovanillate	C05582	Tyrosine Metabolism	181.049	0.255	[M-H]-	86780.8	91749.4	188812	98416.6	124013	51808.2	17961.7	8947.86	13054.3	25655.5	9165.21	14212.2	98973	14732.2	56892.1	30983	17690.8	30226.7	20532.8	22667.5	28957.8	18635.9	26217.3	17860.5	90437.2	216520	140943	197353	318515	261772	81440.7	48445.8	64605.6	64751.6	52319.8	79917.6	124757	72565.3	215841	118391	158657	127621	149762
175	4-Hydroxyphenylacetate	C00642	Tyrosine Metabolism	153.055	0.656	[M+H]+	495441	444693	480048	445288	389487	410317	459668	367299	398377	378926	337291	422695	466321	372315	402408	448338	400841	350040	427267	432915	328204	333338	404608	504416	1.02265e+06	1.13199e+06	1.66546e+06	392694	481489	358191	398497	403464	304884	335239	377890	304972	487819	343692	458121	343121	411579	387199	475467
176	4-Coumarate	C00811	Tyrosine Metabolism	165.055	0.283	[M+H]+	9733994	8534677	9719617	9516824	9716884	10700055	3.00962e+06	2.20755e+06	2.74445e+06	2.14002e+06	2.03267e+06	2503949	10604122	6.43351e+06	9663519	7944832	10061862	11129771	3.61836e+06	3705848	4.29331e+06	4.04146e+06	4.97039e+06	3.6636e+06	7.36176e+06	8008510	6690240	6604444	6.18504e+06	6022964	2.13056e+06	2.25172e+06	1.98017e+06	2.32515e+06	2.39841e+06	2196485	8877303	8537670	9371198	6.50433e+06	6478860	4.92093e+06	3682267
177	3-(4-Hydroxyphenyl)pyruvate	C01179	Tyrosine Metabolism	179.033	0.266	[M-H]-	15107.2	18101	7999.37	10352.9	16501.1	36110.7	9976.11	27647.8	21506.2	16531.3	20494.1	12840.8	8526.5	16028	18535.3	46979.5	10843.4	18658.9	37929.9	10887.6	42115.2	21071.1	34782.1	16728.8	22634	17441.4	8680.01	16979.6	16952.3	15034.5	107388	88661	48677.1	68750.2	87701.5	62513.5	23808.3	38091.8	25617.1	35457.8	50968.9	134986	101891
178	L-Adrenaline	C00788	Signaling	184.096	0.386	[M+H]+	561739	572989	452606	560683	505723	566415	90761	88006.5	102966	89254	90385.4	100673	186567	137719	201128	154418	178688	201682	92168.1	86551.1	85212	89469.5	107408	63189.9	513196	614533	577617	466394	757416	710879	144255	146514	161478	157931	131579	168578	186030	171186	226663	212501	246336	170810	155989
179	Dopamine	C03758	Signaling	154.086	0.521	[M+H]+	1.6904e+06	1.23106e+06	1.17597e+06	1.89165e+06	1.42134e+06	1.37145e+06	703440	914313	1.00281e+06	425844	813680	584139	880749	1.21328e+06	1.10756e+06	741918	1.10844e+06	1.0317e+06	638328	427119	401794	492942	729516	446701	721400	1.12393e+06	1.32207e+06	1009605	1.47353e+06	1.5107e+06	748598	745485	639248	787231	791297	788606	446593	732592	588654	533277	555671	165654	131660
180	Ectoine	C06231	Inositol	141.065	0.254	[M-H]-	151009	76686.9	141851	71154.3	109676	159583	14325.2	20836.1	46648.7	20433.2	23411.7	32305.7	183980	123600	127810	171785	158270	171376	40884.2	72979.9	48855.7	110522	76768	41525	166082	134078	158828	158082	139841	117686	36536.9	26722.8	59223.7	70697.2	26981.9	61644.3	163309	140232	147599	116559	209083	135132	80399.3
181	sn-glycero-3-Phosphoethanolamine	C01233	Glycerophospholipid biosynthesis	216.063	0.174	[M+H]+	2.70042e+06	2.37759e+06	1.89975e+06	2773273	2.73749e+06	2.42831e+06	1.73498e+06	1.3148e+06	1.53883e+06	1.39917e+06	1.44025e+06	1241522	2.04894e+06	1.88568e+06	2.59548e+06	1.51299e+06	1.99256e+06	2.30626e+06	1.62546e+06	1.40319e+06	1573129	1.64433e+06	1.62864e+06	1472077	2.36691e+06	2.18012e+06	3.45569e+06	2.66529e+06	3.55969e+06	4.17209e+06	1.57416e+06	1.76155e+06	1.29045e+06	1.36413e+06	1.563e+06	1.65356e+06	2.13373e+06	1724443	1.41687e+06	1.58098e+06	1.868e+06	885031	883736
182	Glycerol 3-phosphate	C00093	Glycerophospholipid biosynthesis	171.006	0.233	[M-H]-	11020737	10456815	8645903	10654668	10588120	12775307	4.71424e+06	3.43586e+06	4.83476e+06	4750495	4669184	4373380	22305610	19119106	19801882	18630138	23166880	21692608	7.58755e+06	8231392	8.26078e+06	9285702	10014307	8425375	13526756	11956247	12370139	11536928	13196432	13986880	6.14927e+06	7741666	7.56072e+06	7.18218e+06	7.36846e+06	7717886	20892346	20140530	19500302	17928008	20021488	13189852	12128856
183	Diethanolamine	C06772	Glycerophospholipid biosynthesis	106.086	0.187	[M+H]+	59732.9	108833	130182	157830	92864.6	134458	226715	114817	255214	317805	170469	180080	120483	158364	69867.3	183375	137315	230602	205283	81939.6	166572	127940	313641	310977	262364	560445	150824	161629	200804	207354	188635	266127	384491	284033	303287	270040	170174	142450	174154	152292	103879	171317	151945
184	Triethanolamine	C06771	Glycerophospholipid biosynthesis	150.112	0.204	[M+H]+	30522.2	22514.1	17262.6	32644.2	27725.5	17479.6	26133.8	38420.1	37835.9	27652.5	28388.5	35711.7	48986.4	29007.3	23431	25933.5	36724.8	23742.9	18867.2	36220.8	40053.9	40296.3	31636.6	22636.4	42432.5	30271.8	26947.2	42902	46014.8	14565.7	37665.3	17574.5	55753.6	53583.5	55159.5	45031.9	19724.6	43219.3	18162.2	43520.5	20389	20468.9	38504.6
185	Phosphoethanolamine	C00346	Glycerophospholipid biosynthesis	140.01	0.251	[M-H]-	11403717	13945205	12207028	12230987	12128165	11693456	6522912	3.99113e+06	4.98901e+06	4.44885e+06	4078070	5.07772e+06	14474880	13016367	11500803	12933887	13138448	13385632	8804709	9147691	8402469	9842984	12414880	7435132	19366180	17897398	18318978	21283378	17705864	17439548	9833348	7512404	8022552	8401042	8522087	7.28629e+06	17842590	15620099	18630644	15535688	16032744	15669359	16157775
186	CDP-ethanolamine	C00570	Glycerophospholipid biosynthesis	445.051	0.235	[M-H]-	3.03838e+06	2434079	1560952	2.49665e+06	2.6305e+06	2851080	321564	347359	288981	267527	334141	342464	1.40202e+06	934048	1.51303e+06	1.0243e+06	1.75547e+06	1.89333e+06	368721	351616	313502	379418	375598	298890	2326664	2.93028e+06	3.42072e+06	2333741	2.9294e+06	3.94585e+06	516108	420742	444837	496447	480708	395036	1.00959e+06	1.14517e+06	1.16664e+06	995478	1.36962e+06	555773	493252
187	N-Methylethanolamine phosphate	C01210	Glycerophospholipid biosynthesis	156.041	0.169	[M+H]+	4.16427e+06	5.53961e+06	5858632	3.5406e+06	3.54006e+06	3254244	636586	525592	814976	1.00717e+06	768242	1800364	832300	1026328	979794	840836	1757244	869971	582500	494876	716667	583138	589279	1.20624e+06	14578667	16204123	14118521	13886992	13013352	12821813	4808108	2.12748e+06	2.1194e+06	1661750	1420452	1.08654e+06	19280706	10721897	27039082	15802128	11874561	1.90653e+06	2.46776e+06
188	Phosphodimethyl-ethanolamine	C13482	Glycerophospholipid biosynthesis	168.041	0.255	[M-H]-	9931887	12459456	9426975	9998785	10729528	11050460	9418853	8.01231e+06	9781328	8.32461e+06	8.08229e+06	8.23833e+06	7970044	7.98213e+06	8741484	8445309	8667851	8073380	7.85848e+06	8.31848e+06	8.15206e+06	8781423	10678905	8.08663e+06	18011546	15572155	17610336	15702073	15094213	15353453	13049344	12473637	11540316	12916140	12206945	10651125	14319221	12943664	15680052	12376289	15154381	16244199	15813209
189	Phosphocholine	C00588	Glycerophospholipid biosynthesis	185.079	0.368	[M+H]+	72834.9	165398	118551	114327	143108	200017	849400	394211	535256	863626	114676	810357	150995	84668	56869.6	356605	168120	253484	199360	623659	166793	482505	905146	486602	3.13047e+06	2258763	1.43188e+06	1.13192e+06	727176	1.53769e+06	1546420	557867	789824	1.27864e+06	2.58241e+06	378458	3.83093e+06	1.39164e+06	1515288	500360	1743573	2.5388e+06	2.09072e+06
190	CDP-choline	C00307	Glycerophospholipid biosynthesis	487.097	0.238	[M-H]-	32106.2	37814.8	22853.8	50667.2	31422.9	18113.4	16384.3	15091.6	25457.7	0	20394.7	8504.12	15323.3	7100.52	19555.1	25752.9	19916.9	40359.7	15802.8	24442.9	8399.97	0	15110	6214.13	69835	29022.4	68575	26084.9	26947.6	22454	28698.5	8853.38	0	0	0	21709.3	24787.2	21859.1	23606.9	54836	30109.8	21707.7	36917.8
191	sn-glycero-3-Phosphocholine	C00670	Glycerophospholipid biosynthesis	259.118	0.642	[M+H]+	32805.7	11255.7	35275.4	38660.8	27628.8	25635.7	18553.8	18034.7	15427.6	25741.3	35028.4	11281.6	360249	271198	321347	256276	263540	354274	135050	149323	83081.1	114370	183644	169644	35544.9	38267.8	31160.5	38702.8	23470.1	43257.8	32845.2	52125.3	43149.5	45663.6	29457.8	26380.7	129801	40133.9	155248	101847	119827	83055.5	106536
192	Serine-Phosphoethanolamine	C03872	Glycerophospholipid biosynthesis	229.057	0.171	[M+H]+	59241.1	115007	122383	51657.6	147065	82178.3	0	0	0	42174.5	0	0	68135	70803.3	79728.2	0	63450.9	0	0	0	0	0	0	0	199398	218121	141925	75643.6	111841	54987.8	0	85178.1	51268.9	0	0	53523	159289	164745	136446	130459	74275.7	0	60566.3
193	Acetoacetate	C00164	Ketone Body	101.023	0.253	[M-H]-	3.23933e+06	3.12675e+06	2.765e+06	804346	3125409	3277197	206156	1.10262e+06	1.08422e+06	992900	1.04854e+06	719277	1.68829e+06	1.90662e+06	2.65252e+06	1.3359e+06	2.59998e+06	2.76347e+06	1.38791e+06	885004	1884459	1.85162e+06	1.13902e+06	523319	2.94886e+06	2438884	2.51801e+06	1.57469e+06	3349198	3.54845e+06	822676	1187297	1.46469e+06	1.55569e+06	1.72635e+06	845868	2935762	2623111	3.17494e+06	2.39316e+06	3108744	2.54269e+06	2.03401e+06
194	L-Carnitine	C00318	Carnitine and fatty acid metabolsim	162.111	0.166	[M+H]+	417474208	468662304	391093792	517335200	450867456	522263136	387742240	408790912	430917472	369824512	398322304	371316128	670353600	517329376	597855040	453427872	583872448	614544960	416652384	469459456	452575648	414475104	545897920	384092064	405358240	390202784	380487264	387607168	441155552	401835680	438510048	375915616	323717280	390815872	426877600	378223776	378323712	349481632	385092768	377456224	387838432	301947680	303920992
195	AC(2:0)	HMDB0000201	Carnitine and fatty acid metabolsim	204.124	0.17	[M+H]+	110684248	126094720	114887552	136708016	128787816	110510552	88859352	89283264	113200472	108633896	92102760	86253784	92662936	79062624	86257272	69778712	89866688	69752536	160244432	192665664	173531008	148980320	173890864	131337832	167575232	157662176	200008000	208087744	129333632	118613656	129222912	133716296	114382752	95084328	111152768	114342984	53967436	91406720	76431768	61915580	80062144	217403776	203286272
196	AC(3:0)	HMDB0000824	Carnitine and fatty acid metabolsim	218.139	0.226	[M+H]+	8656300	9051883	8432409	10748005	10234001	11392699	2.17639e+06	2.36469e+06	2.58794e+06	2.62768e+06	2.55644e+06	3032168	23012520	15305955	28161626	20896992	21018048	19685618	11443308	12597469	12532801	12887483	16235803	11755907	9895083	7.26754e+06	8785791	11034385	6.92176e+06	6412328	4.91495e+06	2.17274e+06	4057381	1.5055e+06	1775348	2.58969e+06	12153475	8556311	17824980	13699840	14923917	14868741	11192688
197	AC(3:1)	HMDB0013124	Carnitine and fatty acid metabolsim	216.124	0.623	[M+H]+	71331	66588.4	74588.1	68689.7	64585.5	79150.8	105699	77588.1	93320.7	53726.6	77719.4	72006	84519.1	66493	44749.5	60034.2	64252.6	43214.6	54945.7	75150.9	29455.7	62898.6	60617.2	82179.4	311434	238215	178604	140502	131248	108748	128390	76641.4	78201	129155	111307	70199	130358	123789	87501.9	122513	117722	65183.7	82867.9
198	AC(3-OH)	HMDB0013125	Carnitine and fatty acid metabolsim	234.133	0.243	[M+H]+	27011.7	31313.8	39947.4	17285.1	29006.4	14898.2	12666.6	8620.24	52925.2	9574.67	10277.6	18302.5	63599.3	42255.8	16889	51677.4	28530.8	44189.2	10224	9615.89	13883.4	10763.7	7722.59	13068.4	39109.3	40579.6	13309	47071.2	22634.4	61940.9	4930.91	10794.4	50283.2	21527	0	14639.3	42586.9	34964.4	49064.6	37011.1	33251.2	17351.4	27034.4
199	AC(3-DC)	HMDB0062592	Carnitine and fatty acid metabolsim	248.111	0.193	[M+H]+	468509	519892	452433	558233	523379	563451	62846.8	23147.4	24944.5	28835.4	36808	59276.4	1135227	884111	1.00902e+06	820078	715111	655645	149165	76581.5	167457	132532	184791	205661	641256	570834	398080	380343	494957	392306	262780	144548	169936	145125	116046	131164	831952	647198	602181	653700	707248	298701	275674
200	AC(4:0)	HMDB0002013	Carnitine and fatty acid metabolsim	232.155	0.39	[M+H]+	5.11209e+06	5.36586e+06	4972626	5434654	5.68842e+06	5932432	1.0049e+06	1.27474e+06	977858	1.07153e+06	828902	1.29196e+06	11878859	7.41575e+06	11929219	8595715	11322292	12636445	6.30287e+06	5.91777e+06	6.76901e+06	5.90709e+06	8230724	5.75029e+06	3628706	3343855	4.02839e+06	4.51872e+06	3.79696e+06	4.01383e+06	4.39219e+06	2.97308e+06	3.89746e+06	3689457	2.34505e+06	3080838	7.18423e+06	4.24893e+06	9135975	6829544	6.22427e+06	7.38952e+06	6005432
201	AC(4:1)	HMDB0013126	Carnitine and fatty acid metabolsim	230.14	0.655	[M+H]+	40530.4	47488.2	52792.2	68564.9	31268.8	38290.7	61424.8	40751.4	58406.2	66098.6	51400.8	68515.3	63500.3	58513.3	47761.8	68182.4	46988.9	38444.3	57909.4	32458.9	48766.7	61715.1	40206.4	32631.2	177892	168898	131770	115446	74230.6	77041.9	67479.7	69706	68251.4	64811.5	65788.8	64904.4	103403	84429.4	80728.3	71969.6	56199.8	46113.5	61433.5
202	AC(4-DC)	HMDB0013133	Carnitine and fatty acid metabolsim	262.126	0.341	[M+H]+	291099	267249	321252	303344	310309	295358	12669.2	21019.2	32863.8	10223.6	11803.3	12583.6	564467	490443	423580	362947	452233	527214	105517	92896.1	96079.7	83355.1	56555.7	125257	460649	299764	231244	267775	304311	336158	141235	94784.8	111517	119146	78361.1	91772.8	374493	377480	301482	338828	318156	140359	153891
203	AC(5:0)	HMDB0000688	Carnitine and fatty acid metabolsim	246.171	0.616	[M+H]+	330590	406033	372619	364651	401472	383178	185655	74822.5	96004.7	52864.2	97970.1	93100.5	289319	252131	406955	239382	245682	286354	169979	180147	189011	222202	260574	179026	3.60966e+06	3125509	3954562	5.15547e+06	4.15576e+06	4508777	1.17904e+06	2014175	1.10744e+06	784986	726381	1.36912e+06	1.62275e+06	2.61554e+06	1939694	1.4921e+06	2005681	6.00214e+06	4.46707e+06
204	AC(5:1)	HMDB02366	Carnitine and fatty acid metabolsim	244.155	0.655	[M+H]+	73539.9	50879.1	75132.3	53592.3	49436.9	39155.3	89358.2	55054.9	41581.5	38980.6	54970	46215.8	84832.4	73643.8	46612.2	90518.5	48561.6	50188.8	61522	44381.7	44393.7	43437.5	26275.4	65419.6	369624	196763	355356	336363	147891	144982	108528	144913	146457	134703	140284	149214	182578	160934	65822.4	48343.8	53760.6	56433.1	45857
205	AC(5-OH)	HMDB0062555	Carnitine and fatty acid metabolsim	262.166	0.656	[M+H]+	26012.1	19767	39410.7	30465.3	40324.7	15401.6	35547.3	24225.5	35081.2	42422.8	28749.2	12112.6	37090.8	38561.2	35305.1	32264.5	11153.1	14656.4	17648.3	10872.7	14319.3	28621.8	14806.6	37006.1	127980	117862	50307.1	117622	61605.8	44999.2	44396.5	60231.9	49633.1	58015.9	50614.9	67815	183335	54517.7	44040.8	31004.8	27949.9	46215.3	28544.8
206	AC(5-DC)	HMDB0000552	Carnitine and fatty acid metabolsim	290.157	0.543	[M+H]+	77284.5	111663	94469.5	159726	142194	120630	74594.7	59027.5	82524.8	62498.9	94194.8	71790.2	76340.4	112204	80624.5	75645.8	71289.5	68425.4	82322.4	63884.1	70561.8	65407.8	50904.3	71456.4	246636	165371	267312	256247	173483	146714	144670	156410	162488	158807	155141	151858	131469	224388	96607.5	156163	88627.4	72486.9	84346.5
207	AC(5:1-DC)	HMDB0013129	Carnitine and fatty acid metabolsim	274.126	0.622	[M+H]+	35427.3	31898.4	40241.1	30259	38961.1	34292.4	30735.8	31933.8	56845.9	36955.5	41721.6	31975.4	47971.3	34362.7	56157.6	26015.6	29745.5	42056.2	24435	39856.5	40705.1	32538.3	40893.8	39041.6	36182.9	38804.8	50927.6	53023	72670.2	64182	40071.7	49160.1	43791.8	48047.2	46934.4	27428.8	67927.6	59524.8	58765.2	63506.1	37814.6	53045	110420
208	AC(6:0)	HMDB0000705	Carnitine and fatty acid metabolsim	260.186	0.63	[M+H]+	3.65026e+06	3.93501e+06	3.45909e+06	3.74146e+06	4.01985e+06	3551375	932232	560473	828780	534776	803181	818169	2.37832e+06	2.63731e+06	6629180	1.61653e+06	3380697	6.40667e+06	1.28474e+06	1.55263e+06	1404088	1.78886e+06	2.19294e+06	1.51216e+06	3625468	3621296	4.01174e+06	4084962	3.64933e+06	3905541	547338	548462	508637	560896	512659	498022	787677	1.13384e+06	777751	842924	700353	341602	358943
209	AC(6:1)	HMDB0013161	Carnitine and fatty acid metabolsim	258.171	0.553	[M+H]+	309482	250348	316746	232640	211891	313048	321485	253770	196176	321098	214366	267764	341035	199019	328126	408626	317978	353887	219645	257188	325849	230559	275734	209419	1.36134e+06	897614	1603259	2.01475e+06	806613	666351	609461	593726	645775	754541	589482	771781	751976	750986	261134	236878	259019	148190	151178
210	AC(6-OH)	HMDB0061633	Carnitine and fatty acid metabolsim	290.198	0.642	[M+H]+	83149.9	34176.3	38465	34588.4	19819.3	25928.2	94725.6	22663.5	25279	23998.2	8958.15	13884.9	83644.5	26677.8	30157.7	106562	36349.1	38767	50430.9	29343	9068.08	8474.62	12968.8	16031	138296	65659.9	87604.3	89042.3	29227.4	32164.5	16516.2	23809.3	29754.7	48381.8	29673.6	30914.9	49605	65878.8	10796.3	12832.4	25941.9	20280.2	7354.98
211	AC(7-DC)	HMDB0013328	Carnitine and fatty acid metabolsim	304.173	0.519	[M+H]+	732412	742738	787628	709931	828315	714806	117270	78353	119656	69619	52423.8	113607	1.66677e+06	1.16295e+06	1132293	1.37712e+06	1500343	1.29839e+06	181092	173632	201270	161158	169026	197308	1.20655e+06	959090	799578	822819	730309	843122	344662	389625	381595	441490	243644	325020	1.1416e+06	905227	852981	917389	779635	401801	346531
212	AC(8:0)	HMDB0000791	Carnitine and fatty acid metabolsim	288.218	0.672	[M+H]+	2.83521e+06	2.18006e+06	2.14464e+06	2.63411e+06	2.93682e+06	2432593	436033	261984	439315	253354	336978	426692	1.62993e+06	1.20728e+06	4141564	945659	1922924	3.58639e+06	518226	565310	600184	851601	904638	618599	3.8431e+06	3.23054e+06	3225724	3842174	2.81336e+06	3.0087e+06	330468	317623	320397	325390	306741	303931	510947	921342	429619	391444	353703	239114	195167
213	AC(8:1)	HMDB0013324	Carnitine and fatty acid metabolsim	286.202	0.673	[M+H]+	303198	341301	293392	350967	339340	310503	243307	99836.2	89527.7	65172.3	78195.8	83204.2	269318	174221	217101	326695	267835	223413	233207	95594.9	86858.6	105990	144946	119144	658385	560205	509814	718486	376008	472697	138377	153505	158906	141096	155654	138549	196013	305493	117372	130990	51949.5	65135.6	53002.5
214	AC(8-OH)	HMDB0061634	Carnitine and fatty acid metabolsim	304.213	0.636	[M+H]+	1.06368e+06	1.25021e+06	990390	1.10869e+06	1.29431e+06	1.17372e+06	294100	182960	245072	198028	224070	233900	609592	561337	736274	440789	625863	647231	344928	432306	353307	427172	542636	400639	1.16992e+06	1.189e+06	1.26886e+06	1.34622e+06	1.19297e+06	1.33152e+06	137615	158677	117423	151447	114485	140137	211905	220303	199226	214756	202295	85370.4	84854.2
215	AC(9:0)	HMDB0013288	Carnitine and fatty acid metabolsim	302.233	0.681	[M+H]+	31440832	42128748	37438572	26687738	38029724	35771880	975520	741919	1.03966e+06	861895	799640	1.04766e+06	3214540	2.04006e+06	3277054	1.36667e+06	2.36419e+06	2.73761e+06	573196	607586	664778	531155	877895	653830	23485494	28790528	27442568	25704310	25901950	23575912	418139	652385	402394	499621	478137	335316	1.57805e+06	1.61223e+06	1.51509e+06	1.48933e+06	1.70877e+06	115973	153820
216	AC(9-OH)	HMDB0061635	Carnitine and fatty acid metabolsim	318.229	0.627	[M+H]+	450908	491152	495982	377862	410708	454327	44341	46109.6	65840.4	53501.3	46088.8	62775.3	180361	162699	186043	167782	167592	112792	53592.4	51402.2	57542	56745.4	67104.8	67661.1	294079	273943	352176	256452	275873	472505	44544.5	32108.3	44321.2	52632.2	42698.6	53011.4	291431	246792	243483	279558	300770	19177.5	31997.8
217	AC(10:0)	HMDB0000651	Carnitine and fatty acid metabolsim	316.249	0.711	[M+H]+	3.9566e+06	4272320	3.6203e+06	4.81383e+06	4600647	4.74958e+06	511951	342403	481133	336912	398937	419670	1755099	1.24017e+06	2.30265e+06	1142951	2.17262e+06	2.45048e+06	591826	594194	436467	697143	655842	612389	4.57716e+06	5295226	4.39422e+06	5.0139e+06	4.27922e+06	4.79839e+06	444696	413979	351387	422072	273326	333506	413872	1.01628e+06	521800	608876	490196	236524	189021
218	AC(10-OH)	HMDB0061636	Carnitine and fatty acid metabolsim	332.244	0.67	[M+H]+	608630	774166	506081	919081	900901	899410	124061	89226.8	166491	87079.5	91589.9	138478	277464	255450	376687	275036	272468	296672	168373	154976	173087	218319	225999	194482	1.25114e+06	1.03729e+06	1.25041e+06	1.36824e+06	1.12173e+06	1.46939e+06	110568	94243.9	90238.5	106827	93675.1	82131.5	155110	157301	135456	137342	78678.6	46603.1	21825
219	AC(10-OH3)	HMDB0061639	Carnitine and fatty acid metabolsim	374.292	0.687	[M+H]+	890300	1094837	757191	1.16441e+06	1.00468e+06	1.20067e+06	122603	99203.8	128141	131386	93019.4	140306	283453	149239	367221	193645	223381	272665	53533.7	51771.7	47694.5	51267	69550.1	53044.8	455030	370728	330506	367334	405697	534462	31553.7	31357.7	40304.1	40322.8	26399.5	12109.2	102495	115884	86483	114957	67454	10433	4771.96
220	AC(11-OH)	HMDB0061637	Carnitine and fatty acid metabolsim	346.26	0.678	[M+H]+	516557	611375	778129	579468	531042	523068	63139.1	46676.5	76943.3	58060.1	46634.8	67820.4	163443	130744	137571	118125	142562	142748	27944.6	31646.7	29157	27927.5	69626.9	21391.6	155348	112863	163363	136270	139449	144659	31558.1	13928.7	20003.8	62744.4	19090.8	13822.4	59720.7	42625.2	71664.5	56955.6	60441.6	11555.8	8252.63
221	AC(12:0)	HMDB0002250	Carnitine and fatty acid metabolsim	344.28	0.751	[M+H]+	7628892	6.08759e+06	5.93111e+06	8399184	8046140	7.61291e+06	983288	848925	1.1633e+06	616725	967177	1.33061e+06	4.88741e+06	3697304	4.13416e+06	1.97951e+06	5310017	4876890	957393	1.17852e+06	1.02992e+06	1.32007e+06	1967741	1443488	9996573	10427875	9245782	10228244	8.13014e+06	6.90605e+06	915765	1.07948e+06	784350	1.27936e+06	778280	879633	1532877	1.6402e+06	1079602	1.40307e+06	1.05611e+06	302385	350410
222	AC(12:1)	HMDB0013326	Carnitine and fatty acid metabolsim	342.265	0.712	[M+H]+	7761534	7.24351e+06	6043478	5371016	7086556	7157546	923075	888352	1336961	731213	1.06979e+06	1.47714e+06	3.0743e+06	2.14808e+06	5070297	1.91379e+06	4212376	4.35662e+06	1.17259e+06	1.47984e+06	1.24738e+06	1.6101e+06	1.90099e+06	1.44035e+06	10593676	9416889	9137899	9595929	7.42656e+06	9365600	1.15805e+06	794601	920161	1.2022e+06	925281	901434	1.89693e+06	1844815	1.43478e+06	1.36646e+06	1.49177e+06	867591	805280
223	AC(12-OH)	HMDB0061638	Carnitine and fatty acid metabolsim	360.276	0.729	[M+H]+	958682	1.10966e+06	1.08024e+06	1184546	1300860	1.34189e+06	651607	237609	428660	342109	306468	422967	761588	326522	530606	589170	558244	869682	203441	161757	495718	492645	1.44733e+06	550106	2809438	3.15486e+06	2.38669e+06	2.79771e+06	2.01926e+06	2.77707e+06	490064	450287	740663	918740	998800	398073	1.39122e+06	642446	355530	802031	497783	480107	336396
224	AC(12-DC)	HMDB0013327	Carnitine and fatty acid metabolsim	374.251	0.712	[M+H]+	198572	320457	198976	242028	130190	245979	142060	100075	126780	64604.2	141964	106455	341120	257318	315493	242586	366550	371062	63831.3	53265.8	35049	50077.9	63046.8	81350.5	232251	229826	135102	150991	237826	198782	72423.9	55644.8	73663.1	84704.8	67368.8	91364.2	191054	263648	149068	194117	143490	28706.9	14011.4
225	AC(14:0)	HMDB0005066	Carnitine and fatty acid metabolsim	372.312	0.793	[M+H]+	23565062	22195466	23379478	21326182	15986917	18708874	4.14862e+06	4.19292e+06	5.92664e+06	3660689	4.5994e+06	5268390	19954910	8991264	15121312	9475154	15135352	17888672	7.18491e+06	6.60851e+06	6280752	9362313	10742496	6611764	28915978	24171632	36722372	28938880	16579519	16964742	5.10403e+06	4.71715e+06	3.85186e+06	5.3977e+06	5727628	4588408	5.9734e+06	5.66224e+06	4510660	5.98257e+06	3205902	1.23471e+06	894403
226	AC(14:1)	HMDB0062588	Carnitine and fatty acid metabolsim	370.296	0.766	[M+H]+	7717694	6.52665e+06	6300056	7.82837e+06	7.95648e+06	6020786	1.51176e+06	927455	1.51623e+06	958303	1.38686e+06	1537930	3.66936e+06	2.31997e+06	3.53096e+06	2161327	3.58439e+06	3.21247e+06	1.16761e+06	1371938	1.09206e+06	1.21778e+06	1.63852e+06	1.19893e+06	15422184	15129239	12689309	17753072	10294751	10896015	1.65724e+06	1.69351e+06	1.11937e+06	1.93835e+06	1.43579e+06	1.54979e+06	3.27351e+06	2.57639e+06	1.85882e+06	1.80239e+06	1.65789e+06	715504	464789
227	AC(14:1-OH)	HMDB0013330	Carnitine and fatty acid metabolsim	386.29	0.753	[M+H]+	1051610	1.54446e+06	1.15886e+06	1.13461e+06	1.46619e+06	1688364	183236	190081	243152	204276	144685	151095	1.08329e+06	365424	393505	639926	382050	514015	169125	187546	169554	175572	208614	255274	3050320	3.13571e+06	3.04652e+06	2.62721e+06	2670805	3812852	230421	175340	314401	283647	175533	106247	968650	330696	732015	692221	431360	94019	84438.4
228	AC(14-OH)	HMDB0061640	Carnitine and fatty acid metabolsim	388.306	0.75	[M+H]+	828279	1.08495e+06	840289	1.21718e+06	1.29097e+06	906750	188506	187042	190398	122079	183458	208764	848920	857901	891687	473428	967422	699284	170196	248250	314772	366391	354920	314672	4.55357e+06	6.07268e+06	3626372	4.81697e+06	3.56136e+06	3.90933e+06	139806	142609	154352	178581	120538	137033	368934	305383	279456	523648	325494	76495.9	64734.1
229	AC(15-OH)	HMDB0062517	Carnitine and fatty acid metabolsim	386.327	0.805	[M+H]+	4.7356e+06	4.41634e+06	3.40913e+06	3.62006e+06	3.28186e+06	4494481	3.61555e+06	1427973	2986821	2.5445e+06	1.29655e+06	2.34306e+06	3.37538e+06	2.0889e+06	2.45169e+06	2703700	2.14389e+06	2.2987e+06	2.48381e+06	1.83523e+06	1.46963e+06	2.25778e+06	2.70854e+06	1.25941e+06	9345614	7430126	9876637	9341713	4.04489e+06	5.8244e+06	2.05287e+06	1.11657e+06	1.12239e+06	894448	687664	950090	3430945	4.97709e+06	3.82784e+06	4.19899e+06	2733988	865056	1.02942e+06
230	AC(16:0)	HMDB0000222	Carnitine and fatty acid metabolsim	400.343	0.826	[M+H]+	14133821	17323124	13276325	14063924	13320032	14949149	5.81491e+06	4889329	7545906	5.19022e+06	4517397	6927048	8476090	5479706	7.83033e+06	4413305	7.52792e+06	6222716	4.39564e+06	5.17804e+06	4.75742e+06	5.76543e+06	8469330	4.79908e+06	22610832	23501706	24354346	26756768	15434153	16818782	9076546	11458864	8827253	10818180	8565685	7394982	12422943	6.51523e+06	6190472	7.09113e+06	6.62282e+06	4.93564e+06	3.62217e+06
231	AC(16:1)	HMDB0006317	Carnitine and fatty acid metabolsim	398.327	0.802	[M+H]+	20597518	15348181	18384674	20029026	15760464	15471479	5.05117e+06	4.32763e+06	7.17137e+06	4.88142e+06	4658170	5770782	9845911	7047372	10936565	8193366	9406065	9814321	5.91132e+06	5.5416e+06	5.65437e+06	6.60819e+06	10184977	5457554	28955334	30241184	31474058	33952644	22930846	25351208	9488104	9683209	7.01255e+06	8816201	6356332	6.48524e+06	15297613	9379772	6.50517e+06	9552717	7.29545e+06	4.57671e+06	3.7589e+06
232	AC(16:2)	HMDB0013334	Carnitine and fatty acid metabolsim	396.312	0.787	[M+H]+	466552	544241	505159	462457	465223	503355	86232.1	62088.4	134815	73937.6	100483	72444.9	544285	304609	423714	285469	426184	476091	94317.3	46962.2	56112.4	129799	143456	92789.2	1.25093e+06	997658	1.25398e+06	1.05697e+06	673150	714275	167991	123526	107230	114571	160616	127292	251768	249250	195750	246551	150816	39104.5	53636.5
233	AC(16:1-OH)	HMDB0013333	Carnitine and fatty acid metabolsim	414.321	0.776	[M+H]+	750238	644214	721888	827107	822837	731337	127675	100439	220869	90700.6	155835	202406	508750	282406	567352	313031	465846	444701	164706	134220	142126	121987	223031	273308	2.22672e+06	2708273	2.36719e+06	3.263e+06	1.70809e+06	1.6959e+06	176588	334660	297863	271169	157000	575877	342035	257679	250972	323601	226006	73709.3	75446
234	AC(16-OH)	HMDB0061642	Carnitine and fatty acid metabolsim	416.337	0.793	[M+H]+	574506	626957	640932	571765	452770	617302	78187.4	73647.1	147179	93784	30042.8	121239	649060	269117	494604	333565	589986	616912	187717	123954	167666	146116	245239	140018	1861127	1.83038e+06	1.75523e+06	1.30483e+06	792849	909911	157576	167181	108274	100295	96886.2	123519	594904	265294	303763	463648	255018	199742	155564
235	AC(17:0)	HMDB0006210	Carnitine and fatty acid metabolsim	414.358	0.835	[M+H]+	2.25872e+06	2.62691e+06	1575364	1584887	1.9336e+06	2.94953e+06	1.28835e+06	639084	1.05252e+06	569962	372353	829483	1.18679e+06	625169	743849	649388	726441	596909	531038	488384	528708	746043	906005	463086	4424938	3705539	5.99812e+06	3.91142e+06	2.57541e+06	2.71812e+06	695378	345296	747786	575722	352824	447225	1.86818e+06	1.5826e+06	1.52171e+06	1.53813e+06	1.18866e+06	484135	634007
236	AC(18:0)	HMDB0000848	Carnitine and fatty acid metabolsim	428.374	0.852	[M+H]+	8824567	8869021	8.16388e+06	6.52553e+06	7.47336e+06	8.31457e+06	2.4273e+06	2.58262e+06	3.03759e+06	1.37857e+06	1976727	2.62719e+06	5.02249e+06	2.63243e+06	3.66752e+06	2.52062e+06	4736958	3419254	2.18435e+06	1.96274e+06	2448493	2.85948e+06	2.85686e+06	3.41233e+06	7161004	8977445	10052820	7154536	7.87556e+06	7424602	4.12336e+06	3.98062e+06	4.75968e+06	4.69148e+06	2.39476e+06	4.53568e+06	3.73281e+06	5394713	4.93962e+06	3.57238e+06	3.12619e+06	2.43049e+06	1.78114e+06
237	AC(18:1)	HMDB0013338	Carnitine and fatty acid metabolsim	426.357	0.831	[M+H]+	15407925	18710884	12097691	16832290	14258563	21672186	7.59463e+06	6479422	8.00288e+06	4.75895e+06	5161118	6326508	9795515	6.15944e+06	8.32508e+06	6.33975e+06	8780843	7236744	5393829	6243036	6.36471e+06	5.91148e+06	10729107	5.48803e+06	21877456	28403390	33257898	27329350	18970842	20080778	11228404	12193760	10984333	13366413	10770929	11571555	19451488	10471703	11367376	9368997	8537407	6.46244e+06	5.48849e+06
238	AC(18:2)	HMDB0006469	Carnitine and fatty acid metabolsim	424.343	0.812	[M+H]+	3.07982e+06	3.16466e+06	2055969	2.25566e+06	2.43935e+06	2.90113e+06	1.28228e+06	840279	1560975	1.30745e+06	1.08493e+06	1.53696e+06	2066790	1.36201e+06	1.85355e+06	1.48856e+06	1.61026e+06	1.5476e+06	1.87418e+06	1.92419e+06	2.01702e+06	1944218	3.53131e+06	1452750	5.03613e+06	6.11908e+06	5.82004e+06	6.90412e+06	5033337	5311796	3952099	3.20995e+06	3.31764e+06	3659337	2.5558e+06	3.0504e+06	4.01404e+06	3.39393e+06	3.32116e+06	2712190	2.47855e+06	3.22469e+06	3.10396e+06
239	AC(18:3)	HMDB0006319	Carnitine and fatty acid metabolsim	422.327	0.791	[M+H]+	1.40729e+06	1.54265e+06	894724	847056	827338	1.10272e+06	543872	414284	574286	607235	427809	623450	661510	381811	562309	545058	582412	607438	798475	936211	665927	978492	999943	726996	1.31911e+06	1.64431e+06	2.01354e+06	1754278	1.25242e+06	1.40794e+06	1.33274e+06	1296201	1.20935e+06	1.1961e+06	1.11937e+06	1.23548e+06	1.31096e+06	908086	880957	642895	492000	1.08097e+06	934280
240	AC(18:4)	HMDB0006463	Carnitine and fatty acid metabolsim	420.31	0.803	[M+H]+	0	0	0	7019.17	0	0	0	0	0	0	0	0	0	4059.91	0	0	0	0	23682.8	0	0	0	6591.33	0	4525.58	0	0	0	0	0	0	9116.49	0	0	0	0	0	0	0	0	0	0	0
241	AC(18:1-OH)	HMDB0013339	Carnitine and fatty acid metabolsim	442.351	0.805	[M+H]+	524657	548773	587029	629479	431192	488294	98941.2	67636.8	111481	51287.7	87666.8	69964.9	342258	331016	343037	299672	311790	370468	77075.8	75894.8	73126.7	79929.5	105109	77914.2	1.28871e+06	1.25625e+06	1371140	1.37229e+06	1.01227e+06	1323093	107696	92750	84053.1	83816	71015.1	82833.9	311103	198159	171112	312707	200466	314540	202173
242	AC(20:4)	HMDB0006460	Carnitine and fatty acid metabolsim	456.406	0.884	[M+H]+	5.36229e+06	5.84532e+06	5.63307e+06	4.38661e+06	5238020	6.22211e+06	760281	748964	720168	553018	722573	875454	2999647	4.104e+06	2.47346e+06	3608377	2.88841e+06	2173595	894163	1.18043e+06	1.25511e+06	1.02455e+06	1.78702e+06	868250	5.09414e+06	5.64555e+06	6.50856e+06	2.98165e+06	6.88205e+06	6.37714e+06	1.32494e+06	1.55839e+06	1.24881e+06	1.12444e+06	856277	1.09433e+06	2.87608e+06	4.05703e+06	4.3871e+06	3564636	2697485	1.64483e+06	899335
243	AC(26:0)	HMDB0006347	Carnitine and fatty acid metabolsim	540.499	0.894	[M+H]+	2143.29	1627.91	6250.46	1254.54	1303.02	2767.14	0	6360.13	20934.8	0	1920.22	8683.24	0	3399.68	1583.44	4245.44	972.67	2332.52	2360.11	3260.97	0	0	3837.67	1304.25	7102.96	2286.5	18890.2	0	2000.98	0	2358.15	3642.28	3062.28	5492.57	0	2192.04	0	0	4002.71	3624.51	0	0	2650.12
244	FA(8:0)	C06423	Saturated Fatty acids	143.107	0.602	[M-H]-	436619	258738	184191	222734	268434	346772	211755	193005	214436	231502	148585	288073	518697	111243	189186	260994	228788	278437	153447	247064	167195	182461	253476	175398	411841	366010	375611	287398	244474	224713	231547	107145	180185	197869	281705	147560	406779	321429	232461	167623	217687	287857	257376
245	FA(10:0)	C01571	Saturated Fatty acids	171.139	0.641	[M-H]-	785498	513548	305858	475008	417058	854887	770044	450792	499108	547206	470943	661816	858774	317832	379732	436942	444441	681900	448128	574534	412787	431261	539981	460236	779866	1.06179e+06	566572	596441	795523	597831	644698	533973	837353	710167	962358	594849	770053	791867	435417	676018	426688	1.07335e+06	396172
246	FA(12:0)	C02679	Saturated Fatty acids	199.17	0.67	[M-H]-	81290776	88155072	87934688	94494824	103449592	82371384	3.58869e+06	2.59156e+06	4.53759e+06	1.47449e+06	2.45869e+06	5.53168e+06	10995711	4.03505e+06	6844032	7.30413e+06	4297252	7678308	2.36502e+06	3.91465e+06	2.98674e+06	855145	2.58595e+06	1.80916e+06	38071508	44915472	37864976	39194188	91285504	83965192	2.60599e+06	5237016	9422039	4.43286e+06	5.96925e+06	4188330	9163828	4.96244e+06	2.78871e+06	11877627	3648288	11522640	1.00555e+06
247	FA(14:0)	C06424	Saturated Fatty acids	227.202	0.713	[M-H]-	44372544	43211396	44236392	39693724	54301756	45022732	2.9373e+06	2398916	3.44696e+06	3047737	3022073	2.93978e+06	6.44075e+06	4.80481e+06	5341918	5.21186e+06	4.42276e+06	5082428	3.50475e+06	3.73066e+06	4.0145e+06	3228440	2815135	4.72044e+06	18470926	27241566	20311518	18470786	38927780	32424128	2.97987e+06	3.28231e+06	2.08251e+06	2.7382e+06	2390087	2083817	56049996	2879876	2.8254e+06	3000972	2.66328e+06	1.3489e+06	1.84627e+06
248	FA(16:0)	C00249	Saturated Fatty acids	255.234	0.772	[M-H]-	57859084	44294840	42200644	43391568	44914852	41675824	24195344	27797734	29075760	26714074	28648066	27703846	34313280	29785222	27625110	26138800	24943448	21256114	29122522	31125202	26072120	24192210	26941920	32265058	66973412	67408400	87411400	54501236	65799136	58039924	44137392	38698132	40921796	44934048	45532768	41505228	109053056	46968076	59724724	39863756	59453516	42497292	52835332
249	FA(18:0)	C01530	Saturated Fatty acids	283.265	0.846	[M-H]-	32634854	32345824	21583616	23256734	24178082	25783402	23283306	21208754	28115272	21155034	19526040	22705562	28831776	25352550	28066298	25426608	21624018	21967014	22616178	23459882	24081200	22265366	21647392	22810406	46694260	40170180	47989996	35418948	38112660	30318774	32196746	22575872	26291120	33747064	26061210	33439962	42231788	29517158	43155584	28348506	36628892	30620102	34790672
250	FA(14:1)	C08322	Monounsaturated Fatty Acids	225.186	0.684	[M-H]-	91113576	104490904	98516712	96563672	130305560	116919968	320677	274717	327806	267334	393353	335750	4.77764e+06	2829644	2.37179e+06	3.66592e+06	2.55412e+06	1589416	460599	345023	363572	277926	271488	612904	58281460	87182904	61960324	76057448	132276008	122604312	1420534	1495994	1.04623e+06	1.27264e+06	769122	599403	16104372	1433396	3421857	3.08578e+06	4.80672e+06	288030	491989
251	FA(16:1)	C08362	Monounsaturated Fatty Acids	253.218	0.724	[M-H]-	40499180	29576726	33806928	30569062	38186964	26695792	2.31018e+06	1.73543e+06	3.22691e+06	1.70483e+06	2.16499e+06	2.31344e+06	10081301	5.87828e+06	5.61544e+06	5965742	6.28119e+06	6513348	2.84478e+06	2.62988e+06	3064528	2.56612e+06	3513226	3.44776e+06	21676822	28907152	30221928	17350650	39956076	32015618	6984818	9197248	4.27142e+06	4.00799e+06	4424556	3390685	283845600	9458097	12752824	6.5153e+06	7.46522e+06	4.57805e+06	6.11648e+06
252	FA(18:1)	C00712	Monounsaturated Fatty Acids	281.25	0.786	[M-H]-	126559544	106607936	98852000	98560872	115350912	97261632	3.09725e+06	3.74802e+06	5.59526e+06	3836788	3.76407e+06	3.70742e+06	18761502	11093959	11916027	13647167	8665063	10004563	5.8529e+06	6.54485e+06	4.56639e+06	5444214	7.7779e+06	5.65052e+06	54608364	94681792	95929416	54940996	101798552	97667520	12801685	11541019	10835932	10643184	9483997	7392184	275481984	15649109	25649226	14785195	16856976	9082315	16672139
253	FA(18:2)	C01595	Poly-unsaturated Fatty Acids	279.234	0.738	[M-H]-	77295504	67908136	54987540	66191324	68880392	61108672	1.55288e+06	1.4138e+06	1.86283e+06	1.18619e+06	1.52256e+06	1.76744e+06	10228547	5.42377e+06	6.5013e+06	6790956	6.19953e+06	5424670	2.85741e+06	2518097	2.10868e+06	1.43249e+06	3.50644e+06	2.48434e+06	24072120	56022832	52063788	30859624	64811552	55989468	8598636	6323802	5.86531e+06	4989664	4725370	3.93144e+06	240987152	8996237	13747489	9623187	9978939	4.85399e+06	8.33497e+06
254	FA(18:3)	C06427	Poly-unsaturated Fatty Acids	277.218	0.708	[M-H]-	48453716	36771488	36374824	43743960	36911876	34709556	804834	764320	1.08868e+06	790216	853816	876522	10748115	7.39583e+06	8151184	8019502	5891860	7.52467e+06	2.83984e+06	2.89136e+06	1.63253e+06	1.28278e+06	2860460	1528678	12223737	22635480	21221226	15211036	34777484	22714710	3623658	2789121	1.94107e+06	2.07636e+06	1.95695e+06	1683536	87394520	6933032	12536957	7.79986e+06	8468725	5.03735e+06	5.14537e+06
255	FA(20:3)	C03242	Poly-unsaturated Fatty Acids	305.249	0.751	[M-H]-	2.52139e+06	1.7138e+06	1.74077e+06	1.34783e+06	1.80333e+06	1.58556e+06	0	0	0	0	0	0	421685	246410	280508	299842	156599	196498	218576	112632	39847.8	29241	62067.3	21125.6	429715	911428	880846	748657	2.20242e+06	1.62295e+06	88076.8	19417.7	40169.3	0	0	21575.6	475703	315483	582256	496963	535311	469459	366908
256	FA(20:4)	C00219	Poly-unsaturated Fatty Acids	303.233	0.754	[M-H]-	0	0	0	20460.3	0	0	0	0	0	0	0	0	0	0	0	0	0	0	21328.2	0	0	0	0	0	0	0	111021	0	0	0	0	0	0	0	0	0	0	20977.1	0	0	0	0	0
257	FA(20:5)	C06428	Poly-unsaturated Fatty Acids	301.219	0.692	[M-H]-	228177	258953	75820.2	117172	133525	177445	0	0	23397.9	31784.7	0	19844.5	75154.9	27697.4	15583.5	0	0	0	10812	12454.6	0	0	16495.5	0	59518.7	76547	53695.9	40003.5	123535	125006	17308.8	0	4699.64	0	0	14129.5	0	46009	21471.4	0	0	36590.1	41874.8
258	FA(22:6)	C06429	Essential fatty acids	327.23	0.619	[M-H]-	436459	450878	428336	438415	703391	430669	37361.7	16331.3	40906.1	13485.4	50418.4	0	1.05553e+06	1.07832e+06	482355	1.21252e+06	460072	544473	16994.9	17408.1	6214.72	16450.4	13794.4	4535.37	147099	139327	136091	109758	257401	356190	18710.9	6135.74	10207.2	43441.8	6956.01	16912.5	124677	152170	100156	159324	131996	0	0
259	HODE	C14762	Arachidonate metabolism	295.229	0.658	[M-H]-	847128	423163	816535	450688	655978	561718	152427	87585.8	176725	99732	97140.1	165082	619822	309854	434936	408268	493207	482525	255918	271760	150887	159567	243577	205060	1.24369e+06	1.41607e+06	832971	501380	1.31947e+06	1.06184e+06	733479	271844	348121	405031	288033	284187	2.27354e+06	458962	1386949	872893	789452	986285	946263
260	HPETE/Leukotriene B4	C14820	Arachidonate metabolism	335.222	0.673	[M-H]-	98223.4	66544.2	106991	142346	35786.1	0	0	4605.75	0	9369.19	13108.2	0	65042.1	0	0	0	0	0	0	0	4698.67	0	0	5341.34	0	45363.4	46126.3	57178.7	64638.1	216490	14240.8	3118.27	0	3851.34	0	0	624385	0	0	0	0	4977.48	3535.61
261	Mevalonate	C00418	Cholesterol Biosynthesis	147.065	0.258	[M-H]-	1.6043e+06	1.24071e+06	1.53324e+06	1.45062e+06	1.21288e+06	1.22215e+06	3.79342e+06	2.53162e+06	4.51118e+06	3.32705e+06	3.62381e+06	3.64438e+06	4155026	2.21416e+06	2.70022e+06	1990586	2.7283e+06	3.31902e+06	6.17695e+06	4931442	5.48051e+06	5.54906e+06	8869178	4423842	2.46921e+06	2.53963e+06	1750943	1.74663e+06	1.57008e+06	1307575	9226153	16561648	9351139	15281537	13744252	15417155	10364220	8862336	11882872	9155691	11741132	15128697	12115563
262	Mevalonate-P	C01107	Cholesterol Biosynthesis	227.032	0.223	[M-H]-	6119.54	4480.34	5848.56	2724.18	4632.28	7682.5	74774.1	30910.8	61748.3	42821.8	36015.9	64268	15876.2	5445.82	16444.8	11616.7	8953.38	17219.3	71967.9	95679.6	58041.7	114430	125266	70924.2	9722.53	7778.14	17154.8	5978.11	6680.21	7160.12	120077	108211	147592	44444.6	169443	109706	76521.1	30704.9	39529.6	46521.7	45646.9	135710	115074
263	Sphingosine 1-phosphate	C06124	Sphingolipid biosynthesis	380.251	0.669	[M+H]+	226586	319263	266727	295244	295903	364104	42784	22840.2	29980.8	33791.8	31359.4	29947.5	158621	111756	82603.5	53392.4	109200	97746.6	6425.53	12124.9	0	0	0	7107.22	338720	326301	381580	333355	301205	367757	21772.9	20058.6	20164.8	14397.8	10898	0	99592.7	105849	95279.1	156027	98901.1	0	0
264	Biliverdin	C00500	Heme metabolism	583.251	0.727	[M+H]+	1.03492e+06	1.47018e+06	1.33412e+06	1.08814e+06	1840115	1.9746e+06	229530	295652	191342	130348	257360	194811	1.18017e+06	683173	1.17756e+06	486736	1.11676e+06	875796	529246	518885	617030	426186	768892	339520	525589	672891	563717	789134	1.11545e+06	759469	232023	137714	180508	215599	324876	254780	518418	490410	975299	839088	1.00785e+06	1.24111e+06	1.11743e+06
265	S-lactoylglutathione	C03451	Tentative Amino acids assignments	380.111	0.251	[M+H]+	0	15025.7	0	0	0	0	0	0	0	0	0	0	13866.1	0	0	0	0	0	0	0	0	0	0	0	0	0	10636.3	30785.6	10094.8	0	0	0	0	0	0	0	16433.7	12503.3	0	0	11458.5	0	0
266	N6-Methyl-L-lysine	C02728	Tentative Amino acids assignments	161.127	0.17	[M+H]+	783998	830122	825334	572174	829401	725386	59766.6	33323.8	128553	68394.9	45727	84360.7	833150	929786	971720	880688	911991	1.14507e+06	213670	159259	283212	209032	341189	229649	870899	887484	589049	663342	672279	735915	36397.9	122879	121267	53842.4	118123	50035.2	376199	480372	559541	448623	447675	347290	360061
267	Riboflavin	C00255	Stimulating/Exogenous compounds	377.144	0.598	[M+H]+	385923	763110	647293	1207162	1.23332e+06	1.16558e+06	76707.5	63073	92787.1	73464.7	113236	111790	98781.3	76365.4	72206.1	67599.6	110539	133598	52639.3	55814.1	44900	53025.9	67127.6	45218.1	5071232	4259758	5.07559e+06	5214134	3.30964e+06	3.53624e+06	3.83026e+06	3729726	3.65854e+06	3175370	2.92108e+06	3.10851e+06	2.75943e+06	2.47154e+06	3.92109e+06	4.04941e+06	3.27065e+06	2.21337e+06	2425257
268	Biotin	C00120	Other	245.094	0.602	[M+H]+	1.71365e+06	1706927	1496266	1.93887e+06	1803378	1.74085e+06	396784	362699	451313	283080	448167	332277	951112	901394	927905	615849	1.13043e+06	1.0517e+06	488327	521262	495248	554790	730258	493028	1640996	1.97219e+06	2.19633e+06	1.90416e+06	2.23412e+06	2.36376e+06	215988	258235	209563	241180	224133	242088	656302	752769	706844	892621	730763	564643	495551
269	Acetyl phosphate	C00227	Other	138.979	0.235	[M-H]-	83873.1	70648.1	68747.1	85416.6	143748	87308.2	32977.3	36774.8	44518	34912.7	39867.1	52098.4	153391	76635.8	155860	108463	144523	145397	62827.6	89617.9	29078.7	66965.9	88587.3	49297.3	135138	114452	49169.8	68792.7	141308	156431	46285.1	50919.6	34017.7	67439.9	39913.5	42565.6	179943	138591	180666	122901	105437	73420.3	69964.8
270	N5-Methyl-L-glutamine	C03153	Other	159.078	0.259	[M-H]-	210426	152785	167736	145318	171355	161619	10292.5	16524	17860.5	46211.5	26962.1	10931.7	286521	152790	194368	151139	281330	351522	90774.4	76472.8	138284	107136	80406.7	115806	725532	464114	351660	438572	168827	150480	60786.6	48095.9	48955.3	26443	25851.2	25632.7	637481	382985	579618	446752	602892	207508	305371
271	2-Methyleneglutarate	C02930	Other	143.033	0.252	[M-H]-	233181	180483	176863	208754	188867	146017	104798	103966	122743	94634	75560.3	102481	1.5249e+06	1.09363e+06	1.11175e+06	594503	1.90168e+06	2.01978e+06	535453	555080	909106	673567	603234	451783	280998	272069	184672	199315	195630	190141	172596	189786	169334	177382	191069	139580	1.1737e+06	1457292	1.06333e+06	1.07124e+06	1.05189e+06	1.11878e+06	1.0028e+06
272	6-Pyruvoyltetrahydropterin	C03684	Other	236.078	0.25	[M-H]-	6690134	5615064	4.88418e+06	6727332	6.53889e+06	6.92463e+06	7.75538e+06	5.76705e+06	8391290	6.04358e+06	6752496	7239912	7230134	5669548	7.69109e+06	5.42783e+06	7.06343e+06	6414056	7.05816e+06	8.25123e+06	7.80912e+06	8674817	10538716	5.74599e+06	2967474	2543404	2.2446e+06	2.56989e+06	2389798	2.92688e+06	3261704	3074026	3.2245e+06	3.77821e+06	3400130	2.97283e+06	3.00761e+06	2.66697e+06	2.73531e+06	2.34645e+06	2.5799e+06	3444845	3267156
273	6-Lactoyl-5-6-7-8-tetrahydropterin	C04244	Other	238.094	0.258	[M-H]-	33568	57112.4	35205.6	79512	124423	79565.1	144369	49512.9	121765	111313	101353	80167	99433.1	94591.8	104470	71059.5	103069	82993.2	94079.3	86122.4	86884.8	109335	65683.2	95870.7	29779.6	104897	67307.1	25464.6	26370.1	27128.8	95303.9	162011	53083.2	72040.1	57554.1	83498.4	48456.1	71535.8	25836.5	16892	26888.8	116547	33146.7
274	D-glucono-1,5-lactone	C00198	Other	177.039	0.252	[M-H]-	420606	342745	457685	352531	327116	258001	114608	49079.7	105040	45561	88066.5	54291.2	948268	551370	557531	283073	1.13333e+06	780241	550514	802994	355406	216571	597633	820316	286423	232000	214555	254108	166611	259861	157677	135953	176890	117992	110310	118886	630413	354213	798225	459309	785570	623904	538866
275	Dihydroflavonol	C15570	Other	241.086	0.147	[M+H]+	5527.56	6734.46	5875.62	5569.69	7486.76	4876.44	0	4391.81	9651.16	7876.96	25104.9	31659.6	12512.5	5975.68	0	51156.3	4322.01	55118.4	11561.8	4926.32	0	10339.2	11011.1	31773.8	0	0	6172.01	0	9955.01	5712.97	3716.7	83013.2	7408.61	11860.2	13144.6	20089.8	0	6172.5	0	9302.68	8025.83	4298.88	8263.76
276	D-Ribitol 5-phosphate	C01068	Other	231.027	0.229	[M-H]-	64709.1	91034.8	112457	72270.4	77901.2	66243.9	0	0	0	10343.1	0	4583	16921.9	20061.7	22913.9	28913.2	33622.6	34795.2	0	0	12090.9	0	7118.2	0	236965	255186	204706	232564	439557	482856	154454	105175	126876	99895.7	118399	117330	87799.2	107862	223561	72001.2	87460	43181.2	61194.4
277	D-Ribose 5-diphosphate	C01095	Other	308.976	0.273	[M-H]-	12644.7	33795.2	18677.8	26204.4	23513.6	32772.9	19103	21097.9	19109.8	22436	7413.42	14678	23632.1	11598.2	29279.3	32847.9	25968	36734.7	11341.1	18691.8	16316.6	32252.7	40562.8	24310.9	46254.3	57473.2	36422.9	39082.1	10884.2	64511.4	43759.3	22438.5	9463.97	16269.2	36375.3	13439.2	33677.1	3820.53	22514.2	2577.86	23343.5	22431	8280.26
278	N-Acetylmethionine	C02712	Proteolysis	190.055	0.278	[M-H]-	30260.5	69020.8	29091	29017.8	21481.1	24346.3	1136.95	0	19434.4	1401.81	1328.67	0	143916	37932.1	31737.1	41708.1	36149.2	68044.1	2377.04	4789.59	11254.8	22873.7	2279.27	7012.86	0	28525.7	63586.9	61871.7	9560.43	60535.7	15040.1	141288	18408.6	60474.2	47940.2	44879	31465.8	17589.1	42719.2	15028.1	29498.8	51957.6	35101.7
279	N-Acetyl-D-phenylalanine	C05620	Proteolysis	206.08	0.538	[M-H]-	93842.5	76259.8	69774.7	80249.5	68209.9	85886.6	38444.5	38982.7	35959	33116.3	25302.6	48418.7	134030	63885.9	97127.5	77955.2	89038.1	103627	59107.4	68747.2	59194.6	60064.5	56723.2	56947.9	131510	111872	107140	110301	124959	128275	60161.8	39734.7	50111.9	41218.6	49081.1	39729.6	198211	123446	168580	150883	157491	137267	147813
280	N-Acetyl-L-aspartate	C01042	Proteolysis	176.055	0.252	[M+H]+	1.28781e+06	1424262	1.25179e+06	1.45747e+06	1.46756e+06	1.52029e+06	1576859	1604163	1.70513e+06	1.39662e+06	1.78609e+06	1.46858e+06	1.59867e+06	1.78971e+06	1584103	1.42059e+06	1.51692e+06	1592590	1.59173e+06	1544701	1.60004e+06	1.68991e+06	1941840	1548740	1.8165e+06	1548207	1.83986e+06	1.70641e+06	1.58818e+06	1.42897e+06	1.99605e+06	2.19247e+06	2.00427e+06	2.21827e+06	2.14697e+06	2.45342e+06	1.8679e+06	2.16412e+06	2.27217e+06	2.44358e+06	1.86654e+06	2.12472e+06	1775146
281	N-Acetyl-L-glutamate	C00624	Proteolysis	188.055	0.247	[M-H]-	2347937	2.10792e+06	2.04455e+06	2.33896e+06	2.25569e+06	2464679	1.9738e+06	1.50445e+06	1.96989e+06	1.48408e+06	1635791	1.4223e+06	3.47987e+06	2.31416e+06	3.06419e+06	1.79635e+06	2.94626e+06	2.77765e+06	2.95417e+06	3072830	2.64511e+06	3379452	4082608	2.34174e+06	2.71444e+06	2235005	2501943	2279527	2132940	2782945	2.11904e+06	1944402	1.986e+06	2.75529e+06	1963000	2059025	3533004	3369062	4140424	3.81684e+06	3.437e+06	3.36133e+06	2.90244e+06
282	N-Acetyl-L-histidine	C02997	Proteolysis	198.088	0.176	[M+H]+	2398730	2.55905e+06	1.98209e+06	2.99077e+06	2.27238e+06	2.09339e+06	1.35765e+06	1.0122e+06	1.11359e+06	1.19015e+06	1146843	988590	3091564	2.18586e+06	2.59519e+06	1813909	2.51669e+06	2.31213e+06	1.38117e+06	1.33397e+06	1.1283e+06	1.47567e+06	1.95561e+06	1.06835e+06	3656848	2883041	3876368	4.14124e+06	3132997	2.89769e+06	2.80419e+06	2.49758e+06	2.50481e+06	2342051	1.88576e+06	2.16504e+06	3.45367e+06	3662888	4.08961e+06	4054286	4525668	2830377	2.89963e+06
283	10-Hydroxydecanoic acid	C02774	Other	187.133	0.588	[M-H]-	1.70751e+06	1.2001e+06	1.03879e+06	871164	678599	1.11625e+06	3.11143e+06	4.64963e+06	5.85084e+06	2.24033e+06	2.8298e+06	4.22845e+06	1.97353e+06	1.03318e+06	1.38255e+06	727458	1.65483e+06	1323515	1.27784e+06	1.06592e+06	1.01985e+06	1.32856e+06	2807394	3036934	12604788	5301214	3.8857e+06	5.14042e+06	4.25882e+06	4.00364e+06	5090084	4.24937e+06	2.8878e+06	8.00523e+06	4.50454e+06	3201024	5.36898e+06	3982361	4.18735e+06	6.58096e+06	4949876	1.40611e+06	1444922
284	trans-Homoaconitate	C16579	Other	187.024	0.244	[M-H]-	97535	74794.1	105978	40509	41443.8	107139	15750.2	69071.6	66461.8	50523.3	39066.8	46499.9	199100	46015.8	206971	169541	148145	192408	105836	144517	115430	139083	212854	99746.7	293202	168234	197215	127552	177733	138597	90493.9	120727	113430	107298	134602	89178	235269	248143	267158	255049	350944	371360	490816
285	N-Carbamyl-L-glutamate	C05829	Other	189.052	0.236	[M-H]-	148292	101911	29836.1	72228.9	84497	55637	0	0	0	1404.34	0	7722.79	26633.1	52749.8	31842.9	62142.1	57199.9	34293.7	0	9490.39	9071.45	0	5068.79	0	64120.3	122063	84017.9	163518	109908	67276.8	34161	794.03	39846.6	5597.6	13503.8	22683.2	133971	50604.3	90588.8	74048.3	128481	58222.2	18371.7
286	L-Homocitrulline	C02427	Other	190.118	0.181	[M+H]+	129678	146413	51491.6	89644.9	122976	146844	32607.9	47485.2	0	0	0	26166.3	252921	211149	307859	266582	276145	249589	59589.3	67916.4	50479.6	58336.4	13672.1	66257.3	405820	309051	335037	294277	272217	270570	67394.4	114195	49378.8	64868.8	44866.6	36299.2	255630	422808	405630	318956	470277	150290	156492
287	Homomethionine	C17213	Other	164.073	0.256	[M+H]+	54609.2	30876.5	29668.6	59377.3	24147.4	55949.5	0	0	0	0	0	0	29177.8	13714.1	27828.5	9485.22	13948.4	27927.8	0	0	8905.27	0	9452.37	14641.4	57088.1	70185.4	131673	158436	37473.2	124834	14397.2	0	8510.87	18778.8	8600.39	8133.33	104097	57183.6	281745	222848	141273	28584.3	34910.6
288	Oxaloglutarate	C05533	Other	203.021	0.253	[M-H]-	615470	493055	480400	646760	663081	675180	335213	245290	411752	342152	287730	302129	618559	681216	889842	590711	783062	910860	340062	307683	314640	257812	325489	289671	738900	565979	535724	466456	476785	548262	439916	500796	371846	500325	368489	359339	519269	530711	640271	632291	641650	262525	218928
289	(R)-5-Phosphomevalonate	C01107	Other	227.032	0.223	[M-H]-	6119.54	4480.34	5848.56	2724.18	4632.28	7682.5	74774.1	30910.8	61748.3	42821.8	36015.9	64268	15876.2	5445.82	16444.8	11616.7	8953.38	17219.3	71967.9	95679.6	58041.7	114430	125266	70924.2	9722.53	7778.14	17154.8	5978.11	6680.21	7160.12	120077	108211	147592	44444.6	169443	109706	76521.1	30704.9	39529.6	46521.7	45646.9	135710	115074
290	N6-N6-N6-Trimethyl-L-lysine	C03793	Other	189.158	0.162	[M+H]+	6.79011e+06	8661271	7.19504e+06	5137138	6.92896e+06	6318080	496644	544608	437755	566173	377765	541855	4619852	3553652	3.71752e+06	3.86609e+06	4567438	3936763	1.70288e+06	1.9956e+06	2.17685e+06	2.16592e+06	2.22851e+06	1.96066e+06	10840222	13121361	10968216	9785367	12156787	10139301	1.82473e+06	1.21609e+06	1.67999e+06	1415935	1.46301e+06	1.11661e+06	6.20077e+06	5.85409e+06	8558053	6270670	6.87101e+06	9888966	9104412
291	N-Acetylputrescine	C02714	Other	131.117	0.18	[M+H]+	740398	564018	780334	521278	649761	459546	31041	39624.3	0	9466.29	36386.7	9389.95	142226	192526	55362.8	45252.3	58705.8	29399.8	18303.2	18805.9	56427.8	61240.4	26592.2	30833.2	1320384	1.22173e+06	903722	1135432	872816	727968	136412	53231.9	158391	66443	188767	31464.3	189867	197352	217193	153783	105030	271381	363867
292	(R)-(Homo)3-citrate	C16598	Other	233.066	0.29	[M-H]-	3911.31	7719.02	18866.4	9481.39	9411.07	14408.4	10167.2	23946.9	6844.01	11830.5	4714.91	7784.47	8060.76	7047.55	6131.23	21982	8039.24	5263.98	9327.94	7827.5	42768.5	5512.35	37338	23025.8	10172.1	6670.43	11046.3	7565.13	8056.5	11253.3	11084.2	8156.38	3826.2	9944.65	8046.91	4197.28	37753.8	8975.83	8683.73	11862.9	29127.1	60776.6	41685.2
293	N-Methyl-Histidine	C01152	Other	168.078	0.255	[M-H]-	686288	840841	564928	698540	602954	820554	274102	192695	300364	249159	164582	269302	983636	637173	888498	692501	1.00445e+06	1.07088e+06	488128	530877	521108	487841	696541	512438	600374	759622	613686	642957	628094	729521	351666	275060	339608	371622	326518	287292	671372	546781	774822	515356	745000	416948	519337
294	methylglyoxal	C00546	Other	71.012	0.25	[M-H]-	2.68654e+06	2824466	2.84654e+06	2.5558e+06	2.99278e+06	3127747	1.27134e+06	1.27624e+06	1.21588e+06	987850	985346	1.10211e+06	4.43117e+06	3.35911e+06	3.48157e+06	2.28906e+06	4488366	4573231	2.39739e+06	2.79823e+06	2857042	2744622	3268504	2.13811e+06	2.33599e+06	2.21623e+06	2.03113e+06	1.96269e+06	2.4533e+06	2.46198e+06	1.32721e+06	1.25503e+06	1.16221e+06	1.40715e+06	1.34731e+06	1.3394e+06	3549931	3509553	3451186	2.67138e+06	3.26421e+06	3.30945e+06	2.9932e+06
[truncated: 46 more columns]
