# Supplementary material for: Auxin exposure disrupts feeding behavior and fatty acid metabolism in adult Drosophila
Source: eLife. 2024 Jan 19;12:RP91953. doi: 10.7554/eLife.91953 (PMC10945601; doi:10.7554/eLife.91953)
Supplement: Figure 2—source data 2. [file elife-91953-fig2-data2.xlsx]

## Sheet: N1_TAG
Free Glycerol Standards				Auxin Samples (Free Glycerol)
TAG Standard (mg/ml)	OD[540 nm]	Adjusted OD[540 nm]		Sample	OD[540 nm]	Adjusted OD[540 nm]	Concentration (mg/ml)
0	0.063	0		0 mM, OreR, male	0.086	0.023	0.0452934
0.125	0.13	0.067		10 mM, OreR, male	0.092	0.029	0.0571091
0.25	0.195	0.132		0 mM, OreR, female	0.103	0.04	0.0787712
0.5	0.321	0.258		10 mM, OreR, female	0.098	0.035	0.0689248
1	0.567	0.504		0 mM, VK00040, male	0.081	0.018	0.035447
				10 mM, VK00040, male	0.076	0.013	0.0256006
				0 mM, VK00040, female	0.076	0.013	0.0256006
				10 mM, VK00040, female	0.086	0.023	0.0452934
				0 mM, AGES, male	0.081	0.018	0.035447
				10 mM, AGES, male	0.094	0.031	0.0610477
				0 mM, AGES, female	0.092	0.029	0.0571091
				10 mM, AGES, female	0.083	0.02	0.0393856
Triacylglycerol Standards				Auxin Samples (Triacylglycerol)
TAG Standard (mg/ml)	OD[540 nm]	Adjusted OD[540 nm]		Sample	OD[540 nm]	Adjusted OD[540 nm]	Concentration (mg/ml)
0	0.059	0		0 mM, OreR, male	0.362	0.303	0.598459
0.125	0.13	0.071		10 mM, OreR, male	0.134	0.075	0.148134
0.25	0.197	0.138		0 mM, OreR, female	0.705	0.646	1.27592
0.5	0.323	0.264		10 mM, OreR, female	0.317	0.258	0.509579
1	0.556	0.497		0 mM, VK00040, male	0.407	0.348	0.68734
				10 mM, VK00040, male	0.134	0.075	0.148134
				0 mM, VK00040, female	0.608	0.549	1.08434
				10 mM, VK00040, female	0.254	0.195	0.385147
				0 mM, AGES, male	0.516	0.457	0.902627
				10 mM, AGES, male	0.225	0.166	0.327869
				0 mM, AGES, female	0.838	0.779	1.53861
				10 mM, AGES, female	0.52	0.461	0.910527

## Sheet: N1_Protein
BCA Standards				Auxin Samples (Protein)
Concentration (mg/ml)	OD[560 nm]	Adjusted OD[560 nm]		Sample	OD[560 nm]	Adjusted OD[560 nm]	Concentration (mg/ml)	Dilution Factor	Adjusted Concentration (mg/ml)
0	0.096	0		0 mM, OreR, male	0.67	0.574	0.466174	10	4.66174
0.025	0.163	0.067		10 mM, OreR, male	0.612	0.516	0.419069	10	4.19069
0.125	0.316	0.22		0 mM, OreR, female	0.819	0.723	0.587184	10	5.87184
0.25	0.512	0.416		10 mM, OreR, female	0.873	0.777	0.63104	10	6.3104
0.5	0.86	0.764		0 mM, VK00040, male	0.6	0.504	0.409323	10	4.09323
0.75	1.145	1.049		10 mM, VK00040, male	0.55	0.454	0.368716	10	3.68716
1	1.398	1.302		0 mM, VK00040, female	0.933	0.837	0.679769	10	6.79769
1.5	1.924	1.828		10 mM, VK00040, female	0.804	0.708	0.575002	10	5.75002
2	2.435	2.339		0 mM, AGES, male	0.597	0.501	0.406887	10	4.06887
				10 mM, AGES, male	0.603	0.507	0.41176	10	4.1176
				0 mM, AGES, female	0.848	0.752	0.610737	10	6.10737
				10 mM, AGES, female	0.842	0.746	0.605864	10	6.05864

## Sheet: N1 Analysis
Sample	Free Glycerol (mg/ml)	Triacylglycerol (mg/ml)	Adjusted TAG (mg/ml)	Protein (mg/ml)	Normalized TAG (mg/ml)
0 mM, OreR, male	0.0452934	0.598459	0.553166	4.66174	0.118661
10 mM, OreR, male	0.0571091	0.148134	0.0910244	4.19069	0.0217206
0 mM, OreR, female	0.0787712	1.27592	1.19715	5.87184	0.20388
10 mM, OreR, female	0.0689248	0.509579	0.440655	6.3104	0.0698298
0 mM, VK00040, male	0.035447	0.68734	0.651892	4.09323	0.159261
10 mM, VK00040, male	0.0256006	0.148134	0.122533	3.68716	0.0332323
0 mM, VK00040, female	0.0256006	1.08434	1.05874	6.79769	0.155749
10 mM, VK00040, female	0.0452934	0.385147	0.339854	5.75002	0.0591048
0 mM, AID, male	0.035447	0.902627	0.86718	4.06887	0.213125
10 mM, AID, male	0.0610477	0.327869	0.266821	4.1176	0.0648002
0 mM, AID, female	0.0571091	1.53861	1.4815	6.10737	0.242577
10 mM, AID, female	0.0393856	0.910527	0.871142	6.05864	0.143785

## Sheet: N2_TAG
Free Glycerol Standards				Auxin Samples (Free Glycerol)
TAG Standard (mg/ml)	OD[540 nm]	Adjusted OD[540 nm]		Sample	OD[540 nm]	Adjusted OD[540 nm]	Concentration (mg/ml)
0	0.059	0		0 mM, OreR, male	0.083	0.024	0.0506543
0.125	0.129	0.07		10 mM, OreR, male	0.078	0.019	0.0401013
0.25	0.195	0.136		0 mM, OreR, female	0.098	0.039	0.0823132
0.5	0.324	0.265		10 mM, OreR, female	0.094	0.035	0.0738708
1	0.576	0.517		0 mM, VK00040, male	0.08	0.021	0.0443225
2	0.975	0.916		10 mM, VK00040, male	0.083	0.024	0.0506543
				0 mM, VK00040, female	0.076	0.017	0.0358801
				10 mM, VK00040, female	0.085	0.026	0.0548755
				0 mM, AGES, male	0.09	0.031	0.0654285
				10 mM, AGES, male	0.091	0.032	0.067539
				0 mM, AGES, female	0.096	0.037	0.078092
				10 mM, AGES, female	0.096	0.037	0.078092
Triacyclglycerol Standards				Auxin Samples (Triacylglycerol)
TAG Standard (mg/ml)	OD[540 nm]	Adjusted OD[540 nm]		Sample	OD[540 nm]	Adjusted OD[540 nm]	Concentration (mg/ml)
0	0.06	0		0 mM, OreR, male	0.333	0.273	0.563817
0.125	0.128	0.068		10 mM, OreR, male	0.144	0.084	0.173482
0.25	0.198	0.138		0 mM, OreR, female	0.684	0.624	1.28872
0.5	0.326	0.266		10 mM, OreR, female	0.285	0.225	0.464684
1	0.556	0.496		0 mM, VK00040, male	0.337	0.277	0.572078
2	1.014	0.954		10 mM, VK00040, male	0.216	0.156	0.322181
				0 mM, VK00040, female	0.779	0.719	1.48492
				10 mM, VK00040, female	0.249	0.189	0.390335
				0 mM, AGES, male	0.462	0.402	0.830235
				10 mM, AGES, male	0.297	0.237	0.489467
				0 mM, AGES, female	0.854	0.794	1.63982
				10 mM, AGES, female	0.459	0.399	0.82404

## Sheet: N2_Protein
BCA Standards				Auxin Samples (Protein)
Concentration (mg/ml)	OD[560 nm]	Adjusted OD[560 nm]		Sample	OD[560 nm]	Adjusted OD[560 nm]	Concentration (mg/ml)	Dilution Factor	Adjusted Concentration (mg/ml)
0	0.084	0		0 mM, OreR, male	0.633	0.549	0.411328	10	4.11328
0.025	0.144	0.06		10 mM, OreR, male	0.603	0.519	0.388851	10	3.88851
0.125	0.34	0.256		0 mM, OreR, female	0.653	0.569	0.426313	10	4.26313
0.25	0.55	0.466		10 mM, OreR, female	0.798	0.714	0.534952	10	5.34952
0.5	0.905	0.821		0 mM, VK00040, male	0.602	0.518	0.388102	10	3.88102
0.75	1.215	1.131		10 mM, VK00040, male	0.591	0.507	0.379861	10	3.79861
1	1.523	1.439		0 mM, VK00040, female	0.96	0.876	0.656327	10	6.56327
1.5	2.075	1.991		10 mM, VK00040, female	0.746	0.662	0.495992	10	4.95992
2	2.6	2.516		0 mM, AGES, male	0.649	0.565	0.423316	10	4.23316
				10 mM, AGES, male	0.702	0.618	0.463025	10	4.63025
				0 mM, AGES, female	1.067	0.983	0.736495	10	7.36495
				10 mM, AGES, female	0.956	0.872	0.65333	10	6.5333

## Sheet: N2_Analysis
Sample	Free Glycerol (mg/ml)	Triacylglycerol (mg/ml)	Adjusted TAG (mg/ml)	Protein (mg/ml)	Normalized TAG (mg/ml)
0 mM, OreR, male	0.0506543	0.563817	0.513162	4.11328	0.124757
10 mM, OreR, male	0.0401013	0.173482	0.133381	3.88851	0.0343012
0 mM, OreR, female	0.0823132	1.28872	1.20641	4.26313	0.282987
10 mM, OreR, female	0.0738708	0.464684	0.390813	5.34952	0.0730558
0 mM, VK00040, male	0.0443225	0.572078	0.527755	3.88102	0.135984
10 mM, VK00040, male	0.0506543	0.322181	0.271527	3.79861	0.0714806
0 mM, VK00040, female	0.0358801	1.48492	1.44904	6.56327	0.220781
10 mM, VK00040, female	0.0548755	0.390335	0.335459	4.95992	0.067634
0 mM, AGES, male	0.0654285	0.830235	0.764807	4.23316	0.18067
10 mM, AGES, male	0.067539	0.489467	0.421928	4.63025	0.0911242
0 mM, AGES, female	0.078092	1.63982	1.56173	7.36495	0.212048
10 mM, AGES, female	0.078092	0.82404	0.745948	6.5333	0.114176

## Sheet: N3_TAG
Free Glycerol Standards				Auxin Samples (Free Glycerol)
TAG Standard (mg/ml)	OD[540 nm]	Adjusted OD[540 nm]		Sample	OD[540 nm]	Adjusted OD[540 nm]	Concentration (mg/ml)
0	0.063	0		0 mM, OreR, male	0.078	0.015	0.0317999
0.125	0.128	0.065		10 mM, OreR, male	0.082	0.019	0.0402798
0.25	0.19	0.127		0 mM, OreR, female	0.086	0.023	0.0487598
0.5	0.328	0.265		10 mM, OreR, female	0.088	0.025	0.0529998
1	0.57	0.507		0 mM, VK00040, male	0.076	0.013	0.0275599
2	0.98	0.917		10 mM, VK00040, male	0.073	0.01	0.0211999
				0 mM, VK00040, female	0.076	0.013	0.0275599
				10 mM, VK00040, female	0.078	0.015	0.0317999
				0 mM, AID, male	0.081	0.018	0.0381598
				10 mM, AID, male	0.082	0.019	0.0402798
				0 mM, AID, female	0.081	0.018	0.0381598
				10 mM, AID, female	0.079	0.016	0.0339199
Triacyclglycerol Standards				Auxin Samples (Triacylglycerol)
TAG Standard (mg/ml)	OD[540 nm]	Adjusted OD[540 nm]		Sample	OD[540 nm]	Adjusted OD[540 nm]	Concentration (mg/ml)
0	0.067	0		0 mM, OreR, male	0.383	0.316	0.65902
0.125	0.129	0.062		10 mM, OreR, male	0.173	0.106	0.221064
0.25	0.196	0.129		0 mM, OreR, female	0.812	0.745	1.5537
0.5	0.317	0.25		10 mM, OreR, female	0.358	0.291	0.606882
1	0.587	0.52		0 mM, VK00040, male	0.445	0.378	0.788321
2	1.002	0.935		10 mM, VK00040, male	0.185	0.118	0.24609
				0 mM, VK00040, female	0.621	0.554	1.15537
				10 mM, VK00040, female	0.286	0.219	0.456726
				0 mM, AID, male	0.494	0.427	0.890511
				10 mM, AID, male	0.224	0.157	0.327424
				0 mM, AID, female	0.7	0.633	1.32013
				10 mM, AID, female	0.364	0.297	0.619395

## Sheet: N3_Protein
BCA Standards				Auxin Samples (Protein)
Concentration (mg/ml)	OD[560 nm]	Adjusted OD[560 nm]		Sample	OD[560 nm]	Adjusted OD[560 nm]	Concentration (mg/ml)	Dilution Factor	Adjusted Concentration (mg/ml)
0	0.084	0		0 mM, OreR, male	0.717	0.633	0.478458	10	4.78458
0.025	0.148	0.064		10 mM, OreR, male	0.496	0.412	0.311413	10	3.11413
0.125	0.343	0.259		0 mM, OreR, female	0.856	0.772	0.583522	10	5.83522
0.25	0.558	0.474		10 mM, OreR, female	0.888	0.804	0.60771	10	6.0771
0.5	0.923	0.839		0 mM, VK00040, male	0.528	0.444	0.335601	10	3.35601
0.75	1.233	1.149		10 mM, VK00040, male	0.55	0.466	0.35223	10	3.5223
1	1.503	1.419		0 mM, VK00040, female	0.819	0.735	0.555556	10	5.55556
1.5	2.052	1.968		10 mM, VK00040, female	0.625	0.541	0.408919	10	4.08919
2	2.567	2.483		0 mM, AID, male	0.552	0.468	0.353741	10	3.53741
				10 mM, AID, male	0.636	0.552	0.417234	10	4.17234
				0 mM, AID, female	0.73	0.646	0.488284	10	4.88284
				10 mM, AID, female	0.924	0.84	0.634921	10	6.34921

## Sheet: N3_Analysis
Sample	Free Glycerol (mg/ml)	Triacylglycerol (mg/ml)	Adjusted TAG (mg/ml)	Protein (mg/ml)	Normalized TAG (mg/ml)
0 mM, OreR, male	0.0317999	0.65902	0.62722	4.78458	0.131092
10 mM, OreR, male	0.0402798	0.221064	0.180784	3.11413	0.0580527
0 mM, OreR, female	0.0487598	1.5537	1.50494	5.83522	0.257907
10 mM, OreR, female	0.0529998	0.606882	0.553882	6.0771	0.0911426
0 mM, VK00040, male	0.0275599	0.788321	0.760761	3.35601	0.226686
10 mM, VK00040, male	0.0211999	0.24609	0.22489	3.5223	0.0638475
0 mM, VK00040, female	0.0275599	1.15537	1.12781	5.55556	0.203006
10 mM, VK00040, female	0.0317999	0.456726	0.424926	4.08919	0.103914
0 mM, AID, male	0.0381598	0.890511	0.852351	3.53741	0.240953
10 mM, AID, male	0.0402798	0.327424	0.287145	4.17234	0.0688211
0 mM, AID, female	0.0381598	1.32013	1.28197	4.88284	0.262545
10 mM, AID, female	0.0339199	0.619395	0.585475	6.34921	0.0922124

## Sheet: Statistics
Males										Females
Oregon R			VK00040			AID				Oregon R			VK00040			AID
	0 mM	10 mM		0 mM	10 mM		0 mM	10 mM			0 mM	10 mM		0 mM	10 mM		0 mM	10 mM
N = 1	0.12	0.02	N = 1	0.16	0.03	N = 1	0.21	0.06		N = 1	0.2	0.07	N = 1	0.16	0.06	N = 1	0.24	0.14
N = 2	0.12	0.03	N = 2	0.14	0.07	N = 2	0.18	0.09		N = 2	0.28	0.07	N = 2	0.22	0.07	N = 2	0.21	0.11
N = 3	0.13	0.06	N = 3	0.23	0.06	N = 3	0.24	0.07		N = 3	0.26	0.09	N = 3	0.2	0.1	N = 3	0.26	0.09
Average	0.123333	0.0366667	Average	0.176667	0.0533333	Average	0.21	0.0733333		Average	0.246667	0.0766667	Average	0.193333	0.0766667	Average	0.236667	0.113333
Std. Dev.	0.0057735	0.0208167	Std. Dev.	0.0472582	0.0208167	Std. Dev.	0.03	0.0152753		Std. Dev.	0.0416333	0.011547	Std. Dev.	0.0305505	0.0208167	Std. Dev.	0.0251661	0.0251661
Std. Error	0.00333333	0.0120185	Std. Error	0.0272845	0.0120185	Std. Error	0.0173205	0.00881917		Std. Error	0.024037	0.00666667	Std. Error	0.0176383	0.0120185	Std. Error	0.0145297	0.0145297
F Test	0.142857		F Test	0.325		F Test	0.411765			F Test	0.142857		F Test	0.634146		F Test	1
T Test	0.00225326		T Test	0.0144148		T Test	0.00215561			T Test	0.00242296		T Test	0.00544834		T Test	0.00387734
Different?	Yes		Different?	Yes		Different?	Yes			Different?	Yes		Different?	Yes		Different?	Yes
0 mM Males vs Females										10 mM Males vs Females
Oregon R			VK00040			AID				Oregon R			VK00040			AID
	Males	Females		Males	Females		Males	Females			Males	Females		Males	Females		Males	Females
N = 1	0.12	0.2	N = 1	0.16	0.16	N = 1	0.21	0.24		N = 1	0.02	0.07	N = 1	0.03	0.06	N = 1	0.06	0.14
N = 2	0.12	0.28	N = 2	0.14	0.22	N = 2	0.18	0.21		N = 2	0.03	0.07	N = 2	0.07	0.07	N = 2	0.09	0.11
N = 3	0.13	0.26	N = 3	0.23	0.2	N = 3	0.24	0.26		N = 3	0.06	0.09	N = 3	0.06	0.1	N = 3	0.07	0.09
Average	0.123333	0.246667	Average	0.176667	0.193333	Average	0.21	0.236667		Average	0.0366667	0.0766667	Average	0.0533333	0.0766667	Average	0.0733333	0.113333
Std. Dev.	0.0057735	0.0416333	Std. Dev.	0.0472582	0.0305505	Std. Dev.	0.03	0.0251661		Std. Dev.	0.0208167	0.011547	Std. Dev.	0.0208167	0.0208167	Std. Dev.	0.0152753	0.0251661
Std. Error	0.00333333	0.024037	Std. Error	0.0272845	0.0176383	Std. Error	0.0173205	0.0145297		Std. Error	0.0120185	0.00666667	Std. Error	0.0120185	0.0120185	Std. Error	0.00881917	0.0145297
F Test	0.0377358		F Test	0.589474		F Test	0.826087			F Test	0.470588		F Test	1		F Test	0.538462
T Test	0.0338379		T Test	0.63499		T Test	0.303548			T Test	0.0436595		T Test	0.241746		T Test	0.0782249
Different?	Yes		Different?	No		Different?	No			Different?	Yes		Different?	No		Different?	No
