# Supplementary material for: Auxin exposure disrupts feeding behavior and fatty acid metabolism in adult Drosophila
Source: eLife. 2024 Jan 19;12:RP91953. doi: 10.7554/eLife.91953 (PMC10945601; doi:10.7554/eLife.91953)
Supplement: Figure 3—figure supplement 1—source data 1. [file elife-91953-fig3-figsupp1-data1.xlsx]

## Sheet: Sheet1
gene_id	Ore_10_f_1	Ore_10_f_2	Ore_10_f_3	Ore_0_f_1	Ore_0_f_2	Ore_0_f_3	WT_f_10	WT_f	log2FoldChange	pvalue	padj	gene_name	gene_chr	gene_start	gene_end	gene_strand	gene_length	gene_biotype	gene_description	tf_family	Ore_10_f_1_count	Ore_10_f_2_count	Ore_10_f_3_count	Ore_0_f_1_count	Ore_0_f_2_count	Ore_0_f_3_count	Ore_10_f_1_fpkm	Ore_10_f_2_fpkm	Ore_10_f_3_fpkm	Ore_0_f_1_fpkm	Ore_0_f_2_fpkm	Ore_0_f_3_fpkm
FBgn0266758	842.105	1145.79	895.411	369.364	309.48	337.982	961.103	338.942	1.50263	6.22232e-21	3.79496e-19	Esyt2	3R	24544719	24556549	+	3510	protein_coding	-	C2	922	1224	890	371	265	344	12.4947	16.6527	13.1717	5.55322	4.6886	5.08365
FBgn0031902	87.6812	144.16	91.5533	26.881	42.0425	45.1952	107.798	38.0396	1.50528	7.11205e-06	5.53549e-05	Wnt6	2L	7333714	7352542	+	2855	protein_coding	-	wnt	96	154	91	27	36	46	1.59944	2.57588	1.65575	0.496862	0.78307	0.835749
FBgn0052311	3174.79	3574.98	3047.42	1150.9	1101.28	1194.73	3265.73	1148.97	1.50675	6.08141e-48	1.84475e-45	zormin	3L	2117466	2151700	-	12186	protein_coding	-	I-set	3476	3819	3029	1156	943	1216	13.5682	14.9658	12.9121	4.98396	4.80568	5.17603
FBgn0010038	212.81	216.24	210.271	84.6253	72.4066	67.7929	213.107	74.9416	1.50695	7.70719e-15	2.48159e-13	GstD2	3R	12371971	12372704	+	734	protein_coding	-	GST_N	233	231	209	85	62	69	15.0995	15.0289	14.7914	6.08417	5.24566	4.87615
FBgn0035781	4963.12	5226.27	5276.89	1503.34	1884.91	2047.54	5155.43	1811.93	1.50866	3.83179e-31	4.85374e-29	CG8560	3L	7402332	7404181	-	1566	protein_coding	-	-	5434	5583	5245	1510	1614	2084	165.056	170.25	173.985	50.6598	64.0053	69.0288
FBgn0030348	180.843	127.31	163.991	76.6605	36.2033	52.0728	157.381	54.9789	1.51054	6.67195e-07	6.66443e-06	CG10352	X	11875306	11877168	-	1491	protein_coding	-	-	198	136	163	77	31	53	6.31669	4.35584	5.67897	2.71326	1.29118	1.84384
FBgn0038820	495.947	567.28	461.791	113.497	200.87	221.064	508.339	178.477	1.51133	2.56081e-10	4.83118e-09	CG4000	3R	20676224	20677351	-	999	protein_coding	-	-	543	606	459	114	172	225	25.8545	28.9679	23.8675	5.99539	10.6922	11.6826
FBgn0040092	46.5807	49.6136	65.3952	16.9251	11.6785	27.5102	53.8631	18.7046	1.51218	0.000292162	0.0014246	lectin-46Cb	2R	9815510	9816600	+	1039	protein_coding	-	Lectin_C	51	53	65	17	10	28	2.33484	2.43596	3.2498	0.85963	0.597708	1.39787
FBgn0005626	520.607	752.628	534.229	265.823	152.988	213.204	602.488	210.672	1.51341	7.42537e-11	1.52571e-09	ple	3L	6713356	6719525	-	3806	protein_coding	-	-	570	804	531	267	131	217	7.12374	10.0878	7.24745	3.68571	2.1375	2.95743
FBgn0024288	35.6205	28.0831	32.1946	11.9471	14.0142	7.86004	31.9661	11.2738	1.51386	0.00132995	0.00513408	Sox100B	3R	31065253	31083407	+	2049	protein_coding	-	HMG_box	39	30	32	12	12	8	0.905367	0.699181	0.811274	0.307693	0.3637	0.202522
FBgn0036742	210.07	275.215	206.246	93.5856	61.8959	85.478	230.51	80.3198	1.51592	8.42528e-11	1.71891e-09	CG7497	3L	17633449	17638001	+	1822	protein_coding	-	7tm_1	230	294	205	94	53	87	6.00457	7.70565	5.84473	2.71055	1.80647	2.47682
FBgn0024184	43.8406	58.9746	47.2858	13.9383	22.1891	16.7026	50.0337	17.61	1.51601	9.82587e-05	0.000557104	unc-4	X	17768569	17778708	+	2999	protein_coding	-	Homeobox	48	63	47	14	19	17	0.761319	1.00317	0.814106	0.245262	0.393443	0.294033
FBgn0036589	263.957	365.081	283.715	139.383	72.4066	105.128	304.251	105.639	1.52142	3.08196e-09	4.87321e-08	CG13067	3L	16271282	16271918	+	564	protein_coding	-	-	289	390	282	140	62	107	24.3737	33.0214	25.9734	13.0415	6.82679	9.84077
FBgn0038595	81.2878	49.6136	77.4682	21.903	19.8534	30.4577	69.4565	24.0714	1.5226	3.43876e-05	0.000222439	CG7142	3R	18278181	18279522	-	1342	protein_coding	-	Trypsin	89	53	77	22	17	31	3.15457	1.88597	2.98056	0.861288	0.786685	1.19821
FBgn0035904	1063.14	1244.08	1108.7	393.259	408.747	387.107	1138.64	396.371	1.52303	1.5963e-38	3.17252e-36	GstO3	3L	8518885	8520295	+	881	protein_coding	-	-	1164	1329	1102	395	350	394	62.8462	72.0376	64.9778	23.5559	24.6715	23.1977
FBgn0039347	30.1404	29.0192	25.152	10.9515	11.6785	6.87754	28.1039	9.83584	1.52388	0.00214488	0.00769262	CG5071	3R	25618414	25620679	+	2266	protein_coding	-	-	33	31	25	11	10	7	0.692718	0.653299	0.573112	0.255042	0.274059	0.160237
FBgn0083949	150.702	153.521	138.839	67.7002	46.7139	39.3002	147.687	51.2381	1.52567	5.37391e-09	8.24835e-08	CG34113	3R	5862865	5959555	-	8500	protein_coding	-	V-set	165	164	138	68	40	40	0.923352	0.921372	0.843373	0.420309	0.292244	0.244099
FBgn0039081	1316.13	1467.81	1378.33	521.69	449.621	472.585	1387.42	481.299	1.52628	1.28121e-41	2.89578e-39	Irk2	3R	23513617	23519445	-	2497	protein_coding	-	-	1441	1568	1370	524	385	481	27.4503	29.9873	28.5011	11.0253	9.57517	9.99196
FBgn0036945	1943.6	1987.35	2032.28	872.138	553.56	634.698	1987.74	686.799	1.53206	7.26353e-20	3.96809e-18	Ssk	3L	20188522	20189779	+	898	protein_coding	-	-	2128	2123	2020	876	474	646	112.719	112.897	116.852	51.2514	32.7798	37.3147
FBgn0034582	45.6673	62.719	57.3466	16.9251	17.5177	22.5976	55.2443	19.0135	1.53468	3.1745e-05	0.000206737	Cht9	2R	21067992	21069286	-	1161	protein_coding	-	-	50	67	57	17	15	23	2.04852	2.75583	2.55036	0.769299	0.802349	1.02759
FBgn0264827	129.695	142.288	131.797	68.6958	42.0425	28.4927	134.593	46.4103	1.53477	1.77285e-06	1.59529e-05	CR44035	3R	9810020	9813929	-	1602	lincRNA	-	ELO	142	152	131	69	36	29	4.21627	4.53097	4.24784	2.2629	1.39555	0.938987
FBgn0005659	403.699	460.564	372.25	166.264	115.617	143.446	412.171	141.775	1.53607	1.07752e-16	4.25361e-15	Ets98B	3R	27736538	27748366	+	3522	protein_coding	-	Ets	442	492	370	167	99	146	5.96946	6.67093	5.45722	2.49118	1.74562	2.15024
FBgn0011279	50.234	66.4634	72.4378	27.8766	15.182	21.6151	63.0451	21.5579	1.53733	3.48245e-05	0.000224886	Obp69a	3L	12396171	12396957	+	546	protein_coding	-	-	55	71	72	28	13	22	4.79151	6.20978	6.85014	2.69429	1.47861	2.09004
FBgn0037724	372.645	174.115	326.976	153.321	61.8959	84.4955	291.246	99.9042	1.54055	2.51445e-05	0.000168219	Fst	3R	9644978	9646154	-	1177	protein_coding	-	-	408	186	325	154	53	86	16.4887	7.54652	14.3439	6.87421	2.79643	3.79006
FBgn0036789	34.7072	38.3803	29.1763	14.9339	7.00709	12.7726	34.0879	11.5712	1.54548	0.00107884	0.00432385	AstC-R2	3L	18485137	18502557	-	3735	protein_coding	-	7tm_1	38	41	29	15	6	13	0.483944	0.524208	0.403336	0.210998	0.0997619	0.180541
FBgn0023535	525.174	616.893	615.721	182.193	205.541	214.186	585.929	200.64	1.54621	7.00341e-26	5.97987e-24	arg	X	509435	528028	+	1243	protein_coding	-	-	575	659	612	183	176	218	22.0039	25.3177	25.5764	7.73496	8.79318	9.09724
FBgn0031089	955.36	1146.73	895.411	241.929	387.726	395.95	999.167	341.868	1.54835	2.17751e-14	6.69337e-13	CG9572	X	20148124	20155514	+	1667	protein_coding	-	-	1046	1225	890	243	332	403	29.8468	35.0922	27.7341	7.65859	12.3682	12.5399
FBgn0034693	787.305	953.891	826.998	249.893	324.662	303.594	856.064	292.716	1.54993	7.39372e-25	5.91857e-23	CG11073	2R	22091489	22099534	-	3773	protein_coding	-	-	862	1019	822	251	278	309	10.8673	12.8973	11.3173	3.49514	4.57575	4.24811
FBgn0265185	2501.66	2382.39	2502.12	841.275	795.304	881.307	2462.05	839.295	1.55175	9.84918e-64	4.93615e-61	CG44250	2R	12950404	12952293	-	1100	protein_coding	-	-	2739	2545	2487	845	681	897	118.441	110.486	117.447	40.3592	38.4467	42.2984
FBgn0038761	116.908	161.946	120.73	46.7928	49.0496	40.2827	133.195	45.375	1.55666	3.41228e-09	5.37341e-08	CG17190	3R	20011776	20013504	-	932	protein_coding	-	-	128	173	120	47	42	41	6.53275	8.86422	6.68844	2.64948	2.79858	2.28188
FBgn0011589	91.3346	95.4827	119.724	39.8237	32.6997	31.4402	102.18	34.6545	1.55692	3.90948e-08	5.17896e-07	Elk	2R	17873939	17926695	+	5351	protein_coding	-	Ion_trans	100	102	119	40	28	32	0.888929	0.910281	1.15524	0.392738	0.324958	0.310198
FBgn0036022	1164.52	1425.69	1365.25	371.356	440.279	531.535	1318.49	447.723	1.5578	3.01509e-22	2.05651e-20	CG8329	3L	9638112	9639021	+	910	protein_coding	-	Trypsin	1275	1523	1357	373	377	541	66.6455	79.9225	77.4636	21.535	25.7279	30.8376
FBgn0036680	158.922	156.33	180.088	65.709	47.8818	54.0378	165.113	55.8762	1.55789	8.11214e-12	1.91224e-10	Cpr73D	3L	16939100	16957689	-	3030	protein_coding	-	Chitin_bind_4	174	167	179	66	41	55	2.73155	2.63199	3.06881	1.1444	0.840322	0.941552
FBgn0035344	347.072	356.656	344.079	106.528	116.785	131.656	349.269	118.323	1.561	5.26355e-22	3.48695e-20	Cyp4d20	3L	2476259	2478448	-	1817	protein_coding	-	p450	380	381	342	107	100	134	9.94789	10.0134	9.77756	3.09391	3.41782	3.82538
FBgn0039038	42.9273	38.3803	40.2432	4.97796	19.8534	16.7026	40.5169	13.8447	1.56121	0.00186035	0.00680298	CG6688	3R	23012412	23015475	+	1778	protein_coding	-	-	47	41	40	5	17	17	1.25738	1.10119	1.16866	0.147746	0.593774	0.495954
FBgn0030887	158.009	184.413	157.955	58.7399	64.2316	47.1603	166.792	56.7106	1.56134	8.39893e-12	1.97178e-10	CG6867	X	18023870	18028261	+	3196	protein_coding	-	Collagen	173	197	157	59	55	48	2.57479	2.94354	2.55183	0.969892	1.06871	0.779038
FBgn0035480	85.8546	120.758	92.5594	41.8148	24.5248	34.3877	99.7238	33.5758	1.56267	5.67775e-07	5.77647e-06	CG14984	3L	3951193	3952550	-	709	protein_coding	-	-	94	129	92	42	21	35	6.30643	8.68868	6.74064	3.1123	1.8394	2.56063
FBgn0050502	140.655	146.968	125.76	41.8148	47.8818	50.1078	137.795	46.6015	1.56553	4.03721e-11	8.73113e-10	fa2h	2R	7446189	7451553	-	1399	protein_coding	-	-	154	157	125	42	41	51	5.23607	5.3591	4.64143	1.57728	1.82	1.89094
FBgn0038973	4630.67	6779.27	4981.1	1154.89	2474.67	1905.08	5463.68	1844.88	1.56669	3.16579e-10	5.91444e-09	Pebp1	3R	22466034	22466679	+	646	protein_coding	-	-	5070	7242	4951	1160	2119	1939	373.317	535.348	398.125	94.3417	203.705	155.693
FBgn0051036	21.9203	37.4442	36.2189	10.9515	9.34278	11.7901	31.8611	10.6948	1.56826	0.00143652	0.00547036	CG31036	3R	29908107	29912892	+	3322	protein_coding	-	-	24	40	36	11	8	12	0.343648	0.575004	0.56294	0.173969	0.149553	0.187373
FBgn0036939	193.629	225.601	177.07	56.7487	50.2175	93.338	198.767	66.7681	1.56834	5.88741e-09	9.00056e-08	CG7365	3L	20124298	20127381	-	1889	protein_coding	-	Lipase_GDSL	212	241	176	57	43	95	5.33834	6.0925	4.83994	1.58534	1.41365	2.60865
FBgn0033397	163.489	219.049	179.082	102.546	53.721	32.4227	187.207	62.8965	1.57223	2.03897e-05	0.000141076	Cyp4p3	2R	9242320	9244410	+	1667	protein_coding	-	p450	179	234	178	103	46	33	5.10763	6.70333	5.54682	3.24623	1.71367	1.02684
FBgn0040260	769.951	928.616	739.469	332.528	220.723	265.276	812.679	272.842	1.57246	2.70956e-18	1.25434e-16	Ugt36Bc	2L	16799025	16801584	+	1954	protein_coding	-	UDPGT	843	992	735	334	189	270	20.5213	24.2436	19.5399	8.98049	6.00678	7.16743
FBgn0037601	93.1613	83.3133	70.4256	30.8633	22.1891	29.4752	82.3001	27.5092	1.57536	4.30562e-07	4.5325e-06	Cyp313b1	3R	8643070	8645650	-	2138	protein_coding	-	p450	102	89	70	31	19	30	2.26931	1.98789	1.70079	0.761785	0.551887	0.727843
FBgn0035090	1304.26	1346.12	1244.52	408.192	414.586	481.428	1298.3	434.735	1.57756	2.72036e-42	6.6032e-40	CG2736	2R	24973431	24975341	-	1726	protein_coding	-	-	1428	1438	1237	410	355	490	39.3541	39.7858	37.2296	12.4802	12.773	14.7258
FBgn0267702	41.1006	43.9969	29.1763	20.9074	9.34278	7.86004	38.0913	12.7034	1.57878	0.00179469	0.00659046	CR46035	3R	17703695	17705581	+	1887	lincRNA	-	-	45	47	29	21	8	8	1.13434	1.18942	0.798335	0.58469	0.263283	0.219909
FBgn0036411	57.5408	61.7829	51.3101	27.8766	16.3499	12.7726	56.8779	18.9997	1.57893	6.83054e-05	0.000405644	Sox21a	3L	14103481	14108118	-	2335	protein_coding	-	HMG_box	63	66	51	28	14	13	1.28338	1.34979	1.1346	0.630013	0.372345	0.288789
FBgn0051798	28.3137	18.7221	26.1581	12.9427	2.3357	8.84255	24.398	8.04031	1.57967	0.0113681	0.0307606	CG31798	2L	19394160	19396190	+	1913	protein_coding	-	-	31	20	26	13	2	9	0.770813	0.499258	0.706021	0.357032	0.0649261	0.244035
FBgn0037750	607.375	579.449	625.782	213.057	188.024	204.361	604.202	201.814	1.57987	1.74745e-33	2.54973e-31	Whamy	3R	9771795	9774419	-	2184	protein_coding	-	-	665	619	622	214	161	208	14.4834	13.5347	14.7944	5.14801	4.57802	4.94009
FBgn0036839	47.494	58.0385	31.1885	7.96473	15.182	22.5976	45.5737	15.2481	1.58002	0.00123259	0.00483763	CG18136	3L	19000985	19003252	-	1856	protein_coding	-	SET	52	62	31	8	13	23	1.33268	1.59523	0.867647	0.226459	0.43498	0.642797
FBgn0085440	21.9203	25.2748	15.0912	7.96473	7.00709	5.89503	20.7621	6.95562	1.58086	0.00705031	0.0207955	CG34411	X	13161714	13189164	-	2975	protein_coding	-	7tm_1	24	27	15	8	6	6	0.383731	0.433398	0.261917	0.14128	0.125247	0.104614
FBgn0033500	18.2669	38.3803	34.2067	15.9295	10.5106	3.93002	30.2847	10.1234	1.58198	0.00880661	0.0249358	CG12913	2R	10249220	10255495	+	2523	protein_coding	-	-	20	41	34	16	9	4	0.377064	0.776027	0.700037	0.333182	0.221528	0.082237
FBgn0032836	2431.33	3042.34	2609.77	1016.5	754.43	915.695	2694.48	895.541	1.58825	1.76015e-27	1.67679e-25	CG10680	2L	19964136	19965702	+	1272	protein_coding	-	-	2662	3250	2594	1021	646	932	99.5458	122.013	105.936	42.1713	31.5391	38.0061
FBgn0039596	31.9671	31.8276	33.2006	13.9383	9.34278	8.84255	32.3318	10.7079	1.58961	0.000651936	0.0028072	CG10000	3R	28748384	28751661	-	2597	protein_coding	-	Glycos_transf_2	35	34	33	14	8	9	0.641059	0.625198	0.660087	0.283227	0.191303	0.179761
FBgn0259714	166.229	146.032	182.101	77.6561	47.8818	38.3177	164.787	54.6185	1.59056	4.06856e-08	5.35687e-07	CG42368	2L	6377771	6411326	-	3150	protein_coding	-	I-set	182	156	181	78	41	39	2.74829	2.36496	2.98488	1.30096	0.808309	0.642212
FBgn0039184	962.667	1221.62	998.032	271.796	339.844	444.092	1060.77	351.911	1.59141	2.1443e-16	8.15755e-15	CG6432	3R	24336922	24340645	+	2715	protein_coding	-	AMP-binding	1054	1305	992	273	291	452	18.466	22.9536	18.9802	5.28288	6.65622	8.63561
FBgn0034605	1071.36	1365.78	1153.97	422.131	383.054	384.16	1197.04	396.448	1.59381	1.10421e-31	1.46302e-29	CG15661	2R	21215435	21217779	-	1899	protein_coding	-	UDPGT	1173	1459	1147	424	328	391	29.3816	36.6894	31.376	11.7306	10.7264	10.6801
FBgn0026872	428.359	528.899	443.681	105.533	161.163	197.484	466.98	154.726	1.59395	3.81384e-12	9.35364e-11	CG14777	X	1466134	1468692	+	1705	protein_coding	-	Mpv17_PMP22	469	565	441	106	138	201	13.0843	15.8247	13.4361	3.26633	5.02642	6.11499
FBgn0000492	152.529	189.093	199.204	65.709	38.539	73.6879	180.275	59.312	1.59481	5.14767e-09	7.93278e-08	Dr	3R	29556386	29565244	+	2552	protein_coding	-	Homeobox	167	202	198	66	33	75	3.1127	3.77991	4.03036	1.35876	0.803041	1.52442
FBgn0037563	640.256	867.769	742.487	194.14	265.101	285.909	750.171	248.384	1.59525	3.14828e-17	1.32446e-15	CG11672	3R	8289395	8290578	-	1122	protein_coding	-	-	701	927	738	195	227	291	29.7185	39.4546	34.1683	9.13104	12.5643	13.4532
FBgn0053281	137.002	170.371	109.663	40.8192	56.0567	41.2652	139.012	46.0471	1.60121	1.18753e-08	1.75496e-07	CG33281	2L	3324237	3326637	+	1594	protein_coding	-	Sugar_tr	150	182	109	41	48	42	4.47615	5.45247	3.5522	1.35137	1.87007	1.36674
FBgn0032663	27.4004	14.9777	24.1459	3.98237	7.00709	10.8076	22.1747	7.26567	1.60709	0.00914096	0.0257057	CG15153	2L	18090737	18092256	-	1317	protein_coding	-	-	30	16	24	4	6	11	1.08352	0.580156	0.94664	0.15957	0.282924	0.433243
FBgn0261258	2770.18	3194.93	2858.27	1095.15	856.033	936.328	2941.13	962.504	1.61073	2.17128e-37	3.97275e-35	rgn	3L	21382501	21424416	+	4346	protein_coding	-	Lectin_C	3033	3413	2841	1100	733	953	33.1959	37.5022	33.9579	13.2978	10.4741	11.3744
FBgn0005613	42.9273	37.4442	28.1702	6.96914	14.0142	14.7376	36.1806	11.907	1.61074	0.000809582	0.00338363	Sox15	2R	14201390	14212413	-	3651	protein_coding	-	HMG_box	47	40	28	7	12	15	0.612334	0.523189	0.398387	0.100731	0.204114	0.21311
FBgn0039645	154.356	209.687	169.021	61.7267	51.3853	60.9153	177.688	58.0091	1.61144	5.71449e-12	1.37231e-10	CG11898	3R	29165643	29171508	+	4472	protein_coding	-	ABC_membrane	169	224	168	62	44	62	1.79758	2.39197	1.95149	0.728397	0.61102	0.719141
FBgn0038414	137.915	174.115	178.076	57.7443	50.2175	52.0728	163.369	53.3448	1.61197	4.98228e-12	1.20907e-10	CG6901	3R	16323415	16325128	+	1581	protein_coding	-	Sugar_tr	151	186	177	58	43	53	4.54305	5.61812	5.81568	1.92741	1.68904	1.73887
FBgn0037766	94.0747	255.557	109.663	50.7752	57.2245	42.2477	153.098	50.0825	1.61449	4.97633e-05	0.000308398	Teh1	3R	9826081	9868120	-	4539	protein_coding	-	-	103	273	109	51	49	43	1.07939	2.87219	1.24746	0.590321	0.67041	0.491397
FBgn0052557	213.723	193.774	210.271	52.7663	61.8959	86.4605	205.922	67.0409	1.61623	3.66929e-12	9.07638e-11	CG32557	X	17852958	17856129	-	2131	protein_coding	-	-	234	207	209	53	53	88	5.22317	4.63871	5.09474	1.30668	1.54453	2.14202
FBgn0033602	54.8008	48.6775	55.3344	18.9162	12.8463	19.6501	52.9375	17.1376	1.61688	1.48655e-05	0.000106963	Cpr47Ee	2R	11265126	11266856	+	1386	protein_coding	-	Chitin_bind_4	60	52	55	19	11	20	2.05916	1.79164	2.06138	0.720226	0.492872	0.748499
FBgn0039297	168.056	182.54	177.07	53.7619	68.903	50.1078	175.889	57.5909	1.61761	2.51845e-13	7.02911e-12	CG11852	3R	25237614	25238895	+	1045	protein_coding	-	-	184	195	176	54	59	51	8.37536	8.91104	8.74895	2.71491	3.50623	2.5315
FBgn0001112	170.796	143.224	127.772	71.6826	30.364	41.2652	147.264	47.7706	1.6177	6.78817e-07	6.76879e-06	Gld	3R	7252063	7265703	-	2899	protein_coding	-	-	187	153	127	72	26	42	3.06828	2.52031	2.2757	1.30486	0.556967	0.751494
FBgn0032835	615.595	647.785	614.715	187.171	165.834	257.416	626.032	203.474	1.61811	1.61715e-19	8.4948e-18	CG16772	2L	19962679	19963844	+	1095	protein_coding	-	-	674	692	611	188	142	262	29.2784	30.1788	28.9859	9.02032	8.05339	12.4111
FBgn0027546	25.5737	38.3803	29.1763	6.96914	11.6785	11.7901	31.0434	10.1459	1.6185	0.00114952	0.00455814	CG4766	X	5997508	6000797	-	2673	protein_coding	-	-	28	41	29	7	10	12	0.498266	0.732479	0.563584	0.137587	0.23233	0.232866
FBgn0031034	376.299	230.282	156.949	134.405	60.7281	52.0728	254.51	82.4019	1.62569	5.80421e-05	0.000352504	CG14205	X	19592609	19595548	+	2338	protein_coding	-	-	412	246	156	135	52	53	8.38214	5.02459	3.46609	3.03366	1.38122	1.17586
FBgn0039257	212.81	265.854	222.344	100.555	63.0638	62.8803	233.669	75.4996	1.62657	2.15907e-11	4.82288e-10	tnc	3R	24984384	25022867	+	10448	protein_coding	-	-	233	284	221	101	54	64	1.06078	1.29806	1.0988	0.507886	0.32097	0.317739
FBgn0039536	745.291	866.833	732.426	224.008	272.109	263.311	781.517	253.143	1.6279	6.24717e-30	6.99138e-28	unc80	3R	27662439	27677099	+	10271	protein_coding	-	-	816	926	728	225	233	268	3.77902	4.30535	3.68195	1.15093	1.40879	1.35346
FBgn0033760	405.526	592.554	428.59	116.484	170.506	174.886	475.557	153.959	1.62852	3.16385e-13	8.74572e-12	CG8785	2R	12640690	12648224	-	2189	protein_coding	-	Aa_trans	444	633	426	117	146	178	9.64805	13.8092	10.1093	2.80814	4.14201	4.21792
FBgn0041713	62.1076	89.8661	68.4135	16.9251	28.0284	26.5276	73.4624	23.827	1.62992	3.73589e-06	3.14103e-05	yellow-c	2L	15035394	15037841	+	1600	protein_coding	-	-	68	96	68	17	24	27	2.02158	2.86524	2.20774	0.558222	0.931527	0.875322
FBgn0033205	768.124	953.891	895.411	311.62	245.248	286.892	872.475	281.253	1.63093	1.32255e-27	1.27042e-25	CG2064	2R	7665828	7667343	+	1210	protein_coding	-	adh_short	841	1019	890	313	210	292	33.0608	40.216	38.2088	13.5906	10.778	12.5176
FBgn0259715	3581.23	3434.57	3690.3	1031.43	1164.34	1259.57	3568.7	1151.78	1.63152	1.58529e-52	5.7105e-50	CG42369	2L	6395853	6397249	-	1397	protein_coding	-	-	3921	3669	3668	1036	997	1282	133.507	125.419	136.393	38.962	44.3203	47.601
FBgn0038956	17.3536	21.5304	13.079	4.97796	7.00709	4.91253	17.321	5.63252	1.63279	0.0109693	0.0299034	CG5379	3R	22386489	22389714	-	1471	protein_coding	-	-	19	23	13	5	6	5	0.614388	0.746664	0.459082	0.178581	0.253304	0.176312
FBgn0051792	33.7938	58.9746	36.2189	10.9515	11.6785	18.6676	42.9958	13.7659	1.63785	0.000423998	0.00194796	CG31792	2L	18997448	19002713	+	4390	protein_coding	-	ABC_membrane	37	63	36	11	10	19	0.400903	0.685309	0.425988	0.131646	0.141462	0.224498
FBgn0033873	100.468	120.758	103.626	25.8854	37.3711	41.2652	108.284	34.8406	1.63801	1.03364e-08	1.53541e-07	CG6337	2R	13833575	13835096	-	1402	protein_coding	-	Peptidase_C1	110	129	103	26	32	42	3.73204	4.39392	3.81635	0.974324	1.41745	1.55391
FBgn0004618	66.6743	96.4188	56.3405	23.8942	19.8534	26.5276	73.1445	23.4251	1.63877	5.83102e-06	4.65422e-05	gl	3R	18367927	18372738	-	3399	protein_coding	-	zf-C2H2	73	103	56	24	17	27	1.02158	1.44709	0.855847	0.37097	0.3106	0.412038
FBgn0031887	29.2271	35.572	22.1338	8.96032	7.00709	11.7901	28.9776	9.25249	1.63898	0.00147746	0.00559852	CG11289	2L	7067983	7069546	+	1513	protein_coding	-	UDPGT	32	38	22	9	6	12	1.00604	1.19937	0.755341	0.312523	0.246273	0.411402
FBgn0037730	84.0279	101.099	90.5472	27.8766	25.6927	34.3877	91.8915	29.319	1.64292	1.82059e-08	2.59406e-07	CG9444	3R	9681415	9684264	-	2062	protein_coding	-	-	92	108	90	28	22	35	2.12227	2.50118	2.26732	0.713424	0.66258	0.880448
FBgn0046689	155.269	104.844	155.942	70.687	22.1891	39.3002	138.685	44.0588	1.64643	2.22131e-05	0.000151353	Takl1	3R	20770828	20772601	-	1323	protein_coding	-	Pkinase	170	112	155	71	19	40	6.11211	4.04267	6.08599	2.81953	0.891863	1.56828
FBgn0013751	19.1803	23.4026	35.2128	6.96914	5.83924	11.7901	25.9319	8.19948	1.64685	0.00387644	0.0126154	Awh	3L	3846206	3861692	+	2104	protein_coding	-	Homeobox	21	25	35	7	5	12	0.474762	0.56742	0.864135	0.174796	0.14758	0.295842
FBgn0039770	60.2809	71.144	62.377	16.9251	25.6927	19.6501	64.6006	20.7559	1.64724	1.76183e-06	1.58661e-05	CG15537	3R	30435177	30443599	-	1600	protein_coding	-	-	66	76	62	17	22	20	1.96212	2.26832	2.01294	0.558222	0.8539	0.648387
FBgn0035144	179.929	178.796	207.253	60.7311	36.2033	82.5305	188.659	59.8216	1.64791	9.34798e-09	1.39217e-07	Kah	3L	582824	589274	-	2825	protein_coding	-	zf-C2H2	197	191	206	61	31	84	3.31703	3.22868	3.78798	1.13446	0.681471	1.54236
FBgn0033904	105.035	140.416	121.736	33.8501	42.0425	41.2652	122.395	39.0526	1.65023	5.87684e-10	1.0599e-08	CG18327	2R	14166982	14168233	+	1064	protein_coding	-	Mito_carr	115	150	121	34	36	42	5.14113	6.73225	5.90749	1.67886	2.10119	2.04754
FBgn0030347	841.192	862.153	834.04	290.713	244.08	272.154	845.795	268.982	1.65052	8.98024e-42	2.0703e-39	CG15739	X	11873319	11875346	+	1529	protein_coding	-	-	921	921	829	292	209	277	28.652	28.7649	28.1648	10.0335	8.48874	9.39716
FBgn0032495	49.3207	100.163	75.456	25.8854	30.364	15.7201	74.98	23.9898	1.65101	4.74944e-05	0.000296089	CG16820	2L	13246232	13250189	+	1574	protein_coding	-	-	54	107	75	26	26	16	1.63189	3.24631	2.47523	0.867854	1.02582	0.527278
FBgn0053288	31.9671	30.8915	29.1763	11.9471	10.5106	6.87754	30.6783	9.77842	1.65401	0.000643971	0.00278017	CG33288	3L	21427790	21433066	+	3690	protein_coding	-	-	35	33	29	12	9	7	0.451174	0.427069	0.408254	0.170857	0.151468	0.0984002
FBgn0036501	772.691	883.683	806.876	274.783	239.409	266.259	821.083	260.15	1.65628	7.93196e-38	1.49888e-35	CG7272	3L	15500938	15503769	+	1191	protein_coding	-	-	846	944	802	276	205	271	33.7879	37.8504	34.9802	12.1752	10.6892	11.8027
FBgn0033249	47.494	86.1216	61.3709	18.9162	24.5248	18.6676	64.9955	20.7029	1.65636	1.69001e-05	0.000119728	CG11191	2R	8000490	8002120	-	1459	protein_coding	-	-	52	92	61	19	21	19	1.69531	3.01122	2.17187	0.68419	0.893857	0.675496
FBgn0033789	58.4542	90.8022	97.5898	39.8237	3.50354	34.3877	82.282	25.905	1.65647	0.00525544	0.0163274	CG13324	2R	13049146	13049656	-	511	protein_coding	-	-	64	97	97	40	3	35	5.95746	9.06486	9.86075	4.11261	0.36459	3.55281
FBgn0052392	31.0538	48.6775	28.1702	7.96473	9.34278	16.7026	35.9672	11.3367	1.65979	0.00108738	0.00435065	CG32392	3L	6756629	6763246	-	2831	protein_coding	-	-	34	52	28	8	8	17	0.57127	0.87715	0.51378	0.148466	0.175491	0.311482
FBgn0263316	817.445	951.082	848.126	326.554	230.066	268.224	872.218	274.948	1.66309	9.33142e-26	7.79444e-24	Mrp4	3R	11569250	11575937	+	4726	protein_coding	-	ABC_membrane	895	1016	843	328	197	273	9.00806	10.2662	9.26602	3.64635	2.58867	2.99635
FBgn0033985	14.6135	24.3387	28.1702	2.98677	10.5106	7.86004	22.3742	7.11915	1.66525	0.00909298	0.025602	CG10257	2R	14942398	14944469	+	1377	protein_coding	-	-	16	26	28	3	9	8	0.552698	0.901674	1.05629	0.114463	0.405894	0.301356
FBgn0263621	31.9671	28.0831	30.1824	10.9515	12.8463	4.91253	30.0776	9.57012	1.66631	0.00122546	0.00481783	CG43630	3R	12676010	12676260	-	251	protein_coding	-	-	35	30	30	11	11	5	6.63279	5.70766	6.20879	2.30249	2.72159	1.03329
FBgn0032435	663.089	660.89	639.867	238.942	199.702	179.798	654.615	206.147	1.66659	4.94363e-30	5.64211e-28	Oatp33Eb	2L	12448484	12452047	+	2743	protein_coding	-	-	726	706	636	240	171	183	12.5896	12.2911	12.0446	4.59689	3.87146	3.46059
FBgn0042102	375.385	272.406	312.891	126.44	93.4278	82.5305	320.228	100.799	1.66668	9.42574e-14	2.71626e-12	CG18745	3R	7783843	7786119	-	1567	protein_coding	-	-	411	291	311	127	80	84	12.476	8.86818	10.3098	4.25807	3.17048	2.78057
FBgn0013771	1774.63	1937.74	1636.89	731.76	437.943	505.99	1783.09	558.564	1.67348	8.13991e-19	4.00977e-17	Cyp6a9	2R	14879356	14881372	-	1964	protein_coding	-	p450	1943	2070	1627	735	375	515	47.058	50.3314	43.0334	19.6618	11.8575	13.6016
FBgn0267659	36.5339	26.2109	13.079	8.96032	5.83924	8.84255	25.2746	7.8807	1.6764	0.00601397	0.0182189	CR45997	2R	17262339	17262748	+	410	lincRNA	-	-	40	28	13	9	5	9	4.64064	3.26125	1.6471	1.15329	0.757339	1.13863
FBgn0035043	563.535	586.938	561.393	138.387	181.016	214.186	570.622	177.863	1.68183	1.39567e-21	8.79122e-20	CG4781	2R	24640683	24642239	-	1557	protein_coding	-	-	617	627	558	139	155	218	18.8495	19.2304	18.6168	4.69034	6.18226	7.2626
FBgn0032414	60.2809	76.7606	51.3101	29.8677	11.6785	16.7026	62.7838	19.4163	1.68305	6.05042e-05	0.000365914	CG17211	2L	12114360	12129896	+	5159	protein_coding	-	-	66	82	51	30	10	17	0.608528	0.759029	0.513528	0.305516	0.120376	0.170926
FBgn0038693	590.022	805.986	587.551	202.105	192.695	222.046	661.186	205.615	1.68416	1.15986e-21	7.38657e-20	unc79	3R	19230764	19246130	-	10179	protein_coding	-	-	646	861	584	203	165	226	3.01877	4.03932	2.98035	1.04778	1.00666	1.15167
FBgn0050008	2689.8	3165.91	2771.75	915.944	866.543	895.062	2875.82	892.517	1.68773	1.18872e-57	4.72497e-55	CG30008	2R	9889878	9891141	+	965	protein_coding	-	ELO	2945	3382	2755	920	742	911	145.164	167.362	148.304	50.0886	47.7508	48.9683
FBgn0261714	244.777	300.49	291.763	88.6076	67.7352	102.181	279.01	86.1745	1.68869	9.33854e-16	3.31217e-14	Cpn	3R	12162887	12166186	-	2853	protein_coding	-	-	268	321	290	89	58	104	4.46823	5.37296	5.28026	1.63895	1.2625	1.89084
FBgn0034290	135.175	206.879	177.07	43.806	49.0496	67.7929	173.042	53.5495	1.68918	7.50325e-10	1.33062e-08	CG5773	2R	18042296	18043744	-	1357	protein_coding	-	-	148	221	176	44	42	69	5.18781	7.77719	6.7374	1.70354	1.92209	2.63751
FBgn0035317	42.0139	56.1663	36.2189	10.9515	12.8463	17.6851	44.7997	13.8276	1.69376	9.21894e-05	0.00052869	Oseg2	3L	2229646	2235253	+	5265	protein_coding	-	-	46	60	36	11	11	18	0.415587	0.544206	0.355192	0.109767	0.129747	0.177337
FBgn0029791	156.182	134.799	87.529	32.8545	43.2104	41.2652	126.17	39.11	1.69409	5.03806e-08	6.53248e-07	CG4096	X	5698557	5708633	+	3992	protein_coding	-	TSP_1	171	144	87	33	37	42	2.03755	1.72259	1.13211	0.434312	0.575593	0.545737
FBgn0035921	26.487	28.0831	17.1034	4.97796	10.5106	6.87754	23.8912	7.45538	1.698	0.00338517	0.0112745	CG13305	3L	8644916	8646822	-	1364	protein_coding	-	-	29	30	17	5	9	7	1.01131	1.05031	0.647432	0.19259	0.409763	0.2662
FBgn0265635	11.8735	16.8499	15.0912	5.97355	3.50354	3.93002	14.6049	4.46904	1.69921	0.0150065	0.0388632	CR44442	2R	6820560	6822596	-	1305	lincRNA	-	-	13	18	15	6	3	4	0.473844	0.658677	0.59709	0.241557	0.142763	0.158991
FBgn0037908	27.4004	41.1886	22.1338	8.96032	7.00709	11.7901	30.2409	9.25249	1.70079	0.00131583	0.00508636	dpr5	3R	11499984	11505951	+	1864	protein_coding	-	V-set	30	44	22	9	6	12	0.765557	1.12724	0.613107	0.253673	0.199899	0.333933
FBgn0029765	326.065	446.522	355.146	120.467	103.938	120.848	375.911	115.084	1.70534	4.12574e-19	2.07674e-17	CG16756	X	5427517	5428217	+	521	protein_coding	-	-	357	477	353	121	89	123	32.5936	43.7211	35.1962	12.2019	10.6086	12.2459
FBgn0032178	70.3277	104.844	78.4743	33.8501	11.6785	31.4402	84.5486	25.6563	1.70712	2.16521e-05	0.000148474	Spn31A	2L	10060816	10063925	+	1428	protein_coding	-	Serpin	77	112	78	34	10	32	2.56487	3.74542	2.83743	1.25092	0.434887	1.16237
FBgn0038337	695.97	840.622	751.542	206.087	220.723	272.154	762.711	232.988	1.70965	1.01188e-27	9.88468e-26	CG6125	3R	15402598	15407070	-	2532	protein_coding	-	Sulfate_transp	762	898	747	207	189	277	14.3151	16.9365	15.3256	4.29522	4.63556	5.67467
FBgn0036698	107.775	142.288	128.778	47.7884	28.0284	39.3002	126.28	38.3723	1.7098	1.82062e-09	2.96972e-08	CG7724	3L	17055613	17058533	+	1418	protein_coding	-	-	118	152	128	48	24	40	3.95829	5.11891	4.68914	1.77846	1.05109	1.46321
FBgn0038880	26.487	16.8499	24.1459	13.9383	3.50354	2.94752	22.4943	6.79645	1.71395	0.0140342	0.0367331	SIFaR	3R	21276664	21293998	-	5029	protein_coding	-	7tm_1	29	18	24	14	3	3	0.274295	0.170923	0.247907	0.14626	0.0370462	0.0309431
FBgn0035623	46.5807	39.3164	37.225	14.9339	9.34278	12.7726	41.0407	12.3497	1.72401	6.18071e-05	0.000372991	mthl2	3L	5604790	5607190	+	2035	protein_coding	-	7tm_2	51	42	37	15	8	13	1.19209	0.985588	0.944488	0.387262	0.244135	0.331362
FBgn0085227	495.947	466.18	521.15	192.149	124.96	130.673	494.426	149.261	1.72491	2.7666e-19	1.41736e-17	CG34198	2R	19682446	19682977	-	532	protein_coding	-	-	543	498	518	193	107	133	48.5501	44.7021	50.5798	19.06	12.4904	12.9677
FBgn0037488	57.5408	82.3772	58.3527	10.9515	25.6927	23.5801	66.0902	20.0748	1.72732	1.92707e-05	0.000134463	CG14607	3R	7241760	7244006	+	1472	protein_coding	-	CBM_14	63	88	58	11	22	24	2.0358	2.85486	2.04682	0.392612	0.928152	0.845722
FBgn0038074	6189.75	5694.33	6570.71	1624.81	2093.95	1830.41	6151.59	1849.72	1.73415	2.38721e-45	6.39938e-43	Gnmt	3R	12674608	12676084	+	990	protein_coding	-	-	6777	6083	6531	1632	1793	1863	325.615	293.422	342.692	86.609	112.473	97.6117
FBgn0002732	16.4402	16.8499	18.1094	5.97355	2.3357	6.87754	17.1332	5.06226	1.73593	0.00889189	0.0251156	E(spl)malpha-BFM	3R	26010893	26011568	+	676	protein_coding	-	-	18	18	18	6	2	7	1.26657	1.27156	1.3832	0.466319	0.183733	0.537125
FBgn0266168	15.5269	18.7221	35.2128	10.9515	4.67139	4.91253	23.1539	6.84514	1.74496	0.00740029	0.0216176	CR44874	2L	10051362	10052289	+	928	lincRNA	-	-	17	20	35	11	4	5	0.871371	1.02918	1.9592	0.622763	0.26768	0.279477
FBgn0013812	168.056	213.432	174.052	64.7134	43.2104	56.9853	185.18	54.9697	1.74586	3.98159e-13	1.08501e-11	Dhc93AB	3R	21024580	21042499	-	14010	protein_coding	-	Dynein_heavy	184	228	173	65	37	58	0.624715	0.777154	0.641457	0.243755	0.164009	0.214741
FBgn0000241	73.0677	68.3357	68.4135	17.9206	21.0213	23.5801	69.9389	20.8407	1.7469	9.74216e-08	1.19721e-06	bw	2R	23527805	23538499	-	2738	protein_coding	-	ABC_tran	80	73	68	18	18	24	1.38982	1.27321	1.29013	0.345396	0.408266	0.454676
FBgn0038790	122.388	93.6105	112.681	32.8545	31.5319	33.4052	109.56	32.5972	1.74769	2.25732e-10	4.30085e-09	MtnC	3R	20360308	20360634	+	268	protein_coding	-	-	134	100	112	33	27	34	23.7833	17.8187	21.7091	6.4693	6.25653	6.58064
FBgn0011283	211.896	245.259	244.477	60.7311	64.2316	82.5305	233.878	69.1644	1.7545	4.70047e-17	1.94202e-15	Obp28a	2L	7496791	7497365	-	575	protein_coding	-	-	232	262	243	61	55	84	19.1921	21.7592	21.9532	5.57366	5.94017	7.57767
FBgn0250757	2496.18	3296.96	2666.11	877.116	810.486	813.514	2819.75	833.706	1.75778	7.8729e-40	1.65002e-37	CG42235	3R	25907022	25921046	+	8363	protein_coding	-	-	2733	3522	2650	881	694	828	15.5446	20.1112	16.4605	5.53467	5.15349	5.13562
FBgn0037100	121.475	140.416	119.724	45.7972	37.3711	29.4752	127.205	37.5478	1.76107	6.04241e-11	1.26638e-09	CapaR	3L	21558974	21562181	-	1827	protein_coding	-	-	133	150	119	46	32	30	3.4627	3.92069	3.38351	1.32281	1.08772	0.85174
FBgn0260874	16.4402	15.9138	17.1034	4.97796	4.67139	4.91253	16.4858	4.85396	1.76198	0.00661619	0.0196863	Ir76a	3L	19799278	19803427	+	2109	protein_coding	-	-	18	17	17	5	4	5	0.405974	0.384931	0.418728	0.124558	0.117784	0.122975
FBgn0038350	31.9671	30.8915	33.2006	9.95591	11.6785	6.87754	32.0197	9.50398	1.76238	0.000248729	0.00124278	AOX4	3R	15548628	15552833	-	3832	protein_coding	-	-	35	33	33	10	10	7	0.434455	0.411243	0.44735	0.137105	0.162061	0.0947538
FBgn0039749	17.3536	13.1055	12.073	4.97796	4.67139	2.94752	14.1773	4.19895	1.76308	0.0137699	0.0361479	CG11498	3R	30153022	30160473	-	2506	protein_coding	-	-	19	14	12	5	4	3	0.360641	0.266782	0.248748	0.104826	0.099125	0.0620961
FBgn0030271	73.0677	110.46	90.5472	32.8545	30.364	17.6851	91.3584	26.9679	1.76462	3.28569e-07	3.5596e-06	CG15202	X	11142541	11143755	+	863	protein_coding	-	-	80	118	90	33	26	18	4.40942	6.52952	5.4174	2.00901	1.87097	1.0819
FBgn0034716	1592.88	1801.07	1403.48	480.871	404.075	522.693	1599.14	469.213	1.76759	5.28394e-33	7.6135e-31	Oatp58Dc	2R	22223681	22228574	-	3138	protein_coding	-	-	1744	1924	1395	483	346	532	26.436	29.2794	23.093	8.08672	6.84743	8.79393
FBgn0033603	84.9412	90.8022	80.4864	19.9118	28.0284	27.5102	85.4099	25.1501	1.76838	7.63283e-09	1.15162e-07	Cpr47Ef	2R	11266915	11272575	-	2198	protein_coding	-	Chitin_bind_4	93	97	80	20	24	28	2.0126	2.10744	1.8907	0.478058	0.678091	0.660777
FBgn0038484	227.423	241.515	238.441	74.6694	74.7423	57.9678	235.793	69.1265	1.77334	2.89009e-19	1.47408e-17	CG5246	3R	17136111	17137195	+	1085	protein_coding	-	Trypsin	249	258	237	75	64	59	10.9162	11.3553	11.3469	3.6317	3.66315	2.82063
FBgn0036948	276.744	353.848	298.806	95.5768	107.442	65.8279	309.799	89.6155	1.79451	8.8581e-16	3.16122e-14	CG7298	3L	20202070	20203687	-	1323	protein_coding	-	CBM_14	303	378	297	96	92	67	10.8939	13.644	11.6615	3.81232	4.31849	2.62687
FBgn0035734	664.003	731.098	647.916	226.995	189.191	171.938	681.005	196.042	1.79608	1.97888e-32	2.71555e-30	CG14823	3L	7066314	7069463	+	2339	protein_coding	-	-	727	781	644	228	162	175	14.7845	15.9452	14.3026	5.12133	4.30119	3.8809
FBgn0036835	80.3745	88.93	99.6019	26.881	15.182	34.3877	89.6355	25.4836	1.80017	1.49582e-07	1.75405e-06	CG14075	3L	18984961	18985634	+	674	protein_coding	-	-	88	95	99	27	13	35	6.21048	6.73091	7.63018	2.10466	1.19781	2.6936
FBgn0261928	505.081	687.101	536.241	207.083	145.981	142.463	576.141	165.176	1.80087	1.02728e-18	4.95458e-17	CG42795	3R	10225690	10251277	+	11033	protein_coding	-	TBC	553	734	533	208	125	145	2.38415	3.17697	2.50953	0.990485	0.703592	0.681708
FBgn0038198	658.523	878.066	863.217	215.048	211.38	260.364	799.935	228.931	1.80327	1.81314e-26	1.62016e-24	Npc2b	3R	14089517	14092425	+	922	protein_coding	-	-	721	938	858	216	181	265	37.1969	48.5828	48.341	12.3084	12.1914	14.9087
FBgn0053509	218.29	266.79	218.319	75.6649	66.5673	58.9503	234.466	67.0609	1.80617	1.06559e-17	4.77941e-16	CG33509	2L	21084605	21086506	-	1405	protein_coding	-	-	239	285	217	76	57	60	8.0914	9.68677	8.02311	2.84194	2.51943	2.21513
FBgn0032536	195.456	234.026	157.955	40.8192	67.7352	59.9328	195.812	56.1624	1.80752	1.40161e-11	3.18667e-10	Ance-3	2L	13914725	13956188	+	3426	protein_coding	-	Peptidase_M2	214	250	157	41	58	61	2.97118	3.48468	2.38052	0.628745	1.05134	0.923563
FBgn0063498	39.2739	61.7829	43.2614	23.8942	7.00709	9.82505	48.1061	13.5754	1.81286	0.000393169	0.0018267	GstE2	2R	18399486	18400375	+	890	protein_coding	-	GST_C	43	66	43	24	6	10	2.29816	3.54131	2.50979	1.41677	0.418664	0.58282
FBgn0030954	31.0538	27.147	19.1155	6.96914	8.17494	6.87754	25.7721	7.34054	1.81922	0.000937436	0.0038454	CCKLR-17D3	X	18764483	18774027	-	2230	protein_coding	-	7tm_1	34	29	19	7	7	7	0.725231	0.621017	0.442597	0.164919	0.194938	0.162824
FBgn0002576	56.6275	33.6998	49.2979	11.9471	12.8463	14.7376	46.5417	13.177	1.81929	2.53987e-05	0.000169624	lz	X	9284649	9303636	+	3468	protein_coding	-	Runt	62	36	49	12	11	15	0.850383	0.495717	0.733967	0.181794	0.196978	0.224355
FBgn0040262	91.3346	83.3133	88.5351	25.8854	24.5248	23.5801	87.7277	24.6634	1.83061	5.88474e-10	1.0599e-08	Ugt36Ba	2L	16794211	16796009	+	1799	protein_coding	-	UDPGT	100	89	88	26	21	24	2.64406	2.36249	2.54104	0.759312	0.724924	0.691997
FBgn0020258	19.1803	18.7221	18.1094	3.98237	7.00709	4.91253	18.6706	5.30066	1.83089	0.00349733	0.0115811	ppk	2L	14378218	14381172	-	2462	protein_coding	-	-	21	20	18	4	6	5	0.405727	0.387929	0.37979	0.0853592	0.151345	0.105343
FBgn0263080	217.376	132.927	229.386	91.5944	29.1962	41.2652	193.23	54.0186	1.83312	4.58625e-06	3.76269e-05	CG43348	2L	1199412	1199924	+	513	protein_coding	-	-	238	142	228	92	25	42	22.0679	13.2185	23.0875	9.42212	3.0264	4.24674
FBgn0039872	2559.2	3180.88	2534.32	822.358	778.955	714.281	2758.13	771.865	1.83746	4.70661e-45	1.23303e-42	salt	3R	31751825	31754705	-	2114	protein_coding	-	-	2802	3398	2519	826	667	727	63.0471	76.7589	61.8988	20.5283	19.5941	17.8383
FBgn0263402	18.2669	40.2525	27.1642	4.97796	8.17494	10.8076	28.5612	7.98682	1.83776	0.00163027	0.00607765	CG43448	3R	30237094	30237734	-	529	protein_coding	-	-	20	43	27	5	7	11	1.79836	3.88171	2.65135	0.496584	0.821763	1.0786
FBgn0030310	227.423	292.065	215.301	71.6826	49.0496	83.513	244.93	68.0817	1.84033	1.16185e-13	3.315e-12	PGRP-SA	X	11561643	11562779	+	1018	protein_coding	-	-	249	312	214	72	42	85	11.6347	14.6358	10.9201	3.71589	2.56216	4.33107
FBgn0038082	917.913	1351.74	1038.27	462.95	205.541	253.486	1102.64	307.326	1.84163	3.32188e-11	7.27972e-10	CG5724	3R	12739642	12741417	+	1710	protein_coding	-	UDPGT	1005	1444	1032	465	176	258	27.9558	40.3257	31.3504	14.2868	6.39177	7.82614
FBgn0050431	196.369	330.445	231.398	50.7752	70.0709	90.3905	252.738	70.4122	1.84328	1.20359e-10	2.39617e-09	CG30431	2R	6202725	6205224	+	1849	protein_coding	-	zf-AD	215	353	230	51	60	92	5.531	9.11692	6.46175	1.44914	2.0152	2.58092
FBgn0033787	2997.6	2896.31	2846.2	777.557	846.69	798.777	2913.37	807.674	1.85172	8.10446e-96	1.557e-92	CG13321	2R	12953112	12955712	+	2043	protein_coding	-	-	3282	3094	2829	781	725	813	76.4139	72.3206	71.9323	20.0845	22.0381	20.6417
FBgn0026268	239.297	249.94	230.392	42.8104	74.7423	81.5479	239.876	66.3669	1.85651	8.86005e-14	2.56608e-12	antdh	X	11168030	11169058	-	950	protein_coding	-	adh_short	262	267	229	43	64	83	13.1184	13.4214	12.5219	2.37806	4.1837	4.53188
FBgn0053110	416.486	468.989	399.414	126.44	100.435	126.743	428.296	117.873	1.85726	6.01207e-28	5.97423e-26	CG33110	3R	22570188	22580392	+	2005	protein_coding	-	ELO	456	501	397	127	86	129	10.8181	11.9326	10.2857	3.32788	2.66372	3.33733
FBgn0038731	305.971	264.918	260.575	88.6076	66.5673	73.6879	277.154	76.2876	1.85771	4.5244e-21	2.77408e-19	CG11659	3R	19775459	19777280	-	1705	protein_coding	-	AMP-binding	335	283	259	89	57	75	9.34593	7.92633	7.89105	2.74248	2.07613	2.28171
FBgn0038353	8535.22	8944.48	9168.41	3087.33	2008.7	2198.85	8882.7	2431.62	1.86877	6.84992e-31	8.31148e-29	CG5399	3R	15695241	15697142	+	1546	protein_coding	-	-	9345	9555	9113	3101	1720	2238	287.523	295.142	306.204	105.383	69.0913	75.0887
FBgn0063497	2476.08	2716.58	2566.51	724.79	750.926	645.506	2586.39	707.074	1.87194	7.17089e-72	5.16618e-69	GstE3	2R	18400713	18401467	+	755	protein_coding	-	GST_C	2711	2902	2551	728	643	657	170.799	183.553	175.518	50.6597	52.8894	45.138
FBgn0039298	788.218	891.172	790.779	295.691	200.87	176.851	823.39	224.47	1.874	1.61184e-21	1.00977e-19	to	3R	25240180	25241668	+	1253	protein_coding	-	-	863	952	786	297	172	180	32.7614	36.2824	32.586	12.4533	8.52475	7.45153
FBgn0266431	21.9203	31.8276	29.1763	14.9339	3.50354	3.93002	27.6414	7.45581	1.87487	0.00362118	0.0119295	CG45061	X	9871098	9871702	-	493	protein_coding	-	-	24	34	29	15	3	4	2.31562	3.29338	3.0557	1.59854	0.377901	0.42086
FBgn0031412	186.323	139.48	153.93	51.7707	35.0354	43.2302	159.911	43.3455	1.87762	3.88771e-13	1.06193e-11	CG16995	2L	2307948	2308872	+	721	protein_coding	-	SCP	204	149	153	52	30	44	13.4585	9.86873	11.0234	3.78919	2.58399	3.1655
FBgn0035359	325.151	384.739	362.189	65.709	100.435	123.796	357.36	96.6465	1.8868	5.42014e-16	1.98974e-14	CG1143	3L	2645368	2647192	+	1657	protein_coding	-	-	356	411	360	66	86	126	10.2195	11.8449	11.286	2.09266	3.22315	3.94432
FBgn0042627	4893.71	5846.91	4604.83	1123.03	1404.92	1617.2	5115.15	1381.72	1.88836	7.91562e-33	1.11272e-30	v(2)k05816	2L	3043947	3056143	+	8161	protein_coding	-	ketoacyl-synt	5358	6246	4577	1128	1203	1646	31.2292	36.5484	29.1338	7.2618	9.15433	10.4619
FBgn0013725	31.9671	45.8691	24.1459	6.96914	14.0142	6.87754	33.9941	9.28695	1.89218	0.00044114	0.00201307	phyl	2R	14427336	14432337	-	1839	protein_coding	-	-	35	49	24	7	12	7	0.905292	1.2724	0.677936	0.199984	0.405232	0.197442
FBgn0037122	21.9203	14.9777	21.1277	7.96473	3.50354	3.93002	19.3419	5.13277	1.90166	0.00368125	0.0120825	CG14570	3L	21729675	21730454	-	780	protein_coding	-	-	24	16	21	8	3	4	1.46359	0.97957	1.39857	0.538857	0.238853	0.266005
FBgn0038450	4514.67	5267.46	4829.18	1224.58	1270.62	1401.05	4870.44	1298.75	1.90671	3.74367e-72	2.87689e-69	CG17560	3R	16617950	16619878	+	1712	protein_coding	-	NAD_binding_4	4943	5627	4800	1230	1088	1426	137.337	156.958	145.645	37.7468	39.4666	43.2056
FBgn0265759	19.1803	17.786	16.0973	4.97796	0	8.84255	17.6878	4.60684	1.90811	0.0169833	0.0430066	CR44566	3L	17631390	17632253	+	864	lincRNA	-	-	21	19	16	5	0	9	1.15613	1.05015	0.961979	0.304043	0	0.540322
FBgn0050495	126.042	170.371	142.863	51.7707	25.6927	38.3177	146.425	38.5937	1.91429	1.2911e-10	2.55275e-09	CG30495	2R	7656895	7659061	+	1939	protein_coding	-	adh_short	138	182	142	52	22	39	3.38535	4.48233	3.80426	1.40898	0.704611	1.0433
FBgn0259977	218.29	247.132	189.143	66.7046	50.2175	56.0028	218.188	57.6416	1.91701	1.4122e-17	6.18954e-16	Tdc1	2R	6677001	6680391	-	2281	protein_coding	-	-	239	264	188	67	43	57	4.98396	5.52699	4.28146	1.54322	1.1707	1.29621
FBgn0000565	1679.64	2829.84	1775.73	403.214	557.063	702.491	2095.07	554.256	1.91836	3.335e-15	1.11752e-13	Eip71CD	3L	15511052	15513202	+	1354	protein_coding	-	PMSR	1839	3023	1765	405	477	715	64.6049	106.618	67.7151	15.715	21.8778	27.3912
FBgn0051004	4884.58	4565.38	4433.8	1343.05	1126.97	1176.06	4627.92	1215.36	1.92846	7.13178e-75	6.85067e-72	mesh	3R	31178389	31195762	-	5175	protein_coding	-	VWD	5348	4877	4407	1349	965	1197	49.1568	45.0042	44.2376	13.6956	11.5803	11.998
FBgn0025686	55.7141	54.2941	54.3283	12.9427	15.182	14.7376	54.7788	14.2874	1.94158	2.35396e-07	2.63437e-06	Amnionless	2L	287252	289144	-	1893	protein_coding	-	-	61	58	54	13	13	15	1.53279	1.46315	1.48184	0.360804	0.426478	0.411022
FBgn0033851	10.9602	15.9138	21.1277	3.98237	3.50354	4.91253	16.0005	4.13281	1.94266	0.00644759	0.0192792	CG13332	2R	13525377	13526448	+	1072	protein_coding	-	-	12	17	21	4	3	5	0.532462	0.757294	1.01762	0.196039	0.173792	0.241935
FBgn0033403	58.4542	76.7606	54.3283	13.9383	9.34278	25.5451	63.181	16.2754	1.94267	5.98124e-06	4.75289e-05	CG13739	2R	9309296	9351655	-	8117	protein_coding	-	-	64	82	54	14	8	26	0.375048	0.482424	0.345587	0.0906172	0.0612067	0.166151
FBgn0039821	379.039	406.269	357.158	112.502	99.2671	85.478	380.822	99.0823	1.94312	1.0159e-28	1.04556e-26	CG15556	3R	31127965	31130666	-	2643	protein_coding	-	7tm_2	415	434	355	113	85	87	7.46884	7.84157	6.97735	2.24626	1.99722	1.70744
FBgn0052750	59.3675	54.2941	46.2797	16.9251	10.5106	13.7551	53.3138	13.7303	1.94893	9.85801e-07	9.43798e-06	CG32750	X	6194737	6196439	-	1645	protein_coding	-	CN_hydrolase	65	58	46	17	9	14	1.87953	1.68373	1.45262	0.542952	0.339767	0.441455
FBgn0015721	21.007	26.2109	17.1034	5.97355	4.67139	5.89503	21.4404	5.51332	1.95417	0.00130334	0.00504657	ktub	2R	21101928	21123704	+	2523	protein_coding	-	Tub	23	28	17	6	4	6	0.433623	0.52997	0.350018	0.124943	0.0984571	0.123355
FBgn0035583	615.595	638.423	628.8	161.286	182.184	141.481	627.606	161.65	1.96091	2.74966e-42	6.6032e-40	CG13704	3L	4898900	4900869	+	682	protein_coding	-	-	674	682	625	162	156	144	47.0086	47.7541	47.6053	12.4798	14.2051	10.9522
FBgn0085223	61.1942	70.2079	60.3648	17.9206	16.3499	14.7376	63.9223	16.336	1.96897	3.06252e-08	4.14339e-07	CG34194	2R	17544190	17545045	+	655	protein_coding	-	-	67	75	60	18	14	15	4.86559	5.46802	4.75849	1.44381	1.32737	1.18788
FBgn0263314	28.3137	15.9138	17.1034	5.97355	5.83924	3.93002	20.4436	5.2476	1.96947	0.00229428	0.00808753	CG43400	2L	8490739	8491360	+	564	protein_coding	-	-	31	17	17	6	5	4	2.61448	1.4394	1.56577	0.558921	0.550548	0.367879
FBgn0036225	12.7868	17.786	14.0851	6.96914	2.3357	1.96501	14.886	3.75662	1.97317	0.0104675	0.0287283	CG5883	3L	11943640	11944852	-	1146	protein_coding	-	CBM_14	14	19	14	7	2	2	0.581093	0.791734	0.634604	0.320916	0.10838	0.0905252
FBgn0039225	11.8735	15.9138	13.079	5.97355	2.3357	1.96501	13.6221	3.42475	1.98023	0.0116195	0.0313453	Ets96B	3R	24788054	24797955	+	3213	protein_coding	-	Ets	13	17	13	6	2	2	0.192457	0.252667	0.21018	0.0981112	0.0386566	0.0322882
FBgn0038160	92.248	106.716	89.5411	22.8986	26.8605	23.5801	96.1684	24.4464	1.98053	2.49586e-11	5.53264e-10	CG9759	3R	13607078	13609246	-	2169	protein_coding	-	-	101	114	89	23	23	24	2.21495	2.5099	2.13152	0.557117	0.658525	0.573952
FBgn0030927	63.9342	80.505	64.3891	13.9383	26.8605	12.7726	69.6095	17.8571	1.98144	3.45887e-07	3.72015e-06	CG15046	X	18487450	18489620	-	1817	protein_coding	-	-	70	86	64	14	23	13	1.83251	2.26024	1.82972	0.40481	0.786099	0.371119
FBgn0085313	286.791	366.953	286.733	82.6341	71.2387	83.513	313.492	79.1286	1.98328	2.75752e-23	1.95006e-21	CG34284	3R	18902338	18902933	-	520	protein_coding	-	-	314	392	285	83	61	85	28.7229	35.9992	28.4709	8.38596	7.28502	8.47891
FBgn0039151	698.71	1128.01	737.457	124.449	228.898	294.752	854.724	216.033	1.98444	1.6338e-11	3.68549e-10	CG13607	3R	24114043	24116322	-	2212	protein_coding	-	-	765	1205	733	125	196	300	16.4505	26.0143	17.2139	2.96895	5.50269	7.03494
FBgn0035245	67.5876	104.844	82.4986	28.8721	16.3499	18.6676	84.9766	21.2965	1.98888	3.88339e-08	5.15712e-07	GC	3L	1623179	1629301	-	2685	protein_coding	-	VKG_Carbox	74	112	82	29	14	19	1.31096	1.99198	1.58646	0.567456	0.323808	0.367057
FBgn0015037	2389.31	2769.93	2573.55	859.195	537.21	542.343	2577.6	646.249	1.99509	2.70702e-26	2.40029e-24	Cyp4p1	2R	9240041	9242139	+	1680	protein_coding	-	p450	2616	2959	2558	863	460	552	74.068	84.1097	79.0953	26.9886	17.0041	17.0433
FBgn0034860	2149.1	2746.53	2293.86	482.862	666.841	649.436	2396.5	599.713	1.99935	9.80806e-36	1.63852e-33	CG9812	2R	23412320	23419684	-	1574	protein_coding	-	-	2353	2934	2280	485	571	661	71.1081	89.0155	75.247	16.1888	22.5287	21.7832
FBgn0020414	3676.22	4169.41	3889.51	1073.25	861.872	971.698	3911.71	968.939	2.01238	1.24932e-67	7.20046e-65	Idgf3	2L	16450907	16455194	+	3954	protein_coding	-	-	4025	4454	3866	1078	738	989	48.4207	53.7928	50.7907	14.3239	11.5911	12.9743
FBgn0032140	354.378	359.464	433.621	96.5724	78.2458	108.076	382.488	94.2979	2.01439	4.31851e-26	3.79996e-24	CG13117	2L	9736645	9737949	+	1305	protein_coding	-	-	388	384	431	97	67	110	14.1424	14.0518	17.1564	3.90517	3.18837	4.37226
FBgn0037726	84.0279	108.588	92.5594	27.8766	26.8605	15.7201	95.0585	23.4857	2.02313	7.96389e-10	1.40797e-08	CG9492	3R	9651179	9674643	-	14650	protein_coding	-	Dynein_heavy	92	116	92	28	23	16	0.298712	0.378121	0.326219	0.100415	0.0974977	0.0566509
FBgn0033405	22.8337	33.6998	16.0973	5.97355	8.17494	3.93002	24.2102	6.02617	2.02323	0.00121113	0.00476962	CG13954	2R	9309296	9389467	-	7700	protein_coding	-	-	25	36	16	6	7	4	0.154437	0.223266	0.107942	0.0409391	0.0564562	0.026946
FBgn0039818	167.142	154.457	146.888	39.8237	40.8747	34.3877	156.162	38.362	2.02886	2.24339e-17	9.5776e-16	CG11318	3R	31106362	31109191	-	2764	protein_coding	-	7tm_2	183	165	146	40	35	35	3.14931	2.85073	2.74394	0.760327	0.786383	0.656832
FBgn0040093	33.7938	29.0192	44.2675	7.96473	9.34278	8.84255	35.6935	8.71669	2.03485	3.14319e-05	0.00020493	lectin-46Ca	2R	9817300	9818535	+	1105	protein_coding	-	Lectin_C	37	31	44	8	8	9	1.59273	1.33971	2.06847	0.38037	0.449606	0.422478
FBgn0041184	799.178	749.82	709.287	176.22	182.184	183.729	752.762	180.711	2.05907	2.3805e-56	9.14668e-54	Socs36E	2L	18138675	18152417	-	3503	protein_coding	-	SH2	875	801	705	177	156	187	11.8815	10.9195	10.4546	2.65468	2.7656	2.76902
FBgn0260429	25.5737	18.7221	13.079	4.97796	7.00709	1.96501	19.1249	4.65002	2.06464	0.00350299	0.0115965	CG42524	2R	15613854	15657214	+	2407	protein_coding	-	-	28	20	13	5	6	2	0.55333	0.396793	0.280561	0.109137	0.154803	0.0431001
FBgn0261561	80.3745	89.8661	75.456	16.9251	22.1891	19.6501	81.8989	19.5881	2.07	1.92826e-10	3.7107e-09	CG42675	3R	5813609	5818820	+	2744	protein_coding	-	-	88	96	75	17	19	20	1.52546	1.6707	1.41983	0.325494	0.430005	0.378068
FBgn0038354	123.302	131.991	108.657	34.8457	21.0213	29.4752	121.316	28.4474	2.08315	5.01586e-13	1.3446e-11	CG5404	3R	15704676	15708434	+	2762	protein_coding	-	Sulfate_transp	135	141	108	35	18	30	2.32494	2.43784	2.03123	0.665768	0.404719	0.563406
FBgn0042086	320.585	234.962	285.727	41.8148	72.4066	84.4955	280.425	66.239	2.08343	1.00151e-14	3.18028e-13	Tsp42Eb	2R	6998848	6999848	+	865	protein_coding	-	Tetraspannin	351	251	284	42	62	86	19.3016	13.857	17.0554	2.55101	4.45123	5.15711
FBgn0264788	18.2669	17.786	18.1094	5.97355	7.00709	0	18.0541	4.32688	2.08479	0.00938293	0.0262681	CR44018	3R	10639279	10645773	+	6412	lincRNA	-	-	20	19	18	6	6	0	0.148367	0.141505	0.145827	0.0491627	0.0581115	0
FBgn0029769	1233.93	1459.39	1223.39	319.585	294.298	307.524	1305.57	307.136	2.08699	2.20595e-60	1.01712e-57	frma	X	5493014	5496052	-	2975	protein_coding	-	-	1351	1559	1216	321	252	313	21.6008	25.0247	21.2327	5.66887	5.26039	5.45735
FBgn0038238	34.7072	25.2748	33.2006	6.96914	5.83924	8.84255	31.0609	7.21698	2.09636	6.17965e-05	0.000372991	CG14854	3R	14559166	14560054	-	663	protein_coding	-	-	38	27	33	7	5	9	2.72629	1.94474	2.58559	0.554706	0.468339	0.704131
FBgn0024361	1179.13	1266.55	1297.84	319.585	266.269	285.909	1247.84	290.588	2.10031	6.07072e-67	3.33225e-64	Tsp2A	X	1346553	1348143	+	1037	protein_coding	-	Tetraspannin	1291	1353	1290	321	228	291	59.2174	62.3059	64.6205	16.2631	13.654	14.5559
FBgn0033204	704.19	925.808	695.201	179.206	212.548	151.306	775.066	181.02	2.10144	1.0089e-29	1.10757e-27	CG2065	2R	7663786	7665269	+	1233	protein_coding	-	adh_short	771	989	691	180	182	154	29.7436	38.3039	29.1122	7.66986	9.16669	6.47861
FBgn0063923	510.561	488.647	494.991	150.334	96.9314	98.2505	498.066	115.172	2.10925	2.25379e-27	2.11215e-25	Kaz1-ORFB	3L	216625	218058	+	1276	protein_coding	-	-	559	522	492	151	83	100	20.8383	19.5358	20.0297	6.21734	4.03954	4.06512
FBgn0053337	31.0538	22.4665	13.079	5.97355	2.3357	6.87754	22.1998	5.06226	2.11471	0.00195136	0.00708452	CG33337	3R	23590141	23592769	-	2127	protein_coding	-	-	34	24	13	6	2	7	0.76035	0.538833	0.317494	0.148205	0.0583938	0.170708
FBgn0033437	300.491	346.359	291.763	84.6253	58.3924	71.7229	312.871	71.5802	2.12231	7.97649e-26	6.76066e-24	CG12926	2R	9608128	9610290	-	1347	protein_coding	-	-	329	370	290	85	50	73	11.618	13.1173	11.1838	3.31535	2.30519	2.81112
FBgn0052105	15.5269	14.0416	11.0669	1.99118	2.3357	4.91253	13.5451	3.0798	2.12591	0.00725941	0.0212816	CG32105	3L	12329232	12335901	+	2643	protein_coding	-	Homeobox	17	15	11	2	2	5	0.305952	0.271022	0.2162	0.0397568	0.0469934	0.0981289
FBgn0013710	24.6604	26.2109	18.1094	4.97796	7.00709	3.93002	22.9936	5.30502	2.13264	0.000482431	0.00217992	mt:tRNA:Y	dmel_mitochondrion_genome	1403	1468	-	66	tRNA	-	-	27	28	18	5	6	4	19.4591	20.2593	14.1673	3.98019	5.64562	3.14369
FBgn0020880	8.22012	21.5304	16.0973	1.99118	3.50354	4.91253	15.2826	3.46908	2.13694	0.00736128	0.0215146	CG7179	2L	7775804	7778029	-	2226	protein_coding	-	CUB	9	23	16	2	3	5	0.192318	0.493416	0.373383	0.0472045	0.0836952	0.116512
FBgn0033932	37.4472	37.4442	26.1581	7.96473	8.17494	6.87754	33.6832	7.6724	2.13945	2.53444e-05	0.000169359	Dh44-R1	2R	14378097	14385359	+	2475	protein_coding	-	7tm_2	41	40	26	8	7	7	0.787972	0.771783	0.545704	0.169822	0.175641	0.146706
FBgn0045759	21.007	19.6582	15.0912	0.995591	4.67139	6.87754	18.5855	4.18151	2.15604	0.00322257	0.0108299	bin	3L	6990622	6994447	+	2412	protein_coding	-	Fork_head	23	21	15	1	4	7	0.453579	0.415769	0.323053	0.0217822	0.102988	0.150538
FBgn0010414	145.222	147.905	115.699	28.8721	26.8605	35.3702	136.275	30.3676	2.16197	3.16477e-15	1.06559e-13	SerT	2R	24404595	24411074	-	3725	protein_coding	-	SNF	159	158	115	29	23	36	2.03036	2.02554	1.60373	0.409025	0.383447	0.501303
FBgn0033782	259.39	520.474	234.417	70.687	75.9101	79.5829	338.094	75.3933	2.1653	5.79965e-12	1.38987e-10	sug	2R	12924567	12930644	+	1572	protein_coding	-	zf-C2H2	284	556	233	71	65	81	8.59346	16.8901	7.6995	2.37293	2.56782	2.67274
FBgn0032652	321.498	537.324	347.098	116.484	91.0921	60.9153	401.973	89.4972	2.16792	2.24026e-14	6.86795e-13	CG6870	2L	17591315	17592299	-	985	protein_coding	-	-	352	574	345	117	78	62	16.9984	27.8283	18.1946	6.24062	4.91771	3.26497
FBgn0050160	65.7609	68.3357	72.4378	8.96032	15.182	21.6151	68.8448	15.2525	2.1724	2.49345e-08	3.45042e-07	CG30160	2R	7005157	7006136	+	844	protein_coding	-	Tetraspannin	72	73	72	9	13	22	4.05781	4.13039	4.43149	0.560245	0.956544	1.35209
FBgn0010043	209.156	223.729	170.028	48.784	40.8747	40.2827	200.971	43.3138	2.21313	1.41689e-20	8.24876e-19	GstD7	3R	12378500	12379255	+	756	protein_coding	-	GST_N	229	239	169	49	35	41	14.4084	15.0969	11.6125	3.40528	2.87508	2.81311
FBgn0039161	25.5737	51.4858	34.2067	7.96473	5.83924	9.82505	37.0887	7.87634	2.22443	3.30956e-05	0.000214563	CG13606	3R	24172628	24184144	+	1441	protein_coding	-	-	28	55	34	8	5	10	0.924264	1.82267	1.22567	0.291678	0.215482	0.359965
FBgn0052187	11.8735	13.1055	14.0851	0	2.3357	5.89503	13.0214	2.74358	2.23696	0.0156173	0.0401473	CG32187	3L	17804916	17806365	-	1326	protein_coding	-	-	13	14	14	0	2	6	0.466339	0.504191	0.548459	0	0.0936679	0.23471
FBgn0031805	174.449	244.323	227.374	26.881	51.3853	58.9503	215.382	45.7389	2.23749	7.44024e-14	2.17674e-12	CG9505	2L	6367882	6370190	+	2309	protein_coding	-	-	191	261	226	27	44	60	3.9347	5.39793	5.08445	0.614353	1.1834	1.34788
FBgn0032381	1598.36	1048.44	1648.97	416.157	225.395	255.451	1431.92	299.001	2.25828	1.7919e-19	9.30416e-18	Mal-B1	2L	11847226	11849169	+	1814	protein_coding	-	-	1750	1120	1639	418	193	260	45.8884	29.4843	46.9355	12.1065	6.6073	7.43465
FBgn0030272	511.474	594.427	523.162	87.612	131.967	118.883	543.021	112.821	2.2713	2.36276e-35	3.78271e-33	CG15201	X	11144120	11144809	+	489	protein_coding	-	-	560	635	520	88	113	121	54.473	62.0119	55.24	9.45479	14.3507	12.8351
FBgn0083945	133.349	189.093	150.912	41.8148	31.5319	24.5626	157.785	32.6365	2.27292	6.36985e-15	2.07416e-13	CG34109	2L	10094088	10125736	+	2551	protein_coding	-	-	146	202	150	42	27	25	2.72235	3.78139	3.0545	0.865002	0.657291	0.508339
FBgn0029167	779.084	716.12	660.995	153.321	110.946	178.816	718.733	147.694	2.27777	6.40521e-35	1.01141e-32	Hml	3L	13846054	13860001	+	11756	protein_coding	-	VWD	853	765	657	154	95	182	3.45137	3.10751	2.90312	0.688239	0.501843	0.803038
FBgn0038658	10751.9	12268.6	11053.8	2330.68	2256.28	2438.58	11358.1	2341.85	2.27779	8.53955e-134	2.46089e-130	CG14292	3R	18904933	18905655	-	648	protein_coding	-	-	11772	13106	10987	2341	1932	2482	864.127	965.841	880.772	189.804	185.155	198.679
FBgn0035873	18.2669	10.2972	19.1155	0.995591	8.17494	0.982505	15.8932	3.38434	2.28255	0.0111818	0.030351	CG13670	3L	8320763	8322280	+	960	protein_coding	-	Chitin_bind_4	20	11	19	1	7	1	0.990971	0.547182	1.02811	0.0547277	0.452826	0.0540322
FBgn0034264	10.9602	15.9138	19.1155	3.98237	3.50354	1.96501	15.3298	3.15031	2.28672	0.00299779	0.0101754	CG10933	2R	17723309	17725056	+	1402	protein_coding	-	SH3_1	12	17	19	4	3	2	0.407132	0.579044	0.703987	0.149896	0.132885	0.0739957
FBgn0037166	980.021	966.06	972.88	204.096	176.345	214.186	972.987	198.209	2.2919	3.07223e-74	2.52954e-71	CG11426	3L	22470556	22473509	+	1882	protein_coding	-	-	1073	1032	967	205	151	218	27.1195	26.1861	26.6911	5.72285	4.98266	6.00843
FBgn0265084	10.0468	20.5943	16.0973	2.98677	2.3357	3.93002	15.5795	3.08416	2.3238	0.00284254	0.00974308	CG44195	3L	7658409	7695654	-	6153	protein_coding	-	-	11	22	16	3	2	4	0.085037	0.170744	0.13508	0.0256161	0.0201859	0.0337208
FBgn0035358	440.233	567.28	585.539	92.59	121.456	104.146	531.017	106.064	2.32713	8.40335e-35	1.30899e-32	CG14949	3L	2642184	2643424	-	934	protein_coding	-	-	482	606	582	93	104	106	24.5472	30.9839	32.3695	5.23136	6.91498	5.88685
FBgn0037485	969.974	1186.98	1043.31	197.127	220.723	219.099	1066.75	212.316	2.32982	9.61764e-64	4.93615e-61	CG14606	3R	7214339	7217083	-	1925	protein_coding	-	Sugar_tr	1062	1268	1037	198	189	223	26.2419	31.4557	27.9838	5.40397	6.09727	6.00895
FBgn0028519	1834	1335.82	1892.44	379.32	309.48	316.367	1687.42	335.056	2.33145	4.55877e-43	1.14237e-40	CG4500	2L	14027001	14029368	+	2206	protein_coding	-	AMP-binding	2008	1427	1881	381	265	322	43.2973	30.8908	44.2938	9.07398	7.4601	7.57137
FBgn0021738	14.6135	22.4665	14.0851	3.98237	0	5.89503	17.0551	3.29247	2.33323	0.00461805	0.0146767	Crg-1	X	3793223	3797339	+	1230	protein_coding	-	-	16	24	14	4	0	6	0.618753	0.931787	0.591265	0.170857	0	0.253029
FBgn0053696	21.007	34.6359	18.1094	5.97355	3.50354	4.91253	24.5841	4.79654	2.34748	0.000254383	0.00126774	CNMaR	3L	9644109	9659433	+	2704	protein_coding	-	7tm_1	23	37	18	6	3	5	0.404598	0.653439	0.3458	0.11658	0.0688999	0.0959152
FBgn0039850	18.2669	38.3803	24.1459	0.995591	8.17494	6.87754	26.931	5.34935	2.34958	0.000800176	0.00334796	CG11333	3R	31463301	31464134	+	715	protein_coding	-	Isochorismatase	20	41	24	1	7	7	1.33053	2.73834	1.74367	0.0734805	0.60799	0.507828
FBgn0010651	1328.01	1623.21	1412.54	275.779	273.276	306.542	1454.58	285.199	2.34959	1.31537e-71	8.91901e-69	l(2)08717	2R	18796975	18803727	-	3288	protein_coding	-	MFS_1	1454	1734	1404	277	234	312	21.0346	25.1842	22.1817	4.42615	4.41965	4.92206
FBgn0010241	1560.91	1733.67	1669.09	391.267	297.801	283.944	1654.55	324.338	2.34975	4.80446e-58	1.97789e-55	Mdr50	2R	14246966	14252597	+	4256	protein_coding	-	ABC_membrane	1709	1852	1659	393	255	289	19.1004	20.7802	20.249	4.85142	3.72086	3.52225
FBgn0264961	9.13346	14.9777	13.079	1.99118	2.3357	2.94752	12.3967	2.4248	2.35031	0.00558373	0.0171499	CR44130	2R	6047170	6047738	-	569	lincRNA	-	-	10	16	13	2	2	3	0.835968	1.34282	1.18684	0.18467	0.218284	0.273485
FBgn0053542	32.8805	36.5081	20.1216	0.995591	4.67139	11.7901	29.8367	5.81902	2.3508	0.000933077	0.0038317	upd3	X	18277233	18284596	+	2221	protein_coding	-	-	36	39	20	1	4	12	0.771003	0.838545	0.467779	0.0236554	0.111845	0.280257
FBgn0264295	99.5548	45.8691	116.705	20.9074	18.6856	11.7901	87.3764	17.1277	2.3532	1.82001e-07	2.08541e-06	CG43773	2L	4007690	4007984	+	295	protein_coding	-	-	109	49	116	21	16	12	17.5755	7.93203	20.4266	3.74003	3.36823	2.11001
FBgn0264987	56.6275	133.863	141.857	29.8677	9.34278	24.5626	110.783	21.2577	2.36893	6.51205e-07	6.52734e-06	CR44138	3R	13376903	13377395	+	493	lincRNA	-	-	62	143	141	30	8	25	5.98201	13.8516	14.857	3.19707	1.00774	2.63037
FBgn0033215	105.948	205.007	122.742	25.8854	33.8676	24.5626	144.566	28.1052	2.36911	9.04331e-12	2.11017e-10	CG1942	2R	7712578	7714182	+	1305	protein_coding	-	-	116	219	122	26	29	25	4.22814	8.0139	4.85634	1.04675	1.38004	0.993696
FBgn0040609	102.295	131.991	86.5229	18.9162	26.8605	16.7026	106.936	20.8264	2.37262	2.85987e-12	7.12002e-11	CG3348	3R	27291535	27292209	-	543	protein_coding	-	-	112	141	86	19	23	17	9.81116	12.4002	8.22731	1.83837	2.63046	1.62395
FBgn0262843	18.2669	27.147	33.2006	1.99118	9.34278	3.93002	26.2049	5.088	2.39652	0.00036095	0.00169962	CG43207	2R	23152748	23153318	+	455	protein_coding	-	-	20	29	33	2	8	4	2.09084	3.04367	3.76757	0.230939	1.0919	0.456008
FBgn0031461	438.406	679.612	623.77	108.519	124.96	95.303	580.596	109.594	2.4081	1.84101e-29	2.00201e-27	daw	2L	2805261	2812376	+	3265	protein_coding	-	TGFb_propeptide	480	726	620	109	107	97	6.99295	10.6185	9.86434	1.75397	2.03519	1.54104
FBgn0051528	8.22012	16.8499	14.0851	2.98677	3.50354	0.982505	13.0517	2.49094	2.40868	0.00581914	0.0177453	CG31528	3R	4416438	4417665	+	1228	protein_coding	-	ubiquitin	9	18	14	3	3	1	0.348615	0.699978	0.592228	0.128352	0.151715	0.0422402
FBgn0266822	21.9203	38.3803	19.1155	1.99118	3.50354	8.84255	26.472	4.77909	2.45802	0.000410092	0.00189388	CR45284	2L	14032006	14038306	-	6301	lincRNA	-	-	24	41	19	2	3	9	0.181177	0.310731	0.15664	0.0166763	0.0295676	0.0740896
FBgn0034047	10.0468	20.5943	10.0608	0.995591	3.50354	2.94752	13.5673	2.48222	2.46911	0.00505176	0.0158024	CG12970	2R	15855961	15857522	+	1137	protein_coding	-	-	11	22	10	1	3	3	0.460187	0.924001	0.456877	0.0462081	0.163857	0.136863
FBgn0034289	783.651	1172	878.308	196.131	154.156	154.253	944.654	168.18	2.48855	2.45321e-37	4.41847e-35	CG10910	2R	18020268	18022406	+	1991	protein_coding	-	-	858	1252	873	197	132	157	20.4983	30.0292	22.7773	5.19844	4.11725	4.09028
FBgn0005664	497.774	366.953	446.7	72.6782	72.4066	86.4605	437.142	77.1817	2.49963	6.3471e-37	1.12559e-34	Cry	2L	11944129	11947131	+	2261	protein_coding	-	Chitin_bind_4	545	392	444	73	62	88	11.4656	8.27934	10.201	1.69629	1.70292	2.01886
FBgn0013772	1011.07	1217.87	1073.49	250.889	174.009	158.183	1100.81	194.361	2.50037	6.25315e-41	1.36e-38	Cyp6a8	2R	14887171	14889010	-	1781	protein_coding	-	p450	1107	1301	1067	252	149	161	29.5655	34.8838	31.1214	7.43387	5.19549	4.68906
FBgn0032281	25.5737	6.55273	10.0608	1.99118	3.50354	1.96501	14.0624	2.48658	2.52	0.0067076	0.0199172	CG17107	2L	10681902	10682528	+	627	protein_coding	-	-	28	7	10	2	3	2	2.12419	0.533139	0.828499	0.167587	0.297138	0.165458
FBgn0002563	539.788	129.182	162.985	25.8854	74.7423	44.2127	277.318	48.2801	2.52447	0.000928312	0.00381485	Lsp1beta	2L	898500	901316	+	2749	protein_coding	-	-	591	138	162	26	64	45	10.2262	2.39726	3.06126	0.496909	1.4458	0.849106
FBgn0050484	17.3536	16.8499	14.0851	1.99118	2.3357	3.93002	16.0962	2.7523	2.54003	0.000979313	0.00399312	CG30484	2R	13846393	13849832	+	3274	protein_coding	-	-	19	18	14	2	2	4	0.276043	0.262545	0.222131	0.0320944	0.0379364	0.0633732
FBgn0031808	102.295	97.3549	111.675	13.9383	19.8534	18.6676	103.775	17.4864	2.57462	7.13354e-16	2.57769e-14	CG9507	2L	6381266	6383419	+	2154	protein_coding	-	-	112	104	111	14	17	19	2.47329	2.30567	2.67693	0.341476	0.490126	0.457543
FBgn0264775	142.482	175.988	167.009	42.8104	17.5177	19.6501	161.826	26.6594	2.5918	2.02467e-14	6.27375e-13	CG44013	3R	15508896	15509917	-	940	protein_coding	-	-	156	188	166	43	15	20	7.89403	9.55081	9.17359	2.40336	0.990986	1.10364
FBgn0005660	93.1613	80.505	94.5715	17.9206	14.0142	11.7901	89.4126	14.575	2.61566	5.35511e-14	1.58685e-12	Ets21C	2L	544925	552923	-	5407	protein_coding	-	Ets	102	86	94	18	12	12	0.897317	0.759543	0.90309	0.174902	0.137825	0.11512
FBgn0259716	576.322	561.663	551.332	107.524	85.2529	81.5479	563.105	91.4416	2.62046	2.87246e-58	1.22633e-55	CG42370	2L	6383435	6385512	-	2078	protein_coding	-	-	631	600	548	108	73	83	14.4439	13.7885	13.6992	2.73059	2.18163	2.07184
FBgn0063499	321.498	409.078	317.921	51.7707	54.8889	62.8803	349.499	56.5133	2.62752	6.05949e-36	1.02717e-33	GstE10	2R	18396638	18398519	-	1134	protein_coding	-	-	352	437	316	52	47	64	14.7649	18.4026	14.4755	2.40918	2.57388	2.92746
FBgn0266406	26.487	34.6359	25.152	1.99118	3.50354	7.86004	28.7583	4.45159	2.67978	2.8565e-05	0.000187832	CR45046	3R	21878672	21884101	-	5273	lincRNA	-	Aldedh	29	37	25	2	3	8	0.261603	0.335084	0.246287	0.0199274	0.035332	0.0786967
FBgn0264870	25.5737	47.7413	34.2067	5.97355	7.00709	3.93002	35.8406	5.63689	2.68045	2.95722e-06	2.53305e-05	CR44061	2L	912981	913305	-	325	lincRNA	-	-	28	51	34	6	6	4	4.09805	7.49371	5.43444	0.969943	1.14649	0.638412
FBgn0038140	12.7868	13.1055	8.04864	1.99118	1.16785	1.96501	11.3137	1.70801	2.71369	0.00429157	0.0137643	PK2-R1	3R	13338330	13345106	+	2752	protein_coding	-	7tm_1	14	14	8	2	1	2	0.241981	0.242935	0.151008	0.0381821	0.0225661	0.0376969
FBgn0036044	15.5269	21.5304	18.1094	2.98677	3.50354	1.96501	18.3889	2.81844	2.71917	0.00027997	0.00137095	Zasp67	3L	9787933	9797687	-	3248	protein_coding	-	PDZ	17	23	18	3	3	2	0.248963	0.33816	0.287883	0.048527	0.05736	0.0319402
FBgn0263406	5.48008	12.1694	10.0608	1.99118	1.16785	0.982505	9.23675	1.38051	2.73414	0.010691	0.029265	CR43452	3R	20678183	20679079	+	897	lincRNA	-	-	6	13	10	2	1	1	0.318171	0.692088	0.579118	0.117143	0.0692328	0.0578272
FBgn0031033	127.868	94.5466	116.705	21.903	16.3499	11.7901	113.04	16.681	2.76082	7.29388e-16	2.62739e-14	CG14219	X	19587348	19590170	-	2308	protein_coding	-	-	140	101	116	22	14	12	2.88532	2.08976	2.61085	0.500801	0.376701	0.269693
FBgn0031542	16.4402	18.7221	7.04256	4.97796	0	0.982505	14.0683	1.98682	2.78838	0.00637866	0.0191128	CG15414	2L	3480755	3491071	-	1402	protein_coding	-	-	18	20	7	5	0	1	0.610698	0.681228	0.259364	0.18737	0	0.0369978
FBgn0052553	9.13346	19.6582	15.0912	1.99118	2.3357	1.96501	14.6276	2.0973	2.80692	0.00131725	0.00508846	CG32553	X	18124575	18127027	-	1066	protein_coding	-	-	10	21	15	2	2	2	0.446216	0.940746	0.73096	0.0985714	0.116514	0.0973189
FBgn0038451	13.7002	12.1694	11.0669	2.98677	2.3357	0	12.3121	1.77416	2.81539	0.00363029	0.0119527	CG14893	3R	16620778	16622702	+	1688	protein_coding	-	NAD_binding_4	15	13	11	3	2	0	0.422689	0.367774	0.338516	0.0933742	0.0735803	0
FBgn0032706	1263.16	1656.91	1334.06	203.101	161.163	233.836	1418.04	199.367	2.82699	9.04489e-59	4.01002e-56	Irk3	2L	18711071	18713748	-	2096	protein_coding	-	-	1383	1770	1326	204	138	238	31.3858	40.3267	32.8633	5.11349	4.08876	5.88993
FBgn0264994	56.6275	83.3133	117.711	20.9074	7.00709	7.86004	85.8841	11.9248	2.83489	7.68475e-09	1.15794e-07	CR44145	2L	11736402	11737541	+	1071	lincRNA	-	-	62	89	117	21	6	8	2.75362	3.96836	5.67487	1.03017	0.347909	0.387458
FBgn0034160	409.179	400.653	277.678	55.7531	32.6997	62.8803	362.503	50.4444	2.83613	4.53248e-26	3.95803e-24	CG5550	2R	16816589	16817577	+	938	protein_coding	-	Fibrinogen_C	448	428	276	56	28	64	22.7184	21.7897	15.285	3.13663	1.85379	3.53917
FBgn0036348	9.13346	23.4026	14.0851	3.98237	1.16785	0.982505	15.5404	2.04424	2.90851	0.00159908	0.00597829	CG17687	3L	13349165	13354940	+	4812	protein_coding	-	-	10	25	14	4	1	1	0.09885	0.248099	0.151134	0.043673	0.0129056	0.0107795
FBgn0031375	22.8337	18.7221	21.1277	0.995591	0	6.87754	20.8945	2.62438	2.94706	0.000701582	0.00299523	erm	2L	1950239	1970362	-	3291	protein_coding	-	-	25	20	21	1	0	7	0.361339	0.29021	0.331475	0.0159643	0	0.11033
FBgn0029898	753.511	925.808	656.97	82.6341	95.7635	121.831	778.763	100.076	2.9589	1.74723e-48	5.59454e-46	CG14439	X	6747544	6755752	+	2428	protein_coding	-	MFS_1	825	989	653	83	82	124	16.1625	19.4517	13.9709	1.79601	2.09734	2.64909
FBgn0030477	7.30677	21.5304	5.0304	2.98677	1.16785	0	11.2892	1.38487	3.02592	0.0104819	0.0287541	dmrt11E	X	13368191	13370472	+	1282	protein_coding	-	DM	8	23	5	3	1	0	0.296827	0.856742	0.202601	0.122945	0.0484414	0
FBgn0036575	22.8337	25.2748	20.1216	2.98677	2.3357	2.94752	22.7434	2.75666	3.03686	2.02898e-05	0.000140561	CG5157	3L	16136487	16137879	-	1393	protein_coding	-	-	25	27	20	3	2	3	0.853672	0.925599	0.745827	0.113148	0.0891627	0.111711
FBgn0053234	2.74004	16.8499	7.04256	0.995591	0	1.96501	8.8775	0.986867	3.12018	0.0173377	0.0437888	CG33234	3L	2661622	2663622	+	1523	protein_coding	-	MFS_1	3	18	7	1	0	2	0.0936965	0.564395	0.238758	0.0344968	0	0.0681168
FBgn0052181	6.39342	14.9777	6.03648	1.99118	1.16785	0	9.13586	1.05301	3.12813	0.010367	0.0284999	CG32181	3L	17759697	17762904	+	2276	protein_coding	-	-	7	16	6	2	1	0	0.146294	0.335705	0.136943	0.0461675	0.0272855	0
FBgn0033302	1564.56	1977.99	1575.52	226.995	186.856	169.973	1706.02	194.608	3.13147	1.12701e-83	1.62387e-80	Cyp6a14	2R	8564187	8567202	-	2959	protein_coding	-	p450	1713	2113	1566	228	160	173	27.5369	34.1008	27.492	4.04826	3.35799	3.03267
FBgn0004431	37.4472	53.358	45.2736	5.97355	2.3357	6.87754	45.3596	5.06226	3.13484	8.93928e-09	1.33649e-07	LysX	3L	1194739	1195302	-	564	protein_coding	-	-	41	57	45	6	2	7	3.45786	4.82621	4.1447	0.558921	0.220219	0.643788
FBgn0052279	38.3605	43.0608	41.2493	1.99118	4.67139	6.87754	40.8902	4.51337	3.17878	2.38344e-08	3.31218e-07	Drsl2	3L	3314349	3314681	+	333	protein_coding	-	-	42	46	41	2	4	7	5.99939	6.59666	6.39586	0.315547	0.745968	1.09038
FBgn0031302	5.48008	14.0416	9.05472	0.995591	1.16785	0.982505	9.52546	1.04865	3.189	0.00596385	0.0180909	CG14340	2L	1112941	1114138	+	1030	protein_coding	-	-	6	15	9	1	1	1	0.277087	0.695447	0.453905	0.0510083	0.060293	0.0503602
FBgn0036727	1108.8	1303.99	1356.2	185.18	103.938	122.813	1256.33	137.311	3.18945	9.91507e-55	3.68681e-52	CG7589	3L	17470127	17474517	+	2249	protein_coding	-	Neur_chan_LBD	1214	1393	1348	186	89	125	25.6762	29.5782	31.1358	4.34512	2.45756	2.883
FBgn0031520	657.609	805.05	720.353	85.6209	60.7281	77.6179	727.671	74.6556	3.27802	8.70358e-75	7.7174e-72	CG8837	2L	3320245	3323141	+	1838	protein_coding	-	Sugar_tr	720	860	716	86	52	79	18.6333	22.3441	20.2361	2.45828	1.75696	2.22949
FBgn0031778	11.8735	14.9777	4.02432	0.995591	1.16785	0.982505	10.2918	1.04865	3.30503	0.00500241	0.015665	CR9162	2L	6078453	6079736	+	1239	lincRNA	-	-	13	16	4	1	1	1	0.499085	0.616679	0.167706	0.042404	0.0501225	0.0418652
FBgn0022700	847.585	705.823	667.031	80.6429	52.5532	73.6879	740.147	68.9613	3.41607	1.42346e-68	8.63592e-66	Cht4	2R	21065379	21067087	-	1473	protein_coding	-	CBM_14	928	754	663	81	45	75	29.9673	24.4444	23.3814	2.88909	1.8972	2.64109
FBgn0034711	2885.26	3586.22	3193.3	231.973	279.116	362.544	3221.59	291.211	3.46688	8.47354e-91	1.39535e-87	CG3290	2R	22206005	22207987	-	1762	protein_coding	-	-	3159	3831	3174	233	239	369	85.2797	103.828	93.5751	6.9475	8.42357	10.8629
FBgn0051272	1652.24	2017.31	1930.67	210.07	120.288	164.078	1866.74	164.812	3.49695	4.82495e-76	5.05611e-73	CG31272	3R	10756296	10759398	-	2102	protein_coding	-	MFS_1	1809	2155	1919	211	103	167	40.9362	48.9581	47.4244	5.27385	3.04305	4.12105
FBgn0031801	5123.87	5763.6	5218.54	464.941	457.796	486.34	5368.67	469.693	3.5142	3.15846e-271	3.64076e-267	CG9498	2L	6349393	6351034	-	1514	protein_coding	-	-	5610	6157	5187	467	392	495	176.254	194.202	177.971	16.2058	16.0792	16.9591
FBgn0039091	331.545	440.905	246.49	34.8457	25.6927	23.5801	339.647	28.0395	3.59658	1.40667e-33	2.07881e-31	CG10182	3R	23587120	23589819	-	2212	protein_coding	-	-	363	471	245	35	22	24	7.80591	10.1682	5.75361	0.831307	0.617649	0.562795
FBgn0035176	3557.48	4444.63	3976.03	416.157	219.555	332.087	3992.71	322.6	3.62697	6.29266e-70	4.02975e-67	CG13905	3L	902898	903810	+	913	protein_coding	-	-	3895	4748	3952	418	188	338	202.927	248.342	224.857	24.0538	12.7877	19.203
FBgn0034850	5.48008	5.61663	5.0304	0	0	0.982505	5.3757	0.327502	3.84381	0.0161856	0.0412825	CG9875	2R	23357660	23358508	+	730	protein_coding	-	-	6	6	5	0	0	1	0.390958	0.392499	0.3558	0	0	0.0710561
FBgn0085256	23.747	4.68052	4.02432	0.995591	1.16785	0	10.8173	0.721146	3.94768	0.00598508	0.0181505	CG34227	2R	11248126	11248610	+	485	protein_coding	-	-	26	5	4	1	1	0	2.54996	0.49231	0.428428	0.108327	0.128045	0
FBgn0266356	4.56673	2.80831	10.0608	0	1.16785	0	5.81195	0.389283	3.95139	0.0161253	0.0411578	CR45004	2L	20664882	20668605	+	3724	lincRNA	-	-	5	3	10	0	1	0	0.0638649	0.03847	0.139492	0	0.0166761	0
FBgn0039694	5.48008	3.74442	11.0669	0	1.16785	0	6.76379	0.389283	4.17074	0.00837215	0.0238876	fig	3R	29779273	29780452	-	1180	protein_coding	-	SpoIIE	6	4	11	0	1	0	0.241864	0.161878	0.48425	0	0.0526287	0
FBgn0036860	5.48008	3.74442	3.01824	0	0	0	4.08091	0	4.40957	0.0158441	0.0405856	CG14086	3L	19275791	19279919	+	1536	protein_coding	-	-	6	4	3	0	0	0	0.185807	0.12436	0.101459	0	0	0
FBgn0034829	1.82669	6.55273	6.03648	0	0	0	4.8053	0	4.64109	0.010297	0.0283345	CG9899	2R	23153854	23162077	+	2988	protein_coding	-	-	2	7	6	0	0	0	0.0318384	0.111874	0.104311	0	0	0
FBgn0032809	46.5807	84.2494	62.377	1.99118	5.83924	0	64.4024	2.61014	4.70324	1.26992e-11	2.90445e-10	CG13078	2L	19563930	19565158	+	910	protein_coding	-	Cytochrom_B561	51	90	62	2	5	0	2.66582	4.72293	3.53924	0.115469	0.341219	0
FBgn0266637	10.0468	2.80831	3.01824	0	0	0	5.29112	0	4.7855	0.00759687	0.0220967	CR45144	2R	17036695	17037982	-	1188	lincRNA	-	-	11	3	3	0	0	0	0.440432	0.120591	0.131179	0	0	0
FBgn0052198	84.0279	92.6744	67.4074	4.97796	3.50354	0	81.3699	2.82717	4.86833	2.1842e-15	7.44889e-14	CG32198	3L	18526976	18527445	+	470	protein_coding	-	-	92	99	67	5	3	0	9.31091	10.0588	7.40519	0.558921	0.396395	0
FBgn0085246	134.262	222.793	168.015	5.97355	7.00709	3.93002	175.023	5.63689	4.97233	6.77378e-28	6.67362e-26	CG34217	2R	8227990	8228727	-	738	protein_coding	-	-	147	238	167	6	6	4	9.47465	15.4004	11.7549	0.427143	0.504893	0.281143
FBgn0030614	5.48008	9.36105	4.02432	0	0	0	6.28848	0	5.033	0.0023281	0.00819419	CG9072	X	15095458	15096042	-	585	protein_coding	-	-	6	10	4	0	0	0	0.487863	0.816309	0.355192	0	0	0
FBgn0033981	5992.47	7552.49	6354.4	234.96	161.163	189.624	6633.12	195.249	5.08285	3.1955e-225	1.84172e-221	Cyp6a21	2R	14885264	14886947	-	1631	protein_coding	-	p450	6561	8068	6316	236	138	193	191.345	236.223	201.163	7.60215	5.25448	6.13801
FBgn0034467	2.74004	10.2972	8.04864	0	0	0	7.02861	0	5.19033	0.00172707	0.0063742	CG15128	2R	19685614	19688078	-	2011	protein_coding	-	-	3	11	8	0	0	0	0.0709596	0.261211	0.206651	0	0	0
FBgn0040261	17.3536	13.1055	16.0973	0	1.16785	0	15.5188	0.389283	5.37284	7.42732e-05	0.000437479	Ugt36Bb	2L	16796595	16798273	+	1620	protein_coding	-	UDPGT	19	14	16	0	1	0	0.55788	0.412689	0.513055	0	0.0383345	0
FBgn0032415	38.3605	55.2302	29.1763	0	0	0	40.9224	0	7.73466	1.38231e-09	2.30259e-08	rho-6	2L	12130516	12133411	-	944	protein_coding	-	Rhomboid	42	59	29	0	0	0	2.11631	2.98463	1.59583	0	0	0
FBgn0037224	0	0	0	129.427	77.078	89.408	0	98.6376	-9.14107	9.88981e-14	2.84289e-12	TwdlF	3R	4247020	4248313	+	1235	protein_coding	-	-	0	0	0	130	66	91	0	0	0	5.53038	3.3188	3.82207
FBgn0034783	0	0	0	34.8457	42.0425	52.0728	0	42.987	-7.9414	2.96264e-10	5.5529e-09	CG9825	2R	22837361	22839291	+	1543	protein_coding	-	MFS_1	0	0	0	35	36	53	0	0	0	1.19174	1.44891	1.7817
FBgn0030098	0	14.0416	1.00608	496.8	1105.95	960.89	5.01588	854.547	-7.41053	3.2628e-07	3.53813e-06	CG12057	X	9191657	9192548	+	892	protein_coding	-	-	0	15	1	499	947	978	0	0.803039	0.0582364	29.391	65.931	56.872
FBgn0030340	0	0	0	18.9162	25.6927	23.5801	0	22.7297	-7.01993	9.85352e-08	1.20703e-06	CG15740	X	11842662	11846099	-	3265	protein_coding	-	-	0	0	0	19	22	24	0	0	0	0.305737	0.41845	0.381287
FBgn0039444	0.913346	0	0	93.5856	25.6927	3.93002	0.304449	41.0694	-6.91423	4.84187e-06	3.94433e-05	TwdlD	3R	26640025	26641054	+	965	protein_coding	-	-	1	0	0	94	22	4	0.0492918	0	0	5.11775	1.41579	0.215009
FBgn0036592	0	0	0	18.9162	23.357	9.82505	0	17.3661	-6.62907	1.87984e-06	1.68368e-05	CG13049	3L	16281132	16281930	-	736	protein_coding	-	-	0	0	0	19	20	10	0	0	0	1.35629	1.68755	0.704768
FBgn0035886	17.3536	4.68052	1.00608	198.123	892.236	1039.49	7.68006	709.95	-6.52473	7.17907e-09	1.08886e-07	Jon66Ci	3L	8391540	8392377	+	838	protein_coding	-	Trypsin	19	5	1	199	764	1058	1.07848	0.284929	0.0619891	12.4763	56.6179	65.4886
FBgn0035547	1.82669	0	0	68.6958	29.1962	33.4052	0.608898	43.7657	-6.11948	1.20921e-07	1.45344e-06	CG15022	3L	4459193	4460317	-	1063	protein_coding	-	-	2	0	0	69	25	34	0.089495	0	0	3.41031	1.46053	1.65909
FBgn0030980	0	0	0	15.9295	8.17494	5.89503	0	9.99981	-5.8387	0.000128685	0.000705686	CG7406	X	19077720	19078592	+	812	protein_coding	-	-	0	0	0	16	7	6	0	0	0	1.03524	0.53536	0.383283
FBgn0034301	3.65339	0	1.00608	118.475	38.539	91.373	1.55316	82.7958	-5.71734	2.56122e-12	6.41808e-11	CG5756	2R	18101061	18108389	-	4100	protein_coding	-	CBM_14	4	0	1	119	33	93	0.0464064	0	0.01267	1.5249	0.499844	1.17659
FBgn0037419	0	0	0	7.96473	7.00709	10.8076	0	8.59313	-5.62094	0.000224154	0.00114227	Osi12	3R	6278531	6282495	+	1755	protein_coding	-	-	0	0	0	8	6	11	0	0	0	0.239492	0.212314	0.325117
FBgn0035887	1.82669	1.87221	0	18.9162	74.7423	91.373	1.23297	61.6772	-5.61404	2.73633e-09	4.36261e-08	Jon66Cii	3L	8392820	8393649	-	830	protein_coding	-	Trypsin	2	2	0	19	64	93	0.114618	0.11507	0	1.20269	4.78857	5.81205
FBgn0003065	0.913346	0.936105	0	40.8192	19.8534	23.5801	0.616484	28.0843	-5.47823	2.72217e-06	2.35751e-05	CG2150	3R	31763304	31764772	-	1170	protein_coding	-	-	1	1	0	41	17	24	0.0406552	0.0408154	0	1.8411	0.902334	1.06402
FBgn0035735	0	0	2.01216	71.6826	8.17494	4.91253	0.67072	28.2567	-5.45277	0.00018877	0.000984148	Cpr65Ea	3L	7086003	7086608	-	540	protein_coding	-	Chitin_bind_4	0	0	2	72	7	5	0	0	0.192396	7.00514	0.805023	0.480287
FBgn0037068	0	0	0	13.9383	5.83924	2.94752	0	7.57501	-5.43818	0.00111367	0.00444195	Cpr78Cb	3L	21294492	21296698	+	2124	protein_coding	-	Chitin_bind_4	0	0	0	14	5	3	0	0	0	0.346299	0.146191	0.0732641
FBgn0052570	0	0.936105	0	27.8766	8.17494	5.89503	0.312035	13.9822	-5.36215	0.000341767	0.00162456	TwdlY	X	16734947	16735980	+	1034	protein_coding	-	-	0	1	0	28	7	6	0	0.0461838	0	1.42271	0.420418	0.300992
FBgn0039434	0	0	4.02432	133.409	5.83924	13.7551	1.34144	51.0012	-5.26602	0.0117431	0.0316269	TwdlM	3R	26619118	26620224	+	1030	protein_coding	-	-	0	0	4	134	5	14	0	0	0.201735	6.83512	0.301465	0.705042
FBgn0034514	0.913346	0	0	0	35.0354	3.93002	0.304449	12.9885	-5.24564	0.00577048	0.0176109	CG13427	2R	20538877	20539316	-	440	protein_coding	-	-	1	0	0	0	30	4	0.108106	0	0	0	4.23421	0.471554
FBgn0036394	0	0	0	3.98237	12.8463	1.96501	0	6.26457	-5.15167	0.00386434	0.0125867	CG9040	3L	13987878	13988626	+	749	protein_coding	-	-	0	0	0	4	11	2	0	0	0	0.28058	0.912043	0.138507
FBgn0036393	0	0	0	0.995591	11.6785	5.89503	0	6.1897	-5.13704	0.00505493	0.015808	CG17362	3L	13986620	13987184	+	565	protein_coding	-	-	0	0	0	1	10	6	0	0	0	0.0929886	1.09915	0.550842
FBgn0035428	1.82669	0	0	20.9074	9.34278	31.4402	0.608898	20.5635	-5.03709	6.35312e-05	0.000381221	CG14960	3L	3271036	3276255	+	1444	protein_coding	-	-	2	0	0	21	8	32	0.0658817	0	0	0.764065	0.344054	1.14949
FBgn0039387	0	0	0	1.99118	3.50354	10.8076	0	5.4341	-4.96152	0.00642547	0.019228	MCO3	3R	25897476	25899744	+	2202	protein_coding	-	-	0	0	0	2	3	11	0	0	0	0.047719	0.0846074	0.259119
FBgn0031654	117.822	147.905	99.6019	1944.39	5313.71	3709.94	121.776	3656.01	-4.90757	1.94415e-28	1.9832e-26	Jon25Bii	2L	4952243	4953136	-	894	protein_coding	-	Trypsin	129	158	99	1953	4550	3776	6.86364	8.43976	5.7525	114.774	316.066	219.088
FBgn0020906	251.17	247.132	199.204	3804.15	8760.03	7069.13	232.502	6544.44	-4.81437	1.64942e-77	1.90129e-74	Jon25Bi	2L	4954279	4955144	-	866	protein_coding	-	Trypsin	275	264	198	3821	7501	7195	15.1049	14.5578	11.877	231.813	537.905	430.96
FBgn0035875	0	0	0	5.97355	5.83924	2.94752	0	4.9201	-4.81103	0.00607699	0.0183857	Cpr66Cb	3L	8336672	8338595	+	1001	protein_coding	-	Chitin_bind_4	0	0	0	6	5	3	0	0	0	0.314917	0.310199	0.155457
FBgn0039472	61.1942	68.3357	59.3587	1788.08	2098.62	1350.94	62.9629	1745.88	-4.79217	3.26047e-123	7.51668e-120	CG17192	3R	27017180	27018287	-	1052	protein_coding	-	Lipase	67	73	59	1796	1797	1375	3.02943	3.31373	2.91337	89.6951	106.081	67.7971
FBgn0035429	3.65339	0	1.00608	69.6914	15.182	42.2477	1.55316	42.3737	-4.75502	3.09393e-07	3.38045e-06	CG12017	3L	3280239	3290896	+	2667	protein_coding	-	-	4	0	1	70	13	43	0.071341	0	0.0194776	1.37897	0.302708	0.836315
FBgn0033943	0	0	0	2.98677	5.83924	4.91253	0	4.57951	-4.70684	0.00822366	0.0235455	CG12869	2R	14591203	14595617	+	3339	protein_coding	-	COesterase	0	0	0	3	5	5	0	0	0	0.0472045	0.0929946	0.0776744
FBgn0036638	0	0	1.00608	23.8942	2.3357	0	0.33536	8.7433	-4.6847	0.0186668	0.0465236	CG13033	3L	16544567	16545628	-	828	protein_coding	-	-	0	0	1	24	2	0	0	0	0.0627378	1.52286	0.150004	0
FBgn0038242	0	0	0	2.98677	9.34278	0.982505	0	4.43735	-4.65339	0.0181744	0.0455343	CG14852	3R	14565927	14566513	+	587	protein_coding	-	-	0	0	0	3	8	1	0	0	0	0.268511	0.846362	0.0883662
FBgn0004781	1.82669	0	0	20.9074	10.5106	13.7551	0.608898	15.0577	-4.58557	0.000286898	0.00140011	Ccp84Ac	3R	6695148	6696271	-	1060	protein_coding	-	Chitin_bind_4	2	0	0	21	9	14	0.0897483	0	0	1.04086	0.52728	0.685088
FBgn0039436	0	0	2.01216	42.8104	1.16785	1.96501	0.67072	15.3144	-4.55914	0.0077007	0.0223367	TwdlB	3R	26622451	26623543	-	1025	protein_coding	-	-	0	0	2	43	1	2	0	0	0.10136	2.20406	0.0605871	0.101212
FBgn0038719	19.1803	3.74442	11.0669	330.536	210.213	243.661	11.3305	261.47	-4.52421	1.18105e-30	1.41813e-28	CG16727	3R	19613381	19615784	+	2014	protein_coding	-	Sugar_tr	21	4	11	332	180	248	0.495977	0.0948442	0.283722	8.66078	5.55031	6.38729
FBgn0037416	10.0468	1.87221	0	137.392	45.5461	84.4955	3.97301	89.1444	-4.46452	8.15088e-10	1.43443e-08	Osi9	3R	6260211	6262105	+	1360	protein_coding	-	-	11	2	0	138	39	86	0.38473	0.0702266	0	5.33112	1.78086	3.28008
FBgn0035511	0.913346	0	0	11.9471	3.50354	6.87754	0.304449	7.44273	-4.4559	0.00454536	0.0144682	Cpr64Ab	3L	4210880	4211540	-	552	protein_coding	-	Chitin_bind_4	1	0	0	12	3	7	0.0861714	0	0	1.14214	0.33751	0.657784
FBgn0038718	8.22012	17.786	12.073	321.576	230.066	276.084	12.693	275.909	-4.44512	6.4497e-44	1.65213e-41	CG17752	3R	19610225	19612437	+	1716	protein_coding	-	Sugar_tr	9	19	12	323	197	281	0.249475	0.528745	0.363265	9.88925	7.1294	8.49402
FBgn0030459	2.74004	0	0	12.9427	18.6856	29.4752	0.913346	20.3678	-4.43703	5.09452e-05	0.000315046	CG12723	X	13189643	13191883	-	2113	protein_coding	-	-	3	0	0	13	16	30	0.0675342	0	0	0.323238	0.470246	0.736455
FBgn0030390	0	0.936105	4.02432	30.8633	23.357	41.2652	1.65348	31.8285	-4.31624	3.39887e-07	3.66499e-06	CG15731	X	12456409	12457763	-	1180	protein_coding	-	-	0	1	4	31	20	42	0	0.0404695	0.176091	1.38025	1.05257	1.84625
FBgn0032066	39.2739	24.3387	20.1216	368.369	747.423	500.095	27.9114	538.629	-4.26397	1.12006e-39	2.30553e-37	CG9463	2L	8765273	8768710	-	3198	protein_coding	-	-	43	26	20	370	640	509	0.639576	0.388244	0.324871	6.07857	12.4281	8.25588
FBgn0053128	0	0	1.00608	8.96032	8.17494	1.96501	0.33536	6.36676	-4.21962	0.0102505	0.0282336	CG33128	2L	1494070	1495456	+	1387	protein_coding	-	Asp	0	0	1	9	7	2	0	0	0.0374527	0.340914	0.313419	0.0747959
FBgn0036781	0.913346	0.936105	0	22.8986	7.00709	3.93002	0.616484	11.2786	-4.16849	0.00296837	0.0100933	CG13699	3L	18154897	18162522	-	3755	protein_coding	-	-	1	1	0	23	6	4	0.0126675	0.0127175	0	0.321808	0.0992306	0.0552553
FBgn0029807	21.007	0.936105	2.01216	155.312	74.7423	186.676	7.98508	138.91	-4.11606	0.000573079	0.00252037	CG3108	X	5777195	5781620	-	3578	protein_coding	-	-	23	1	2	156	64	190	0.305766	0.0133466	0.0290368	2.29067	1.11082	2.75447
FBgn0032362	2.74004	0	0	21.903	9.34278	16.7026	0.913346	15.9828	-4.09271	0.000347106	0.00164383	spz4	2L	11501715	11508649	+	2954	protein_coding	-	-	3	0	0	22	8	17	0.0483073	0	0	0.391283	0.168184	0.298513
FBgn0037424	20.0936	0	4.02432	184.184	67.7352	150.323	8.03931	134.081	-4.05722	0.00318681	0.0107379	Osi15	3R	6301804	6303653	+	1232	protein_coding	-	-	22	0	4	185	58	153	0.849404	0	0.168659	7.88931	2.92362	6.44177
FBgn0001285	23.747	31.8276	55.3344	336.51	655.163	718.211	36.9697	569.961	-3.95186	4.28458e-30	4.93884e-28	Jon44E	2R	8691448	8692844	+	1397	protein_coding	-	Trypsin	26	34	55	338	561	731	0.885277	1.16223	2.04515	12.7116	24.9385	27.1422
FBgn0031844	0	0	1.00608	4.97796	3.50354	6.87754	0.33536	5.11968	-3.9146	0.0169664	0.0429734	CG13771	2L	6662061	6663612	-	1431	protein_coding	-	-	0	0	1	5	3	7	0	0	0.0363011	0.183573	0.130192	0.253736
FBgn0033774	897.819	1240.34	664.013	13534.1	16073.1	12614.4	934.057	14073.8	-3.91301	1.97549e-80	2.53016e-77	CG12374	2R	12762113	12763825	+	1464	protein_coding	-	-	983	1325	660	13594	13763	12839	31.9385	43.22	23.4187	487.848	583.816	454.898
FBgn0037069	0	0.936105	3.01824	25.8854	18.6856	11.7901	1.31812	18.787	-3.8732	9.29197e-05	0.000532084	Cpr78Cc	3L	21300580	21301171	+	522	protein_coding	-	Chitin_bind_4	0	1	3	26	16	12	0	0.0914829	0.298545	2.61686	1.9035	1.19244
FBgn0036351	3.65339	0.936105	0	34.8457	12.8463	20.6326	1.52983	22.7749	-3.86712	4.30414e-05	0.000272304	CG14107	3L	13380359	13381346	-	925	protein_coding	-	-	4	1	0	35	11	21	0.205693	0.051626	0	1.98795	0.738508	1.17761
FBgn0030398	0.913346	0	0	3.98237	5.83924	4.91253	0.304449	4.91138	-3.84644	0.0191653	0.0476119	Cpr11B	X	12553124	12554235	+	818	protein_coding	-	Chitin_bind_4	1	0	0	4	5	5	0.0581499	0	0	0.256912	0.379595	0.31706
FBgn0037414	161.662	0.936105	17.1034	1189.73	464.803	930.433	59.9006	861.656	-3.84607	0.0117795	0.0316951	Osi7	3R	6248994	6251683	+	2690	protein_coding	-	-	177	1	17	1195	398	947	3.12985	0.0177524	0.328289	23.3396	9.1883	18.2609
FBgn0038642	3.65339	0	1.00608	32.8545	14.0142	20.6326	1.55316	22.5004	-3.84178	3.64077e-05	0.000234322	Muc91C	3R	18687556	18692719	-	3111	protein_coding	-	-	4	0	1	33	12	21	0.0611592	0	0.0166978	0.557304	0.239544	0.350141
FBgn0038132	2.74004	0	2.01216	31.8589	16.3499	17.6851	1.58407	21.9646	-3.79679	2.40831e-05	0.000162153	CG15887	3R	13287655	13288813	-	863	protein_coding	-	-	3	0	2	32	14	18	0.165353	0	0.120387	1.94813	1.00745	1.0819
FBgn0051041	17.3536	44.933	47.2858	298.677	559.399	567.888	36.5241	475.322	-3.7058	1.85087e-25	1.52393e-23	CG31041	3R	29590070	29590906	-	700	protein_coding	-	-	19	48	47	300	479	578	1.29109	3.27456	3.48786	22.5165	42.4954	42.8306
FBgn0263493	1.82669	0.936105	2.01216	16.9251	39.7068	4.91253	1.59165	20.5148	-3.68417	0.000358736	0.00169265	CR43482	3L	9386112	9386463	+	352	pseudogene	-	-	2	1	2	17	34	5	0.270265	0.135665	0.295153	2.53737	5.99847	0.736803
FBgn0085345	0.913346	0	4.02432	18.9162	23.357	18.6676	1.64589	20.3136	-3.66214	4.83499e-05	0.000300771	CG34316	3R	15230585	15231686	+	907	protein_coding	-	-	1	0	4	19	20	19	0.0524439	0	0.229093	1.10059	1.36939	1.0866
FBgn0040393	0	0	2.01216	3.98237	17.5177	2.94752	0.67072	8.1492	-3.64167	0.0188525	0.0469359	CG14265	X	3236130	3236686	-	557	protein_coding	-	-	0	0	2	4	15	3	0	0	0.186524	0.377297	1.6724	0.279377
FBgn0035281	0.913346	0	2.01216	27.8766	7.00709	0.982505	0.975169	11.9554	-3.63759	0.0109974	0.0299403	Cpr62Bc	3L	1840281	1842084	-	1134	protein_coding	-	Chitin_bind_4	1	0	2	28	6	1	0.0419459	0	0.091617	1.29725	0.328581	0.0457416
FBgn0037323	0	1.87221	2.01216	21.903	9.34278	13.7551	1.29479	15.0003	-3.56044	0.000488907	0.00220314	CG2663	3R	5400594	5404135	-	1645	protein_coding	-	-	0	2	2	22	8	14	0	0.0580596	0.0631573	0.702644	0.302015	0.441455
FBgn0051953	1.82669	2.80831	1.00608	58.7399	5.83924	0.982505	1.88036	21.8539	-3.53573	0.00545584	0.0168334	CR31953	2L	3162515	3163289	+	715	pseudogene	-	Tyr-DNA_phospho	2	3	1	59	5	1	0.133053	0.200367	0.072653	4.33535	0.434278	0.0725468
FBgn0043576	57.5408	133.863	114.693	659.081	1445.8	1392.21	102.032	1165.7	-3.51449	7.44769e-13	1.9781e-11	PGRP-SC1a	2R	8709733	8710320	+	588	protein_coding	-	-	63	143	114	662	1238	1417	5.09642	11.6137	10.0713	59.1506	130.752	125.002
FBgn0036024	343.418	310.787	403.438	2726.92	4723.94	4526.4	352.548	3992.42	-3.5017	1.72115e-62	8.26656e-60	CG18180	3L	9641013	9641913	+	901	protein_coding	-	Trypsin	376	332	401	2739	4045	4607	19.8502	17.5964	23.1195	159.715	278.803	265.227
FBgn0066365	34.7072	0.936105	4.02432	151.33	77.078	179.798	13.2225	136.069	-3.36086	0.00752321	0.0219101	dyl	3L	4294004	4307718	-	3139	protein_coding	-	Zona_pellucida	38	1	4	152	66	183	0.57583	0.0152131	0.0661954	2.54408	1.30574	3.02402
FBgn0036600	0	0	4.02432	19.9118	14.0142	4.91253	1.34144	12.9462	-3.31192	0.00721927	0.0212125	CG13043	3L	16305225	16305870	-	646	protein_coding	-	-	0	0	4	20	12	5	0	0	0.321652	1.62658	1.15359	0.401478
FBgn0033720	2.74004	4.68052	2.01216	34.8457	33.8676	23.5801	3.14424	30.7645	-3.2813	5.34814e-07	5.47983e-06	CG13160	2R	12371594	12375081	+	2736	protein_coding	-	-	3	5	2	35	29	24	0.0521564	0.0872698	0.0379729	0.672094	0.658243	0.455008
FBgn0038487	3.65339	1.87221	0	29.8677	15.182	8.84255	1.84186	17.9641	-3.26116	0.000742406	0.0031416	TwdlW	3R	17141208	17142404	-	1126	protein_coding	-	-	4	2	0	30	13	9	0.168975	0.0848207	0	1.39978	0.716984	0.414599
FBgn0034499	0	0.936105	6.03648	43.806	10.5106	10.8076	2.3242	21.7081	-3.25463	0.00222715	0.00790163	Cpr56F	2R	20288371	20291945	-	1259	protein_coding	-	Chitin_bind_4	0	1	6	44	9	11	0	0.0379302	0.247562	1.83614	0.443937	0.453201
FBgn0032282	4.56673	1.87221	5.0304	17.9206	64.2316	26.5276	3.82311	36.2266	-3.24194	8.4557e-06	6.49792e-05	CG7299	2L	10683427	10684409	-	983	protein_coding	-	-	5	2	5	18	55	27	0.241946	0.0971598	0.264226	0.962049	3.47467	1.42474
FBgn0030569	21.007	14.9777	2.01216	105.533	74.7423	178.816	12.6656	119.697	-3.23132	9.8187e-09	1.46039e-07	CG9411	X	14472408	14480086	-	3684	protein_coding	-	-	23	16	2	106	64	182	0.296968	0.207401	0.0282013	1.5117	1.07886	2.56257
FBgn0085411	0	0.936105	2.01216	13.9383	4.67139	7.86004	0.982755	8.82324	-3.2041	0.00947285	0.0264467	CG34382	3L	9878985	9884493	+	3091	protein_coding	-	-	0	1	2	14	4	8	0	0.0154494	0.0336117	0.237962	0.0803647	0.13425
FBgn0028938	5.48008	0.936105	1.00608	57.7443	7.00709	1.96501	2.47409	22.2388	-3.15988	0.00947482	0.0264467	CG16886	2L	13920707	13923553	-	2433	protein_coding	-	-	6	1	1	58	6	2	0.117304	0.0196276	0.021351	1.25246	0.153149	0.0426395
FBgn0035685	0.913346	0.936105	1.00608	10.9515	9.34278	4.91253	0.951844	8.40227	-3.14118	0.00776619	0.022487	CG13297	3L	6156592	6157377	-	595	protein_coding	-	-	1	1	1	11	8	5	0.0799439	0.0802589	0.0873057	0.971301	0.834982	0.43589
FBgn0038646	2.74004	0	5.0304	12.9427	28.0284	26.5276	2.59015	22.4996	-3.13414	0.000187066	0.000977034	CG7715	3R	18727573	18728468	-	823	protein_coding	-	-	3	0	5	13	24	27	0.17339	0	0.315595	0.829892	1.81099	1.70172
FBgn0039852	5.48008	0.936105	1.00608	27.8766	1.16785	36.3527	2.47409	21.799	-3.13208	0.00564383	0.017293	nyo	3R	31543032	31566165	+	3812	protein_coding	-	PAN_1	6	1	1	28	1	37	0.0748687	0.0125273	0.0136272	0.385908	0.0162911	0.503469
FBgn0033362	4.56673	0	1.00608	22.8986	4.67139	21.6151	1.8576	16.395	-3.13198	0.00370856	0.0121479	CG8172	2R	9007234	9013526	-	3146	protein_coding	-	Trypsin	5	0	1	23	4	22	0.0755985	0	0.016512	0.384103	0.0789597	0.362734
FBgn0028948	2.74004	2.80831	6.03648	34.8457	29.1962	35.3702	3.86161	33.1374	-3.11853	2.48551e-07	2.76646e-06	CG15253	2L	15615357	15616351	-	942	protein_coding	-	Astacin	3	3	6	35	25	36	0.151486	0.152083	0.330872	1.95207	1.64814	1.98233
FBgn0033327	43.8406	100.163	79.4803	306.642	746.255	883.272	74.4947	645.39	-3.11529	1.56935e-08	2.27546e-07	PGRP-SC1b	2R	8713446	8715094	+	1649	protein_coding	-	-	48	107	79	308	639	899	1.38459	3.09866	2.48866	9.81315	24.0649	28.279
FBgn0039264	0.913346	3.74442	0	20.9074	2.3357	16.7026	1.55259	13.3152	-3.09316	0.00949736	0.0264897	CG11786	3R	25046323	25047409	+	768	protein_coding	-	-	1	4	0	21	2	17	0.0619357	0.248719	0	1.4366	0.161723	1.14819
FBgn0030537	0.913346	0	12.073	35.8413	53.721	19.6501	4.32877	36.4041	-3.09181	0.00103645	0.00418906	CG12480	X	14169592	14171545	+	1954	protein_coding	-	-	1	0	12	36	46	20	0.0243432	0	0.319019	0.967957	1.46197	0.530921
FBgn0035513	4.56673	2.80831	0	28.8721	19.8534	14.7376	2.45835	21.1544	-3.07998	0.000191529	0.000995383	Cpr64Ad	3L	4215379	4216414	+	961	protein_coding	-	Chitin_bind_4	5	3	0	29	17	15	0.247485	0.149076	0	1.58545	1.09858	0.80964
FBgn0003358	406.439	415.631	436.639	3377.05	3801.34	3271.74	419.569	3483.38	-3.05363	9.83733e-176	3.77983e-172	Jon99Ci	3R	29925226	29926189	-	907	protein_coding	-	Trypsin	445	444	434	3392	3255	3330	23.3375	23.3769	24.8566	196.484	222.868	190.441
FBgn0037429	9.13346	1.87221	10.0608	80.6429	26.8605	62.8803	7.02216	56.7946	-3.02396	1.10526e-06	1.04429e-05	Osi19	3R	6335362	6337196	+	1138	protein_coding	-	-	10	2	10	81	23	64	0.417984	0.0839263	0.456475	3.73956	1.25513	2.91717
FBgn0019928	71.241	66.4634	47.2858	465.937	560.567	468.655	61.6634	498.386	-3.00944	7.03438e-52	2.38486e-49	Ser8	2R	13434207	13435045	+	839	protein_coding	-	Trypsin	78	71	47	468	480	477	4.42216	4.04117	2.91001	29.3064	35.529	29.4904
FBgn0050413	8.22012	0	6.03648	48.784	33.8676	30.4577	4.7522	37.7031	-2.98911	1.44074e-05	0.000104187	CG30413	2R	23329543	23330068	-	526	protein_coding	-	-	9	0	6	49	29	31	0.813877	0	0.59255	4.89428	3.42386	3.05703
FBgn0033065	1060.4	1299.31	1294.83	12097.4	8263.69	6917.82	1218.18	9092.98	-2.90015	3.1597e-48	9.84374e-46	Cyp6w1	2R	6173684	6176195	+	2392	protein_coding	-	p450	1161	1388	1287	12151	7076	7041	23.0873	27.7101	27.9497	266.888	183.709	152.685
FBgn0038941	2.74004	2.80831	1.00608	10.9515	15.182	22.5976	2.18481	16.2437	-2.88237	0.000599612	0.00262205	CG7080	3R	22329300	22330546	+	1178	protein_coding	-	-	3	3	1	11	13	23	0.121137	0.121615	0.0440975	0.490598	0.685334	1.01276
FBgn0042137	0	2.80831	1.00608	13.9383	7.00709	6.87754	1.27146	9.2743	-2.87267	0.0121386	0.0325022	CG18814	3L	16369826	16370945	+	956	protein_coding	-	adh_short	0	3	1	14	6	7	0	0.149856	0.0543377	0.769393	0.38976	0.379808
FBgn0038073	2.74004	0.936105	1.00608	17.9206	4.67139	11.7901	1.56074	11.4607	-2.87211	0.0057075	0.0174603	CG14395	3R	12662831	12673959	+	4562	protein_coding	-	-	3	1	1	18	4	12	0.0312801	0.0104678	0.0113869	0.207298	0.0544514	0.136443
FBgn0085358	31.9671	18.7221	32.1946	254.871	159.995	160.148	27.6279	191.672	-2.79707	2.27672e-18	1.07117e-16	Diedel3	X	19050442	19053160	+	2719	protein_coding	-	-	35	20	32	256	137	163	0.612295	0.351262	0.611364	4.94663	3.12907	3.10959
FBgn0032284	0.913346	0	4.02432	2.98677	19.8534	10.8076	1.64589	11.2159	-2.78701	0.0200643	0.0495779	CG7294	2L	10688734	10689271	-	538	protein_coding	-	-	1	0	4	3	17	11	0.0884138	0	0.386222	0.292966	1.96232	1.06056
FBgn0052571	1.82669	1.87221	3.01824	18.9162	16.3499	9.82505	2.23905	15.0304	-2.75392	0.000974101	0.00397468	TwdlX	X	16731091	16732630	+	1366	protein_coding	-	-	2	2	3	19	14	10	0.0696436	0.0699181	0.114085	0.730771	0.636475	0.379729
FBgn0035508	3.65339	0	2.01216	14.9339	5.83924	16.7026	1.88852	12.4919	-2.72783	0.00733574	0.0214617	CG15005	3L	4200825	4204339	-	2648	protein_coding	-	-	4	0	2	15	5	17	0.0718529	0	0.0392348	0.297613	0.117262	0.333008
FBgn0038676	9.13346	1.87221	3.01824	25.8854	11.6785	54.0378	4.67464	30.5339	-2.70356	0.000649784	0.00280002	CG6026	3R	19033538	19044693	+	5461	protein_coding	-	-	10	2	3	26	10	55	0.0871024	0.0174891	0.028537	0.250138	0.113719	0.522414
FBgn0265038	1.82669	2.80831	1.00608	10.9515	10.5106	14.7376	1.88036	12.0666	-2.67464	0.00295941	0.0100718	CR44155	3R	4646433	4648242	-	1743	lincRNA	-	-	2	3	1	11	9	15	0.0545802	0.0821929	0.0298031	0.331569	0.320663	0.446394
FBgn0028945	26.487	28.0831	24.1459	155.312	193.863	149.341	26.2387	166.172	-2.65898	2.37705e-23	1.70188e-21	CG7631	2L	15628678	15629552	+	813	protein_coding	-	Astacin	29	30	24	156	166	152	1.69672	1.76214	1.53349	10.0812	12.6801	9.69789
FBgn0004426	249.344	220.921	231.398	1145.93	1406.09	1828.44	233.888	1460.15	-2.64219	3.75391e-46	1.0554e-43	LysC	3L	1210485	1210971	+	487	protein_coding	-	-	273	236	230	1151	1204	1861	26.6646	23.1416	24.5334	124.172	153.533	198.217
FBgn0035667	281.311	499.88	395.39	1345.04	2826.19	2819.79	392.193	2330.34	-2.57093	1.53107e-19	8.13301e-18	Jon65Ai	3L	6053493	6054443	-	951	protein_coding	-	Trypsin	308	534	393	1351	2420	2870	15.4054	26.8146	21.467	74.6368	158.03	156.54
FBgn0052499	1.82669	9.36105	9.05472	57.7443	29.1962	30.4577	6.74749	39.1327	-2.54697	3.81188e-05	0.000244109	Cda4	X	22583634	22632710	-	1934	protein_coding	-	CBM_14	2	10	9	58	25	31	0.0491899	0.246919	0.241738	1.57561	0.802764	0.831437
FBgn0037427	6.39342	2.80831	3.01824	25.8854	14.0142	30.4577	4.07333	23.4524	-2.52307	0.000238966	0.00120549	Osi17	3R	6311772	6327308	+	4068	protein_coding	-	-	7	3	3	26	12	31	0.0818501	0.0352169	0.0383089	0.335792	0.183191	0.39528
FBgn0052284	6.39342	4.68052	5.0304	34.8457	29.1962	28.4927	5.36812	30.8449	-2.52068	4.25435e-06	3.52045e-05	CG32284	3L	3186664	3187245	+	457	protein_coding	-	-	7	5	5	35	25	29	0.728591	0.522473	0.568346	4.02374	3.39725	3.29159
FBgn0039217	9.13346	0.936105	1.00608	18.9162	17.5177	27.5102	3.69188	21.3147	-2.51377	0.00288591	0.00987997	CG13627	3R	24712780	24717430	+	2728	protein_coding	-	-	10	1	1	19	15	28	0.174364	0.0175052	0.0190421	0.365921	0.341469	0.5324
FBgn0033275	18.2669	0	1.00608	51.7707	17.5177	38.3177	6.42434	35.8687	-2.4737	0.0162823	0.041496	CG14756	2R	8204888	8205706	-	819	protein_coding	-	-	20	0	1	52	15	39	1.16158	0	0.0634272	3.33578	1.1374	2.47005
FBgn0035430	10.9602	0.936105	8.04864	27.8766	25.6927	56.9853	6.6483	36.8515	-2.47324	0.000348843	0.00165	CG12009	3L	3291459	3299000	+	3565	protein_coding	-	CBM_14	12	1	8	28	22	58	0.160112	0.0133952	0.116571	0.412645	0.383237	0.843903
FBgn0265011	4.56673	1.87221	1.00608	11.9471	5.83924	23.5801	2.48167	13.7888	-2.46718	0.00867357	0.0246075	Np	2R	8992945	9006587	-	4195	protein_coding	-	Trypsin	5	2	1	12	5	24	0.0566944	0.0227671	0.012383	0.150289	0.0740188	0.296759
FBgn0037204	1.82669	4.68052	20.1216	28.8721	85.2529	29.4752	8.87627	47.8667	-2.43971	0.00155172	0.00584172	CG11131	3L	22898744	22900262	+	1379	protein_coding	-	-	2	5	20	29	73	30	0.0689871	0.173147	0.753399	1.10487	3.28748	1.12845
FBgn0035582	0.913346	0.936105	18.1094	17.9206	42.0425	45.1952	6.65296	35.0528	-2.41174	0.00953746	0.0265808	CG13705	3L	4896864	4898470	+	1536	protein_coding	-	-	1	1	18	18	36	46	0.0309678	0.0310899	0.608752	0.615686	1.45551	1.55343
FBgn0002565	74.8944	54.2941	109.663	429.1	387.726	442.127	79.6171	419.651	-2.4021	9.28802e-24	6.86301e-22	Lsp2	3L	12129393	12131869	+	2477	protein_coding	-	-	82	58	109	431	332	450	1.57467	1.11818	2.28591	9.14175	8.3237	9.42347
FBgn0032522	2.74004	2.80831	1.00608	10.9515	12.8463	10.8076	2.18481	11.5351	-2.38521	0.00608675	0.0184104	CG16848	2L	13412519	13413716	+	1198	protein_coding	-	-	3	3	1	11	11	11	0.119115	0.119584	0.0433613	0.482408	0.570217	0.476278
FBgn0037181	2.74004	0	8.04864	8.96032	31.5319	13.7551	3.59623	18.0824	-2.33973	0.0159034	0.0406832	CG11370	3L	22712155	22713660	+	1323	protein_coding	-	-	3	0	8	9	27	14	0.107861	0	0.314116	0.357405	1.26738	0.548899
FBgn0260954	4.56673	2.80831	7.04256	28.8721	23.357	18.6676	4.80587	23.6322	-2.307	0.000246039	0.00123201	CG42586	2L	14741161	14741840	-	613	protein_coding	-	-	5	3	7	29	20	19	0.387982	0.233707	0.593194	2.48551	2.02616	1.60775
FBgn0036996	147.962	224.665	153.93	684.967	1000.85	905.87	175.519	863.894	-2.29834	2.03359e-27	1.92141e-25	mag	3L	20460683	20462274	+	1477	protein_coding	-	-	162	240	153	688	857	922	5.21719	7.75963	5.38109	24.4729	36.0333	32.3798
FBgn0266412	4.56673	4.68052	3.01824	30.8633	21.0213	7.86004	4.0885	19.9149	-2.27812	0.00273944	0.00943459	CR45052	3R	31704781	31705498	-	718	lincRNA	-	-	5	5	3	31	18	8	0.331244	0.332549	0.217048	2.26838	1.55687	0.577949
FBgn0028573	6.39342	1.87221	18.1094	40.8192	57.2245	28.4927	8.79169	42.1788	-2.2718	0.000645954	0.00278664	prc	3L	11958872	11966131	-	5535	protein_coding	-	-	7	2	18	41	49	29	0.0601565	0.0172553	0.168933	0.389175	0.549772	0.271772
FBgn0035626	0	3.74442	4.02432	10.9515	10.5106	14.7376	2.58958	12.0666	-2.23765	0.0153181	0.0395104	lin-28	3L	5654681	5657384	+	1152	protein_coding	-	CSD	0	4	4	11	9	15	0	0.165813	0.180371	0.50167	0.48517	0.675403
FBgn0032914	4.56673	2.80831	6.03648	23.8942	21.0213	17.6851	4.47051	20.8669	-2.22906	0.000508342	0.00227648	CG14397	2L	21091227	21094864	+	533	protein_coding	-	-	5	3	6	24	18	18	0.446216	0.268785	0.584768	2.36571	2.09725	1.75174
FBgn0086266	139.742	103.908	132.803	361.4	725.234	603.258	125.484	563.297	-2.16561	1.20772e-16	4.73515e-15	Vm26Ac	2L	5958005	5958631	-	627	protein_coding	-	-	153	111	132	363	621	614	11.6072	8.45407	10.9362	30.4171	61.5075	50.7955
FBgn0004425	310.538	356.656	400.42	917.935	1911.77	1836.3	355.871	1555.33	-2.12788	5.19119e-17	2.12194e-15	LysB	3L	1207371	1207981	+	611	protein_coding	-	-	340	381	398	922	1637	1869	26.4691	29.7779	33.8377	79.2808	166.384	158.669
FBgn0038967	1.82669	2.80831	4.02432	13.9383	9.34278	13.7551	2.88644	12.3454	-2.11151	0.00886736	0.0250709	CG13847	3R	22425214	22436150	-	3083	protein_coding	-	-	2	3	4	14	8	14	0.0308573	0.0464684	0.0673978	0.238579	0.161146	0.235548
FBgn0003060	5.48008	0.936105	17.1034	16.9251	47.8818	34.3877	7.83985	33.0648	-2.08482	0.00814006	0.0233525	CG9757	3R	13611583	13612433	-	851	protein_coding	-	-	6	1	17	17	41	35	0.33537	0.0561152	1.03772	1.04954	2.99198	2.13335
FBgn0050043	19.1803	8.42494	13.079	38.8281	79.4137	49.1253	13.5614	55.789	-2.03346	1.69824e-05	0.00012017	CG30043	2R	12359436	12363165	+	3082	protein_coding	-	-	21	9	13	39	68	50	0.324107	0.139451	0.219114	0.664829	1.37019	0.841515
FBgn0028396	28.3137	23.4026	31.1885	186.176	68.903	81.5479	27.6349	112.209	-2.0249	2.01005e-06	1.79056e-05	TotA	3R	20871036	20871700	+	579	protein_coding	-	-	31	25	31	187	59	83	2.54674	2.06192	2.78127	16.9684	6.32816	7.43573
FBgn0033158	4.56673	4.68052	4.02432	34.8457	9.34278	8.84255	4.42386	17.677	-2.00218	0.0134119	0.035381	CG12164	2R	7311395	7313495	+	1554	protein_coding	-	-	5	5	4	35	8	9	0.153046	0.153649	0.133711	1.1833	0.3197	0.300411
FBgn0015035	147.962	56.1663	145.882	742.711	434.439	219.099	116.67	465.416	-1.99626	0.00171814	0.00634573	Cyp4e3	2L	9747839	9750071	-	1805	protein_coding	-	p450	162	60	145	746	372	223	4.26914	1.58739	4.17302	21.714	12.7988	6.40843
FBgn0265316	5.48008	12.1694	11.0669	56.7487	32.6997	24.5626	9.57211	38.0037	-1.9947	0.00027639	0.00135688	CR44289	3R	27535831	27537903	-	2073	lincRNA	-	-	6	13	11	57	28	25	0.137675	0.299471	0.275647	1.44462	0.838809	0.625554
FBgn0033874	2.74004	2.80831	4.02432	13.9383	5.83924	17.6851	3.19089	12.4875	-1.98318	0.0169433	0.0429336	CG6347	2R	13836419	13839363	+	1312	protein_coding	-	Peptidase_C1	3	3	4	14	5	18	0.108765	0.109194	0.158375	0.560625	0.236668	0.711644
FBgn0051148	264.87	275.215	243.471	1299.25	1042.89	740.809	261.186	1027.65	-1.97581	7.90709e-22	5.14944e-20	CG31148	3R	23700621	23702605	+	1777	protein_coding	-	Glyco_hydro_30	290	294	242	1305	893	754	7.7627	7.90078	7.07436	38.5835	31.2082	22.0094
FBgn0033518	68.501	113.269	70.4256	293.699	319.99	368.44	84.0651	327.376	-1.96069	5.43636e-17	2.21431e-15	Prx2540-2	2R	10418718	10419761	+	856	protein_coding	-	-	75	121	70	295	274	375	4.16763	6.75028	4.24799	18.1062	19.8784	22.7238
FBgn0039728	3.65339	6.55273	10.0608	40.8192	16.3499	20.6326	6.75564	25.9339	-1.95421	0.00247	0.00861733	CG7896	3R	29983426	29990785	+	4955	protein_coding	-	-	4	7	10	41	14	21	0.0383989	0.0674629	0.104837	0.434729	0.175464	0.219837
FBgn0035398	22.8337	11.2333	25.152	102.546	49.0496	76.6354	19.7396	76.077	-1.95216	5.58505e-06	4.48321e-05	Cht7	3L	3090985	3106958	-	3953	protein_coding	-	CBM_14	25	12	25	103	42	78	0.300826	0.144966	0.328528	1.36895	0.659822	1.02351
FBgn0044812	19.1803	9.36105	18.1094	94.5812	36.2033	49.1253	15.5503	59.9699	-1.95158	8.42671e-05	0.000490084	TotC	3R	20872988	20873580	+	530	protein_coding	-	-	21	10	18	95	31	50	1.88471	0.90102	1.76423	9.41729	3.63237	4.89349
FBgn0029831	874.072	667.443	878.308	4276.06	2757.29	2292.19	806.608	3108.51	-1.94643	3.09276e-18	1.42601e-16	CG5966	X	5988791	5992640	+	3751	protein_coding	-	Lipase	957	713	873	4295	2361	2333	12.1358	9.07722	12.09	60.1581	39.0889	32.262
FBgn0033520	51.1474	43.0608	41.2493	226.995	106.274	183.729	45.1525	172.332	-1.93393	1.37958e-09	2.30137e-08	Prx2540-1	2R	10424436	10425471	+	848	protein_coding	-	-	56	46	41	228	91	187	3.14119	2.59043	2.51158	14.1259	6.66423	11.4385
FBgn0001256	36.5339	1.87221	12.073	74.6694	42.0425	71.7229	16.8263	62.8116	-1.89815	0.00735514	0.0215075	ImpL1	3L	13382765	13383999	+	1235	protein_coding	-	-	40	2	12	75	36	73	1.54062	0.0773345	0.504747	3.1906	1.81026	3.06606
FBgn0033521	188.149	243.387	157.955	691.936	791.801	710.351	196.497	731.363	-1.89435	8.88283e-27	8.12638e-25	CG12896	2R	10426880	10427915	-	848	protein_coding	-	-	206	260	157	695	678	723	11.5551	14.6416	9.61752	43.0593	49.6522	44.2249
FBgn0036467	4.56673	6.55273	12.073	29.8677	43.2104	11.7901	7.73081	28.2894	-1.87386	0.00490367	0.0154397	CG12310	3L	15050263	15050806	-	544	protein_coding	-	-	5	7	12	30	37	12	0.437193	0.614482	1.14589	2.89735	4.22384	1.14421
FBgn0038611	1203.79	1271.23	855.168	3690.66	4062.94	4436.01	1110.06	4063.2	-1.87158	6.73911e-31	8.26401e-29	CG14309	3R	18381580	18385072	-	3341	protein_coding	-	-	1318	1358	850	3707	3479	4515	18.7647	19.4104	13.2161	58.2941	64.6669	70.098
FBgn0014076	1268.64	1413.52	1555.4	4207.37	5946.68	5340.9	1412.52	5164.98	-1.87054	2.35039e-35	3.78271e-33	Vm32E	2L	11171167	11171665	-	499	protein_coding	-	-	1389	1510	1546	4226	5092	5436	132.405	144.506	160.942	444.946	633.712	565.071
FBgn0038017	34.7072	25.2748	24.1459	132.414	49.0496	116.918	28.0426	99.4605	-1.82841	1.08264e-05	8.17265e-05	CG4115	3R	12360008	12363255	+	1115	protein_coding	-	-	38	27	24	133	42	119	1.6211	1.15638	1.11814	6.26693	2.33926	5.536
FBgn0001311	24.6604	13.1055	23.1398	82.6341	49.0496	81.5479	20.3019	71.0772	-1.81249	4.19803e-06	3.47634e-05	kkv	3R	5378093	5392866	-	5701	protein_coding	-	-	27	14	23	83	42	83	0.225276	0.11727	0.209573	0.764901	0.457512	0.755181
FBgn0034784	8.22012	8.42494	2.01216	15.9295	33.8676	15.7201	6.21907	21.839	-1.79441	0.00967523	0.0269062	CG9826	2R	22840739	22842977	+	2096	protein_coding	-	MFS_1	9	9	2	16	29	16	0.204246	0.205051	0.0495676	0.401058	0.859233	0.395962
FBgn0039778	1378.24	3317.56	2636.94	5495.66	10383.3	9496.9	2444.24	8458.63	-1.79104	2.18204e-05	0.000149361	Jon99Fi	3R	30488963	30489895	+	933	protein_coding	-	Trypsin	1509	3544	2621	5520	8891	9666	76.9325	181.394	145.93	310.839	591.798	537.39
FBgn0032945	709.67	644.976	617.733	1638.74	2863.56	2305.94	657.46	2269.42	-1.78683	3.17068e-20	1.79159e-18	CG8665	2L	21371227	21377995	+	3624	protein_coding	-	Aldedh	777	689	614	1646	2452	2347	10.1985	9.07907	8.80115	23.8627	42.0181	33.593
FBgn0020637	4.56673	9.36105	35.2128	70.687	67.7352	29.4752	16.3802	55.9658	-1.77971	0.00789666	0.0228132	Lcp65Ag2	3L	6132990	6133593	-	543	protein_coding	-	Chitin_bind_4	5	10	35	71	58	30	0.437998	0.879449	3.34832	6.86968	6.63334	2.8658
FBgn0029966	188.149	186.285	157.955	603.328	634.141	570.836	177.463	602.768	-1.76196	4.90714e-36	8.5704e-34	Ir7c	X	7874394	7876847	+	2358	protein_coding	-	-	206	199	157	606	543	581	4.15552	4.03013	3.45872	13.5023	14.3008	12.7808
FBgn0065046	14.6135	11.2333	12.073	68.6958	36.2033	23.5801	12.6399	42.8264	-1.7607	0.000754923	0.00319222	snoRNA:U3:9B	X	10348170	10348337	+	168	snoRNA	-	-	16	12	12	69	31	24	4.53015	3.411	3.71049	21.5783	11.4593	7.41014
FBgn0001253	36.5339	2.80831	7.04256	54.7575	42.0425	58.9503	15.4616	51.9168	-1.74298	0.0153951	0.0396645	ImpE1	3L	8372405	8391171	+	6264	protein_coding	-	Ldl_recept_a	40	3	7	55	36	60	0.303746	0.0228707	0.0580505	0.461306	0.356907	0.496848
FBgn0039470	49.3207	129.182	51.3101	253.876	295.466	217.134	76.6044	255.492	-1.73618	1.05458e-06	9.98864e-06	CG6296	3R	27003236	27005469	-	2127	protein_coding	-	Lipase	54	138	51	255	253	221	1.20761	3.09829	1.24555	6.2987	7.38682	5.38951
FBgn0019661	65.7609	20.5943	36.2189	226.995	68.903	109.058	40.858	134.985	-1.72442	0.000571399	0.00251394	roX1	X	3857230	3862697	-	5468	lincRNA	-	-	72	22	36	228	59	111	0.626334	0.192134	0.342006	2.19071	0.670082	1.05298
FBgn0265918	6.39342	14.9777	9.05472	33.8501	39.7068	26.5276	10.1419	33.3615	-1.71482	0.000698246	0.00298543	CR44707	X	18682143	18683303	-	1096	lincRNA	-	-	7	16	9	34	34	27	0.303801	0.69714	0.426571	1.62985	1.92652	1.27784
FBgn0085362	1535.34	1730.86	1917.59	3685.68	6740.82	6497.31	1727.93	5641.27	-1.70698	1.32501e-15	4.61432e-14	Vml	X	2275822	2277781	+	1960	protein_coding	-	-	1681	1849	1906	3702	5772	6613	40.7956	45.0496	50.5157	99.2336	182.883	175.012
FBgn0037684	157.096	130.119	185.119	641.161	469.475	422.477	157.444	511.038	-1.70001	2.02765e-15	6.98701e-14	CG8129	3R	9365398	9367763	+	1727	protein_coding	-	PALP	172	139	184	644	402	430	4.73738	3.84355	5.53458	19.5917	14.4557	12.9152
FBgn0035006	72.1544	73.9523	84.5107	89.6032	379.551	271.171	76.8725	246.775	-1.68162	6.61197e-05	0.000394698	CG4563	2R	24451084	24453040	-	1766	protein_coding	-	AMP-binding	79	79	84	90	325	276	2.12784	2.13622	2.47086	2.6775	11.4287	8.10667
FBgn0000427	5805.23	7073.21	5938.89	16891.2	21204.6	22163.4	6272.44	20086.4	-1.67909	2.26365e-34	3.4333e-32	2022-12-01	X	7867161	7873222	-	5748	protein_coding	-	-	6356	7556	5903	16966	18157	22558	52.598	62.7748	53.3477	155.075	196.17	203.567
FBgn0053532	36.5339	12.1694	38.231	80.6429	92.26	94.3205	28.9781	89.0745	-1.62189	5.31245e-05	0.000326595	lectin-37Da	2L	19418317	19419029	+	651	protein_coding	-	Lectin_C	40	13	38	81	79	96	2.92268	0.953614	3.03223	6.53706	7.53616	7.64917
FBgn0002939	19.1803	18.7221	11.0669	49.7796	37.3711	62.8803	16.3231	50.0103	-1.61413	0.00011763	0.000650321	ninaD	2L	18081628	18083608	+	1788	protein_coding	-	-	21	20	11	50	32	64	0.558668	0.534162	0.319584	1.4692	1.11144	1.85668
FBgn0003254	11.8735	9.36105	15.0912	31.8589	35.0354	43.2302	12.1086	36.7082	-1.6053	0.000320611	0.00154244	rib	2R	19270078	19281396	+	4665	protein_coding	-	BTB	13	10	15	32	30	44	0.132554	0.102367	0.167032	0.360393	0.399369	0.489244
FBgn0032069	1553.6	1107.41	889.375	2455.13	4762.48	3549.79	1183.46	3589.13	-1.60024	2.50964e-10	4.74239e-09	CG9468	2L	8777661	8781252	-	3160	protein_coding	-	-	1701	1183	884	2466	4078	3613	25.6047	17.8775	14.532	41	80.1428	59.3069
FBgn0040503	35.6205	14.9777	33.2006	123.453	42.0425	86.4605	27.9329	83.9854	-1.59211	0.000766091	0.00322525	CG7763	2R	11414510	11415462	+	892	protein_coding	-	Lectin_C	39	16	33	124	36	88	2.07971	0.856575	1.9218	7.30357	2.50635	5.11731
FBgn0086265	390.912	474.605	489.961	777.557	1637.32	1608.36	451.826	1341.08	-1.56948	1.0533e-09	1.79077e-08	psd	2L	5963087	5964951	-	1543	protein_coding	-	-	428	507	487	781	1402	1637	13.1941	15.6911	16.3954	26.5928	56.4269	55.031
FBgn0264382	8.22012	6.55273	10.0608	35.8413	16.3499	20.6326	8.27788	24.2746	-1.56042	0.00693349	0.0204772	CR43834	X	8484194	8484580	+	243	lincRNA	-	-	9	7	10	36	14	21	1.76173	1.37563	2.13773	7.78349	3.57788	4.48268
FBgn0004192	10.0468	7.48884	8.04864	32.8545	33.8676	8.84255	8.5281	25.1882	-1.55631	0.016506	0.0420103	snRNA:U2:34ABb	2L	13215839	13216030	+	192	snRNA	-	-	11	8	8	33	29	9	2.72517	1.98975	2.16445	9.03007	9.37996	2.43145
FBgn0003983	6405.3	7670.44	6333.27	11720.1	24364.8	23864.1	6803.01	19983	-1.5545	8.98255e-11	1.82292e-09	Vm34Ca	2L	13411141	13411631	-	491	protein_coding	-	-	7013	8194	6295	11772	20863	24289	679.398	796.938	665.999	1259.64	2638.76	2565.97
FBgn0020506	69.4143	52.4219	90.5472	256.863	205.541	159.166	70.7945	207.19	-1.55143	2.20386e-08	3.0905e-07	Amyrel	2R	16651095	16652699	-	1549	protein_coding	-	-	76	56	90	258	176	162	2.3338	1.72642	3.01822	8.75078	7.05611	5.42485
FBgn0083978	14.6135	14.0416	14.0851	35.8413	32.6997	55.0203	14.2467	41.1871	-1.53529	0.000385431	0.00179873	CG17672	3L	13028962	13036504	+	1483	protein_coding	-	-	16	15	14	36	28	56	0.513193	0.483015	0.490395	1.27538	1.17252	1.95871
FBgn0038943	10.9602	18.7221	27.1642	60.7311	50.2175	51.0903	18.9488	54.0129	-1.5196	0.000203642	0.0010517	CG5391	3R	22333088	22334150	-	782	protein_coding	-	-	12	20	27	61	43	52	0.729922	1.22133	1.79356	4.09828	3.41481	3.44922
FBgn0039686	11.8735	8.42494	4.02432	23.8942	16.3499	29.4752	8.10759	23.2397	-1.51514	0.0109709	0.0299034	CG15506	3R	29718663	29722388	+	1471	protein_coding	-	-	13	9	4	24	14	30	0.420371	0.292173	0.141256	0.85719	0.591044	1.05787
