# Supplementary material for: Auxin exposure disrupts feeding behavior and fatty acid metabolism in adult Drosophila
Source: eLife. 2024 Jan 19;12:RP91953. doi: 10.7554/eLife.91953 (PMC10945601; doi:10.7554/eLife.91953)
Supplement: Figure 3—figure supplement 1—source data 2. [file elife-91953-fig3-figsupp1-data2.xlsx]

## Sheet: Sheet1
gene_id	Ore_10_m_1	Ore_10_m_2	Ore_10_m_3	Ore_0_m_1	Ore_0_m_2	Ore_0_m_3	WT_m_10	WT_m	log2FoldChange	pvalue	padj	gene_name	gene_chr	gene_start	gene_end	gene_strand	gene_length	gene_biotype	gene_description	tf_family	Ore_10_m_1_count	Ore_10_m_2_count	Ore_10_m_3_count	Ore_0_m_1_count	Ore_0_m_2_count	Ore_0_m_3_count	Ore_10_m_1_fpkm	Ore_10_m_2_fpkm	Ore_10_m_3_fpkm	Ore_0_m_1_fpkm	Ore_0_m_2_fpkm	Ore_0_m_3_fpkm
FBgn0036727	1730.7	1865.65	1634.72	654.669	580.112	611.765	1743.69	615.515	1.50392	1.77574e-64	2.44945e-62	CG7589	3L	17470127	17474517	+	2249	protein_coding	-	Neur_chan_LBD	1896	2531	1438	593	539	564	41.8524	45.6255	39.6958	15.3718	13.6769	14.5508
FBgn0264564	24.646	27.2734	29.5569	14.3519	3.22883	10.8469	27.1588	9.47588	1.52034	0.00414039	0.020663	CR43936	2L	11840455	11840913	-	439	lincRNA	-	-	27	37	26	13	3	10	3.05331	3.41698	3.67692	1.72639	0.389983	1.3217
FBgn0033302	1986.29	1861.96	1881.41	669.02	648.994	638.882	1909.89	652.299	1.54988	4.10848e-83	9.14071e-81	Cyp6a14	2R	8564187	8567202	-	2959	protein_coding	-	p450	2176	2526	1655	606	603	589	36.5077	34.6093	34.7239	11.9396	11.6295	11.5496
FBgn0266966	14.6051	25.0621	21.5993	6.62397	6.45765	7.59283	20.4221	6.89148	1.57083	0.00746642	0.0340244	CR45417	3L	6728201	6728701	+	501	lincRNA	-	-	16	34	19	6	6	7	1.58545	2.75135	2.35446	0.698191	0.683444	0.810693
FBgn0013772	2150.59	2220.94	1855.26	784.94	585.494	723.488	2075.6	697.974	1.57373	3.71365e-51	3.79452e-49	Cyp6a8	2R	14887171	14889010	-	1781	protein_coding	-	p450	2356	3013	1632	711	544	667	65.6723	68.5867	56.8894	23.2737	17.4311	21.7299
FBgn0015037	4872.61	4983.67	4815.5	1579.82	1713.43	1616.19	4890.59	1636.48	1.57955	1.60112e-127	7.6158e-125	Cyp4p1	2R	9240041	9242139	+	1680	protein_coding	-	p450	5338	6761	4236	1431	1592	1490	157.739	163.157	156.539	49.6582	54.0783	51.4604
FBgn0013710	57.5074	53.0726	62.5242	22.0799	20.4492	15.1857	57.7014	19.2383	1.5812	7.02976e-06	6.85774e-05	mt:tRNA:Y	dmel_mitochondrion_genome	1403	1468	-	66	tRNA	-	-	63	72	55	20	19	14	47.3879	44.2276	51.7361	17.6663	16.4285	12.3078
FBgn0036681	38.3383	38.3302	20.4625	12.1439	13.9916	6.50814	32.377	10.8812	1.58507	0.00124809	0.00744597	Obp73a	3L	16944423	16945878	+	780	protein_coding	-	-	42	52	18	11	13	6	2.67316	2.7028	1.43269	0.822164	0.951126	0.446326
FBgn0038353	16823.2	13508.5	14171.4	4390.58	5816.19	4579.56	14834.3	4928.78	1.58956	3.82102e-58	4.66435e-56	CG5399	3R	15695241	15697142	+	1546	protein_coding	-	-	18430	18326	12466	3977	5404	4222	591.816	480.577	500.602	149.971	199.478	158.455
FBgn0266217	23.7332	15.4795	23.8729	7.72796	8.6102	4.33876	21.0285	6.89231	1.60001	0.00647723	0.030195	CR44912	2L	2427050	2427881	-	832	lincRNA	-	-	26	21	21	7	8	4	1.55139	1.02329	1.56701	0.490496	0.548727	0.278954
FBgn0031148	2530.33	2251.16	2557.81	829.1	786.757	782.061	2446.43	799.306	1.61285	1.43668e-86	3.6032e-84	Cbs	X	21045138	21049096	+	2202	protein_coding	-	PALP	2772	3054	2250	751	731	721	62.4952	56.2285	63.4367	19.8831	18.9448	18.9983
FBgn0267153	22.8204	26.5363	23.8729	6.62397	13.9916	3.25407	24.4099	7.95654	1.61742	0.00423693	0.0211066	CR45593	3R	6761513	6763478	-	1406	lincRNA	-	-	25	36	21	6	13	3	0.882726	1.03806	0.927276	0.248786	0.527652	0.123803
FBgn0264295	230.942	160.692	170.521	75.0716	55.9663	50.9804	187.385	60.6728	1.62729	4.25131e-13	9.45848e-12	CG43773	2L	4007690	4007984	+	295	protein_coding	-	-	253	218	150	68	52	47	42.5765	29.9598	31.5678	13.4384	10.0594	9.24425
FBgn0037563	1678.67	1750.66	1750.68	613.821	553.205	506.55	1726.67	557.859	1.63026	1.51669e-74	2.71704e-72	CG11672	3R	8289395	8290578	-	1122	protein_coding	-	-	1839	2375	1540	556	514	467	81.3692	85.8174	85.2125	28.8897	26.1433	24.1502
FBgn0265066	28.2973	22.8507	19.3257	2.20799	15.0679	5.42345	23.4912	7.56643	1.63323	0.00674183	0.0312699	CR44177	3R	14496378	14508987	+	931	lincRNA	-	-	31	31	17	2	14	5	1.65304	1.34995	1.13364	0.125239	0.858159	0.311613
FBgn0036589	454.582	740.806	458.132	172.223	178.662	182.228	551.173	177.704	1.63742	2.25091e-21	8.62472e-20	CG13067	3L	16271282	16271918	+	564	protein_coding	-	-	498	1005	403	156	166	168	43.835	72.2423	44.361	16.1252	16.7965	17.2833
FBgn0035313	101.323	85.5059	67.0714	23.1839	33.3645	24.9479	84.6333	27.1654	1.64334	8.96808e-08	1.17035e-06	CG13810	3L	2185930	2187676	+	1552	protein_coding	-	-	111	116	59	21	31	23	3.5506	3.0302	2.36013	0.788838	1.13988	0.859869
FBgn0259716	1161.1	1142.54	1158.4	341.134	371.315	393.742	1154.01	368.731	1.64557	6.12088e-66	8.79494e-64	CG42370	2L	6383435	6385512	-	2078	protein_coding	-	-	1272	1550	1019	309	345	363	30.3887	30.2406	30.4442	8.66909	9.47464	10.1358
FBgn0263080	854.396	642.769	635.473	225.215	252.925	201.752	710.879	226.631	1.64945	2.00336e-32	1.26763e-30	CG43348	2L	1199412	1199924	+	513	protein_coding	-	-	936	872	559	204	235	186	90.5794	68.9134	67.6503	23.1832	26.1421	21.0374
FBgn0267763	69.374	42.0158	75.029	12.1439	26.9069	19.5244	62.1396	19.5251	1.65833	1.20214e-05	0.000112118	CR46094	3R	24573770	24574304	+	535	lincRNA	-	-	76	57	66	11	25	18	7.0523	4.31942	7.65888	1.19867	2.66671	1.95216
FBgn0039872	6765.79	7034.34	6529.8	2007.06	2163.31	2260.49	6776.64	2143.62	1.66077	1.39732e-131	7.4133e-129	salt	3R	31751825	31754705	-	2114	protein_coding	-	-	7412	9543	5744	1818	2010	2084	174.061	183.014	168.688	50.136	54.2601	57.199
FBgn0000565	1446.81	3081.16	1524.45	654.669	669.443	586.817	2017.48	636.976	1.66361	5.22281e-06	5.21298e-05	Eip71CD	3L	15511052	15513202	+	1354	protein_coding	-	PMSR	1585	4180	1341	593	622	541	58.1141	125.159	61.4873	25.5327	26.2157	23.1833
FBgn0034391	30.1229	17.6909	29.5569	13.2479	5.38138	5.42345	25.7902	8.01759	1.67935	0.00263834	0.0140895	CG15080	2R	18783299	18794594	+	5546	protein_coding	-	-	33	24	26	12	5	5	0.295396	0.175443	0.291051	0.126143	0.0514493	0.0523102
FBgn0040503	163.394	148.898	170.521	55.1997	52.7375	41.2182	160.938	49.7185	1.69209	2.17251e-14	5.38018e-13	CG7763	2R	11414510	11415462	+	892	protein_coding	-	Lectin_C	179	202	150	50	49	38	9.96229	9.18103	10.44	3.26788	3.13488	2.47181
FBgn0027558	1676.84	1367.36	1514.22	430.558	557.511	400.251	1519.47	462.773	1.71429	4.11252e-49	3.93945e-47	pgant3	2R	7057654	7061732	-	2884	protein_coding	-	Glycos_transf_2	1837	1855	1332	390	518	369	31.6217	26.0767	28.6737	7.88369	10.25	7.42381
FBgn0032805	325.875	266.837	314.895	91.6315	120.543	61.8273	302.536	91.3339	1.72539	1.44659e-18	4.73974e-17	CG10337	2L	19545376	19546959	-	1297	protein_coding	-	Cytochrom_B561	357	362	277	83	112	57	13.6647	11.3155	13.2591	3.73077	4.92796	2.54994
FBgn0003961	9166.5	10418.5	8864.79	3008.38	2684.23	2866.84	9483.25	2853.15	1.7333	3.1157e-117	1.30236e-114	Uro	2L	7780085	7781415	+	1262	protein_coding	-	-	10042	14134	7798	2725	2494	2643	395.032	454.057	383.618	125.883	112.779	121.516
FBgn0032381	6054.71	5537.24	5722.67	1599.69	1683.29	1836.38	5771.54	1706.45	1.75775	1.06026e-130	5.41674e-128	Mal-B1	2L	11847226	11849169	+	1814	protein_coding	-	-	6633	7512	5034	1449	1564	1693	181.528	167.889	172.286	46.5684	49.2027	54.1521
FBgn0010038	734.817	771.765	807.131	268.271	207.721	199.583	771.237	225.192	1.77606	6.44269e-47	5.84674e-45	GstD2	3R	12371971	12372704	+	734	protein_coding	-	GST_N	805	1047	710	243	193	184	54.4466	57.8303	60.0534	19.3006	15.0055	14.5451
FBgn0002869	33.7742	84.0317	36.3777	6.62397	25.8306	11.9316	51.3945	14.7954	1.80554	0.00017192	0.00126411	MtnB	3R	20503102	20503746	-	584	protein_coding	-	-	37	114	32	6	24	11	3.14528	7.91401	3.40183	0.598961	2.34524	1.09289
FBgn0038595	197.168	179.857	213.719	66.2397	51.6612	48.811	196.915	55.5706	1.82263	2.36932e-18	7.65396e-17	CG7142	3R	18278181	18279522	-	1342	protein_coding	-	Trypsin	216	244	188	60	48	45	7.99047	7.37127	8.69722	2.60651	2.04116	1.94561
FBgn0037485	2421.7	1749.19	2045.11	656.877	506.926	556.446	2072	573.416	1.85304	1.07565e-56	1.26817e-54	CG14606	3R	7214339	7217083	-	1925	protein_coding	-	Sugar_tr	2653	2373	1799	595	471	513	68.4191	49.9772	58.0197	18.0197	13.963	15.4626
FBgn0031470	90.3688	79.609	184.162	39.7438	35.5171	20.6091	118.047	31.9567	1.87483	2.37968e-08	3.34953e-07	CG18557	2L	2844601	2845734	-	1073	protein_coding	-	Trypsin	99	108	162	36	33	19	4.58043	4.08064	9.37326	1.95597	1.75511	1.02742
FBgn0039137	2040.14	1578.17	1858.67	484.653	504.773	500.042	1825.66	496.49	1.87739	3.22766e-76	5.93631e-74	CG13604	3R	23988806	23992916	-	3259	protein_coding	-	UBA	2235	2141	1635	439	469	461	34.0459	26.634	31.1465	7.85309	8.21255	8.20753
FBgn0028519	1585.56	1790.46	1710.89	437.182	527.375	417.606	1695.64	460.721	1.87994	7.83896e-80	1.56711e-77	CG4500	2L	14027001	14029368	+	2206	protein_coding	-	AMP-binding	1737	2429	1505	396	490	385	39.09	44.6403	42.3552	10.4653	12.6759	10.1263
FBgn0010043	143.312	196.811	103.449	45.2638	34.4408	41.2182	147.857	40.3076	1.88531	3.06474e-12	6.25371e-11	GstD7	3R	12378500	12379255	+	756	protein_coding	-	GST_N	157	267	91	41	32	38	10.3098	14.3184	7.473	3.16171	2.41556	2.91647
FBgn0040251	31.0357	30.959	43.1985	8.83195	9.68648	9.76221	35.0644	9.42688	1.88641	6.82568e-05	0.00054836	Ugt86Di	3R	11151026	11153849	-	2556	protein_coding	-	UDPGT	34	42	38	8	9	9	0.660373	0.666182	0.922992	0.182469	0.200942	0.204304
FBgn0264549	82.1534	44.9643	97.7651	11.0399	32.2883	15.1857	74.9609	19.5046	1.93003	1.16404e-06	1.30649e-05	CR43928	2L	3476343	3477648	+	1241	lincRNA	-	-	90	61	86	10	30	14	3.60033	1.9928	4.30231	0.469774	1.37955	0.654564
FBgn0266431	62.9843	61.181	67.0714	18.7679	18.2967	13.0163	63.7456	16.6936	1.93126	4.85196e-08	6.51684e-07	CG45061	X	9871098	9871702	-	493	protein_coding	-	-	69	83	59	17	17	12	6.94821	6.82552	7.42986	2.01031	1.96785	1.41231
FBgn0032535	25.5588	36.1189	30.6937	8.83195	9.68648	5.42345	30.7905	7.98063	1.95169	0.00013928	0.00104415	Ance-2	2L	13909333	13911719	+	2222	protein_coding	-	Peptidase_M2	28	49	27	8	9	5	0.625583	0.89404	0.754388	0.209897	0.231147	0.130564
FBgn0022700	1758.08	1401.26	1273.22	402.958	356.247	355.778	1477.52	371.661	1.99213	9.23368e-64	1.26108e-61	Cht4	2R	21065379	21067087	-	1473	protein_coding	-	CBM_14	1926	1901	1120	365	331	328	64.9119	52.322	47.2053	14.4461	12.8237	12.9201
FBgn0063499	548.602	504.19	430.849	123.647	109.78	122.57	494.547	118.666	2.062	7.39835e-44	6.29956e-42	GstE10	2R	18396638	18398519	-	1134	protein_coding	-	-	601	684	379	112	102	113	26.3107	24.4539	20.7492	5.75792	5.13306	5.78178
FBgn0032706	2865.33	2760.51	2494.15	713.18	562.892	610.68	2706.66	628.918	2.10662	1.50534e-112	5.93275e-110	Irk3	2L	18711071	18713748	-	2096	protein_coding	-	-	3139	3745	2194	646	523	563	74.3483	72.4378	64.9861	17.9681	14.2397	15.5852
FBgn0036607	17.3435	14.7424	25.0097	5.51997	3.22883	4.33876	19.0319	4.36252	2.11461	0.00159444	0.00918704	CG13059	3L	16323672	16324308	+	572	protein_coding	-	-	19	20	22	5	3	4	1.64903	1.41755	2.38782	0.509606	0.299305	0.405751
FBgn0020880	20.9948	19.1651	21.5993	6.62397	5.38138	2.16938	20.5864	4.72491	2.12238	0.000958783	0.00585715	CG7179	2L	7775804	7778029	-	2226	protein_coding	-	CUB	23	26	19	6	5	2	0.512948	0.473536	0.529912	0.15714	0.128184	0.0521316
FBgn0267171	25.5588	22.8507	9.09443	4.41598	5.38138	3.25407	19.168	4.35047	2.15402	0.00185806	0.010385	CR45611	X	21373635	21374417	-	783	lincRNA	-	-	28	31	8	4	5	3	1.77528	1.60511	0.634313	0.297823	0.364416	0.222308
FBgn0265266	87.6303	98.0369	80.7131	14.3519	21.5255	22.7785	88.7934	19.552	2.18573	7.13624e-12	1.41636e-10	CG13639	3R	24859900	24860366	-	467	protein_coding	-	-	96	133	71	13	20	21	10.2053	11.5462	9.4388	1.62288	2.44401	2.60915
FBgn0260434	11.8666	21.3765	18.1889	4.41598	0	6.50814	17.144	3.64137	2.2413	0.00314934	0.01635	CG42529	3L	19728994	19730402	+	1409	protein_coding	-	-	13	29	16	4	0	6	0.45804	0.834434	0.704992	0.165504	0	0.247079
FBgn0029681	174.348	168.8	154.605	51.8877	26.9069	24.9479	165.918	34.5808	2.26654	1.46194e-18	4.77868e-17	CG15239	X	3884168	3890486	+	1997	protein_coding	-	-	191	229	136	47	25	23	4.74817	4.64903	4.22801	1.37208	0.714416	0.66826
FBgn0053542	41.0767	46.4386	67.0714	12.1439	11.839	7.59283	51.5289	10.5253	2.28353	1.2743e-07	1.63058e-06	upd3	X	18277233	18284596	+	2221	protein_coding	-	-	45	63	59	11	11	7	1.00585	1.15	1.64922	0.288738	0.28264	0.182871
FBgn0036468	62.0715	60.4438	19.3257	9.93595	7.53393	11.9316	47.2803	9.80049	2.2843	4.50316e-06	4.54068e-05	CG13461	3L	15051931	15052490	-	560	protein_coding	-	-	68	82	17	9	7	11	6.02826	5.9365	1.88467	0.936947	0.713345	1.13973
FBgn0266279	20.9948	24.325	19.3257	3.31198	6.45765	3.25407	21.5485	4.34123	2.31418	0.000344225	0.00234945	CR44964	X	6746399	6748020	-	1556	lincRNA	-	-	23	33	17	3	6	3	0.73382	0.859823	0.678289	0.112401	0.220055	0.111868
FBgn0040262	101.323	126.048	120.501	28.7038	21.5255	19.5244	115.957	23.2513	2.32032	8.66664e-16	2.39574e-14	Ugt36Ba	2L	16794211	16796009	+	1799	protein_coding	-	UDPGT	111	171	106	26	20	18	3.06311	3.85363	3.65805	0.842563	0.634437	0.580547
FBgn0038873	18.2563	8.10832	20.4625	5.51997	1.07628	2.16938	15.609	2.92188	2.40801	0.00299711	0.0156934	CG5892	3R	21242618	21245418	+	2329	protein_coding	-	-	20	11	18	5	1	2	0.426316	0.191482	0.47982	0.125159	0.024503	0.049826
FBgn0004431	79.415	70.0264	53.4298	16.5599	13.9916	7.59283	67.6237	12.7148	2.41733	5.06137e-10	8.48318e-09	LysX	3L	1194739	1195302	-	564	protein_coding	-	-	87	95	47	15	13	7	7.65793	6.82888	5.17361	1.5505	1.31539	0.720137
FBgn0033353	22.8204	19.9022	39.7881	6.62397	4.3051	3.25407	27.5036	4.72771	2.52797	4.26556e-05	0.000358775	CG13749	2R	8933423	8934445	+	897	protein_coding	-	-	25	27	35	6	4	3	1.38363	1.22033	2.42243	0.389959	0.254482	0.194055
FBgn0038973	1560	2461.98	1267.54	246.191	421.9	245.14	1763.17	304.41	2.53432	6.12529e-11	1.12807e-09	Pebp1	3R	22466034	22466679	+	646	protein_coding	-	-	1709	3340	1115	223	392	226	131.335	209.613	107.156	20.1249	34.6292	20.2989
FBgn0031412	290.275	288.951	220.54	28.7038	64.5765	40.1335	266.589	44.4713	2.5847	7.14025e-29	3.93971e-27	CG16995	2L	2307948	2308872	+	721	protein_coding	-	SCP	318	392	194	26	60	37	21.8959	22.0422	16.7048	2.10232	4.74903	2.97757
FBgn0031801	10342.2	10711.8	10224.4	1858.02	1657.46	1680.18	10426.1	1731.89	2.59008	0	0	CG9498	2L	6349393	6351034	-	1514	protein_coding	-	-	11330	14532	8994	1683	1540	1549	371.514	389.139	368.81	64.8065	58.0476	59.3638
FBgn0053509	589.679	622.129	605.916	115.919	86.102	98.7068	605.908	100.243	2.59704	1.66611e-74	2.94645e-72	CG33509	2L	21084605	21086506	-	1405	protein_coding	-	-	646	844	533	105	80	91	22.8259	24.354	23.5519	4.35686	3.2494	3.75804
FBgn0264987	241.896	298.534	236.455	49.6797	37.6696	39.0488	258.962	42.1327	2.62485	7.17597e-35	4.94927e-33	CR44138	3R	13376903	13377395	+	493	lincRNA	-	-	265	405	208	45	35	36	26.6852	33.3053	26.1934	5.3214	4.05145	4.23693
FBgn0082988	15.5179	6.63408	12.5048	2.20799	0	3.25407	11.5523	1.82069	2.65959	0.00616312	0.029015	snoRNA:Psi28S-2442b	3R	5598423	5598566	-	144	snoRNA	-	-	17	9	11	2	0	3	5.86081	2.53387	4.74248	0.809707	0	1.2088
FBgn0034160	179.825	187.966	92.0811	25.3919	21.5255	26.0326	153.29	24.3166	2.66495	2.9513e-18	9.48957e-17	CG5550	2R	16816589	16817577	+	938	protein_coding	-	Fibrinogen_C	197	255	81	23	20	24	10.4264	11.0215	5.36114	1.4295	1.21679	1.48458
FBgn0263402	46.5536	54.5469	48.8826	5.51997	8.6102	8.67752	49.9943	7.60256	2.71764	3.05621e-09	4.72617e-08	CG43448	3R	30237094	30237734	-	529	protein_coding	-	-	51	74	43	5	8	8	4.78614	5.67128	5.04647	0.551029	0.863026	0.877466
FBgn0038914	14.6051	50.1242	36.3777	9.93595	2.15255	3.25407	33.7023	5.11419	2.73104	1.69475e-05	0.000154817	fit	3R	21883924	21884454	-	531	protein_coding	-	-	16	68	32	9	2	3	1.49588	5.19181	3.74137	0.988117	0.214944	0.32781
FBgn0038731	1326.32	1416.74	1349.39	162.287	177.585	213.684	1364.15	184.519	2.88623	9.18286e-149	6.03183e-146	CG11659	3R	19775459	19777280	-	1705	protein_coding	-	AMP-binding	1453	1922	1187	147	165	197	42.307	45.7018	43.2217	5.02636	5.52267	6.70406
FBgn0033215	189.866	257.255	148.921	30.9118	24.7543	23.8632	198.681	26.5098	2.91426	5.98357e-27	3.05694e-25	CG1942	2R	7712578	7714182	+	1305	protein_coding	-	-	208	349	131	28	23	22	7.91269	10.8423	6.23212	1.25086	1.00579	0.978156
FBgn0034711	6636.17	5871.16	6610.51	1000.22	669.443	805.925	6372.61	825.195	2.94924	1.33504e-173	1.15097e-170	CG3290	2R	22206005	22207987	-	1762	protein_coding	-	-	7270	7965	5815	906	622	743	204.833	183.267	204.889	29.9766	20.1453	24.4669
FBgn0033981	6732.93	7344.66	5824.98	938.395	713.571	881.853	6634.19	844.606	2.97434	1.14842e-196	1.21856e-193	Cyp6a21	2R	14885264	14886947	-	1631	protein_coding	-	p450	7376	9964	5124	850	663	813	224.511	247.676	195.043	30.3826	23.1979	28.9223
FBgn0052279	41.9895	40.5416	11.368	2.20799	4.3051	5.42345	31.2997	3.97885	2.98778	7.61201e-06	7.37879e-05	Drsl2	3L	3314349	3314681	+	333	protein_coding	-	-	46	55	10	2	4	5	6.8578	6.69612	1.86437	0.350144	0.685496	0.871208
FBgn0051272	4560.43	4432.3	4105	535.437	588.723	496.788	4365.91	540.316	3.0147	1.30775e-291	3.00652e-288	CG31272	3R	10756296	10759398	-	2102	protein_coding	-	MFS_1	4996	6013	3611	485	547	458	117.994	115.975	106.652	13.4515	14.8506	12.6424
FBgn0038730	501.136	428.267	436.533	40.8478	35.5171	65.0814	455.312	47.1488	3.27132	1.71212e-65	2.4099e-63	CG6300	3R	19771382	19773225	-	1724	protein_coding	-	AMP-binding	549	581	384	37	33	60	15.8091	13.6629	13.8283	1.25119	1.09236	2.01934
FBgn0035176	6627.96	5804.82	5080.38	343.342	658.68	419.775	5837.72	473.933	3.62256	7.41398e-32	4.56556e-30	CG13905	3L	902898	903810	+	913	protein_coding	-	-	7261	7875	4469	311	612	387	394.818	349.691	303.889	19.8587	38.2534	24.5944
FBgn0053983	43.8152	42.753	67.0714	6.62397	4.3051	0	51.2132	3.64302	3.8099	1.32966e-10	2.36662e-09	obst-H	3L	15528265	15529243	-	915	protein_coding	-	CBM_14	48	58	59	6	4	0	2.6043	2.56987	4.00319	0.382288	0.249476	0
FBgn0039091	121.404	228.507	82.9867	15.4559	7.53393	7.59283	144.299	10.1942	3.83561	1.35326e-20	4.96459e-19	CG10182	3R	23587120	23589819	-	2212	protein_coding	-	-	133	310	73	14	7	7	2.98495	5.68174	2.04886	0.36898	0.180594	0.183615
FBgn0040261	53.8561	33.9075	37.5145	4.41598	0	2.16938	41.7594	2.19512	4.25879	2.77466e-09	4.32471e-08	Ugt36Bb	2L	16796595	16798273	+	1620	protein_coding	-	UDPGT	59	46	33	4	0	2	1.80804	1.15119	1.26466	0.143948	0	0.0716326
FBgn0052198	457.321	345.709	425.165	26.4959	11.839	19.5244	409.398	19.2864	4.4091	5.52608e-69	8.66213e-67	CG32198	3L	18526976	18527445	+	470	protein_coding	-	-	501	469	374	24	11	18	52.9189	40.4557	49.4025	2.97697	1.33562	2.22214
FBgn0085246	45.6408	84.7688	60.2506	1.10399	0	2.16938	63.5534	1.09112	5.87329	8.08481e-11	1.47321e-09	CG34217	2R	8227990	8228727	-	738	protein_coding	-	-	50	115	53	1	0	2	3.36345	6.31751	4.45856	0.0789958	0	0.157242
FBgn0031654	1.82563	18.428	3.41041	1849.19	2137.48	1556.53	7.88801	1847.73	-7.83582	1.4695e-19	5.10587e-18	Jon25Bii	2L	4952243	4953136	-	894	protein_coding	-	Trypsin	2	25	3	1675	1986	1435	0.111061	1.13372	0.208333	109.229	126.774	93.1344
FBgn0020906	7.30253	56.0211	4.54721	4463.45	4280.35	3292.03	22.6236	4011.94	-7.45932	2.57376e-12	5.33588e-11	Jon25Bi	2L	4954279	4955144	-	866	protein_coding	-	Trypsin	8	76	4	4043	3977	3035	0.45861	3.55796	0.286759	272.174	262.076	203.347
FBgn0030098	4.56408	2.21136	4.54721	442.702	556.434	547.768	3.77422	515.635	-7.15824	7.19535e-60	9.19006e-58	CG12057	X	9191657	9192548	+	892	protein_coding	-	-	5	3	4	401	517	505	0.278276	0.136352	0.278401	26.2084	33.0762	32.849
FBgn0035667	10.041	33.9075	14.7784	2404.5	2506.65	1976.3	19.5756	2295.82	-6.84955	3.568e-47	3.2594e-45	Jon65Ai	3L	6053493	6054443	-	951	protein_coding	-	Trypsin	11	46	13	2178	2329	1822	0.574226	1.96102	0.848669	133.517	139.759	111.164
FBgn0031653	21.9076	45.7014	22.7361	3587.98	2513.1	3273.59	30.115	3124.89	-6.67551	5.81358e-78	1.11379e-75	Jon25Biii	2L	4949941	4950767	-	827	protein_coding	-	Trypsin	24	62	20	3250	2335	3018	1.44071	3.03942	1.50141	229.107	161.128	211.743
FBgn0085358	0.912816	13.2682	0	539.853	439.12	482.687	4.72699	487.22	-6.64929	7.37408e-07	8.4624e-06	Diedel3	X	19050442	19053160	+	2719	protein_coding	-	-	1	18	0	489	408	445	0.0182584	0.268391	0	10.4848	8.56328	9.49613
FBgn0039472	1.82563	1.47424	2.27361	192.095	138.84	172.466	1.85783	167.8	-6.53905	1.94778e-25	9.01598e-24	CG17192	3R	27017180	27018287	-	1052	protein_coding	-	Lipase	2	2	2	174	129	159	0.0943812	0.077076	0.118029	9.6426	6.99783	8.76955
FBgn0036024	152.44	316.962	168.247	13622.2	13510.5	10567	212.55	12566.6	-5.88268	1.49139e-56	1.74341e-54	CG18180	3L	9641013	9641913	+	901	protein_coding	-	Trypsin	167	430	148	12339	12553	9742	9.20159	19.3486	10.1979	798.391	795.082	627.364
FBgn0002562	0	0	0	7.72796	13.9916	4.33876	0	8.6861	-5.69087	0.000141738	0.00106085	Lsp1alpha	X	12490291	12492982	+	2625	protein_coding	-	-	0	0	0	7	13	4	0	0	0	0.155464	0.28262	0.0884151
FBgn0003358	137.835	279.368	98.9019	9272.45	8222.74	8649.32	172.035	8714.84	-5.65902	8.89368e-35	6.10346e-33	Jon99Ci	3R	29925226	29926189	-	907	protein_coding	-	Trypsin	151	379	87	8399	7640	7974	8.26496	16.9409	5.95508	539.859	480.701	510.111
FBgn0002939	11.8666	8.84544	4.54721	359.902	214.179	495.703	8.41975	356.595	-5.38104	4.38874e-25	1.99139e-23	ninaD	2L	18081628	18083608	+	1788	protein_coding	-	-	13	12	4	326	199	457	0.36095	0.272094	0.138889	10.6294	6.35148	14.8301
FBgn0265900	0	0.73712	0	9.93595	12.9153	14.101	0.245707	12.3174	-5.23278	0.000154349	0.00114467	CR44689	3L	22898191	22898580	-	390	lincRNA	-	-	0	1	0	9	12	13	0	0.103954	0	1.34536	1.75593	1.93408
FBgn0032144	9.12816	75.9234	19.3257	1208.87	1127.94	1048.9	34.7924	1128.57	-5.01117	1.24835e-09	2.01165e-08	CG17633	2L	9769060	9770409	+	1350	protein_coding	-	-	10	103	17	1095	1048	967	0.367737	3.0932	0.781791	47.2869	44.3013	41.5613
FBgn0038719	23.7332	53.0726	46.609	1246.41	1238.79	1289.7	41.1383	1258.3	-4.93002	1.13605e-71	1.84361e-69	CG16727	3R	19613381	19615784	+	2014	protein_coding	-	Sugar_tr	26	72	41	1129	1151	1189	0.640892	1.44937	1.26386	32.681	32.6141	34.2546
FBgn0038718	4.56408	40.5416	20.4625	670.124	608.096	659.491	21.856	645.904	-4.87651	5.87204e-11	1.08287e-09	CG17752	3R	19610225	19612437	+	1716	protein_coding	-	Sugar_tr	5	55	18	607	565	608	0.144652	1.29942	0.651224	20.6221	18.7897	20.5581
FBgn0001285	4.56408	3.6856	1.1368	112.607	92.5597	80.267	3.12883	95.1447	-4.85854	4.90351e-21	1.84303e-19	Jon44E	2R	8691448	8692844	+	1397	protein_coding	-	Trypsin	5	5	1	102	86	74	0.177682	0.145104	0.0444405	4.25661	3.51311	3.07349
FBgn0039778	149.702	287.477	77.3026	5182.15	5415.82	4318.15	171.494	4972.04	-4.85425	2.43556e-20	8.77183e-19	Jon99Fi	3R	30488963	30489895	+	933	protein_coding	-	Trypsin	164	390	68	4694	5032	3981	8.72636	16.9468	4.52483	293.307	307.786	247.575
FBgn0039342	158.83	406.153	121.638	6137.1	5752.69	6713.15	228.874	6200.98	-4.75739	2.29988e-19	7.93115e-18	CG5107	3R	25505191	25505931	+	681	protein_coding	-	-	174	551	107	5559	5345	6189	12.6845	32.8027	9.75466	475.894	447.909	527.314
FBgn0264083	0	1.47424	0	15.4559	10.7628	17.355	0.491413	14.5246	-4.64004	0.00017729	0.00129811	CR43752	2L	8295158	8295666	+	509	lincRNA	-	-	0	2	0	14	10	16	0	0.1593	0	1.60351	1.12117	1.82389
FBgn0039777	167.045	305.168	104.586	4602.55	5072.49	4216.19	192.266	4630.41	-4.58649	1.67582e-24	7.31526e-23	Jon99Fii	3R	30487016	30487928	-	913	protein_coding	-	Trypsin	183	414	92	4169	4713	3887	9.95065	18.3838	6.25594	266.208	294.589	247.024
FBgn0003356	1129.15	1946.73	832.14	31536.7	28580.5	25693	1302.68	28603.4	-4.45604	5.06277e-32	3.15999e-30	Jon99Cii	3R	29923754	29924615	-	862	protein_coding	-	Trypsin	1237	2641	732	28566	26555	23687	71.2416	124.213	52.7204	1931.98	1758.04	1594.41
FBgn0043576	6.38971	19.1651	15.9153	384.19	234.628	278.765	13.8234	299.194	-4.4173	1.82241e-51	1.876e-49	PGRP-SC1a	2R	8709733	8710320	+	588	protein_coding	-	-	7	26	14	348	218	257	0.591006	1.79267	1.47818	34.5034	21.1577	25.3601
FBgn0003357	1241.43	2067.62	818.499	31610.7	27158.7	25852.5	1375.85	28207.3	-4.35712	2.28299e-28	1.21589e-26	Jon99Ciii	3R	29922216	29923455	+	1240	protein_coding	-	Trypsin	1360	2805	720	28633	25234	23834	54.4488	91.7098	36.0484	1346.19	1161.32	1115.25
FBgn0036996	33.7742	31.6962	40.9249	720.908	650.07	675.762	35.4651	682.247	-4.28614	1.18566e-132	6.54202e-130	mag	3L	20460683	20462274	+	1477	protein_coding	-	-	37	43	36	653	604	623	1.24363	1.1803	1.5132	25.7747	23.337	24.4739
FBgn0039471	157.917	310.327	158.016	4810.1	3371.97	3614.19	208.753	3932.09	-4.23209	1.92005e-31	1.16163e-29	CG6295	3R	27005899	27007055	-	1091	protein_coding	-	Lipase	173	421	139	4357	3133	3332	7.87213	15.6445	7.9098	232.822	163.88	177.205
FBgn0267306	1.82563	3.6856	0	28.7038	34.4408	52.0651	1.83708	38.4033	-4.23181	1.96913e-09	3.1329e-08	CR45742	3L	5334846	5335103	+	258	lincRNA	-	-	2	5	0	26	32	48	0.384841	0.785697	0	5.87508	7.07815	10.7949
FBgn0259230	0	0	3.41041	17.6639	6.45765	28.2019	1.1368	17.4412	-4.1874	9.72472e-05	0.000757441	lectin-22C	2L	2036409	2037265	-	857	protein_coding	-	Lectin_C	0	0	3	16	6	26	0	0	0.217328	1.08843	0.39954	1.76031
FBgn0010425	61.1587	174.697	62.5242	1855.81	1983.58	1450.23	99.4601	1763.21	-4.14264	1.03281e-15	2.83798e-14	epsilonTry	2R	11345237	11346066	-	830	protein_coding	-	Trypsin	67	237	55	1681	1843	1337	4.00745	11.5764	4.11396	118.073	126.717	93.4651
FBgn0051091	6.38971	9.58256	10.2312	114.815	144.221	174.635	8.7345	144.557	-4.054	2.72614e-30	1.59341e-28	CG31091	3R	25899903	25902172	+	2149	protein_coding	-	-	7	13	9	104	134	161	0.161708	0.245252	0.260005	2.82135	3.55842	4.34696
FBgn0020506	24.646	31.6962	26.1465	565.245	321.806	465.332	27.4962	450.794	-4.02211	3.54288e-67	5.2549e-65	Amyrel	2R	16651095	16652699	-	1549	protein_coding	-	-	27	43	23	512	299	429	0.865333	1.12544	0.921832	19.2699	11.0156	16.0695
FBgn0033774	65.7227	187.228	63.661	1768.6	1614.41	1650.9	105.537	1677.97	-3.98559	6.99003e-15	1.7922e-13	CG12374	2R	12762113	12763825	+	1464	protein_coding	-	-	72	254	56	1602	1500	1522	2.44153	7.03392	2.37477	63.7943	58.4709	60.3211
FBgn0032066	20.0819	44.9643	65.9346	591.741	516.612	927.41	43.6603	678.588	-3.96399	1.51076e-14	3.79589e-13	CG9463	2L	8765273	8768710	-	3198	protein_coding	-	-	22	61	58	536	480	855	0.341519	0.773314	1.12596	9.77117	8.56549	15.5126
FBgn0035666	31.9486	77.3976	22.7361	804.812	643.613	596.579	44.0274	681.668	-3.93983	3.68432e-14	8.90044e-13	Jon65Aii	3L	6052321	6053215	+	833	protein_coding	-	Trypsin	35	105	20	729	598	550	2.0859	5.11033	1.4906	51.0203	40.9681	38.3101
FBgn0052282	24.646	42.0158	46.609	591.741	534.909	581.394	37.7569	569.348	-3.92244	4.78023e-103	1.64846e-100	Drsl4	3L	3315620	3315942	+	323	protein_coding	-	-	27	57	41	536	497	536	4.14985	7.15446	7.88055	96.7437	87.8098	96.2849
FBgn0263024	0.912816	2.21136	0	13.2479	20.4492	17.355	1.04139	17.0174	-3.87101	5.13081e-05	0.000423799	CG43319	3R	27694318	27694541	+	224	protein_coding	-	-	1	3	0	12	19	16	0.221627	0.542973	0	3.12316	4.84055	4.14446
FBgn0033327	15.5179	21.3765	15.9153	300.286	215.255	269.003	17.6032	261.515	-3.86975	1.5696e-50	1.56891e-48	PGRP-SC1b	2R	8713446	8715094	+	1649	protein_coding	-	-	17	29	14	272	200	248	0.511799	0.712988	0.527087	9.61632	6.92148	8.72624
FBgn0034328	0.912816	4.42272	1.1368	37.5358	24.7543	39.0488	2.15745	33.7797	-3.8532	2.12217e-08	3.00546e-07	IM23	2R	18382704	18383235	-	468	protein_coding	-	-	1	6	1	34	23	36	0.106078	0.519769	0.132657	4.23539	2.8046	4.46326
FBgn0034942	0	0.73712	1.1368	7.72796	10.7628	5.42345	0.624641	7.97139	-3.72177	0.00550892	0.0264589	CG13566	2R	23961477	23962577	-	917	protein_coding	-	-	0	1	1	7	10	5	0	0.0442115	0.0677027	0.44503	0.622329	0.316371
FBgn0010357	2732.97	5075.07	2457.77	47490.5	45868.7	41046.8	3421.94	44802	-3.71045	1.6338e-25	7.61373e-24	betaTry	2R	11346325	11347395	+	1071	protein_coding	-	Trypsin	2994	6885	2162	43017	42618	37842	138.782	260.627	125.326	2341.59	2270.87	2050.13
FBgn0030837	32.8614	30.959	22.7361	408.478	388.535	347.101	28.8522	381.371	-3.70406	2.26687e-73	3.95813e-71	CG8661	X	17283762	17284500	-	677	protein_coding	-	-	36	42	20	370	361	320	2.63988	2.51516	1.83407	31.862	30.4304	27.4257
FBgn0037684	129.62	105.408	119.364	1275.11	1887.79	1333.08	118.131	1498.66	-3.67021	3.72947e-137	2.14351e-134	CG8129	3R	9365398	9367763	+	1727	protein_coding	-	PALP	142	143	105	1155	1754	1229	4.08194	3.35698	3.77461	38.9897	57.9598	41.291
FBgn0033065	1496.11	1714.54	1726.8	21806.1	21459.9	18945.2	1645.82	20737	-3.65554	0	0	Cyp6w1	2R	6173684	6176195	+	2392	protein_coding	-	p450	1639	2326	1519	19752	19939	17466	34.0164	39.4233	39.425	481.405	475.698	423.67
FBgn0259971	5.47689	4.42272	1.1368	36.4318	49.5087	58.5732	3.67881	48.1712	-3.64706	3.89204e-11	7.27464e-10	CG42481	3L	13298797	13299023	-	227	protein_coding	-	-	6	6	1	33	46	54	1.31219	1.07159	0.273495	8.47517	11.5644	13.8027
FBgn0030756	15.5179	18.428	5.68402	165.599	174.357	160.534	13.21	166.83	-3.59091	3.31711e-33	2.14818e-31	CG9903	X	16539153	16540852	-	1628	protein_coding	-	-	17	25	5	150	162	148	0.518401	0.622573	0.190674	5.37152	5.67871	5.27477
FBgn0259998	174.348	358.977	134.143	2560.16	2507.72	2395	222.489	2487.63	-3.47971	1.84304e-16	5.32974e-15	CG17571	2L	20255988	20257192	-	1205	protein_coding	-	Trypsin	191	487	118	2319	2330	2208	7.86896	16.385	6.07953	112.195	110.346	106.318
FBgn0030859	108.625	212.291	95.4915	1623.98	1486.34	1516.4	138.802	1542.24	-3.46795	1.97455e-22	7.89476e-21	CG12990	X	17669208	17671888	-	2330	protein_coding	-	-	119	288	84	1471	1381	1398	2.53549	5.0112	2.2382	36.8059	33.8242	34.8135
FBgn0003863	4263.76	6940.72	3860.59	57200.1	56871.5	51351.4	5021.69	55141	-3.45668	1.47461e-34	1.00201e-32	alphaTry	2R	11344260	11345119	-	860	protein_coding	-	Trypsin	4671	9416	3396	51812	52841	47342	269.639	443.887	245.157	3512.31	3506.4	3194.07
FBgn0054040	233.681	305.168	237.592	2581.14	3036.17	2895.04	258.813	2837.45	-3.44478	2.93296e-237	4.49525e-234	CG34040	2R	21832501	21833551	-	980	protein_coding	-	-	256	414	209	2338	2821	2669	12.9684	17.1269	13.2402	139.085	164.273	158.022
FBgn0032049	337.742	815.992	326.263	5853.38	4622.6	5564.46	493.332	5346.81	-3.43678	2.13887e-14	5.31596e-13	Bace	2L	8494893	8496307	-	1415	protein_coding	-	Asp	370	1107	287	5302	4295	5130	12.9812	31.7173	12.5922	218.446	173.219	210.357
FBgn0261575	4146.92	6144.63	3927.66	50128	52750.4	50960.9	4739.74	51279.8	-3.43524	3.60006e-57	4.28097e-55	tobi	3R	25344761	25346921	-	2104	protein_coding	-	Glyco_hydro_31	4543	8336	3455	45406	49012	46982	107.193	160.626	101.948	1258.14	1329.37	1295.63
FBgn0011556	34.687	44.9643	31.8305	494.589	349.789	377.472	37.1606	407.284	-3.43227	2.09923e-63	2.83889e-61	zetaTry	2R	11339186	11340132	-	947	protein_coding	-	Trypsin	38	61	28	448	325	348	1.99207	2.61147	1.83562	27.5796	19.585	21.3219
FBgn0050287	0	1.47424	1.1368	11.0399	6.45765	10.8469	0.870348	9.44816	-3.40873	0.00329939	0.0170265	CG30287	2R	21536894	21538015	-	955	protein_coding	-	Trypsin	0	2	1	10	6	10	0	0.0849046	0.0650088	0.61046	0.35854	0.607565
FBgn0250815	2339.55	4848.04	2111.04	33240.2	34477.4	29189	3099.54	32302.2	-3.38129	3.20395e-16	9.09369e-15	Jon65Aiv	3L	6039155	6040135	+	904	protein_coding	-	Trypsin	2563	6577	1857	30109	32034	26910	140.751	294.961	127.532	1941.73	2022.24	1727.19
FBgn0266247	0.912816	0.73712	2.27361	8.83195	16.1441	13.0163	1.30785	12.6641	-3.36518	0.000686027	0.00436287	CR44942	3R	12618876	12619428	-	422	lincRNA	-	-	1	1	2	8	15	12	0.117641	0.096071	0.294234	1.10519	2.02847	1.64993
FBgn0011694	494.746	1828.79	811.678	9719.56	10338.7	11150.6	1045.07	10403	-3.31495	2.85568e-09	4.43097e-08	PebII	2R	25173568	25174230	-	608	protein_coding	-	-	542	2481	714	8804	9606	10280	44.2555	165.435	72.9071	844.184	901.63	981.037
FBgn0033296	1708.79	2232.74	1785.92	17689.3	19428.9	19785.8	1909.15	18968	-3.31064	0	0	Mal-A7	2R	8468646	8471663	-	2717	protein_coding	-	-	1872	3029	1571	16023	18052	18241	34.2048	45.1975	35.8973	343.807	379.162	389.543
FBgn0023197	587.853	1016.49	554.76	7941.03	6070.19	6357.37	719.701	6789.53	-3.23674	8.37402e-24	3.54329e-22	Jon74E	3L	17546739	17549127	-	1553	protein_coding	-	Trypsin	644	1379	488	7193	5640	5861	20.5866	35.9996	19.5085	270.022	207.251	218.976
FBgn0044812	0	0.73712	3.41041	5.51997	16.1441	13.0163	1.38251	11.5601	-3.20137	0.00219996	0.0119898	TotC	3R	20872988	20873580	+	530	protein_coding	-	-	0	1	3	5	15	12	0	0.0764943	0.351415	0.54999	1.61512	1.31372
FBgn0011555	92.1944	287.477	94.3547	1384.41	1615.49	1321.15	158.009	1440.35	-3.18512	7.08241e-09	1.05388e-07	thetaTry	2R	11341714	11342760	-	1047	protein_coding	-	Trypsin	101	390	83	1254	1501	1218	4.78901	15.1016	4.9216	69.8251	81.8132	67.4989
FBgn0032282	4.56408	5.89696	17.0521	98.2555	58.1189	80.267	9.17103	78.8805	-3.18134	6.27773e-14	1.48789e-12	CG7299	2L	10683427	10684409	-	983	protein_coding	-	-	5	8	15	89	54	74	0.252515	0.329945	0.947356	5.27833	3.13494	4.36791
FBgn0033297	1063.43	1592.18	1140.21	10971.5	11482.8	11883.9	1265.27	11446	-3.17635	1.14655e-62	1.53548e-60	Mal-A8	2R	8471954	8473961	+	1814	protein_coding	-	-	1165	2160	1003	9938	10669	10956	31.883	48.2749	34.3272	319.391	335.642	350.438
FBgn0036738	222.727	350.869	143.237	2290.79	1822.13	2270.26	238.944	2127.73	-3.15125	6.63354e-17	1.98488e-15	CG7542	3L	17549826	17550980	+	1155	protein_coding	-	Trypsin	244	476	126	2075	1693	2093	10.4877	16.7082	6.77273	104.736	83.6497	105.144
FBgn0265270	16.4307	11.0568	30.6937	131.375	145.297	207.176	19.3937	161.283	-3.11442	8.01282e-24	3.40089e-22	CR43239	2L	17353730	17354668	-	874	lincRNA	-	-	18	15	27	119	135	191	1.02243	0.6958	1.91791	7.93772	8.81478	12.68
FBgn0043575	377.906	549.891	301.253	3733.71	3405.33	3425.45	409.683	3521.5	-3.1008	1.13623e-32	7.22263e-31	PGRP-SC2	2R	8716950	8717695	+	746	protein_coding	-	-	414	746	265	3382	3164	3158	27.5507	40.542	22.0537	264.299	242.04	245.623
FBgn0085356	0	2.94848	0	11.0399	3.22883	14.101	0.982827	9.45658	-3.08593	0.00828905	0.036979	CG34327	X	17222968	17223815	-	848	protein_coding	-	-	0	4	0	10	3	13	0	0.191236	0	0.687487	0.20189	0.889495
FBgn0267145	8.21534	9.58256	7.95763	87.2155	67.8053	59.6579	8.58518	71.5596	-3.04593	2.82529e-14	6.90994e-13	CR45585	3R	5015624	5021474	+	753	lincRNA	-	-	9	13	7	79	63	55	0.59336	0.699928	0.577136	6.11635	4.77458	4.23803
FBgn0267164	1.82563	0	2.27361	11.0399	7.53393	11.9316	1.36641	10.1685	-3.01436	0.00394785	0.0197952	CR45604	X	11089231	11095143	-	5913	lincRNA	-	-	2	0	2	10	7	11	0.0167916	0	0.0209989	0.0985945	0.0675584	0.10794
FBgn0035476	114.102	153.321	95.4915	1026.71	939.588	926.325	120.971	964.209	-2.97262	1.06615e-104	3.97473e-102	CG12766	3L	3938624	3940125	-	1075	protein_coding	-	Aldo_ket_red	125	208	84	930	873	854	5.77262	7.8444	4.85117	50.4353	46.3442	46.0941
FBgn0259968	257.414	850.636	408.113	3464.33	4051.1	4292.12	505.388	3935.85	-2.96041	9.17905e-09	1.34841e-07	Sfp60F	2R	25172245	25172695	-	399	protein_coding	-	-	282	1154	359	3138	3764	3957	35.0871	117.257	55.8595	458.501	538.352	575.425
FBgn0053532	33.7742	14.0053	48.8826	115.919	388.535	240.801	32.2207	248.419	-2.95622	1.32413e-05	0.00012308	lectin-37Da	2L	19418317	19419029	+	651	protein_coding	-	Lectin_C	37	19	43	105	361	222	2.82158	1.18325	4.10074	9.40305	31.6458	19.7865
FBgn0028853	94.9328	125.31	73.8922	733.052	800.749	729.996	98.0452	754.599	-2.91897	4.22125e-87	1.0783e-84	CG15263	2L	15285000	15286047	+	1048	protein_coding	-	-	104	170	65	664	744	673	4.92655	6.57646	3.85059	36.9375	40.5136	37.2606
FBgn0023495	105.887	30.959	47.7458	490.173	315.349	513.058	61.5305	439.527	-2.83793	2.13092e-07	2.64571e-06	Lip3	3R	13370240	13371904	-	1434	protein_coding	-	-	116	42	42	444	293	473	4.01587	1.18742	1.81834	18.0507	11.6602	19.1385
FBgn0266001	1.82563	5.15984	0	24.2879	3.22883	24.9479	2.32849	17.4882	-2.7962	0.00163038	0.00935889	CR44775	2L	6507424	6508404	-	981	lincRNA	-	-	2	7	0	22	3	23	0.101212	0.28929	0	1.30742	0.174519	1.36036
FBgn0051446	17.3435	12.531	14.7784	97.1515	111.933	92.1986	14.8843	100.428	-2.76436	5.4244e-18	1.71615e-16	CG31446	3R	15693086	15694194	+	884	protein_coding	-	-	19	17	13	88	104	85	1.06702	0.779653	0.912991	5.80351	6.71383	5.57908
FBgn0028396	8.21534	8.10832	0	26.4959	48.4324	42.3029	5.44122	39.077	-2.76209	6.48612e-07	7.5438e-06	TotA	3R	20871036	20871700	+	579	protein_coding	-	-	9	11	0	24	45	39	0.771676	0.770227	0	2.41654	4.4353	3.90825
FBgn0028948	5.47689	11.0568	7.95763	48.5757	59.1951	60.7426	8.16377	56.1712	-2.75836	1.1416e-10	2.04065e-09	CG15253	2L	15615357	15616351	-	942	protein_coding	-	Astacin	6	15	7	44	55	56	0.316207	0.645573	0.461341	2.72309	3.33197	3.44932
FBgn0039768	125.056	161.429	159.153	977.035	843.8	1168.21	148.546	996.349	-2.74535	2.93385e-87	7.63576e-85	CG15533	3R	30428820	30431362	+	2203	protein_coding	-	Metallophos	137	219	140	885	784	1077	3.08729	4.03027	3.94538	23.4201	20.3091	28.3659
FBgn0261054	3.65126	8.84544	2.27361	32.0158	31.212	41.2182	4.92344	34.8153	-2.74127	7.14644e-07	8.22168e-06	Sfp24Bc	2L	3670131	3670581	-	386	protein_coding	-	Kunitz_BPTI	4	12	2	29	29	38	0.514451	1.26037	0.321675	4.37997	4.28746	5.71205
FBgn0053290	72.1124	128.259	107.996	694.412	638.231	736.504	102.789	689.716	-2.73818	1.39099e-68	2.13193e-66	CG33290	3L	21542359	21543012	+	654	protein_coding	-	-	79	174	95	629	593	679	5.99681	10.7864	9.01823	56.0704	51.7447	60.2404
FBgn0264831	12.7794	2.21136	1.1368	35.3278	31.212	41.2182	5.37586	35.9193	-2.7287	3.55621e-06	3.63635e-05	CR44039	3R	12268784	12270223	+	1383	lincRNA	-	-	14	3	1	32	29	38	0.502547	0.0879435	0.0448904	1.34893	1.19664	1.59425
FBgn0028533	896.385	1087.25	801.447	6027.81	6353.25	5988.57	928.361	6123.21	-2.7166	5.57648e-197	6.41017e-194	CG7953	2L	13847925	13849223	+	1154	protein_coding	-	-	982	1475	705	5460	5903	5521	42.2451	51.8192	37.9279	275.834	291.915	277.593
FBgn0035926	126.881	341.287	131.869	1315.96	1200.05	1411.18	200.012	1309.06	-2.70745	1.22081e-08	1.76704e-07	CG5804	3L	8788144	8788545	-	337	protein_coding	-	-	139	463	116	1192	1115	1301	20.4765	55.7001	21.3699	206.209	188.814	223.998
FBgn0030777	255.588	393.622	227.361	1988.29	1884.56	1790.82	292.19	1887.89	-2.68762	1.29354e-28	6.9973e-27	CG9672	X	16705971	16706874	-	813	protein_coding	-	Trypsin	280	534	200	1801	1751	1651	17.0977	26.629	15.2727	129.147	122.909	117.829
FBgn0053306	83.0662	123.099	88.6707	585.117	544.595	761.452	98.2786	630.388	-2.66744	9.6987e-58	1.16334e-55	CG33306	2L	13842888	13843742	-	800	protein_coding	-	-	91	167	78	530	506	702	5.64706	8.46313	6.05313	38.623	36.0952	50.9147
FBgn0267041	4.56408	2.21136	3.41041	16.5599	20.4492	26.0326	3.39528	21.0139	-2.65326	8.90947e-05	0.00069987	CR45485	X	16307032	16308687	+	1547	lincRNA	-	-	5	3	3	15	19	24	0.160454	0.0786205	0.120394	0.565277	0.700894	0.900154
FBgn0020508	77.5893	136.367	84.1235	633.693	665.138	596.579	99.36	631.803	-2.64783	2.87378e-58	3.53937e-56	Ag5r2	X	14782962	14784052	-	849	protein_coding	-	SCP	85	185	74	574	618	550	4.9703	8.83423	5.41127	39.4153	41.5403	37.5881
FBgn0085359	391.598	389.199	397.881	2313.97	2488.35	2524.07	392.893	2442.13	-2.6369	6.93746e-220	9.56953e-217	CG34330	X	19068275	19068973	-	699	protein_coding	-	-	429	528	350	2096	2312	2327	30.4685	30.624	31.0861	174.813	188.756	193.159
FBgn0034663	499.31	661.934	486.552	3147.49	3685.17	3429.79	549.265	3420.81	-2.63247	1.78324e-140	1.11809e-137	CG4363	2R	21834230	21835047	-	687	protein_coding	-	-	547	898	428	2851	3424	3162	39.5277	52.9937	38.6778	241.936	284.424	267.055
FBgn0265445	2.73845	4.42272	0	14.3519	13.9916	19.5244	2.38706	15.956	-2.63133	0.000923551	0.00566198	CR44345	2L	17354877	17355523	+	647	lincRNA	-	-	3	6	0	13	13	18	0.230191	0.375969	0	1.17138	1.14664	1.61423
FBgn0265539	3.65126	7.3712	9.09443	34.2238	38.7459	48.811	6.70563	40.5936	-2.61385	1.10899e-07	1.431e-06	CR44389	2R	17188796	17189095	-	300	lincRNA	-	-	4	10	8	31	36	45	0.661927	1.3514	1.65556	6.02422	6.84811	8.70336
FBgn0028920	1820.15	2370.58	1682.47	12371.4	11750.8	11848.1	1957.73	11990.1	-2.61212	1.75731e-162	1.27581e-159	CG8997	2L	13843915	13845325	-	1347	protein_coding	-	-	1994	3216	1480	11206	10918	10923	73.4901	96.7951	68.2134	485.002	462.557	470.512
FBgn0028945	25.5588	39.0674	17.0521	141.311	165.746	206.091	27.2261	171.05	-2.61075	5.96108e-22	2.32938e-20	CG7631	2L	15628678	15629552	+	813	protein_coding	-	Astacin	28	53	15	128	154	190	1.70977	2.64296	1.14545	9.17867	10.8098	13.56
FBgn0036880	5.47689	9.58256	11.368	48.5757	49.5087	61.8273	8.80916	53.3039	-2.60974	1.08511e-09	1.76095e-08	Cpr76Bc	3L	19520945	19527272	+	1838	protein_coding	-	Chitin_bind_4	6	13	10	44	46	57	0.16206	0.286749	0.337777	1.39562	1.42824	1.79939
FBgn0034468	116.84	120.888	93.2179	879.883	502.621	637.798	110.315	673.434	-2.60128	2.15648e-48	1.99641e-46	Obp56a	2R	19697723	19698508	+	547	protein_coding	-	-	128	164	82	797	467	588	11.617	12.1552	9.30683	84.9437	48.7213	62.3715
FBgn0261930	93.1072	80.3461	68.2082	504.525	469.256	493.534	80.5538	489.105	-2.59366	1.18214e-65	1.68108e-63	vnd	X	582121	598151	+	4322	protein_coding	-	Homeobox	102	109	60	457	436	455	1.17162	1.02246	0.86187	6.16442	5.75693	6.10833
FBgn0039475	1127.33	1501.51	992.43	7292.99	7556.53	6953.95	1207.09	7267.82	-2.58866	7.84204e-45	6.80334e-43	CG6277	3R	27022071	27023217	-	1085	protein_coding	-	Lipase	1235	2037	873	6606	7021	6411	56.5078	76.1143	49.9528	354.952	369.282	342.84
FBgn0050360	6515.68	6468.96	6028.47	37864.8	38398.3	37826.4	6337.7	38029.8	-2.58464	0	0	Mal-A6	2R	8465158	8467595	+	2291	protein_coding	-	-	7138	8776	5303	34298	35677	34873	154.676	155.302	143.705	872.779	888.695	883.202
FBgn0044810	28.2973	62.6552	25.0097	245.087	226.018	241.886	38.6541	237.663	-2.57823	6.13281e-25	2.75557e-23	TotX	3R	20904917	20905518	-	602	protein_coding	-	-	31	85	22	222	210	223	2.55644	5.72436	2.26883	21.4989	19.9073	21.4934
FBgn0039485	34.687	59.7067	47.7458	320.158	287.365	232.124	47.3798	279.882	-2.55006	2.6843e-33	1.74657e-31	CG17189	3R	27101406	27102917	+	995	protein_coding	-	-	38	81	42	290	267	214	1.89597	3.3004	2.6206	16.9916	15.3136	12.4792
FBgn0267106	4.56408	1.47424	2.27361	3.31198	15.0679	29.2866	2.77064	15.8888	-2.53557	0.00310643	0.016176	CG45546	3R	29369338	29369777	+	440	protein_coding	-	TIL	5	2	2	3	14	27	0.564142	0.184282	0.282197	0.397493	1.81579	3.56047
FBgn0262170	2.73845	1.47424	4.54721	19.8719	15.0679	13.0163	2.91997	15.9853	-2.5192	0.000906595	0.00558035	CG42878	2R	19587372	19587763	+	340	protein_coding	-	-	3	2	4	18	14	12	0.43804	0.238482	0.730393	3.08641	2.34984	2.04785
FBgn0019928	148.789	204.919	105.723	799.292	892.232	925.24	153.144	872.255	-2.5027	3.85967e-20	1.36164e-18	Ser8	2R	13434207	13435045	+	839	protein_coding	-	Trypsin	163	278	93	724	829	853	9.64488	13.4335	6.88171	50.308	56.3874	58.9906
FBgn0263624	5.47689	5.15984	3.41041	25.3919	19.373	35.7948	4.68238	26.8532	-2.49718	2.39658e-05	0.000212321	CR43633	3R	25794066	25794421	-	356	lincRNA	-	-	6	7	3	23	18	33	0.836705	0.797173	0.523174	3.7665	2.88544	5.37848
FBgn0030981	26.4717	6.63408	12.5048	92.7355	86.102	74.8436	15.2035	84.5604	-2.49427	3.63766e-11	6.81764e-10	CG14191	X	19081665	19082566	+	787	protein_coding	-	-	29	9	11	84	80	69	1.82934	0.463631	0.867747	6.2225	5.80102	5.0871
FBgn0265370	2.73845	2.94848	5.68402	14.3519	23.6781	23.8632	3.79032	20.6311	-2.48995	0.000197855	0.00143643	CR44311	2L	3702614	3702947	+	334	lincRNA	-	-	3	4	5	13	22	22	0.445909	0.485532	0.929392	2.26912	3.75894	3.82184
FBgn0029795	2.73845	8.84544	4.54721	29.8078	26.9069	36.8795	5.37703	31.1981	-2.48981	7.45954e-06	7.24626e-05	CG15773	X	5732740	5734614	+	1786	protein_coding	-	-	3	12	4	27	25	34	0.0833894	0.272398	0.139044	0.881339	0.798818	1.10457
FBgn0035620	59.333	137.104	63.661	465.886	486.476	500.042	86.6994	484.135	-2.47327	1.33884e-10	2.37989e-09	CG5150	3L	5595542	5597422	+	1881	protein_coding	-	-	65	186	56	422	452	461	1.71552	4.00893	1.84831	13.0793	13.7132	14.2203
FBgn0264471	3.65126	0.73712	2.27361	9.93595	13.9916	11.9316	2.22066	11.953	-2.47227	0.00458068	0.0225342	CR43879	3L	4703378	4703979	+	476	lincRNA	-	-	4	1	2	9	13	11	0.417181	0.0851722	0.260854	1.10229	1.55857	1.34085
FBgn0259970	0.912816	7.3712	4.54721	16.5599	21.5255	34.7101	4.27708	24.2652	-2.46883	0.000163865	0.00121069	Sfp70A4	3L	13296530	13296860	-	331	protein_coding	-	-	1	10	4	15	20	32	0.149983	1.22483	0.750252	2.64194	3.44819	5.60942
FBgn0028544	3.65126	4.42272	5.68402	37.5358	22.6018	15.1857	4.586	25.1077	-2.46796	7.25211e-05	0.00057891	CG16884	2L	13944756	13947476	-	1413	protein_coding	-	-	4	6	5	34	21	14	0.140536	0.172153	0.219686	1.4028	0.848138	0.574886
FBgn0029924	10.041	14.7424	23.8729	85.0076	97.941	79.1824	16.2187	87.377	-2.46223	3.16222e-13	7.09262e-12	CG4586	X	6969918	6972265	+	2240	protein_coding	-	-	11	20	21	77	91	73	0.24379	0.361982	0.582032	2.00403	2.31837	1.89091
FBgn0034664	649.012	800.512	671.851	3553.76	4085.54	4061.08	707.125	3900.13	-2.45984	8.81387e-163	6.75437e-160	CG4377	2R	21835448	21836357	-	788	protein_coding	-	-	711	1086	591	3219	3796	3744	44.7934	55.8738	46.5625	238.153	274.909	275.68
FBgn0085485	4.56408	7.3712	11.368	36.4318	38.7459	49.8957	7.76777	41.6911	-2.45524	2.26163e-07	2.79793e-06	CG34456	3L	9362108	9362734	+	627	protein_coding	-	-	5	10	10	33	36	46	0.395889	0.646602	0.990165	3.06836	3.27661	4.25683
FBgn0083936	1094.47	2405.22	1389.17	9178.61	7636.17	9744.85	1629.62	8853.21	-2.44131	2.49004e-11	4.7507e-10	Acp54A1	2R	17133445	17133750	+	306	protein_coding	-	-	1199	3263	1222	8314	7095	8984	194.522	432.315	247.928	1583.98	1323.18	1703.51
FBgn0051269	6.38971	1.47424	4.54721	17.6639	24.7543	21.6938	4.13705	21.3707	-2.41395	0.000243841	0.00173111	CG31269	3R	17127126	17128201	+	937	protein_coding	-	Trypsin	7	2	4	16	23	20	0.370877	0.0865357	0.26503	0.995499	1.4008	1.23847
FBgn0054026	268.368	384.039	244.413	1551.11	1579.97	1615.1	298.94	1582.06	-2.39213	2.93273e-82	6.2237e-80	CG34026	X	9533818	9534625	+	747	protein_coding	-	-	294	521	215	1405	1468	1489	19.5388	28.2763	17.8687	109.652	112.149	115.656
FBgn0029639	30.1229	25.0621	21.5993	162.287	94.7122	147.518	25.5948	134.839	-2.38977	4.6713e-17	1.41307e-15	CG14419	X	2885186	2885914	-	729	protein_coding	-	-	33	34	19	147	88	136	2.24728	1.89085	1.61809	11.7557	6.88881	10.8245
FBgn0032266	51.1177	38.3302	34.1041	206.447	226.018	216.938	41.184	216.468	-2.38832	1.95551e-29	1.10099e-27	CG18302	2L	10534322	10536587	+	2144	protein_coding	-	-	56	52	30	187	210	200	1.29668	0.983294	0.868704	5.08484	5.58964	5.41254
FBgn0004426	5.47689	25.7992	2.27361	68.4476	55.9663	54.2345	11.1832	59.5495	-2.38419	0.0072822	0.0334434	LysC	3L	1210485	1210971	+	487	protein_coding	-	-	6	35	2	62	52	50	0.611636	2.91369	0.254962	7.42204	6.09346	5.95713
FBgn0265789	1.82563	2.94848	2.27361	18.7679	5.38138	13.0163	2.34924	12.3885	-2.38066	0.00582047	0.0276282	CR44578	2L	5888149	5888484	+	336	lincRNA	-	-	2	4	2	17	5	12	0.295503	0.482642	0.369544	2.94965	0.84922	2.07223
FBgn0032265	60.2458	113.516	55.7034	416.206	411.137	386.15	76.4886	404.498	-2.37543	6.75884e-33	4.35661e-31	CG18301	2L	10531821	10533647	+	1371	protein_coding	-	Abhydrolase_1	66	154	49	377	382	356	2.38989	4.55395	2.21888	16.0311	15.9007	15.0664
FBgn0051205	513.002	640.557	499.057	3010.59	3009.27	2554.44	550.872	2858.1	-2.3698	4.42467e-122	2.03447e-119	CG31205	3R	20731631	20732707	+	1020	protein_coding	-	Trypsin	562	869	439	2727	2796	2355	27.3531	34.5402	26.7202	155.864	156.432	133.964
FBgn0002570	13137.2	13854.2	12714	65792.5	69155	69877.9	13235.1	68275.1	-2.36674	0	0	Mal-A1	2R	8449664	8451904	-	1826	protein_coding	-	-	14392	18795	11184	59595	64254	64422	391.283	417.298	380.252	1902.7	2008.12	2047.05
FBgn0035434	155.179	192.388	183.025	952.747	878.241	895.954	176.864	908.98	-2.35923	4.07483e-92	1.14711e-89	Drsl5	3L	3316781	3317144	+	364	protein_coding	-	-	170	261	161	863	816	826	23.1856	29.0699	27.46	138.22	127.932	131.666
FBgn0025454	4378.78	4536.24	4789.35	24711.8	21946.3	23415.2	4568.12	23357.8	-2.35462	3.67096e-286	7.2339e-283	Cyp6g1	2R	12185667	12188431	+	2074	protein_coding	-	p450	4797	6154	4213	22384	20391	21587	114.824	120.297	126.112	629.201	561.073	603.92
FBgn0039313	105.887	315.487	121.638	942.811	861.02	974.051	181.004	925.961	-2.35196	2.57614e-06	2.7023e-05	CG11892	3R	25281548	25283237	+	1607	protein_coding	-	-	116	428	107	854	800	898	3.58355	10.7977	4.13374	30.9815	28.4095	32.4232
FBgn0031558	51.1177	100.985	59.1138	296.974	370.239	420.86	70.4056	362.691	-2.34428	9.78009e-29	5.35343e-27	CG16704	2L	3692123	3692587	-	350	protein_coding	-	-	56	137	52	269	344	388	7.94312	15.8693	9.22381	44.8069	56.0893	64.322
FBgn0015586	45.6408	41.2787	60.2506	195.407	241.086	299.374	49.0567	245.289	-2.34063	9.64985e-27	4.80542e-25	Acp76A	3L	19050757	19052026	-	1201	protein_coding	-	Serpin	50	56	53	177	224	276	2.0668	1.89038	2.73973	8.59193	10.6437	13.334
FBgn0004589	0.912816	2.94848	2.27361	7.72796	13.9916	9.76221	2.04497	10.4939	-2.34048	0.00991125	0.042898	Eig71Eb	3L	15649936	15650541	+	472	protein_coding	-	-	1	4	2	7	13	9	0.105179	0.343576	0.263065	0.864602	1.57178	1.10636
FBgn0002565	25.5588	36.856	29.5569	179.951	192.653	87.8599	30.6572	153.488	-2.3142	6.11353e-15	1.57626e-13	Lsp2	3L	12129393	12131869	+	2477	protein_coding	-	-	28	50	26	163	179	81	0.561181	0.818368	0.651662	3.83638	4.12398	1.89738
FBgn0002855	169.784	167.326	198.941	758.444	866.402	988.152	178.684	870.999	-2.29238	9.58169e-72	1.57345e-69	Acp26Aa	2L	5892883	5893896	-	958	protein_coding	-	-	186	227	175	687	805	911	9.6387	9.6065	11.3409	41.8073	47.9534	55.1758
FBgn0040060	2816.04	3238.9	2237.23	14254.8	13593.4	12665.9	2764.06	13504.7	-2.28684	3.71616e-118	1.6019e-115	yip7	3L	6035216	6036175	+	904	protein_coding	-	Trypsin	3085	4394	1968	12912	12630	11677	169.417	197.059	135.155	832.694	797.305	749.478
FBgn0267327	214.512	196.074	198.941	852.284	995.555	1102.04	203.175	983.294	-2.2755	1.09896e-79	2.16558e-77	Acp33A	2L	11591339	11591678	-	340	protein_coding	-	-	235	266	175	772	925	1016	34.3131	31.7181	31.9547	132.373	155.257	173.385
FBgn0265062	1.82563	2.94848	5.68402	13.2479	16.1441	19.5244	3.48604	16.3055	-2.27283	0.00165997	0.00948926	CR44173	3R	19278775	19279728	-	882	lincRNA	-	-	2	4	5	12	15	18	0.112573	0.183864	0.351947	0.793182	0.970537	1.18413
FBgn0011669	54.7689	74.4491	57.977	238.463	272.298	396.996	62.3983	302.586	-2.26764	1.16856e-26	5.75683e-25	Mst57Db	3R	25830720	25830914	-	195	protein_coding	-	-	60	101	51	216	253	366	15.2752	20.9987	16.2372	64.5773	74.0415	108.904
FBgn0039591	3.65126	4.42272	7.95763	17.6639	32.2883	24.9479	5.34387	24.9667	-2.26313	0.000135465	0.00101838	CG9988	3R	28636411	28638799	+	2274	protein_coding	-	DUF229	4	6	7	16	30	23	0.0873254	0.106971	0.19111	0.410195	0.75287	0.586858
FBgn0037678	240.983	286.003	188.709	1164.71	1135.47	1166.04	238.565	1155.41	-2.26228	1.73724e-79	3.37513e-77	CG16749	3R	9330885	9331885	-	873	protein_coding	-	Trypsin	264	388	166	1055	1055	1075	15.0128	18.0186	11.8051	70.4529	68.9648	71.448
FBgn0259975	1636.68	2978.7	1406.23	9442.46	9506.74	9945.52	2007.2	9631.57	-2.26218	1.44733e-10	2.55955e-09	Sfp87B	3R	12273126	12273521	+	396	protein_coding	-	-	1793	4041	1237	8553	8833	9169	224.779	413.712	193.932	1259.17	1272.92	1343.45
FBgn0001089	56.5946	103.197	98.9019	405.166	393.917	437.13	86.2311	412.071	-2.25507	1.14273e-36	8.25275e-35	Gal	2L	6003574	6006827	-	2345	protein_coding	-	-	62	140	87	367	366	403	1.31256	2.42042	2.30331	9.12397	8.90692	9.97145
FBgn0027600	7.30253	8.10832	10.2312	45.2638	37.6696	37.9641	8.54736	40.2992	-2.25162	7.26151e-07	8.3471e-06	obst-B	2L	10032690	10038954	+	1149	protein_coding	-	CBM_14	8	11	9	41	35	35	0.345654	0.38813	0.486293	2.08029	1.73835	1.76744
FBgn0036023	15.5179	12.531	4.54721	44.1598	76.4155	36.8795	10.8654	52.4849	-2.2372	6.48045e-07	7.54357e-06	CG18179	3L	9639271	9640140	+	870	protein_coding	-	Trypsin	17	17	4	40	71	34	0.970065	0.792199	0.285441	2.68041	4.65724	2.26754
FBgn0051148	233.681	232.93	221.677	1049.9	1025.69	1169.3	229.429	1081.63	-2.23495	7.10898e-99	2.22867e-96	CG31148	3R	23700621	23702605	+	1777	protein_coding	-	Glyco_hydro_30	256	316	195	951	953	1078	7.15194	7.20949	6.81275	31.1999	30.6052	35.1988
FBgn0028534	1518.01	1840.59	1180	7461.9	6315.58	7531	1512.87	7102.83	-2.23013	1.91924e-29	1.085e-27	CG7916	2L	13846752	13847799	+	923	protein_coding	-	-	1663	2497	1038	6759	5868	6943	89.4461	109.679	69.8186	426.915	362.809	436.457
FBgn0037204	9.12816	2.94848	9.09443	33.1198	24.7543	37.9641	7.05702	31.9461	-2.2265	2.91162e-05	0.000252568	CG11131	3L	22898744	22900262	+	1379	protein_coding	-	-	10	4	8	30	23	35	0.360004	0.117598	0.360165	1.26829	0.951816	1.47265
FBgn0259951	88.5431	169.538	79.5763	522.189	523.07	532.583	112.552	525.947	-2.2166	5.12415e-11	9.48758e-10	Sfp24Ba	2L	3667977	3668551	-	522	protein_coding	-	Kunitz_BPTI	97	230	70	473	486	491	9.22513	17.8633	8.32536	52.8264	53.1319	54.5767
FBgn0250836	211.773	320.647	200.077	1002.43	1328.12	1078.18	244.166	1136.24	-2.21424	3.40766e-19	1.15776e-17	CG8628	3L	7130874	7131505	+	436	protein_coding	-	-	232	435	176	908	1234	994	26.4163	40.449	25.0612	121.411	161.517	132.281
FBgn0039840	202.645	169.538	168.247	851.18	765.232	863.413	180.143	826.608	-2.1975	9.71481e-76	1.76324e-73	CG11340	3R	31302489	31305384	-	2244	protein_coding	-	Neur_chan_LBD	222	230	148	771	711	796	4.91135	4.15537	4.09462	20.0305	18.0816	20.5819
FBgn0031418	1881.31	2210.62	1775.69	8838.58	8969.68	9108.14	1955.87	8972.13	-2.19528	3.59687e-175	3.30768e-172	CG3609	2L	2372455	2374627	-	1364	protein_coding	-	GFO_IDH_MocA	2061	2999	1562	8006	8334	8397	75.0127	89.1388	71.0955	342.186	348.681	357.195
FBgn0035356	357.824	558	328.536	1650.47	2013.71	1989.32	414.787	1884.5	-2.18133	1.52894e-16	4.47773e-15	CG16986	3L	2600331	2601536	+	769	protein_coding	-	4HBT	392	757	289	1495	1871	1834	25.3064	39.9093	23.3317	113.338	138.847	138.379
FBgn0039666	8.21534	4.42272	4.54721	34.2238	20.4492	22.7785	5.72843	25.8172	-2.17239	0.000153811	0.00114243	Diedel	3R	29493852	29494267	+	416	protein_coding	-	-	9	6	4	31	19	21	1.07404	0.58474	0.596955	4.34439	2.60645	2.92902
FBgn0034247	7628.4	6848.58	7325.56	31370	33069.6	33483.3	7267.52	32641	-2.16744	3.32377e-271	5.73101e-268	CG6484	2R	17582007	17584012	-	1590	protein_coding	-	Sugar_tr	8357	9291	6444	28415	30726	30869	260.93	236.903	251.613	1041.86	1102.8	1126.47
FBgn0035663	2.73845	8.10832	5.68402	34.2238	31.212	9.76221	5.51026	25.066	-2.16435	0.000632273	0.00406221	CG6462	3L	6037111	6038188	+	1078	protein_coding	-	Trypsin	3	11	5	31	29	9	0.138157	0.413693	0.287956	1.6765	1.53521	0.484417
FBgn0000079	23463.9	25100.4	21150.2	117508	99120.6	95778.1	23238.2	104136	-2.16375	3.32455e-153	2.29294e-150	Amy-p	2R	17118636	17120303	-	1668	protein_coding	-	-	25705	34052	18605	106439	92096	88300	765.055	827.659	692.483	3720.19	3150.9	3071.57
FBgn0035076	237.332	270.523	312.621	1198.94	1299.06	1158.45	273.492	1218.82	-2.16171	4.85062e-88	1.28672e-85	Ance-5	2R	24888628	24891023	-	2116	protein_coding	-	Peptidase_M2	260	367	275	1086	1207	1068	6.09998	7.03162	8.06849	29.9209	32.5522	29.2854
FBgn0267562	3.65126	3.6856	2.27361	2.20799	21.5255	19.5244	3.20349	14.4193	-2.15085	0.0102763	0.0442503	CR45902	3R	6834343	6834967	-	625	lincRNA	-	-	4	5	2	2	20	18	0.317725	0.324336	0.198667	0.186557	1.82616	1.67105
FBgn0263235	248.286	297.059	259.191	1255.24	1236.64	1059.74	268.179	1183.87	-2.13731	3.06905e-84	7.17533e-82	Phae2	2L	12111110	12112256	+	1147	protein_coding	-	Trypsin	272	403	228	1137	1149	977	11.7727	14.2445	12.3409	57.7906	57.1671	49.4228
FBgn0042201	53.8561	96.5627	52.293	310.222	307.815	288.527	67.5706	302.188	-2.13528	7.56444e-26	3.57342e-24	Nplp3	3L	16318024	16318690	+	538	protein_coding	-	-	59	131	46	281	286	266	5.44428	9.87174	5.30824	30.4498	30.337	28.6877
FBgn0263234	372.429	311.802	314.895	1599.69	1440.06	1345.02	333.042	1461.59	-2.13376	1.33286e-93	3.91179e-91	Phae1	2L	12109417	12110664	+	1248	protein_coding	-	Trypsin	408	423	277	1449	1338	1240	16.2299	13.7414	13.7797	67.6884	61.183	57.6505
FBgn0004414	110.451	95.8256	60.2506	268.271	334.722	568.377	88.8423	390.457	-2.1322	1.72761e-07	2.16053e-06	msopa	3L	22082720	22083367	+	648	protein_coding	-	-	121	130	53	243	311	524	9.27004	8.13342	5.07781	21.8621	27.3889	46.9194
FBgn0030776	328.614	302.956	268.286	1356.81	1321.67	1278.85	299.952	1319.11	-2.1321	3.56621e-103	1.26134e-100	CG4653	X	16704081	16705278	+	895	protein_coding	-	Trypsin	360	411	236	1229	1228	1179	19.9687	18.6176	16.3706	80.0552	78.3005	76.434
FBgn0043535	133.271	139.316	148.921	604.989	624.24	610.68	140.503	613.303	-2.12948	4.41862e-65	6.15661e-63	Obp57a	2R	20505150	20505758	+	558	protein_coding	-	-	146	189	131	548	580	563	12.9894	13.732	14.5751	57.2541	59.3175	58.5423
FBgn0038404	125.056	121.625	97.7651	511.149	494.01	494.619	114.815	499.926	-2.11222	1.1114e-51	1.16142e-49	CG8925	3R	16171991	16180475	+	2398	protein_coding	-	MFS_1	137	165	86	463	459	456	2.83624	2.78958	2.22651	11.2562	10.9233	11.0335
FBgn0085256	17.3435	13.2682	3.41041	70.6556	52.7375	27.1172	11.3407	50.1701	-2.10765	1.00556e-05	9.50697e-05	CG34227	2R	11248126	11248610	+	485	protein_coding	-	-	19	18	3	64	49	25	1.94484	1.50465	0.384021	7.69305	5.76559	2.99085
FBgn0262623	128.707	143.001	159.153	487.965	563.968	797.247	143.62	616.394	-2.10528	1.32487e-36	9.46902e-35	CG43147	3L	13299841	13300152	-	260	protein_coding	-	-	141	194	140	442	524	735	26.9226	30.2505	33.4295	99.1081	115.013	164.025
FBgn0032507	146.051	241.775	86.3971	756.236	624.24	645.39	158.074	675.289	-2.0903	5.95645e-07	6.9689e-06	CG9377	2L	13359901	13361565	-	1191	protein_coding	-	Trypsin	160	328	76	685	580	595	6.66929	11.1652	3.96166	33.5304	27.7911	28.9869
FBgn0037870	30.1229	36.1189	17.0521	90.5275	119.467	151.857	27.7646	120.617	-2.08899	1.84693e-12	3.87181e-11	CG18577	3R	11196092	11197285	+	810	protein_coding	-	-	33	49	15	82	111	140	2.02255	2.45254	1.14969	5.90186	7.82037	10.0286
FBgn0051041	4.56408	4.42272	2.27361	6.62397	25.8306	16.2703	3.75347	16.2416	-2.08567	0.00490466	0.0239317	CG31041	3R	29590070	29590906	-	700	protein_coding	-	-	5	6	2	6	24	15	0.354604	0.347503	0.177381	0.499705	1.9566	1.24334
FBgn0039092	0	11.7939	3.41041	22.0799	18.2967	27.1172	5.06811	22.4979	-2.08151	0.00285981	0.0151201	CG16723	3R	23593625	23596273	-	2088	protein_coding	-	-	0	16	3	20	17	25	0	0.310666	0.0892002	0.558419	0.464631	0.694713
FBgn0051104	520.305	630.975	482.005	2398.98	2079.36	2410.18	544.428	2296.17	-2.07045	3.99059e-93	1.1468e-90	CG31104	3R	25285473	25286974	+	1382	protein_coding	-	-	570	856	424	2173	1932	2222	20.4757	25.1114	19.0473	91.6668	79.779	93.2893
FBgn0000078	9301.59	9249.38	8347.55	40161.1	37011	35303.4	8966.17	37491.8	-2.06367	2.25284e-202	2.82506e-199	Amy-d	2R	17124764	17126369	+	1606	protein_coding	-	-	10190	12548	7343	36378	34388	32547	314.992	316.762	283.859	1320.55	1221.94	1175.88
FBgn0039474	1821.07	1534.68	1722.26	7373.58	6999.02	6687.11	1692.67	7019.9	-2.0535	2.75233e-163	2.23328e-160	CG6283	3R	27020238	27021378	-	1083	protein_coding	-	Lipase	1995	2082	1515	6679	6503	6165	91.4504	77.9394	86.8479	359.537	342.669	330.294
FBgn0004181	5254.17	9780.84	5678.33	27567.8	28291	30106.6	6904.45	28655.2	-2.05308	1.41576e-11	2.75445e-10	Peb	2R	25175126	25176715	-	1529	protein_coding	-	-	5756	13269	4995	24971	26286	27756	186.889	351.832	202.816	952.114	981.084	1053.28
FBgn0051832	65.7227	67.0779	87.5339	341.134	257.23	306.967	73.4448	301.777	-2.05132	4.03493e-29	2.25335e-27	CG31832	2L	15030928	15031750	-	762	protein_coding	-	Fibrinogen_C	72	91	77	309	239	283	4.69082	4.84163	6.27352	23.6409	17.8991	21.549
FBgn0036321	565.946	431.215	467.226	2008.17	1995.41	2053.32	488.129	2018.97	-2.04996	3.35805e-100	1.10288e-97	CG14120	3L	12885039	12889244	+	4206	protein_coding	-	-	620	585	411	1819	1854	1893	7.31802	5.63886	6.06663	25.213	25.1553	26.1142
FBgn0261989	1099.94	975.21	1223.2	4049.45	5597.71	3859.33	1099.45	4502.16	-2.03453	1.39433e-24	6.10585e-23	CG42807	2R	13570595	13572759	-	2101	protein_coding	-	-	1205	1323	1076	3668	5201	3558	28.4729	25.5293	31.7952	101.78	141.27	98.2598
FBgn0263505	3.65126	3.6856	1.1368	11.0399	11.839	13.0163	2.82456	11.9651	-2.03303	0.011508	0.0487237	CR43494	X	2750919	2751416	-	498	lincRNA	-	-	4	5	1	10	11	12	0.398751	0.407048	0.124665	1.17066	1.26053	1.39813
FBgn0032122	59.333	79.609	80.7131	220.799	311.044	359.032	73.2183	296.958	-2.02121	1.95932e-23	8.06772e-22	CG31883	2L	9528515	9529648	+	1134	protein_coding	-	-	65	108	71	200	289	331	2.84558	3.86114	3.88705	10.282	14.5437	16.936
FBgn0034318	79.415	99.5112	113.68	273.791	518.765	390.488	97.5355	394.348	-2.02047	4.11134e-23	1.67291e-21	CG14500	2R	18188978	18189654	+	677	protein_coding	-	Lectin_C	87	135	100	248	482	360	6.37972	8.08444	9.17036	21.3562	40.6301	30.8539
FBgn0036422	646.274	798.301	578.633	2782.07	2584.14	2869	674.403	2745.07	-2.01928	7.4801e-90	2.06361e-87	CG3868	3L	14400769	14402725	-	1181	protein_coding	-	-	708	1083	509	2520	2401	2645	29.7615	37.1778	26.7574	124.397	116.02	129.949
FBgn0003034	21.9076	28.7477	39.7881	81.6956	127	147.518	30.1478	118.738	-1.99447	1.50665e-11	2.91893e-10	SP	3L	13301635	13301922	+	223	protein_coding	-	-	24	39	35	74	118	136	5.3429	7.0903	9.74403	19.3458	30.1972	35.3859
FBgn0011770	485.618	694.367	428.575	2093.17	2202.06	2116.23	536.187	2137.15	-1.99237	3.4938e-20	1.23573e-18	Gip	X	10328877	10329872	-	996	protein_coding	-	-	532	942	377	1896	2046	1951	26.5169	38.3439	23.4994	110.979	117.229	113.656
FBgn0052483	33.7742	42.753	29.5569	155.663	134.534	136.671	35.3613	142.29	-1.98928	2.49572e-16	7.15718e-15	CG32483	3L	688523	690081	-	1382	protein_coding	-	Peptidase_S10	37	58	26	141	125	126	1.32912	1.70147	1.16799	5.94801	5.16168	5.29003
FBgn0002571	597.894	653.825	491.099	2219.03	2168.69	2550.11	580.94	2312.61	-1.98732	1.07666e-84	2.60552e-82	Mal-A3	2R	8455909	8457892	-	1795	protein_coding	-	-	655	887	432	2010	2015	2351	18.1154	20.0338	14.9415	65.2818	64.0619	75.9948
FBgn0040256	156.091	211.553	217.13	781.628	738.325	791.824	194.925	770.592	-1.9844	9.73356e-56	1.10963e-53	Ugt86Dd	3R	11126597	11128328	-	1671	protein_coding	-	UDPGT	171	287	191	708	686	730	5.08032	6.96322	7.0963	24.7012	23.4281	25.3479
FBgn0038083	37.4254	69.2893	17.0521	151.247	176.509	165.958	41.2556	164.571	-1.98211	0.000157611	0.00116698	CG5999	3R	12741958	12743680	-	1667	protein_coding	-	UDPGT	41	94	15	137	164	153	1.22101	2.28611	0.558639	4.79121	5.61433	5.32539
FBgn0032253	200.819	267.575	203.488	725.324	885.775	1043.47	223.961	884.857	-1.975	1.40844e-43	1.1919e-41	CG5322	2L	10452677	10457241	-	3248	protein_coding	-	-	220	363	179	657	823	962	3.36262	4.53101	3.42147	11.7926	14.4602	17.1852
FBgn0036066	61.1587	95.8256	82.9867	316.846	332.569	298.29	79.9903	315.902	-1.97478	6.92621e-29	3.83695e-27	CG14160	3L	10086747	10089400	-	2112	protein_coding	-	Sugar_tr	67	130	73	287	309	275	1.5749	2.49548	2.14587	7.92225	8.34937	7.555
FBgn0262099	8.21534	7.3712	10.2312	25.3919	33.3645	41.2182	8.60592	33.3249	-1.97176	4.76186e-05	0.000396171	CG42852	3L	16755489	16755720	+	165	protein_coding	-	-	9	10	9	23	31	38	2.70788	2.45709	3.38637	8.12651	10.7218	13.3627
FBgn0031791	97.6713	89.9286	105.723	402.958	362.705	370.964	97.7742	378.876	-1.96196	6.35619e-38	4.73931e-36	AANATL2	2L	6255859	6256822	+	964	protein_coding	-	Acetyltransf_1	107	122	93	365	337	342	5.51033	5.13083	5.98937	22.0738	19.95	20.5847
FBgn0030597	9.12816	19.9022	19.3257	75.0716	48.4324	65.0814	16.1187	62.8618	-1.96159	1.66692e-07	2.08652e-06	Eo	X	14916756	14918800	-	2045	protein_coding	-	-	10	27	17	68	45	60	0.24276	0.535273	0.516096	1.93855	1.25577	1.70237
FBgn0264725	16.4307	19.9022	18.1889	56.3037	80.7206	75.9283	18.1739	70.9842	-1.96128	5.49421e-09	8.29181e-08	CG43993	3L	12032557	12032999	+	390	protein_coding	-	-	18	27	16	51	75	70	2.29128	2.80675	2.54701	7.6237	10.9745	10.4143
FBgn0030005	10.041	8.84544	9.09443	34.2238	39.8222	34.7101	9.32695	36.252	-1.96027	1.60994e-05	0.000147657	CG2120	X	8135824	8137046	+	1155	protein_coding	-	-	11	12	8	31	37	32	0.472805	0.421215	0.430015	1.56473	1.82814	1.60755
FBgn0038257	2031.93	2917.52	2045.11	9378.43	8873.89	8912.9	2331.52	9055.07	-1.95684	8.48894e-27	4.25805e-25	smp-30	3R	14745901	14751246	-	1666	protein_coding	-	-	2226	3958	1799	8495	8245	8217	66.3317	96.3176	67.0396	297.268	282.426	286.177
FBgn0053533	566.859	536.623	442.217	1757.56	2295.7	1878.68	515.233	1977.31	-1.93662	4.09573e-68	6.14092e-66	lectin-37Db	2L	19419075	19419767	+	562	protein_coding	-	Lectin_C	621	728	389	1592	2133	1732	54.8563	52.517	42.9723	165.146	216.593	178.816
FBgn0266766	42.9023	67.0779	43.1985	184.367	172.204	237.547	51.0596	198.039	-1.93605	1.58389e-17	4.88774e-16	CR45231	2R	19784294	19789736	+	5443	lincRNA	-	-	47	91	38	167	160	219	0.428677	0.67781	0.433432	1.7887	1.67753	2.33454
FBgn0033047	166.132	187.228	194.393	791.564	635.002	656.237	182.585	694.268	-1.92834	1.21961e-50	1.22797e-48	CG7882	2R	5957621	5960183	+	2266	protein_coding	-	Sugar_tr	182	254	171	717	590	605	3.98733	4.54442	4.68502	18.4467	14.8587	15.4914
FBgn0265883	2.73845	14.7424	1.1368	25.3919	33.3645	16.2703	6.20588	25.0089	-1.92685	0.00356706	0.0182237	CR44672	3L	18475298	18475679	+	382	lincRNA	-	-	3	20	1	23	31	15	0.389878	2.12262	0.162522	3.51014	4.63114	2.27837
FBgn0029091	565.033	494.607	467.226	2139.54	1907.16	1744.18	508.956	1930.29	-1.92163	2.39116e-83	5.40715e-81	CS-2	3L	21962401	21969964	+	4509	protein_coding	-	-	619	671	411	1938	1772	1608	6.81524	6.03319	5.65896	25.0573	22.4271	20.692
FBgn0053530	8.21534	17.6909	11.368	47.4718	47.3561	48.811	12.4248	47.8796	-1.92033	2.56053e-06	2.6897e-05	Acp53C14c	2R	16750776	16751495	-	564	protein_coding	-	-	9	24	10	43	44	45	0.792199	1.72519	1.10077	4.44478	4.45208	4.62945
FBgn0035619	126.881	216.713	94.3547	531.021	498.315	626.951	145.983	552.096	-1.91341	8.89438e-08	1.16183e-06	CG10592	3L	5592741	5595272	-	1749	protein_coding	-	-	139	294	83	481	463	578	3.94545	6.81494	2.94621	16.033	15.1071	19.1749
FBgn0037386	625.279	624.341	585.454	2392.36	2067.52	2460.08	611.691	2306.65	-1.9132	3.48817e-104	1.26621e-101	CG1208	3R	5831639	5838782	+	2499	protein_coding	-	Sugar_tr	685	847	515	2167	1921	2268	13.608	13.7411	12.7943	50.5537	43.8683	52.659
FBgn0039769	320.398	257.992	363.777	1057.63	1148.39	1310.31	314.056	1172.11	-1.90884	4.61723e-55	5.17805e-53	CG15534	3R	30432064	30435139	+	2164	protein_coding	-	Metallophos	351	350	320	958	1067	1208	8.05232	6.55716	9.18054	25.8089	28.1382	32.3896
FBgn0032069	1623.9	1578.17	1432.37	4695.29	4871.22	7809.77	1544.82	5792.09	-1.90652	1.11528e-13	2.59429e-12	CG9468	2L	8777661	8781252	-	3160	protein_coding	-	-	1779	2141	1260	4253	4526	7200	27.9486	27.4685	24.7548	78.4637	81.7366	132.203
FBgn0038201	32.8614	53.0726	13.6416	132.479	156.06	93.2833	33.1919	127.274	-1.90106	6.10464e-09	9.13313e-08	PK1-R	3R	14099832	14103122	-	2512	protein_coding	-	7tm_1	36	72	12	120	145	86	0.711466	1.16203	0.296577	2.78498	3.29411	1.98644
FBgn0051779	362.388	518.195	279.654	1288.36	1538	1505.55	386.746	1443.97	-1.89777	2.12072e-12	4.41891e-11	Acp24A4	2L	3693184	3693905	-	653	protein_coding	-	-	397	703	246	1167	1429	1388	30.182	43.6462	23.3882	104.188	124.884	123.331
FBgn0024289	3114.53	4194.21	3054.59	13447.8	12550.4	12343.8	3454.44	12780.7	-1.88614	4.81977e-84	1.10806e-81	Sodh-1	3R	7052335	7054541	+	1387	protein_coding	-	ADH_N	3412	5690	2687	12181	11661	11380	122.125	166.319	120.273	511.996	479.787	476.06
FBgn0029932	1139.19	1130.74	1084.51	4153.23	4184.56	4069.76	1118.15	4135.85	-1.88602	2.87692e-176	2.83459e-173	CG4607	X	7069413	7072689	+	2603	protein_coding	-	Sugar_tr	1248	1534	954	3762	3888	3752	23.8019	23.8922	22.7536	84.2568	85.2396	83.6343
FBgn0039154	234.594	319.173	173.931	864.427	900.842	946.934	242.566	904.068	-1.88467	1.17745e-36	8.45925e-35	Npc2f	3R	24137895	24140936	+	712	protein_coding	-	-	257	433	153	783	837	873	17.9194	24.6554	13.3409	64.1124	67.0864	71.1427
FBgn0039015	13.6922	17.6909	22.7361	62.9277	68.8816	65.0814	18.0397	65.6302	-1.87824	3.61428e-08	4.94596e-07	Takl2	3R	22732356	22733851	-	928	protein_coding	-	Pkinase	15	24	20	57	64	60	0.802443	1.0485	1.338	3.58086	3.93569	3.75145
FBgn0033826	42.9023	50.1242	43.1985	192.095	158.212	147.518	45.4083	165.942	-1.86193	6.99933e-17	2.0898e-15	CG4734	2R	13297202	13298467	-	1011	protein_coding	-	-	47	68	38	174	147	136	2.3079	2.72686	2.3335	10.0336	8.29766	7.80519
FBgn0035189	872.652	1298.07	819.635	4122.31	3618.44	3118.48	996.785	3619.74	-1.85951	4.85606e-14	1.1589e-12	CG9119	3L	1203316	1204795	-	1212	protein_coding	-	-	956	1761	721	3734	3362	2875	39.1585	58.9063	36.9324	179.611	158.301	137.636
FBgn0030595	9.12816	18.428	6.82082	26.4959	55.9663	45.557	11.459	42.673	-1.85386	6.79583e-05	0.00054628	CG14406	X	14909873	14910845	-	667	protein_coding	-	-	10	25	6	24	52	42	0.744295	1.51956	0.558471	2.09771	4.44905	3.65359
FBgn0032068	1496.11	1277.43	1432.37	4171.99	3983.29	6934.42	1401.97	5029.9	-1.8432	5.41359e-11	9.99666e-10	CG9466	2L	8772946	8776263	-	3074	protein_coding	-	-	1639	1733	1260	3779	3701	6393	26.4695	22.856	25.4473	71.6693	68.7076	120.669
FBgn0085291	5.47689	3.6856	9.09443	18.7679	25.8306	18.4397	6.08564	21.0127	-1.83527	0.00216383	0.011835	CR34262	3L	21959254	21960503	+	1130	pseudogene	-	MFS_1	6	5	8	17	24	17	0.263599	0.179389	0.439528	0.877063	1.21205	0.872904
FBgn0031432	469.187	419.421	383.103	1566.57	1521.85	1456.74	423.904	1515.05	-1.83463	1.274e-84	3.02992e-82	Cyp309a1	2L	2562483	2564830	-	1997	protein_coding	-	p450	514	569	337	1419	1414	1343	12.7778	11.5515	10.4768	41.4252	40.4074	39.0206
FBgn0050049	36.5126	57.4954	39.7881	166.703	160.365	155.111	44.5987	160.726	-1.83109	1.47135e-15	3.97178e-14	CG30049	2R	12355671	12359087	+	2796	protein_coding	-	-	40	78	35	151	149	143	0.710222	1.131	0.777152	3.14847	3.04115	2.96753
FBgn0085334	0.912816	8.84544	5.68402	22.0799	11.839	21.6938	5.14742	18.5376	-1.82085	0.00764634	0.0346042	CG34305	3R	4242785	4243146	-	300	protein_coding	-	-	1	12	5	20	11	20	0.165482	1.62168	1.03472	3.88659	2.09248	3.86816
FBgn0039820	13.6922	9.58256	10.2312	39.7438	48.4324	29.2866	11.1687	39.1543	-1.81267	4.04691e-05	0.000341635	CG15554	3R	31126149	31127335	+	801	protein_coding	-	-	15	13	9	36	45	27	0.929672	0.657984	0.697566	2.62018	3.20604	1.95581
FBgn0032615	12.7794	14.0053	17.0521	48.5757	43.051	60.7426	14.6123	50.7898	-1.8082	2.41903e-06	2.56284e-05	CG6012	2L	16860029	16861489	-	1041	protein_coding	-	adh_short	14	19	15	44	40	56	0.667649	0.739959	0.894573	2.46412	2.1928	3.12128
FBgn0043471	346.87	426.792	277.38	1211.08	1177.45	1296.2	350.348	1228.24	-1.79981	3.05922e-49	2.95097e-47	kappaTry	2R	11337797	11338733	-	937	protein_coding	-	Trypsin	380	579	244	1097	1094	1195	20.1333	25.0521	16.1669	68.2539	66.6296	73.9987
FBgn0043783	3787.27	4773.59	4284.61	15058.5	14741.7	14596.7	4281.82	14799	-1.78867	8.06865e-120	3.59029e-117	CG32444	3L	21636947	21639060	+	1280	protein_coding	-	Aldose_epim	4149	6476	3769	13640	13697	13457	160.918	205.117	182.806	621.248	610.668	610.006
FBgn0262621	10.041	5.89696	11.368	20.9759	35.5171	35.7948	9.10199	30.7626	-1.78776	0.000360764	0.00245263	CG43145	2L	3701826	3702248	+	361	protein_coding	-	-	11	8	10	19	33	33	1.51271	0.898437	1.71976	3.06836	5.2167	5.30399
FBgn0266810	26.4717	37.5931	44.3353	111.503	128.077	131.247	36.1334	123.609	-1.78382	2.92264e-12	5.99033e-11	CR45272	2R	17121095	17124636	+	3542	lincRNA	-	Serpin	29	51	39	101	119	121	0.406463	0.583749	0.683583	1.66239	1.91729	1.98213
FBgn0030763	25.5588	23.5878	17.0521	85.0076	77.4918	67.2508	22.0662	76.5834	-1.78	1.46355e-08	2.10445e-07	CG9782	X	16615028	16621589	-	1406	protein_coding	-	-	28	32	15	77	72	62	0.988653	0.922719	0.66234	3.19276	2.92238	2.5586
FBgn0034249	157.004	128.996	184.162	446.014	505.849	646.475	156.721	532.779	-1.77606	1.83523e-28	9.81208e-27	RhoGAP54D	2R	17586425	17590884	-	3791	protein_coding	-	RhoGAP	172	175	162	404	470	596	2.2524	1.8715	2.653	6.21281	7.07511	9.12197
FBgn0035355	324.962	449.643	278.517	1187.9	1286.15	1145.43	351.041	1206.49	-1.77143	3.95007e-41	3.28237e-39	CG16985	3L	2599297	2600242	+	641	protein_coding	-	4HBT	356	610	245	1076	1195	1056	27.5717	38.5813	23.7292	97.8621	106.39	95.5877
FBgn0262365	37.4254	22.8507	28.4201	102.671	94.7122	103.046	29.5654	100.143	-1.76897	2.19333e-10	3.81043e-09	CG43063	3R	13086224	13086761	+	488	protein_coding	-	-	41	31	25	93	88	95	4.17095	2.57541	3.1805	11.1102	10.2909	11.2954
FBgn0033294	811.493	771.765	878.749	2521.52	2939.31	2902.63	820.669	2787.82	-1.76707	5.94882e-95	1.82351e-92	Mal-A4	2R	8458815	8460884	+	1786	protein_coding	-	-	889	1047	773	2284	2731	2676	24.7111	23.7668	26.8703	74.5547	87.2629	86.9362
FBgn0028987	155.179	190.177	151.195	402.958	583.341	702.879	165.517	563.059	-1.76087	2.27808e-24	9.85074e-23	Spn28F	2L	8240414	8241800	-	1213	protein_coding	-	Serpin	170	258	133	365	542	648	6.9576	8.6231	6.80716	17.5425	25.4993	30.9963
FBgn0026755	257.414	228.507	267.149	898.651	715.723	853.651	251.023	822.675	-1.71736	1.93871e-46	1.73653e-44	Ugt37b1	2L	6225048	6226842	+	1740	protein_coding	-	UDPGT	282	310	235	814	665	787	8.04583	7.22299	8.38482	27.2732	21.8103	26.2435
FBgn0035941	62.9843	66.3408	63.661	235.151	164.67	232.124	64.3287	210.648	-1.70919	5.8217e-17	1.74955e-15	CG13313	3L	8958857	8960921	+	1394	protein_coding	-	-	69	90	56	213	153	214	2.4573	2.61749	2.49402	8.90794	6.26351	8.90732
FBgn0264709	20.9948	19.9022	32.9673	64.0317	81.7969	91.1139	24.6214	78.9808	-1.70706	7.18596e-08	9.46735e-07	CR43978	3L	21684000	21684951	+	952	lincRNA	-	-	23	27	29	58	76	84	1.19939	1.14982	1.8912	3.55182	4.55581	5.11963
FBgn0041711	117.753	130.47	97.7651	430.558	337.95	363.371	115.33	377.293	-1.69853	2.23583e-26	1.08595e-24	yellow-e	3R	13409543	13415286	-	1844	protein_coding	-	-	129	177	86	390	314	335	3.47296	3.8915	2.89543	12.33	9.71758	10.541
FBgn0033999	1153.8	1097.57	884.433	3342.89	3325.69	3488.36	1045.27	3385.65	-1.69231	1.10416e-80	2.23981e-78	CG8093	2R	15214060	15215686	-	1555	protein_coding	-	-	1264	1489	778	3028	3090	3216	40.3541	38.8212	31.0616	113.524	113.401	120
FBgn0035670	3839.3	4283.4	2679.45	12289.7	11055.5	11455.4	3600.72	11600.2	-1.68736	8.91439e-18	2.80103e-16	CG10472	3L	6061372	6062910	-	936	protein_coding	-	Trypsin	4206	5811	2357	11132	10272	10561	223.082	251.698	156.336	693.358	626.28	654.674
FBgn0010044	32.8614	66.3408	25.0097	137.999	157.136	112.808	41.4039	135.981	-1.6833	7.63475e-09	1.12876e-07	GstD8	3R	12380008	12380815	+	808	protein_coding	-	GST_N	36	90	22	125	146	104	2.21188	4.51581	1.69039	9.01901	10.3117	7.46823
FBgn0052072	57.5074	140.79	31.8305	236.255	182.967	321.068	76.7093	246.763	-1.6798	0.0083496	0.037165	Elo68alpha	3L	11101875	11103030	-	937	protein_coding	-	ELO	63	191	28	214	170	296	3.33789	8.26416	1.85521	13.3148	10.3538	18.3294
FBgn0044048	9.12816	20.6394	14.7784	36.4318	40.8985	66.1661	14.8487	47.8321	-1.67143	6.72336e-05	0.000542034	Ilp5	3L	9823349	9823897	-	478	protein_coding	-	-	10	28	13	33	38	61	1.03859	2.37484	1.68846	4.02482	4.53675	7.40454
FBgn0039312	267.455	465.86	227.361	1034.44	906.224	1118.32	320.225	1019.66	-1.66813	3.22294e-07	3.90319e-06	CG10514	3R	25278427	25279846	-	1358	protein_coding	-	-	293	632	200	937	842	1031	10.7112	18.8678	9.14335	40.2254	35.3836	44.0509
FBgn0051266	104.061	109.094	136.416	368.734	410.061	322.153	116.524	366.983	-1.66458	2.33908e-25	1.07551e-23	CG31266	3R	17132662	17133719	+	993	protein_coding	-	Trypsin	114	148	120	334	381	297	5.69937	6.04251	7.50252	19.6091	21.896	17.3541
FBgn0015001	64.8099	60.4438	61.3874	215.279	190.501	185.482	62.2137	197.087	-1.66399	1.20184e-17	3.73381e-16	iotaTry	2R	11356720	11357537	+	818	protein_coding	-	Trypsin	71	82	54	195	177	171	4.309	4.06411	4.09841	13.8977	12.3484	12.1294
FBgn0032726	475.577	510.824	444.49	1313.75	1744.64	1454.57	476.964	1504.32	-1.65427	2.35236e-52	2.47699e-50	CG10621	2L	18952206	18954431	-	1519	protein_coding	-	-	521	693	391	1190	1621	1341	17.0275	18.4961	15.9806	45.672	60.8996	51.2232
FBgn0031097	18.2563	34.6446	9.09443	69.5516	62.424	69.4201	20.6651	67.1319	-1.6525	1.02943e-05	9.72603e-05	obst-A	X	20239855	20243209	+	1905	protein_coding	-	CBM_14	20	47	8	63	58	64	0.521202	1.00025	0.260718	1.928	1.73749	1.94931
FBgn0002569	1318.11	1475.71	1421	4158.75	4376.14	4712.98	1404.94	4415.95	-1.65171	1.62765e-107	6.2366e-105	Mal-A2	2R	8453627	8455782	+	2036	protein_coding	-	-	1444	2002	1250	3767	4066	4345	35.2096	39.8649	38.116	107.864	113.967	123.825
FBgn0038194	4244.59	4281.19	4497.2	14472.3	12720.5	13687.7	4340.99	13626.8	-1.6507	2.04694e-140	1.22763e-137	Cyp6d5	3R	14029228	14031483	+	1640	protein_coding	-	p450	4650	5808	3956	13109	11819	12619	140.76	143.578	149.757	466	411.269	446.454
FBgn0053346	629.843	628.026	577.496	2035.77	1909.31	1796.25	611.788	1913.77	-1.64294	6.15486e-83	1.32656e-80	CG33346	3R	28669233	28670452	+	1096	protein_coding	-	-	690	852	508	1844	1774	1656	31.2543	31.5162	28.7759	98.0869	92.3703	87.6689
FBgn0259952	489.269	981.844	454.721	1861.33	1992.19	2163.96	641.945	2005.83	-1.64245	6.62297e-06	6.48844e-05	Sfp24Bb	2L	3669261	3669775	-	456	protein_coding	-	-	536	1332	400	1686	1851	1995	58.354	118.425	54.4591	215.553	231.649	253.848
FBgn0267408	4468.23	4376.28	4135.69	14565	12633.3	13274.4	4326.74	13490.9	-1.64023	9.83295e-128	4.84413e-125	AOX1	3R	15532137	15537292	-	4228	protein_coding	-	-	4895	5937	3638	13193	11738	12238	57.4763	56.9294	53.4199	181.915	158.434	167.947
FBgn0051674	185.302	204.919	175.068	597.261	566.121	594.41	188.43	585.931	-1.63014	6.79101e-41	5.47808e-39	CG31674	2L	20831262	20832859	+	1276	protein_coding	-	2-Hacid_dh_C	203	278	154	541	526	548	7.89799	8.83281	7.49282	24.7176	23.5247	24.9187
FBgn0035665	3599.23	5403.83	3140.99	13469.8	12816.3	11158.2	4048.02	12481.4	-1.62423	3.29027e-10	5.63101e-09	Jon65Aiii	3L	6050757	6051690	+	875	protein_coding	-	Trypsin	3943	7331	2763	12201	11908	10287	223.712	339.672	196.042	812.92	776.641	682.145
FBgn0261631	32.8614	27.2734	32.9673	107.087	97.941	80.267	31.034	95.0985	-1.62407	4.52083e-09	6.86788e-08	CG42714	3L	6233491	6234056	-	451	protein_coding	-	-	36	37	29	97	91	74	3.96275	3.32606	3.99206	12.5388	11.5147	9.52031
FBgn0030607	161.568	145.95	185.299	503.421	508.002	489.195	164.272	500.206	-1.61628	1.72276e-34	1.16489e-32	dob	X	15067007	15069091	+	1855	protein_coding	-	-	177	198	163	456	472	451	4.73697	4.32739	5.4553	14.3312	14.5207	14.1068
FBgn0262622	39.2511	28.0106	42.0617	91.6315	109.78	129.078	36.4411	110.163	-1.61346	1.66547e-09	2.65897e-08	CR43146	3L	13282393	13283410	+	960	lincRNA	-	-	43	38	37	83	102	119	2.22366	1.60479	2.3928	5.04043	6.06343	7.19236
FBgn0030895	43.8152	64.1294	55.7034	207.551	158.212	134.502	54.5493	166.755	-1.6059	5.4483e-12	1.08919e-10	CG7135	X	18103653	18105393	+	1518	protein_coding	-	-	48	87	49	188	147	124	1.56979	2.32355	2.00401	7.22015	5.52631	4.73965
FBgn0263498	15.5179	25.7992	32.9673	70.6556	76.4155	74.8436	24.7615	73.9716	-1.59268	6.5105e-07	7.56578e-06	CR43487	3R	6127229	6127955	-	727	lincRNA	-	-	17	35	29	64	71	69	1.16088	1.95181	2.4765	5.13223	5.57331	5.50694
FBgn0000473	445.454	431.215	468.363	1426.36	1221.57	1397.08	448.344	1348.34	-1.59086	2.64937e-62	3.51398e-60	Cyp6a2	2R	6779749	6781491	-	1674	protein_coding	-	p450	488	585	412	1292	1135	1288	14.4722	14.1679	15.2798	44.9953	38.6928	44.6433
FBgn0031942	62.9843	81.8203	67.0714	236.255	209.874	193.075	70.6253	213.068	-1.58389	2.10263e-16	6.04244e-15	CG7203	2L	7752170	7753186	-	730	protein_coding	-	-	69	111	59	214	195	178	4.69242	6.1646	5.0177	17.0904	15.2441	14.1479
FBgn0053965	10.9538	11.0568	5.68402	15.4559	23.6781	44.4723	9.23154	27.8688	-1.57008	0.00369691	0.0187758	CG33965	3L	1232882	1234015	+	1026	protein_coding	-	-	12	15	5	14	22	41	0.580637	0.592719	0.302551	0.795502	1.22367	2.31864
FBgn0038069	42.9023	36.1189	44.3353	96.0475	123.772	141.01	41.1189	120.276	-1.5577	6.90634e-10	1.13818e-08	CG11608	3R	12638481	12640033	+	1379	protein_coding	-	-	47	49	39	87	115	130	1.69202	1.44058	1.7558	3.67803	4.75908	5.46984
FBgn0038481	298.491	272.734	345.588	991.387	852.41	837.381	305.604	893.726	-1.55516	4.02768e-41	3.32682e-39	CG17475	3R	17129339	17130426	-	1088	protein_coding	-	Trypsin	327	370	304	898	792	772	14.9207	13.7872	17.3468	48.118	41.5418	41.1703
FBgn0028532	172.522	183.543	160.289	471.406	482.171	568.377	172.118	507.318	-1.55442	2.98452e-31	1.78993e-29	CG7968	2L	13849400	13850329	+	867	protein_coding	-	-	189	249	141	427	448	524	10.8222	11.6435	10.0966	28.7124	29.4882	35.0678
FBgn0259957	8.21534	9.58256	7.95763	14.3519	22.6018	39.0488	8.58518	25.3342	-1.55356	0.00444321	0.0219283	CG42467	2L	3701290	3701699	+	361	protein_coding	-	-	9	13	7	13	21	36	1.23767	1.45996	1.20383	2.09941	3.31972	5.78617
FBgn0262854	4.56408	9.58256	7.95763	24.2879	25.8306	15.1857	7.36809	21.768	-1.55274	0.00630204	0.0295079	CG43218	3L	21258020	21258758	+	682	protein_coding	-	CBM_14	5	13	7	22	24	14	0.363963	0.772794	0.637219	1.88061	2.00824	1.19108
FBgn0266702	41.9895	46.4386	28.4201	93.8395	117.314	135.586	38.9494	115.58	-1.5501	4.42567e-09	6.73815e-08	CR45192	3R	5835478	5836178	-	649	lincRNA	-	-	46	63	25	85	109	125	3.51872	3.93551	2.3915	7.63545	9.58454	11.1754
FBgn0033597	8.21534	5.89696	11.368	40.8478	15.0679	17.355	8.49345	24.4236	-1.55001	0.00670187	0.031095	Cpr47Ea	2R	11251751	11253398	-	829	protein_coding	-	Chitin_bind_4	9	8	10	37	14	16	0.538963	0.391237	0.748895	2.602	0.963747	1.11985
FBgn0034784	9.12816	6.63408	5.68402	8.83195	23.6781	30.3713	7.14875	20.9604	-1.54699	0.0109573	0.0467509	CG9826	2R	22840739	22842977	+	2096	protein_coding	-	MFS_1	10	9	5	8	22	28	0.236853	0.174083	0.1481	0.222515	0.598992	0.775109
FBgn0259101	633.494	599.278	688.903	1917.64	1828.59	1853.73	640.559	1866.65	-1.5469	3.08612e-77	5.75269e-75	CG42249	X	11096273	11108148	+	2648	protein_coding	-	-	694	813	606	1737	1699	1709	13.0111	12.4474	14.2079	38.2421	36.6155	37.4473
FBgn0034511	132.358	168.063	121.638	389.71	350.866	498.957	140.687	413.178	-1.54424	1.63069e-20	5.95074e-19	GNBP-like3	2R	20526311	20526825	+	515	protein_coding	-	-	145	228	107	353	326	460	13.9776	17.9487	12.8989	39.9602	36.1243	51.8259
FBgn0040959	52.0305	129.733	50.0194	203.135	255.077	221.277	77.261	226.496	-1.54386	0.000802173	0.00502963	Peritrophin-15a	2L	8395665	8396096	-	361	protein_coding	-	-	57	176	44	184	237	204	7.8386	19.7656	7.56695	29.7147	37.4654	32.7883
FBgn0035679	537.648	537.36	571.812	1706.78	1536.92	1551.11	548.94	1598.27	-1.54357	6.94762e-71	1.11437e-68	CG10467	3L	6093204	6094747	-	1544	protein_coding	-	Aldose_epim	589	729	503	1546	1428	1430	18.9382	19.1419	20.2253	58.3744	52.7801	53.7384
FBgn0040582	115.928	198.285	126.185	400.75	400.374	489.195	146.799	430.106	-1.5383	3.2035e-18	1.02527e-16	CG5791	3R	22087075	22088501	+	1301	protein_coding	-	-	127	269	111	363	372	451	4.84616	8.38262	5.29689	16.2663	16.3176	20.1138
FBgn0052523	155.179	153.321	192.12	497.901	481.095	453.4	166.873	477.466	-1.52578	1.16233e-29	6.65277e-28	CG32523	X	21217878	21218835	+	891	protein_coding	-	Trypsin	170	208	169	451	447	418	9.47201	9.46434	11.7756	29.5093	28.6299	27.2204
FBgn0051343	2017.32	2379.42	1776.82	5665.7	5690.27	6377.98	2057.86	5911.31	-1.52018	5.10145e-61	6.57657e-59	CG31343	3R	21745266	21749003	+	3004	protein_coding	-	-	2210	3228	1563	5132	5287	5880	36.5227	43.5651	32.3024	99.5972	100.438	113.573
FBgn0037782	111.364	199.022	60.2506	325.678	345.484	388.319	123.545	353.161	-1.51007	0.00147478	0.00861913	Npc2d	3R	10055356	10056083	-	661	protein_coding	-	-	122	270	53	295	321	358	9.16283	16.5603	4.97794	26.0184	27.7136	31.4252
FBgn0035300	549.515	433.427	496.783	1440.71	1367.95	1387.32	493.242	1398.66	-1.50681	6.39401e-54	7.05592e-52	CG1139	3L	1971638	1974285	+	1578	protein_coding	-	Aa_trans	602	588	437	1305	1271	1279	18.9392	15.1069	17.1929	48.213	45.9651	47.0283
FBgn0034085	237.332	245.461	206.898	673.436	648.994	645.39	229.897	655.94	-1.50605	6.08876e-39	4.7451e-37	Ptp52F	2R	16171112	16178307	-	4589	protein_coding	-	Y_phosphatase	260	333	182	610	603	595	2.81272	2.94192	2.46223	7.74947	7.49874	7.52307
FBgn0265264	8700.05	8325.77	8865.93	23647.6	22812.7	27025	8630.58	24495.1	-1.50516	1.40413e-101	4.72403e-99	CG17097	2L	10646415	10650152	+	3392	protein_coding	-	Abhydrolase_1	9531	11295	7799	21420	21196	24915	139.493	135	142.744	368.149	356.605	426.188
FBgn0038938	769.504	1175.71	940.137	2837.27	2615.35	2743.18	961.782	2731.93	-1.50372	5.33176e-41	4.35185e-39	CG7084	3R	22298805	22304420	+	3810	protein_coding	-	Sugar_tr	843	1595	827	2570	2430	2529	10.9843	16.9723	13.4758	39.325	36.3974	38.5141
FBgn0028986	737.555	742.28	968.557	2135.12	2183.76	2601.09	816.131	2306.66	-1.50287	1.4089e-44	1.2071e-42	Spn38F	2L	20836621	20837985	-	1198	protein_coding	-	Serpin	808	1007	852	1934	2029	2398	33.4831	34.0783	44.1528	94.1153	96.6528	116.142
FBgn0036780	13.6922	30.2219	9.09443	52.9917	35.5171	66.1661	17.6695	51.5583	-1.50252	0.000413438	0.00277517	CG7330	3L	18148923	18153807	+	1166	protein_coding	-	-	15	41	8	48	33	61	0.638651	1.42558	0.425958	2.39996	1.61512	3.03548
