# Supplementary material for: Auxin exposure disrupts feeding behavior and fatty acid metabolism in adult Drosophila
Source: eLife. 2024 Jan 19;12:RP91953. doi: 10.7554/eLife.91953 (PMC10945601; doi:10.7554/eLife.91953)
Supplement: Figure 3—figure supplement 2—source data 1. [file elife-91953-fig3-figsupp2-data1.xlsx]

## Sheet: OreR_GstE3_males
1 Target	2 Sample	3 Mean Cq	4 Control group Avg Cq per Target	5 DCq per sample per Target (Col. 4-Col 3)	6 Relative quantity (RQ) 2^DCq	7 Norm. factor GEOMEAN [RQ(HRPT+Actin)]	8 Normalized expression per sample (A)	9 Log2 Normalized expression (B)	10 Bio group expression (C)	11 Log2(C) (D)	12 Standard deviation (SD) of (B) (E)	13 Standard error of the mean (SEM) (F)
Rp49	OreR_0mM_males_N1_W1	22.46	22.4767	0.0166667	1.01162
Rp49	OreR_0mM_males_N1_W2	22.42		0.0566667	1.04006
Rp49	OreR_0mM_males_N1_W3	22.55		-0.0733333	0.950439
Rp49	OreR_10mM_males_N1_W1	22.3		0.176667	1.13027
Rp49	OreR_10mM_males_N1_W2	22.27		0.206667	1.15402
Rp49	OreR_10mM_males_N1_W3	22.33		0.146667	1.10701
Act5C	OreR_0mM_males_N1_W1	24.66	24.5967	-0.0633333	0.95705
Act5C	OreR_0mM_males_N1_W2	24.45		0.146667	1.10701
Act5C	OreR_0mM_males_N1_W3	24.68		-0.0833333	0.943874
Act5C	OreR_10mM_males_N1_W1	23.36		1.23667	2.35653
Act5C	OreR_10mM_males_N1_W2	23.53		1.06667	2.09459
Act5C	OreR_10mM_males_N1_W3	24.05		0.546667	1.46071
GstE3	OreR_0mM_males_N1_W1	26.49	26.44	-0.05	0.965936	0.983957	0.981686	0.0266667	0.899171	0.153333	0.198137	0.114395
GstE3	OreR_0mM_males_N1_W2	26.39		0.05	1.03526	1.07301	0.964821	0.0516667
GstE3	OreR_0mM_males_N1_W3	26.9		-0.46	0.726986	0.947151	0.76755	0.381667
GstE3	OreR_10mM_males_N1_W1	25.08		1.36	2.56685	1.63203	1.5728	0.653333	1.60214	1.60269	0.046188	0.0266667
GstE3	OreR_10mM_males_N1_W2	25.15		1.29	2.44528	1.55473	1.5728	0.653333
GstE3	OreR_10mM_males_N1_W3	25.36		1.08	2.11404	1.27162	1.66248	0.733333
Rp49	OreR_0mM_males_N2_W1	22.2	22.1733	-0.0266667	0.981686
Rp49	OreR_0mM_males_N2_W2	22.14		0.0333333	1.02337
Rp49	OreR_0mM_males_N2_W3	22.18		-0.00666667	0.99539
Rp49	OreR_10mM_males_N2_W1	22.03		0.143333	1.10445
Rp49	OreR_10mM_males_N2_W2	22.08		0.0933333	1.06683
Rp49	OreR_10mM_males_N2_W3	22.21		-0.0366667	0.974905
Act5C	OreR_0mM_males_N2_W1	24.73	25.0067	0.276667	1.21139
Act5C	OreR_0mM_males_N2_W2	26.28		-1.27333	0.413703
Act5C	OreR_0mM_males_N2_W3	24.01		0.996667	1.99538
Act5C	OreR_10mM_males_N2_W1	24.34		0.666667	1.5874
Act5C	OreR_10mM_males_N2_W2	24.66		0.346667	1.27162
Act5C	OreR_10mM_males_N2_W3	24.22		0.786667	1.72508
GstE3	OreR_0mM_males_N2_W1	26.87	26.85	-0.02	0.986233	1.09051	0.904379	0.145	0.99539	0.433333	0.257407	0.148614
GstE3	OreR_0mM_males_N2_W2	26.83		0.02	1.01396	0.650671	1.55833	0.64
GstE3	OreR_0mM_males_N2_W3	26.87		-0.02	0.986233	1.40932	0.699793	0.515
GstE3	OreR_10mM_males_N2_W1	25.94		0.91	1.87905	1.32409	1.41912	0.505	1.90968	2.00776	0.547365	0.316021
GstE3	OreR_10mM_males_N2_W2	25.08		1.77	3.41054	1.16473	2.92817	1.55
GstE3	OreR_10mM_males_N2_W3	25.73		1.12	2.17347	1.29684	1.67597	0.745
Rp49	OreR_0mM_males_N3_W1	22.1	22.1133	0.0133333	1.00928
Rp49	OreR_0mM_males_N3_W2	22.11		0.00333333	1.00231
Rp49	OreR_0mM_males_N3_W3	22.13		-0.0166667	0.988514
Rp49	OreR_10mM_males_N3_W1	22.45		-0.336667	0.791869
Rp49	OreR_10mM_males_N3_W2	22.43		-0.316667	0.802923
Rp49	OreR_10mM_males_N3_W3	22.41		-0.296667	0.814131
Act5C	OreR_0mM_males_N3_W1	24.14	24.1367	-0.00333333	0.997692
Act5C	OreR_0mM_males_N3_W2	24.01		0.126667	1.09177
Act5C	OreR_0mM_males_N3_W3	24.26		-0.123333	0.918064
Act5C	OreR_10mM_males_N3_W1	23.81		0.326667	1.25411
Act5C	OreR_10mM_males_N3_W2	23.73		0.406667	1.32562
Act5C	OreR_10mM_males_N3_W3	23.8		0.336667	1.26284
GstE3	OreR_0mM_males_N3_W1	26.35	26.215	-0.135	0.91067	1.00347	0.907519	0.14	1.03407	0.141667	0.0725144	0.0418662
GstE3	OreR_0mM_males_N3_W2	26.08		0.135	1.09809	1.04608	1.04972	0.07
GstE3	OreR_0mM_males_N3_W3	26.07		0.145	1.10573	0.952638	1.1607	0.215
GstE3	OreR_10mM_males_N3_W1	25.38		0.835	1.78386	0.99654	1.79005	0.84	1.72708	1.72972	0.0982768	0.0567401
GstE3	OreR_10mM_males_N3_W2	25.32		0.895	1.85961	1.03168	1.8025	0.85
GstE3	OreR_10mM_males_N3_W3	25.52		0.695	1.61888	1.01396	1.5966	0.675

## Sheet: OreR_GstD7_males
1 Target	2 Sample	3 Mean Cq	4 Control group Avg Cq per Target	5 DCq per sample per Target (Col. 4-Col 3)	6 Relative quantity (RQ) 2^DCq	7 Norm. factor GEOMEAN [RQ(HRPT+Actin)]	8 Normalized expression per sample (A)	9 Log2 Normalized expression (B)	10 Bio group expression (C)	11 Log2(C) (D)	12 Standard deviation (SD) of (B) (E)	13 Standard error of the mean (SEM) (F)
Rp49	OreR_0mM_males_N1_W1	22.46	22.4767	0.0166667	1.01162
Rp49	OreR_0mM_males_N1_W2	22.42		0.0566667	1.04006
Rp49	OreR_0mM_males_N1_W3	22.55		-0.0733333	0.950439
Rp49	OreR_10mM_males_N1_W1	22.3		0.176667	1.13027
Rp49	OreR_10mM_males_N1_W2	22.27		0.206667	1.15402
Rp49	OreR_10mM_males_N1_W3	22.33		0.146667	1.10701
Act5C	OreR_0mM_males_N1_W1	24.66	24.5967	-0.0633333	0.95705
Act5C	OreR_0mM_males_N1_W2	24.45		0.146667	1.10701
Act5C	OreR_0mM_males_N1_W3	24.68		-0.0833333	0.943874
Act5C	OreR_10mM_males_N1_W1	23.36		1.23667	2.35653
Act5C	OreR_10mM_males_N1_W2	23.53		1.06667	2.09459
Act5C	OreR_10mM_males_N1_W3	24.05		0.546667	1.46071
GstD7	OreR_0mM_males_N1_W1	32.54	32.5	-0.04	0.972655	0.983957	0.988514	0.0166667	1.14605	0.248889	0.363946	0.210124
GstD7	OreR_0mM_males_N1_W2	32.46		0.04	1.02811	1.07301	0.958157	0.0616667
GstD7	OreR_0mM_males_N1_W3	31.91		0.59	1.50525	0.947151	1.58924	0.668333
GstD7	OreR_10mM_males_N1_W1	30.65		1.85	3.605	1.63203	2.20891	1.14333	2.64512	2.68457	0.301164	0.173877
GstD7	OreR_10mM_males_N1_W2	30.53		1.97	3.91768	1.55473	2.51984	1.33333
GstD7	OreR_10mM_males_N1_W3	30.42		2.08	4.22807	1.27162	3.32495	1.73333
Rp49	OreR_0mM_males_N2_W1	22.2	22.1733	-0.0266667	0.981686
Rp49	OreR_0mM_males_N2_W2	22.14		0.0333333	1.02337
Rp49	OreR_0mM_males_N2_W3	22.18		-0.00666667	0.99539
Rp49	OreR_10mM_males_N2_W1	22.03		0.143333	1.10445
Rp49	OreR_10mM_males_N2_W2	22.08		0.0933333	1.06683
Rp49	OreR_10mM_males_N2_W3	22.21		-0.0366667	0.974905
Act5C	OreR_0mM_males_N2_W1	24.73	25.0067	0.276667	1.21139
Act5C	OreR_0mM_males_N2_W2	26.28		-1.27333	0.413703
Act5C	OreR_0mM_males_N2_W3	24.01		0.996667	1.99538
Act5C	OreR_10mM_males_N2_W1	24.34		0.666667	1.5874
Act5C	OreR_10mM_males_N2_W2	24.66		0.346667	1.27162
Act5C	OreR_10mM_males_N2_W3	24.22		0.786667	1.72508
GstD7	OreR_0mM_males_N2_W1	32.48	32.315	-0.165	0.891929	1.09051	0.817902	0.29	1.12117	0.358333	0.396936	0.229171
GstD7	OreR_0mM_males_N2_W2	32.15		0.165	1.12117	0.650671	1.72309	0.785
GstD7	OreR_0mM_males_N2_W3	31.82		0.495	1.40932	1.40932	1	5.28565e-15
GstD7	OreR_10mM_males_N2_W1	30.94		1.375	2.59368	1.32409	1.95884	0.97	2.41999	2.45316	0.2933	0.169337
GstD7	OreR_10mM_males_N2_W2	30.54		1.775	3.42238	1.16473	2.93834	1.555
GstD7	OreR_10mM_males_N2_W3	30.64		1.675	3.19319	1.29684	2.46229	1.3
Rp49	OreR_0mM_males_N3_W1	22.1	22.1133	0.0133333	1.00928
Rp49	OreR_0mM_males_N3_W2	22.11		0.00333333	1.00231
Rp49	OreR_0mM_males_N3_W3	22.13		-0.0166667	0.988514
Rp49	OreR_10mM_males_N3_W1	22.45		-0.336667	0.791869
Rp49	OreR_10mM_males_N3_W2	22.43		-0.316667	0.802923
Rp49	OreR_10mM_males_N3_W3	22.41		-0.296667	0.814131
Act5C	OreR_0mM_males_N3_W1	24.14	24.1367	-0.00333333	0.997692
Act5C	OreR_0mM_males_N3_W2	24.01		0.126667	1.09177
Act5C	OreR_0mM_males_N3_W3	24.26		-0.123333	0.918064
Act5C	OreR_10mM_males_N3_W1	23.81		0.326667	1.25411
Act5C	OreR_10mM_males_N3_W2	23.73		0.406667	1.32562
Act5C	OreR_10mM_males_N3_W3	23.8		0.336667	1.26284
GstD7	OreR_0mM_males_N3_W1	31.54	31.505	-0.035	0.976032	1.00347	0.972655	0.04	0.891929	0.165	0.225222	0.130032
GstD7	OreR_0mM_males_N3_W2	31.47		0.035	1.02456	1.04608	0.97942	0.03
GstD7	OreR_0mM_males_N3_W3	32		-0.495	0.709562	0.952638	0.744839	0.425
GstD7	OreR_10mM_males_N3_W1	30.74		0.765	1.69937	0.99654	1.70527	0.77	1.61515	1.61648	0.0714726	0.0412647
GstD7	OreR_10mM_males_N3_W2	30.83		0.675	1.5966	1.03168	1.54756	0.63
GstD7	OreR_10mM_males_N3_W3	30.81		0.695	1.61888	1.01396	1.5966	0.675

## Sheet: OreR_Fad2_males
1 Target	2 Sample	3 Mean Cq	4 Control group Avg Cq per Target	5 DCq per sample per Target (Col. 4-Col 3)	6 Relative quantity (RQ) 2^DCq	7 Norm. factor GEOMEAN [RQ(HRPT+Actin)]	8 Normalized expression per sample (A)	9 Log2 Normalized expression (B)	10 Bio group expression (C)	11 Log2(C) (D)	12 Standard deviation (SD) of (B) (E)	13 Standard error of the mean (SEM) (F)
Rp49	OreR_0mM_males_N1_W1	22.17	22.1967	0.0266667	1.01866
Rp49	OreR_0mM_males_N1_W2	22.16		0.0366667	1.02574
Rp49	OreR_0mM_males_N1_W3	22.26		-0.0633333	0.95705
Rp49	OreR_10mM_males_N1_W1	21.98		0.216667	1.16205
Rp49	OreR_10mM_males_N1_W2	22.24		-0.0433333	0.97041
Rp49	OreR_10mM_males_N1_W3	21.98		0.216667	1.16205
Act5C	OreR_0mM_males_N1_W1	24.26	24.3067	0.0466667	1.03288
Act5C	OreR_0mM_males_N1_W2	24.24		0.0666667	1.04729
Act5C	OreR_0mM_males_N1_W3	24.42		-0.113333	0.92445
Act5C	OreR_10mM_males_N1_W1	23.31		0.996667	1.99538
Act5C	OreR_10mM_males_N1_W2	23.41		0.896667	1.86176
Act5C	OreR_10mM_males_N1_W3	23.89		0.416667	1.33484
Fad2	OreR_0mM_males_N1_W1	38	38.19	0.19	1.14076	1.02574	1.11214	0.153333	1.02574	0.197778	0.0441693	0.0255011
Fad2	OreR_0mM_males_N1_W2	38.38		-0.19	0.876606	1.03646	0.845768	0.241667
Fad2	OreR_0mM_males_N1_W3	38.08		0.11	1.07923	0.940609	1.14737	0.198333
Fad2	OreR_10mM_males_N1_W1	36.37		1.82	3.53081	1.52274	2.31873	1.21333	2.85469	3.1844	0.803181	0.463717
Fad2	OreR_10mM_males_N1_W2	36.86		1.33	2.51403	1.34412	1.87038	0.903333
Fad2	OreR_10mM_males_N1_W3	35.45		2.74	6.6807	1.24545	5.36409	2.42333
Rp49	OreR_0mM_males_N2_W1	21.87	21.9033	0.0333333	1.02337
Rp49	OreR_0mM_males_N2_W2	21.88		0.0233333	1.0163
Rp49	OreR_0mM_males_N2_W3	21.96		-0.0566667	0.961483
Rp49	OreR_10mM_males_N2_W1	21.81		0.0933333	1.06683
Rp49	OreR_10mM_males_N2_W2	22.06		-0.156667	0.897095
Rp49	OreR_10mM_males_N2_W3	22.29		-0.386667	0.764895
Act5C	OreR_0mM_males_N2_W1	23.91	23.9133	0.00333333	1.00231
Act5C	OreR_0mM_males_N2_W2	24.03		-0.116667	0.922316
Act5C	OreR_0mM_males_N2_W3	23.8		0.113333	1.08172
Act5C	OreR_10mM_males_N2_W1	24.11		-0.196667	0.872564
Act5C	OreR_10mM_males_N2_W2	24.16		-0.246667	0.842842
Act5C	OreR_10mM_males_N2_W3	23.34		0.573333	1.48796
Fad2	OreR_0mM_males_N2_W1	38.56	38.7	0.14	1.10191	1.01279	1.08799	0.121667	1.17013	0.288889	0.314494	0.181573
Fad2	OreR_0mM_males_N2_W2	38.84		-0.14	0.907519	0.968171	0.937354	0.0933333
Fad2	OreR_0mM_males_N2_W3	38.02		0.68	1.60214	1.01983	1.57098	0.651667
Fad2	OreR_10mM_males_N2_W1	37.78		0.92	1.89212	0.964821	1.9611	0.971667	2.11893	2.18548	0.433426	0.250239
Fad2	OreR_10mM_males_N2_W2	37.34		1.36	2.56685	0.869545	2.95195	1.56167
Fad2	OreR_10mM_males_N2_W3	37.89		0.81	1.75321	1.06683	1.64338	0.716667
Rp49	OreR_0mM_males_N3_W1	22.03	21.9633	-0.0666667	0.954842
Rp49	OreR_0mM_males_N3_W2	21.97		-0.00666667	0.99539
Rp49	OreR_0mM_males_N3_W3	21.89		0.0733333	1.05214
Rp49	OreR_10mM_males_N3_W1	22.21		-0.246667	0.842842
Rp49	OreR_10mM_males_N3_W2	22.15		-0.186667	0.878633
Rp49	OreR_10mM_males_N3_W3	22.19		-0.226667	0.854607
Act5C	OreR_0mM_males_N3_W1	23.9	23.84	-0.06	0.959264
Act5C	OreR_0mM_males_N3_W2	23.79		0.05	1.03526
Act5C	OreR_0mM_males_N3_W3	23.83		0.01	1.00696
Act5C	OreR_10mM_males_N3_W1	23.63		0.21	1.15669
Act5C	OreR_10mM_males_N3_W2	23.57		0.27	1.20581
Act5C	OreR_10mM_males_N3_W3	23.55		0.29	1.22264
Fad2	OreR_0mM_males_N3_W1	37.37	37.415	0.045	1.03168	0.95705	1.07798	0.108333	0.873573	0.267222	0.311984	0.180124
Fad2	OreR_0mM_males_N3_W2	37.46		-0.045	0.96929	1.01513	0.954842	0.0666667
Fad2	OreR_0mM_males_N3_W3	38		-0.585	0.666649	1.0293	0.647671	0.626667
Fad2	OreR_10mM_males_N3_W1	36.54		0.875	1.83401	0.987373	1.85746	0.893333	2.20891	2.23015	0.245153	0.141539
Fad2	OreR_10mM_males_N3_W2	35.99		1.425	2.68515	1.0293	2.6087	1.38333
Fad2	OreR_10mM_males_N3_W3	36.23		1.185	2.27363	1.02219	2.22427	1.15333

## Sheet: OreR_mag_males
1 Target	2 Sample	3 Mean Cq	4 Control group Avg Cq per Target	5 DCq per sample per Target (Col. 4-Col 3)	6 Relative quantity (RQ) 2^DCq	7 Norm. factor GEOMEAN [RQ(HRPT+Actin)]	8 Normalized expression per sample (A)	9 Log2 Normalized expression (B)	10 Bio group expression (C)	11 Log2(C) (D)	12 Standard deviation (SD) of (B) (E)	13 Standard error of the mean (SEM) (F)
Rp49	OreR_0mM_males_N1_W1	22.17	22.1967	0.0266667	1.01866
Rp49	OreR_0mM_males_N1_W2	22.16		0.0366667	1.02574
Rp49	OreR_0mM_males_N1_W3	22.26		-0.0633333	0.95705
Rp49	OreR_10mM_males_N1_W1	21.98		0.216667	1.16205
Rp49	OreR_10mM_males_N1_W2	22.24		-0.0433333	0.97041
Rp49	OreR_10mM_males_N1_W3	21.98		0.216667	1.16205
Act5C	OreR_0mM_males_N1_W1	24.26	24.3067	0.0466667	1.03288
Act5C	OreR_0mM_males_N1_W2	24.24		0.0666667	1.04729
Act5C	OreR_0mM_males_N1_W3	24.42		-0.113333	0.92445
Act5C	OreR_10mM_males_N1_W1	23.31		0.996667	1.99538
Act5C	OreR_10mM_males_N1_W2	23.41		0.896667	1.86176
Act5C	OreR_10mM_males_N1_W3	23.89		0.416667	1.33484
mag	OreR_0mM_males_N1_W1	30.2	30.07	-0.13	0.913831	1.02574	0.890899	0.166667	1.02101	0.141111	0.0546792	0.0315691
mag	OreR_0mM_males_N1_W2	29.94		0.13	1.09429	1.03646	1.0558	0.0783333
mag	OreR_0mM_males_N1_W3	29.98		0.09	1.06437	0.940609	1.13158	0.178333
mag	OreR_10mM_males_N1_W1	34.49		-4.42	0.046714	1.52274	0.0306777	5.02667	0.0331082	0.0350668	0.592706	0.342199
mag	OreR_10mM_males_N1_W2	33.92		-3.85	0.0693481	1.34412	0.0515935	4.27667
mag	OreR_10mM_males_N1_W3	35.2		-5.13	0.0285572	1.24545	0.0229293	5.44667
Rp49	OreR_0mM_males_N2_W1	21.87	21.9033	0.0333333	1.02337
Rp49	OreR_0mM_males_N2_W2	21.88		0.0233333	1.0163
Rp49	OreR_0mM_males_N2_W3	21.96		-0.0566667	0.961483
Rp49	OreR_10mM_males_N2_W1	21.81		0.0933333	1.06683
Rp49	OreR_10mM_males_N2_W2	22.06		-0.156667	0.897095
Rp49	OreR_10mM_males_N2_W3	22.29		-0.386667	0.764895
Act5C	OreR_0mM_males_N2_W1	23.91	23.9133	0.00333333	1.00231
Act5C	OreR_0mM_males_N2_W2	24.03		-0.116667	0.922316
Act5C	OreR_0mM_males_N2_W3	23.8		0.113333	1.08172
Act5C	OreR_10mM_males_N2_W1	24.11		-0.196667	0.872564
Act5C	OreR_10mM_males_N2_W2	24.16		-0.246667	0.842842
Act5C	OreR_10mM_males_N2_W3	23.34		0.573333	1.48796
mag	OreR_0mM_males_N2_W1	30.01	29.93	-0.08	0.946058	1.01279	0.934111	0.0983333	1.10445	0.208889	0.16755	0.0967353
mag	OreR_0mM_males_N2_W2	29.85		0.08	1.05702	0.968171	1.09177	0.126667
mag	OreR_0mM_males_N2_W3	29.5		0.43	1.34723	1.01983	1.32103	0.401667
mag	OreR_10mM_males_N2_W1	34.01		-4.08	0.0591286	0.964821	0.0612845	4.02833	0.0771245	0.0782679	0.306689	0.177067
mag	OreR_10mM_males_N2_W2	33.77		-3.84	0.0698304	0.869545	0.0803068	3.63833
mag	OreR_10mM_males_N2_W3	33.26		-3.33	0.0994421	1.06683	0.0932125	3.42333
Rp49	OreR_0mM_males_N3_W1	22.03	21.9633	-0.0666667	0.954842
Rp49	OreR_0mM_males_N3_W2	21.97		-0.00666667	0.99539
Rp49	OreR_0mM_males_N3_W3	21.89		0.0733333	1.05214
Rp49	OreR_10mM_males_N3_W1	22.21		-0.246667	0.842842
Rp49	OreR_10mM_males_N3_W2	22.15		-0.186667	0.878633
Rp49	OreR_10mM_males_N3_W3	22.19		-0.226667	0.854607
Act5C	OreR_0mM_males_N3_W1	23.9	23.84	-0.06	0.959264
Act5C	OreR_0mM_males_N3_W2	23.79		0.05	1.03526
Act5C	OreR_0mM_males_N3_W3	23.83		0.01	1.00696
Act5C	OreR_10mM_males_N3_W1	23.63		0.21	1.15669
Act5C	OreR_10mM_males_N3_W2	23.57		0.27	1.20581
Act5C	OreR_10mM_males_N3_W3	23.55		0.29	1.22264
mag	OreR_0mM_males_N3_W1	29.25	29.275	0.025	1.01748	0.95705	1.06314	0.0883333	0.927659	0.167222	0.173976	0.100445
mag	OreR_0mM_males_N3_W2	29.3		-0.025	0.982821	1.01513	0.968171	0.0466667
mag	OreR_0mM_males_N3_W3	29.6		-0.325	0.798298	1.0293	0.775572	0.366667
mag	OreR_10mM_males_N3_W1	33.86		-4.585	0.0416656	0.987373	0.0421984	4.56667	0.0453318	0.0453894	0.0896289	0.0517472
mag	OreR_10mM_males_N3_W2	33.64		-4.365	0.0485293	1.0293	0.0471478	4.40667
mag	OreR_10mM_males_N3_W3	33.66		-4.385	0.0478612	1.02219	0.0468221	4.41667

## Sheet: OreR_GstE3_females
1 Target	2 Sample	3 Mean Cq	4 Control group Avg Cq per Target	5 DCq per sample per Target (Col. 4-Col 3)	6 Relative quantity (RQ) 2^DCq	7 Norm. factor GEOMEAN [RQ(HRPT+Actin)]	8 Normalized expression per sample (A)	9 Log2 Normalized expression (B)	10 Bio group expression (C)	11 Log2(C) (D)	12 Standard deviation (SD) of (B) (E)	13 Standard error of the mean (SEM) (F)
Rp49	OreR_0mM_females_N1_W1	21.03	21.0467	0.0166667	1.01162
Rp49	OreR_0mM_females_N1_W2	21.04		0.00666667	1.00463
Rp49	OreR_0mM_females_N1_W3	21.07		-0.0233333	0.983957
Rp49	OreR_10mM_females_N1_W1	21.38		-0.333333	0.793701
Rp49	OreR_10mM_females_N1_W2	21.33		-0.283333	0.82169
Rp49	OreR_10mM_females_N1_W3	21.34		-0.293333	0.816014
Act5C	OreR_0mM_females_N1_W1	22.85	22.8633	0.0133333	1.00928
Act5C	OreR_0mM_females_N1_W2	22.8		0.0633333	1.04488
Act5C	OreR_0mM_females_N1_W3	22.94		-0.0766667	0.948246
Act5C	OreR_10mM_females_N1_W1	23.18		-0.316667	0.802923
Act5C	OreR_10mM_females_N1_W2	23.23		-0.366667	0.775572
Act5C	OreR_10mM_females_N1_W3	23.65		-0.786667	0.579682
GstE3	OreR_0mM_females_N1_W1	27.21	27.23	0.02	1.01396	1.01045	1.00347	0.005	0.860551	0.22	0.330038	0.190547
GstE3	OreR_0mM_females_N1_W2	27.25		-0.02	0.986233	1.02456	0.962594	0.055
GstE3	OreR_0mM_females_N1_W3	27.88		-0.65	0.63728	0.965936	0.659754	0.6
GstE3	OreR_10mM_females_N1_W1	26.31		0.92	1.89212	0.798298	2.37019	1.245	2.34026	2.34037	0.0175594	0.0101379
GstE3	OreR_10mM_females_N1_W2	26.33		0.9	1.86607	0.798298	2.33755	1.225
GstE3	OreR_10mM_females_N1_W3	26.56		0.67	1.59107	0.687771	2.31338	1.21
Rp49	OreR_0mM_females_N2_W1	21.09	21.14	0.05	1.03526
Rp49	OreR_0mM_females_N2_W2	21.2		-0.06	0.959264
Rp49	OreR_0mM_females_N2_W3	21.13		0.01	1.00696
Rp49	OreR_10mM_females_N2_W1	21.26		-0.12	0.920188
Rp49	OreR_10mM_females_N2_W2	21.08		0.06	1.04247
Rp49	OreR_10mM_females_N2_W3	21.09		0.05	1.03526
Act5C	OreR_0mM_females_N2_W1	22.94	22.9567	0.0166667	1.01162
Act5C	OreR_0mM_females_N2_W2	23.04		-0.0833333	0.943874
Act5C	OreR_0mM_females_N2_W3	22.89		0.0666667	1.04729
Act5C	OreR_10mM_females_N2_W1	23.88		-0.923333	0.527289
Act5C	OreR_10mM_females_N2_W2	23.78		-0.823333	0.565135
Act5C	OreR_10mM_females_N2_W3	23.56		-0.603333	0.658231
GstE3	OreR_0mM_females_N2_W1	27.82	28.085	0.265	1.20164	1.02337	1.17419	0.231667	1.06807	0.223889	0.0275042	0.0158796
GstE3	OreR_0mM_females_N2_W2	28.35		-0.265	0.832199	0.951538	0.874583	0.193333
GstE3	OreR_0mM_females_N2_W3	27.8		0.285	1.21841	1.02693	1.18646	0.246667
GstE3	OreR_10mM_females_N2_W1	26.93		1.155	2.22684	0.696567	3.19688	1.67667	3.26029	3.261	0.0368556	0.0212786
GstE3	OreR_10mM_females_N2_W2	26.72		1.365	2.57576	0.76755	3.35582	1.74667
GstE3	OreR_10mM_females_N2_W3	26.67		1.415	2.6666	0.825496	3.2303	1.69167
Rp49	OreR_0mM_females_N3_W1	21.15	21.23	0.08	1.05702
Rp49	OreR_0mM_females_N3_W2	21.29		-0.06	0.959264
Rp49	OreR_0mM_females_N3_W3	21.25		-0.02	0.986233
Rp49	OreR_10mM_females_N3_W1	21.22		0.01	1.00696
Rp49	OreR_10mM_females_N3_W2	21.26		-0.03	0.97942
Rp49	OreR_10mM_females_N3_W3	21.16		0.07	1.04972
Act5C	OreR_0mM_females_N3_W1	23.06	23.01	-0.05	0.965936
Act5C	OreR_0mM_females_N3_W2	22.95		0.06	1.04247
Act5C	OreR_0mM_females_N3_W3	23.02		-0.01	0.993092
Act5C	OreR_10mM_females_N3_W1	23.12		-0.11	0.926588
Act5C	OreR_10mM_females_N3_W2	23.05		-0.04	0.972655
Act5C	OreR_10mM_females_N3_W3	23.09		-0.08	0.946058
GstE3	OreR_0mM_females_N3_W1	27.35	27.62	0.27	1.20581	1.01045	1.19334	0.255	0.926588	0.28	0.031225	0.0180278
GstE3	OreR_0mM_females_N3_W2	27.89		-0.27	0.82932	1	0.82932	0.27
GstE3	OreR_0mM_females_N3_W3	27.95		-0.33	0.795536	0.989657	0.803851	0.315
GstE3	OreR_10mM_females_N3_W1	25.92		1.7	3.24901	0.965936	3.36359	1.75	3.13109	3.13908	0.126919	0.0732765
GstE3	OreR_10mM_females_N3_W2	25.97		1.65	3.13834	0.976032	3.2154	1.685
GstE3	OreR_10mM_females_N3_W3	26.12		1.5	2.82843	0.99654	2.83825	1.505

## Sheet: OreR_GstD7_females
1 Target	2 Sample	3 Mean Cq	4 Control group Avg Cq per Target	5 DCq per sample per Target (Col. 4-Col 3)	6 Relative quantity (RQ) 2^DCq	7 Norm. factor GEOMEAN [RQ(HRPT+Actin)]	8 Normalized expression per sample (A)	9 Log2 Normalized expression (B)	10 Bio group expression (C)	11 Log2(C) (D)	12 Standard deviation (SD) of (B) (E)	13 Standard error of the mean (SEM) (F)
Rp49	OreR_0mM_females_N1_W1	21.03	21.0467	0.0166667	1.01162
Rp49	OreR_0mM_females_N1_W2	21.04		0.00666667	1.00463
Rp49	OreR_0mM_females_N1_W3	21.07		-0.0233333	0.983957
Rp49	OreR_10mM_females_N1_W1	21.38		-0.333333	0.793701
Rp49	OreR_10mM_females_N1_W2	21.33		-0.283333	0.82169
Rp49	OreR_10mM_females_N1_W3	21.34		-0.293333	0.816014
Act5C	OreR_0mM_females_N1_W1	22.85	22.8633	0.0133333	1.00928
Act5C	OreR_0mM_females_N1_W2	22.8		0.0633333	1.04488
Act5C	OreR_0mM_females_N1_W3	22.94		-0.0766667	0.948246
Act5C	OreR_10mM_females_N1_W1	23.18		-0.316667	0.802923
Act5C	OreR_10mM_females_N1_W2	23.23		-0.366667	0.775572
Act5C	OreR_10mM_females_N1_W3	23.65		-0.786667	0.579682
GstD7	OreR_0mM_females_N1_W1	32.73	32.68	-0.05	0.965936	1.01045	0.955945	0.065	1.02337	0.0766667	0.068252	0.0394053
GstD7	OreR_0mM_females_N1_W2	32.63		0.05	1.03526	1.02456	1.01045	0.015
GstD7	OreR_0mM_females_N1_W3	32.58		0.1	1.07177	0.965936	1.10957	0.15
GstD7	OreR_10mM_females_N1_W1	30.11		2.57	5.93809	0.798298	7.43844	2.895	7.79924	7.82278	0.136045	0.0785458
GstD7	OreR_10mM_females_N1_W2	30.13		2.55	5.85634	0.798298	7.33603	2.875
GstD7	OreR_10mM_females_N1_W3	30.1		2.58	5.9794	0.687771	8.69388	3.12
Rp49	OreR_0mM_females_N2_W1	21.09	21.14	0.05	1.03526
Rp49	OreR_0mM_females_N2_W2	21.2		-0.06	0.959264
Rp49	OreR_0mM_females_N2_W3	21.13		0.01	1.00696
Rp49	OreR_10mM_females_N2_W1	21.26		-0.12	0.920188
Rp49	OreR_10mM_females_N2_W2	21.08		0.06	1.04247
Rp49	OreR_10mM_females_N2_W3	21.09		0.05	1.03526
Act5C	OreR_0mM_females_N2_W1	22.94	22.9567	0.0166667	1.01162
Act5C	OreR_0mM_females_N2_W2	23.04		-0.0833333	0.943874
Act5C	OreR_0mM_females_N2_W3	22.89		0.0666667	1.04729
Act5C	OreR_10mM_females_N2_W1	23.88		-0.923333	0.527289
Act5C	OreR_10mM_females_N2_W2	23.78		-0.823333	0.565135
Act5C	OreR_10mM_females_N2_W3	23.56		-0.603333	0.658231
GstD7	OreR_0mM_females_N2_W1	32.11	32.085	-0.025	0.982821	1.02337	0.960373	0.0583333	1.10829	0.187222	0.191009	0.110279
GstD7	OreR_0mM_females_N2_W2	32.06		0.025	1.01748	0.951538	1.0693	0.0966667
GstD7	OreR_0mM_females_N2_W3	31.64		0.445	1.36131	1.02693	1.32562	0.406667
GstD7	OreR_10mM_females_N2_W1	30.19		1.895	3.71922	0.696567	5.33936	2.41667	7.18506	7.56508	0.55476	0.320291
GstD7	OreR_10mM_females_N2_W2	29.82		2.265	4.80654	0.76755	6.26219	2.64667
GstD7	OreR_10mM_females_N2_W3	28.89		3.195	9.15779	0.825496	11.0937	3.47167
Rp49	OreR_0mM_females_N3_W1	21.15	21.23	0.08	1.05702
Rp49	OreR_0mM_females_N3_W2	21.29		-0.06	0.959264
Rp49	OreR_0mM_females_N3_W3	21.25		-0.02	0.986233
Rp49	OreR_10mM_females_N3_W1	21.22		0.01	1.00696
Rp49	OreR_10mM_females_N3_W2	21.26		-0.03	0.97942
Rp49	OreR_10mM_females_N3_W3	21.16		0.07	1.04972
Act5C	OreR_0mM_females_N3_W1	23.06	23.01	-0.05	0.965936
Act5C	OreR_0mM_females_N3_W2	22.95		0.06	1.04247
Act5C	OreR_0mM_females_N3_W3	23.02		-0.01	0.993092
Act5C	OreR_10mM_females_N3_W1	23.12		-0.11	0.926588
Act5C	OreR_10mM_females_N3_W2	23.05		-0.04	0.972655
Act5C	OreR_10mM_females_N3_W3	23.09		-0.08	0.946058
GstD7	OreR_0mM_females_N3_W1	32.2	32.265	0.065	1.04608	1.01045	1.03526	0.05	0.962594	0.0883333	0.053929	0.0311359
GstD7	OreR_0mM_females_N3_W2	32.33		-0.065	0.955945	1	0.955945	0.065
GstD7	OreR_0mM_females_N3_W3	32.43		-0.165	0.891929	0.989657	0.90125	0.15
GstD7	OreR_10mM_females_N3_W1	29.62		2.645	6.25496	0.965936	6.47554	2.695	6.43081	6.4313	0.0217945	0.0125831
GstD7	OreR_10mM_females_N3_W2	29.64		2.625	6.16884	0.976032	6.32033	2.66
GstD7	OreR_10mM_females_N3_W3	29.57		2.695	6.47554	0.99654	6.49802	2.7

## Sheet: OreR_Fad2_females
1 Target	2 Sample	3 Mean Cq	4 Control group Avg Cq per Target	5 DCq per sample per Target (Col. 4-Col 3)	6 Relative quantity (RQ) 2^DCq	7 Norm. factor GEOMEAN [RQ(HRPT+Actin)]	8 Normalized expression per sample (A)	9 Log2 Normalized expression (B)	10 Bio group expression (C)	11 Log2(C) (D)	12 Standard deviation (SD) of (B) (E)	13 Standard error of the mean (SEM) (F)
Rp49	OreR_0mM_females_N1_W1	21.18	20.92	-0.26	0.835088
Rp49	OreR_0mM_females_N1_W2	20.75		0.17	1.12506
Rp49	OreR_0mM_females_N1_W3	20.83		0.09	1.06437
Rp49	OreR_10mM_females_N1_W1	20.93		-0.01	0.993092
Rp49	OreR_10mM_females_N1_W2	20.82		0.1	1.07177
Rp49	OreR_10mM_females_N1_W3	20.94		-0.02	0.986233
Act5C	OreR_0mM_females_N1_W1	22.49	22.4767	-0.0133333	0.990801
Act5C	OreR_0mM_females_N1_W2	22.42		0.0566667	1.04006
Act5C	OreR_0mM_females_N1_W3	22.52		-0.0433333	0.97041
Act5C	OreR_10mM_females_N1_W1	22.67		-0.193333	0.874583
Act5C	OreR_10mM_females_N1_W2	22.68		-0.203333	0.868541
Act5C	OreR_10mM_females_N1_W3	23.12		-0.643333	0.640232
Fad2	OreR_0mM_females_N1_W1	26.01	26.265	0.255	1.19334	0.909618	1.31191	0.391667	0.881684	0.442778	0.109358	0.0631381
Fad2	OreR_0mM_females_N1_W2	26.52		-0.255	0.837987	1.08172	0.774677	0.368333
Fad2	OreR_0mM_females_N1_W3	26.81		-0.545	0.685391	1.0163	0.674395	0.568333
Fad2	OreR_10mM_females_N1_W1	24.92		1.345	2.5403	0.931956	2.72578	1.44667	2.45094	2.45858	0.138684	0.0800694
Fad2	OreR_10mM_females_N1_W2	25.06		1.205	2.30537	0.964821	2.38943	1.25667
Fad2	OreR_10mM_females_N1_W3	25.42		0.845	1.79626	0.794618	2.26054	1.17667
Rp49	OreR_0mM_females_N2_W1	20.66	20.6467	-0.0133333	0.990801
Rp49	OreR_0mM_females_N2_W2	20.62		0.0266667	1.01866
Rp49	OreR_0mM_females_N2_W3	20.66		-0.0133333	0.990801
Rp49	OreR_10mM_females_N2_W1	20.71		-0.0633333	0.95705
Rp49	OreR_10mM_females_N2_W2	21.07		-0.423333	0.7457
Rp49	OreR_10mM_females_N2_W3	20.85		-0.203333	0.868541
Act5C	OreR_0mM_females_N2_W1	23.49	23.1333	-0.356667	0.780967
Act5C	OreR_0mM_females_N2_W2	23.61		-0.476667	0.718636
Act5C	OreR_0mM_females_N2_W3	22.3		0.833333	1.7818
Act5C	OreR_10mM_females_N2_W1	23.71		-0.576667	0.670511
Act5C	OreR_10mM_females_N2_W2	24.26		-1.12667	0.457973
Act5C	OreR_10mM_females_N2_W3	22.95		0.183333	1.1355
Fad2	OreR_0mM_females_N2_W1	26.57	26.47	-0.1	0.933033	0.879649	1.06069	0.085	1.04488	0.21	0.120312	0.0694622
Fad2	OreR_0mM_females_N2_W2	26.37		0.1	1.07177	0.855595	1.25266	0.325
Fad2	OreR_0mM_females_N2_W3	26.28		0.19	1.14076	1.32869	0.858565	0.22
Fad2	OreR_10mM_females_N2_W1	25.59		0.88	1.84038	0.80107	2.2974	1.2	2.69758	2.76496	0.384068	0.221742
Fad2	OreR_10mM_females_N2_W2	25.37		1.1	2.14355	0.584389	3.66802	1.875
Fad2	OreR_10mM_females_N2_W3	25.26		1.21	2.31338	0.993092	2.32947	1.22
Rp49	OreR_0mM_females_N3_W1	20.87	20.8433	-0.0266667	0.981686
Rp49	OreR_0mM_females_N3_W2	20.84		0.00333333	1.00231
Rp49	OreR_0mM_females_N3_W3	20.82		0.0233333	1.0163
Rp49	OreR_10mM_females_N3_W1	21.97		-1.12667	0.457973
Rp49	OreR_10mM_females_N3_W2	20.96		-0.116667	0.922316
Rp49	OreR_10mM_females_N3_W3	21.04		-0.196667	0.872564
Act5C	OreR_0mM_females_N3_W1	22.63	22.52	-0.11	0.926588
Act5C	OreR_0mM_females_N3_W2	22.45		0.07	1.04972
Act5C	OreR_0mM_females_N3_W3	22.48		0.04	1.02811
Act5C	OreR_10mM_females_N3_W1	23.22		-0.7	0.615572
Act5C	OreR_10mM_females_N3_W2	22.72		-0.2	0.870551
Act5C	OreR_10mM_females_N3_W3	22.67		-0.15	0.90125
Fad2	OreR_0mM_females_N3_W1	26.04	26.04	0	1	0.953739	1.0485	0.0683333	1.05214	0.0977778	0.0800058	0.0461914
Fad2	OreR_0mM_females_N3_W2	26.04		0	1	1.02574	0.974905	0.0366667
Fad2	OreR_0mM_females_N3_W3	25.82		0.22	1.16473	1.02219	1.13945	0.188333
Fad2	OreR_10mM_females_N3_W1	24.9		1.14	2.20381	0.530957	4.15064	2.05333	2.8317	2.94602	0.48663	0.280956
Fad2	OreR_10mM_females_N3_W2	24.88		1.16	2.23457	0.89606	2.49378	1.31833
Fad2	OreR_10mM_females_N3_W3	25.08		0.96	1.94531	0.886791	2.19365	1.13333

## Sheet: OreR_mag_females
1 Target	2 Sample	3 Mean Cq	4 Control group Avg Cq per Target	5 DCq per sample per Target (Col. 4-Col 3)	6 Relative quantity (RQ) 2^DCq	7 Norm. factor GEOMEAN [RQ(HRPT+Actin)]	8 Normalized expression per sample (A)	9 Log2 Normalized expression (B)	10 Bio group expression (C)	11 Log2(C) (D)	12 Standard deviation (SD) of (B) (E)	13 Standard error of the mean (SEM) (F)
Rp49	OreR_0mM_females_N1_W1	21.18	20.92	-0.26	0.835088
Rp49	OreR_0mM_females_N1_W2	20.75		0.17	1.12506
Rp49	OreR_0mM_females_N1_W3	20.83		0.09	1.06437
Rp49	OreR_10mM_females_N1_W1	20.93		-0.01	0.993092
Rp49	OreR_10mM_females_N1_W2	20.82		0.1	1.07177
Rp49	OreR_10mM_females_N1_W3	20.94		-0.02	0.986233
Act5C	OreR_0mM_females_N1_W1	22.49	22.4767	-0.0133333	0.990801
Act5C	OreR_0mM_females_N1_W2	22.42		0.0566667	1.04006
Act5C	OreR_0mM_females_N1_W3	22.52		-0.0433333	0.97041
Act5C	OreR_10mM_females_N1_W1	22.67		-0.193333	0.874583
Act5C	OreR_10mM_females_N1_W2	22.68		-0.203333	0.868541
Act5C	OreR_10mM_females_N1_W3	23.12		-0.643333	0.640232
mag	OreR_0mM_females_N1_W1	28.74	28.74	0	1	0.909618	1.09936	0.136667	0.974905	0.127778	0.0126198	0.00728604
mag	OreR_0mM_females_N1_W2	28.74		0	1	1.08172	0.92445	0.113333
mag	OreR_0mM_females_N1_W3	28.85		-0.11	0.926588	1.0163	0.911722	0.133333
mag	OreR_10mM_females_N1_W1	31.63		-2.89	0.134904	0.931956	0.144753	2.78833	0.138536	0.139805	0.241316	0.139324
mag	OreR_10mM_females_N1_W2	31.91		-3.17	0.111105	0.964821	0.115156	3.11833
mag	OreR_10mM_females_N1_W3	31.72		-2.98	0.126745	0.794618	0.159504	2.64833
Rp49	OreR_0mM_females_N2_W1	20.66	20.6467	-0.0133333	0.990801
Rp49	OreR_0mM_females_N2_W2	20.62		0.0266667	1.01866
Rp49	OreR_0mM_females_N2_W3	20.66		-0.0133333	0.990801
Rp49	OreR_10mM_females_N2_W1	20.71		-0.0633333	0.95705
Rp49	OreR_10mM_females_N2_W2	21.07		-0.423333	0.7457
Rp49	OreR_10mM_females_N2_W3	20.85		-0.203333	0.868541
Act5C	OreR_0mM_females_N2_W1	23.49	23.1333	-0.356667	0.780967
Act5C	OreR_0mM_females_N2_W2	23.61		-0.476667	0.718636
Act5C	OreR_0mM_females_N2_W3	22.3		0.833333	1.7818
Act5C	OreR_10mM_females_N2_W1	23.71		-0.576667	0.670511
Act5C	OreR_10mM_females_N2_W2	24.26		-1.12667	0.457973
Act5C	OreR_10mM_females_N2_W3	22.95		0.183333	1.1355
mag	OreR_0mM_females_N2_W1	28.34	28.27	-0.07	0.952638	0.879649	1.08298	0.115	1.05214	0.2	0.0904157	0.0522015
mag	OreR_0mM_females_N2_W2	28.2		0.07	1.04972	0.855595	1.22688	0.295
mag	OreR_0mM_females_N2_W3	28.05		0.22	1.16473	1.32869	0.876606	0.19
mag	OreR_10mM_females_N2_W1	30.52		-2.25	0.210224	0.80107	0.262429	1.93	0.29152	0.296113	0.307015	0.177255
mag	OreR_10mM_females_N2_W2	30.47		-2.2	0.217638	0.584389	0.372419	1.425
mag	OreR_10mM_females_N2_W3	30.26		-1.99	0.251739	0.993092	0.25349	1.98
Rp49	OreR_0mM_females_N3_W1	20.87	20.8433	-0.0266667	0.981686
Rp49	OreR_0mM_females_N3_W2	20.84		0.00333333	1.00231
Rp49	OreR_0mM_females_N3_W3	20.82		0.0233333	1.0163
Rp49	OreR_10mM_females_N3_W1	21.97		-1.12667	0.457973
Rp49	OreR_10mM_females_N3_W2	20.96		-0.116667	0.922316
Rp49	OreR_10mM_females_N3_W3	21.04		-0.196667	0.872564
Act5C	OreR_0mM_females_N3_W1	22.63	22.52	-0.11	0.926588
Act5C	OreR_0mM_females_N3_W2	22.45		0.07	1.04972
Act5C	OreR_0mM_females_N3_W3	22.48		0.04	1.02811
Act5C	OreR_10mM_females_N3_W1	23.22		-0.7	0.615572
Act5C	OreR_10mM_females_N3_W2	22.72		-0.2	0.870551
Act5C	OreR_10mM_females_N3_W3	22.67		-0.15	0.90125
mag	OreR_0mM_females_N3_W1	28.55	28.415	-0.135	0.91067	0.953739	0.954842	0.0666667	0.958157	0.127222	0.0790628	0.0456469
mag	OreR_0mM_females_N3_W2	28.28		0.135	1.09809	1.02574	1.07054	0.0983333
mag	OreR_0mM_females_N3_W3	28.6		-0.185	0.879649	1.02219	0.860551	0.216667
mag	OreR_10mM_females_N3_W1	31.42		-3.005	0.124568	0.530957	0.234609	2.09167	0.181327	0.184548	0.326126	0.188289
mag	OreR_10mM_females_N3_W2	31.17		-2.755	0.148137	0.89606	0.16532	2.59667
mag	OreR_10mM_females_N3_W3	31.29		-2.875	0.136313	0.886791	0.153715	2.70167

## Sheet: VK_GstE3_males
1 Target	2 Sample	3 Mean Cq	4 Control group Avg Cq per Target	5 DCq per sample per Target (Col. 4-Col 3)	6 Relative quantity (RQ) 2^DCq	7 Norm. factor GEOMEAN [RQ(HRPT+Actin)]	8 Normalized expression per sample (A)	9 Log2 Normalized expression (B)	10 Bio group expression (C)	11 Log2(C) (D)	12 Standard deviation (SD) of (B) (E)	13 Standard error of the mean (SEM) (F)
Rp49	VK_0mM_males_N1_W1	22.86	22.7933	-0.0666667	0.954842
Rp49	VK_0mM_males_N1_W2	22.91		-0.116667	0.922316
Rp49	VK_0mM_males_N1_W3	22.61		0.183333	1.1355
Rp49	VK_10mM_males_N1_W1	22.47		0.323333	1.25122
Rp49	VK_10mM_males_N1_W2	22.19		0.603333	1.51922
Rp49	VK_10mM_males_N1_W3	21.99		0.803333	1.74513
Act5C	VK_0mM_males_N1_W1	24.87	24.9467	0.0766667	1.05458
Act5C	VK_0mM_males_N1_W2	24.71		0.236667	1.17827
Act5C	VK_0mM_males_N1_W3	25.26		-0.313333	0.80478
Act5C	VK_10mM_males_N1_W1	23.74		1.20667	2.30804
Act5C	VK_10mM_males_N1_W2	23.79		1.15667	2.22942
Act5C	VK_10mM_males_N1_W3	23.79		1.15667	2.22942
GstE3	VK_0mM_males_N1_W1	26.35	26.32	-0.03	0.97942	1.00347	0.976032	0.035	1.15936	0.256667	0.388276	0.224171
GstE3	VK_0mM_males_N1_W2	26.29		0.03	1.02101	1.04247	0.97942	0.03
GstE3	VK_0mM_males_N1_W3	25.68		0.64	1.55833	0.955945	1.63014	0.705
GstE3	VK_10mM_males_N1_W1	24.22		2.1	4.28709	1.69937	2.52275	1.335	2.4312	2.43281	0.0644851	0.0372305
GstE3	VK_10mM_males_N1_W2	24.23		2.09	4.25748	1.84038	2.31338	1.21
GstE3	VK_10mM_males_N1_W3	24.04		2.28	4.85678	1.97247	2.46229	1.3
Rp49	VK_0mM_males_N2_W1	22.75	22.7233	-0.0266667	0.981686
Rp49	VK_0mM_males_N2_W2	22.7		0.0233333	1.0163
Rp49	VK_0mM_males_N2_W3	22.72		0.00333333	1.00231
Rp49	VK_10mM_males_N2_W1	22.37		0.353333	1.27751
Rp49	VK_10mM_males_N2_W2	22.5		0.223333	1.16743
Rp49	VK_10mM_males_N2_W3	22.32		0.403333	1.32256
Act5C	VK_0mM_males_N2_W1	24.7	24.85	0.15	1.10957
Act5C	VK_0mM_males_N2_W2	24.66		0.19	1.14076
Act5C	VK_0mM_males_N2_W3	25.19		-0.34	0.790041
Act5C	VK_10mM_males_N2_W1	23.22		1.63	3.09513
Act5C	VK_10mM_males_N2_W2	22.67		2.18	4.53154
Act5C	VK_10mM_males_N2_W3	23.82		1.03	2.04202
GstE3	VK_0mM_males_N2_W1	25.5	25.53	0.03	1.02101	1.04367	0.978289	0.0316667	0.909618	0.136667	0.105	0.0606218
GstE3	VK_0mM_males_N2_W2	25.56		-0.03	0.97942	1.07674	0.909618	0.136667
GstE3	VK_0mM_males_N2_W3	25.94		-0.41	0.752623	0.88987	0.845768	0.241667
GstE3	VK_10mM_males_N2_W1	23.14		2.39	5.24157	1.98848	2.63597	1.39833	2.63902	2.65815	0.212505	0.12269
GstE3	VK_10mM_males_N2_W2	23.14		2.39	5.24157	2.30005	2.27889	1.18833
GstE3	VK_10mM_males_N2_W3	23.2		2.33	5.02805	1.64338	3.05958	1.61333
Rp49	VK_0mM_males_N3_W1	21.98	22.32	0.34	1.26576
Rp49	VK_0mM_males_N3_W2	22.41		-0.09	0.939523
Rp49	VK_0mM_males_N3_W3	22.57		-0.25	0.840896
Rp49	VK_10mM_males_N3_W1	21.89		0.43	1.34723
Rp49	VK_10mM_males_N3_W2	22.33		-0.01	0.993092
Rp49	VK_10mM_males_N3_W3	22.53		-0.21	0.864537
Act5C	VK_0mM_males_N3_W1	24.25	24.4267	0.176667	1.13027
Act5C	VK_0mM_males_N3_W2	24.27		0.156667	1.11471
Act5C	VK_0mM_males_N3_W3	24.76		-0.333333	0.793701
Act5C	VK_10mM_males_N3_W1	23.27		1.15667	2.22942
Act5C	VK_10mM_males_N3_W2	23.37		1.05667	2.08012
Act5C	VK_10mM_males_N3_W3	23.3		1.12667	2.18354
GstE3	VK_0mM_males_N3_W1	25.47	25.51	0.04	1.02811	1.1961	0.859558	0.218333	1.03049	0.237778	0.174979	0.101024
GstE3	VK_0mM_males_N3_W2	25.55		-0.04	0.972655	1.02337	0.950439	0.0733333
GstE3	VK_0mM_males_N3_W3	25.38		0.13	1.09429	0.816958	1.33947	0.421667
GstE3	VK_10mM_males_N3_W1	23.89		1.62	3.07375	1.73307	1.77358	0.826667	2.42559	2.48261	0.39212	0.226391
GstE3	VK_10mM_males_N3_W2	23.51		2	4	1.43727	2.78305	1.47667
GstE3	VK_10mM_males_N3_W3	23.52		1.99	3.97237	1.37395	2.8912	1.53167

## Sheet: VK_GstD7_males
1 Target	2 Sample	3 Mean Cq	4 Control group Avg Cq per Target	5 DCq per sample per Target (Col. 4-Col 3)	6 Relative quantity (RQ) 2^DCq	7 Norm. factor GEOMEAN [RQ(HRPT+Actin)]	8 Normalized expression per sample (A)	9 Log2 Normalized expression (B)	10 Bio group expression (C)	11 Log2(C) (D)	12 Standard deviation (SD) of (B) (E)	13 Standard error of the mean (SEM) (F)
Rp49	VK_0mM_males_N1_W1	22.86	22.7933	-0.0666667	0.954842
Rp49	VK_0mM_males_N1_W2	22.91		-0.116667	0.922316
Rp49	VK_0mM_males_N1_W3	22.61		0.183333	1.1355
Rp49	VK_10mM_males_N1_W1	22.47		0.323333	1.25122
Rp49	VK_10mM_males_N1_W2	22.19		0.603333	1.51922
Rp49	VK_10mM_males_N1_W3	21.99		0.803333	1.74513
Act5C	VK_0mM_males_N1_W1	24.87	24.9467	0.0766667	1.05458
Act5C	VK_0mM_males_N1_W2	24.71		0.236667	1.17827
Act5C	VK_0mM_males_N1_W3	25.26		-0.313333	0.80478
Act5C	VK_10mM_males_N1_W1	23.74		1.20667	2.30804
Act5C	VK_10mM_males_N1_W2	23.79		1.15667	2.22942
Act5C	VK_10mM_males_N1_W3	23.79		1.15667	2.22942
GstD7	VK_0mM_males_N1_W1	32.29	32.39	0.1	1.07177	1.00347	1.06807	0.095	1.03766	0.16	0.065	0.0375278
GstD7	VK_0mM_males_N1_W2	32.49		-0.1	0.933033	1.04247	0.895025	0.16
GstD7	VK_0mM_males_N1_W3	32.23		0.16	1.11729	0.955945	1.16878	0.225
GstD7	VK_10mM_males_N1_W1	28.86		3.53	11.5514	1.69937	6.79748	2.765	6.04189	6.06776	0.163018	0.0941187
GstD7	VK_10mM_males_N1_W2	29.07		3.32	9.98664	1.84038	5.42642	2.44
GstD7	VK_10mM_males_N1_W3	28.83		3.56	11.7942	1.97247	5.9794	2.58
Rp49	VK_0mM_males_N2_W1	22.75	22.7233	-0.0266667	0.981686
Rp49	VK_0mM_males_N2_W2	22.7		0.0233333	1.0163
Rp49	VK_0mM_males_N2_W3	22.72		0.00333333	1.00231
Rp49	VK_10mM_males_N2_W1	22.37		0.353333	1.27751
Rp49	VK_10mM_males_N2_W2	22.5		0.223333	1.16743
Rp49	VK_10mM_males_N2_W3	22.32		0.403333	1.32256
Act5C	VK_0mM_males_N2_W1	24.7	24.85	0.15	1.10957
Act5C	VK_0mM_males_N2_W2	24.66		0.19	1.14076
Act5C	VK_0mM_males_N2_W3	25.19		-0.34	0.790041
Act5C	VK_10mM_males_N2_W1	23.22		1.63	3.09513
Act5C	VK_10mM_males_N2_W2	22.67		2.18	4.53154
Act5C	VK_10mM_males_N2_W3	23.82		1.03	2.04202
GstD7	VK_0mM_males_N2_W1	31.8	31.705	-0.095	0.936272	1.04367	0.897095	0.156667	0.906471	0.141667	0.123187	0.071122
GstD7	VK_0mM_males_N2_W2	31.61		0.095	1.06807	1.07674	0.991946	0.0116667
GstD7	VK_0mM_males_N2_W3	32.13		-0.425	0.744839	0.88987	0.83702	0.256667
GstD7	VK_10mM_males_N2_W1	28.58		3.125	8.72406	1.98848	4.3873	2.13333	5.22344	5.72822	0.74031	0.427418
GstD7	VK_10mM_males_N2_W2	28.7		3.005	8.02777	2.30005	3.49026	1.80333
GstD7	VK_10mM_males_N2_W3	27.77		3.935	15.2951	1.64338	9.30711	3.21833
Rp49	VK_0mM_males_N3_W1	21.98	22.32	0.34	1.26576
Rp49	VK_0mM_males_N3_W2	22.41		-0.09	0.939523
Rp49	VK_0mM_males_N3_W3	22.57		-0.25	0.840896
Rp49	VK_10mM_males_N3_W1	21.89		0.43	1.34723
Rp49	VK_10mM_males_N3_W2	22.33		-0.01	0.993092
Rp49	VK_10mM_males_N3_W3	22.53		-0.21	0.864537
Act5C	VK_0mM_males_N3_W1	24.25	24.4267	0.176667	1.13027
Act5C	VK_0mM_males_N3_W2	24.27		0.156667	1.11471
Act5C	VK_0mM_males_N3_W3	24.76		-0.333333	0.793701
Act5C	VK_10mM_males_N3_W1	23.27		1.15667	2.22942
Act5C	VK_10mM_males_N3_W2	23.37		1.05667	2.08012
Act5C	VK_10mM_males_N3_W3	23.3		1.12667	2.18354
GstD7	VK_0mM_males_N3_W1	31.87	32.095	0.225	1.16878	1.1961	0.97716	0.0333333	1.00812	0.206111	0.153481	0.0886124
GstD7	VK_0mM_males_N3_W2	32.32		-0.225	0.855595	1.02337	0.836053	0.258333
GstD7	VK_0mM_males_N3_W3	32.06		0.035	1.02456	0.816958	1.25411	0.326667
GstD7	VK_10mM_males_N3_W1	28.91		3.185	9.09454	1.73307	5.24763	2.39167	5.55325	5.55794	0.0728583	0.0420648
GstD7	VK_10mM_males_N3_W2	29.04		3.055	8.31087	1.43727	5.78239	2.53167
GstD7	VK_10mM_males_N3_W3	29.14		2.955	7.75432	1.37395	5.6438	2.49667

[truncated: 15 more sheets: VK_Fad2_males, VK_mag_males, VK_GstE3_females, VK_GstD7_females, VK_Fad2_females, VK_mag_females, AGES_GstE3_males, AGES_GstD7_males, AGES_Fad2_males, AGES_mag_males, AGES_GstE3_females, AGES_GstD7_females, AGES_Fad2_females, AGES_mag_females, Stats]
