# Supplementary material for: Auxin exposure disrupts feeding behavior and fatty acid metabolism in adult Drosophila
Source: eLife. 2024 Jan 19;12:RP91953. doi: 10.7554/eLife.91953 (PMC10945601; doi:10.7554/eLife.91953)
Supplement: Figure 3—source data 1. [file elife-91953-fig3-data1.xlsx]

## Sheet: Sheet1
gene_id	VK_10_f_1	VK_10_f_2	VK_10_f_3	VK_0_f_1	VK_0_f_2	VK_0_f_3	VK_f_10	VK_f	log2FoldChange	pvalue	padj	gene_name	gene_chr	gene_start	gene_end	gene_strand	gene_length	gene_biotype	gene_description	tf_family	VK_10_f_1_count	VK_10_f_2_count	VK_10_f_3_count	VK_0_f_1_count	VK_0_f_2_count	VK_0_f_3_count	VK_10_f_1_fpkm	VK_10_f_2_fpkm	VK_10_f_3_fpkm	VK_0_f_1_fpkm	VK_0_f_2_fpkm	VK_0_f_3_fpkm
FBgn0000047	127.882	179.394	121.532	20.6258	82.7629	20.4838	142.936	41.2908	1.78922	4.06426e-05	0.000245416	Act88F	3R	15439969	15442177	+	1595	protein_coding	-	Actin	134	172	124	22	84	19	4.10753	5.57011	3.85405	0.68083	2.76534	0.689117
FBgn0000055	173.691	188.781	237.183	45.0017	39.4109	42.0457	199.885	42.1528	2.24479	1.17246e-17	5.69294e-16	Adh	2L	14615552	14618902	+	2254	protein_coding	-	adh_short	182	181	242	48	40	39	3.94779	4.14783	5.32253	1.05115	0.93183	1.00095
FBgn0000078	27680.8	33862.8	28432.5	5028.94	13496.3	10779.9	29992	9768.36	1.6184	2.08519e-05	0.000137833	Amy-d	2R	17124764	17126369	+	1606	protein_coding	-	-	29005	32467	29010	5364	13698	9999	883.007	1044.22	895.486	164.862	447.86	360.173
FBgn0000079	21051.9	25947.5	21553.2	5160.19	10322.7	7921.85	22850.9	7801.58	1.55044	3.49282e-15	1.17748e-13	Amy-p	2R	17118636	17120303	-	1668	protein_coding	-	-	22059	24878	21991	5504	10477	7348	646.587	770.399	653.59	162.877	329.816	254.843
FBgn0000303	104.978	176.265	112.711	60.9398	37.4404	33.421	131.318	43.9337	1.57322	2.16537e-06	1.80178e-05	Cha	3R	18705501	18732344	+	4011	protein_coding	-	-	110	169	115	65	38	31	1.34084	2.17636	1.42135	0.799903	0.497464	0.447104
FBgn0000442	25.7673	15.6448	22.5422	7.50028	5.91164	7.54667	21.3181	6.98619	1.61219	0.012478	0.0327247	Pkg21D	2L	786153	790798	-	2583	protein_coding	-	Pkinase	27	15	23	8	6	7	0.511065	0.29996	0.441428	0.152877	0.121971	0.156774
FBgn0000492	168.919	265.962	232.282	60.0022	61.0869	64.6857	222.388	61.9249	1.84433	3.24315e-13	8.42863e-12	Dr	3R	29556386	29565244	+	2552	protein_coding	-	Homeobox	177	255	237	64	62	60	3.39101	5.16126	4.60388	1.23787	1.27568	1.3601
FBgn0000535	249.084	377.562	309.71	152.818	76.8513	86.2476	312.119	105.306	1.56377	6.20347e-09	8.52092e-08	eag	X	14955477	15009989	+	10636	protein_coding	-	Ion_trans	261	362	316	163	78	80	1.19977	1.75803	1.47287	0.75646	0.385076	0.435122
FBgn0001112	176.554	208.598	141.134	58.1272	56.1605	40.9676	175.428	51.7518	1.75671	1.318e-10	2.38514e-09	Gld	3R	7252063	7265703	-	2899	protein_coding	-	-	185	200	144	62	57	38	3.12004	3.56351	2.46247	1.05565	1.03242	0.75829
FBgn0001134	62.0324	87.6111	52.9251	19.6882	26.6024	22.64	67.5229	22.9769	1.5546	6.63003e-05	0.000376276	Grd	3L	17823333	17839767	+	4071	protein_coding	-	Neur_chan_LBD	65	84	54	21	27	21	0.780637	1.0658	0.657581	0.254621	0.348252	0.298413
FBgn0001208	3607.42	4794.62	4003.68	1392.24	1404.01	1379.96	4135.24	1392.07	1.57059	6.74575e-32	1.28376e-29	Hn	3L	7760453	7763166	+	2115	protein_coding	-	-	3780	4597	4085	1485	1425	1280	87.3813	112.269	95.7499	34.6571	35.3781	35.0106
FBgn0002522	56.3063	76.1383	54.8853	15.9381	15.7644	25.8743	62.4433	19.1922	1.70803	3.07406e-05	0.000194377	lab	3R	6661427	6678590	-	3046	protein_coding	-	Homeobox	59	73	56	17	16	24	0.94702	1.23791	0.911412	0.275484	0.275817	0.455807
FBgn0002570	26357.1	30111.1	20330.1	4120.47	8135.4	5585.61	25599.4	5947.16	2.10586	2.62968e-24	2.61882e-22	Mal-A1	2R	8449664	8451904	-	1826	protein_coding	-	-	27618	28870	20743	4395	8257	5181	739.484	816.662	563.154	118.805	237.439	164.139
FBgn0002576	47.7172	27.1177	38.2237	12.188	12.8085	12.9371	37.6862	12.6445	1.57828	0.00152821	0.00560504	lz	X	9284649	9303636	+	3468	protein_coding	-	Runt	50	26	39	13	13	12	0.704901	0.387249	0.557496	0.185029	0.196832	0.200171
FBgn0003328	2361.05	3097.68	1939.61	792.217	803.982	702.918	2466.11	766.372	1.68568	2.6152e-23	2.35548e-21	scb	2R	15248784	15258498	+	5004	protein_coding	-	-	2474	2970	1979	845	816	652	24.1724	30.6574	19.6058	8.3352	8.56256	7.53755
FBgn0003961	4229.65	5465.27	4683.87	1101.6	1440.47	950.88	4792.93	1164.32	2.04106	1.40432e-35	3.45199e-33	Uro	2L	7780085	7781415	+	1262	protein_coding	-	-	4432	5240	4779	1175	1462	882	171.703	214.471	187.73	45.9574	60.8301	40.4305
FBgn0004057	2574.82	2615.82	2531.58	645.024	1015.82	931.474	2574.07	864.105	1.57532	3.53942e-22	2.82173e-20	Zw	X	19667252	19672353	+	2512	protein_coding	-	G6PD_C	2698	2508	2583	688	1031	864	52.5121	51.5708	50.9755	13.519	21.5511	19.8973
FBgn0004360	62.0324	105.342	62.726	24.3759	26.6024	19.4057	76.7001	23.4613	1.7041	1.05235e-05	7.44855e-05	Wnt2	2R	9494166	9503188	+	2240	protein_coding	-	wnt	65	101	64	26	27	18	1.41874	2.329	1.41641	0.57293	0.632916	0.464862
FBgn0005636	113.567	149.148	125.452	44.0641	42.3667	48.5143	129.389	44.9817	1.52471	5.3694e-08	6.24173e-07	nvy	2R	24275734	24291084	+	3502	protein_coding	-	zf-MYND	119	143	128	47	43	45	1.66138	2.10919	1.81197	0.662458	0.644738	0.743355
FBgn0005659	480.035	682.115	511.609	151.881	133.012	209.151	557.92	164.681	1.7623	1.06509e-16	4.62023e-15	Ets98B	3R	27736538	27748366	+	3522	protein_coding	-	Ets	503	654	522	162	135	194	6.98258	9.59146	7.34747	2.2704	2.01268	3.18649
FBgn0005660	137.426	204.426	153.875	19.6882	32.514	26.9524	165.242	26.3849	2.64882	3.19886e-17	1.49183e-15	Ets21C	2L	544925	552923	-	5407	protein_coding	-	Ets	144	196	157	21	33	25	1.3021	1.87239	1.43946	0.191708	0.320471	0.267475
FBgn0005664	417.048	525.667	233.262	82.5031	107.395	80.8572	391.993	90.2516	2.11783	1.43144e-14	4.54021e-13	Cry	2L	11944129	11947131	+	2261	protein_coding	-	Chitin_bind_4	437	504	238	88	109	75	9.4497	11.514	5.21835	1.92114	2.53138	1.91894
FBgn0010043	332.112	353.574	260.705	22.5008	38.4256	26.9524	315.463	29.2929	3.42964	3.30007e-37	9.73439e-35	GstD7	3R	12378500	12379255	+	756	protein_coding	-	GST_N	348	339	266	24	39	25	22.5058	23.1619	17.4428	1.56699	2.70878	1.91301
FBgn0010044	71.5758	94.9121	50.9649	10.3129	20.6907	16.1714	72.4843	15.725	2.20717	3.20747e-07	3.19636e-06	GstD8	3R	12380008	12380815	+	808	protein_coding	-	GST_N	75	91	52	11	21	15	4.53823	5.81737	3.19043	0.671982	1.3647	1.07394
FBgn0010241	3945.26	5306.73	3151	411.578	483.769	385.958	4134.33	427.102	3.27458	1.38489e-72	2.72338e-69	Mdr50	2R	14246966	14252597	+	4256	protein_coding	-	ABC_membrane	4134	5088	3215	439	491	358	47.4904	61.7507	37.4486	5.09143	6.05774	4.8661
FBgn0010395	461.903	599.719	415.56	187.507	143.85	131.528	492.394	154.295	1.67137	8.98326e-16	3.36487e-14	Itgbetanu	2L	21053033	21058044	+	3340	protein_coding	-	EGF_2	484	575	424	200	146	122	7.08494	8.89237	6.29326	2.9557	2.29529	2.11307
FBgn0010414	181.325	198.168	196.019	35.6263	44.3373	39.8895	191.837	39.951	2.26444	9.83524e-19	5.42271e-17	SerT	2R	24404595	24411074	-	3725	protein_coding	-	SNF	190	190	200	38	45	37	2.49382	2.63465	2.66171	0.50354	0.634332	0.574613
FBgn0010651	1849.52	2108.93	1856.3	717.214	667.029	570.312	1938.25	651.519	1.5719	4.3066e-30	7.25908e-28	l(2)08717	2R	18796975	18803727	-	3288	protein_coding	-	MFS_1	1938	2022	1894	765	677	529	28.8177	31.7648	28.5565	11.4843	10.8115	9.3073
FBgn0011283	180.371	300.381	198.959	38.4389	75.866	74.3886	226.57	62.8978	1.85185	5.59366e-10	9.1539e-09	Obp28a	2L	7496791	7497365	-	575	protein_coding	-	-	189	288	203	41	77	69	16.0706	25.8715	17.5019	3.51959	7.03159	6.94194
FBgn0011582	70.6215	100.127	90.1686	32.8137	17.7349	25.8743	86.9724	25.4743	1.76834	1.11375e-06	9.92536e-06	Dop1R1	3R	14165379	14214810	-	14565	protein_coding	-	7tm_1	74	96	92	35	18	24	0.248404	0.340453	0.313137	0.118614	0.0648922	0.0953236
FBgn0012034	13417.1	17062.3	13832.1	3919.83	4369.68	4781.35	14770.5	4356.96	1.76141	3.73055e-39	1.29461e-36	AcCoAS	3L	21270722	21280243	-	3605	protein_coding	-	AMP-binding	14059	16359	14113	4181	4435	4435	190.672	234.395	194.075	57.2468	64.598	71.1685
FBgn0013699	29.5847	25.0318	22.5422	8.43781	7.88218	2.15619	25.7195	6.15873	2.04658	0.0017525	0.00630803	mt:tRNA:L:UUR	dmel_mitochondrion_genome	3012	3077	+	66	tRNA	-	-	31	24	23	9	8	2	22.9644	18.7829	17.2759	6.73093	6.36468	1.75302
FBgn0013710	24.8129	30.2467	26.4625	13.1255	5.91164	7.54667	27.1741	8.86126	1.60884	0.00600028	0.017828	mt:tRNA:Y	dmel_mitochondrion_genome	1403	1468	-	66	tRNA	-	-	26	29	27	14	6	7	19.2605	22.6961	20.2804	10.4703	4.77351	6.13556
FBgn0013771	1797.98	2050.52	1496.6	216.571	178.334	142.309	1781.7	179.071	3.31152	7.39617e-76	1.74535e-72	Cyp6a9	2R	14879356	14881372	-	1964	protein_coding	-	p450	1884	1966	1527	231	181	132	46.9004	51.7057	38.5438	5.8056	4.83913	3.88805
FBgn0013812	91.617	213.813	146.034	45.0017	40.3962	45.28	150.488	43.5593	1.78721	7.259e-08	8.18042e-07	Dhc93AB	3R	21024580	21042499	-	14010	protein_coding	-	Dynein_heavy	96	205	149	48	41	42	0.33502	0.755809	0.527236	0.169114	0.153665	0.173425
FBgn0013813	19.0869	27.1177	23.5223	6.56274	9.85273	6.46857	23.2423	7.62801	1.60467	0.00944055	0.0261354	Dhc98D	3R	28486953	28519398	+	15919	protein_coding	-	Dynein_heavy	20	26	24	7	10	6	0.0614259	0.0843634	0.0747398	0.021705	0.0329849	0.021804
FBgn0014859	65.8498	124.116	84.2881	43.1266	31.5287	21.5619	91.4179	32.0724	1.50323	6.39082e-05	0.000364806	Hr38	2L	20683462	20714588	-	7704	protein_coding	-	zf-C4	69	119	86	46	32	20	0.437895	0.797861	0.553399	0.294726	0.218104	0.15018
FBgn0015037	957.207	1345.46	1226.1	418.14	346.816	244.728	1176.25	336.561	1.80326	9.29171e-20	5.89424e-18	Cyp4p1	2R	9240041	9242139	+	1680	protein_coding	-	p450	1003	1290	1251	446	352	227	29.1896	39.6622	36.9151	13.1039	11.0018	7.81657
FBgn0015519	79.2106	106.385	114.671	39.3765	26.6024	22.64	100.089	29.5396	1.75372	3.63143e-07	3.57358e-06	nAChRalpha3	X	8276200	8367169	-	10506	protein_coding	-	Neur_chan_LBD	83	102	117	42	27	21	0.386258	0.501486	0.552084	0.197328	0.134945	0.115633
FBgn0015561	14.3152	41.7196	38.2237	6.56274	7.88218	11.859	31.4195	8.76799	1.84686	0.00263251	0.00888726	unpg	2R	9195205	9199870	+	1690	protein_coding	-	Homeobox	15	40	39	7	8	11	0.433952	1.22256	1.14402	0.20445	0.248562	0.376535
FBgn0016920	95.4344	111.6	126.432	36.5639	40.3962	23.7181	111.155	33.5594	1.72231	8.22676e-08	9.20071e-07	nompC	2L	5346237	5365760	+	7579	protein_coding	-	Ion_trans	100	107	129	39	41	22	0.645097	0.729236	0.84379	0.253997	0.284055	0.167923
FBgn0020414	2861.12	3624.39	3067.69	814.718	932.068	727.714	3184.4	824.833	1.94834	1.22251e-41	5.15158e-39	Idgf3	2L	16450907	16455194	+	3954	protein_coding	-	-	2998	3475	3130	869	946	675	37.0708	45.3957	39.2432	10.8483	12.5628	9.87568
FBgn0020416	1052.64	1434.11	1239.82	413.453	440.417	367.631	1242.19	407.167	1.60828	2.64123e-24	2.61882e-22	Idgf1	2L	16445278	16446793	+	1445	protein_coding	-	-	1103	1375	1265	441	447	341	37.3203	49.1509	43.399	15.0642	16.2432	13.6517
FBgn0020506	206.138	208.598	157.795	17.8132	90.6451	38.8114	190.844	49.0899	1.95973	8.90251e-07	8.09265e-06	Amyrel	2R	16651095	16652699	-	1549	protein_coding	-	-	216	200	161	19	92	36	6.81772	6.66922	5.15265	0.605451	3.11865	1.34447
FBgn0020765	88.754	50.0635	39.2038	16.8756	11.8233	18.3276	59.3404	15.6755	1.92388	3.46503e-05	0.000214726	Acp65Aa	3L	6152050	6152745	-	615	protein_coding	-	Chitin_bind_4	93	48	40	18	12	17	7.39341	4.03146	3.22434	1.44469	1.02456	1.59909
FBgn0020880	58.215	61.5364	42.144	10.3129	4.92636	4.31238	53.9651	6.51721	3.03339	1.24245e-08	1.60918e-07	CG7179	2L	7775804	7778029	-	2226	protein_coding	-	CUB	61	59	43	11	5	4	1.33981	1.36906	0.957635	0.243918	0.117944	0.103952
FBgn0022700	1068.87	1332.94	894.826	80.628	233.51	139.074	1098.88	151.071	2.863	6.79984e-10	1.09456e-08	Cht4	2R	21065379	21067087	-	1473	protein_coding	-	CBM_14	1120	1278	913	86	237	129	37.1751	44.8151	30.7273	2.88186	8.44843	5.06625
FBgn0023023	1114.67	1583.26	1300.58	510.019	439.432	410.754	1332.84	453.402	1.55457	4.03591e-21	2.90364e-19	CRMP	3R	5571108	5579189	+	2814	protein_coding	-	Amidohydro_1	1168	1518	1327	544	446	381	20.2934	27.864	23.3778	9.54226	8.32226	7.8325
FBgn0023495	107.841	140.804	105.85	10.3129	7.88218	8.62476	118.165	8.93994	3.72011	4.89142e-20	3.18861e-18	Lip3	3R	13370240	13371904	-	1434	protein_coding	-	-	113	135	108	11	8	8	3.85271	4.86274	3.73363	0.378634	0.292935	0.322731
FBgn0023535	664.224	881.326	827.199	84.3781	177.349	126.137	790.916	129.288	2.61406	2.84008e-30	4.85653e-28	arg	X	509435	528028	+	1243	protein_coding	-	-	696	845	844	90	180	117	27.3763	35.1141	33.6611	3.57395	7.60382	5.44521
FBgn0024184	68.7128	62.5794	65.6663	10.3129	15.7644	8.62476	65.6528	11.5673	2.50088	8.37221e-09	1.12e-07	unc-4	X	17768569	17778708	+	2999	protein_coding	-	Homeobox	72	60	67	11	16	8	1.1738	1.03341	1.10753	0.181048	0.280139	0.154317
FBgn0024288	51.5346	50.0635	37.2436	11.2504	28.5729	6.46857	46.2806	15.4306	1.57893	0.00272476	0.009162	Sox100B	3R	31065253	31083407	+	2049	protein_coding	-	HMG_box	54	48	38	12	29	6	1.28851	1.21003	0.919387	0.289079	0.743167	0.169398
FBgn0024361	1406.7	1757.44	1170.23	302.824	522.194	320.194	1444.79	381.737	1.91987	1.15345e-19	7.23911e-18	Tsp2A	X	1346553	1348143	+	1037	protein_coding	-	Tetraspannin	1474	1685	1194	323	530	297	69.4954	83.93	57.0798	15.3745	26.8366	16.5683
FBgn0024977	16.2239	29.2037	18.6218	6.56274	6.89691	7.54667	21.3498	7.00211	1.60776	0.0133992	0.0346933	CG2709	X	2726678	2727568	+	827	protein_coding	-	-	17	28	19	7	7	7	1.00503	1.74884	1.13895	0.417801	0.44445	0.489657
FBgn0025687	938.12	1177.54	1092.8	347.825	334.007	250.118	1069.49	310.65	1.78163	3.15415e-26	3.83668e-24	LKR	2L	7791175	7795959	-	3495	protein_coding	-	Saccharop_dh	983	1129	1115	371	339	232	13.7513	16.6856	15.8155	5.23966	5.09311	3.84008
FBgn0026268	272.942	357.746	280.307	60.0022	101.483	85.1695	303.665	82.2183	1.88646	3.12616e-15	1.05689e-13	antdh	X	11168030	11169058	-	950	protein_coding	-	adh_short	286	343	286	64	103	79	14.719	18.6495	14.9245	3.32532	5.69304	4.81064
FBgn0026385	6.68041	8.34392	4.90047	0	0.985273	0	6.6416	0.328424	4.2133	0.0106675	0.0288486	Or47b	2R	11319710	11321312	-	1239	protein_coding	-	-	7	8	5	0	1	0	0.276226	0.333515	0.200058	0	0.0423798	0
FBgn0026403	1093.68	1441.41	1276.08	424.703	423.667	387.036	1270.39	411.802	1.62447	2.07586e-27	2.84803e-25	Ndg	2R	10313891	10322104	+	4816	protein_coding	-	EGF_CA	1146	1382	1302	453	430	359	11.6342	14.8224	13.4024	4.64289	4.68827	4.31229
FBgn0026756	95.4344	113.686	64.6862	2.8126	14.7791	9.70286	91.2688	9.09818	3.33578	3.64661e-12	8.38721e-11	Ugt37a1	2L	20372409	20374083	-	1623	protein_coding	-	UDPGT	100	109	66	3	15	9	3.01244	3.469	2.01596	0.0912387	0.485292	0.320792
FBgn0027621	2801	3872.62	3049.07	878.47	1172.47	1266.76	3240.9	1105.9	1.55154	2.53672e-20	1.70061e-18	Pfrx	X	19495505	19509350	+	4250	protein_coding	-	-	2935	3713	3111	937	1190	1175	33.7642	45.1266	36.2884	10.8825	14.7024	15.9937
FBgn0028381	988.701	1281.83	782.115	268.135	387.212	306.179	1017.55	320.509	1.66656	9.73308e-17	4.25336e-15	Decay	3R	16499058	16501050	-	1111	protein_coding	-	Peptidase_C14	1036	1229	798	286	393	284	45.5914	57.1392	35.6078	12.7066	18.5742	14.7878
FBgn0028519	1927.78	2594.96	2096.42	71.2526	127.1	84.0914	2206.39	94.1481	4.55081	4.85934e-116	1.43338e-112	CG4500	2L	14027001	14029368	+	2206	protein_coding	-	AMP-binding	2020	2488	2139	76	129	78	44.7696	58.2561	48.0686	1.70053	3.07054	2.04545
FBgn0028562	129.791	156.448	117.611	49.6893	56.1605	26.9524	134.617	44.2674	1.59816	3.28089e-07	3.25852e-06	sut2	2R	8087396	8089297	+	1608	protein_coding	-	Sugar_tr	136	150	120	53	57	25	4.13514	4.81839	3.69957	1.62692	1.86131	0.899402
FBgn0028853	110.704	96.9981	99.9696	8.43781	20.6907	11.859	102.557	13.6625	2.91022	1.0469e-13	2.96219e-12	CG15263	2L	15285000	15286047	+	1048	protein_coding	-	-	116	93	102	9	21	11	5.4117	4.58372	4.82498	0.423895	1.05218	0.607199
FBgn0029507	2194.99	2878.65	2033.7	583.147	871.966	628.53	2369.11	694.547	1.77003	1.05665e-22	8.71845e-21	Tsp42Ed	2R	7009498	7011739	-	1248	protein_coding	-	Tetraspannin	2300	2760	2075	622	885	583	90.1053	114.233	82.4252	24.601	37.2357	27.0243
FBgn0029766	4231.56	5587.3	3329.38	1079.1	2106.51	1195.61	4382.75	1460.41	1.58543	4.07254e-05	0.000245664	CG15784	X	5429571	5432526	+	2956	protein_coding	-	-	4434	5357	3397	1151	2138	1109	73.3379	93.6081	56.9702	19.2197	37.9782	21.7034
FBgn0029769	1103.22	1200.48	1235.9	456.579	330.066	357.928	1179.87	381.524	1.62768	3.41167e-25	3.69306e-23	frma	X	5493014	5496052	-	2975	protein_coding	-	-	1156	1151	1261	487	335	332	18.998	19.9841	21.0128	8.08013	5.91274	6.45581
FBgn0029791	193.732	193.996	156.815	51.5644	45.3225	54.9829	181.514	50.6233	1.84326	4.29311e-13	1.10599e-11	CG4096	X	5698557	5708633	+	3992	protein_coding	-	TSP_1	203	186	160	55	46	51	2.48624	2.40668	1.98695	0.680062	0.605059	0.73906
FBgn0029826	264.353	380.691	237.183	65.6274	91.6303	87.3257	294.076	81.5278	1.85189	8.85103e-14	2.52865e-12	CG6041	X	5948160	5950208	+	1109	protein_coding	-	Trypsin	277	365	242	70	93	81	12.212	17.0003	10.8178	3.11561	4.40334	4.22526
FBgn0029898	628.913	863.596	596.877	152.818	159.614	126.137	696.462	146.19	2.25011	1.00771e-30	1.80151e-28	CG14439	X	6747544	6755752	+	2428	protein_coding	-	MFS_1	659	828	609	163	162	117	13.2701	17.6148	12.4344	3.31372	3.50346	2.78764
FBgn0030073	240.495	516.28	260.705	50.6269	127.1	74.3886	339.16	84.0385	2.01267	1.48302e-09	2.26367e-08	CG10962	X	8972908	8974255	-	1074	protein_coding	-	adh_short	252	495	266	54	129	69	11.4718	23.8066	12.2782	2.4818	6.3069	3.71659
FBgn0030272	520.118	612.235	462.604	118.129	125.13	148.777	531.652	130.679	2.02629	9.32181e-27	1.19552e-24	CG15201	X	11144120	11144809	+	489	protein_coding	-	-	545	587	472	126	127	138	54.491	62.0048	47.8509	12.7186	13.6372	16.3256
FBgn0030300	336.884	424.497	270.506	90.0033	120.203	92.7162	343.962	100.974	1.7674	1.52214e-14	4.81493e-13	Sk1	X	11442539	11446012	+	2852	protein_coding	-	-	353	407	276	96	122	86	6.05149	7.37125	4.79751	1.66149	2.24616	1.74441
FBgn0030310	234.769	327.499	225.422	87.1907	100.498	77.6229	262.563	88.4371	1.56771	2.71627e-11	5.45985e-10	PGRP-SA	X	11561643	11562779	+	1018	protein_coding	-	-	246	314	230	93	102	72	11.8147	15.9323	11.2005	4.50933	5.26118	4.09152
FBgn0030332	429.455	494.377	500.828	106.879	131.041	104.575	474.887	114.165	2.05555	3.0403e-28	4.4287e-26	CG9360	X	11763474	11764590	-	1035	protein_coding	-	adh_short	450	474	511	114	133	97	21.2574	23.6556	24.4758	5.43677	6.74748	5.42165
FBgn0030347	1041.19	1350.67	892.866	123.755	240.406	175.73	1094.91	179.964	2.60573	2.11869e-31	3.84592e-29	CG15739	X	11873319	11875346	+	1529	protein_coding	-	-	1091	1295	911	132	244	163	34.8863	43.748	29.5371	4.26131	8.3794	6.16708
FBgn0030348	59.1693	70.9233	46.0644	11.2504	18.7202	8.62476	58.719	12.8651	2.18466	1.84508e-06	1.56058e-05	CG10352	X	11875306	11877168	-	1491	protein_coding	-	-	62	68	47	12	19	8	2.03306	2.35574	1.5627	0.397265	0.669124	0.310393
FBgn0030359	7.63475	28.1607	20.582	1.87507	1.97055	2.15619	18.7925	2.0006	3.23151	0.000496948	0.00214074	CG18130	X	11990118	11992768	-	2344	protein_coding	-	-	8	27	21	2	2	2	0.166867	0.59498	0.444138	0.0421162	0.0448026	0.0493597
FBgn0030482	2885.94	4229.32	3267.63	891.596	860.143	758.979	3460.96	836.906	2.04752	6.13891e-39	2.06951e-36	CG1673	X	13396899	13401224	+	2510	protein_coding	-	-	3024	4055	3334	951	873	704	58.904	83.4475	65.8489	18.7018	18.263	16.2255
FBgn0030558	1649.11	2261.2	1535.81	565.333	676.882	481.909	1815.37	574.708	1.65865	1.58698e-20	1.10146e-18	CG1461	X	14261223	14265379	+	2509	protein_coding	-	Aminotran_1_2	1728	2168	1567	603	687	447	33.6729	44.6329	30.9617	11.863	14.3776	10.3064
FBgn0030594	5931.25	6843.06	5256.24	1807.57	1905.52	1549.22	6010.18	1754.1	1.77638	1.31826e-37	3.98824e-35	CG9509	X	14906334	14909708	-	2980	protein_coding	-	-	6215	6561	5363	1928	1934	1437	101.968	113.723	89.2171	31.935	34.0777	27.8959
FBgn0030595	961.025	1232.81	976.174	316.887	351.742	282.461	1056.67	317.03	1.73575	7.44714e-27	9.65591e-25	CG14406	X	14909873	14910845	-	667	protein_coding	-	-	1007	1182	996	338	357	262	73.8143	91.5352	74.027	25.0131	28.1043	22.7235
FBgn0030824	37.2194	65.7084	26.4625	2.8126	0	6.46857	43.1301	3.09373	3.82962	1.96321e-07	2.04087e-06	CG5070	X	17203112	17203925	+	814	protein_coding	-	-	39	63	27	3	0	6	2.34249	3.99772	1.64436	0.181917	0	0.426409
FBgn0030881	10.4978	14.6019	6.86066	1.87507	0	3.23429	10.6534	1.70312	2.6626	0.01616	0.0403664	CG12985	X	17883718	17885238	+	1357	protein_coding	-	-	11	14	7	2	0	3	0.396324	0.532899	0.255726	0.072749	0	0.127891
FBgn0030913	99.2518	143.933	102.91	42.1891	41.3814	34.4991	115.365	39.3565	1.54782	4.41538e-07	4.27376e-06	CG6123	X	18322958	18356191	-	6236	protein_coding	-	-	104	138	105	45	42	32	0.815388	1.14306	0.834718	0.356191	0.35365	0.296854
FBgn0030927	83.0279	90.7401	110.751	19.6882	31.5287	33.421	94.8396	28.2126	1.75463	3.50209e-07	3.45206e-06	CG15046	X	18487450	18489620	-	1817	protein_coding	-	-	87	87	113	21	32	31	2.341	2.47321	3.08305	0.570481	0.924753	0.986976
FBgn0030929	4703.96	5571.65	4787.76	1200.98	2660.24	1102.89	5021.12	1654.7	1.60139	0.000328445	0.00151203	CG15043	X	18493193	18494168	-	903	protein_coding	-	-	4929	5342	4885	1281	2700	1023	266.875	305.571	268.184	70.0226	157.003	65.5372
FBgn0030998	182.28	212.77	204.84	30.9386	81.7776	73.3105	199.963	62.0089	1.69329	3.391e-08	4.06578e-07	CG14195	X	19208694	19212082	-	2696	protein_coding	-	-	191	204	209	33	83	68	3.46378	3.90847	3.84311	0.604186	1.61655	1.45911
FBgn0030999	30971.3	40167.6	30361.4	5196.76	9809.37	7645.85	33833.4	7550.66	2.16381	5.39972e-29	8.72758e-27	Mur18B	X	19213254	19214938	+	1615	protein_coding	-	CBM_14	32453	38512	30978	5543	9956	7092	982.47	1231.74	950.906	169.414	323.7	254.036
FBgn0031033	95.4344	177.308	108.79	0	16.7496	2.15619	127.178	6.30194	4.33412	0.00146618	0.00541114	CG14219	X	19587348	19590170	-	2308	protein_coding	-	-	100	170	111	0	17	2	2.11837	3.8046	2.38421	0	0.386762	0.0501296
FBgn0031034	168.919	158.534	91.1487	7.50028	15.7644	3.23429	139.534	8.83297	3.96808	9.15445e-19	5.07105e-17	CG14205	X	19592609	19595548	+	2338	protein_coding	-	-	177	152	93	8	16	3	3.7014	3.35811	1.97195	0.168897	0.35934	0.0742295
FBgn0031089	1225.38	1490.43	1184.93	254.072	555.694	514.252	1300.25	441.339	1.55972	1.07497e-11	2.30191e-10	CG9572	X	20148124	20155514	+	1667	protein_coding	-	-	1284	1429	1209	271	564	477	37.6588	44.2785	35.954	8.02436	17.7654	16.5532
FBgn0031324	7.63475	3.12897	3.92038	0	0	0	4.8947	0	4.73814	0.0111905	0.029981	CG14342	2L	1204215	1205250	+	802	protein_coding	-	-	8	3	4	0	0	0	0.4877	0.193216	0.247253	0	0	0
FBgn0031412	27.676	41.7196	27.4426	7.50028	9.85273	5.39048	32.2794	7.58116	2.08286	0.000309842	0.00143591	CG16995	2L	2307948	2308872	+	721	protein_coding	-	SCP	29	40	28	8	10	5	1.96653	2.86564	1.92522	0.547686	0.728275	0.401176
FBgn0031473	67.7584	82.3962	92.1288	24.3759	29.5582	30.1867	80.7612	28.0403	1.52808	9.36048e-06	6.7303e-05	CG3104	2L	2848989	2855778	-	2799	protein_coding	-	-	71	79	94	26	30	28	1.2402	1.45788	1.66487	0.458508	0.562793	0.578702
FBgn0031520	494.35	654.998	484.166	88.1283	111.336	91.6381	544.505	97.0341	2.48777	6.73745e-35	1.55873e-32	CG8837	2L	3320245	3323141	+	1838	protein_coding	-	Sugar_tr	518	628	494	94	113	85	13.7791	17.6486	13.3241	2.5244	3.22822	2.6753
FBgn0031542	25.7673	34.4187	10.781	2.8126	8.86745	4.31238	23.6557	5.33081	2.14924	0.00348068	0.0112671	CG15414	2L	3480755	3491071	-	1402	protein_coding	-	-	27	33	11	3	9	4	0.94157	1.2158	0.388957	0.105621	0.337074	0.165049
FBgn0031562	236.677	322.284	198.959	75.9403	116.262	66.8419	252.64	86.3481	1.54662	8.90277e-09	1.18082e-07	CG3604	2L	3697242	3697872	-	631	protein_coding	-	Kunitz_BPTI	248	309	203	81	118	62	19.2158	25.2945	15.9486	6.33625	9.81936	5.6841
FBgn0031580	650.863	865.682	612.559	202.508	291.641	236.103	709.701	243.417	1.54373	1.44388e-15	5.24196e-14	CG15423	2L	4006041	4006606	+	566	protein_coding	-	-	682	830	625	216	296	219	58.9122	75.7457	54.7419	18.8371	27.4603	22.3835
FBgn0031697	67.7584	66.7514	48.0246	22.5008	10.838	16.1714	60.8448	16.5034	1.87847	1.27381e-05	8.87232e-05	CG14024	2L	5311311	5314895	-	2616	protein_coding	-	-	71	64	49	24	11	15	1.32696	1.26368	0.928571	0.452846	0.220793	0.331706
FBgn0031700	167.01	275.349	209.74	45.0017	55.1753	72.2324	217.367	57.4698	1.92286	3.80327e-12	8.69665e-11	CG14022	2L	5327975	5328879	-	652	protein_coding	-	-	175	264	214	48	56	67	13.1228	20.9147	16.2713	3.63388	4.50994	5.94466
FBgn0031753	16.2239	14.6019	5.88056	2.8126	1.97055	3.23429	12.2354	2.67248	2.19827	0.0195633	0.0472137	CG13999	2L	5955312	5956466	-	1041	protein_coding	-	-	17	14	6	3	2	3	0.798427	0.694662	0.285731	0.142248	0.100881	0.166713
FBgn0031801	5865.4	7454.25	6487.24	591.584	572.443	482.987	6602.3	549.005	3.58714	2.99596e-147	1.17831e-143	CG9498	2L	6349393	6351034	-	1514	protein_coding	-	-	6146	7147	6619	631	581	448	198.474	243.834	216.732	20.5722	20.1503	17.118
FBgn0031808	148.878	162.706	116.631	19.6882	26.6024	20.4838	142.738	22.2581	2.68017	6.83562e-17	3.04353e-15	CG9507	2L	6381266	6383419	+	2154	protein_coding	-	-	156	156	119	21	27	19	3.54092	3.74089	2.73878	0.481227	0.658186	0.510279
FBgn0031855	89.7084	107.428	100.95	38.4389	35.4698	26.9524	99.362	33.6204	1.5584	8.01081e-07	7.34418e-06	CG11221	2L	6742502	6756133	+	2722	protein_coding	-	Pkinase	94	103	103	41	36	25	1.68841	1.95454	1.87588	0.743485	0.694456	0.531314
FBgn0031918	61.078	87.6111	75.4672	37.5014	16.7496	17.2495	74.7188	23.8335	1.63954	5.49731e-05	0.000319363	CG6055	2L	7466543	7472493	+	1163	protein_coding	-	Lectin_C	64	84	77	40	17	16	2.69053	3.73075	3.28222	1.69768	0.767538	0.795866
FBgn0031945	54.3976	86.5682	66.6464	20.6258	23.6465	26.9524	69.2041	23.7416	1.54502	4.7965e-05	0.000283537	CG7191	2L	7767628	7775033	+	1643	protein_coding	-	-	57	83	68	22	24	25	1.69619	2.60938	2.05177	0.66094	0.767016	0.880242
FBgn0032109	67.7584	44.8486	6.86066	7.50028	13.7938	15.0933	39.8226	12.1291	1.72009	0.0107541	0.0290313	CG17005	2L	9327744	9330332	+	2234	protein_coding	-	-	71	43	7	8	14	14	1.55386	0.994218	0.155336	0.17676	0.32906	0.362531
FBgn0032139	113.567	155.405	117.611	44.0641	45.3225	34.4991	128.861	41.2952	1.63766	2.52089e-08	3.10804e-07	CG13116	2L	9729940	9730945	+	1006	protein_coding	-	-	119	149	120	47	46	32	5.78344	7.65041	5.91344	2.30609	2.40099	1.84014
FBgn0032281	57.2607	82.3962	55.8654	13.1255	34.4845	16.1714	65.1741	21.2605	1.61448	0.000229056	0.00110718	CG17107	2L	10681902	10682528	+	627	protein_coding	-	-	60	79	57	14	35	15	4.67865	6.50812	4.50675	1.10214	2.9311	1.38396
FBgn0032287	676.63	1002.31	797.797	280.323	321.199	272.758	825.58	291.427	1.50151	3.14398e-17	1.47206e-15	CG6415	2L	10703621	10704930	+	1254	protein_coding	-	GCV_T	709	961	814	299	326	253	27.643	39.5842	32.1798	11.7693	13.6506	11.6714
FBgn0032345	14.3152	26.0747	14.7014	4.68767	0.985273	7.54667	18.3638	4.40654	2.06926	0.00961619	0.0265221	CG14921	2L	11120642	11121714	-	953	protein_coding	-	-	15	25	15	5	1	7	0.769547	1.35501	0.780288	0.258973	0.0550982	0.424918
FBgn0032381	167.965	107.428	130.353	23.4384	24.6318	19.4057	135.248	22.492	2.58609	5.05306e-15	1.69378e-13	Mal-B1	2L	11847226	11849169	+	1814	protein_coding	-	-	176	103	133	25	25	18	4.74365	2.93289	3.63472	0.680267	0.723658	0.574031
FBgn0032435	880.86	1008.57	658.623	207.195	332.037	242.571	849.351	260.601	1.70451	2.07482e-16	8.52991e-15	Oatp33Eb	2L	12448484	12452047	+	2743	protein_coding	-	-	923	967	672	221	337	225	16.4518	18.2095	12.1451	3.97689	6.45111	4.74522
FBgn0032484	77.3019	80.3102	58.8056	20.6258	29.5582	20.4838	72.1392	23.5559	1.61328	1.57466e-05	0.000107272	kek4	2L	13212335	13215350	-	2703	protein_coding	-	-	81	77	60	22	30	19	1.46513	1.47143	1.10043	0.401748	0.582782	0.406637
FBgn0032495	25.7673	42.7626	29.4028	14.063	5.91164	14.0152	32.6442	11.33	1.52642	0.00569854	0.0170635	CG16820	2L	13246232	13250189	+	1574	protein_coding	-	-	27	41	30	15	6	13	0.83868	1.34547	0.944872	0.470395	0.20016	0.477791
FBgn0032549	10.4978	20.8598	8.82085	1.87507	0.985273	1.0781	13.3928	1.31281	3.33637	0.00202136	0.00711976	CG4650	2L	14773814	14774981	-	964	protein_coding	-	Trypsin	11	20	9	2	1	1	0.557895	1.07164	0.462831	0.102407	0.0544695	0.0600099
FBgn0032638	48.6716	84.4822	38.2237	20.6258	30.5434	6.46857	57.1258	19.2126	1.56282	0.00243488	0.00831044	SPH93	2L	17454263	17455923	-	1587	protein_coding	-	Trypsin	51	81	39	22	31	6	1.5712	2.63636	1.21827	0.684262	1.02569	0.218713
FBgn0032652	254.81	357.746	260.705	97.5036	80.7923	78.701	291.087	85.6656	1.76189	1.20758e-14	3.86131e-13	CG6870	2L	17591315	17592299	-	985	protein_coding	-	-	267	343	266	104	82	73	13.2529	17.9868	13.3876	5.21163	4.37128	4.28732
FBgn0032670	62.0324	111.6	66.6464	31.8762	39.4109	12.9371	80.0929	28.0747	1.50411	0.000387571	0.0017381	CG5783	2L	18156043	18157162	+	953	protein_coding	-	-	65	107	68	34	40	12	3.33471	5.79946	3.53731	1.76101	2.20393	0.72843
FBgn0032706	967.705	1275.58	1138.87	311.262	317.258	354.693	1127.38	327.738	1.78285	1.70459e-30	2.95771e-28	Irk3	2L	18711071	18713748	-	2096	protein_coding	-	-	1014	1223	1162	332	322	329	23.6529	30.1392	27.4835	7.8185	8.06669	9.08039
FBgn0032741	54.3976	68.8373	66.6464	14.063	35.4698	16.1714	63.2938	21.9014	1.52951	0.000362086	0.00163813	Side	2L	19027710	19030780	+	2188	protein_coding	-	Hairy_orange	57	66	68	15	36	15	1.27369	1.55809	1.5407	0.338392	0.863944	0.396592
FBgn0032753	43.8998	71.9663	77.4274	14.063	27.5876	14.0152	64.4312	18.5553	1.79325	4.24683e-05	0.000253585	CG17572	2L	19071131	19074149	-	1344	protein_coding	-	Trypsin	46	69	79	15	28	13	1.67338	2.65183	2.91397	0.550895	1.09393	0.559556
FBgn0032800	280.577	352.531	265.605	78.7529	111.336	90.56	299.571	93.5496	1.67908	5.5284e-14	1.63483e-12	CG10137	2L	19526686	19532985	+	3227	protein_coding	-	-	294	338	271	84	113	84	4.45436	5.41021	4.1632	1.28486	1.8387	1.50584
FBgn0032809	81.1193	90.7401	69.5867	8.43781	11.8233	8.62476	80.482	9.62862	3.06185	9.85854e-13	2.40332e-11	CG13078	2L	19563930	19565158	+	910	protein_coding	-	Cytochrom_B561	85	87	71	9	12	8	4.56683	4.93826	3.86788	0.488177	0.692421	0.508567
FBgn0033124	826.462	1000.23	753.692	197.82	374.404	320.194	860.127	297.473	1.5327	6.54928e-13	1.64415e-11	Tsp42Ec	2R	7006442	7008622	+	1025	protein_coding	-	Tetraspannin	866	959	769	211	380	297	41.3077	48.3271	37.1928	10.161	19.4666	16.7623
FBgn0033129	118.339	171.05	123.492	33.7513	41.3814	52.8267	137.627	42.6531	1.69381	1.82723e-08	2.30091e-07	Tsp42Eh	2R	7033562	7034920	+	1010	protein_coding	-	Tetraspannin	124	164	126	36	42	49	6.00257	8.38723	6.18452	1.75937	2.18353	2.80656
FBgn0033139	437.09	586.16	400.858	198.757	165.526	109.966	474.703	158.083	1.58286	7.47153e-12	1.6386e-10	Tsp42Er	2R	7064399	7066113	+	848	protein_coding	-	Tetraspannin	458	562	409	212	168	102	26.4062	34.2324	23.9102	12.34	10.4027	6.95831
FBgn0033204	222.362	265.962	181.317	37.5014	50.2489	50.6705	223.214	46.1403	2.27692	5.7192e-18	2.87958e-16	CG2065	2R	7663786	7665269	+	1233	protein_coding	-	adh_short	233	255	185	40	51	47	9.2391	10.6825	7.43816	1.6013	2.17189	2.20513
FBgn0033207	20.0412	46.9345	14.7014	2.8126	4.92636	9.70286	27.2257	5.81394	2.24079	0.0017682	0.00635679	CG12826	2R	7670327	7671103	-	717	protein_coding	-	-	21	45	15	3	5	9	1.43198	3.24183	1.03712	0.206528	0.366169	0.726145
FBgn0033215	147.923	114.729	128.392	28.126	29.5582	15.0933	130.348	24.2592	2.4178	2.93339e-13	7.76033e-12	CG1942	2R	7712578	7714182	+	1305	protein_coding	-	-	155	110	131	30	30	14	5.80709	4.3539	4.97642	1.13472	1.20709	0.620608
FBgn0033234	625.095	600.762	839.941	230.634	234.495	236.103	688.599	233.744	1.55906	1.02195e-18	5.60836e-17	CG8791	2R	7926653	7929922	+	2420	protein_coding	-	MFS_1	655	576	857	246	238	219	13.2331	12.2943	17.5559	5.0176	5.16407	5.23514
FBgn0033296	6533.44	7117.36	4049.75	730.34	1560.67	1287.25	5900.18	1192.75	2.30656	6.92408e-10	1.11304e-08	Mal-A7	2R	8468646	8471663	-	2717	protein_coding	-	-	6846	6824	4132	779	1584	1194	123.193	129.732	75.3923	14.1522	30.6123	25.4223
FBgn0033297	4032.1	4077.05	2845.21	559.708	1045.37	867.867	3651.45	824.316	2.14757	8.15553e-26	9.62271e-24	Mal-A8	2R	8471954	8473961	+	1814	protein_coding	-	-	4225	3909	2903	597	1061	805	113.874	111.308	79.3353	16.2448	30.712	25.6719
FBgn0033301	610.78	858.381	573.355	124.692	131.041	81.9353	680.839	112.556	2.59292	6.02238e-32	1.1843e-29	CG12780	2R	8551859	8552290	-	432	protein_coding	-	-	640	823	585	133	133	76	72.4325	98.4039	67.1319	15.1965	16.1658	10.1772
FBgn0033302	1848.56	2074.51	1595.59	266.26	291.641	168.183	1839.55	242.028	2.92368	1.84097e-53	1.20676e-50	Cyp6a14	2R	8564187	8567202	-	2959	protein_coding	-	p450	1937	1989	1628	284	296	156	32.0053	34.7205	27.2751	4.73751	5.25264	3.04986
FBgn0033353	29.5847	53.1925	54.8853	11.2504	13.7938	14.0152	45.8875	13.0198	1.81853	0.000164852	0.000833484	CG13749	2R	8933423	8934445	+	897	protein_coding	-	-	31	51	56	12	14	13	1.68969	2.9368	3.09494	0.660337	0.819533	0.838399
FBgn0033397	402.733	579.902	406.739	137.818	104.439	70.0762	463.125	104.111	2.14833	2.26569e-18	1.18813e-16	Cyp4p3	2R	9242320	9244410	+	1667	protein_coding	-	p450	422	556	415	147	106	65	12.377	17.228	12.3415	4.3527	3.33888	2.25568
FBgn0033403	45.8085	95.9551	54.8853	28.126	10.838	14.0152	65.5496	17.6598	1.88302	6.38333e-05	0.000364554	CG13739	2R	9309296	9351655	-	8117	protein_coding	-	-	48	92	56	30	11	13	0.289123	0.585448	0.342018	0.182433	0.0711587	0.0926505
FBgn0033437	407.505	447.443	348.913	99.3787	123.159	94.8724	401.287	105.803	1.92203	1.25511e-21	9.3728e-20	CG12926	2R	9608128	9610290	-	1347	protein_coding	-	-	427	429	356	106	125	88	15.4988	16.4508	13.102	3.88432	4.87274	3.77933
FBgn0033502	180.371	201.297	134.273	43.1266	70.9396	53.9048	171.98	55.9903	1.61954	9.44294e-09	1.24628e-07	CG12910	2R	10265057	10269205	+	2662	protein_coding	-	-	189	193	137	46	72	50	3.47129	3.74495	2.55134	0.852955	1.42022	1.08658
FBgn0033654	253.856	302.467	271.486	85.3157	98.5273	102.419	275.936	95.4207	1.53318	1.56832e-13	4.35402e-12	Sobp	2R	11827170	11839825	-	3104	protein_coding	-	-	266	290	277	91	100	95	4.18984	4.82584	4.424	1.44709	1.69164	1.77052
FBgn0033742	195.641	278.478	259.725	80.628	72.9102	89.4819	244.615	81.0067	1.59496	8.16371e-12	1.78708e-10	CG8550	2R	12471915	12474021	+	2107	protein_coding	-	-	205	267	265	86	74	83	4.75693	6.5455	6.23502	2.0147	1.84416	2.27884
FBgn0033756	8.5891	19.8168	8.82085	0	2.95582	2.15619	12.4089	1.704	2.88066	0.00758051	0.0216201	CG17760	2R	12625808	12628619	+	1535	protein_coding	-	G-alpha	9	19	9	0	3	2	0.286663	0.639354	0.290664	0	0.102623	0.075374
FBgn0033775	458.085	684.201	440.062	163.131	240.406	143.387	527.45	182.308	1.53118	4.97482e-11	9.65426e-10	Cyp9h1	2R	12840813	12842558	-	1617	protein_coding	-	p450	480	656	449	174	244	133	14.5134	20.9551	13.7655	5.31148	7.92338	4.75819
FBgn0033787	3485.27	4361.78	2805.03	572.834	1270.02	739.573	3550.69	860.808	2.04433	2.50159e-07	2.5445e-06	CG13321	2R	12953112	12955712	+	2043	protein_coding	-	-	3652	4182	2862	611	1289	686	87.3976	105.733	69.4477	14.7621	33.1295	19.4248
FBgn0033788	6188.92	7863.1	6514.68	1814.13	3491.81	1775.62	6855.57	2360.52	1.53814	2.13929e-05	0.000140778	CG13323	2R	13044695	13047256	-	2562	protein_coding	-	-	6485	7539	6647	1935	3544	1647	123.756	151.996	128.618	37.2802	72.6349	37.189
FBgn0033792	1095.59	1454.97	849.742	104.066	244.348	63.6076	1133.43	137.341	3.04431	2.49758e-07	2.54262e-06	CG13325	2R	13110769	13126014	+	4040	protein_coding	-	-	1148	1395	867	111	248	59	13.893	17.8357	10.6388	1.35618	3.2233	0.844832
FBgn0033830	12.4065	91.7831	12.7412	0.937535	2.95582	2.15619	38.9769	2.01651	4.27856	5.58268e-06	4.25242e-05	CG10814	2R	13375975	13377731	-	1458	protein_coding	-	-	13	88	13	1	3	2	0.435936	3.11761	0.44202	0.0338547	0.108042	0.0793546
FBgn0033851	15.2695	36.5046	15.6815	6.56274	3.94109	4.31238	22.4852	4.93874	2.17751	0.00264501	0.00892436	CG13332	2R	13525377	13526448	+	1072	protein_coding	-	-	16	35	16	7	4	4	0.72973	1.68643	0.739915	0.322315	0.195928	0.215856
FBgn0033873	382.692	331.671	360.675	82.5031	101.483	134.762	358.346	106.249	1.75856	3.2455e-16	1.29371e-14	CG6337	2R	13833575	13835096	-	1402	protein_coding	-	Peptidase_C1	401	318	368	88	103	125	13.9841	11.7159	13.0124	3.09821	3.85762	5.15777
FBgn0033932	29.5847	33.3757	36.2635	14.063	8.86745	11.859	33.0746	11.5965	1.51014	0.00329917	0.0107711	Dh44-R1	2R	14378097	14385359	+	2475	protein_coding	-	7tm_2	31	32	37	15	9	11	0.612384	0.667838	0.741111	0.299153	0.19094	0.257109
FBgn0033981	9448.96	10562.4	7926.02	91.8784	168.482	95.9505	9312.45	118.77	6.29208	1.63649e-224	1.93089e-220	Cyp6a21	2R	14885264	14886947	-	1631	protein_coding	-	p450	9901	10127	8087	98	171	89	296.799	320.718	245.805	2.96585	5.5052	3.15672
FBgn0034005	20.9956	26.0747	15.6815	10.3129	5.91164	4.31238	20.9173	6.84563	1.59924	0.0168918	0.041836	ItgalphaPS4	2R	15258761	15262873	+	3361	protein_coding	-	-	22	25	16	11	6	4	0.32003	0.384209	0.235998	0.161548	0.0937375	0.068848
FBgn0034127	4.77172	15.6448	12.7412	0	3.94109	0	11.0526	1.3137	3.06036	0.0138283	0.0355623	CG7848	2R	16433852	16435954	-	2103	protein_coding	-	Malic_M	5	15	13	0	4	0	0.116243	0.368424	0.306451	0	0.0998737	0
FBgn0034160	391.281	400.508	231.302	45.0017	111.336	51.7486	341.03	69.362	2.29697	3.05497e-13	7.99236e-12	CG5550	2R	16816589	16817577	+	938	protein_coding	-	Fibrinogen_C	410	384	236	48	113	48	21.3707	21.1458	12.4729	2.52589	6.32567	2.96032
FBgn0034276	652.771	924.089	775.254	154.693	279.817	122.903	784.038	185.805	2.07565	9.84735e-17	4.28741e-15	Sardh	2R	17753555	17756422	-	2750	protein_coding	-	DAO	684	886	791	165	284	114	12.1608	16.6417	14.2594	2.96161	5.42271	2.39813
FBgn0034279	221.408	260.747	147.014	45.0017	60.1016	40.9676	209.723	48.6903	2.1046	2.69468e-13	7.19334e-12	CG18635	2R	17767808	17769989	-	2073	protein_coding	-	-	232	250	150	48	61	38	5.47174	6.22927	3.58714	1.14293	1.54512	1.06044
FBgn0034286	63.9411	79.2672	75.4672	32.8137	24.6318	14.0152	72.8918	23.8203	1.60391	3.84244e-05	0.0002343	dpr13	2R	17975122	18007902	-	3283	protein_coding	-	V-set	67	76	77	35	25	13	0.997794	1.19575	1.16272	0.526228	0.399852	0.229072
FBgn0034289	2751.37	2944.36	2312.04	348.763	599.046	330.975	2669.26	426.261	2.64615	1.95834e-39	7.00196e-37	CG10910	2R	18020268	18022406	+	1991	protein_coding	-	-	2883	2823	2359	372	608	307	70.7963	73.2379	58.7372	9.22249	16.0348	8.92004
FBgn0034294	33.402	28.1607	29.4028	5.62521	6.89691	7.54667	30.3219	6.68959	2.18556	0.000186909	0.000927004	Muc55B	2R	18050019	18052107	-	1802	protein_coding	-	-	35	27	30	6	7	7	0.949621	0.773936	0.825321	0.164351	0.203974	0.224721
FBgn0034296	5450.26	6366.41	5330.73	1363.18	2563.68	1257.06	5715.8	1727.97	1.72573	1.04332e-15	3.85898e-14	CG10912	2R	18056064	18057065	-	910	protein_coding	-	-	5711	6104	5439	1454	2602	1166	306.837	346.473	296.302	78.8678	150.14	74.1237
FBgn0034317	438.998	1234.9	558.654	135.943	232.524	146.621	744.184	171.696	2.11557	4.15463e-05	0.000249119	CG14499	2R	18187707	18188573	+	867	protein_coding	-	-	460	1184	570	145	236	136	25.9403	70.5389	32.5921	8.25516	14.293	9.07443
FBgn0034394	5472.21	6703.3	6399.03	1856.32	2277.95	2046.23	6191.51	2060.16	1.58756	1.19818e-33	2.52452e-31	CG15096	2R	18808356	18816495	-	3675	protein_coding	-	MFS_1	5734	6427	6529	1980	2312	1898	76.2847	90.3332	88.0736	26.594	33.034	29.8771
FBgn0034440	24.8129	26.0747	17.6417	1.87507	4.92636	9.70286	22.8431	5.50143	2.07432	0.00347093	0.0112386	CG10073	2R	19380543	19384965	+	2824	protein_coding	-	-	26	25	18	2	5	9	0.450138	0.457269	0.315983	0.0349576	0.0929685	0.184365
FBgn0034484	165.102	236.759	166.616	50.6269	45.3225	65.7638	189.492	53.9044	1.81606	2.3378e-11	4.77227e-10	CG11044	2R	20231829	20234927	+	2041	protein_coding	-	-	173	227	170	54	46	61	4.14419	5.74486	4.12917	1.30595	1.18344	1.72897
FBgn0034512	5288.02	5660.31	5748.25	1786.94	2048.38	1813.36	5565.53	1882.89	1.56352	7.11698e-42	3.11012e-39	CG18067	2R	20534245	20535835	+	1530	protein_coding	-	-	5541	5427	5865	1906	2079	1682	177.065	183.217	190.035	61.4905	71.35	63.5967
FBgn0034538	954.344	1258.89	1099.67	280.323	353.713	283.539	1104.3	305.858	1.8517	2.25973e-29	3.75528e-27	CG16799	2R	20652557	20655096	-	1288	protein_coding	-	-	1000	1207	1122	299	359	263	37.9596	48.4047	43.1851	11.4586	14.6356	11.8124
FBgn0034539	5.72607	9.38691	2.94028	0	0.985273	0	6.01775	0.328424	4.06966	0.0172878	0.0425842	CG11159	2R	20655756	20656609	-	656	protein_coding	-	-	6	9	3	0	1	0	0.447182	0.708655	0.226712	0	0.0800436	0
FBgn0034541	17.1782	17.7308	14.7014	3.75014	1.97055	4.31238	16.5368	3.34436	2.31051	0.004085	0.0129299	CG13437	2R	20661585	20662595	+	782	protein_coding	-	-	18	17	15	4	2	4	1.12539	1.12289	0.950914	0.252482	0.134293	0.295905
FBgn0034566	26.7216	22.9458	31.363	4.68767	8.86745	8.62476	27.0101	7.3933	1.87693	0.00185157	0.00663025	CG9313	2R	20978901	20984043	+	3072	protein_coding	-	-	28	22	32	5	9	8	0.445629	0.369911	0.516399	0.0803388	0.153834	0.15065
FBgn0034582	89.7084	129.331	100.95	16.8756	35.4698	29.1086	106.663	27.1513	1.97723	2.24841e-08	2.79252e-07	Cht9	2R	21067992	21069286	-	1161	protein_coding	-	-	94	124	103	18	36	27	3.95852	5.51678	4.39806	0.765274	1.62817	1.34534
FBgn0034663	2011.76	2766.01	1945.49	423.766	887.731	606.968	2241.08	639.488	1.80934	3.54288e-16	1.40749e-14	CG4363	2R	21834230	21835047	-	687	protein_coding	-	-	2108	2652	1985	452	901	563	150.021	199.394	143.239	32.4757	68.865	47.408
FBgn0034711	1479.23	1603.08	2209.13	364.701	481.798	627.452	1763.81	491.317	1.84522	7.00523e-20	4.46782e-18	CG3290	2R	22206005	22207987	-	1762	protein_coding	-	-	1550	1537	2254	389	489	582	43.0093	45.0572	63.4168	10.8973	14.5725	19.1081
FBgn0034716	2605.36	3240.57	2757.98	666.587	647.324	569.234	2867.97	627.715	2.19109	1.529e-57	1.28862e-54	Oatp58Dc	2R	22223681	22228574	-	3138	protein_coding	-	-	2730	3107	2814	711	657	528	42.535	51.1428	44.4557	11.1839	10.9937	9.73376
FBgn0034736	192.778	261.79	137.213	49.6893	85.7187	59.2952	197.26	64.9011	1.60329	8.92629e-08	9.84311e-07	CG6018	2R	22550094	22552113	+	1955	protein_coding	-	COesterase	202	251	140	53	87	55	5.05175	6.63168	3.55008	1.33815	2.3367	1.62748
FBgn0034741	51.5346	49.0205	46.0644	14.063	19.7055	12.9371	48.8732	15.5685	1.64848	0.000159501	0.000812939	CG4269	2R	22597245	22600695	+	1783	protein_coding	-	-	54	47	47	15	20	12	1.48074	1.36158	1.30678	0.415257	0.588992	0.389341
FBgn0034860	2001.26	2581.4	2019.97	542.833	780.336	701.84	2200.88	675.003	1.70542	5.62213e-25	5.97617e-23	CG9812	2R	23412320	23419684	-	1574	protein_coding	-	-	2097	2475	2061	579	792	651	65.1374	81.2207	64.9127	18.1573	26.4211	23.9263
FBgn0034866	4.77172	7.30093	6.86066	0.937535	0	0	6.3111	0.312512	4.13963	0.013062	0.0339916	Or59c	2R	23472300	23473753	-	1399	protein_coding	-	-	5	7	7	1	0	0	0.174739	0.25845	0.248049	0.0352825	0	0
FBgn0034885	3016.68	4167.79	3165.7	784.717	1327.16	1102.89	3450.06	1071.59	1.68705	1.95518e-19	1.1734e-17	CG4019	2R	23607592	23614710	-	1804	protein_coding	-	-	3161	3996	3230	837	1347	1023	85.6693	114.416	88.7611	22.9016	39.2068	32.8049
FBgn0034978	206.138	300.381	241.103	62.8148	80.7923	100.263	249.208	81.29	1.61931	7.59418e-11	1.42454e-09	CG3257	2R	24116792	24123263	+	2911	protein_coding	-	-	216	288	246	67	82	93	3.62784	5.1103	4.18938	1.13608	1.47912	1.84816
FBgn0035042	14.3152	28.1607	9.80094	0	5.91164	3.23429	17.4256	3.04864	2.52411	0.00631495	0.0185811	CG3640	2R	24639688	24640756	+	994	protein_coding	-	SCP	15	27	10	0	6	3	0.737806	1.40305	0.498735	0	0.316953	0.174596
FBgn0035043	792.106	938.691	716.449	162.194	320.214	209.151	815.748	230.519	1.82338	1.48246e-16	6.26938e-15	CG4781	2R	24640683	24642239	-	1557	protein_coding	-	-	830	900	731	173	325	194	26.0631	29.8573	23.2748	5.48446	10.9604	7.20797
FBgn0035049	1000.15	1286.01	838.96	360.951	384.256	338.522	1041.71	361.243	1.52723	2.78892e-18	1.44963e-16	Mmp1	2R	24671294	24688184	-	4841	protein_coding	-	Hemopexin	1048	1233	856	385	390	314	10.5843	13.156	8.76587	3.92557	4.23019	3.75227
FBgn0035089	310.162	330.628	291.088	161.256	57.1458	86.2476	310.626	101.55	1.60984	4.31591e-08	5.09234e-07	Phk-3	2R	24970843	24973207	-	878	protein_coding	-	-	325	317	297	172	58	80	18.0978	18.6492	16.7694	9.66964	3.46868	5.27103
FBgn0035171	111.658	165.835	118.591	54.377	42.3667	42.0457	132.028	46.2632	1.50909	3.04585e-07	3.04818e-06	CG12502	3L	865396	871701	+	3743	protein_coding	-	-	117	159	121	58	43	39	1.52828	2.19419	1.60259	0.764865	0.603225	0.60276
FBgn0035176	5156.32	7523.09	5137.65	99.3787	114.292	134.762	5939.02	116.144	5.67929	9.54425e-209	5.63063e-205	CG13905	3L	902898	903810	+	913	protein_coding	-	-	5403	7213	5242	106	116	125	289.335	408.076	284.631	5.73075	6.67141	7.92025
FBgn0035245	61.078	65.7084	53.9052	7.50028	15.7644	22.64	60.2305	15.3015	1.98924	9.90055e-06	7.07122e-05	GC	3L	1623179	1629301	-	2685	protein_coding	-	VKG_Carbox	64	63	55	8	16	21	1.16539	1.21197	1.01549	0.147069	0.312901	0.452454
FBgn0035300	389.372	480.818	399.878	56.2521	108.38	98.1067	423.356	87.5796	2.27637	5.38958e-22	4.15632e-20	CG1139	3L	1971638	1974285	+	1578	protein_coding	-	Aa_trans	408	461	408	60	110	91	12.6413	15.09	12.8177	1.87681	3.6603	3.33606
FBgn0035313	54.3976	81.3532	54.8853	17.8132	18.7202	11.859	63.5454	16.1308	1.97074	2.97275e-06	2.39914e-05	CG13810	3L	2185930	2187676	+	1552	protein_coding	-	-	57	78	56	19	19	11	1.79564	2.59597	1.78876	0.60428	0.642825	0.410016
FBgn0035348	3574.97	5600.86	3732.2	877.533	947.832	986.457	4302.68	937.274	2.19875	3.7718e-38	1.2028e-35	CG16758	3L	2499372	2503606	-	1985	protein_coding	-	-	3746	5370	3808	936	962	915	92.2666	139.737	95.1027	23.2751	25.4475	26.6662
FBgn0035360	1188.16	1421.6	937.95	261.572	486.725	337.444	1182.57	361.914	1.70832	2.84661e-15	9.73541e-14	CG1246	3L	2648048	2650205	+	1865	protein_coding	-	-	1245	1363	957	279	494	313	32.6383	37.7497	25.4384	7.38417	13.9085	9.70879
FBgn0035445	59.1693	75.0953	51.945	16.8756	16.7496	14.0152	62.0699	15.8802	1.96272	2.00348e-06	1.68489e-05	CG12014	3L	3378268	3380083	+	1636	protein_coding	-	Sulfatase	62	72	53	18	17	13	1.85287	2.27324	1.60601	0.543082	0.545627	0.459684
FBgn0035476	261.49	274.306	267.566	83.4406	93.6009	79.7791	267.787	85.6068	1.64435	1.74428e-15	6.27464e-14	CG12766	3L	3938624	3940125	-	1075	protein_coding	-	Aldo_ket_red	274	263	273	89	95	74	12.4618	12.637	12.5896	4.08656	4.6403	3.9822
FBgn0035480	96.3888	141.847	139.173	33.7513	50.2489	42.0457	125.803	42.0153	1.58275	2.24048e-07	2.30675e-06	CG14984	3L	3951193	3952550	-	709	protein_coding	-	-	101	136	142	36	51	39	6.96486	9.90807	9.92884	2.5063	3.77707	3.18213
FBgn0035581	21.9499	18.7738	16.6616	5.62521	4.92636	3.23429	19.1284	4.59529	2.04933	0.00443397	0.0138623	CG17150	3L	4861269	4895749	+	14155	protein_coding	-	Dynein_heavy	23	18	17	6	5	3	0.0794429	0.0656839	0.0595382	0.0209227	0.0185477	0.0122606
FBgn0035583	856.047	1178.58	774.274	236.259	374.404	208.072	936.3	272.912	1.77753	1.87068e-15	6.68853e-14	CG13704	3L	4898900	4900869	+	682	protein_coding	-	-	897	1130	790	252	380	193	64.3051	85.5836	57.4248	18.2387	29.257	16.3709
FBgn0035607	179.417	236.759	142.114	30.0011	75.866	25.8743	186.096	43.9138	2.08041	9.55518e-09	1.25968e-07	CG4835	3L	5479790	5483663	+	3735	protein_coding	-	CBM_14	188	227	145	32	77	24	2.46096	3.13929	1.92457	0.422898	1.08251	0.371724
FBgn0035611	160.33	204.426	139.173	45.9392	47.2931	50.6705	167.976	47.9676	1.80839	2.34221e-11	4.773e-10	CG13285	3L	5533968	5535759	-	1227	protein_coding	-	-	168	196	142	49	48	47	6.69425	8.25102	5.7372	1.97119	2.05413	2.21591
FBgn0035661	2333.37	2750.36	2561.97	556.896	533.032	623.139	2548.57	571.022	2.15857	1.01165e-60	9.18185e-58	CG10477	3L	6033199	6034611	-	1361	protein_coding	-	Trypsin	2445	2637	2614	594	541	578	87.833	100.08	95.2147	21.5429	20.8723	24.568
FBgn0035734	643.228	809.36	722.329	113.442	178.334	181.12	724.972	157.632	2.20381	8.9954e-29	1.36073e-26	CG14823	3L	7066314	7069463	+	2339	protein_coding	-	-	674	776	737	121	181	168	14.0886	17.1367	15.6205	2.55348	4.0633	4.15507
FBgn0035904	1609.02	1841.92	1342.73	608.46	481.798	477.596	1597.89	522.618	1.61144	2.80661e-23	2.48986e-21	GstO3	3L	8518885	8520295	+	881	protein_coding	-	-	1686	1766	1370	649	489	443	93.5661	103.541	77.0906	36.3618	29.145	29.0889
FBgn0035921	46.7629	53.1925	28.4227	2.8126	5.91164	9.70286	42.7927	6.14237	2.81921	1.91684e-06	1.61318e-05	CG13305	3L	8644916	8646822	-	1364	protein_coding	-	-	49	51	29	3	6	9	1.75638	1.93131	1.054	0.108563	0.230976	0.381705
FBgn0035929	167.01	190.867	255.805	49.6893	64.0427	22.64	204.561	45.4574	2.16364	2.51305e-11	5.08601e-10	CG13311	3L	8801540	8802164	-	568	protein_coding	-	-	175	183	261	53	65	21	15.0635	16.6418	22.7797	4.60579	6.00891	2.1388
FBgn0036040	92.5714	115.772	63.7061	18.7507	23.6465	25.8743	90.6831	22.7572	1.99727	8.67219e-08	9.60781e-07	CG6749	3L	9731238	9733807	-	1834	protein_coding	-	-	97	111	65	20	24	24	2.58589	3.12622	1.757	0.538279	0.687136	0.757028
FBgn0036208	177.508	287.865	256.785	48.7518	92.6156	64.6857	240.719	68.6844	1.80955	1.15696e-10	2.10989e-09	CG10361	3L	11798948	11800861	-	1431	protein_coding	-	Aminotran_1_2	186	276	262	52	94	60	6.35492	9.96244	9.0765	1.79366	3.4492	2.42556
FBgn0036232	3730.53	4930.21	3768.46	1086.6	1424.7	964.895	4143.07	1158.73	1.83781	6.181e-28	8.89385e-26	CG14125	3L	11974905	11975810	+	860	protein_coding	-	CBM_14	3909	4727	3845	1159	1446	895	222.231	283.912	221.643	66.5214	88.2878	60.2039
FBgn0036278	376.966	502.721	448.883	150.943	117.247	111.044	442.857	126.411	1.80577	3.05279e-19	1.75707e-17	CrzR	3L	12339116	12351544	-	3238	protein_coding	-	7tm_1	395	482	458	161	119	103	5.96427	7.68894	7.01205	2.45429	1.92975	1.84018
FBgn0036288	502.939	708.19	466.525	161.256	218.73	209.151	559.218	196.379	1.51031	2.28158e-13	6.1744e-12	CG10660	3L	12486668	12490676	-	2310	protein_coding	-	-	527	679	476	172	222	194	11.1541	15.1829	10.2153	3.6753	5.04628	4.85836
FBgn0036360	37.2194	64.6654	53.9052	15.9381	11.8233	14.0152	51.93	13.9255	1.89585	3.15403e-05	0.000198477	CG10713	3L	13428839	13435229	-	2534	protein_coding	-	-	39	62	55	17	12	13	0.75248	1.26381	1.076	0.331146	0.24866	0.296781
FBgn0036363	20.0412	23.9888	16.6616	0.937535	2.95582	5.39048	20.2305	3.09461	2.7344	0.000695805	0.00286755	CG10140	3L	13439317	13440470	-	969	protein_coding	-	CBM_14	21	23	17	1	3	5	1.05958	1.22603	0.869725	0.0509393	0.162565	0.298501
FBgn0036410	4.77172	16.6878	11.7611	0	2.95582	2.15619	11.0736	1.704	2.71521	0.0157079	0.039402	CG8100	3L	14083615	14085964	+	2251	protein_coding	-	-	5	16	12	0	3	2	0.1086	0.367148	0.264279	0	0.0699804	0.051399
FBgn0036411	59.1693	39.6336	54.8853	1.87507	7.88218	6.46857	51.2294	5.40861	3.25891	1.23008e-08	1.60018e-07	Sox21a	3L	14103481	14108118	-	2335	protein_coding	-	HMG_box	62	38	56	2	8	6	1.2982	0.840607	1.18893	0.0422785	0.179901	0.14865
FBgn0036419	881.814	1040.9	652.743	222.196	297.552	244.728	858.487	254.825	1.75218	3.27954e-19	1.87841e-17	CG13482	3L	14329346	14329885	+	540	protein_coding	-	-	924	998	666	237	302	227	83.6595	95.4626	61.1416	21.6636	29.3659	24.3182
FBgn0036501	947.664	1255.76	898.746	300.011	313.317	256.587	1034.06	289.971	1.83307	1.97638e-26	2.42909e-24	CG7272	3L	15500938	15503769	+	1191	protein_coding	-	-	993	1204	917	320	318	238	40.7638	52.2169	38.1693	13.2622	14.0199	11.5602
FBgn0036563	29.5847	29.2037	36.2635	6.56274	7.88218	9.70286	31.684	8.04926	1.9832	0.000390342	0.00174921	CG13075	3L	16083993	16085264	+	1149	protein_coding	-	-	31	28	37	7	8	9	1.3191	1.25874	1.59639	0.300715	0.365595	0.453129
FBgn0036656	25.7673	21.9028	18.6218	8.43781	5.91164	3.23429	22.0973	5.86124	1.90202	0.0046645	0.0144833	CG13026	3L	16724678	16726169	-	1431	protein_coding	-	-	27	21	19	9	6	3	0.922489	0.758012	0.658219	0.310441	0.220162	0.121278
FBgn0036727	949.572	1222.38	934.03	179.069	192.128	154.168	1035.33	175.122	2.56194	3.33287e-50	1.96622e-47	CG7589	3L	17470127	17474517	+	2249	protein_coding	-	Neur_chan_LBD	995	1172	953	191	195	143	21.6307	26.9175	21.0068	4.19199	4.55277	3.67829
FBgn0036759	1155.71	1317.3	1043.8	162.194	360.61	297.554	1172.27	273.453	2.10111	2.22062e-20	1.51452e-18	CG5577	3L	17838650	17841427	-	2162	protein_coding	-	-	1211	1263	1065	173	366	276	27.3858	30.1748	24.4203	3.94973	8.88906	7.38505
FBgn0036835	41.0368	30.2467	16.6616	0	9.85273	5.39048	29.315	5.08107	2.53918	0.000925844	0.00364986	CG14075	3L	18984961	18985634	+	674	protein_coding	-	-	43	29	17	0	10	5	3.11922	2.22246	1.25039	0	0.77906	0.429151
FBgn0036881	59.1693	67.7943	65.6663	29.0636	10.838	23.7181	64.21	21.2066	1.59673	0.000130225	0.000680481	Cpr76Bd	3L	19532743	19538289	+	4525	protein_coding	-	Chitin_bind_4	62	65	67	31	11	22	0.6699	0.741978	0.734028	0.338158	0.127645	0.281257
FBgn0036899	39.1281	47.9775	49.9848	8.43781	13.7938	24.7962	45.6968	15.6759	1.55537	0.00132419	0.00495688	tey	3L	19650506	19664104	-	3431	protein_coding	-	-	41	46	51	9	14	23	0.584252	0.692522	0.736896	0.129479	0.214258	0.387799
FBgn0036935	295.847	336.886	284.227	114.379	78.8218	92.7162	305.653	95.3057	1.6792	5.41505e-15	1.80998e-13	CG14186	3L	20098084	20103827	-	3522	protein_coding	-	-	310	323	290	122	80	86	4.30338	4.73707	4.08193	1.70981	1.1927	1.41257
FBgn0036937	29.5847	33.3757	34.3033	2.8126	13.7938	12.9371	32.4212	9.84785	1.72966	0.00345377	0.0111892	Ir76b	3L	20108484	20111534	-	2308	protein_coding	-	Lig_chan	31	32	35	3	14	12	0.656694	0.716161	0.751777	0.0641597	0.31851	0.300777
FBgn0036945	1533.63	2050.52	1323.13	472.518	659.147	417.223	1635.76	516.296	1.66306	4.19938e-17	1.94308e-15	Ssk	3L	20188522	20189779	+	898	protein_coding	-	-	1607	1966	1350	504	669	387	87.4937	113.085	74.5271	27.7033	39.1183	24.9307
FBgn0036992	2382.04	2979.82	2045.46	832.531	1067.05	598.343	2469.11	832.641	1.5676	2.27827e-15	8.04828e-14	CG11796	3L	20438166	20439872	-	1518	protein_coding	-	Glyoxalase	2496	2857	2087	888	1083	555	80.3914	97.2153	68.1565	28.8747	37.4617	21.1505
FBgn0036995	159.375	414.067	270.506	20.6258	23.6465	7.54667	281.316	17.273	4.01241	3.32201e-25	3.62929e-23	atk	3L	20454690	20464862	-	5188	protein_coding	-	-	167	397	276	22	24	7	1.57381	3.95264	2.63734	0.209314	0.242908	0.0780545
FBgn0036997	318.751	709.233	398.898	41.2515	70.9396	58.2172	475.627	56.8028	3.06695	2.475e-25	2.7292e-23	CG5955	3L	20466944	20469592	+	1314	protein_coding	-	Epimerase	334	680	407	44	72	54	12.4276	26.7307	15.3552	1.65285	2.87718	2.37738
FBgn0037166	1213.93	1490.43	1204.54	170.631	263.068	216.697	1302.96	216.799	2.5881	4.61737e-48	2.36871e-45	CG11426	3L	22470556	22473509	+	1882	protein_coding	-	-	1272	1429	1229	182	267	201	33.0449	39.2201	32.3734	4.77341	7.44942	6.1784
FBgn0037174	101.16	126.202	90.1686	17.8132	29.5582	34.4991	105.844	27.2901	1.96192	1.49618e-08	1.90436e-07	CG14457	3L	22669956	22680034	+	1557	protein_coding	-	-	106	121	92	19	30	32	3.32854	4.01415	2.92925	0.60234	1.01173	1.18894
FBgn0037229	109.75	179.394	148.974	60.9398	48.2784	42.0457	146.039	50.4213	1.52953	1.99121e-07	2.06816e-06	CG9766	3R	4269221	4277928	-	1502	protein_coding	-	-	115	172	152	65	49	39	3.74339	5.915	5.01684	2.13609	1.713	1.50208
FBgn0037304	36.2651	65.7084	54.8853	12.188	13.7938	16.1714	52.2862	14.0511	1.8979	3.29794e-05	0.000205559	CG1113	3R	5253153	5255403	+	1992	protein_coding	-	-	38	63	56	13	14	15	0.932677	1.63361	1.39365	0.32213	0.369037	0.435614
FBgn0037307	30.539	42.7626	15.6815	2.8126	6.89691	16.1714	29.661	8.62698	1.79742	0.00761499	0.0216923	Tim17a2	3R	5258336	5262692	-	991	protein_coding	-	-	32	41	16	3	7	15	1.57875	2.13701	0.800392	0.149425	0.370898	0.875623
FBgn0037386	785.425	947.035	487.107	183.757	242.377	135.84	739.856	187.325	1.98011	1.54467e-15	5.57358e-14	CG1208	3R	5831639	5838782	+	2499	protein_coding	-	Sugar_tr	823	908	497	196	246	126	16.1017	18.7679	9.85931	3.87139	5.16892	2.91678
FBgn0037485	434.227	634.138	439.082	71.2526	62.0722	79.7791	502.482	71.0346	2.82363	6.63158e-37	1.863e-34	CG14606	3R	7214339	7217083	-	1925	protein_coding	-	Sugar_tr	455	608	448	76	63	74	11.5563	16.3143	11.5373	1.94876	1.71846	2.22383
FBgn0037517	598.374	745.738	555.713	177.194	273.906	192.979	633.275	214.693	1.56015	7.21528e-15	2.38468e-13	CG10086	3R	7790633	7793483	+	1864	protein_coding	-	-	627	715	567	189	278	179	16.4459	19.8133	15.0797	5.00487	7.83122	5.55529
FBgn0037563	635.593	865.682	662.544	191.257	280.803	146.621	721.273	206.227	1.80457	5.23566e-16	2.02543e-14	CG11672	3R	8289395	8290578	-	1122	protein_coding	-	-	666	830	676	204	285	136	29.0214	38.2104	29.8683	8.97458	13.3378	7.01206
FBgn0037615	26.7216	66.7514	32.3431	15.9381	4.92636	3.23429	41.9387	8.03291	2.36427	0.000189094	0.000935871	CG11760	3R	8719198	8721320	+	1908	protein_coding	-	-	28	64	33	17	5	3	0.717491	1.7326	0.857417	0.439792	0.137601	0.0909584
FBgn0037635	315.888	503.764	270.506	117.192	118.233	53.9048	363.386	96.4431	1.90936	1.1461e-10	2.09331e-09	CG9837	3R	8807679	8813579	-	2642	protein_coding	-	-	331	483	276	125	120	50	6.12537	9.44301	5.17884	2.33536	2.38495	1.09481
FBgn0037724	763.475	1193.18	633.141	46.8767	100.498	65.7638	863.265	71.0461	3.60377	7.2043e-41	2.83345e-38	Fst	3R	9644978	9646154	-	1177	protein_coding	-	-	800	1144	646	50	102	61	33.2315	50.2049	27.209	2.09686	4.55045	2.99815
FBgn0037750	829.325	1150.42	645.882	162.194	260.112	205.916	875.208	209.407	2.06354	5.07833e-20	3.27427e-18	Whamy	3R	9771795	9774419	-	2184	protein_coding	-	-	869	1103	659	173	264	191	19.4538	26.0867	14.9585	3.90994	6.3472	5.05918
FBgn0037761	32.4477	12.5159	25.4824	0	4.92636	4.31238	23.482	3.07958	2.95396	0.000426152	0.00187975	CG8534	3R	9812747	9813939	+	990	protein_coding	-	ELO	34	12	26	0	5	4	1.67912	0.626098	1.30195	0	0.265195	0.233735
FBgn0037906	823.599	1160.85	843.861	201.57	407.903	310.491	942.769	306.655	1.62076	8.30707e-13	2.06348e-11	PGRP-LB	3R	11452849	11460552	-	1775	protein_coding	-	-	863	1113	861	215	414	288	23.7711	32.3887	24.047	5.97884	12.2471	9.38629
FBgn0037973	1672.97	2205.92	1539.73	316.887	529.091	385.958	1806.21	410.645	2.13706	6.76518e-28	9.50267e-26	CG18547	3R	11978574	11980390	-	1131	protein_coding	-	Aldo_ket_red	1753	2115	1571	338	537	358	75.7803	96.5927	68.8605	14.7513	24.9311	18.3113
FBgn0038074	5923.61	8039.37	6403.93	225.946	465.049	176.808	6788.97	289.267	4.55244	8.25615e-23	6.90882e-21	Gnmt	3R	12674608	12676084	+	990	protein_coding	-	-	6207	7708	6534	241	472	164	306.537	402.164	327.19	12.016	25.0344	9.58315
FBgn0038082	1316.04	1472.7	1002.64	159.381	154.688	134.762	1263.79	149.61	3.07681	1.10694e-65	1.4512e-62	CG5724	3R	12739642	12741417	+	1710	protein_coding	-	UDPGT	1379	1412	1023	170	157	125	39.428	42.6516	29.6576	4.90715	4.82097	4.22877
FBgn0038139	12.4065	14.6019	15.6815	2.8126	1.97055	6.46857	14.2299	3.75057	1.94014	0.0202397	0.0485088	PK2-R2	3R	13329070	13334166	-	2932	protein_coding	-	7tm_1	13	14	16	3	2	6	0.216779	0.246638	0.270528	0.0505049	0.0358176	0.118382
FBgn0038173	48.6716	58.4074	43.1241	18.7507	15.7644	18.3276	50.0677	17.6142	1.50626	0.000364521	0.00164663	Adgf-C	3R	13706757	13709129	+	1737	protein_coding	-	-	51	56	44	20	16	17	1.43551	1.66527	1.25577	0.568338	0.483672	0.566173
FBgn0038257	5118.15	6171.37	4933.79	1043.48	1837.53	1316.35	5407.77	1399.12	1.95057	1.56907e-26	1.94879e-24	smp-30	3R	14745901	14751246	-	1666	protein_coding	-	-	5363	5917	5034	1113	1865	1221	157.387	183.452	149.794	32.9759	58.7807	42.3975
FBgn0038337	786.38	1023.17	958.532	254.072	305.434	296.476	922.695	285.328	1.69366	1.61199e-25	1.84658e-23	CG6125	3R	15402598	15407070	-	2532	protein_coding	-	Sulfate_transp	824	981	978	271	310	275	15.9111	20.0125	19.1484	5.28302	6.42878	6.28302
FBgn0038353	10163.8	13879.1	9936.19	2666.35	3114.45	2428.95	11326.3	2736.58	2.0491	8.32254e-40	3.16767e-37	CG5399	3R	15695241	15697142	+	1546	protein_coding	-	-	10650	13307	10138	2844	3161	2253	336.804	444.597	325.087	90.8023	107.361	84.3046
FBgn0038373	15.2695	28.1607	16.6616	7.50028	4.92636	0	20.0306	4.14221	2.24643	0.00629684	0.0185509	CG4546	3R	15846534	15848436	+	1773	protein_coding	-	-	16	27	17	8	5	0	0.441213	0.786595	0.475332	0.222719	0.148078	0
FBgn0038380	27.676	15.6448	11.7611	2.8126	5.91164	2.15619	18.3607	3.62681	2.3357	0.00386367	0.0123168	CG14877	3R	15889194	15896078	-	1478	protein_coding	-	ANF_receptor	29	15	12	3	6	2	0.959314	0.524219	0.402498	0.10019	0.213161	0.0782808
FBgn0038391	451.405	614.321	377.336	129.38	193.113	167.105	481.021	163.199	1.55985	2.73392e-12	6.41302e-11	GATAe	3R	16009105	16019133	+	3493	protein_coding	-	GATA	473	589	385	138	196	155	6.62063	8.7099	5.4641	1.9501	2.94638	2.56704
FBgn0038414	211.864	283.693	234.242	55.3145	110.351	75.4667	243.267	80.3773	1.59814	1.85621e-09	2.76883e-08	CG6901	3R	16323415	16325128	+	1581	protein_coding	-	Sugar_tr	222	272	239	59	112	70	6.86528	8.88655	7.49415	1.84203	3.71978	2.56133
FBgn0038416	269.125	311.854	260.705	102.191	97.542	92.7162	280.561	97.4832	1.52357	9.10765e-14	2.59568e-12	CG17930	3R	16327849	16329622	+	1653	protein_coding	-	Sugar_tr	282	299	266	109	99	86	8.34091	9.34318	7.97747	3.25484	3.1448	3.00971
FBgn0038431	68.7128	68.8373	65.6663	12.188	35.4698	21.5619	67.7388	23.0732	1.5563	0.000180709	0.000901408	CG10405	3R	16454492	16455797	+	929	protein_coding	-	Trypsin	72	66	67	13	36	20	3.78925	3.66965	3.57533	0.690723	2.03478	1.24541
FBgn0038450	5757.56	7379.15	6565.65	1753.19	1849.36	1624.69	6567.45	1742.41	1.91403	2.79248e-49	1.49766e-46	CG17560	3R	16617950	16619878	+	1712	protein_coding	-	NAD_binding_4	6033	7075	6699	1870	1877	1507	172.293	213.461	193.983	53.9156	57.5693	50.9224
FBgn0038466	1625.25	2087.02	1378.99	364.701	580.326	361.162	1697.09	435.396	1.96222	5.24397e-22	4.07063e-20	CG8907	3R	17008269	17012533	+	2467	protein_coding	-	SH3_1	1703	2001	1407	389	589	335	33.7507	41.8962	28.2736	7.78318	12.5365	7.85553
FBgn0038484	281.532	282.65	218.561	53.4395	49.2636	48.5143	260.914	50.4058	2.3705	2.76905e-23	2.47516e-21	CG5246	3R	17136111	17137195	+	1085	protein_coding	-	Trypsin	295	271	223	57	50	45	13.2932	12.9014	10.189	2.59311	2.41975	2.39929
FBgn0038595	109.75	78.2242	62.726	15.9381	23.6465	24.7962	83.5666	21.4603	1.96685	3.49825e-07	3.45116e-06	CG7142	3R	18278181	18279522	-	1342	protein_coding	-	Trypsin	115	75	64	17	24	23	4.18969	2.88672	2.3642	0.625278	0.939051	0.99146
FBgn0038632	70.6215	117.858	76.4473	29.0636	15.7644	12.9371	88.3089	19.255	2.18625	8.56987e-08	9.52127e-07	CG14301	3R	18629151	18641457	-	1846	protein_coding	-	CBM_14	74	113	78	31	16	12	1.95991	3.16186	2.09469	0.828908	0.455113	0.376053
FBgn0038658	11065.6	15219.3	12213.9	1722.25	2633.63	2235.97	12833	2197.28	2.54616	5.12341e-52	3.18164e-49	CG14292	3R	18904933	18905655	-	648	protein_coding	-	-	11595	14592	12462	1837	2673	2074	874.848	1163.15	953.387	139.93	216.598	185.154
FBgn0038680	833.143	983.539	601.778	263.447	255.186	270.602	806.153	263.078	1.61542	1.36791e-17	6.58775e-16	Cyp12a5	3R	19132648	19134704	+	1820	protein_coding	-	p450	873	943	614	281	259	251	23.452	26.7631	16.7245	7.62099	7.47238	7.97815
FBgn0038702	789.243	1056.55	1061.44	94.691	143.85	176.808	969.078	138.449	2.81104	1.03664e-39	3.8223e-37	CG3739	3R	19393360	19395188	+	1586	protein_coding	-	Peptidase_S28	827	1013	1083	101	146	164	25.4941	32.9915	33.8518	3.14336	4.83371	5.98192
FBgn0038730	120.247	206.512	152.895	61.8773	65.028	25.8743	159.885	50.9265	1.64376	1.26799e-06	1.10669e-05	CG6300	3R	19771382	19773225	-	1724	protein_coding	-	AMP-binding	126	198	156	66	66	24	3.57331	5.93232	4.48584	1.88966	2.01019	0.80533
FBgn0038731	623.187	794.758	711.548	203.445	185.231	126.137	709.831	171.604	2.04499	1.52334e-25	1.76215e-23	CG11659	3R	19775459	19777280	-	1705	protein_coding	-	AMP-binding	653	762	726	217	188	117	18.7252	23.0848	21.1091	6.2822	5.78981	3.96973
FBgn0038840	207.093	342.101	260.705	91.8784	94.5862	94.8724	269.966	93.779	1.52458	1.21468e-10	2.21173e-09	CG5621	3R	20901956	20908263	+	3640	protein_coding	-	Lig_chan	217	328	266	98	96	88	2.91471	4.65445	3.62274	1.32893	1.38484	1.39856
FBgn0038865	1073.64	1663.57	1081.04	294.386	456.181	379.49	1272.75	376.686	1.75667	9.62642e-18	4.73259e-16	CG10824	3R	21159238	21161092	-	1855	protein_coding	-	-	1125	1595	1103	314	463	352	29.6514	44.4133	29.4773	8.35531	13.1059	10.9774
FBgn0038959	41.9911	57.3644	39.2038	11.2504	18.7202	14.0152	46.1864	14.6619	1.65537	0.000333954	0.00153109	CG13856	3R	22402655	22405059	+	943	protein_coding	-	-	44	55	40	12	19	13	2.28128	3.01264	2.10283	0.628125	1.05797	0.797501
FBgn0039051	580.241	711.319	595.897	203.445	207.893	202.682	629.153	204.673	1.61958	3.63493e-23	3.17693e-21	CG17109	3R	23095690	23097240	+	1373	protein_coding	-	Peptidase_M20	608	682	608	217	211	188	21.6506	25.6573	21.9528	7.80128	8.06942	7.92113
FBgn0039053	18.1325	4.17196	12.7412	0	2.95582	2.15619	11.6819	1.704	2.79882	0.0127501	0.0333418	CG6738	3R	23099533	23100983	+	1291	protein_coding	-	Peptidase_M20	19	4	13	0	3	2	0.719556	0.160041	0.499199	0	0.122018	0.0896197
FBgn0039091	269.125	338.972	194.059	36.5639	55.1753	46.3581	267.385	46.0324	2.53929	4.98439e-20	3.23136e-18	CG10182	3R	23587120	23589819	-	2212	protein_coding	-	-	282	325	198	39	56	43	6.23306	7.58917	4.43748	0.870274	1.32933	1.12456
FBgn0039107	97.3431	98.041	71.5469	28.126	14.7791	24.7962	88.977	22.5671	1.97837	8.74613e-08	9.68064e-07	CG10300	3R	23711527	23713313	+	1484	protein_coding	-	-	102	94	73	30	15	23	3.3605	3.27183	2.43863	0.997847	0.530748	0.89659
FBgn0039137	1709.23	2072.42	1418.2	458.454	401.006	396.739	1733.28	418.733	2.04867	2.84723e-36	7.81267e-34	CG13604	3R	23988806	23992916	-	3259	protein_coding	-	UBA	1791	1987	1447	489	407	368	26.8688	31.4927	22.011	7.4063	6.55754	6.53226
FBgn0039232	2233.17	2797.3	2394.37	797.842	729.102	802.103	2474.94	776.349	1.67253	6.49308e-36	1.66548e-33	sosie	3R	24833952	24840488	+	2151	protein_coding	-	-	2340	2682	2443	851	740	744	53.1879	64.4043	56.304	19.5284	18.0643	20.0093
FBgn0039298	836.006	1145.2	899.726	345.013	305.434	233.947	960.312	294.798	1.70172	2.57819e-20	1.71865e-18	to	3R	25240180	25241668	+	1253	protein_coding	-	-	876	1098	918	368	310	217	34.1814	45.2634	36.3202	14.4968	12.991	10.0186
FBgn0039299	18.1325	36.5046	19.6019	3.75014	13.7938	2.15619	24.7464	6.56672	1.90515	0.00891063	0.0248491	CG11854	3R	25242020	25243262	+	1039	protein_coding	-	-	19	35	20	4	14	2	0.894077	1.74	0.954269	0.19003	0.707527	0.111356
FBgn0039310	1561.31	1747.01	1845.52	404.077	455.196	395.661	1717.94	418.311	2.03769	5.31922e-50	2.98864e-47	CG11878	3R	25273837	25275237	+	1345	protein_coding	-	-	1636	1675	1883	431	462	367	59.47	64.3263	69.404	15.8173	18.0364	15.785
FBgn0039321	1021.15	1360.06	973.233	316.887	335.978	328.819	1118.15	327.228	1.77251	5.08453e-27	6.66582e-25	CG10550	3R	25306407	25308391	-	1594	protein_coding	-	-	1070	1304	993	338	341	305	32.8195	42.2557	30.8829	10.4666	11.233	11.0691
FBgn0039347	38.1738	39.6336	27.4426	5.62521	10.838	10.781	35.0833	9.08139	1.95677	0.000342152	0.00156112	CG5071	3R	25618414	25620679	+	2266	protein_coding	-	-	40	38	28	6	11	10	0.863052	0.866204	0.612569	0.130698	0.254896	0.255294
FBgn0039452	1409.57	2264.33	1226.1	230.634	168.482	204.838	1633.33	201.318	3.01965	4.11432e-44	1.9418e-41	CG14245	3R	26728727	26729341	+	615	protein_coding	-	-	1477	2171	1251	246	171	190	117.42	182.34	100.841	19.7441	14.6	17.8722
FBgn0039453	127.882	162.706	125.452	15.0006	28.5729	16.1714	138.68	19.915	2.79805	2.83757e-16	1.15053e-14	CG6403	3R	26735417	26736307	-	749	protein_coding	-	-	134	156	128	16	29	15	8.74702	10.7582	8.47198	1.05442	2.03304	1.15854
FBgn0039500	39.1281	63.6224	38.2237	2.8126	21.676	22.64	46.9914	15.7095	1.58909	0.00560533	0.016826	CG5984	3R	27246403	27247992	-	1447	protein_coding	-	-	41	61	39	3	22	21	1.38533	2.1775	1.33614	0.102336	0.798334	0.839558
FBgn0039527	207.093	294.123	208.76	87.1907	89.6598	70.0762	236.659	82.3089	1.52059	2.63857e-10	4.59859e-09	CG5639	3R	27586474	27596130	-	5099	protein_coding	-	-	217	282	213	93	91	65	2.08071	2.85667	2.07086	0.900274	0.937102	0.737442
FBgn0039593	127.882	130.374	189.158	48.7518	43.352	35.5771	149.138	42.5603	1.8058	7.6464e-10	1.22084e-08	CG9989	3R	28670704	28672021	+	1214	protein_coding	-	-	134	125	193	52	44	33	5.39664	5.31848	7.88125	2.11427	1.90311	1.57252
FBgn0039596	110.704	126.202	77.4274	12.188	28.5729	12.9371	104.778	17.8993	2.54697	1.95101e-10	3.46164e-09	CG10000	3R	28748384	28751661	-	2597	protein_coding	-	Glycos_transf_2	116	121	79	13	29	12	2.18385	2.40663	1.50804	0.247086	0.58635	0.267306
FBgn0039628	511.529	648.74	564.534	135.943	149.761	186.511	574.934	157.405	1.87116	7.48221e-24	7.11956e-22	CG11841	3R	29051056	29052267	+	1076	protein_coding	-	Trypsin	536	622	576	145	152	173	24.3551	29.8589	26.5379	6.65169	7.41757	9.30108
FBgn0039770	104.978	120.987	99.9696	17.8132	38.4256	46.3581	108.645	34.199	1.67508	2.01878e-06	1.69534e-05	CG15537	3R	30435177	30443599	-	1600	protein_coding	-	-	110	116	102	19	39	43	3.36132	3.74485	3.16036	0.586152	1.2799	1.55471
FBgn0039801	491.487	543.398	519.45	144.38	198.04	186.511	518.112	176.31	1.55651	2.61774e-18	1.36667e-16	Npc2h	3R	30745479	30746290	-	812	protein_coding	-	-	515	521	530	154	201	173	31.009	33.1419	32.3576	9.36141	12.9978	12.3251
FBgn0039806	18.1325	29.2037	21.5621	6.56274	2.95582	7.54667	22.9661	5.68841	2.01631	0.00287894	0.0096038	CG15545	3R	30870939	30872351	-	1267	protein_coding	-	-	19	28	22	7	3	7	0.733186	1.1415	0.860801	0.272708	0.12433	0.319611
FBgn0039818	365.514	382.777	236.203	41.2515	112.321	53.9048	328.165	69.1591	2.2462	1.13026e-12	2.74967e-11	CG11318	3R	31106362	31109191	-	2764	protein_coding	-	7tm_2	383	367	241	44	114	50	6.77482	6.85842	4.32251	0.785762	2.1657	1.04648
FBgn0039850	9.54344	31.2897	26.4625	4.68767	3.94109	1.0781	22.4319	3.23562	2.77138	0.000682346	0.00281997	CG11333	3R	31463301	31464134	+	715	protein_coding	-	Isochorismatase	10	30	27	5	4	1	0.683803	2.16726	1.87204	0.345176	0.293755	0.0809084
FBgn0039872	3386.97	5010.52	3921.36	720.964	485.739	610.202	4106.28	605.635	2.76092	2.93149e-55	2.16179e-52	salt	3R	31751825	31754705	-	2114	protein_coding	-	-	3549	4804	4001	769	493	566	82.0801	117.38	93.8253	17.9555	12.2454	15.4886
FBgn0040093	41.9911	31.2897	47.0445	9.37535	10.838	11.859	40.1085	10.6908	1.91211	0.000132329	0.000690833	lectin-46Ca	2R	9817300	9818535	+	1105	protein_coding	-	Lectin_C	44	30	48	10	11	11	1.94683	1.40235	2.15345	0.446698	0.52271	0.575878
FBgn0040257	314.934	336.886	268.546	50.6269	52.2194	30.1867	306.788	44.3443	2.78312	8.99492e-29	1.36073e-26	Ugt86Dc	3R	11154626	11156513	+	1595	protein_coding	-	UDPGT	330	323	274	54	53	28	10.1156	10.4602	8.51621	1.67113	1.7448	1.01554
FBgn0040261	20.0412	18.7738	5.88056	0	0	0	14.8985	0	6.34137	1.69603e-05	0.000114613	Ugt36Bb	2L	16796595	16798273	+	1620	protein_coding	-	UDPGT	21	18	6	0	0	0	0.633784	0.573923	0.183609	0	0	0
FBgn0040262	96.3888	94.9121	65.6663	35.6263	20.6907	9.70286	85.6557	22.0066	1.94849	4.42282e-06	3.43547e-05	Ugt36Ba	2L	16794211	16796009	+	1799	protein_coding	-	UDPGT	101	91	67	38	21	9	2.7449	2.6128	1.84629	1.04263	0.612941	0.289408
FBgn0040299	819.782	1092.01	607.658	284.073	274.891	226.4	839.817	261.788	1.68037	6.7078e-16	2.56965e-14	Myo28B1	2L	7666047	7689459	+	7433	protein_coding	-	Myosin_head	859	1047	620	303	279	210	5.65023	7.27577	4.13508	2.01213	1.97093	1.63439
FBgn0040349	3876.55	4767.51	3665.55	436.891	897.583	746.042	4103.2	693.505	2.56527	6.92004e-35	1.57018e-32	CG3699	X	946662	947500	-	839	protein_coding	-	-	4062	4571	3740	466	911	692	236.709	281.414	220.987	27.4158	57.0147	47.7138
FBgn0040363	40.0825	56.3215	26.4625	14.063	6.89691	4.31238	40.9555	8.4241	2.26489	8.73988e-05	0.000477195	CG11384	X	1173877	1176035	-	2159	protein_coding	-	-	42	54	27	15	7	4	0.951116	1.29193	0.619966	0.342938	0.170246	0.107178
FBgn0040383	1282.64	1758.48	1275.1	280.323	457.166	437.707	1438.74	391.732	1.8777	1.6771e-21	1.24454e-19	CG5254	X	750347	758719	+	1683	protein_coding	-	Mito_carr	1344	1686	1301	299	464	406	39.0438	51.7452	38.3221	8.76927	14.4765	13.9554
FBgn0040531	36.2651	64.6654	60.7658	13.1255	12.8085	9.70286	53.8988	11.879	2.17581	3.72702e-06	2.93755e-05	CG11741	3R	8528423	8528877	-	455	protein_coding	-	-	38	62	62	14	13	9	4.08328	7.03844	6.75518	1.51877	1.50025	1.14428
FBgn0040653	603.146	713.405	608.638	180.007	186.217	113.2	641.73	159.808	2.00222	1.20124e-23	1.12487e-21	IM4	2R	20868496	20869321	-	767	protein_coding	-	-	632	684	621	192	189	105	40.2864	46.0635	40.1377	12.3561	12.9389	7.91943
FBgn0040723	716.713	1061.76	604.718	205.32	296.567	170.339	794.398	224.075	1.82457	1.00933e-14	3.28075e-13	CG5011	2L	1200671	1201220	+	550	protein_coding	-	-	751	1018	617	219	301	158	66.7597	95.6052	55.6133	19.6543	28.7365	16.6186
FBgn0040729	122.156	131.417	57.8255	6.56274	30.5434	12.9371	103.799	16.6811	2.63851	3.69881e-08	4.40386e-07	CG15126	2R	19690798	19691078	+	281	protein_coding	-	-	128	126	59	7	31	12	22.271	23.1612	10.4088	1.22961	5.79277	2.47044
FBgn0040730	24.8129	35.4617	31.363	4.68767	11.8233	6.46857	30.5459	7.65984	1.9955	0.000773738	0.00313831	CG15127	2R	19680768	19681391	-	624	protein_coding	-	-	26	34	32	5	12	6	2.03716	2.81443	2.54227	0.395514	1.00978	0.556245
FBgn0040759	64.8954	98.041	79.3876	18.7507	39.4109	24.7962	80.7747	27.6526	1.54624	4.6768e-05	0.000276738	CG13177	2R	12163675	12164896	+	1099	protein_coding	-	-	68	94	81	20	40	23	3.02516	4.41801	3.65379	0.898274	1.91114	1.21068
FBgn0040817	113.567	138.718	105.85	15.9381	32.514	20.4838	119.378	22.9786	2.37757	6.90839e-12	1.52359e-10	CG14132	3L	11712229	11715285	-	894	protein_coding	-	-	119	133	108	17	33	19	6.50798	7.68441	5.98884	0.938616	1.93824	1.22946
FBgn0040968	18.1325	15.6448	8.82085	5.62521	1.97055	1.0781	14.1994	2.89128	2.27321	0.0125127	0.0327864	CG14933	2L	11842828	11844012	+	1185	protein_coding	-	-	19	15	9	6	2	1	0.783921	0.653837	0.376514	0.249925	0.0886221	0.0488182
FBgn0041184	1093.68	1062.81	958.532	239.071	311.346	278.149	1038.34	276.189	1.91123	2.45592e-35	5.91375e-33	Socs36E	2L	18138675	18152417	-	3503	protein_coding	-	SH2	1146	1019	978	255	316	258	15.9949	15.0255	13.8406	3.59316	4.73672	4.26068
FBgn0041621	65.8498	122.03	104.87	38.4389	20.6907	23.7181	97.5832	27.6159	1.81496	1.38074e-06	1.19438e-05	Or82a	3R	4256972	4258444	+	1158	protein_coding	-	-	69	117	107	41	21	22	2.91325	5.21884	4.5807	1.74764	0.952229	1.09904
FBgn0042086	804.512	845.865	443.002	118.129	259.127	196.213	697.793	191.156	1.86887	6.71262e-12	1.48319e-10	Tsp42Eb	2R	6998848	6999848	+	865	protein_coding	-	Tetraspannin	843	811	452	126	263	182	47.6484	48.4285	25.9047	7.19004	15.965	12.1718
FBgn0042101	207.093	282.65	140.153	30.9386	56.1605	45.28	209.965	44.1264	2.25193	9.60843e-13	2.35207e-11	CG18744	3R	7797078	7798771	-	1336	protein_coding	-	-	217	271	143	33	57	42	7.94128	10.4775	5.30623	1.21923	2.24026	1.81862
FBgn0042102	397.962	444.314	300.889	72.1902	116.262	75.4667	381.055	87.973	2.11404	1.13052e-18	6.06316e-17	CG18745	3R	7783843	7786119	-	1567	protein_coding	-	-	417	426	307	77	118	70	13.0108	14.0423	9.71239	2.42548	3.95406	2.58422
FBgn0043783	3376.47	3227.01	3642.03	533.457	781.321	979.989	3415.17	764.922	2.15962	6.32561e-32	1.22354e-29	CG32444	3L	21636947	21639060	+	1280	protein_coding	-	Aldose_epim	3538	3094	3716	569	793	909	135.14	124.855	143.92	21.9421	32.5307	41.0822
FBgn0044050	28.6303	63.6224	54.8853	12.188	22.6613	2.15619	49.046	12.3351	1.98	0.000883241	0.00349475	Ilp3	3L	9801298	9802120	-	751	protein_coding	-	-	30	61	56	13	23	2	1.95307	4.19552	3.69662	0.854437	1.60812	0.15406
FBgn0044328	73.4845	75.0953	69.5867	23.4384	23.6465	12.9371	72.7221	20.0074	1.85397	1.35647e-06	1.17511e-05	CG32052	3L	9799062	9808713	+	2362	protein_coding	-	Metallophos	77	72	71	25	24	12	1.59385	1.57452	1.49017	0.52244	0.533534	0.293901
FBgn0046689	104.024	184.609	87.2284	45.0017	62.0722	22.64	125.287	43.2379	1.52913	7.16515e-05	0.000402005	Takl1	3R	20770828	20772601	-	1323	protein_coding	-	Pkinase	109	177	89	48	63	21	4.02813	6.9105	3.33493	1.79084	2.50041	0.918246
FBgn0046999	91.617	81.3532	85.2682	46.8767	17.7349	25.8743	86.0795	30.162	1.5077	7.03224e-05	0.000395677	CG6429	2R	16873015	16873755	+	672	protein_coding	-	-	96	78	87	50	18	24	6.98456	5.99545	6.4181	3.67263	1.40648	2.06605
FBgn0050158	79.2106	134.546	106.83	39.3765	34.4845	33.421	106.862	35.7607	1.57605	1.26825e-06	1.10669e-05	CG30158	2R	6891760	6922613	+	3657	protein_coding	-	Ras	83	129	109	42	35	31	1.10966	1.82205	1.4776	0.566893	0.502544	0.490384
FBgn0050160	257.673	297.252	138.193	65.6274	89.6598	57.1391	231.039	70.8088	1.70426	1.53278e-08	1.94391e-07	CG30160	2R	7005157	7006136	+	844	protein_coding	-	Tetraspannin	270	285	141	70	91	53	15.6408	17.4421	8.28196	4.09385	5.66147	3.63273
FBgn0050345	710.032	1034.65	604.718	180.944	211.834	167.105	783.132	186.628	2.06801	6.61524e-23	5.57523e-21	CG30345	2R	9148689	9151892	+	2217	protein_coding	-	MFS_1	744	992	617	193	215	155	16.4076	23.1123	13.7967	4.29703	5.09218	4.04451
FBgn0050360	13222.4	15659.4	11623.9	2166.64	4355.89	3196.55	13501.9	3239.7	2.0593	2.24933e-24	2.28792e-22	Mal-A6	2R	8465158	8467595	+	2291	protein_coding	-	-	13855	15014	11860	2311	4421	2965	295.678	338.507	256.635	49.7911	101.327	74.8685
FBgn0050488	34.3564	43.8056	22.5422	12.188	14.7791	4.31238	33.568	10.4265	1.67527	0.00370324	0.0118703	antr	2R	12846848	12848004	-	917	protein_coding	-	SCP	36	42	23	13	15	4	1.91942	2.36579	1.24341	0.699762	0.85892	0.252343
FBgn0050489	993.472	973.11	822.299	297.199	321.199	212.385	929.627	276.927	1.74531	8.66824e-23	7.20258e-21	Cyp12d1-p	2R	11117225	11121884	-	4482	protein_coding	-	p450	1041	933	839	317	326	197	11.3558	10.7524	9.27997	3.49111	3.81923	2.54269
FBgn0050502	304.436	319.155	199.939	61.8773	75.866	70.0762	274.51	69.2732	1.98703	1.2587e-15	4.64105e-14	fa2h	2R	7446189	7451553	-	1399	protein_coding	-	-	319	306	204	66	77	65	11.1483	11.298	7.22885	2.32864	2.89004	2.68779
FBgn0051004	6441.82	7854.76	5084.73	1289.11	2191.25	1455.43	6460.44	1645.26	1.97327	1.60612e-23	1.45774e-21	mesh	3R	31178389	31195762	-	5175	protein_coding	-	VWD	6750	7531	5188	1375	2224	1350	63.7721	75.169	49.6988	13.115	22.566	15.0912
FBgn0051036	89.7084	70.9233	70.5668	15.9381	26.6024	31.2648	77.0661	24.6017	1.65513	1.03517e-05	7.34896e-05	CG31036	3R	29908107	29912892	+	3322	protein_coding	-	-	94	68	72	17	27	29	1.38346	1.05732	1.07446	0.252596	0.426771	0.505008
FBgn0051104	1131.85	1287.05	1021.26	296.261	328.096	258.743	1146.72	294.367	1.96065	1.1109e-35	2.78884e-33	CG31104	3R	25285473	25286974	+	1382	protein_coding	-	-	1186	1234	1042	316	333	240	41.9579	46.1215	37.378	11.2864	12.6522	10.0462
FBgn0051106	809.284	1002.31	640.001	300.949	179.32	227.478	817.2	235.915	1.79117	6.07286e-17	2.73487e-15	CG31106	3R	25216297	25218708	+	1676	protein_coding	-	MFS_1	848	961	653	321	182	211	24.7377	29.6173	19.315	9.45383	5.70201	7.28296
FBgn0051140	634.639	859.424	708.608	286.886	224.642	213.463	734.224	241.664	1.60124	1.08065e-18	5.83717e-17	CG31140	3R	23963180	23983232	+	7622	protein_coding	-	RA	665	824	723	306	228	198	4.26569	5.58412	4.70247	1.98166	1.57071	1.50278
FBgn0051272	1889.6	2575.14	1490.72	212.82	166.511	135.84	1985.16	171.724	3.52843	2.88192e-63	2.83365e-60	CG31272	3R	10756296	10759398	-	2102	protein_coding	-	MFS_1	1980	2469	1521	227	169	126	46.0542	60.6715	35.8718	5.33052	4.22167	3.46767
FBgn0051683	17.1782	5.21495	18.6218	0.937535	0.985273	5.39048	13.6716	2.43776	2.52188	0.0122542	0.0322738	CG31683	2L	20447734	20449964	-	2031	protein_coding	-	-	18	5	19	1	1	5	0.433311	0.127162	0.463767	0.0243034	0.0258536	0.142416
FBgn0051697	10.4978	11.4729	6.86066	1.87507	1.97055	1.0781	9.61044	1.64124	2.53901	0.0191956	0.046488	CG31697	2L	19535448	19536104	+	657	protein_coding	-	-	11	11	7	2	2	1	0.818586	0.864816	0.528189	0.150259	0.159844	0.088051
FBgn0051778	424.683	633.095	575.315	209.07	152.717	161.714	544.364	174.501	1.63944	1.02259e-15	3.7942e-14	CG31778	2L	3704106	3705488	-	1137	protein_coding	-	-	445	607	587	223	155	150	19.1354	27.5756	25.5938	9.68102	7.15817	7.63186
FBgn0051792	37.2194	40.6766	24.5024	9.37535	6.89691	15.0933	34.1328	10.4552	1.71462	0.00171828	0.00619998	CG31792	2L	18997448	19002713	+	4390	protein_coding	-	ABC_membrane	39	39	25	10	7	14	0.434347	0.458877	0.282314	0.112438	0.0837267	0.184486
FBgn0051809	51.5346	65.7084	31.363	25.3134	6.89691	16.1714	49.5353	16.1273	1.61398	0.00171477	0.00619302	CG31809	2L	16853620	16858714	-	1338	protein_coding	-	adh_short	54	63	32	27	7	15	1.97322	2.4321	1.18563	0.996057	0.274709	0.648537
FBgn0051954	2.86303	5.21495	5.88056	0	0	0	4.65285	0	4.6617	0.0134867	0.0348433	CG31954	2L	3509058	3510102	-	978	protein_coding	-	Trypsin	3	5	6	0	0	0	0.149975	0.264075	0.304137	0	0	0
FBgn0051956	459.994	583.031	464.565	156.568	196.069	144.465	502.53	165.701	1.59921	4.9902e-17	2.27334e-15	pgant4	2L	3472603	3475338	+	2543	protein_coding	-	Ricin_B_lectin	482	559	474	167	199	134	9.26697	11.3543	9.24035	3.24151	4.10901	3.0483
FBgn0052023	891.358	1183.79	1062.42	217.508	267.009	283.539	1045.86	256.019	2.03154	1.89694e-33	3.92666e-31	CG32023	3L	8803602	8804182	-	525	protein_coding	-	-	934	1135	1084	232	271	263	86.981	111.669	102.359	21.8125	27.1045	28.9799
FBgn0052053	95.4344	168.964	98.0094	34.6888	53.2047	37.7333	120.803	41.8756	1.52673	5.31862e-06	4.06704e-05	CG32053	3L	10090170	10092346	-	1618	protein_coding	-	Sugar_tr	100	162	100	37	54	35	3.02175	5.17169	3.06392	1.12876	1.75245	1.25138
FBgn0052160	18.1325	9.38691	7.84075	0.937535	0	4.31238	11.7867	1.74997	2.79219	0.0119926	0.0317407	CR32160	3L	16308940	16311318	+	2138	lincRNA	-	-	19	9	8	1	0	4	0.434493	0.217436	0.185498	0.0230871	0	0.108231
FBgn0052198	61.078	122.03	118.591	1.87507	0.985273	2.15619	100.566	1.67218	5.91721	2.13567e-15	7.56719e-14	CG32198	3L	18526976	18527445	+	470	protein_coding	-	-	64	117	121	2	1	2	6.65762	12.8583	12.7627	0.210043	0.11172	0.246168
FBgn0052260	8.5891	13.5589	4.90047	0.937535	1.97055	1.0781	9.01615	1.32873	2.7593	0.0194344	0.046941	CG32260	3L	4142364	4145966	+	1967	protein_coding	-	Trypsin	9	13	5	1	2	1	0.223705	0.341378	0.126015	0.0250941	0.0533895	0.02941
FBgn0052279	17.1782	37.5476	24.5024	1.87507	4.92636	1.0781	26.4094	2.62651	3.31657	3.28212e-05	0.00020479	Drsl2	3L	3314349	3314681	+	333	protein_coding	-	-	18	36	25	2	5	1	2.64281	5.58412	3.72179	0.296457	0.788418	0.173722
FBgn0052283	14.3152	31.2897	25.4824	2.8126	7.88218	0	23.6958	3.56493	2.71354	0.000961731	0.00376617	Drsl3	3L	3314996	3315355	+	360	protein_coding	-	-	15	30	26	3	8	0	2.03716	4.30442	3.58037	0.411335	1.16686	0
FBgn0052302	23.8586	12.5159	11.7611	2.8126	5.91164	4.31238	16.0452	4.34554	1.89014	0.0170007	0.0420438	CG32302	3L	2268825	2269903	+	1079	protein_coding	-	CBM_14	25	12	12	3	6	4	1.13281	0.574455	0.551336	0.137239	0.291985	0.214456
FBgn0052311	3260.99	4511.97	3647.91	1301.3	1279.87	1261.37	3806.96	1280.85	1.57135	6.48917e-29	1.03467e-26	zormin	3L	2117466	2151700	-	12186	protein_coding	-	I-set	3417	4326	3722	1388	1299	1170	13.7095	18.3367	15.1416	5.62218	5.5973	5.55424
FBgn0052547	40.0825	57.3644	49.0047	13.1255	13.7938	15.0933	48.8172	14.0042	1.80228	5.60251e-05	0.000324836	CG32547	X	18443027	18479487	-	4570	protein_coding	-	7tm_1	42	55	50	14	14	14	0.449335	0.621646	0.542388	0.151213	0.160858	0.17722
FBgn0052553	4.77172	4.17196	6.86066	0	0	0	5.26811	0	4.84261	0.00758287	0.0216216	CG32553	X	18124575	18127027	-	1066	protein_coding	-	-	5	4	7	0	0	0	0.229324	0.19382	0.325535	0	0	0
FBgn0052557	542.068	784.328	541.992	130.317	286.714	182.198	622.796	199.743	1.64071	7.24154e-11	1.36828e-09	CG32557	X	17852958	17856129	-	2131	protein_coding	-	-	568	752	553	139	291	169	13.0317	18.2277	12.8647	3.21964	7.17035	4.58778
FBgn0052755	15.2695	26.0747	10.781	1.87507	7.88218	4.31238	17.3751	4.68988	1.89115	0.017616	0.0432572	CG32755	X	5950251	5951711	+	1347	protein_coding	-	Trypsin	16	25	11	2	8	4	0.58075	0.958669	0.404838	0.073289	0.311855	0.171788
FBgn0052843	376.012	493.334	465.545	121.88	143.85	148.777	444.963	138.169	1.6883	1.08343e-18	5.83717e-17	Dh31-R	2R	13267798	13295927	-	3284	protein_coding	-	7tm_2	394	473	475	130	146	138	5.86584	7.43968	7.17046	1.95397	2.33443	2.43095
FBgn0053110	441.861	511.065	467.505	144.38	166.511	132.606	473.477	147.832	1.67794	5.19506e-21	3.71494e-19	CG33110	3R	22570188	22580392	+	2005	protein_coding	-	ELO	463	490	477	154	169	123	11.2903	12.6234	11.794	3.79125	4.42591	3.54887
FBgn0053147	293.938	387.992	338.132	141.568	97.542	112.122	340.021	117.077	1.53597	6.7578e-13	1.69289e-11	Hs3st-A	2R	18718114	18754675	+	5724	protein_coding	-	Sulfotransfer_1	308	372	345	151	99	104	2.6308	3.35691	2.98797	1.30213	0.908168	1.05107
FBgn0053196	1009.7	1425.77	1077.12	440.641	370.462	428.004	1170.86	413.036	1.50287	2.30133e-19	1.35767e-17	dp	2L	4477462	4614300	-	71820	protein_coding	-	EGF_CA	1058	1367	1099	470	376	397	0.72024	0.983149	0.758593	0.32302	0.274899	0.319775
FBgn0053233	20.0412	22.9458	31.363	5.62521	0.985273	5.39048	24.7833	4.00032	2.63388	0.000314923	0.00145717	CG33233	3L	2659639	2661501	+	1719	protein_coding	-	Sugar_tr	21	22	32	6	1	5	0.597283	0.661063	0.922849	0.172287	0.030546	0.168265
FBgn0053234	5.72607	11.4729	6.86066	0	0.985273	0	8.01987	0.328424	4.48413	0.0048578	0.014977	CG33234	3L	2661622	2663622	+	1523	protein_coding	-	MFS_1	6	11	7	0	1	0	0.192614	0.373069	0.227853	0	0.0344771	0
FBgn0053267	21.9499	19.8168	12.7412	9.37535	1.97055	2.15619	18.1693	4.50069	1.99402	0.0129775	0.0338242	CG33267	3L	11564483	11572796	+	742	protein_coding	-	-	23	19	13	10	2	2	1.51552	1.32265	0.868552	0.665231	0.141533	0.155929
FBgn0053346	121.202	155.405	135.253	45.9392	56.1605	34.4991	137.287	45.5329	1.58795	3.74481e-08	4.45413e-07	CG33346	3R	28669233	28670452	+	1096	protein_coding	-	-	127	149	138	49	57	32	5.6654	7.02218	6.24202	2.2068	2.73083	1.68904
FBgn0053470	56.3063	54.2355	80.3677	10.3129	35.4698	16.1714	63.6365	20.6514	1.62459	0.000442342	0.00193806	CG33470	2R	13411739	13413085	+	1159	protein_coding	-	-	59	52	82	11	36	15	2.48889	2.31748	3.50741	0.468474	1.63098	0.7487
FBgn0053503	88.754	108.471	101.93	18.7507	27.5876	23.7181	99.7182	23.3521	2.09601	6.17188e-10	1.00306e-08	Cyp12d1-d	2R	11123658	11125647	-	1812	protein_coding	-	p450	93	104	104	20	28	22	2.50935	2.96464	2.84532	0.544814	0.811392	0.702367
FBgn0053542	57.2607	63.6224	75.4672	9.37535	10.838	9.70286	65.4501	9.97207	2.71446	1.00314e-09	1.57186e-08	upd3	X	18277233	18284596	+	2221	protein_coding	-	-	60	61	77	10	11	9	1.32081	1.41866	1.71869	0.222243	0.260061	0.234419
FBgn0053696	9.54344	23.9888	31.363	3.75014	8.86745	6.46857	21.6317	6.36205	1.76793	0.013702	0.0352915	CNMaR	3L	9644109	9659433	+	2704	protein_coding	-	7tm_1	10	23	32	4	9	6	0.180813	0.439357	0.586678	0.073018	0.17477	0.128364
FBgn0054040	1221.56	1377.79	835.04	37.5014	43.352	84.0914	1144.8	54.9816	4.38981	6.05425e-65	6.49401e-62	CG34040	2R	21832501	21833551	-	980	protein_coding	-	-	1280	1321	852	40	44	78	63.8588	69.6263	43.0993	2.0147	2.35753	4.60435
FBgn0054043	370.286	439.099	454.764	148.13	65.028	85.1695	421.383	99.4427	2.07962	8.01256e-16	3.02045e-14	CG34043	2L	10278951	10280872	-	1227	protein_coding	-	-	388	421	464	158	66	79	15.4605	17.7229	18.7469	6.35608	2.82442	3.72462
FBgn0054045	24.8129	26.0747	12.7412	5.62521	4.92636	6.46857	21.2096	5.67338	1.90436	0.0057119	0.0170959	CG34045	2R	19330889	19335188	+	581	protein_coding	-	-	26	25	13	6	5	6	2.18793	2.22259	1.10924	0.509744	0.451881	0.597413
FBgn0058198	114.521	128.288	103.89	33.7513	23.6465	44.2019	115.566	33.8666	1.77504	2.84377e-08	3.46987e-07	CG40198	3R	4160610	4162235	-	1567	protein_coding	-	-	120	123	106	36	24	41	3.74412	4.05445	3.35346	1.13399	0.804216	1.51361
FBgn0063491	2063.29	2591.83	2378.69	615.023	817.776	718.012	2344.6	716.937	1.70958	1.53929e-30	2.71076e-28	GstE9	2R	18409048	18409835	+	788	protein_coding	-	GST_C	2162	2485	2427	656	830	666	134.143	162.891	152.686	41.0917	55.3073	48.8931
FBgn0063497	4524.55	6005.54	3573.42	627.211	701.514	507.783	4701.17	612.169	2.94041	8.41459e-57	6.61891e-54	GstE3	2R	18400713	18401467	+	755	protein_coding	-	GST_C	4741	5758	3646	669	712	471	307.015	393.932	239.401	43.7377	49.5181	36.0889
FBgn0063923	607.917	835.435	591.977	115.317	147.791	122.903	678.443	128.67	2.39817	3.92783e-34	8.58232e-32	Kaz1-ORFB	3L	216625	218058	+	1276	protein_coding	-	-	637	801	604	123	150	114	24.4076	32.4249	23.4662	4.75807	6.17264	5.16837
FBgn0065110	9.54344	13.5589	9.80094	3.75014	0	1.0781	10.9678	1.60941	2.7431	0.0134698	0.0348208	ppk10	2L	10450134	10452396	-	1653	protein_coding	-	-	10	13	10	4	0	1	0.295777	0.406225	0.299905	0.119444	0	0.0349967
FBgn0083015	25.7673	11.4729	25.4824	7.50028	5.91164	6.46857	20.9075	6.62683	1.65881	0.0142692	0.0365052	snoRNA:Psi18S-920	3L	11822984	11823124	+	141	snoRNA	-	-	27	11	26	8	6	6	9.36228	4.02967	9.14136	2.80058	2.23441	2.46168
FBgn0083981	20.0412	18.7738	18.6218	4.68767	7.88218	6.46857	19.1456	6.34614	1.59623	0.0172601	0.0425426	RunxA	X	20590252	20623773	-	4831	protein_coding	-	Runt	21	18	19	5	8	6	0.21253	0.192456	0.194972	0.0510869	0.0869528	0.0718479
FBgn0085195	7817.99	11910.9	8930.62	2312.9	2157.75	1646.25	9553.18	2038.97	2.22783	3.32445e-38	1.08959e-35	CG34166	2L	14743193	14743879	+	613	protein_coding	-	-	8192	11420	9112	2467	2190	1527	653.381	962.281	736.902	198.648	187.592	144.105
FBgn0085223	85.891	123.073	49.9848	39.3765	24.6318	20.4838	86.3162	28.164	1.60883	9.50866e-05	0.000513901	CG34194	2R	17544190	17545045	+	655	protein_coding	-	-	90	118	51	42	25	19	6.71797	9.30544	3.85998	3.16508	2.00415	1.67808
FBgn0085227	544.931	694.631	436.142	62.8148	104.439	71.1543	558.568	79.4693	2.81296	1.73127e-32	3.52193e-30	CG34198	2R	19682446	19682977	-	532	protein_coding	-	-	571	666	445	67	106	66	52.4761	64.6635	41.4672	6.21641	10.4622	7.17682
FBgn0085246	248.129	398.422	181.317	5.62521	4.92636	3.23429	275.956	4.59529	5.89326	5.15591e-34	1.10608e-31	CG34217	2R	8227990	8228727	-	738	protein_coding	-	-	260	382	185	6	5	3	17.2248	26.7364	12.4272	0.401302	0.355749	0.235161
FBgn0085313	500.076	734.265	489.067	120.004	128.085	111.044	574.469	119.711	2.26125	8.17908e-28	1.13535e-25	CG34284	3R	18902338	18902933	-	520	protein_coding	-	-	524	704	499	128	130	103	49.268	69.9303	47.5723	12.1502	13.1272	11.4587
FBgn0085404	90.6627	100.127	56.8455	13.1255	23.6465	33.421	82.5451	23.3977	1.82743	7.99598e-06	5.81656e-05	CG34375	3R	23000139	23010562	-	2266	protein_coding	-	-	95	96	58	14	24	31	2.04975	2.1883	1.26889	0.304961	0.556137	0.79141
FBgn0085413	181.325	258.661	218.561	87.1907	54.19	83.0133	219.516	74.798	1.5527	1.55741e-09	2.36498e-08	CG34384	3R	7814361	7855392	+	9058	protein_coding	-	SAM_1	190	248	223	93	55	77	1.02555	1.41422	1.22048	0.506789	0.318831	0.491766
FBgn0085456	38.1738	61.5364	55.8654	3.75014	2.95582	4.31238	51.8585	3.67278	3.82321	4.10335e-10	6.85771e-09	CG34427	3L	8804764	8805812	+	865	protein_coding	-	-	40	59	57	4	3	4	2.2609	3.52316	3.26675	0.228255	0.182111	0.267512
FBgn0086693	23.8586	33.3757	32.3431	5.62521	9.85273	7.54667	29.8591	7.67487	1.96143	0.000741447	0.00302501	iav	X	6813978	6818156	+	3512	protein_coding	-	Ion_trans	25	32	33	6	10	7	0.348035	0.470643	0.465818	0.0843283	0.149512	0.115304
FBgn0086708	1303.63	1684.43	1281.96	459.392	533.032	499.158	1423.34	497.194	1.51734	4.40546e-23	3.79266e-21	stv	3L	13477541	13483515	+	3670	protein_coding	-	-	1366	1615	1308	490	541	463	18.1979	22.7302	17.6684	6.59032	7.74037	7.29818
FBgn0250910	49.6259	81.3532	82.3279	27.1885	22.6613	19.4057	71.1023	23.0852	1.61783	3.1626e-05	0.00019891	Octbeta3R	3R	12511570	12548229	-	6101	protein_coding	-	7tm_1	52	78	84	29	23	18	0.416715	0.660374	0.682551	0.234625	0.197951	0.170676
FBgn0259210	179.417	214.856	189.158	59.0647	76.8513	65.7638	194.477	67.2266	1.53253	1.44451e-10	2.59023e-09	prom	2R	24415410	24428387	-	4379	protein_coding	-	Prominin	188	206	193	63	78	61	2.09904	2.4299	2.18494	0.710137	0.935299	0.805851
FBgn0259229	456.177	796.844	484.166	136.88	218.73	125.059	579.062	160.223	1.85228	2.89767e-13	7.68305e-12	CG42329	2L	1219293	1229802	+	2477	protein_coding	-	-	478	764	494	146	222	116	9.43494	15.9318	9.88684	2.9094	4.70606	2.70914
FBgn0259714	221.408	240.931	223.461	70.3151	47.2931	63.6076	228.6	60.4053	1.91928	8.25216e-16	3.10087e-14	CG42368	2L	6377771	6411326	-	3150	protein_coding	-	I-set	232	231	228	75	48	59	3.60093	3.78789	3.58823	1.17524	0.800131	1.08353
FBgn0259716	1006.83	1327.73	969.313	176.257	174.393	155.246	1101.29	168.632	2.70579	6.3011e-55	4.37333e-52	CG42370	2L	6383435	6385512	-	2078	protein_coding	-	-	1055	1273	989	188	177	144	24.8224	31.6431	23.5943	4.46569	4.47258	4.00882
FBgn0259918	65.8498	123.073	83.308	35.6263	23.6465	32.3429	90.7435	30.5386	1.5689	1.61143e-05	0.00010965	inaF-B	X	11724668	11732770	-	3113	protein_coding	-	-	69	118	85	38	24	30	1.08369	1.95794	1.35362	0.602533	0.404821	0.557496
FBgn0260000	93.5257	75.0953	41.1639	13.1255	19.7055	15.0933	69.9283	15.9748	2.13101	1.50991e-06	1.2985e-05	CG17570	2L	20263419	20264424	-	1006	protein_coding	-	-	98	72	42	14	20	14	4.76283	3.69684	2.0697	0.686921	1.04391	0.805063
FBgn0260482	63.9411	85.5252	64.6862	2.8126	12.8085	26.9524	71.3841	14.1912	2.34851	7.10128e-06	5.25317e-05	CG32599	X	14243686	14246514	+	1233	protein_coding	-	-	67	82	66	3	13	25	2.65674	3.43516	2.65361	0.120098	0.553619	1.17294
FBgn0260763	2.86303	34.4187	13.7213	0.937535	0	4.31238	17.001	1.74997	3.31358	0.00352645	0.011384	CG42561	2R	17684855	17685548	+	566	protein_coding	-	-	3	33	14	1	0	4	0.259144	3.01158	1.22622	0.0872088	0	0.408831
FBgn0261575	3379.33	2264.33	2985.37	431.266	399.035	1206.39	2876.34	678.897	2.08328	0.000128904	0.000674772	tobi	3R	25344761	25346921	-	2104	protein_coding	-	Glyco_hydro_31	3541	2171	3046	460	405	1119	82.2843	53.2979	71.7696	10.7917	10.1074	30.7669
FBgn0261714	426.592	560.086	592.957	150.943	182.275	198.37	526.545	177.196	1.5726	3.61929e-16	1.43302e-14	Cpn	3R	12162887	12166186	-	2853	protein_coding	-	-	447	537	605	161	185	184	7.66025	9.7223	10.5126	2.78548	3.40487	3.73092
FBgn0261856	66.8041	75.0953	63.7061	22.5008	27.5876	14.0152	68.5352	21.3679	1.67484	1.63312e-05	0.000110679	CR42785	2R	7000154	7001696	+	450	pseudogene	-	-	70	72	65	24	28	13	7.60541	8.26449	7.16073	2.63254	3.2672	1.67121
FBgn0261928	509.62	689.416	604.718	220.321	181.29	178.964	601.251	193.525	1.63364	1.95914e-19	1.1734e-17	CG42795	3R	10225690	10251277	+	11033	protein_coding	-	TBC	534	661	617	235	184	166	2.36638	3.0946	2.77235	1.05136	0.875699	0.870391
FBgn0262007	868.453	1197.35	787.015	210.945	147.791	160.636	950.94	173.124	2.45568	2.58936e-34	5.7645e-32	CG42825	3L	10095754	10098115	-	1752	protein_coding	-	Sugar_tr	910	1148	803	225	150	149	25.3948	33.8457	22.7216	6.33906	4.4956	4.91985
FBgn0262599	34.3564	78.2242	38.2237	11.2504	17.7349	20.4838	50.2681	16.4897	1.61107	0.000999093	0.00388412	CG43129	2L	10850141	10854604	+	2417	protein_coding	-	-	36	75	39	12	18	19	0.72822	1.60281	0.799916	0.245065	0.391045	0.454754
FBgn0262816	41.9911	51.1065	35.2834	3.75014	12.8085	11.859	42.7937	9.47258	2.18546	5.07936e-05	0.000297908	CG43187	2R	16380516	16385765	+	5093	protein_coding	-	-	44	49	36	4	13	11	0.422392	0.496957	0.350417	0.0387671	0.134029	0.124945
FBgn0263080	109.75	217.985	77.4274	11.2504	22.6613	7.54667	135.054	13.8195	3.28147	8.60847e-13	2.12492e-11	CG43348	2L	1199412	1199924	+	513	protein_coding	-	-	115	209	79	12	23	7	10.9602	21.0439	7.63425	1.15462	2.35419	0.78937
FBgn0263081	1240.65	2020.27	933.049	341.263	491.651	250.118	1397.99	361.011	1.95291	7.24263e-06	5.34433e-05	CG43349	2L	1200205	1200663	+	459	protein_coding	-	-	1300	1937	952	364	499	232	138.474	217.978	102.821	39.144	57.0845	29.2398
FBgn0263116	81.1193	85.5252	102.91	29.0636	18.7202	23.7181	89.8514	23.834	1.91238	4.74875e-08	5.55858e-07	5-HT1B	2R	19022325	19032642	-	4026	protein_coding	-	7tm_1	85	82	105	31	19	22	1.03224	1.05205	1.29292	0.380071	0.247805	0.316118
FBgn0263200	2141.55	2641.89	2446.31	645.024	852.261	851.695	2409.92	782.993	1.62241	3.3533e-27	4.44557e-25	Galt	2L	6666264	6668033	-	1484	protein_coding	-	-	2244	2533	2496	688	865	790	73.9309	88.1653	83.381	22.884	30.6064	30.7959
FBgn0263234	802.603	1029.43	844.841	112.504	251.244	182.198	892.292	181.982	2.29473	4.43586e-23	3.79266e-21	Phae1	2L	12109417	12110664	+	1248	protein_coding	-	Trypsin	841	987	862	120	255	169	32.9472	40.8506	34.2412	4.74617	10.7289	7.83379
FBgn0263235	690.945	780.156	641.962	120.004	153.703	131.528	704.354	135.078	2.38268	2.57188e-42	1.16714e-39	Phae2	2L	12111110	12112256	+	1147	protein_coding	-	Trypsin	724	748	655	128	156	122	30.8612	33.6848	28.3096	5.50837	7.14154	6.15313
FBgn0263239	36.2651	43.8056	19.6019	15.9381	8.86745	6.46857	33.2242	10.4247	1.6609	0.00401312	0.0127321	dar1	3L	3626352	3653442	+	3526	protein_coding	-	-	38	42	20	17	9	6	0.526912	0.615267	0.281193	0.237982	0.134027	0.0984393
FBgn0263316	896.129	1177.54	901.686	296.261	284.744	249.04	991.784	276.682	1.84039	1.24948e-28	1.86616e-26	Mrp4	3R	11569250	11575937	+	4726	protein_coding	-	ABC_membrane	939	1129	920	316	289	231	9.71424	12.3395	9.65052	3.30043	3.21096	2.8276
FBgn0263330	37.2194	57.3644	52.9251	24.3759	11.8233	4.31238	49.1696	13.5039	1.84831	0.000569902	0.002411	CR43411	2L	14613258	14613621	+	364	lincRNA	-	-	39	55	54	26	12	4	5.23842	7.80473	7.35443	3.52573	1.73105	0.635709
FBgn0263402	40.0825	89.6971	50.9649	18.7507	14.7791	5.39048	60.2482	12.9734	2.20068	1.50655e-05	0.000102869	CG43448	3R	30237094	30237734	-	529	protein_coding	-	-	42	86	52	20	15	5	3.88178	8.39729	4.87309	1.86617	1.4889	0.546782
FBgn0263846	169.873	210.684	226.402	82.5031	54.19	64.6857	202.32	67.1263	1.58928	3.64148e-10	6.17326e-09	CG43707	2L	3757256	3769525	+	8942	protein_coding	-	PH	178	202	231	88	55	60	0.973245	1.16684	1.28066	0.485763	0.322967	0.388165
FBgn0264272	176.554	213.813	241.103	52.5019	63.0574	88.4038	210.49	67.9877	1.6352	3.60373e-10	6.11805e-09	mwh	3L	1200786	1232700	+	4747	protein_coding	-	-	185	205	246	56	64	82	1.90541	2.23065	2.56905	0.582298	0.707932	0.999297
FBgn0264295	36.2651	37.5476	10.781	6.56274	1.97055	3.23429	28.1979	3.92252	2.83364	0.000190986	0.000943653	CG43773	2L	4007690	4007984	+	295	protein_coding	-	-	38	36	11	7	2	3	6.29794	6.30343	1.84853	1.17126	0.355991	0.5883
FBgn0264775	321.614	458.916	331.272	36.5639	85.7187	47.4362	370.6	56.5729	2.71153	6.42272e-22	4.92089e-20	CG44013	3R	15508896	15509917	-	940	protein_coding	-	-	337	440	338	39	87	44	17.5283	24.178	17.8257	2.04792	4.85984	2.70785
FBgn0264907	448.542	559.043	411.639	154.693	168.482	98.1067	473.075	140.427	1.7489	2.50613e-15	8.72267e-14	CG44098	3R	4750409	4773197	-	4907	protein_coding	-	MFS_1	470	536	420	165	171	91	4.68294	5.64216	4.24316	1.65976	1.82983	1.07282
FBgn0264994	41.9911	42.7626	47.0445	1.87507	0	5.39048	43.9327	2.42185	4.22367	7.24342e-09	9.82357e-08	CR44145	2L	11736402	11737541	+	1071	lincRNA	-	-	44	41	48	2	0	5	2.00863	1.97738	2.22182	0.0921758	0	0.270072
FBgn0264997	23.8586	23.9888	20.582	4.68767	5.91164	3.23429	22.8098	4.6112	2.29954	0.000806903	0.00324937	CR44148	2L	7684482	7685341	-	559	lincRNA	-	-	25	23	21	5	6	3	2.18658	2.12526	1.86236	0.441504	0.563599	0.310463
FBgn0265081	38.1738	49.0205	42.144	10.3129	8.86745	6.46857	43.1128	8.54964	2.32565	5.40414e-06	4.12175e-05	CR44192	3R	10052846	10054298	-	1156	lincRNA	-	-	40	47	43	11	9	6	1.69176	2.10008	1.84403	0.46969	0.408804	0.300257
FBgn0265084	20.9956	33.3757	24.5024	12.188	0.985273	2.15619	26.2912	5.1098	2.33987	0.00222382	0.00771731	CG44195	3L	7658409	7695654	-	6153	protein_coding	-	-	22	32	25	13	1	2	0.174813	0.268633	0.201423	0.104288	0.00853382	0.0188037
FBgn0265185	3029.09	3742.25	2343.4	572.834	1122.23	785.932	3038.25	826.997	1.87739	5.73525e-18	2.87958e-16	CG44250	2R	12950404	12952293	-	1100	protein_coding	-	-	3174	3588	2391	611	1139	729	141.075	168.483	107.756	27.4173	54.3703	38.3385
FBgn0265186	512.483	614.321	416.54	80.628	261.097	103.497	514.448	148.407	1.79331	0.000838626	0.00335784	CG44251	2R	12948348	12952293	-	1917	protein_coding	-	-	537	589	425	86	265	96	13.6959	15.8705	10.9907	2.21438	7.25863	2.897
FBgn0265416	140.289	201.297	165.636	65.6274	43.352	61.4514	169.074	56.8103	1.57244	8.90695e-09	1.18082e-07	Neto	X	13445903	13527282	+	8256	protein_coding	-	CUB	147	193	169	70	44	57	0.870532	1.20749	1.01478	0.418509	0.279842	0.399397
FBgn0265508	30.539	51.1065	49.9848	13.1255	20.6907	8.62476	43.8768	14.147	1.6263	0.00104252	0.00402641	CR44370	2R	15226938	15232665	+	5545	lincRNA	-	-	32	49	51	14	21	8	0.282154	0.456448	0.455958	0.124624	0.19886	0.0834619
FBgn0265851	23.8586	13.5589	19.6019	2.8126	4.92636	9.70286	19.0065	5.81394	1.72722	0.0174429	0.0428948	CR44640	2R	20302195	20302995	+	801	lincRNA	-	-	25	13	20	3	5	9	1.52596	0.838315	1.23781	0.18487	0.327769	0.649995
FBgn0266137	35.3107	84.4822	62.726	13.1255	18.7202	24.7962	60.8396	18.8806	1.6926	0.000206689	0.00100982	Dop1R2	3R	29630304	29659984	-	5164	protein_coding	-	7tm_1	37	81	64	14	19	23	0.35031	0.810205	0.614399	0.133819	0.193196	0.257657
FBgn0266183	11.4521	11.4729	6.86066	0.937535	2.95582	1.0781	9.92856	1.65715	2.57988	0.0179609	0.0439396	CR44889	X	19712934	19713821	+	832	lincRNA	-	-	12	11	7	1	3	1	0.705172	0.682913	0.417091	0.0593271	0.189334	0.0695307
FBgn0266279	9.54344	14.6019	5.88056	1.87507	1.97055	1.0781	10.0086	1.64124	2.59608	0.0171247	0.0423239	CR44964	X	6746399	6748020	-	1556	lincRNA	-	-	10	14	6	2	2	1	0.314215	0.464745	0.191161	0.0634449	0.0674918	0.0371784
FBgn0266406	13.3608	14.6019	16.6616	0	0	2.15619	14.8748	0.71873	4.45857	0.000545986	0.00232482	CR45046	3R	21878672	21884101	-	5273	lincRNA	-	Aldedh	14	14	17	0	0	2	0.12981	0.137141	0.159826	0	0	0.0219418
FBgn0266430	30.539	27.1177	22.5422	5.62521	6.89691	8.62476	26.733	7.04896	1.92995	0.00137689	0.00512166	CG45060	X	9868068	9868568	-	501	protein_coding	-	-	32	26	23	6	7	8	3.12284	2.6806	2.27587	0.59114	0.733653	0.923745
FBgn0266431	48.6716	42.7626	35.2834	12.188	4.92636	10.781	42.2392	9.29842	2.18355	3.02833e-05	0.000191882	CG45061	X	9871098	9871702	-	493	protein_coding	-	-	51	41	36	13	5	10	5.05778	4.29569	3.62003	1.30159	0.532542	1.17342
FBgn0266450	254.81	357.746	265.605	84.3781	84.7334	105.653	292.72	91.5883	1.67774	1.20446e-13	3.38367e-12	Kr-h1	2L	6082603	6096498	+	5306	protein_coding	-	-	267	343	271	90	86	98	2.46026	3.33905	2.53197	0.837244	0.851063	1.06846
FBgn0266801	268.171	377.562	341.073	132.192	88.6745	113.2	328.935	111.356	1.56117	2.86334e-12	6.66361e-11	CG45263	3R	8364328	8477617	-	13576	protein_coding	-	-	281	362	348	141	90	105	1.01198	1.37731	1.27076	0.512653	0.348098	0.447422
FBgn0266812	1.90869	12.5159	9.80094	0	0.985273	1.0781	8.07517	0.687789	3.58167	0.0166886	0.0414284	CR45274	2R	17584095	17584495	+	401	lincRNA	-	-	2	12	10	0	1	1	0.24385	1.54573	1.23627	0	0.130944	0.144263
FBgn0267089	38.1738	39.6336	52.9251	15.9381	6.89691	7.54667	43.5775	10.1272	2.09509	5.28194e-05	0.000308065	CR45533	X	7445387	7450119	+	4733	lincRNA	-	-	40	38	54	17	7	7	0.4132	0.414709	0.565606	0.177292	0.0776591	0.0855581
FBgn0267337	144.106	103.256	98.0094	44.0641	38.4256	38.8114	115.124	40.4337	1.5092	7.36413e-07	6.82556e-06	rn	3R	7272617	7309629	-	6273	protein_coding	-	-	151	99	100	47	39	36	1.1769	0.815185	0.790281	0.369827	0.326452	0.331992
FBgn0267339	168.919	224.243	101.93	42.1891	68.9691	40.9676	165.031	50.7086	1.70053	3.43193e-07	3.39425e-06	p38c	3R	24149020	24150203	-	1184	protein_coding	-	Pkinase	177	215	104	45	70	38	7.30901	9.37957	4.3545	1.87602	3.10439	1.85666
FBgn0039434	0	0	0	144.38	0	258.743	0	134.374	-9.52451	0.0147873	0.0375298	TwdlM	3R	26619118	26620224	+	1030	protein_coding	-	-	0	0	0	154	0	240	0	0	0	7.38006	0	13.4795
FBgn0051813	0	0	0.980094	195.007	76.8513	121.825	0.326698	131.228	-8.52975	5.31289e-12	1.18725e-10	CG31813	2L	13736138	13737030	+	893	protein_coding	-	-	0	0	1	208	78	113	0	0	0.0555143	11.4971	4.58642	7.32026
FBgn0027527	2.86303	0	0	655.337	152.717	270.602	0.954344	359.552	-8.52583	9.83285e-11	1.81846e-09	Osi6	3R	6234708	6237181	+	1846	protein_coding	-	-	3	0	0	699	155	251	0.079456	0	0	18.6905	4.4089	7.86578
FBgn0043576	0.954344	0	1.96019	343.138	313.317	399.973	0.971511	352.143	-8.47314	6.07216e-23	5.15435e-21	PGRP-SC1a	2R	8709733	8710320	+	588	protein_coding	-	-	1	0	2	366	318	371	0.0831495	0	0.16862	30.7242	28.3975	36.5003
FBgn0036717	0	0	0	50.6269	1.97055	122.903	0	58.5001	-8.32462	0.000508685	0.00218492	CG13731	3L	17383636	17388956	-	2980	protein_coding	-	-	0	0	0	54	2	114	0	0	0	0.894446	0.0352407	2.21304
FBgn0037424	0.954344	0	0	250.322	21.676	39.8895	0.318115	103.962	-8.19312	5.1272e-06	3.93341e-05	Osi15	3R	6301804	6303653	+	1232	protein_coding	-	-	1	0	0	267	22	37	0.039685	0	0	10.6974	0.937654	1.73736
FBgn0033721	0	0	0	91.8784	23.6465	44.2019	0	53.2423	-8.191	3.47954e-10	5.93282e-09	CG13159	2R	12375286	12375678	+	393	protein_coding	-	-	0	0	0	98	24	41	0	0	0	12.3086	3.20663	6.03519
FBgn0033275	0	0	0	93.7535	27.5876	33.421	0	51.5874	-8.14625	4.88505e-10	8.08396e-09	CG14756	2R	8204888	8205706	-	819	protein_coding	-	-	0	0	0	100	28	31	0	0	0	6.02688	1.79517	2.18966
FBgn0037992	0	0	0	72.1902	48.2784	23.7181	0	48.0622	-8.04458	5.56763e-10	9.12395e-09	CG4702	3R	12121583	12128201	-	1459	protein_coding	-	-	0	0	0	77	49	22	0	0	0	2.60503	1.76348	0.872303
FBgn0034204	0	0	0	32.8137	0.985273	107.81	0	47.2028	-8.01498	0.00187627	0.00670853	CG10953	2R	17165084	17166643	-	1489	protein_coding	-	-	0	0	0	35	1	100	0	0	0	1.16025	0.0352644	3.88513
FBgn0000278	0	0	0	17.8132	109.365	3.23429	0	43.4709	-7.89674	0.000694204	0.00286295	CecB	3R	30213315	30213797	-	425	protein_coding	-	-	0	0	0	19	111	3	0	0	0	2.20669	13.714	0.40835
FBgn0037430	0	0	0	102.191	5.91164	16.1714	0	41.4248	-7.82761	0.000258844	0.00122458	Osi20	3R	6340095	6341424	+	1264	protein_coding	-	-	0	0	0	109	6	15	0	0	0	4.25653	0.24925	0.686505
FBgn0029807	0	0	0	79.6905	12.8085	18.3276	0	36.9422	-7.66511	3.15428e-08	3.80546e-07	CG3108	X	5777195	5781620	-	3578	protein_coding	-	-	0	0	0	85	13	17	0	0	0	1.17261	0.19078	0.274858
FBgn0033720	0	0	0	26.251	36.4551	38.8114	0	33.8392	-7.53374	7.28736e-09	9.87182e-08	CG13160	2R	12371594	12375081	+	2736	protein_coding	-	-	0	0	0	28	37	36	0	0	0	0.505148	0.710095	0.761178
FBgn0037414	1.90869	3.12897	0	591.584	110.351	194.057	1.67922	298.664	-7.48632	7.31892e-11	1.37949e-09	Osi7	3R	6248994	6251683	+	2690	protein_coding	-	-	2	3	0	631	112	180	0.0363509	0.0576057	0	11.5785	2.18623	3.87097
FBgn0035621	0	1.04299	0	42.1891	77.8365	62.5295	0.347663	60.8517	-7.41908	3.62751e-09	5.188e-08	CG10591	3L	5598557	5599692	-	1075	protein_coding	-	-	0	1	0	45	79	58	0	0.0480494	0	2.06624	3.85877	3.12118
FBgn0001254	0	0	1.96019	112.504	130.056	89.4819	0.653396	110.681	-7.38975	5.49894e-12	1.22188e-10	ImpE2	3L	3510974	3512681	-	1708	protein_coding	-	-	0	0	2	120	132	83	0	0	0.0580495	3.46793	4.05804	2.81119
FBgn0040984	0	0	0	27.1885	25.6171	18.3276	0	23.7111	-7.02377	1.92399e-07	2.00541e-06	CG4440	2L	16329925	16330521	+	538	protein_coding	-	-	0	0	0	29	26	17	0	0	0	2.66068	2.53759	1.82796
FBgn0037428	0	0	0	55.3145	0.985273	12.9371	0	23.079	-6.98373	0.00425983	0.0134261	Osi18	3R	6330248	6331809	+	1270	protein_coding	-	-	0	0	0	59	1	12	0	0	0	2.29311	0.0413454	0.54661
FBgn0030390	0	0	0.980094	91.8784	2.95582	37.7333	0.326698	44.1892	-6.95882	0.000275293	0.00129358	CG15731	X	12456409	12457763	-	1180	protein_coding	-	-	0	0	1	98	3	35	0	0	0.0420121	4.0994	0.133496	1.71588
FBgn0034301	0	0	0	44.0641	1.97055	18.3276	0	21.4541	-6.87989	5.38262e-06	4.11065e-05	CG5756	2R	18101061	18108389	-	4100	protein_coding	-	CBM_14	0	0	0	47	2	17	0	0	0	0.565836	0.025614	0.239864
FBgn0034783	2.86303	0	0	142.505	109.365	67.92	0.954344	106.597	-6.75577	1.61054e-13	4.45029e-12	CG9825	2R	22837361	22839291	+	1543	protein_coding	-	MFS_1	3	0	0	152	111	63	0.0950588	0	0	4.86244	3.77735	2.36197
FBgn0000279	2.86303	0	0	33.7513	247.303	23.7181	0.954344	101.591	-6.71402	0.000171962	0.000864497	CecC	3R	30216484	30216938	+	386	protein_coding	-	-	3	0	0	36	251	22	0.379989	0	0	4.60354	34.1442	3.29712
FBgn0037224	0.954344	0	0.980094	175.319	0.985273	26.9524	0.644813	67.7522	-6.70093	0.000960705	0.0037659	TwdlF	3R	4247020	4248313	+	1235	protein_coding	-	-	1	0	1	187	1	25	0.0395886	0	0.0401411	7.47397	0.0425171	1.17104
FBgn0035429	0	0	0	22.5008	16.7496	16.1714	0	18.474	-6.66336	1.66301e-06	1.42291e-05	CG12017	3L	3280239	3290896	+	2667	protein_coding	-	-	0	0	0	24	17	15	0	0	0	0.444186	0.334701	0.325363
FBgn0036612	0	0	0	22.5008	2.95582	28.0305	0	17.829	-6.60903	9.8679e-06	7.05217e-05	CG4998	3L	16339003	16345241	+	4192	protein_coding	-	Trypsin	0	0	0	24	3	26	0	0	0	0.282596	0.0375777	0.3588
FBgn0035257	0	2.08598	0	43.1266	64.0427	87.3257	0.695327	64.8317	-6.60805	2.59356e-09	3.80615e-08	CG12011	3L	1694617	1696412	+	1724	protein_coding	-	-	0	2	0	46	65	81	0	0.0599224	0	1.31703	1.97973	2.71799
FBgn0040279	0.954344	0	0	59.0647	14.7791	28.0305	0.318115	33.9581	-6.58079	9.55656e-07	8.61405e-06	Osi14	3R	6299128	6300738	+	1091	protein_coding	-	-	1	0	0	63	15	26	0.0448139	0	0	2.85031	0.721933	1.37863
FBgn0000276	2.86303	4.17196	2.94028	230.634	576.384	74.3886	3.32509	293.802	-6.46897	1.50715e-11	3.15298e-10	CecA1	3R	30210874	30211273	+	339	protein_coding	-	-	3	4	3	246	585	69	0.432672	0.609476	0.438711	35.8189	90.6122	11.7747
FBgn0004240	23.8586	40.6766	18.6218	1787.88	4565.75	788.088	27.719	2380.57	-6.42563	2.54287e-17	1.19535e-15	Dpt	2R	18865765	18866260	+	496	protein_coding	-	-	25	39	19	1907	4634	731	2.46431	4.06143	1.89902	189.778	490.575	85.2581
FBgn0011653	0	0	0	6.56274	17.7349	20.4838	0	14.9272	-6.35106	1.50321e-05	0.00010276	mas	3L	4161666	4167464	-	3657	protein_coding	-	Trypsin	0	0	0	7	18	19	0	0	0	0.0944821	0.258451	0.300558
FBgn0066365	0.954344	2.08598	0	120.004	14.7791	56.061	1.01344	63.6148	-5.99906	6.25606e-09	8.57321e-08	dyl	3L	4294004	4307718	-	3139	protein_coding	-	Zona_pellucida	1	2	0	128	15	52	0.0155756	0.0329105	0	2.01278	0.250917	0.958323
FBgn0265011	0	0	0	7.50028	5.91164	20.4838	0	11.2986	-5.94767	0.000128386	0.000672358	Np	2R	8992945	9006587	-	4195	protein_coding	-	Trypsin	0	0	0	8	6	19	0	0	0	0.0941314	0.0751017	0.262012
FBgn0039472	1.90869	17.7308	11.7611	701.276	620.722	468.972	10.4669	596.99	-5.84179	6.76996e-18	3.37041e-16	CG17192	3R	27017180	27018287	-	1052	protein_coding	-	Lipase	2	17	12	748	630	435	0.0929504	0.834698	0.565486	35.0964	31.4453	23.9207
FBgn0035737	0	0	0	13.1255	0.985273	17.2495	0	10.4534	-5.83836	0.000445825	0.00195026	Cpr65Ec	3L	7093204	7093841	+	566	protein_coding	-	Chitin_bind_4	0	0	0	14	1	16	0	0	0	1.22092	0.0927714	1.63532
FBgn0035430	0	0	0.980094	39.3765	11.8233	8.62476	0.326698	19.9415	-5.81522	4.88289e-05	0.00028821	CG12009	3L	3291459	3299000	+	3565	protein_coding	-	CBM_14	0	0	1	42	12	8	0	0	0.0139058	0.581522	0.176747	0.129817
FBgn0040809	0	0	0	10.3129	6.89691	12.9371	0	10.049	-5.78201	0.000192631	0.000950191	CG13465	3L	14943730	14944331	-	602	protein_coding	-	-	0	0	0	11	7	12	0	0	0	0.90193	0.610565	1.15315
FBgn0266405	3.81738	0	0	42.1891	144.835	25.8743	1.27246	70.9661	-5.78128	0.000170292	0.000856834	CR45045	3R	17667577	17667825	+	249	lincRNA	-	-	4	0	0	45	147	24	0.785412	0	0	8.92051	30.9991	5.57586
FBgn0050043	0.954344	1.04299	4.90047	120.004	137.938	102.419	2.29927	120.121	-5.70056	1.42448e-19	8.84604e-18	CG30043	2R	12359436	12363165	+	3082	protein_coding	-	-	1	1	5	128	140	95	0.0158637	0.0167596	0.0804255	2.05	2.38521	1.78316
FBgn0086519	0	0	0	4.68767	2.95582	20.4838	0	9.37577	-5.67697	0.000654237	0.00272383	Cpr47Eg	2R	11277957	11278445	-	421	protein_coding	-	Chitin_bind_4	0	0	0	5	3	19	0	0	0	0.586225	0.374171	2.61079
FBgn0052185	0	1.04299	0.980094	9.37535	87.6893	4.31238	0.674361	33.7923	-5.66966	2.54653e-05	0.000163741	edin	3L	17494880	17495300	+	421	protein_coding	-	-	0	1	1	10	89	4	0	0.122691	0.117754	1.17245	11.1004	0.549639
FBgn0003065	0	1.04299	0	30.9386	0.985273	18.3276	0.347663	16.7505	-5.56012	0.000331129	0.00152201	CG2150	3R	31763304	31764772	-	1170	protein_coding	-	-	0	1	0	33	1	17	0	0.0441479	0	1.39221	0.0448792	0.840549
FBgn0044049	0	0	0	11.2504	5.91164	7.54667	0	8.23624	-5.49811	0.000693565	0.00286132	Ilp4	3L	9803399	9804263	-	804	protein_coding	-	-	0	0	0	12	6	7	0	0	0	0.736719	0.391855	0.503665
FBgn0036600	0	0	0	4.68767	0.985273	18.3276	0	8.00019	-5.4483	0.00214008	0.00747287	CG13043	3L	16305225	16305870	-	646	protein_coding	-	-	0	0	0	5	1	17	0	0	0	0.382045	0.0812827	1.52236
FBgn0030459	0	0	0	16.8756	4.92636	1.0781	0	7.62669	-5.39204	0.00242337	0.00828313	CG12723	X	13189643	13191883	-	2113	protein_coding	-	-	0	0	0	18	5	1	0	0	0	0.420484	0.124251	0.0273779
FBgn0040842	0	1.04299	0	30.0011	0	14.0152	0.347663	14.6721	-5.36958	0.00111367	0.0042649	CG15212	3L	5131545	5132127	+	445	protein_coding	-	-	0	1	0	32	0	13	0	0.116074	0	3.54949	0	1.68999
FBgn0051002	0	0	0	15.0006	1.97055	5.39048	0	7.45386	-5.35639	0.00206443	0.00725164	CG31002	3R	31393582	31395304	-	1663	protein_coding	-	UDPGT	0	0	0	16	2	5	0	0	0	0.474902	0.0631493	0.173931
FBgn0035887	4.77172	1.04299	2.94028	79.6905	107.395	164.949	2.91833	117.345	-5.30583	1.03767e-18	5.66828e-17	Jon66Cii	3L	8392820	8393649	-	830	protein_coding	-	Trypsin	5	1	3	85	109	153	0.29453	0.0622326	0.179184	5.05496	6.89571	10.6638
FBgn0037068	0	0	0	7.50028	1.97055	11.859	0	7.10996	-5.28119	0.00233385	0.00804238	Cpr78Cb	3L	21294492	21296698	+	2124	protein_coding	-	Chitin_bind_4	0	0	0	8	2	11	0	0	0	0.185914	0.0494431	0.299597
FBgn0020377	0	0	0	3.75014	10.838	6.46857	0	7.0189	-5.26492	0.00196545	0.00697035	Sr-CII	2R	12208893	12212155	-	2369	protein_coding	-	Somatomedin_B	0	0	0	4	11	6	0	0	0	0.0833435	0.243814	0.146516
FBgn0050413	1.90869	0	0	56.2521	7.88218	8.62476	0.636229	24.253	-5.21593	9.72243e-05	0.000523812	CG30413	2R	23329543	23330068	-	526	protein_coding	-	-	2	0	0	60	8	8	0.185901	0	0	5.63044	0.79861	0.879841
FBgn0035886	36.2651	27.1177	62.726	1040.66	1584.32	2042.99	42.0363	1555.99	-5.20857	1.11278e-31	2.08407e-29	Jon66Ci	3L	8391540	8392377	+	838	protein_coding	-	Trypsin	38	26	64	1110	1608	1895	2.21706	1.6026	3.7861	65.3816	100.756	130.817
FBgn0037177	0	0	0	10.3129	0	9.70286	0	6.67191	-5.19202	0.00707412	0.0204227	CG14454	3L	22691674	22692528	-	855	protein_coding	-	-	0	0	0	11	0	9	0	0	0	0.635043	0	0.608942
FBgn0030340	0	0	0.980094	22.5008	0	16.1714	0.326698	12.8908	-5.18149	0.00184669	0.00661479	CG15740	X	11842662	11846099	-	3265	protein_coding	-	-	0	0	1	24	0	15	0	0	0.0151836	0.362831	0	0.265771
FBgn0036592	0	1.04299	0.980094	42.1891	0	25.8743	0.674361	22.6878	-5.09291	0.000376544	0.00169445	CG13049	3L	16281132	16281930	-	736	protein_coding	-	-	0	1	1	45	0	24	0	0.0701808	0.0673564	3.01794	0	1.8864
FBgn0035875	0	0	0.980094	24.3759	0.985273	10.781	0.326698	12.0474	-5.086	0.00159265	0.00580528	Cpr66Cb	3L	8336672	8338595	+	1001	protein_coding	-	Chitin_bind_4	0	0	1	26	1	10	0	0	0.0495248	1.28208	0.0524562	0.577917
FBgn0035685	0	1.04299	0	18.7507	1.97055	15.0933	0.347663	11.9382	-5.07045	0.00116114	0.00442515	CG13297	3L	6156592	6157377	-	595	protein_coding	-	-	0	1	0	20	2	14	0	0.0868119	0	1.65917	0.1765	1.36117
FBgn0034407	84.9366	84.4822	29.4028	1185.98	4263.27	1025.27	66.2739	2158.17	-5.02539	4.80017e-10	7.96586e-09	DptB	2R	18867391	18867895	+	449	protein_coding	-	-	89	81	30	1265	4327	951	9.69127	9.31826	3.31231	139.066	506.024	122.528
FBgn0051626	0	1.04299	0	21.5633	0	12.9371	0.347663	11.5001	-5.01751	0.00303469	0.0100523	CG31626	2L	21232495	21236733	-	1363	protein_coding	-	-	0	1	0	23	0	12	0	0.0378966	0	0.83293	0	0.509313
FBgn0002629	0	0	0	0.937535	6.89691	9.70286	0	5.84577	-4.99663	0.00710168	0.0204872	E(spl)m4-BFM	3R	26023821	26024579	-	759	protein_coding	-	-	0	0	0	1	7	9	0	0	0	0.0650332	0.484269	0.685963
FBgn0034514	1.90869	0	0	17.8132	18.7202	24.7962	0.636229	20.4432	-4.95913	5.92053e-05	0.000341095	CG13427	2R	20538877	20539316	-	440	protein_coding	-	-	2	0	0	19	19	23	0.222236	0	0	2.13146	2.26742	3.02395
FBgn0034782	0	0	0	1.87507	11.8233	3.23429	0	5.64421	-4.95173	0.00771939	0.0219367	CG12490	2R	22834647	22836701	+	1647	protein_coding	-	MFS_1	0	0	0	2	12	3	0	0	0	0.0599395	0.382576	0.105373
FBgn0029836	0	0	0	8.43781	3.94109	4.31238	0	5.56376	-4.9334	0.00607717	0.0180253	CG5928	X	6067958	6069264	+	1239	protein_coding	-	-	0	0	0	9	4	4	0	0	0	0.358548	0.169519	0.186762
FBgn0040296	0	0	0	2.8126	6.89691	6.46857	0	5.39269	-4.88306	0.00719486	0.0207256	Ocho	3L	14974848	14976040	+	1193	protein_coding	-	-	0	0	0	3	7	6	0	0	0	0.124124	0.308098	0.290945
FBgn0036952	1.90869	0	0	11.2504	22.6613	21.5619	0.636229	18.4912	-4.8152	0.000144226	0.000744412	CG6933	3L	20218500	20220420	-	1415	protein_coding	-	CBM_14	2	0	0	12	23	20	0.0691052	0	0	0.418602	0.853497	0.817661
FBgn0038339	0.954344	2.08598	1.96019	58.1272	36.4551	44.2019	1.66684	46.2614	-4.80615	1.44505e-09	2.20857e-08	CG6118	3R	15421108	15434738	-	4659	protein_coding	-	BTB	1	2	2	62	37	41	0.0104941	0.0221735	0.0212811	0.656864	0.417003	0.509086
FBgn0035208	1.90869	10.4299	1.96019	33.7513	184.246	175.73	4.76626	131.242	-4.79333	3.67519e-06	2.89863e-05	CG9184	3L	1321792	1322806	-	966	protein_coding	-	-	2	10	2	36	187	163	0.101225	0.534711	0.102638	1.83951	10.1647	9.76136
FBgn0010388	40.0825	84.4822	14.7014	683.463	2594.22	573.547	46.422	1283.74	-4.79032	2.62275e-07	2.64947e-06	Dro	2R	14745961	14746714	+	754	protein_coding	-	-	42	81	15	729	2633	532	2.72342	5.54894	0.986226	47.7236	183.362	40.8169
FBgn0042187	0	0	0	5.62521	6.89691	2.15619	0	4.89277	-4.74872	0.0114617	0.0305964	CG17234	2L	2253045	2253852	+	808	protein_coding	-	Trypsin	0	0	0	6	7	2	0	0	0	0.366536	0.454901	0.143192
FBgn0035315	0	1.04299	0	4.68767	5.91164	17.2495	0.347663	9.28295	-4.70113	0.00298551	0.00991166	CG8960	3L	2197013	2198089	+	1042	protein_coding	-	-	0	1	0	5	6	16	0	0.0495711	0	0.236853	0.302353	0.888284
FBgn0002632	0	0	0	2.8126	7.88218	3.23429	0	4.64302	-4.67017	0.0143506	0.036664	E(spl)m6-BFM	3R	26032911	26034047	+	1137	protein_coding	-	-	0	0	0	3	8	3	0	0	0	0.130238	0.369454	0.152637
FBgn0033327	31.4934	23.9888	31.363	470.642	859.158	785.932	28.9484	705.244	-4.60296	2.66643e-65	3.14612e-62	PGRP-SC1b	2R	8713446	8715094	+	1649	protein_coding	-	-	33	23	32	502	872	729	0.978431	0.720449	0.962024	15.0266	27.7668	25.5745
FBgn0020639	0	1.04299	0	15.0006	0	10.781	0.347663	8.59384	-4.59661	0.00924796	0.0256624	Lcp65Af	3L	6136215	6136791	-	519	protein_coding	-	Chitin_bind_4	0	1	0	16	0	10	0	0.0995243	0	1.5217	0	1.11463
FBgn0038941	0	1.04299	0	23.4384	0.985273	1.0781	0.347663	8.50058	-4.587	0.0108003	0.0291143	CG7080	3R	22329300	22330546	+	1178	protein_coding	-	-	0	1	0	25	1	1	0	0.0438481	0	1.04754	0.0445744	0.0491083
FBgn0264905	0	0	0	1.87507	5.91164	5.39048	0	4.39239	-4.58666	0.0180287	0.0440871	CR44096	3R	21720967	21723234	+	546	lincRNA	-	-	0	0	0	2	6	5	0	0	0	0.180806	0.577018	0.529758
FBgn0037099	0	1.04299	1.96019	45.9392	16.7496	7.54667	1.00106	23.4118	-4.56265	5.83888e-05	0.000336885	CG7173	3L	21555373	21558226	-	2439	protein_coding	-	-	0	1	2	49	17	7	0	0.021178	0.0406513	0.991656	0.365989	0.16603
FBgn0028537	0	0	0	4.68767	5.91164	2.15619	0	4.25183	-4.54571	0.0197416	0.0475522	CG31775	2L	14737090	14737769	-	613	protein_coding	-	-	0	0	0	5	6	2	0	0	0	0.402611	0.513951	0.188742
FBgn0052405	0	0	0.980094	14.063	0	10.781	0.326698	8.28133	-4.54289	0.0105786	0.0286475	Cpr65Av	3L	6139223	6139974	-	642	protein_coding	-	Chitin_bind_4	0	0	1	15	0	10	0	0	0.0772185	1.15327	0	0.901083
FBgn0264541	1.90869	4.17196	3.92038	41.2515	173.408	16.1714	3.33367	76.9436	-4.53643	5.37392e-09	7.44212e-08	CG43920	2R	17598845	17599253	-	409	protein_coding	-	-	2	4	4	44	176	15	0.23908	0.505165	0.484834	5.31014	22.5954	2.12162
FBgn0052453	0	0	0.980094	9.37535	0	14.0152	0.326698	7.79686	-4.45284	0.0132359	0.034376	CG32453	3L	22697230	22697970	+	741	protein_coding	-	-	0	0	1	10	0	13	0	0	0.0669019	0.666129	0	1.0149
FBgn0003448	0	0	0.980094	6.56274	4.92636	11.859	0.326698	7.78272	-4.44934	0.00568757	0.017041	sna	2L	15476593	15478260	-	1668	protein_coding	-	zf-C2H2	0	0	1	7	5	11	0	0	0.0297208	0.207147	0.1574	0.381502
FBgn0260954	0	0	1.96019	14.063	15.7644	12.9371	0.653396	14.2548	-4.43507	0.000680674	0.00281503	CG42586	2L	14741161	14741840	-	613	protein_coding	-	-	0	0	2	15	16	12	0	0	0.161743	1.20783	1.37053	1.13245
FBgn0037083	0.954344	0	0	8.43781	6.89691	7.54667	0.318115	7.62713	-4.42435	0.00559972	0.016826	CG5656	3L	21442227	21444819	-	1806	protein_coding	-	-	1	0	0	9	7	7	0.0270719	0	0	0.245981	0.203522	0.224223
FBgn0038479	0.954344	2.08598	0	17.8132	24.6318	21.5619	1.01344	21.3356	-4.42039	3.06323e-05	0.000193797	CG17477	3R	17126088	17126938	-	851	protein_coding	-	Trypsin	1	2	0	19	25	20	0.0574523	0.121394	0	1.10205	1.54256	1.35957
FBgn0037416	2.86303	0	2.94028	100.316	18.7202	6.46857	1.93444	41.835	-4.41911	7.37326e-06	5.43053e-05	Osi9	3R	6260211	6262105	+	1360	protein_coding	-	-	3	0	3	107	19	6	0.10785	0	0.109355	3.88348	0.733576	0.255218
FBgn0036607	0	1.04299	0.980094	14.063	0	28.0305	0.674361	14.0312	-4.39413	0.00364951	0.0117363	CG13059	3L	16323672	16324308	+	572	protein_coding	-	-	0	1	1	15	0	26	0	0.0903026	0.0866684	1.29441	0	2.62952
FBgn0000071	0	1.04299	4.90047	30.9386	23.6465	66.8419	1.98115	40.4757	-4.34869	2.08852e-07	2.15783e-06	Ama	3R	6762593	6765261	+	1946	protein_coding	-	I-set	0	1	5	33	24	62	0	0.0265432	0.127375	0.837043	0.647588	1.8431
FBgn0035666	1.90869	2.08598	1.96019	34.6888	34.4845	50.6705	1.98495	39.9479	-4.33041	1.36564e-08	1.75144e-07	Jon65Aii	3L	6052321	6053215	+	833	protein_coding	-	Trypsin	2	2	2	37	35	47	0.117388	0.124017	0.119026	2.19247	2.20624	3.26402
FBgn0038487	0	2.08598	3.92038	73.1277	0.985273	39.8895	2.00212	38.0008	-4.24958	0.013726	0.0353377	TwdlW	3R	17141208	17142404	-	1126	protein_coding	-	-	0	2	4	78	1	37	0	0.0917462	0.176108	3.41927	0.0466329	1.90092
FBgn0030098	62.0324	28.1607	24.5024	543.77	996.111	629.608	38.2318	723.163	-4.23617	2.33455e-45	1.14772e-42	CG12057	X	9191657	9192548	+	892	protein_coding	-	-	65	27	25	580	1011	584	3.56275	1.56349	1.38941	32.0952	59.5137	37.8746
FBgn0266702	0.954344	2.08598	1.96019	33.7513	32.514	23.7181	1.66684	29.9944	-4.18101	7.75193e-07	7.1342e-06	CR45192	3R	5835478	5836178	-	649	lincRNA	-	-	1	2	2	36	33	22	0.0753342	0.159177	0.152771	2.73801	2.66993	1.961
FBgn0033590	0.954344	0	0.980094	14.063	0	21.5619	0.644813	11.875	-4.17795	0.00674592	0.0196192	CG13217	2R	11236203	11236686	-	484	protein_coding	-	-	1	0	1	15	0	20	0.101016	0	0.102426	1.52976	0	2.39048
FBgn0036781	0	1.04299	0	8.43781	3.94109	6.46857	0.347663	6.28249	-4.14508	0.0134361	0.0347519	CG13699	3L	18154897	18162522	-	3755	protein_coding	-	-	0	1	0	9	4	6	0	0.0137558	0	0.118307	0.0559346	0.092436
FBgn0026320	0	1.04299	1.96019	2.8126	18.7202	31.2648	1.00106	17.5992	-4.13995	0.000674692	0.00279322	Tom	3L	14969344	14970306	+	963	protein_coding	-	-	0	1	2	3	19	29	0	0.0536377	0.102958	0.15377	1.036	1.74209
FBgn0001256	3.81738	1.04299	2.94028	62.8148	36.4551	38.8114	2.60022	46.0271	-4.13083	3.29355e-09	4.76233e-08	ImpL1	3L	13382765	13383999	+	1235	protein_coding	-	-	4	1	3	67	37	36	0.158354	0.0418244	0.120423	2.67784	1.57313	1.6863
FBgn0262609	0.954344	0	0	7.50028	8.86745	2.15619	0.318115	6.17464	-4.12368	0.0161665	0.04037	CG43135	X	4248377	4248657	+	218	protein_coding	-	-	1	0	0	8	9	2	0.224275	0	0	1.81138	2.16779	0.53073
FBgn0052266	0	0	0.980094	4.68767	0.985273	12.9371	0.326698	6.20336	-4.11944	0.0206772	0.0493967	CG32266	3L	3790804	3791560	+	526	protein_coding	-	-	0	0	1	5	1	12	0	0	0.0942477	0.469203	0.0998263	1.31976
FBgn0003254	4.77172	2.08598	0.980094	44.0641	29.5582	63.6076	2.6126	45.7433	-4.11645	8.28719e-09	1.10988e-07	rib	2R	19270078	19281396	+	4665	protein_coding	-	BTB	5	2	1	47	30	59	0.0524029	0.0221449	0.0106269	0.497305	0.337676	0.731645
FBgn0039852	0	2.08598	0.980094	21.5633	12.8085	16.1714	1.02202	16.8478	-4.07658	0.000246178	0.00117455	nyo	3R	31543032	31566165	+	3812	protein_coding	-	PAN_1	0	2	1	23	13	15	0	0.0271003	0.0130048	0.297818	0.179069	0.227635
FBgn0030107	0	0	0.980094	9.37535	5.91164	2.15619	0.326698	5.81439	-4.03811	0.0201507	0.0483345	CG15370	X	9225437	9226688	+	1252	protein_coding	-	-	0	0	1	10	6	2	0	0	0.0395961	0.394251	0.251639	0.0924114
FBgn0038132	0	1.04299	0.980094	26.251	2.95582	3.23429	0.674361	10.8137	-4.02871	0.0068816	0.0199565	CG15887	3R	13287655	13288813	-	863	protein_coding	-	-	0	1	1	28	3	3	0	0.0598529	0.0574441	1.60149	0.182533	0.201099
FBgn0037429	2.86303	0	1.96019	57.1896	13.7938	8.62476	1.60774	26.5361	-4.02608	6.94854e-05	0.000391528	Osi19	3R	6335362	6337196	+	1138	protein_coding	-	-	3	0	2	61	14	8	0.128889	0	0.0871253	2.64584	0.645976	0.406675
FBgn0029681	5.72607	1.04299	0.980094	65.6274	27.5876	34.4991	2.58305	42.5714	-4.0234	8.5667e-08	9.52127e-07	CG15239	X	3884168	3890486	+	1997	protein_coding	-	-	6	1	1	70	28	32	0.146896	0.0258653	0.0248244	1.7302	0.736225	0.926983
FBgn0031654	154.604	456.83	301.869	2648.54	6724.48	4935.52	304.434	4769.51	-3.96995	3.24026e-13	8.42863e-12	Jon25Bii	2L	4952243	4953136	-	894	protein_coding	-	Trypsin	162	438	308	2825	6825	4578	8.85961	25.3065	17.0793	155.976	400.863	296.236
FBgn0035736	0	0	1.96019	25.3134	1.97055	3.23429	0.653396	10.1728	-3.95627	0.0115711	0.0308604	Cpr65Eb	3L	7087713	7088787	-	1004	protein_coding	-	Chitin_bind_4	0	0	2	27	2	3	0	0	0.0987536	1.32741	0.104599	0.172857
FBgn0039264	0	0	1.96019	23.4384	3.94109	2.15619	0.653396	9.84522	-3.90949	0.0117468	0.0312125	CG11786	3R	25046323	25047409	+	768	protein_coding	-	-	0	0	2	25	4	2	0	0	0.1291	1.60678	0.273482	0.15065
FBgn0261526	0	0	2.94028	15.0006	7.88218	19.4057	0.980094	14.0962	-3.83328	0.00148557	0.00547072	NT1	3L	4501652	4508433	-	4104	protein_coding	-	-	0	0	3	16	8	18	0	0	0.0362385	0.192437	0.102356	0.253726
FBgn0052499	5.72607	2.08598	0	64.6899	12.8085	34.4991	2.60402	37.3325	-3.83154	5.29967e-06	4.05518e-05	Cda4	X	22583634	22632710	-	1934	protein_coding	-	CBM_14	6	2	0	69	13	32	0.151681	0.0534158	0	1.76104	0.352954	0.957179
FBgn0250833	2.86303	1.04299	0	34.6888	2.95582	17.2495	1.30201	18.298	-3.80267	0.000946348	0.0037212	CG34461	3L	8325859	8328307	+	1873	protein_coding	-	Chitin_bind_4	3	1	0	37	3	16	0.0783106	0.0275777	0	0.975081	0.0841035	0.494176
FBgn0030980	1.90869	0	0	7.50028	1.97055	16.1714	0.636229	8.54742	-3.7084	0.0162135	0.0404617	CG7406	X	19077720	19078592	+	812	protein_coding	-	-	2	0	0	8	2	15	0.120423	0	0	0.486307	0.129332	1.06865
FBgn0038028	3.81738	5.21495	0.980094	34.6888	44.3373	38.8114	3.33747	39.2792	-3.56638	9.17882e-08	1.01121e-06	CG10035	3R	12380869	12382691	-	1754	protein_coding	-	-	4	5	1	37	45	36	0.111498	0.147244	0.0282636	1.04123	1.34714	1.18733
FBgn0028938	4.77172	4.17196	3.92038	83.4406	1.97055	61.4514	4.28802	48.9542	-3.51246	3.55542e-05	0.000219406	CG16886	2L	13920707	13923553	-	2433	protein_coding	-	-	5	4	4	89	2	57	0.100477	0.0849208	0.0815032	1.80561	0.0431637	1.35529
FBgn0265577	5.72607	14.6019	3.92038	38.4389	205.922	21.5619	8.08277	88.6409	-3.45912	0.00154516	0.00565838	CR44404	2R	17671068	17671295	+	228	lincRNA	-	-	6	14	4	41	209	20	1.28663	3.17168	0.869725	8.87617	48.1329	5.07452
FBgn0051091	34.3564	42.7626	21.5621	393.765	394.109	287.851	32.8937	358.575	-3.45111	4.18197e-38	1.2985e-35	CG31091	3R	25899903	25902172	+	2149	protein_coding	-	-	36	41	22	420	400	267	0.819036	0.985471	0.507508	9.64694	9.77359	7.18745
FBgn0037323	1.90869	0	1.96019	24.3759	5.91164	11.859	1.28963	14.0489	-3.42685	0.00228996	0.00791774	CG2663	3R	5400594	5404135	-	1645	protein_coding	-	-	2	0	2	26	6	11	0.0594431	0	0.0602727	0.780161	0.191521	0.386836
FBgn0037996	1.90869	4.17196	4.90047	44.0641	46.3078	24.7962	3.66037	38.3894	-3.39955	3.22233e-07	3.20847e-06	CG4830	3R	12208159	12210360	-	1861	protein_coding	-	AMP-binding	2	4	5	47	47	23	0.0525437	0.111022	0.133193	1.2466	1.32612	0.714959
FBgn0020906	448.542	991.883	788.976	4694.24	10635	7961.73	743.134	7763.67	-3.38518	2.09361e-14	6.56981e-13	Jon25Bi	2L	4954279	4955144	-	866	protein_coding	-	Trypsin	470	951	805	5007	10794	7385	26.5349	56.723	46.0823	285.388	654.478	493.324
FBgn0032211	5.72607	9.38691	10.781	122.817	76.8513	64.6857	8.63134	88.118	-3.35793	4.76192e-13	1.21878e-11	CG13138	2L	10299977	10302018	-	1958	protein_coding	-	-	6	9	11	131	78	60	0.149822	0.237425	0.278507	3.30244	2.09176	1.77271
FBgn0262352	1.90869	7.30093	3.92038	62.8148	33.4993	33.421	4.37666	43.245	-3.32278	2.13254e-07	2.20138e-06	CG43050	2L	13119294	13120767	+	1119	protein_coding	-	-	2	7	4	67	34	31	0.087385	0.32312	0.177209	2.95543	1.59544	1.60262
FBgn0033097	1.90869	0	3.92038	20.6258	18.7202	19.4057	1.94302	19.5839	-3.31536	0.000242499	0.00116122	Zip42C.2	2R	6718196	6719533	-	1278	protein_coding	-	-	2	0	4	22	19	18	0.0765132	0	0.155162	0.849705	0.780645	0.814782
FBgn0041581	32.4477	30.2467	40.1839	129.38	828.614	61.4514	34.2928	339.815	-3.30875	0.00151582	0.0055717	AttB	2R	14749223	14750165	+	879	protein_coding	-	-	34	29	41	138	841	57	1.89115	1.70414	2.31234	7.74938	50.2386	3.75133
FBgn0034022	0.954344	5.21495	1.96019	50.6269	0	28.0305	2.70983	26.2191	-3.28854	0.00245055	0.00835666	CG12964	2R	15485953	15497231	-	3942	protein_coding	-	-	1	5	2	54	0	26	0.0124028	0.0655164	0.0251519	0.676167	0	0.381554
FBgn0039851	0.954344	5.21495	6.86066	36.5639	45.3225	38.8114	4.34332	40.2326	-3.22084	3.76124e-07	3.69209e-06	mey	3R	31499235	31506992	+	3385	protein_coding	-	PAN_1	1	5	7	39	46	36	0.0144437	0.076297	0.102517	0.568699	0.713559	0.615239
FBgn0041579	204.23	313.94	129.372	798.78	4253.42	876.492	215.847	1976.23	-3.19481	0.000150342	0.000772934	AttC	2R	13393705	13394667	+	900	protein_coding	-	-	214	301	132	852	4317	813	11.6254	17.2751	7.2709	46.7276	251.866	52.2574
FBgn0004777	3.81738	2.08598	1.96019	15.9381	1.97055	52.8267	2.62118	23.5784	-3.15927	0.00156599	0.00572579	Ccp84Ag	3R	6686728	6688039	+	1097	protein_coding	-	Chitin_bind_4	4	2	2	17	2	49	0.178275	0.0941715	0.0903816	0.764925	0.0957313	2.58398
FBgn0014865	31.4934	98.041	27.4426	349.7	825.658	206.994	52.3257	460.784	-3.13987	8.53468e-05	0.000467505	Mtk	2R	15408846	15409113	+	268	protein_coding	-	-	33	94	28	373	838	192	6.02027	18.1171	5.1794	68.699	164.187	41.4444
FBgn0035006	8.5891	13.5589	17.6417	85.3157	177.349	79.7791	13.2632	114.148	-3.1083	1.1444e-12	2.77832e-11	CG4563	2R	24451084	24453040	-	1766	protein_coding	-	AMP-binding	9	13	18	91	180	74	0.249166	0.380232	0.505287	2.54347	5.35195	2.42405
FBgn0265087	0.954344	1.04299	1.96019	18.7507	10.838	4.31238	1.31917	11.3004	-3.10314	0.00690771	0.0200081	CR44198	2L	13118872	13119288	-	417	lincRNA	-	-	1	1	2	20	11	4	0.117247	0.123868	0.237766	2.36739	1.38512	0.554911
FBgn0035667	361.696	405.723	458.684	2556.66	3651.42	4195.95	408.701	3468.01	-3.08491	4.19477e-66	6.18677e-63	Jon65Ai	3L	6053493	6054443	-	951	protein_coding	-	Trypsin	379	389	468	2727	3706	3892	19.4848	21.1283	24.3962	141.541	204.624	236.751
FBgn0038727	1.90869	3.12897	0	36.5639	1.97055	2.15619	1.67922	13.5635	-3.02962	0.0192199	0.0465277	CG7432	3R	19665007	19670827	+	2921	protein_coding	-	Trypsin	2	3	0	39	2	2	0.0334761	0.0530501	0	0.659037	0.0359525	0.0396094
FBgn0033359	0	3.12897	3.92038	27.1885	13.7938	14.0152	2.34978	18.3325	-2.97895	0.00112372	0.00429643	CG8213	2R	8969346	8985900	-	6637	protein_coding	-	-	0	3	4	29	14	13	0	0.0233478	0.0298775	0.215676	0.110761	0.113311
FBgn0262720	3.81738	10.4299	2.94028	26.251	38.4256	68.9981	5.72919	44.5582	-2.96961	2.57442e-06	2.10503e-05	CG43164	2R	17502354	17508645	+	3471	protein_coding	-	Lectin_C	4	10	3	28	39	64	0.0563433	0.148813	0.0428473	0.398181	0.589985	1.06666
FBgn0037645	1.90869	1.04299	1.96019	13.1255	4.92636	20.4838	1.63729	12.8452	-2.96087	0.00515647	0.0157294	CG11966	3R	8950246	8963037	-	4569	protein_coding	-	-	2	1	2	14	5	19	0.0214016	0.0113051	0.0217003	0.151246	0.0574618	0.240565
FBgn0267009	0.954344	0	2.94028	18.7507	6.89691	4.31238	1.29821	9.98666	-2.9354	0.0176621	0.0433434	CR45453	2L	10870867	10871133	+	267	lincRNA	-	-	1	0	3	20	7	4	0.183116	0	0.557015	3.69739	1.37663	0.866659
FBgn0038481	62.9867	80.3102	51.945	463.142	557.664	440.941	65.0806	487.249	-2.90744	1.33113e-41	5.41588e-39	CG17475	3R	17129339	17130426	-	1088	protein_coding	-	Trypsin	66	77	53	494	566	409	2.96587	3.6556	2.41492	22.4117	27.3161	21.7467
FBgn0036678	1.90869	1.04299	7.84075	19.6882	35.4698	22.64	3.59748	25.9327	-2.84209	0.000226518	0.00109671	CG11905	3L	16928381	16935536	-	4644	protein_coding	-	-	2	1	8	21	36	21	0.0210559	0.0111225	0.0853993	0.223205	0.407044	0.261593
FBgn0033874	0	2.08598	1.96019	15.0006	4.92636	8.62476	1.34872	9.51723	-2.83746	0.018398	0.0448602	CG6347	2R	13836419	13839363	+	1312	protein_coding	-	Peptidase_C1	0	2	2	16	5	8	0	0.0787395	0.0755706	0.601953	0.200109	0.352741
FBgn0032067	19.0869	25.0318	10.781	101.254	216.76	64.6857	18.2999	127.566	-2.80573	6.99897e-10	1.12355e-08	CG9465	2L	8769159	8772344	-	2953	protein_coding	-	-	20	24	11	108	220	60	0.331134	0.419802	0.184666	1.80525	3.91192	1.17541
FBgn0262881	0.954344	6.25794	0	13.1255	31.5287	4.31238	2.40409	16.3222	-2.7891	0.0096131	0.0265198	CG43236	2R	14638538	14638935	+	398	protein_coding	-	-	1	6	0	14	32	4	0.122844	0.77869	0	1.73629	4.2218	0.581402
FBgn0012042	26.7216	86.5682	28.4227	125.63	721.219	122.903	47.2375	323.251	-2.77564	0.00456236	0.0142072	AttA	2R	14747362	14748215	+	790	protein_coding	-	-	28	83	29	134	732	114	1.73288	5.42684	1.81982	8.37248	48.6536	8.34791
FBgn0033826	191.823	170.007	181.317	872.845	2060.2	700.762	181.049	1211.27	-2.74205	1.84135e-08	2.31375e-07	CG4734	2R	13297202	13298467	-	1011	protein_coding	-	-	201	163	185	931	2091	650	9.72035	8.32785	9.07146	45.4543	108.601	37.1931
FBgn0036352	1.90869	4.17196	4.90047	15.9381	32.514	24.7962	3.66037	24.4161	-2.742	0.000205159	0.00100443	CG14110	3L	13384789	13385925	+	1085	protein_coding	-	-	2	4	5	17	33	23	0.0901233	0.190426	0.228453	0.773385	1.59704	1.2263
FBgn0035281	4.77172	6.25794	1.96019	32.8137	0	52.8267	4.32995	28.5468	-2.72239	0.0060899	0.018054	Cpr62Bc	3L	1840281	1842084	-	1134	protein_coding	-	Chitin_bind_4	5	6	2	35	0	49	0.215573	0.273297	0.0874326	1.52346	0	2.49967
FBgn0250836	236.677	210.684	218.561	1551.62	1887.78	920.693	221.974	1453.37	-2.71102	3.19986e-35	7.55104e-33	CG8628	3L	7130874	7131505	+	436	protein_coding	-	-	248	202	223	1655	1916	854	27.8101	23.931	25.3557	187.365	230.749	113.311
FBgn0028999	2.86303	0	2.94028	4.68767	6.89691	26.9524	1.93444	12.8457	-2.70753	0.0149779	0.0378982	nerfin-1	3L	909112	912319	+	3208	protein_coding	-	-	3	0	3	5	7	25	0.0457219	0	0.04636	0.0769329	0.114576	0.450822
FBgn0052379	6.68041	6.25794	6.86066	52.5019	33.4993	40.9676	6.59967	42.3229	-2.68114	9.82029e-07	8.83152e-06	CG32379	3L	7396355	7398208	+	1238	protein_coding	-	-	7	6	7	56	34	38	0.276449	0.250338	0.280307	2.23277	1.44208	1.77567
FBgn0033774	6191.79	7632.6	8980.6	45253.9	54970.3	45623.9	7601.66	48616	-2.67707	9.10172e-72	1.53416e-68	CG12374	2R	12762113	12763825	+	1464	protein_coding	-	-	6488	7318	9163	48269	55792	42319	216.674	258.195	310.28	1627.44	2001.07	1672.22
FBgn0035056	3.81738	3.12897	1.96019	8.43781	28.5729	18.3276	2.96884	18.4461	-2.63256	0.00197896	0.00701614	spz6	2R	24757378	24760466	+	1647	protein_coding	-	-	4	3	2	9	29	17	0.118742	0.0940858	0.0601995	0.269728	0.92456	0.597111
FBgn0028855	20.0412	7.30093	2.94028	122.817	31.5287	33.421	10.0941	62.5889	-2.6291	5.31215e-05	0.000309674	CG15282	2L	14712471	14713298	+	701	protein_coding	-	-	21	7	3	131	32	31	1.46467	0.515794	0.212158	9.22422	2.39697	2.55825
FBgn0038718	140.289	85.5252	122.512	840.031	601.016	693.215	116.109	711.421	-2.61291	3.8545e-36	1.01065e-33	CG17752	3R	19610225	19612437	+	1716	protein_coding	-	Sugar_tr	147	82	125	896	610	643	4.18829	2.46827	3.61118	25.7731	18.6657	21.6767
FBgn0038011	19.0869	86.5682	89.1886	490.331	414.8	271.68	64.9479	392.27	-2.59556	8.19408e-05	0.000450731	CG4066	3R	12311353	12313119	+	1767	protein_coding	-	-	20	83	91	523	421	252	0.553389	2.42626	2.55306	14.6097	12.5105	8.25019
FBgn0051267	30.539	29.2037	32.3431	170.631	223.657	156.324	30.6953	183.537	-2.57995	1.93047e-19	1.16808e-17	CG31267	3R	17134197	17135283	+	921	protein_coding	-	Trypsin	32	28	33	182	227	145	1.69874	1.57034	1.77628	9.75413	12.9419	9.10769
FBgn0029531	0.954344	3.12897	2.94028	18.7507	12.8085	9.70286	2.3412	13.754	-2.56733	0.0060016	0.017828	CG13362	X	749241	751301	-	1686	protein_coding	-	-	1	3	3	20	13	9	0.0289988	0.0919094	0.0882105	0.58553	0.404871	0.308805
FBgn0034784	12.4065	19.8168	7.84075	74.0652	78.8218	73.3105	13.3547	75.3992	-2.50459	2.66381e-09	3.90439e-08	CG9826	2R	22840739	22842977	+	2096	protein_coding	-	MFS_1	13	19	8	79	80	68	0.303242	0.468229	0.189215	1.86043	2.00415	1.8768
FBgn0058005	5.72607	2.08598	3.92038	10.3129	5.91164	50.6705	3.91081	22.2983	-2.49752	0.00535016	0.0162029	CR40005	2L	22949038	22950476	-	1227	pseudogene	-	G-alpha	6	2	4	11	6	47	0.23908	0.0841941	0.161611	0.442512	0.256766	2.21591
FBgn0036780	6.68041	3.12897	0	31.8762	15.7644	6.46857	3.26979	18.0364	-2.46279	0.00953253	0.0263344	CG7330	3L	18148923	18153807	+	1166	protein_coding	-	-	7	3	0	34	16	6	0.293519	0.132898	0	1.43932	0.72053	0.297682
FBgn0051041	98.2975	168.964	162.696	621.586	929.112	788.088	143.319	779.595	-2.44502	8.48699e-29	1.33517e-26	CG31041	3R	29590070	29590906	-	700	protein_coding	-	-	103	162	166	663	943	731	7.1941	11.954	11.7562	46.7511	70.7366	60.4114
FBgn0050101	17.1782	17.7308	10.781	129.38	27.5876	90.56	15.23	82.5091	-2.43928	2.20812e-06	1.83218e-05	CG30101	2R	17408258	17410204	-	1545	protein_coding	-	-	18	17	11	138	28	84	0.569615	0.568351	0.352956	4.40887	0.951613	3.14522
FBgn0003920	5.72607	0	6.86066	33.7513	19.7055	15.0933	4.19557	22.85	-2.43388	0.00237593	0.00814595	snRNA:U2:14B	X	16254672	16254863	+	192	snRNA	-	-	6	0	7	36	20	14	1.52787	0	1.8074	9.25503	5.46965	4.21819
FBgn0051266	28.6303	34.4187	38.2237	149.068	229.568	164.949	33.7576	181.195	-2.42525	1.32685e-16	5.63149e-15	CG31266	3R	17132662	17133719	+	993	protein_coding	-	Trypsin	30	33	39	159	233	153	1.4771	1.71657	1.94703	7.90359	12.3208	8.91337
FBgn0266649	5.72607	50.0635	17.6417	165.006	128.085	95.9505	24.4771	129.681	-2.41535	7.09434e-07	6.61186e-06	CR45156	3L	4345801	4347801	+	1477	lincRNA	-	-	6	48	18	176	130	89	0.198613	1.67864	0.604155	5.88178	4.62161	3.48585
FBgn0034159	7.63475	2.08598	4.90047	56.2521	0	21.5619	4.87373	25.938	-2.40795	0.0172152	0.0424853	CG15615	2R	16793119	16796407	-	1429	protein_coding	-	-	8	2	5	60	0	20	0.273713	0.0722926	0.173458	2.07251	0	0.80965
FBgn0039795	2.86303	3.12897	4.90047	26.251	11.8233	19.4057	3.63082	19.16	-2.40029	0.00210751	0.00737877	Spn100A	3R	30690642	30692768	+	2038	protein_coding	-	Serpin	3	3	5	28	12	18	0.0719704	0.076035	0.121625	0.678157	0.309177	0.510938
FBgn0264479	7.63475	1.04299	1.96019	19.6882	23.6465	12.9371	3.54598	18.7573	-2.38913	0.0041787	0.0132007	CR43887	3L	11693135	11693661	+	527	lincRNA	-	-	8	1	2	21	24	12	0.742192	0.0980135	0.188138	1.96691	2.39128	1.31726
FBgn0051661	76.3475	116.815	179.357	628.148	787.233	522.876	124.173	646.086	-2.38013	1.80599e-20	1.23889e-18	CG31661	2L	1497243	1498583	+	1341	protein_coding	-	Asp	80	112	183	670	799	485	2.91674	4.31405	6.76517	24.6617	31.2859	20.9225
FBgn0000355	6166.97	5325.51	14048.7	43966.6	48389.7	39438.9	8513.72	43931.7	-2.3674	7.43682e-07	6.88752e-06	Cp15	3L	8728481	8729066	+	515	protein_coding	-	-	6462	5106	14334	46896	49113	36582	613.475	512.118	1379.8	4494.75	5007.49	4109.23
FBgn0039768	138.38	138.718	37.2436	307.511	1014.83	282.461	104.78	534.934	-2.35216	0.00307311	0.0101539	CG15533	3R	30428820	30431362	+	2203	protein_coding	-	Metallophos	145	133	38	328	1030	262	3.21803	3.11841	0.855117	7.34913	24.5501	6.87997
FBgn0036956	21.9499	11.4729	5.88056	75.9403	68.9691	54.9829	13.1011	66.6308	-2.34286	5.76564e-07	5.45978e-06	CG13813	3L	20231669	20233255	+	1527	protein_coding	-	-	23	11	6	81	70	51	0.73642	0.372092	0.194791	2.61832	2.40708	1.93211
FBgn0035513	10.4978	1.04299	10.781	53.4395	4.92636	54.9829	7.4406	37.7829	-2.33553	0.00348893	0.0112766	Cpr64Ad	3L	4215379	4216414	+	961	protein_coding	-	Chitin_bind_4	11	1	11	57	5	51	0.559637	0.0537493	0.567448	2.92771	0.273198	3.07006
FBgn0020637	3.81738	5.21495	2.94028	17.8132	2.95582	38.8114	3.99087	19.8601	-2.31399	0.00994976	0.0273097	Lcp65Ag2	3L	6132990	6133593	-	543	protein_coding	-	Chitin_bind_4	4	5	3	19	3	36	0.360161	0.475627	0.273891	1.72715	0.290103	3.83533
FBgn0043791	4.77172	4.17196	3.92038	10.3129	23.6465	30.1867	4.28802	21.382	-2.31242	0.00202145	0.00711976	CG8147	3R	9494801	9496723	+	1862	protein_coding	-	-	5	4	4	11	24	28	0.131289	0.110963	0.106497	0.291601	0.676803	0.869918
FBgn0041252	256.719	531.925	402.819	2125.39	2219.82	1531.97	397.154	1959.06	-2.30359	1.79389e-25	2.01582e-23	Femcoat	X	4241887	4242826	-	833	protein_coding	-	-	269	510	411	2267	2253	1421	15.7886	31.6243	24.4598	134.333	142.019	98.6845
FBgn0031001	3.81738	5.21495	5.88056	19.6882	26.6024	26.9524	4.97096	24.4143	-2.2968	0.00055858	0.00237075	CG7884	X	19220622	19235910	+	3960	protein_coding	-	-	4	5	6	21	27	25	0.0493858	0.0652186	0.0751126	0.261758	0.358013	0.365212
FBgn0019928	67.7584	109.514	54.8853	395.64	406.918	329.897	77.3859	377.485	-2.29046	1.2734e-20	8.89047e-19	Ser8	2R	13434207	13435045	+	839	protein_coding	-	Trypsin	71	105	56	422	413	306	4.13746	6.46433	3.30889	24.8272	25.8475	21.0989
FBgn0032789	618.415	1404.91	1057.52	5750.84	5497.82	3798.13	1026.95	5015.6	-2.28825	3.44584e-10	5.88386e-09	CG13083	2L	19487490	19488691	+	1145	protein_coding	-	-	648	1347	1079	6134	5580	3523	27.6698	60.7657	46.7167	264.433	255.894	177.995
FBgn0050047	18.1325	29.2037	23.5223	129.38	115.277	92.7162	23.6195	112.458	-2.25712	2.57614e-11	5.20477e-10	CG30047	2R	12351793	12355413	+	2809	protein_coding	-	-	19	28	24	138	117	86	0.330704	0.514876	0.423561	2.42496	2.18708	1.77111
FBgn0051928	271.988	322.284	470.445	1817.88	1806.99	1430.63	354.906	1685.17	-2.2476	1.47573e-31	2.72064e-29	CG31928	2L	1492295	1493859	+	1565	protein_coding	-	Asp	285	309	480	1939	1834	1327	8.90364	10.1986	15.2049	61.1561	61.5341	49.052
FBgn0027074	4.77172	16.6878	3.92038	41.2515	34.4845	42.0457	8.45998	39.2606	-2.22808	0.00015215	0.000780531	CG17324	2L	18819344	18822573	+	1680	protein_coding	-	UDPGT	5	16	4	44	35	39	0.145512	0.491934	0.118034	1.29277	1.09393	1.34294
FBgn0000358	2482.25	6582.31	5296.43	12771.1	33132.7	20575.5	4787	22159.8	-2.21077	3.15399e-05	0.000198477	Cp19	3L	8729865	8730604	+	651	protein_coding	-	-	2601	6311	5404	13622	33628	19085	195.342	500.741	411.52	1032.85	2712.38	1695.94
FBgn0050031	342.61	539.226	527.291	820.343	3319.38	2350.25	469.709	2163.32	-2.20345	0.000164588	0.000833108	CG30031	2R	11350811	11351621	+	811	protein_coding	-	Trypsin	359	517	538	875	3369	2180	21.6427	32.9281	32.8865	53.2554	218.128	155.502
FBgn0032523	4.77172	34.4187	24.5024	88.1283	111.336	89.4819	21.2309	96.3153	-2.18952	2.07997e-06	1.74177e-05	CG16956	2L	13413783	13414575	-	737	protein_coding	-	-	5	33	25	94	113	83	0.331695	2.31283	1.68162	6.2956	8.05085	6.51494
FBgn0032788	323.523	1374.66	1093.78	4075.46	4873.16	3471.47	930.656	4140.03	-2.15343	0.000257339	0.00121844	CG13084	2L	19484930	19486532	+	1544	protein_coding	-	-	339	1318	1116	4347	4946	3220	10.7347	44.0925	35.8322	138.969	168.204	120.645
FBgn0032913	59.1693	52.1495	34.3033	224.071	190.158	232.869	48.5407	215.699	-2.15127	2.91831e-16	1.17519e-14	CG9259	2L	21089375	21090999	+	1566	protein_coding	-	-	62	50	35	239	193	216	1.9357	1.6492	1.10798	7.53326	6.47137	7.97924
FBgn0052284	19.0869	15.6448	15.6815	69.3776	98.5273	52.8267	16.8044	73.5772	-2.13039	2.25801e-07	2.32075e-06	CG32284	3L	3186664	3187245	+	457	protein_coding	-	-	20	15	16	74	100	49	2.13969	1.6954	1.73564	7.99267	11.4899	6.20268
FBgn0028573	8.5891	5.21495	6.86066	36.5639	8.86745	44.2019	6.88824	29.8777	-2.11122	0.00219338	0.00763265	prc	3L	11958872	11966131	-	5535	protein_coding	-	-	9	5	7	39	9	41	0.079499	0.0466604	0.0626956	0.347795	0.0853799	0.428515
FBgn0039704	7.63475	13.5589	9.80094	33.7513	38.4256	61.4514	10.3315	44.5428	-2.11024	4.00038e-05	0.00024237	neo	3R	29819131	29825800	+	3005	protein_coding	-	PAN_1	8	13	10	36	39	57	0.130162	0.223458	0.164973	0.591336	0.681476	1.09731
FBgn0032303	59.1693	30.2467	108.79	404.077	239.421	208.072	66.0688	283.857	-2.1017	4.87038e-09	6.7846e-08	CG6508	2L	10819107	10820485	+	1379	protein_coding	-	Asp	62	29	111	431	243	193	2.19819	1.08625	3.99039	15.4273	9.25279	8.09642
FBgn0014076	365.514	944.949	1266.28	3883.27	4393.33	2731.89	858.915	3669.5	-2.09507	8.05755e-05	0.000444465	Vm32E	2L	11171167	11171665	-	499	protein_coding	-	-	383	906	1292	4142	4459	2534	37.5263	93.783	128.357	409.719	469.21	293.769
FBgn0051926	205.184	343.144	262.665	1017.23	1412.88	990.77	270.331	1140.29	-2.07803	1.25584e-24	1.3113e-22	CG31926	2L	1495460	1497071	+	1612	protein_coding	-	Asp	215	329	268	1085	1434	919	6.52094	10.5421	8.24188	33.2232	46.7105	32.98
FBgn0044046	35.3107	16.6878	33.3232	118.129	133.012	104.575	28.4406	118.572	-2.05471	1.03726e-09	1.61886e-08	Ilp7	X	3667621	3668845	+	1044	protein_coding	-	-	37	16	34	126	135	97	1.73276	0.791618	1.61449	5.95726	6.78991	5.37491
FBgn0250815	7385.67	9980.37	9171.72	22946.2	51617.4	34301.8	8845.92	36288.5	-2.03643	8.90304e-09	1.18082e-07	Jon65Aiv	3L	6039155	6040135	+	904	protein_coding	-	Trypsin	7739	9569	9358	24475	52389	31817	418.556	546.757	513.182	1336.38	3043	2036.06
FBgn0033855	9.54344	7.30093	8.82085	18.7507	39.4109	47.4362	8.55507	35.1993	-2.0345	0.000428594	0.00188764	link	2R	13555949	13557342	+	1394	protein_coding	-	-	10	7	9	20	40	44	0.350731	0.259377	0.320064	0.70818	1.5067	1.82595
FBgn0031277	42.9455	95.9551	203.86	465.017	364.551	563.844	114.253	464.471	-2.02337	0.00111868	0.00427993	CG13947	2L	779173	779655	+	483	protein_coding	-	-	45	92	208	496	370	523	4.55515	9.83868	21.3488	50.6887	40.224	62.6404
FBgn0011556	101.16	98.041	48.0246	305.636	418.741	274.914	82.4087	333.097	-2.01602	2.01158e-13	5.50689e-12	zetaTry	2R	11339186	11340132	-	947	protein_coding	-	Trypsin	106	94	49	326	425	255	5.47259	5.12713	2.56509	16.992	23.5651	15.5772
FBgn0086266	97.3431	148.105	244.043	592.522	885.76	495.924	163.164	658.069	-2.01239	8.79845e-13	2.16728e-11	Vm26Ac	2L	5958005	5958631	-	627	protein_coding	-	-	102	142	249	632	899	460	7.95371	11.6981	19.6874	49.7538	75.2875	42.4414
FBgn0039591	3.81738	3.12897	7.84075	32.8137	6.89691	19.4057	4.92903	19.7054	-1.9983	0.0124542	0.0326785	CG9988	3R	28636411	28638799	+	2274	protein_coding	-	DUF229	4	3	8	35	7	18	0.0860016	0.0681439	0.174404	0.759721	0.161636	0.457912
FBgn0265315	2.86303	7.30093	20.582	39.3765	61.0869	21.5619	10.2486	40.6751	-1.99073	0.00194954	0.00691807	CR44288	3R	27538233	27539159	+	927	lincRNA	-	-	3	7	21	42	62	20	0.158226	0.390045	1.12304	2.23638	3.5119	1.2481
FBgn0085362	891.358	1670.87	2326.74	4783.3	8624.09	5911.2	1629.66	6439.53	-1.98241	9.21866e-06	6.63238e-05	Vml	X	2275822	2277781	+	1960	protein_coding	-	-	934	1602	2374	5102	8753	5483	23.2985	42.2185	60.0456	128.488	234.494	161.831
FBgn0003983	2287.56	6090.02	7895.64	15483.4	28571.9	19899.5	5424.41	21318.3	-1.97456	0.000110513	0.00058842	Vm34Ca	2L	13411141	13411631	-	491	protein_coding	-	-	2397	5839	8056	16515	28999	18458	238.684	614.262	813.382	1660.25	3101.22	2174.72
FBgn0003356	5522.79	7395.84	7551.62	17065	32516	30694.5	6823.42	26758.5	-1.97143	4.09158e-22	3.21844e-20	Jon99Cii	3R	29923754	29924615	-	862	protein_coding	-	Trypsin	5787	7091	7705	18202	33002	28471	328.234	424.91	443.121	1042.29	2010.31	1910.71
FBgn0052642	375.057	297.252	389.097	1260.05	1525.2	1354.09	353.802	1379.78	-1.9625	3.68564e-37	1.06066e-34	CG32642	X	12959220	12960790	+	1413	protein_coding	-	-	393	285	397	1344	1548	1256	13.5984	10.4184	13.9285	46.9498	57.5254	51.4218
FBgn0267108	15.2695	4.17196	1.96019	60.0022	10.838	11.859	7.13388	27.5664	-1.94762	0.0194328	0.046941	CR45548	3R	27961443	27961821	-	321	pseudogene	-	-	16	4	2	64	11	11	2.43698	0.643652	0.308874	9.84128	1.79936	1.98238
FBgn0043578	343.564	405.723	330.292	688.15	2649.4	809.65	359.86	1382.4	-1.94173	0.00183825	0.00659055	PGRP-SB1	3L	16727299	16727989	-	623	protein_coding	-	-	360	389	337	734	2689	751	28.2521	32.2521	26.8163	58.1547	226.638	69.7351
FBgn0038719	37.2194	33.3757	37.2436	144.38	150.747	118.59	35.9462	137.906	-1.93982	1.15383e-11	2.4574e-10	CG16727	3R	19613381	19615784	+	2014	protein_coding	-	Sugar_tr	39	32	38	154	153	110	0.946765	0.820705	0.935364	3.77431	3.98899	3.15961
FBgn0265316	26.7216	45.8916	64.6862	199.695	174.393	150.933	45.7665	175.007	-1.93744	3.71033e-10	6.27195e-09	CR44289	3R	27535831	27537903	-	2073	lincRNA	-	-	28	44	66	213	177	140	0.660383	1.09635	1.57834	5.07174	4.48337	3.90687
FBgn0038482	20.0412	31.2897	21.5621	122.817	77.8365	75.4667	24.2977	92.0401	-1.92738	2.04151e-07	2.11482e-06	CG4053	3R	17131211	17132198	-	925	protein_coding	-	Trypsin	21	30	22	131	79	70	1.10998	1.67524	1.17906	6.99047	4.48452	4.3778
FBgn0043575	352.153	535.054	424.381	1429.74	2058.23	1456.51	437.196	1648.16	-1.91535	2.79349e-24	2.7467e-22	PGRP-SC2	2R	8716950	8717695	+	746	protein_coding	-	-	369	513	433	1525	2089	1351	24.1838	35.5202	28.7744	100.904	147.038	104.765
FBgn0036996	241.449	230.501	222.481	656.274	1246.37	692.137	231.477	864.927	-1.90174	4.35687e-17	2.00807e-15	mag	3L	20460683	20462274	+	1477	protein_coding	-	-	253	221	227	700	1265	642	8.37485	7.72873	7.61907	23.3934	44.9718	25.1452
FBgn0029966	78.2562	150.191	235.223	556.896	684.764	470.05	154.556	570.57	-1.88505	5.52432e-11	1.05814e-09	Ir7c	X	7874394	7876847	+	2358	protein_coding	-	-	82	144	240	594	695	436	1.70023	3.15439	5.04573	12.4342	15.4765	10.6965
FBgn0035398	13.3608	16.6878	8.82085	78.7529	20.6907	43.1238	12.9565	47.5225	-1.87956	0.000717173	0.0029443	Cht7	3L	3090985	3106958	-	3953	protein_coding	-	CBM_14	14	16	9	84	21	40	0.173156	0.209069	0.112868	1.04889	0.278948	0.585373
FBgn0035522	1.90869	13.5589	2.94028	31.8762	18.7202	16.1714	6.13595	22.2559	-1.87692	0.0143272	0.0366218	CG1273	3L	4263719	4277778	+	4187	protein_coding	-	-	2	13	3	34	19	15	0.0233542	0.160375	0.0355202	0.400823	0.238277	0.207247
FBgn0032311	19.0869	10.4299	36.2635	63.7524	94.5862	84.0914	21.9268	80.81	-1.87682	1.13882e-05	7.99817e-05	CG12517	2L	10870167	10870722	+	556	protein_coding	-	-	20	10	37	68	96	78	1.7587	0.929012	3.29901	6.03685	9.06624	8.11558
FBgn0031097	20.0412	22.9458	17.6417	140.63	17.7349	63.6076	20.2096	73.9909	-1.87489	0.000846168	0.00337752	obst-A	X	20239855	20243209	+	1905	protein_coding	-	CBM_14	21	22	18	150	18	59	0.538966	0.596519	0.468419	3.88663	0.496144	1.79166
FBgn0266309	7.63475	3.12897	4.90047	26.251	9.85273	21.5619	5.2214	19.2219	-1.87354	0.0120844	0.0319195	CR44974	2L	15746257	15747000	+	686	lincRNA	-	-	8	3	5	28	10	20	0.570168	0.225888	0.361329	2.0147	0.765432	1.68657
FBgn0267771	8.5891	4.17196	5.88056	25.3134	23.6465	19.4057	6.21387	22.7886	-1.86992	0.00406965	0.0128941	CR46102	3R	25738027	25738689	+	663	lincRNA	-	-	9	4	6	27	24	18	0.663691	0.311633	0.448636	2.01014	1.90076	1.57058
FBgn0001253	7.63475	5.21495	5.88056	30.0011	18.7202	19.4057	6.24342	22.709	-1.86192	0.00437767	0.0137227	ImpE1	3L	8372405	8391171	+	6264	protein_coding	-	Ldl_recept_a	8	5	6	32	19	18	0.0624418	0.0412301	0.047485	0.252159	0.159269	0.166234
FBgn0266412	4.77172	10.4299	14.7014	43.1266	41.3814	21.5619	9.96768	35.3567	-1.83267	0.00145618	0.00537931	CR45052	3R	31704781	31705498	-	718	lincRNA	-	-	5	10	15	46	42	20	0.340473	0.719402	1.03567	3.16235	3.07153	1.61141
FBgn0000356	2205.49	2783.74	2328.7	6586.18	11319.8	8035.05	2439.31	8647.01	-1.82581	3.24495e-24	3.16423e-22	Cp16	3L	8731944	8732599	+	522	protein_coding	-	-	2311	2669	2376	7025	11489	7453	216.454	264.104	225.649	664.282	1155.69	825.963
FBgn0035697	38.1738	214.856	195.039	703.151	526.136	354.693	149.356	527.993	-1.82227	0.0122388	0.0322406	CG10163	3L	6257423	6258760	-	1220	protein_coding	-	Lipase	40	206	199	750	534	329	1.60301	8.72175	8.0863	30.3444	22.9833	15.6004
FBgn0000357	9568.26	5622.76	4282.03	21689.9	26893	20106.5	6491.01	22896.5	-1.8186	1.27363e-06	1.10986e-05	Cp18	3L	8726791	8727613	+	649	protein_coding	-	-	10026	5391	4369	23135	27295	18650	755.301	429.063	333.729	1759.55	2208.36	1662.39
FBgn0038986	5.72607	9.38691	10.781	15.0006	10.838	65.7638	8.63134	30.5341	-1.8185	0.0119991	0.0317508	CG5278	3R	22558342	22562572	-	1722	protein_coding	-	ELO	6	9	11	16	11	61	0.170355	0.269964	0.316677	0.458631	0.335421	2.04926
FBgn0030438	399.87	311.854	481.226	1783.19	1195.14	1207.47	397.65	1395.26	-1.81072	4.17004e-20	2.73346e-18	CG15721	X	12970711	12973967	+	2804	protein_coding	-	-	419	299	491	1902	1213	1120	7.30589	5.50794	8.68081	33.4818	22.715	23.1068
FBgn0001285	504.848	598.676	516.51	1728.81	1776.45	2138.94	540.011	1881.4	-1.80094	2.99866e-36	8.04119e-34	Jon44E	2R	8691448	8692844	+	1397	protein_coding	-	Trypsin	529	574	527	1844	1803	1984	18.5138	21.2232	18.7013	65.154	67.7688	82.1571
FBgn0003357	4705.87	6349.72	6696	15690.6	22448.4	23131.6	5917.2	20423.5	-1.78726	1.83645e-25	2.04417e-23	Jon99Ciii	3R	29922216	29923455	+	1240	protein_coding	-	Trypsin	4931	6088	6832	16736	22784	21456	194.424	253.6	273.138	666.203	964.804	1000.98
FBgn0052282	2.86303	10.4299	2.94028	26.251	13.7938	15.0933	5.41107	18.3794	-1.77954	0.020836	0.0497358	Drsl4	3L	3315620	3315942	+	323	protein_coding	-	-	3	10	3	28	14	14	0.454104	1.59917	0.460442	4.2789	2.27592	2.50741
FBgn0028945	63.9411	61.5364	43.1241	181.882	284.744	106.731	56.2005	191.119	-1.76732	1.62256e-07	1.71393e-06	CG7631	2L	15628678	15629552	+	813	protein_coding	-	Astacin	67	59	44	194	289	99	4.02922	3.7485	2.68299	11.7784	18.6654	7.04441
FBgn0003980	2325.74	4358.65	5033.76	7472.15	19214.8	12848.7	3906.05	13178.6	-1.75442	0.000240627	0.0011532	Vm26Ab	2L	5957004	5957639	+	636	protein_coding	-	-	2437	4179	5136	7970	19502	11918	187.342	339.4	400.336	618.554	1610.1	1084.04
FBgn0000427	4311.73	7412.53	11111.3	25044.4	29537.5	22105.3	7611.86	25562.4	-1.74771	8.20799e-06	5.96343e-05	2022-12-01	X	7867161	7873222	-	5748	protein_coding	-	-	4518	7107	11337	26713	29979	20504	38.4297	63.8654	97.7773	229.394	273.862	206.358
FBgn0086027	7.63475	4.17196	7.84075	30.9386	18.7202	16.1714	6.54916	21.9434	-1.74275	0.00910653	0.0253296	snoRNA:Or-CD1	2R	22197269	22197374	-	106	snoRNA	-	-	8	4	8	33	19	15	3.68996	1.94917	3.74146	15.3668	9.41192	8.18625
FBgn0030148	281.532	476.646	218.561	1050.04	1261.15	954.114	325.58	1088.43	-1.74249	6.01409e-14	1.75644e-12	CG3106	X	9659095	9662903	-	2589	protein_coding	-	-	295	457	223	1120	1280	885	5.57092	9.1176	4.27001	21.3532	25.9602	19.7747
FBgn0003979	4349.9	9352.49	11647.4	16610.3	39980.4	27950.7	8449.94	28180.5	-1.73769	0.000573056	0.00242174	Vm26Aa	2L	5959596	5960340	-	745	protein_coding	-	-	4558	8967	11884	17717	40578	25926	299.127	621.709	790.793	1173.84	2859.99	2013.16
FBgn0086265	265.308	503.764	718.409	1047.23	2395.2	1510.41	495.827	1650.95	-1.73544	0.000722014	0.002958	psd	2L	5963087	5964951	-	1543	protein_coding	-	-	278	483	733	1117	2431	1401	8.80878	16.1688	23.5502	35.7325	82.7275	52.5257
FBgn0052644	101.16	140.804	137.213	359.076	536.974	353.615	126.392	416.555	-1.72203	2.62093e-14	8.09539e-13	Mur11Da	X	12967888	12970056	+	2012	protein_coding	-	-	106	135	140	383	545	328	2.57582	3.46579	3.4495	9.39609	14.2233	9.43074
FBgn0038611	625.095	1696.94	2171.89	5339.26	5400.28	4048.25	1497.98	4929.26	-1.71841	0.000871142	0.00345848	CG14309	3R	18381580	18385072	-	3341	protein_coding	-	-	655	1627	2216	5695	5481	3755	9.58522	25.154	32.8814	84.1383	86.1418	65.0179
FBgn0032082	62.0324	126.202	66.6464	360.951	235.48	231.791	84.9602	276.074	-1.70438	4.26103e-09	6.05005e-08	CG18088	2L	8967535	8970627	+	2628	protein_coding	-	DUF229	65	121	68	385	239	215	1.20927	2.37824	1.28274	7.23123	4.77533	4.73274
FBgn0263748	191.823	166.878	158.775	530.645	584.267	559.532	172.492	558.148	-1.69336	2.50391e-24	2.52509e-22	CG43673	X	15779146	15780214	+	881	protein_coding	-	CBM_14	201	160	162	566	593	519	11.1547	9.38081	9.11582	31.7115	35.3435	34.0793
FBgn0010359	731.028	1051.33	932.069	2729.16	3468.16	2563.71	904.81	2920.34	-1.69092	1.73388e-24	1.79456e-22	gammaTry	2R	11349061	11349870	-	810	protein_coding	-	Trypsin	766	1008	951	2911	3520	2378	46.2361	64.2794	58.2039	177.392	228.186	169.835
FBgn0265918	16.2239	9.38691	21.5621	49.6893	69.9543	32.3429	15.7243	50.6622	-1.68587	0.00050744	0.00218037	CR44707	X	18682143	18683303	-	1096	lincRNA	-	-	17	9	22	53	71	30	0.75836	0.424159	0.995105	2.38694	3.40156	1.58347
FBgn0050025	405.596	488.119	405.759	717.214	2218.83	1225.79	433.158	1387.28	-1.67934	0.000317977	0.00146899	CG30025	2R	11353564	11354373	-	810	protein_coding	-	Trypsin	425	468	414	765	2252	1137	25.6532	29.844	25.338	46.6179	145.987	81.2036
FBgn0014466	1516.45	843.779	1707.32	4187.03	4594.33	4195.95	1355.85	4325.77	-1.67344	8.59466e-17	3.7839e-15	Cp7Fc	X	8477117	8478320	+	1132	protein_coding	-	-	1589	809	1742	4466	4663	3892	68.6301	36.9146	76.2884	194.737	216.297	198.896
FBgn0037731	10.4978	11.4729	10.781	69.3776	12.8085	21.5619	10.9172	34.5827	-1.66821	0.0102016	0.0278281	CG18542	3R	9685760	9687141	+	1263	protein_coding	-	-	11	11	11	74	13	20	0.42582	0.449869	0.431763	2.89204	0.540469	0.916065
FBgn0000644	88.754	312.897	393.998	752.84	928.127	834.446	265.216	838.471	-1.66079	0.00500209	0.0153577	Fcp3C	X	3173376	3174474	-	963	protein_coding	-	-	93	300	402	803	942	774	4.72165	16.0913	20.6946	41.1591	51.3636	46.4959
FBgn0263109	5.72607	15.6448	10.781	36.5639	30.5434	33.421	10.7173	33.5094	-1.65255	0.00232091	0.00800482	CG43366	2R	5893895	5931363	+	7712	protein_coding	-	Serpin	6	15	11	39	31	31	0.0380383	0.100466	0.0707102	0.249617	0.211069	0.232538
FBgn0038395	324.477	433.884	553.753	1492.56	1321.25	1290.48	437.371	1368.1	-1.64566	1.58279e-19	9.72672e-18	CG10407	3R	16044747	16046130	-	1113	protein_coding	-	-	340	416	565	1592	1341	1197	14.9355	19.3061	25.1657	70.6032	63.2651	62.2155
FBgn0014465	1900.1	1146.25	2252.26	5141.44	6306.73	5094	1766.2	5514.06	-1.64225	1.53751e-16	6.4559e-15	Cp7Fb	X	8473837	8476071	+	2093	protein_coding	-	-	1991	1099	2298	5484	6401	4725	46.5092	27.1222	54.4299	129.332	160.587	130.597
FBgn0033292	56.3063	49.0205	43.1241	150.006	209.863	101.341	49.4837	153.737	-1.63639	1.77083e-07	1.85376e-06	Cyp4ad1	2R	8439395	8442806	-	1903	protein_coding	-	p450	59	47	44	160	213	94	1.51583	1.27572	1.14623	4.15009	5.87721	2.85752
FBgn0000359	6077.26	15632.3	16278.4	28153.2	50775	38557	12662.7	39161.8	-1.62887	0.000262205	0.00123998	Cp36	X	8479319	8480523	+	1116	protein_coding	-	-	6368	14988	16609	30029	51534	35764	278.982	693.707	737.795	1328.17	2424.71	1853.88
FBgn0000360	6574.48	23019.8	22411.8	38040.5	70507.1	52166.9	17335.4	53571.5	-1.62775	0.0015588	0.00570479	Cp38	X	8481837	8483311	+	1249	protein_coding	-	-	6889	22071	22867	40575	71561	48388	269.669	912.759	907.618	1603.51	3008.46	2241.17
FBgn0032055	137.426	82.3962	147.994	533.457	241.392	333.131	122.605	369.327	-1.59009	3.63834e-08	4.34062e-07	CG13091	2L	8519690	8521809	+	1796	protein_coding	-	NAD_binding_4	144	79	151	569	245	309	3.92006	2.27205	4.168	15.638	7.16292	9.95295
FBgn0261675	251.947	219.028	119.571	437.829	1047.34	292.164	196.849	592.446	-1.5897	0.0101266	0.0276711	Npc1b	X	20934869	20939503	+	3971	protein_coding	-	-	264	210	122	467	1063	271	3.25043	2.73159	1.52306	5.80488	14.0561	3.94793
FBgn0019661	28.6303	59.4504	43.1241	187.507	72.9102	125.059	43.735	128.492	-1.55893	3.63219e-05	0.000223442	roX1	X	3857230	3862697	-	5468	lincRNA	-	-	30	57	44	200	74	116	0.268244	0.538447	0.398915	1.80542	0.710614	1.22724
FBgn0040367	15.2695	36.5046	33.3232	88.1283	78.8218	81.9353	28.3658	82.9618	-1.55312	3.11708e-05	0.000196676	CG11382	X	1209970	1211853	+	1884	protein_coding	-	-	16	35	34	94	80	76	0.415218	0.959585	0.894653	2.46277	2.22967	2.33363
FBgn0264382	7.63475	7.30093	6.86066	27.1885	25.6171	10.781	7.26545	21.1955	-1.54925	0.0203556	0.048727	CR43834	X	8484194	8484580	+	243	lincRNA	-	-	8	7	7	29	26	10	1.60961	1.48795	1.42807	5.89072	5.61821	2.38064
FBgn0033065	398.916	381.734	416.54	1348.17	1158.68	989.692	399.063	1165.52	-1.54664	1.46632e-23	1.35165e-21	Cyp6w1	2R	6173684	6176195	+	2392	protein_coding	-	p450	418	366	425	1438	1176	918	8.54382	7.90344	8.80814	29.6739	25.8153	22.2014
FBgn0035743	74.4388	78.2242	73.5071	239.071	287.7	132.606	75.39	219.792	-1.54559	6.69383e-08	7.63097e-07	CG15829	3L	7128903	7129673	+	697	protein_coding	-	-	78	75	75	255	292	123	5.47141	5.55808	5.33439	18.0586	21.9979	10.2087
FBgn0262608	1775.08	2470.84	2391.43	7909.04	6630.88	4506.44	2212.45	6348.79	-1.52105	1.4119e-15	5.14166e-14	CG43134	X	4247313	4247785	+	407	protein_coding	-	-	1860	2369	2440	8436	6730	4180	223.437	300.654	297.202	1023.1	868.263	594.13
FBgn0001325	6.68041	9.38691	9.80094	36.5639	14.7791	22.64	8.62275	24.661	-1.52046	0.0150745	0.038054	Kr	2R	25226611	25231394	+	4411	protein_coding	-	-	7	9	10	39	15	21	0.0775886	0.105391	0.112388	0.436419	0.17856	0.275411
FBgn0037405	148.878	775.984	597.857	1510.37	1618.8	1234.42	507.573	1454.53	-1.51904	0.0192917	0.0466727	CG1077	3R	6167483	6170309	+	2302	protein_coding	-	-	156	744	610	1611	1643	1145	3.31327	16.6941	13.1365	34.5435	37.4768	28.774
FBgn0039778	3241.91	3947.72	4112.47	8420.94	12999.7	10778.8	3767.37	10733.1	-1.51046	1.25498e-20	8.81398e-19	Jon99Fi	3R	30488963	30489895	+	933	protein_coding	-	Trypsin	3397	3785	4196	8982	13194	9998	178.013	209.547	222.952	475.191	742.55	619.914
FBgn0036938	61.078	94.9121	129.372	283.135	301.493	224.244	95.1208	269.624	-1.50466	1.34036e-08	1.72417e-07	CG14187	3L	20112265	20112847	-	492	protein_coding	-	-	64	91	132	302	306	208	6.35992	9.55372	13.3004	30.2983	32.6578	24.4567
