# Supplementary material for: Auxin exposure disrupts feeding behavior and fatty acid metabolism in adult Drosophila
Source: eLife. 2024 Jan 19;12:RP91953. doi: 10.7554/eLife.91953 (PMC10945601; doi:10.7554/eLife.91953)
Supplement: Figure 3—source data 2. [file elife-91953-fig3-data2.xlsx]

## Sheet: Sheet1
gene_id	AID_10_f_1	AID_10_f_2	AID_10_f_3	AID_0_f_1	AID_0_f_2	AID_0_f_3	AID_f_10	AID_f	log2FoldChange	pvalue	padj	gene_name	gene_chr	gene_start	gene_end	gene_strand	gene_length	gene_biotype	gene_description	tf_family	AID_10_f_1_count	AID_10_f_2_count	AID_10_f_3_count	AID_0_f_1_count	AID_0_f_2_count	AID_0_f_3_count	AID_10_f_1_fpkm	AID_10_f_2_fpkm	AID_10_f_3_fpkm	AID_0_f_1_fpkm	AID_0_f_2_fpkm	AID_0_f_3_fpkm
FBgn0000442	21.5365	22.6294	23.506	4.34085	9.24689	3.06621	22.5573	5.55131	2.01997	0.00145018	0.00553473	Pkg21D	2L	786153	790798	-	2583	protein_coding	-	Pkinase	23	25	23	4	9	3	0.421449	0.451111	0.457609	0.087807	0.187654	0.0625219
FBgn0000565	4109.73	3992.74	4083.9	824.761	715.092	988.341	4062.12	842.731	2.26898	4.58e-69	1.61e-66	Eip71CD	3L	15511052	15513202	+	1354	protein_coding	-	PMSR	4389	4411	3996	760	696	967	153.422	151.84	151.67	31.8265	27.684	38.4453
FBgn0002576	54.3094	37.1123	52.1219	16.2782	12.3292	14.309	47.8479	14.3054	1.74214	2.98e-05	0.00019253	lz	X	9284649	9303636	+	3468	protein_coding	-	Runt	58	41	51	15	12	14	0.791571	0.551027	0.755758	0.245248	0.186355	0.217312
FBgn0002931	98.3188	95.9489	113.442	60.7719	21.5761	23.5076	102.57	35.2852	1.54379	9.44e-05	0.00052548	net	2L	82421	87387	-	2225	protein_coding	-	HLH	105	106	111	56	21	23	2.23357	2.22046	2.5638	1.42709	0.508309	0.556459
FBgn0003961	3725.82	3701.27	4118.65	448.192	528.1	504.902	3848.58	493.732	2.96186	1.15e-161	1.85e-158	Uro	2L	7780085	7781415	+	1262	protein_coding	-	-	3979	4089	4030	413	514	494	149.23	151.017	164.111	18.556	21.9352	21.0719
FBgn0004620	147.01	156.596	172.718	53.1754	46.2344	67.4566	158.774	55.6221	1.5119	2.77e-10	4.64e-09	GluRIIA	2L	5555072	5558994	+	3253	protein_coding	-	ANF_receptor	157	173	169	49	45	66	2.28432	2.47873	2.66989	0.854094	0.745019	1.09218
FBgn0004622	45.8821	45.2589	57.2319	11.9373	22.6035	15.331	49.4576	16.624	1.56817	0.00012652	0.00068174	TkR99D	3R	29950796	29969447	-	2880	protein_coding	-	7tm_1	49	50	56	11	22	15	0.805276	0.80918	0.99928	0.216568	0.411404	0.280372
FBgn0005613	25.282	29.8709	37.8139	18.4486	7.19202	6.13242	30.9889	10.591	1.55523	0.00526904	0.0162405	Sox15	2R	14201390	14212413	-	3651	protein_coding	-	HMG_box	27	33	37	17	7	6	0.35002	0.421279	0.520812	0.264016	0.103258	0.0884657
FBgn0005658	73.0368	63.3625	70.5179	18.4486	24.6584	24.5297	68.9724	22.5455	1.61029	1.38e-06	1.23e-05	Ets65A	3L	6097617	6123913	+	4922	protein_coding	-	Ets	78	70	69	17	24	24	0.750057	0.662864	0.720442	0.19584	0.262608	0.262485
FBgn0005659	464.439	403.709	400.623	153.015	140.758	133.891	422.924	142.555	1.56985	4.14e-23	2.48e-21	Ets98B	3R	27736538	27748366	+	3522	protein_coding	-	Ets	496	446	392	141	137	131	6.66551	5.90219	5.7199	2.26999	2.09493	2.00225
FBgn0005660	82.4005	80.5608	77.6718	6.51127	20.5486	9.19862	80.2111	12.0862	2.72464	1.07e-10	1.9e-09	Ets21C	2L	544925	552923	-	5407	protein_coding	-	Ets	88	89	76	6	20	9	0.770313	0.767188	0.722352	0.06292	0.199211	0.0896028
FBgn0005664	242.52	323.148	295.357	45.5789	70.8928	44.9711	287.009	53.8142	2.41371	2.23e-23	1.37e-21	Cry	2L	11944129	11947131	+	2261	protein_coding	-	Chitin_bind_4	259	357	289	42	69	44	5.42176	7.35928	6.56884	1.05328	1.64357	1.04758
FBgn0010019	98785.1	94048.9	101436	34430.5	33421.3	31038.2	98090.1	32963.3	1.57325	5.22e-80	2.45e-77	Cyp4g1	X	467057	469335	-	2279	protein_coding	-	p450	105498	103901	99253	31727	32529	30368	2190.99	2124.92	2238.16	789.366	768.714	717.311
FBgn0010038	149.819	125.82	196.224	33.6416	29.7955	13.2869	157.287	25.5747	2.62315	4.17e-14	1.1e-12	GstD2	3R	12371971	12372704	+	734	protein_coding	-	GST_N	160	139	192	31	29	13	10.3173	8.82646	13.443	2.39474	2.12785	0.953417
FBgn0010043	270.611	292.372	253.455	31.4711	33.9052	16.3531	272.146	27.2432	3.32374	2.87e-36	3.73e-34	GstD7	3R	12378500	12379255	+	756	protein_coding	-	GST_N	289	323	248	29	33	16	18.0933	19.9135	16.8586	2.17505	2.35088	1.13929
FBgn0010053	3081.59	2722.78	3050.66	923.515	1006.88	1003.67	2951.68	978.023	1.59326	1.32e-55	3.53e-53	Jheh1	2R	18853434	18855087	-	1486	protein_coding	-	EHN	3291	3008	2985	851	980	982	104.821	94.3467	103.233	32.4716	35.5178	35.5736
FBgn0010241	1414.85	1279.92	1167.12	307.115	289.736	273.915	1287.3	290.255	2.14968	1.81e-62	5.52e-60	Mdr50	2R	14246966	14252597	+	4256	protein_coding	-	ABC_membrane	1511	1414	1142	283	282	268	16.8037	15.4852	13.7897	3.77032	3.5685	3.38976
FBgn0010414	206.001	184.656	182.938	37.9824	62.6733	49.0593	191.198	49.905	1.9354	1.33e-15	4.18e-14	SerT	2R	24404595	24411074	-	3725	protein_coding	-	SNF	220	204	179	35	61	48	2.79536	2.55254	2.46955	0.532765	0.881946	0.693666
FBgn0010651	1619.92	1785.92	1968.37	327.734	493.167	424.159	1791.4	415.02	2.10899	4.74e-39	7.04e-37	l(2)08717	2R	18796975	18803727	-	3288	protein_coding	-	MFS_1	1730	1973	1926	302	480	415	24.9032	27.9681	30.1034	5.20797	7.86227	6.79441
FBgn0011283	330.539	279.7	303.533	49.9197	93.4963	112.428	304.591	85.2812	1.83388	4.35e-12	9.22e-11	Obp28a	2L	7496791	7497365	-	575	protein_coding	-	-	353	309	297	46	91	110	29.0568	25.0472	26.5448	4.53611	8.52339	10.2982
FBgn0011829	24.3456	25.345	31.6819	7.59648	11.3017	7.15449	27.1242	8.68424	1.63986	0.00187365	0.00685629	Ret	2L	21182446	21198762	-	4912	protein_coding	-	Pkinase_Tyr	26	28	31	7	11	7	0.250528	0.265685	0.324336	0.0808041	0.120607	0.0767141
FBgn0013771	1609.62	1378.59	1399.12	248.513	267.132	243.253	1462.44	252.966	2.53131	3.31e-90	1.62e-87	Cyp6a9	2R	14879356	14881372	-	1964	protein_coding	-	p450	1719	1523	1369	229	260	238	41.4262	36.1432	35.8223	6.61131	7.12969	6.52335
FBgn0013772	2692.06	2292.82	2679.68	263.706	138.703	147.178	2554.85	183.196	3.80367	2.65e-70	9.65e-68	Cyp6a8	2R	14887171	14889010	-	1781	protein_coding	-	p450	2875	2533	2622	243	135	144	76.4038	66.2886	75.6589	7.73635	4.08233	4.35245
FBgn0015037	2178	2131.69	2452.79	623.997	515.771	439.49	2254.16	526.419	2.09883	1.96e-47	4.09e-45	Cyp4p1	2R	9240041	9242139	+	1680	protein_coding	-	p450	2326	2355	2400	575	502	430	65.5302	65.3355	73.4165	19.4067	16.0929	13.7783
FBgn0015524	59.9277	59.7417	57.2319	8.68169	23.6309	26.5738	58.9671	19.6288	1.58149	0.00016896	0.00087171	otp	2R	20883625	20903414	-	3368	protein_coding	-	Homeobox	64	66	56	8	23	26	0.899392	0.913355	0.854491	0.134683	0.367785	0.415563
FBgn0020414	3886.87	3783.64	4314.88	1294.66	1192.85	1150.85	3995.13	1212.79	1.71999	9.92e-64	3.11e-61	Idgf3	2L	16450907	16455194	+	3954	protein_coding	-	-	4151	4180	4222	1193	1161	1126	49.6887	49.2728	54.8748	17.1079	15.8137	15.3298
FBgn0022700	652.65	528.624	649.991	169.293	230.145	184.995	610.421	194.811	1.64655	5.28e-22	2.81e-20	Cht4	2R	21065379	21067087	-	1473	protein_coding	-	CBM_14	697	584	636	156	224	181	22.396	18.479	22.1894	6.00503	8.19	6.61472
FBgn0023535	426.985	456.21	502.823	131.311	138.703	171.708	462.006	147.241	1.64825	8.62e-23	4.93e-21	arg	X	509435	528028	+	1243	protein_coding	-	-	456	504	492	121	135	168	17.3634	18.8985	20.3416	5.5196	5.84926	7.27568
FBgn0024184	52.4367	50.69	59.2759	2.17042	10.2743	18.3972	54.1342	10.2807	2.38692	9.33e-06	6.97e-05	unc-4	X	17768569	17778708	+	2999	protein_coding	-	Homeobox	56	56	58	2	10	18	0.883797	0.870321	0.993901	0.0378135	0.179582	0.323096
FBgn0025686	47.7549	68.7935	20.44	13.0225	3.0823	11.2428	45.6628	9.11587	2.33117	0.00018633	0.00094657	Amnionless	2L	287252	289144	-	1893	protein_coding	-	-	51	76	20	12	3	11	1.27515	1.87125	0.542964	0.359438	0.0853511	0.312808
FBgn0025687	382.975	415.477	504.867	100.925	160.279	147.178	434.44	136.127	1.67202	1.04e-15	3.31e-14	LKR	2L	7791175	7795959	-	3495	protein_coding	-	Saccharop_dh	409	459	494	93	156	144	5.53882	6.12116	7.26392	1.50879	2.4039	2.21794
FBgn0026190	17.791	26.2502	26.5719	5.42606	8.21945	7.15449	23.5377	6.93333	1.75962	0.00236675	0.00830771	PH4alphaMP	3R	30491813	30496153	-	1882	protein_coding	-	-	19	29	26	5	8	7	0.477832	0.718201	0.709978	0.150641	0.228933	0.200223
FBgn0026268	624.559	599.228	651.013	110.692	236.309	214.635	624.933	187.212	1.7375	4.54e-13	1.1e-11	antdh	X	11168030	11169058	-	950	protein_coding	-	adh_short	667	662	637	102	230	210	33.231	32.479	34.4594	6.08794	13.039	11.8996
FBgn0026756	55.2458	51.5951	68.4739	15.193	8.21945	7.15449	58.4383	10.189	2.52597	1.38e-08	1.8e-07	Ugt37a1	2L	20372409	20374083	-	1623	protein_coding	-	UDPGT	59	57	67	14	8	7	1.72058	1.63691	2.12152	0.489106	0.265467	0.232175
FBgn0026872	596.468	595.607	688.827	157.356	228.09	225.877	626.967	203.774	1.61968	1.71e-20	8.06e-19	CG14777	X	1466134	1468692	+	1705	protein_coding	-	Mpv17_PMP22	637	658	674	145	222	221	17.683	17.9874	20.3155	4.82211	7.01241	6.97756
FBgn0027376	6.55459	9.95696	7.15399	0	0	1.02207	7.88851	0.34069	4.39919	0.00363369	0.0119547	rha	3R	25340252	25344838	+	4288	protein_coding	-	-	7	11	7	0	0	1	0.0772653	0.119565	0.0838947	0	0	0.012554
FBgn0028430	6.55459	9.95696	18.396	2.17042	1.02743	3.06621	11.6358	2.08802	2.47343	0.0103198	0.0282698	He	2L	13972096	13972947	-	673	protein_coding	-	-	7	11	18	2	1	3	0.492294	0.761808	1.37451	0.168503	0.0800246	0.239962
FBgn0028482	531.858	400.089	571.297	118.288	208.569	190.105	501.081	172.321	1.53819	2.75e-11	5.32e-10	CG16857	2L	4324554	4331830	+	2730	protein_coding	-	I-set	568	442	559	109	203	186	9.84752	7.54619	10.523	2.2639	4.00472	3.66763
FBgn0028537	66.4823	83.2764	88.9138	5.42606	20.5486	35.7724	79.5575	20.5824	1.94481	9.16e-05	0.00051289	CG31775	2L	14737090	14737769	-	613	protein_coding	-	-	71	92	87	5	20	35	5.482	6.99512	7.29374	0.462491	1.75715	3.07357
FBgn0029172	7900.15	7288.49	8205.62	2718.46	2201.79	2100.35	7798.09	2340.2	1.73664	1.84e-45	3.46e-43	Fad2	3L	11023535	11024846	+	1312	protein_coding	-	-	8437	8052	8029	2505	2143	2055	304.365	286.047	314.499	108.26	87.9685	84.3167
FBgn0029768	430.73	388.321	528.373	143.248	146.923	167.619	449.141	152.597	1.55594	2.87e-18	1.17e-16	SPR	X	5446656	5494012	+	3730	protein_coding	-	-	460	429	517	132	143	164	5.83701	5.36064	7.12317	2.00659	2.06474	2.36685
FBgn0029791	205.065	177.415	223.818	41.238	61.6459	58.258	202.099	53.714	1.90822	1.05e-15	3.34e-14	CG4096	X	5698557	5708633	+	3992	protein_coding	-	TSP_1	219	196	219	38	60	57	2.59654	2.28841	2.81932	0.539743	0.809467	0.768634
FBgn0029898	891.424	820.091	877.896	100.925	169.526	168.641	863.137	146.364	2.55785	2.62e-41	4.28e-39	CG14439	X	6747544	6755752	+	2428	protein_coding	-	MFS_1	952	906	859	93	165	165	18.5579	17.3919	18.1818	2.17184	3.65994	3.65823
FBgn0030230	98.3188	83.2764	97.0898	22.7894	39.0424	35.7724	92.895	32.5348	1.50967	8.77e-07	8.11e-06	Rph	X	10749077	10757666	-	3997	protein_coding	-	C2	105	92	95	21	38	35	1.24336	1.07281	1.22146	0.297906	0.512021	0.471378
FBgn0030271	131.092	137.587	112.42	18.4486	31.8504	67.4566	127.033	39.2519	1.69144	2.24e-05	0.00014984	CG15202	X	11142541	11143755	+	863	protein_coding	-	-	140	152	110	17	31	66	7.67818	8.2092	6.55048	1.11694	1.93459	4.11688
FBgn0030272	674.186	587.46	676.563	93.3282	100.688	160.465	646.07	118.16	2.44912	4.71e-32	5.06e-30	CG15201	X	11144120	11144809	+	489	protein_coding	-	-	720	649	662	86	98	157	69.6891	61.8591	69.573	9.97202	10.7933	17.2833
FBgn0030300	329.602	321.338	357.699	102.01	110.963	110.383	336.213	107.785	1.64001	5.01e-23	2.96e-21	Sk1	X	11442539	11446012	+	2852	protein_coding	-	-	352	355	350	94	108	108	5.84163	5.80159	6.30681	1.86884	2.03945	2.03849
FBgn0030317	542.158	513.236	434.349	115.032	183.91	208.502	496.581	169.148	1.55257	1.31e-12	2.93e-11	CG1561	X	11581957	11584175	-	2160	protein_coding	-	-	579	567	425	106	179	204	12.6872	12.2348	10.1118	2.78257	4.46311	5.08407
FBgn0030332	808.087	666.211	800.224	159.526	163.362	155.355	758.174	159.414	2.24937	2.56e-52	6.41e-50	CG9360	X	11763474	11764590	-	1035	protein_coding	-	adh_short	863	736	783	147	159	152	39.465	33.144	38.8788	8.05324	8.27362	7.90567
FBgn0030347	869.887	841.815	772.63	193.168	233.227	218.723	828.111	215.039	1.94466	8.26e-47	1.66e-44	CG15739	X	11873319	11875346	+	1529	protein_coding	-	-	929	930	756	178	227	214	28.7574	28.3494	25.4101	6.60094	7.99571	7.53428
FBgn0030348	38.3912	37.1123	36.7919	18.4486	4.10973	13.2869	37.4318	11.9484	1.65292	0.00162997	0.0060971	CG10352	X	11875306	11877168	-	1491	protein_coding	-	-	41	41	36	17	4	13	1.30151	1.28166	1.24084	0.646494	0.144484	0.469355
FBgn0030358	117.046	131.251	105.266	30.3859	46.2344	45.9931	117.854	40.8712	1.52614	3.66e-08	4.46e-07	CG10362	X	11926424	11930850	-	3776	protein_coding	-	-	125	145	103	28	45	45	1.56682	1.7898	1.40183	0.420455	0.641829	0.641528
FBgn0030359	5.61822	15.388	26.5719	3.25564	3.0823	1.02207	15.8594	2.45333	2.69383	0.0039027	0.0126661	CG18130	X	11990118	11992768	-	2344	protein_coding	-	-	6	17	26	3	3	1	0.121153	0.338033	0.570042	0.07257	0.0689291	0.0229656
FBgn0030482	2834.39	2921.91	3316.38	744.455	1038.73	983.231	3024.23	922.14	1.71302	1.81e-32	1.98e-30	CG1673	X	13396899	13401224	+	2510	protein_coding	-	-	3027	3228	3245	686	1011	962	57.0795	59.9415	66.4404	15.4969	21.6928	20.6318
FBgn0030594	4538.58	4136.66	4549.93	1612.62	1517.52	1306.2	4408.39	1478.78	1.57599	2.08e-45	3.85e-43	CG9509	X	14906334	14909708	-	2980	protein_coding	-	-	4847	4570	4452	1486	1477	1278	76.9835	71.4772	76.7769	28.2746	26.6933	23.0861
FBgn0030661	23.4092	24.4398	20.44	6.51127	5.13716	12.2648	22.763	7.97109	1.5122	0.00906784	0.0253387	CG8105	X	15587733	15589365	+	1569	protein_coding	-	-	25	27	20	6	5	12	0.754151	0.802063	0.655086	0.216831	0.171627	0.411712
FBgn0030826	13.1092	13.5777	12.264	3.25564	2.05486	2.04414	12.9836	2.45155	2.41123	0.00416966	0.0133785	CG12995	X	17209368	17209997	-	630	protein_coding	-	-	14	15	12	3	2	2	1.05179	1.10973	0.978886	0.270007	0.170973	0.170893
FBgn0030927	137.646	83.2764	127.75	23.8747	41.0973	36.7945	116.224	33.9221	1.77277	7e-08	8.02e-07	CG15046	X	18487450	18489620	-	1817	protein_coding	-	-	147	92	125	22	40	36	3.82916	2.35994	3.53546	0.686533	1.18562	1.06655
FBgn0030929	2395.23	2066.52	2088.96	653.297	592.828	432.335	2183.57	559.487	1.96503	1.06e-34	1.28e-32	CG15043	X	18493193	18494168	-	903	protein_coding	-	-	2558	2283	2044	602	577	423	134.077	117.838	116.328	37.8009	34.4133	25.2167
FBgn0030998	170.419	152.07	180.894	36.8972	72.9477	63.3683	167.794	57.7377	1.53555	1.61e-08	2.09e-07	CG14195	X	19208694	19212082	-	2696	protein_coding	-	-	182	168	177	34	71	62	3.19516	2.90441	3.374	0.715077	1.41833	1.23796
FBgn0030999	18495.2	16043.4	19639.7	4341.93	7198.19	6764.06	18059.4	6101.39	1.56547	2.9e-18	1.18e-16	Mur18B	X	19213254	19214938	+	1615	protein_coding	-	CBM_14	19752	17724	19217	4001	7006	6618	578.868	511.514	611.511	140.472	233.634	220.592
FBgn0031033	303.384	116.768	127.75	46.6641	12.3292	10.2207	182.634	23.0713	2.98757	0.00017859	0.00091402	CG14219	X	19587348	19590170	-	2308	protein_coding	-	-	324	129	125	43	12	10	6.64432	2.60508	2.78334	1.05639	0.280017	0.233238
FBgn0031034	676.059	262.502	583.561	67.2831	35.9601	43.949	507.374	49.0641	3.37221	1.91e-22	1.04e-20	CG14205	X	19592609	19595548	+	2338	protein_coding	-	-	722	290	571	62	35	43	14.6162	5.78125	12.5511	1.50363	0.806236	0.990055
FBgn0031089	1067.46	1140.52	1093.54	220.298	458.235	440.512	1100.51	373.015	1.56009	2.11e-11	4.13e-10	CG9572	X	20148124	20155514	+	1667	protein_coding	-	-	1140	1260	1070	203	446	431	32.3676	35.2292	32.9868	6.90485	14.4091	13.918
FBgn0031178	3.74548	6.33625	11.242	0	0	1.02207	7.1079	0.34069	4.24332	0.00722156	0.021018	CG10918	X	21428614	21429256	-	643	protein_coding	-	-	4	7	11	0	0	1	0.294435	0.507405	0.879171	0	0	0.0837191
FBgn0031251	186.338	210.906	221.774	54.2606	69.8654	71.5449	206.339	65.2236	1.65918	1.52e-14	4.2e-13	CG4213	2L	396595	402198	-	4436	protein_coding	-	-	199	233	217	50	68	70	2.12326	2.44812	2.51397	0.639105	0.825574	0.849458
FBgn0031276	14.9819	34.3968	56.2099	4.34085	2.05486	1.02207	35.1962	2.47259	3.84227	2.29e-06	1.95e-05	CG12506	2L	773547	774017	+	471	protein_coding	-	-	16	38	55	4	2	1	1.60783	3.76037	6.00113	0.48154	0.22869	0.114292
FBgn0031412	105.81	126.725	108.332	10.8521	16.4389	11.2428	113.622	12.8446	3.14319	2.44e-19	1.09e-17	CG16995	2L	2307948	2308872	+	721	protein_coding	-	SCP	113	140	106	10	16	11	7.41796	9.05025	7.55548	0.786427	1.19515	0.821283
FBgn0031461	798.723	695.177	806.356	192.082	185.965	219.745	766.752	199.264	1.94333	1.4e-42	2.33e-40	daw	2L	2805261	2812376	+	3265	protein_coding	-	TGFb_propeptide	853	768	789	177	181	215	12.3654	10.9634	12.419	3.07386	2.98562	3.54479
FBgn0031468	3.74548	8.1466	7.15399	0	1.02743	0	6.34869	0.342477	4.08435	0.0102362	0.0281092	CG2975	2L	2840124	2842638	+	1884	protein_coding	-	Fringe	4	9	7	0	1	0	0.100489	0.222653	0.190945	0	0.0285863	0
FBgn0031520	331.475	353.925	428.217	67.2831	84.2494	47.0152	371.206	66.1826	2.48751	6.91e-27	5.64e-25	CG8837	2L	3320245	3323141	+	1838	protein_coding	-	Sugar_tr	354	391	419	62	82	46	9.11589	9.91515	11.7155	1.91267	2.40274	1.34725
FBgn0031542	17.791	16.2932	21.462	1.08521	5.13716	7.15449	18.5154	4.45895	2.04173	0.00470907	0.0147689	CG15414	2L	3480755	3491071	-	1402	protein_coding	-	-	19	18	21	1	5	7	0.641426	0.598401	0.769773	0.0404432	0.19207	0.268773
FBgn0031547	69.2914	39.8278	53.1439	15.193	17.4663	16.3531	54.0877	16.3375	1.72566	2.36e-05	0.00015685	Sr-CIV	2L	3522521	3524056	-	1390	protein_coding	-	Somatomedin_B	74	44	52	14	17	16	2.51975	1.47539	1.92256	0.571093	0.658677	0.619642
FBgn0031548	211.62	176.51	225.862	67.2831	67.8105	65.4124	204.664	66.8354	1.61353	3.28e-14	8.79e-13	CG8852	2L	3525131	3527588	+	2398	protein_coding	-	-	226	195	221	62	66	64	4.46067	3.79012	4.73625	1.46601	1.48229	1.4367
FBgn0031725	29.9638	39.8278	25.5499	5.42606	11.3017	9.19862	31.7805	8.64214	1.87621	0.00038916	0.00180912	CG14010	2L	5601723	5617946	-	2988	protein_coding	-	I-set	32	44	25	5	11	9	0.506886	0.686341	0.429983	0.0948818	0.198267	0.162143
FBgn0031735	144.201	108.621	118.552	32.5564	44.1796	54.1697	123.791	43.6352	1.50167	1.09e-07	1.2e-06	CG11029	2L	5746157	5747961	+	1805	protein_coding	-	Lipase_GDSL	154	120	116	30	43	53	4.03817	3.09865	3.30272	0.942405	1.28301	1.58064
FBgn0031801	3770.76	3723	4254.58	415.636	417.137	500.814	3916.11	444.529	3.13853	2.19e-151	2.74e-148	CG9498	2L	6349393	6351034	-	1514	protein_coding	-	-	4027	4113	4163	383	406	490	125.892	126.62	141.31	14.3439	14.4424	17.4223
FBgn0031805	282.784	259.786	296.379	29.3007	106.853	100.163	279.65	78.7721	1.8254	4.27e-07	4.21e-06	CG9505	2L	6367882	6370190	+	2309	protein_coding	-	-	302	287	290	27	104	98	6.19048	5.7933	6.45454	0.66303	2.42576	2.28474
FBgn0031808	82.4005	108.621	117.53	11.9373	33.9052	31.6842	102.851	25.8422	1.9872	1.59e-07	1.71e-06	CG9507	2L	6381266	6383419	+	2154	protein_coding	-	-	88	120	115	11	33	31	1.93365	2.59659	2.74374	0.289561	0.825101	0.774732
FBgn0031858	182.592	188.277	180.894	46.6641	87.3317	57.2359	183.921	63.7439	1.52676	2.75e-09	3.99e-08	CG17378	2L	6774041	6778444	+	3254	protein_coding	-	-	195	208	177	43	85	56	2.83634	2.9793	2.79542	0.749281	1.40682	0.926416
FBgn0031887	45.8821	38.9226	56.2099	8.68169	19.5212	14.309	47.0049	14.1706	1.72346	9.84e-05	0.00054492	CG11289	2L	7067983	7069546	+	1513	protein_coding	-	UDPGT	49	43	55	8	19	14	1.53285	1.32464	1.86816	0.299809	0.676322	0.498109
FBgn0031902	147.01	135.777	162.498	39.0676	56.5087	57.2359	148.428	50.9374	1.5395	6.66e-10	1.07e-08	Wnt6	2L	7333714	7352542	+	2855	protein_coding	-	wnt	157	150	159	36	55	56	2.60276	2.4488	2.86208	0.714973	1.03752	1.05589
FBgn0031910	543.094	586.555	593.781	219.213	192.13	181.928	574.477	197.757	1.53937	1.8e-27	1.51e-25	CG15818	2L	7410909	7412229	+	1321	protein_coding	-	Lectin_C	580	648	581	202	187	178	20.781	22.8634	22.6029	8.67046	7.6239	7.25358
FBgn0031926	60.864	81.466	84.8258	10.8521	23.6309	14.309	75.7186	16.264	2.21442	1.66e-08	2.14e-07	CG6739	2L	7608389	7616533	+	2718	protein_coding	-	Fz	65	90	83	10	23	14	1.13189	1.54334	1.56935	0.208614	0.45574	0.277277
FBgn0032181	71.1641	56.121	71.5399	4.34085	33.9052	21.4635	66.275	19.9032	1.73007	0.00108775	0.00434063	CG13133	2L	10091208	10092389	-	1182	protein_coding	-	-	76	62	70	4	33	21	3.04325	2.44479	3.04349	0.191883	1.50361	0.956395
FBgn0032381	2214.51	1501.69	2216.71	476.408	358.574	382.254	1977.64	405.745	2.28544	4.15e-36	5.25e-34	Mal-B1	2L	11847226	11849169	+	1814	protein_coding	-	-	2365	1659	2169	439	349	374	61.7071	42.6262	61.4488	13.7221	10.3616	11.0986
FBgn0032415	14.9819	11.7673	11.242	0	2.05486	4.08828	12.6637	2.04771	2.61262	0.00606041	0.0181828	rho-6	2L	12130516	12133411	-	944	protein_coding	-	Rhomboid	16	13	11	0	2	4	0.802212	0.641858	0.598842	0	0.114103	0.228099
FBgn0032536	278.102	256.165	304.555	83.5613	101.716	107.317	279.608	97.5314	1.5172	9.37e-16	3e-14	Ance-3	2L	13914725	13956188	+	3426	protein_coding	-	Peptidase_M2	297	283	298	77	99	105	4.10308	3.85006	4.47013	1.27437	1.55628	1.64982
FBgn0032638	29.9638	35.3019	29.6379	5.42606	7.19202	4.08828	31.6346	5.56879	2.50698	8.35e-06	6.29e-05	SPH93	2L	17454263	17455923	-	1587	protein_coding	-	Trypsin	32	39	29	5	7	4	0.954364	1.1454	0.939101	0.178643	0.237553	0.135681
FBgn0032652	407.321	389.226	456.833	72.7092	61.6459	59.28	417.793	64.545	2.69556	1.69e-47	3.6e-45	CG6870	2L	17591315	17592299	-	985	protein_coding	-	-	435	430	447	67	60	58	20.9023	20.347	23.3218	3.85684	3.2806	3.16977
FBgn0032706	1615.24	1466.39	1566.72	218.128	232.2	268.804	1549.45	239.71	2.69142	4.98e-102	3.3e-99	Irk3	2L	18711071	18713748	-	2096	protein_coding	-	-	1725	1620	1533	201	226	263	38.9528	36.024	37.5874	5.43749	5.80705	6.7546
FBgn0032753	39.3275	47.9744	54.1659	8.68169	18.4938	19.4193	47.1559	15.5316	1.59601	0.00024343	0.00119575	CG17572	2L	19071131	19074149	-	1344	protein_coding	-	Trypsin	42	53	53	8	18	19	1.47908	1.838	2.0266	0.337508	0.721293	0.761009
FBgn0032800	255.629	282.415	305.577	59.6866	118.155	90.9642	281.207	89.6018	1.64754	1.75e-11	3.48e-10	CG10137	2L	19526686	19532985	+	3227	protein_coding	-	-	273	312	299	55	115	89	4.0041	4.50634	4.76172	0.966401	1.91928	1.48466
FBgn0032809	109.555	135.777	98.1118	19.5338	15.4115	12.2648	114.481	15.7367	2.86828	6.99e-17	2.49e-15	CG13078	2L	19563930	19565158	+	910	protein_coding	-	Cytochrom_B561	117	150	96	18	15	12	6.08535	7.68277	5.42152	1.12157	0.887746	0.709864
FBgn0032834	18.7274	20.8191	39.8579	7.59648	4.10973	5.11035	26.4681	5.60552	2.24004	0.00045807	0.00207477	CG13965	2L	19961758	19962352	-	535	protein_coding	-	-	20	23	39	7	4	5	1.76936	2.00374	3.7463	0.741887	0.402666	0.503097
FBgn0032973	63.6731	63.3625	48.0339	13.0225	11.3017	34.7504	58.3565	19.6915	1.56509	0.00079148	0.00331587	CG6675	2L	22108964	22110449	+	1425	protein_coding	-	Lipase	68	70	47	12	11	34	2.25858	2.28955	1.69502	0.477485	0.415735	1.2844
FBgn0033058	14.9819	18.1036	17.374	5.42606	2.05486	4.08828	16.8198	3.8564	2.13075	0.00312579	0.0105263	CCHa2-R	2R	6050949	6068680	+	2935	protein_coding	-	7tm_1	16	20	17	5	2	4	0.25802	0.317607	0.297668	0.0965952	0.0366995	0.0733647
FBgn0033190	19.6638	16.2932	13.286	0	7.19202	5.11035	16.4143	4.10079	1.99066	0.0161001	0.0408313	CG2137	2R	7535919	7538297	+	2379	protein_coding	-	DAO	21	18	13	0	7	5	0.417798	0.352652	0.280828	0	0.158468	0.113139
FBgn0033204	861.46	789.315	976.008	85.7317	114.045	106.295	875.594	102.024	3.09911	4.17e-77	1.88e-74	CG2065	2R	7663786	7665269	+	1233	protein_coding	-	adh_short	920	872	955	79	111	104	35.3155	32.9626	39.8045	3.63293	4.8484	4.54052
FBgn0033205	1176.08	1000.22	1065.94	353.779	348.299	268.804	1080.75	323.628	1.74015	1.42e-32	1.57e-30	CG2064	2R	7665828	7667343	+	1210	protein_coding	-	adh_short	1256	1105	1043	326	339	263	49.1298	42.5642	44.2986	15.2766	15.0887	11.7005
FBgn0033215	595.531	623.668	710.289	16.2782	18.4938	28.6179	643.162	21.13	4.92229	1.08e-91	5.8e-89	CG1942	2R	7712578	7714182	+	1305	protein_coding	-	-	636	689	695	15	18	28	23.0668	24.608	27.3694	0.65174	0.742849	1.155
FBgn0033234	785.614	831.858	846.214	186.656	264.05	240.186	821.229	230.298	1.83294	2.61e-33	2.97e-31	CG8791	2R	7926653	7929922	+	2420	protein_coding	-	MFS_1	839	919	828	172	257	235	16.4092	17.6998	17.5835	4.03001	5.71948	5.22743
FBgn0033301	187.274	157.501	182.938	66.1979	55.4813	50.0814	175.904	57.2535	1.62061	1.08e-12	2.45e-11	CG12780	2R	8551859	8552290	-	432	protein_coding	-	-	200	174	179	61	54	49	21.9123	18.773	21.2942	8.00644	6.73207	6.10587
FBgn0033302	63.6731	57.9314	68.4739	26.0451	23.6309	12.2648	63.3595	20.6469	1.6201	1.81e-05	0.00012438	Cyp6a14	2R	8564187	8567202	-	2959	protein_coding	-	p450	68	64	67	24	23	12	1.08769	1.0081	1.16365	0.459896	0.418621	0.218309
FBgn0033391	8.42733	1.81036	9.19798	0	0	1.02207	6.47855	0.34069	4.10956	0.012956	0.0339712	CG8026	2R	9186670	9192096	-	3003	protein_coding	-	Mito_carr	9	2	9	0	0	1	0.14185	0.0310415	0.154021	0	0	0.0179259
FBgn0033397	382.039	459.83	481.361	138.907	96.5786	87.898	441.077	107.795	2.03474	1.16e-22	6.51e-21	Cyp4p3	2R	9242320	9244410	+	1667	protein_coding	-	p450	408	508	471	128	94	86	11.5842	14.2035	14.5203	4.35379	3.0369	2.77714
FBgn0033500	25.282	18.1036	20.44	4.34085	6.16459	4.08828	21.2752	4.86457	2.12726	0.00086658	0.00358259	CG12913	2R	10249220	10255495	+	2523	protein_coding	-	-	27	20	20	4	6	4	0.50651	0.369471	0.407384	0.0898952	0.128077	0.085345
FBgn0033515	23.4092	16.2932	31.6819	3.25564	7.19202	9.19862	23.7948	6.54876	1.85135	0.00320431	0.0107586	Ir47a	2R	10377128	10380109	-	2982	protein_coding	-	-	25	18	31	3	7	9	0.396802	0.281341	0.534251	0.0570436	0.126424	0.162469
FBgn0033558	45.8821	68.7935	68.4739	19.5338	18.4938	16.3531	61.0498	18.1269	1.75231	3.84e-06	3.12e-05	CG12344	2R	10827430	10835709	-	2905	protein_coding	-	Neur_chan_LBD	49	76	67	18	18	16	0.798346	1.21937	1.18528	0.351334	0.333707	0.296489
FBgn0033578	14.9819	12.6725	20.44	2.17042	4.10973	6.13242	16.0315	4.13752	1.94386	0.00801804	0.022893	BBS4	2R	11135923	11139315	+	1520	protein_coding	-	-	16	14	20	2	4	6	0.498216	0.429292	0.676204	0.0746071	0.141728	0.212492
FBgn0033602	136.71	120.389	108.332	40.1528	40.0698	47.0152	121.81	42.4126	1.52223	3.85e-09	5.48e-08	Cpr47Ee	2R	11265126	11266856	+	1386	protein_coding	-	Chitin_bind_4	146	133	106	37	39	46	4.98575	4.47256	3.93038	1.51367	1.51544	1.78661
FBgn0033603	151.692	103.19	99.1338	14.1078	28.7681	34.7504	118.005	25.8754	2.18504	1.71e-09	2.57e-08	Cpr47Ef	2R	11266915	11272575	-	2198	protein_coding	-	Chitin_bind_4	162	114	97	13	28	34	3.48842	2.41738	2.26796	0.335358	0.686071	0.832696
FBgn0033782	731.305	655.349	611.155	120.459	230.145	230.988	665.936	193.864	1.77905	8.59e-15	2.44e-13	sug	2R	12924567	12930644	+	1572	protein_coding	-	zf-C2H2	781	724	598	111	224	226	23.5147	21.4661	19.5497	4.00372	7.67422	7.73911
FBgn0033788	6205.32	5380.38	5598.5	1653.86	1486.69	1314.38	5728.07	1484.98	1.94783	1.51e-61	4.49e-59	CG13323	2R	13044695	13047256	-	2562	protein_coding	-	-	6627	5944	5478	1524	1447	1286	122.428	108.135	109.884	33.7287	30.4178	27.0207
FBgn0033789	747.223	541.296	591.737	80.3057	89.3866	32.7062	626.752	67.4661	3.21712	1.3e-28	1.18e-26	CG13324	2R	13049146	13049656	-	511	protein_coding	-	-	798	598	579	74	87	32	73.9134	54.5441	58.2303	8.21116	9.16932	3.37104
FBgn0033873	374.548	371.123	330.105	106.351	98.6334	119.582	358.592	108.189	1.72911	4.59e-24	3.06e-22	CG6337	2R	13833575	13835096	-	1402	protein_coding	-	Peptidase_C1	400	410	323	98	96	117	13.5037	13.6302	11.8398	3.96343	3.68775	4.49235
FBgn0033932	25.282	31.6812	25.5499	6.51127	8.21945	11.2428	27.5044	8.65783	1.66518	0.00154535	0.00582503	Dh44-R1	2R	14378097	14385359	+	2475	protein_coding	-	7tm_2	27	35	25	6	8	11	0.516333	0.659114	0.519106	0.137458	0.174082	0.239251
FBgn0033949	104.873	104.095	126.728	31.4711	46.2344	33.7283	111.899	37.1446	1.58816	1.78e-08	2.28e-07	CG10131	2R	14629910	14631023	+	1058	protein_coding	-	3HCDH_N	112	115	124	29	45	33	5.01041	5.06617	6.0232	1.5542	2.29069	1.67905
FBgn0033970	132.028	84.1815	121.618	29.3007	40.0698	45.9931	112.609	38.4546	1.54669	5.64e-07	5.4e-06	CG10205	2R	14832832	14833951	+	904	protein_coding	-	-	141	93	119	27	39	45	7.3823	4.79493	6.76503	1.69351	2.32346	2.67966
FBgn0033981	9112.75	8394.62	8327.24	247.428	164.389	144.112	8611.54	185.31	5.54049	1.06e-228	3.98e-225	Cyp6a21	2R	14885264	14886947	-	1631	protein_coding	-	p450	9732	9274	8148	228	160	141	282.416	265.021	256.737	7.92637	5.28329	4.65372
FBgn0033985	30.9002	31.6812	26.5719	9.76691	8.21945	13.2869	29.7178	10.4244	1.5115	0.00208145	0.00747837	CG10257	2R	14942398	14944469	+	1377	protein_coding	-	-	33	35	26	9	8	13	1.13428	1.18468	0.970355	0.370597	0.312892	0.508212
FBgn0034139	44.9457	44.3537	56.2099	18.4486	12.3292	15.331	48.5031	15.3696	1.65881	3.86e-05	0.00024114	CG4927	2R	16572082	16574154	+	1449	protein_coding	-	Trypsin	48	49	55	17	12	15	1.56788	1.57614	1.95068	0.665233	0.446017	0.557261
FBgn0034160	247.202	293.278	373.029	103.095	114.045	86.8759	304.503	101.339	1.58646	5.01e-13	1.2e-11	CG5550	2R	16816589	16817577	+	938	protein_coding	-	Fibrinogen_C	264	324	365	95	111	85	13.3212	16.0994	19.9978	5.74268	6.37322	4.87811
FBgn0034289	4714.62	4038.9	4385.39	413.466	433.576	357.724	4379.64	401.589	3.44723	3.09e-186	6.97e-183	CG10910	2R	18020268	18022406	+	1991	protein_coding	-	-	5035	4462	4291	381	422	350	119.693	104.454	110.759	10.8504	11.4151	9.46307
FBgn0034290	508.449	418.192	551.879	116.118	167.471	171.708	492.84	151.766	1.69722	6.26e-18	2.46e-16	CG5773	2R	18042296	18043744	-	1357	protein_coding	-	-	543	462	540	107	163	168	18.9392	15.8683	20.4506	4.47093	6.46914	6.66446
FBgn0034382	692.914	731.384	681.673	287.581	132.539	156.377	701.99	192.165	1.87074	7.43e-14	1.94e-12	CG18609	2R	18742517	18743626	-	989	protein_coding	-	ELO	740	808	667	265	129	153	35.4141	38.0788	34.6594	15.193	7.02477	8.3278
FBgn0034479	1078.7	909.704	1317.36	322.308	355.491	325.018	1101.92	334.272	1.72023	1.06e-26	8.48e-25	CG8654	2R	19979242	19984895	+	3178	protein_coding	-	Sugar_tr	1152	1005	1289	297	346	318	17.1569	14.7394	20.8445	5.29903	5.86355	5.38652
FBgn0034538	908.279	928.712	1018.93	392.847	318.504	294.356	951.974	335.235	1.50645	9.12e-26	6.81e-24	CG16799	2R	20652557	20655096	-	1288	protein_coding	-	-	970	1026	997	362	310	288	35.6449	37.1278	39.7805	15.9363	12.9624	12.0368
FBgn0034622	27.1547	23.5346	30.6599	7.59648	10.2743	9.19862	27.1164	9.02314	1.58357	0.00209666	0.00751865	CG15666	2R	21341972	21345608	+	2947	protein_coding	-	-	29	26	30	7	10	9	0.465757	0.411208	0.523158	0.134683	0.18275	0.164398
FBgn0034624	17.791	11.7673	22.484	2.17042	7.19202	1.02207	17.3474	3.4615	2.31854	0.00464085	0.0145874	CG17974	2R	21348945	21350578	-	1033	protein_coding	-	SCP	19	13	22	2	7	1	0.870551	0.586558	1.0945	0.10978	0.364953	0.0521117
FBgn0034660	61.8004	59.7417	45.9899	15.193	20.5486	15.331	55.844	17.0242	1.71434	7.84e-06	5.96e-05	lox2	2R	21789623	21791580	-	1729	protein_coding	-	SRCR	66	66	45	14	20	15	1.80672	1.77917	1.33755	0.45912	0.622979	0.467016
FBgn0034670	9.3637	13.5777	12.264	2.17042	3.0823	2.04414	11.7351	2.43229	2.26912	0.00888398	0.02493	CG13488	2R	21951592	21952562	+	898	protein_coding	-	-	10	15	12	2	3	2	0.527066	0.778543	0.686746	0.126284	0.179922	0.119892
FBgn0034711	3312.88	3827.09	4126.83	355.949	450.015	455.843	3755.6	420.602	3.15772	3.17e-115	2.23e-112	CG3290	2R	22206005	22207987	-	1762	protein_coding	-	-	3538	4228	4038	328	438	446	95.0371	111.84	117.775	10.5551	13.3877	13.6259
FBgn0034716	2190.17	2062	2640.84	307.115	391.451	384.298	2297.67	360.955	2.66934	9.41e-74	3.79e-71	Oatp58Dc	2R	22223681	22228574	-	3138	protein_coding	-	-	2339	2278	2584	283	381	376	35.2792	33.8352	42.3186	5.1136	6.53899	6.45016
FBgn0034766	24.3456	31.6812	39.8579	5.42606	5.13716	14.309	31.9616	8.29073	1.94026	0.00071351	0.0030343	Obp59a	2R	22702695	22703786	+	1011	protein_coding	-	-	26	35	39	5	5	14	1.2172	1.61356	1.98246	0.280422	0.266353	0.745439
FBgn0034785	59.9277	42.5434	48.0339	7.59648	17.4663	22.4855	50.1683	15.8494	1.65656	0.00024445	0.00119968	CG3649	2R	22845977	22847911	+	1569	protein_coding	-	MFS_1	64	47	47	7	17	22	1.93063	1.39618	1.53945	0.25297	0.583532	0.754806
FBgn0034860	2915.86	2788.85	3264.26	619.656	875.372	864.671	2989.66	786.566	1.92577	1.14e-37	1.58e-35	CG9812	2R	23412320	23419684	-	1574	protein_coding	-	-	3114	3081	3194	571	852	846	93.6386	91.2336	104.285	20.5696	29.1523	28.9335
FBgn0034865	17.791	12.6725	17.374	7.59648	3.0823	4.08828	15.9458	4.92235	1.70153	0.0152286	0.0389715	Or59b	2R	23470165	23471775	-	1499	protein_coding	-	-	19	14	17	7	3	4	0.59992	0.435306	0.582826	0.264783	0.107785	0.143646
FBgn0034909	226.601	200.949	253.455	51.005	62.6733	47.0152	227.002	53.5645	2.08194	2.07e-20	9.56e-19	CG4797	2R	23812185	23818327	-	2106	protein_coding	-	Sugar_tr	242	222	248	47	61	46	5.43874	4.91318	6.0518	1.26542	1.55995	1.1758
FBgn0035050	49.6276	50.69	50.0779	14.1078	12.3292	24.5297	50.1318	16.9889	1.55875	0.0001302	0.00069805	ST6Gal	2R	24691422	24694386	-	2229	protein_coding	-	Glyco_transf_29	53	56	49	13	12	24	1.1254	1.17097	1.12974	0.330694	0.289941	0.579611
FBgn0035144	155.437	141.208	158.41	53.1754	50.3442	40.8828	151.685	48.1341	1.65679	2.73e-12	5.91e-11	Kah	3L	582824	589274	-	2825	protein_coding	-	zf-C2H2	166	156	155	49	49	40	2.78119	2.5738	2.81971	0.983493	0.934149	0.762214
FBgn0035154	4484.27	4200.93	4364.95	818.25	1196.96	1106.9	4350.05	1040.7	2.06308	2.35e-46	4.57e-44	CG3344	3L	685942	687958	-	1480	protein_coding	-	Peptidase_S10	4789	4641	4271	754	1165	1083	153.153	146.156	148.306	28.887	42.3938	39.3915
FBgn0035171	79.5914	92.3281	82.7818	28.2155	32.8778	28.6179	84.9005	29.9038	1.50534	3.29e-07	3.34e-06	CG12502	3L	865396	871701	+	3743	protein_coding	-	-	85	102	81	26	32	28	1.07483	1.27013	1.11213	0.393865	0.460435	0.402693
FBgn0035176	7664.19	8233.5	8047.21	264.792	205.486	191.127	7981.63	220.468	5.1799	0	0	CG13905	3L	902898	903810	+	913	protein_coding	-	-	8185	9096	7874	244	200	187	424.316	464.352	443.217	15.1535	11.7977	11.0257
FBgn0035193	54.3094	37.1123	40.8799	6.51127	9.24689	8.17656	44.1006	7.97824	2.46393	4.08e-07	4.04e-06	CG9192	3L	1237133	1238319	-	1187	protein_coding	-	-	58	41	40	6	9	8	2.3127	1.60991	1.73181	0.286612	0.408348	0.362806
FBgn0035282	10.3001	14.4828	27.5939	6.51127	4.10973	4.08828	17.459	4.90309	1.8314	0.0119055	0.0317725	CNMa	3L	1850915	1855591	-	1900	protein_coding	-	-	11	16	27	6	4	4	0.274019	0.392495	0.730301	0.179057	0.113382	0.113329
FBgn0035348	3889.68	3333.77	3873.37	869.255	1131.2	1112.01	3698.94	1037.49	1.8336	3.72e-43	6.35e-41	CG16758	3L	2499372	2503606	-	1985	protein_coding	-	-	4154	3683	3790	801	1101	1088	99.0483	86.4787	98.1228	22.8805	29.8721	29.5056
FBgn0035358	468.185	487.891	515.087	82.4761	127.402	173.752	490.388	127.876	1.9371	1.67e-16	5.79e-15	CG14949	3L	2642184	2643424	-	934	protein_coding	-	-	500	539	504	76	124	170	25.3375	26.8974	27.7316	4.61382	7.15012	9.798
FBgn0035359	466.312	470.692	556.989	142.163	150.005	183.972	497.998	158.713	1.64816	8.5e-23	4.89e-21	CG1143	3L	2645368	2647192	+	1657	protein_coding	-	-	498	520	545	131	146	180	14.2249	14.6268	16.9031	4.48273	4.74536	5.8477
FBgn0035382	17.791	25.345	18.396	4.34085	2.05486	2.04414	20.5107	2.81328	2.87734	0.0001365	0.00072854	Or63a	3L	2961534	2963788	+	1718	protein_coding	-	-	19	28	18	4	2	2	0.523446	0.759631	0.538444	0.132017	0.0626968	0.0626675
FBgn0035453	10.3001	21.7243	17.374	3.25564	7.19202	5.11035	16.4661	5.186	1.66281	0.0185093	0.045768	CG10357	3L	3615382	3616682	+	1111	protein_coding	-	Lipase	11	24	17	3	7	5	0.468619	1.00685	0.786369	0.153109	0.33933	0.242265
FBgn0035587	185.401	146.639	192.136	36.8972	58.5636	69.5007	174.725	54.9872	1.66419	1.05e-09	1.62e-08	CG4623	3L	5141953	5144317	+	1597	protein_coding	-	-	198	162	188	34	57	68	5.86815	4.72801	6.04985	1.20717	1.92224	2.29213
FBgn0035607	30.9002	23.5346	28.6159	2.17042	4.10973	7.15449	27.6836	4.47821	2.61838	3.55e-05	0.00022355	CG4835	3L	5479790	5483663	+	3735	protein_coding	-	CBM_14	33	26	28	2	4	7	0.418181	0.324452	0.385264	0.0303622	0.0576777	0.100889
FBgn0035673	1015.02	964.92	1176.32	349.438	306.175	302.533	1052.09	319.382	1.72002	7.08e-37	9.51e-35	CG6602	3L	6072139	6073539	+	1401	protein_coding	-	-	1084	1066	1151	322	298	296	36.6212	35.4639	42.221	13.032	11.4556	11.3734
FBgn0035693	30.9002	17.1984	24.5279	6.51127	3.0823	8.17656	24.2088	5.92337	2.03092	0.001234	0.00481892	CG8219	3L	6200473	6203776	+	2805	protein_coding	-	-	33	19	24	6	3	8	0.556829	0.31571	0.439714	0.121286	0.0576006	0.15353
FBgn0035779	1968.25	1780.48	2023.56	551.288	691.462	774.729	1924.1	672.493	1.51594	2.23e-26	1.77e-24	CG8562	3L	7398285	7399912	+	1483	protein_coding	-	-	2102	1967	1980	508	673	758	67.0861	61.8203	68.6144	19.423	24.4406	27.5146
FBgn0035904	1985.1	1930.74	2079.77	291.922	343.162	313.775	1998.54	316.286	2.65886	9.76e-125	7.34e-122	GstO3	3L	8518885	8520295	+	881	protein_coding	-	-	2120	2133	2035	269	334	307	113.894	112.845	118.708	17.3129	20.4178	18.7585
FBgn0035929	161.992	146.639	149.212	58.6014	43.1521	42.9269	152.614	48.2268	1.66463	5.81e-12	1.22e-10	CG13311	3L	8801540	8802164	-	568	protein_coding	-	-	173	162	146	54	42	42	14.4158	13.2934	13.2098	5.39062	3.98235	3.98049
FBgn0036031	13.1092	30.776	16.352	0	8.21945	3.06621	20.0791	3.76189	2.40718	0.00564346	0.0172065	CG6761	3L	9700517	9703595	-	2854	protein_coding	-	-	14	34	16	0	8	3	0.232175	0.555255	0.288109	0	0.150964	0.0565852
FBgn0036040	52.4367	60.6469	59.2759	19.5338	16.4389	18.3972	57.4532	18.1233	1.66544	4.06e-06	3.28e-05	CG6749	3L	9731238	9733807	-	1834	protein_coding	-	-	56	67	58	18	16	18	1.44521	1.70272	1.62525	0.556502	0.46985	0.528334
FBgn0036348	16.8547	10.8621	12.264	0	5.13716	3.06621	13.3269	2.73446	2.27166	0.0122748	0.0325576	CG17687	3L	13349165	13354940	+	4812	protein_coding	-	-	18	12	12	0	5	3	0.177047	0.116231	0.128158	0	0.0559607	0.0335607
FBgn0036360	20.6001	23.5346	33.7259	7.59648	12.3292	4.08828	25.9536	8.00465	1.6944	0.00414529	0.0133079	CG10713	3L	13428839	13435229	-	2534	protein_coding	-	-	22	26	33	7	12	4	0.41092	0.478228	0.669266	0.156634	0.255043	0.0849745
FBgn0036361	30.9002	11.7673	56.2099	3.25564	9.24689	0	32.9591	4.16751	2.97953	0.00067439	0.00288863	CG10154	3L	13435680	13437136	-	1165	protein_coding	-	CBM_14	33	13	55	3	9	0	1.34069	0.520098	2.42621	0.146012	0.416059	0
FBgn0036362	1698.57	1243.71	2078.74	416.721	356.519	283.113	1673.68	352.118	2.24911	8.45e-28	7.33e-26	CG10725	3L	13437954	13439009	+	876	protein_coding	-	CBM_14	1814	1374	2034	384	347	277	98.0109	73.1056	119.327	24.8554	21.3336	17.022
FBgn0036363	20.6001	16.2932	21.462	2.17042	2.05486	0	19.4518	1.40843	3.79925	5.35e-05	0.00032029	CG10140	3L	13439317	13440470	-	969	protein_coding	-	CBM_14	22	18	21	2	2	0	1.07458	0.865798	1.11375	0.117031	0.111159	0
FBgn0036411	30.9002	20.8191	34.7479	1.08521	6.16459	3.06621	28.8224	3.43867	3.0543	1.21e-05	8.77e-05	Sox21a	3L	14103481	14108118	-	2335	protein_coding	-	HMG_box	33	23	34	1	6	3	0.668911	0.459102	0.748313	0.0242832	0.138389	0.0691623
FBgn0036501	836.178	857.203	810.444	316.882	277.407	284.135	834.609	292.808	1.51203	9.11e-36	1.13e-33	CG7272	3L	15500938	15503769	+	1191	protein_coding	-	-	893	947	793	292	270	278	35.4879	37.0601	34.2179	13.9016	12.2093	12.5652
FBgn0036575	26.2184	13.5777	25.5499	3.25564	6.16459	6.13242	21.782	5.18421	2.0632	0.00176112	0.00651639	CG5157	3L	16136487	16137879	-	1393	protein_coding	-	-	28	15	25	3	6	6	0.951367	0.501889	0.922317	0.122113	0.231974	0.231865
FBgn0036656	28.0911	28.0605	52.1219	2.17042	5.13716	9.19862	36.0912	5.50207	2.70147	1.53e-05	0.00010694	CG13026	3L	16724678	16726169	-	1431	protein_coding	-	-	30	31	51	2	5	9	0.992254	1.00969	1.83156	0.0792472	0.188178	0.338562
FBgn0036727	901.724	1044.58	1072.08	200.764	169.526	161.487	1006.13	177.259	2.50594	1.69e-65	5.77e-63	CG7589	3L	17470127	17474517	+	2249	protein_coding	-	Neur_chan_LBD	963	1154	1049	185	165	158	20.2665	23.9158	23.9705	4.66419	3.95124	3.78184
FBgn0036750	8.42733	4.52589	9.19798	0	1.02743	0	7.38373	0.342477	4.29964	0.00535568	0.0164716	CG6034	3L	17745173	17746860	-	1688	protein_coding	-	Amino_oxidase	9	5	9	0	1	0	0.252355	0.138059	0.274007	0	0.0319055	0
FBgn0036759	847.415	735.004	848.258	223.554	303.092	278.003	810.226	268.216	1.59369	1.28e-25	9.47e-24	CG5577	3L	17838650	17841427	-	2162	protein_coding	-	-	905	812	830	206	295	272	19.8123	17.5052	19.7294	5.40263	7.34861	6.77249
FBgn0036859	4.68185	9.95696	10.22	0	0	0	8.28626	0	5.42961	0.00052505	0.00232306	CG14085	3L	19269351	19274168	+	2948	protein_coding	-	-	5	11	10	0	0	0	0.0802756	0.173913	0.174327	0	0	0
FBgn0036937	44.9457	45.2589	52.1219	11.9373	13.3566	16.3531	47.4422	13.8824	1.76971	1.31e-05	9.36e-05	Ir76b	3L	20108484	20111534	-	2308	protein_coding	-	Lig_chan	48	50	51	11	13	16	0.984343	1.00972	1.1356	0.27024	0.303352	0.373181
FBgn0036948	675.123	537.676	452.745	145.418	88.3591	103.229	555.181	112.336	2.30736	2.09e-24	1.42e-22	CG7298	3L	20202070	20203687	-	1323	protein_coding	-	CBM_14	721	594	443	134	86	101	25.7939	20.9264	17.2082	5.743	3.50088	4.10958
FBgn0037166	911.088	939.575	959.656	158.441	156.17	163.531	936.773	159.381	2.55501	4.78e-91	2.45e-88	CG11426	3L	22470556	22473509	+	1882	protein_coding	-	-	973	1038	939	146	152	160	24.47	25.7067	25.6411	4.39872	4.34973	4.57652
FBgn0037174	97.3825	94.1385	83.8038	17.3634	28.7681	16.3531	91.7749	20.8282	2.13836	2.25e-10	3.82e-09	CG14457	3L	22669956	22680034	+	1557	protein_coding	-	-	104	104	82	16	28	16	3.16145	3.11324	2.70655	0.582673	0.968519	0.55318
FBgn0037485	841.796	719.616	793.07	92.243	128.429	149.222	784.828	123.298	2.6679	7.35e-49	1.66e-46	CG14606	3R	7214339	7217083	-	1925	protein_coding	-	Sugar_tr	899	795	776	85	125	146	22.104	19.2488	20.7168	2.5037	3.49718	4.08279
FBgn0037547	2517.9	2549.89	2708.29	830.187	959.621	876.936	2592.03	888.915	1.54359	9.58e-53	2.46e-50	CG7910	3R	8087252	8089526	+	1976	protein_coding	-	Amidase	2689	2817	2650	765	934	858	64.4088	66.4458	68.9208	21.9517	25.4565	23.3741
FBgn0037563	681.677	620.047	787.96	197.509	241.446	243.253	696.561	227.402	1.61351	1.01e-24	6.98e-23	CG11672	3R	8289395	8290578	-	1122	protein_coding	-	-	728	685	771	182	235	238	30.71	28.4555	35.3145	9.19755	11.2801	11.4188
FBgn0037712	44.9457	38.0175	44.9679	8.68169	12.3292	21.4635	42.6437	14.1581	1.58513	0.00048697	0.0021846	CG16789	3R	9566195	9569189	+	2734	protein_coding	-	AAA	48	42	44	8	12	21	0.830967	0.716009	0.827076	0.165915	0.236386	0.413482
FBgn0037726	109.555	103.19	128.772	19.5338	47.2619	39.8607	113.839	35.5521	1.67415	4.62e-07	4.53e-06	CG9492	3R	9651179	9674643	-	14650	protein_coding	-	Dynein_heavy	117	114	126	18	46	39	0.377998	0.36269	0.442002	0.0696672	0.169106	0.143305
FBgn0037974	66.4823	40.733	75.6278	34.7268	10.2743	13.2869	60.9477	19.4293	1.65371	0.00089105	0.00366896	CG12224	3R	11980704	11982622	-	1628	protein_coding	-	Aldo_ket_red	71	45	74	32	10	13	2.06417	1.28833	2.33598	1.11452	0.330814	0.429857
FBgn0038074	6384.17	6071.03	6757.45	335.33	273.297	177.84	6404.22	262.156	4.61171	4.68e-134	4.06e-131	Gnmt	3R	12674608	12676084	+	990	protein_coding	-	-	6818	6707	6612	309	266	174	325.959	315.763	343.233	17.6977	14.4706	9.46127
FBgn0038082	1972.93	1723.46	1524.82	247.428	129.456	104.251	1740.4	160.379	3.44187	2.63e-40	4.11e-38	CG5724	3R	12739642	12741417	+	1710	protein_coding	-	UDPGT	2107	1904	1492	228	126	102	58.3189	51.8966	44.8399	7.56018	3.96838	3.21099
FBgn0038198	843.669	805.608	902.424	232.235	291.791	293.334	850.567	272.453	1.64109	6.72e-32	7.09e-30	Npc2b	3R	14089517	14092425	+	922	protein_coding	-	-	901	890	883	214	284	287	46.2525	44.9911	49.2177	13.1606	16.5892	16.7566
FBgn0038236	88.9551	105.906	55.1879	49.9197	11.3017	26.5738	83.3496	29.2651	1.51517	0.00164306	0.00612777	Cyp313a1	3R	14521049	14523064	+	1623	protein_coding	-	p450	95	117	54	46	11	26	2.77042	3.35997	1.70988	1.60706	0.365017	0.862363
FBgn0038238	36.5184	28.0605	32.7039	3.25564	9.24689	7.15449	32.4276	6.55234	2.29929	3.63e-05	0.00022813	CG14854	3R	14559166	14560054	-	663	protein_coding	-	-	39	31	32	3	9	7	2.78415	2.1793	2.48044	0.256567	0.731085	0.568355
FBgn0038337	1195.74	1251.86	1517.67	401.528	517.826	397.585	1321.76	438.98	1.58965	1.18e-24	8.13e-23	CG6125	3R	15402598	15407070	-	2532	protein_coding	-	Sulfate_transp	1277	1383	1485	370	504	389	23.8709	25.4581	30.1408	8.28575	10.7203	8.2703
FBgn0038353	8397.36	8386.47	8816.78	2500.33	2670.29	2389.6	8533.54	2520.07	1.75963	1.83e-93	1.08e-90	CG5399	3R	15695241	15697142	+	1546	protein_coding	-	-	8968	9265	8627	2304	2599	2338	274.554	279.321	286.775	84.5019	90.5389	81.4086
FBgn0038354	123.601	132.156	127.75	41.238	35.9601	49.0593	127.836	42.0858	1.60257	2.26e-10	3.84e-09	CG5404	3R	15704676	15708434	+	2762	protein_coding	-	Sulfate_transp	132	146	125	38	35	48	2.26199	2.46375	2.32583	0.780106	0.682469	0.93552
FBgn0038431	35.5821	34.3968	53.1439	15.193	9.24689	11.2428	41.0409	11.8942	1.78742	0.00012022	0.00065106	CG10405	3R	16454492	16455797	+	929	protein_coding	-	Trypsin	38	38	52	14	9	11	1.93602	1.9065	2.8766	0.854488	0.521754	0.6374
FBgn0038449	875.506	872.591	870.742	275.644	271.242	241.208	872.946	262.698	1.733	8.17e-47	1.66e-44	CG17562	3R	16615309	16617154	+	1674	protein_coding	-	NAD_binding_4	935	964	852	254	264	236	26.4361	26.8404	26.1563	8.60343	8.49351	7.58913
FBgn0038450	3206.13	3038.68	3528.96	1000.57	1069.56	938.26	3257.92	1002.79	1.69977	5.46e-57	1.5e-54	CG17560	3R	16617950	16619878	+	1712	protein_coding	-	NAD_binding_4	3424	3357	3453	922	1041	918	94.661	91.3935	103.654	30.5366	32.7481	28.8652
FBgn0038484	147.946	108.621	136.948	16.2782	49.3167	45.9931	131.172	37.196	1.81383	7.72e-07	7.23e-06	CG5246	3R	17136111	17137195	+	1085	protein_coding	-	Trypsin	158	120	134	15	48	45	6.89237	5.15489	6.34697	0.78389	2.38259	2.23264
FBgn0038621	26.2184	13.5777	17.374	1.08521	7.19202	4.08828	19.0567	4.12184	2.19936	0.0036896	0.0120893	CG10864	3R	18410080	18411631	-	1552	protein_coding	-	Ion_trans_2	28	15	17	1	7	4	0.853901	0.450472	0.562923	0.0365344	0.24291	0.138741
FBgn0038652	1751.01	1624.79	2010.27	536.095	444.878	500.814	1795.36	493.929	1.86195	7e-46	1.34e-43	CG7720	3R	18759236	18795169	-	3261	protein_coding	-	-	1870	1795	1967	494	433	490	27.1414	25.6556	30.9988	8.58954	7.15115	8.08874
FBgn0038658	10930.2	11150	12540.9	1839.43	2041.51	1901.05	11540.4	1927.33	2.58187	8.13e-153	1.15e-149	CG14292	3R	18904933	18905655	-	648	protein_coding	-	-	11673	12318	12271	1695	1987	1860	852.606	885.999	973.187	148.316	165.144	154.516
FBgn0038753	51.5003	41.6382	66.4299	10.8521	5.13716	15.331	53.1895	10.4401	2.34691	1.05e-06	9.57e-06	CG4459	3R	19926322	19928644	-	2062	protein_coding	-	MFS_1	55	46	65	10	5	15	1.26245	1.03977	1.62	0.274982	0.130593	0.391596
FBgn0038814	11.2364	12.6725	13.286	2.17042	3.0823	4.08828	12.3983	3.11367	1.9879	0.0131395	0.0343663	CG15923	3R	20611251	20616901	-	4319	protein_coding	-	-	12	14	13	2	3	4	0.131504	0.151082	0.154686	0.0262567	0.037409	0.0498554
FBgn0038820	552.458	555.779	596.847	100.925	247.611	247.341	568.361	198.626	1.51544	5.65e-08	6.58e-07	CG4000	3R	20676224	20677351	-	999	protein_coding	-	-	590	614	584	93	241	242	27.953	28.6464	30.0427	5.27851	12.9924	13.0402
FBgn0038840	302.447	339.442	315.797	99.8395	107.88	101.185	319.229	102.968	1.63233	5.02e-22	2.69e-20	CG5621	3R	20901956	20908263	+	3640	protein_coding	-	Lig_chan	323	375	309	92	105	99	4.19993	4.80173	4.36263	1.43311	1.55355	1.46409
FBgn0039053	14.0455	15.388	20.44	1.08521	5.13716	6.13242	16.6245	4.11826	2.00085	0.00760179	0.0219349	CG6738	3R	23099533	23100983	+	1291	protein_coding	-	Peptidase_M20	15	17	20	1	5	6	0.549928	0.613749	0.796151	0.0439205	0.208585	0.250184
FBgn0039091	625.495	385.606	315.797	68.3683	19.5212	16.3531	442.299	34.7476	3.67236	1.17e-07	1.28e-06	CG10182	3R	23587120	23589819	-	2212	protein_coding	-	-	668	426	309	63	19	16	14.2933	8.9762	7.17901	1.61491	0.462602	0.389377
FBgn0039151	1367.1	1360.48	1538.11	371.142	439.741	544.763	1421.9	451.882	1.65295	9.06e-27	7.3e-25	CG13607	3R	24114043	24116322	-	2212	protein_coding	-	-	1460	1503	1505	342	428	533	31.2398	31.6695	34.9657	8.76667	10.4207	12.9711
FBgn0039152	380.166	480.649	372.007	86.8169	71.9202	142.068	410.941	100.268	2.03448	5.62e-16	1.84e-14	Rootletin	3R	24113286	24128193	+	7408	protein_coding	-	-	406	531	364	80	70	139	2.59398	3.34088	2.52518	0.612326	0.508904	1.01006
FBgn0039184	1252.86	1154.1	1301	260.451	392.479	355.68	1235.99	336.203	1.87715	1.41e-31	1.45e-29	CG6432	3R	24336922	24340645	+	2715	protein_coding	-	AMP-binding	1338	1275	1273	240	382	348	23.3253	21.8881	24.0963	5.01228	7.57761	6.89993
FBgn0039232	1479.46	1442.85	1503.36	581.673	391.451	455.843	1475.23	476.323	1.63163	6.12e-27	5.04e-25	sosie	3R	24833952	24840488	+	2151	protein_coding	-	-	1580	1594	1471	536	381	446	34.7662	34.5395	35.145	14.1292	9.53945	11.1617
FBgn0039298	1080.57	1083.5	1273.41	398.273	323.641	321.952	1145.83	347.955	1.71985	1.62e-34	1.92e-32	to	3R	25240180	25241668	+	1253	protein_coding	-	-	1154	1197	1246	367	315	315	43.5909	44.5257	51.1044	16.6077	13.5394	13.533
FBgn0039310	1242.56	966.73	1149.75	248.513	213.706	223.833	1119.68	228.684	2.29207	4.86e-55	1.27e-52	CG11878	3R	25273837	25275237	+	1345	protein_coding	-	-	1327	1068	1125	229	208	219	46.6971	37.0098	42.9855	9.65399	8.32875	8.76511
FBgn0039321	1371.78	1238.28	1282.61	301.689	312.339	304.577	1297.56	306.202	2.0831	1.06e-76	4.61e-74	CG10550	3R	25306407	25308391	-	1594	protein_coding	-	-	1465	1368	1255	278	304	298	43.5001	40.0005	40.462	9.88895	10.2713	10.0638
FBgn0039386	14.0455	17.1984	15.33	4.34085	5.13716	6.13242	15.5246	5.20347	1.5751	0.0182276	0.0452305	CG5948	3R	25895822	25897174	+	951	protein_coding	-	-	15	19	15	4	5	6	0.746538	0.931196	0.810592	0.238492	0.283158	0.33963
FBgn0039453	38.3912	36.2071	33.7259	6.51127	10.2743	14.309	36.1081	10.3649	1.79592	0.00018912	0.00095757	CG6403	3R	26735417	26736307	-	749	protein_coding	-	-	41	40	33	6	10	14	2.59086	2.48912	2.26425	0.454217	0.719046	1.00619
FBgn0039510	44.9457	53.4055	50.0779	16.2782	16.4389	19.4193	49.4764	17.3788	1.50863	6.91e-05	0.00040006	CG3339	3R	27294286	27322325	-	14788	protein_coding	-	Dynein_heavy	48	59	49	15	16	19	0.153629	0.185956	0.170286	0.0575142	0.0582706	0.0691639
FBgn0039595	115.173	66.078	108.332	13.0225	38.015	34.7504	96.5277	28.596	1.75016	2.02e-05	0.0001368	AstA-R2	3R	28737109	28744782	-	2356	protein_coding	-	7tm_1	123	73	106	12	37	34	2.47099	1.44416	2.31218	0.288802	0.845795	0.776853
FBgn0039596	56.1822	41.6382	54.1659	22.7894	13.3566	17.3752	50.6621	17.8404	1.50783	0.00015011	0.00079071	CG10000	3R	28748384	28751661	-	2597	protein_coding	-	Glycos_transf_2	60	46	53	21	13	17	1.0935	0.82557	1.04881	0.458502	0.269594	0.352381
FBgn0039787	179.783	178.32	166.586	33.6416	59.591	68.4786	174.896	53.9038	1.69488	3.58e-10	5.92e-09	CG9702	3R	30579429	30582117	+	2318	protein_coding	-	Sulfate_transp	192	197	163	31	58	67	3.92039	3.96114	3.61381	0.758301	1.34758	1.55595
FBgn0039850	18.7274	11.7673	19.418	4.34085	3.0823	7.15449	16.6376	4.85921	1.77121	0.0115796	0.0310495	CG11333	3R	31463301	31464134	+	715	protein_coding	-	Isochorismatase	20	13	19	4	3	7	1.32393	0.847433	1.36565	0.31721	0.225972	0.52702
FBgn0039872	5001.15	4379.25	5637.34	576.247	580.499	564.182	5005.91	573.643	3.12529	1.36e-146	1.53e-143	salt	3R	31751825	31754705	-	2114	protein_coding	-	-	5341	4838	5516	531	565	552	119.58	106.667	134.094	14.2424	14.394	14.0563
FBgn0039873	1859.63	1523.41	2216.71	493.771	612.349	640.838	1866.59	582.319	1.67986	6.11e-24	4.01e-22	Smvt	3R	31759404	31761579	-	1996	protein_coding	-	-	1986	1683	2169	455	596	627	47.0934	39.2999	55.8458	12.9254	16.0814	16.91
FBgn0040069	218.174	162.932	218.708	95.4986	47.2619	67.4566	199.938	70.0724	1.51436	5.36e-08	6.27e-07	vanin-like	X	6200188	6202559	-	1864	protein_coding	-	CN_hydrolase	233	180	214	88	46	66	5.91631	4.50085	5.9001	2.67689	1.32908	1.90605
FBgn0040257	161.992	156.596	134.904	83.5613	28.7681	21.4635	151.164	44.5976	1.76548	3.34e-05	0.00021182	Ugt86Dc	3R	11154626	11156513	+	1595	protein_coding	-	UDPGT	173	173	132	77	28	21	5.13365	5.05537	4.25309	2.73731	0.945444	0.708752
FBgn0040261	25.282	28.0605	26.5719	0	0	0	26.6381	0	7.11541	4.15e-08	4.98e-07	Ugt36Bb	2L	16796595	16798273	+	1620	protein_coding	-	UDPGT	27	31	26	0	0	0	0.788842	0.891897	0.824802	0	0	0
FBgn0040262	87.0824	90.5178	104.244	16.2782	21.5761	20.4414	93.948	19.4319	2.27001	2.13e-12	4.64e-11	Ugt36Ba	2L	16794211	16796009	+	1799	protein_coding	-	UDPGT	93	100	102	15	21	20	2.44677	2.59082	2.9138	0.472774	0.628676	0.598459
FBgn0040348	94.5733	105.906	86.8698	19.5338	33.9052	37.8166	95.783	30.4185	1.65174	2.46e-07	2.56e-06	CG3703	X	942474	945773	-	2496	protein_coding	-	RUN	101	117	85	18	33	37	1.91522	2.18479	1.75011	0.408904	0.712046	0.797981
FBgn0040363	44.9457	29.8709	26.5719	13.0225	7.19202	13.2869	33.7962	11.1672	1.60065	0.00151282	0.0057273	CG11384	X	1173877	1176035	-	2159	protein_coding	-	-	48	33	26	12	7	13	1.05228	0.712409	0.618888	0.315154	0.174616	0.324135
FBgn0040531	26.2184	33.4916	71.5399	15.193	5.13716	12.2648	43.7499	10.865	2.0098	0.00050481	0.00224675	CG11741	3R	8528423	8528877	-	455	protein_coding	-	-	28	37	70	14	5	12	2.91265	3.79017	7.90639	1.74466	0.59183	1.41973
FBgn0040601	22.4729	13.5777	26.5719	2.17042	10.2743	7.15449	20.8742	6.53308	1.66573	0.0141516	0.036564	CG13643	3R	24897685	24906004	-	3284	protein_coding	-	CBM_14	24	15	26	2	10	7	0.345899	0.21289	0.406876	0.0345319	0.163997	0.114744
FBgn0040609	255.629	279.7	356.677	66.1979	69.8654	81.7656	297.335	72.6096	2.0318	4.77e-21	2.34e-19	CG3348	3R	27291535	27292209	-	543	protein_coding	-	-	273	309	349	61	68	80	23.796	26.5232	33.0306	6.36977	6.74447	7.93096
FBgn0040658	228.474	265.217	255.499	62.9423	68.8379	72.5669	249.73	68.1157	1.87333	1.96e-21	1.01e-19	CG13516	2R	22669145	22670622	+	1319	protein_coding	-	-	244	293	250	58	67	71	8.75561	10.3536	9.74062	2.49331	2.7357	2.89767
FBgn0040725	29.9638	17.1984	35.7699	0	13.3566	7.15449	27.644	6.83703	2.00581	0.010405	0.0284617	CG13946	2L	776536	776941	+	406	protein_coding	-	-	32	19	35	0	13	7	3.73048	2.1812	4.4303	0	1.72447	0.928127
FBgn0040817	98.3188	107.716	111.398	28.2155	23.6309	48.0373	105.811	33.2946	1.66595	1.93e-07	2.04e-06	CG14132	3L	11712229	11715285	-	894	protein_coding	-	-	105	119	109	26	23	47	5.55895	6.20408	6.26586	1.64903	1.38557	2.83006
FBgn0041184	726.623	636.34	761.388	154.1	250.693	215.657	708.117	206.817	1.77407	2.2e-21	1.11e-19	Socs36E	2L	18138675	18152417	-	3503	protein_coding	-	SH2	776	703	745	142	244	211	10.4849	9.35369	10.9297	2.29849	3.75136	3.24248
FBgn0041579	60.864	35.3019	100.156	26.0451	23.6309	14.309	65.4406	21.3283	1.61615	0.00054433	0.00239711	AttC	2R	13393705	13394667	+	900	protein_coding	-	-	65	39	98	24	23	14	3.41831	2.01971	5.59597	1.51204	1.37633	0.837377
FBgn0042086	205.065	219.053	220.752	68.3683	76.0299	48.0373	214.957	64.1452	1.74542	7.8e-15	2.22e-13	Tsp42Eb	2R	6998848	6999848	+	865	protein_coding	-	Tetraspannin	219	242	216	63	74	47	11.9831	13.0397	12.833	4.1297	4.60738	2.92494
FBgn0042627	5379.44	4967.62	5408.41	1009.25	1569.92	1427.83	5251.82	1335.66	1.97495	7.19e-36	9.01e-34	v(2)k05816	2L	3043947	3056143	+	8161	protein_coding	-	ketoacyl-synt	5745	5488	5292	930	1528	1397	33.3187	31.3429	33.3248	6.4615	10.0837	9.21485
FBgn0044810	58.0549	76.9401	28.6159	16.2782	16.4389	7.15449	54.537	13.2905	2.04225	7.64e-05	0.0004363	TotX	3R	20904917	20905518	-	602	protein_coding	-	-	62	85	28	15	16	7	4.87457	6.58098	2.3903	1.41282	1.4314	0.625946
FBgn0050090	29.0275	13.5777	23.506	5.42606	4.10973	6.13242	22.037	5.22273	2.07567	0.00152726	0.00576648	CG30090	2R	15689826	15691014	+	999	protein_coding	-	Trypsin	31	15	23	5	4	6	1.46871	0.699832	1.18319	0.283791	0.215642	0.323312
FBgn0050160	186.338	88.7074	68.4739	13.0225	30.823	13.2869	114.506	19.0441	2.58661	6.89e-08	7.91e-07	CG30160	2R	7005157	7006136	+	844	protein_coding	-	Tetraspannin	199	98	67	12	30	13	11.1597	5.41192	4.07966	0.806181	1.91433	0.829156
FBgn0050263	28.0911	27.1553	25.5499	4.34085	12.3292	10.2207	26.9321	8.96357	1.58133	0.00376324	0.0122806	stum	2R	21674901	21685000	+	6868	protein_coding	-	-	30	30	25	4	12	10	0.206744	0.203591	0.187069	0.0330235	0.0941	0.07838
FBgn0050345	531.858	493.322	645.903	155.185	172.609	180.906	557.028	169.567	1.71438	4.52e-25	3.23e-23	CG30345	2R	9148689	9151892	+	2217	protein_coding	-	MFS_1	568	545	632	143	168	177	12.1262	11.4577	14.6502	3.65733	4.08115	4.29777
FBgn0050489	721.005	678.883	733.794	339.671	163.362	166.597	711.228	223.21	1.67324	6.05e-11	1.11e-09	Cyp12d1-p	2R	11117225	11121884	-	4482	protein_coding	-	p450	770	750	718	313	159	163	8.1313	7.79933	8.23273	3.95973	1.91057	1.95772
FBgn0050495	138.583	148.449	152.278	31.4711	56.5087	51.1035	146.437	46.3611	1.65576	5.51e-10	8.96e-09	CG30495	2R	7656895	7659061	+	1939	protein_coding	-	adh_short	148	164	149	29	55	50	3.61264	3.94216	3.94912	0.848035	1.52765	1.38812
FBgn0051106	313.684	290.562	362.809	51.005	60.6185	74.6111	322.352	62.0782	2.37345	4.36e-29	4.14e-27	CG31106	3R	25216297	25218708	+	1676	protein_coding	-	MFS_1	335	321	355	47	59	73	9.46045	8.92686	10.8854	1.59007	1.89591	2.34468
FBgn0051272	1366.16	1329.71	1609.65	95.4986	88.3591	111.406	1435.17	98.4211	3.86526	1.31e-134	1.23e-131	CG31272	3R	10756296	10759398	-	2102	protein_coding	-	MFS_1	1459	1469	1575	88	86	109	32.8521	32.5729	38.507	2.3738	2.20346	2.79145
FBgn0051288	1030.01	1152.29	1096.6	355.949	309.257	273.915	1092.97	313.04	1.8048	9.74e-41	1.57e-38	CG31288	3R	25297960	25299557	-	1377	protein_coding	-	-	1100	1273	1073	328	301	268	37.8094	43.0886	40.0458	13.5062	11.7726	10.477
FBgn0051785	9.3637	12.6725	13.286	3.25564	1.02743	1.02207	11.7741	1.76838	2.74918	0.00443997	0.0140618	CG31785	2L	18124098	18125749	-	1487	protein_coding	-	-	10	14	13	3	1	1	0.318295	0.438819	0.449287	0.114394	0.0362183	0.0362013
FBgn0051974	995.361	999.316	955.568	354.864	331.86	340.349	983.415	342.358	1.52278	3.62e-43	6.27e-41	CG31974	2L	141077	143091	-	1908	protein_coding	-	-	1063	1104	935	327	323	333	26.3691	26.9686	25.184	9.71769	9.11723	9.3951
FBgn0052037	57.1186	43.4485	68.4739	11.9373	14.384	20.4414	56.347	15.5876	1.84855	7.24e-06	5.54e-05	CG32037	3L	9489502	9492215	-	1836	protein_coding	-	-	61	48	67	11	14	20	1.57253	1.21853	1.8754	0.339714	0.410671	0.586398
FBgn0052271	28.0911	28.0605	43.9459	6.51127	6.16459	5.11035	33.3658	5.92874	2.4913	9.66e-06	7.17e-05	CG32271	3L	3202238	3203162	-	925	protein_coding	-	Trypsin	30	31	43	6	6	5	1.53504	1.56202	2.38901	0.367793	0.34934	0.29098
FBgn0052283	25.282	15.388	45.9899	10.8521	0	0	28.8866	3.61737	3.01375	0.00357748	0.0118042	Drsl3	3L	3314996	3315355	+	360	protein_coding	-	-	27	17	45	10	0	0	3.54979	2.20097	6.42394	1.57504	0	0
FBgn0052392	46.8185	27.1553	42.9239	10.8521	14.384	11.2428	38.9659	12.1596	1.67714	0.00033767	0.00159473	CG32392	3L	6756629	6763246	-	2831	protein_coding	-	-	50	30	42	10	14	11	0.835933	0.493912	0.762432	0.200287	0.266334	0.209165
FBgn0052432	292.147	263.407	297.401	79.2205	93.4963	127.759	284.318	100.158	1.50305	1.28e-12	2.87e-11	CG32432	3L	20844332	20885188	-	4487	protein_coding	-	Ldl_recept_a	312	291	291	73	91	125	3.29109	3.02277	3.33295	0.922487	1.09225	1.49965
FBgn0052557	390.466	310.476	425.151	96.5838	94.5237	103.229	375.364	98.1122	1.93464	4.88e-24	3.24e-22	CG32557	X	17852958	17856129	-	2131	protein_coding	-	-	417	343	416	89	92	101	9.26176	7.50203	10.0323	2.3681	2.32511	2.55137
FBgn0052633	46.8185	38.0175	59.2759	5.42606	4.10973	5.11035	48.0373	4.88204	3.29828	1.68e-09	2.53e-08	CG32633	X	13561671	13563359	+	1441	protein_coding	-	-	50	42	58	5	4	5	1.64228	1.35848	2.0685	0.196743	0.149498	0.186785
FBgn0052656	5070.44	5011.97	5679.24	1070.02	1809.31	1679.26	5253.88	1519.53	1.78949	2.83e-23	1.73e-21	Muc11A	X	12059795	12065144	+	4865	protein_coding	-	-	5415	5537	5557	986	1761	1643	52.6813	53.0468	58.7015	11.4918	19.4946	18.1798
FBgn0052751	81.4642	93.2333	116.508	5.42606	7.19202	21.4635	97.0684	11.3605	3.08655	1.58e-11	3.17e-10	CG32751	X	6196580	6198654	-	1758	protein_coding	-	CN_hydrolase	87	103	114	5	7	21	2.34229	2.73078	3.33256	0.161267	0.214446	0.643037
FBgn0053110	485.976	477.934	586.627	130.225	137.676	134.913	516.846	134.271	1.94347	1.41e-33	1.62e-31	CG33110	3R	22570188	22580392	+	2005	protein_coding	-	ELO	519	528	574	120	134	132	12.2516	12.274	14.7126	3.3936	3.59939	3.54401
FBgn0053199	15.9183	13.5777	29.6379	5.42606	6.16459	9.19862	19.7113	6.92976	1.50017	0.0200716	0.0489655	CG33199	2R	8947681	8951086	-	1523	protein_coding	-	-	17	15	29	5	6	9	0.528312	0.459049	0.978565	0.18615	0.212173	0.318111
FBgn0053281	218.174	192.803	237.104	49.9197	75.0025	86.8759	216.027	70.5994	1.61017	2.48e-11	4.84e-10	CG33281	2L	3324237	3326637	+	1594	protein_coding	-	Sugar_tr	233	213	232	46	73	85	6.91845	6.22815	7.47982	1.6363	2.46645	2.87056
FBgn0053293	27.1547	16.2932	33.7259	2.17042	8.21945	13.2869	25.7246	7.89226	1.69442	0.0103596	0.0283719	CG33293	3R	5240014	5240735	-	661	protein_coding	-	-	29	18	33	2	8	13	2.07653	1.26923	2.56569	0.171562	0.651819	1.05871
FBgn0053503	99.2552	92.3281	82.7818	22.7894	19.5212	24.5297	91.4551	22.2801	2.03833	7.4e-11	1.34e-09	Cyp12d1-d	2R	11123658	11125647	-	1812	protein_coding	-	p450	106	102	81	21	19	24	2.76878	2.62367	2.2973	0.657135	0.564721	0.712998
FBgn0053509	235.965	221.769	270.829	60.7719	52.399	56.2138	242.854	56.4616	2.1047	1.62e-23	1.02e-21	CG33509	2L	21084605	21086506	-	1405	protein_coding	-	-	252	245	265	56	51	55	8.48917	8.12751	9.69306	2.25998	1.95494	2.10728
FBgn0053542	18.7274	14.4828	25.5499	4.34085	3.0823	2.04414	19.5867	3.15576	2.63718	0.00040453	0.00186888	upd3	X	18277233	18284596	+	2221	protein_coding	-	-	20	16	25	4	3	2	0.426209	0.335768	0.578473	0.102119	0.0727464	0.0484749
FBgn0053696	19.6638	24.4398	19.418	5.42606	7.19202	8.17656	21.1738	6.93155	1.60933	0.00575443	0.0174599	CNMaR	3L	9644109	9659433	+	2704	protein_coding	-	7tm_1	21	27	19	5	7	8	0.367582	0.465398	0.361109	0.104847	0.139422	0.159264
FBgn0058198	137.646	143.018	156.366	61.8571	30.823	54.1697	145.677	48.9499	1.57515	2.46e-08	3.09e-07	CG40198	3R	4160610	4162235	-	1567	protein_coding	-	-	147	158	153	57	30	53	4.44007	4.69955	5.01781	2.06253	1.03108	1.82072
FBgn0063496	139.519	113.147	115.486	14.1078	45.207	34.7504	122.717	31.355	1.96418	7.58e-08	8.63e-07	GstE4	2R	18403248	18404086	+	839	protein_coding	-	GST_C	149	125	113	13	44	34	8.40554	6.9441	6.92162	0.878567	2.82442	2.18149
FBgn0063497	4585.4	3738.38	4191.21	905.067	746.943	651.058	4171.67	767.689	2.44245	1.27e-64	4.21e-62	GstE3	2R	18400713	18401467	+	755	protein_coding	-	GST_C	4897	4130	4101	834	727	637	306.99	254.959	279.148	62.6344	51.8592	45.418
FBgn0063923	632.05	491.512	630.573	153.015	185.965	135.935	584.711	158.305	1.88442	1.82e-25	1.32e-23	Kaz1-ORFB	3L	216625	218058	+	1276	protein_coding	-	-	675	543	617	141	181	133	25.0377	19.8343	24.85	6.26559	7.63953	5.61095
FBgn0082954	7.49096	6.33625	11.242	1.08521	1.02743	0	8.35639	0.704214	3.57788	0.00800503	0.0228675	snoRNA:Psi28S-3571	3R	5597596	5597739	-	144	snoRNA	-	-	8	7	11	1	1	0	2.62947	2.26571	3.92574	0.39376	0.374004	0
FBgn0083945	142.328	136.682	182.938	22.7894	47.2619	51.1035	153.983	40.3849	1.92598	7.69e-10	1.21e-08	CG34109	2L	10094088	10125736	+	2551	protein_coding	-	-	152	151	179	21	46	50	2.82016	2.75889	3.60607	0.466769	0.971149	1.0551
FBgn0083981	22.4729	19.0087	29.6379	2.17042	11.3017	6.13242	23.7065	6.53486	1.84922	0.00455915	0.0143746	RunxA	X	20590252	20623773	-	4831	protein_coding	-	Runt	24	21	29	2	11	6	0.235134	0.202605	0.308498	0.023474	0.122629	0.0668574
FBgn0085227	366.121	343.062	321.929	145.418	104.798	88.92	343.704	113.045	1.60674	7.43e-15	2.13e-13	CG34198	2R	19682446	19682977	-	532	protein_coding	-	-	391	379	315	134	102	87	34.7861	33.2044	30.4292	14.2819	10.3259	8.80325
FBgn0085246	268.738	265.217	412.887	10.8521	8.21945	10.2207	315.614	9.76409	5.01545	1.16e-43	2.04e-41	CG34217	2R	8227990	8228727	-	738	protein_coding	-	-	287	293	404	10	8	10	18.4063	18.5046	28.133	0.768311	0.583811	0.729422
FBgn0085313	546.84	601.038	588.671	105.266	94.5237	123.67	578.85	107.82	2.42413	1.67e-51	4.08e-49	CG34284	3R	18902338	18902933	-	520	protein_coding	-	-	584	664	576	97	92	121	53.1558	59.5158	56.926	10.577	9.52847	12.5261
FBgn0085417	29.9638	25.345	25.5499	3.25564	14.384	7.15449	26.9529	8.26472	1.69909	0.00432277	0.0137446	natalisin	3R	14418593	14421865	+	1999	protein_coding	-	-	32	28	25	3	14	7	0.757667	0.65285	0.642715	0.0850946	0.377185	0.188504
FBgn0085419	180.719	132.156	168.63	40.1528	43.1521	34.7504	160.502	39.3518	2.02769	5.87e-15	1.69e-13	Rgk2	2R	18539585	18548969	+	4909	protein_coding	-	Ras	193	146	165	37	42	34	1.86082	1.38621	1.72736	0.427368	0.460781	0.372839
FBgn0085440	44.0094	53.4055	43.9459	14.1078	11.3017	17.3752	47.1203	14.2616	1.72487	2.73e-05	0.00017754	CG34411	X	13161714	13189164	-	2975	protein_coding	-	7tm_1	47	59	43	13	11	17	0.747742	0.924343	0.742802	0.247771	0.199134	0.307608
FBgn0250757	4044.18	3924.85	4539.71	986.457	1026.4	1042.51	4169.58	1018.46	2.03324	3.92e-92	2.21e-89	CG42235	3R	25907022	25921046	+	8363	protein_coding	-	-	4319	4336	4442	909	999	1020	24.4434	24.1655	27.2966	6.16304	6.43342	6.56559
FBgn0259140	106.746	117.673	65.4079	27.1303	20.5486	22.4855	96.609	23.3882	2.0505	7.25e-09	9.79e-08	CG42255	3L	11801951	11814755	-	11198	protein_coding	-	CUB	114	130	64	25	20	22	0.481843	0.541092	0.293718	0.126588	0.0961896	0.105759
FBgn0259167	44.0094	28.0605	36.7919	11.9373	10.2743	12.2648	36.2873	11.4922	1.65833	0.00037544	0.00175329	CG42272	3L	5803033	5805749	+	2418	protein_coding	-	-	47	31	36	11	10	12	0.919989	0.597549	0.765134	0.257947	0.222732	0.267153
FBgn0259210	138.583	134.872	166.586	23.8747	66.7831	50.0814	146.68	46.913	1.64069	9.69e-07	8.9e-06	prom	2R	24415410	24428387	-	4379	protein_coding	-	Prominin	148	149	163	22	65	49	1.59966	1.58591	1.91295	0.284866	0.799424	0.602361
FBgn0259219	441.03	418.192	480.339	123.714	156.17	168.641	446.52	149.508	1.57652	1.07e-20	5.13e-19	CG42319	2R	13260101	13266336	+	3541	protein_coding	-	PDZ	471	462	470	114	152	165	6.29559	6.08113	6.82124	1.82546	2.31183	2.50838
FBgn0259716	594.595	509.615	614.221	125.885	132.539	146.156	572.81	134.86	2.08533	6.6e-40	1.02e-37	CG42370	2L	6383435	6385512	-	2078	protein_coding	-	-	635	563	601	116	129	143	14.4634	12.6279	14.8635	3.16524	3.34336	3.70447
FBgn0259736	2172.38	1875.53	2249.42	581.673	716.12	748.155	2099.11	681.983	1.62133	2.75e-33	3.1e-31	CG42390	3R	22120061	22133367	+	5439	protein_coding	-	-	2320	2072	2201	536	697	732	20.1888	17.7557	20.7966	5.58778	6.90164	7.24482
FBgn0259918	84.2733	57.9314	76.6498	11.9373	17.4663	43.949	72.9515	24.4509	1.57264	0.00068654	0.00293622	inaF-B	X	11724668	11732770	-	3113	protein_coding	-	-	90	64	75	11	17	43	1.36837	0.958228	1.23815	0.200358	0.294109	0.743575
FBgn0259977	301.511	279.7	295.357	81.3909	122.264	77.6773	292.189	93.7775	1.63853	1.31e-14	3.63e-13	Tdc1	2R	6677001	6680391	-	2281	protein_coding	-	-	322	309	289	75	119	76	6.68147	6.31395	6.51124	1.86436	2.8097	1.79359
FBgn0260954	191.019	238.062	288.203	31.4711	52.399	56.2138	239.095	46.6947	2.35224	8.24e-18	3.18e-16	CG42586	2L	14741161	14741840	-	613	protein_coding	-	-	204	263	282	29	51	55	15.7511	19.9969	23.6418	2.68245	4.48073	4.82989
FBgn0262565	20.6001	58.8366	32.7039	6.51127	8.21945	3.06621	37.3802	5.93231	2.65913	2.88e-05	0.00018646	CR43105	2R	15374846	15375702	-	802	pseudogene	-	-	22	65	32	6	8	3	1.29834	3.77752	2.05053	0.4242	0.537223	0.201364
FBgn0262599	42.1366	58.8366	60.2979	15.193	23.6309	17.3752	53.757	18.733	1.51808	0.00010205	0.00056309	CG43129	2L	10850141	10854604	+	2417	protein_coding	-	-	45	65	59	14	23	17	0.881205	1.25344	1.25449	0.328432	0.512495	0.378624
FBgn0262741	51.5003	44.3537	60.2979	15.193	15.4115	21.4635	52.0506	17.356	1.5808	4.92e-05	0.00029806	MRE23	3R	28586048	28591386	+	5339	lincRNA	-	-	55	49	59	14	15	21	0.487578	0.427764	0.567915	0.148683	0.151311	0.211736
FBgn0262794	10.3001	24.4398	25.5499	1.08521	4.10973	0	20.0966	1.73165	3.5311	0.00023884	0.00117728	CG43175	3R	17630717	17645262	+	684	protein_coding	-	-	11	27	25	1	4	0	0.761163	1.83982	1.87834	0.0828967	0.314951	0
FBgn0263316	1030.94	897.936	974.986	260.451	260.968	275.959	967.955	265.792	1.86429	2.02e-51	4.86e-49	Mrp4	3R	11569250	11575937	+	4726	protein_coding	-	ABC_membrane	1101	992	954	240	254	270	11.0264	9.78331	10.374	2.87946	2.89453	3.07543
FBgn0263402	53.3731	31.6812	52.1219	8.68169	9.24689	3.06621	45.7254	6.99826	2.71059	5.36e-07	5.17e-06	CG43448	3R	30237094	30237734	-	529	protein_coding	-	-	57	35	51	8	9	3	5.09988	3.08376	4.95457	0.857488	0.916274	0.305282
FBgn0263412	27.1547	17.1984	29.6379	2.17042	8.21945	13.2869	24.6637	7.89226	1.6341	0.0121195	0.0322062	CR43458	3R	31132330	31133050	+	721	lincRNA	-	-	29	19	29	2	8	13	1.90372	1.22825	2.06707	0.157285	0.597576	0.970607
FBgn0263441	15.9183	11.7673	20.44	2.17042	8.21945	4.08828	16.0419	4.82605	1.72338	0.0190595	0.0468614	CR43464	2L	2000058	2003935	+	2447	lincRNA	-	-	17	13	20	2	8	4	0.328818	0.247615	0.420037	0.0463436	0.176074	0.0879957
FBgn0264446	16.8547	19.0087	27.5939	2.17042	4.10973	5.11035	21.1524	3.79683	2.46808	0.00041539	0.0019098	CR43864	X	1902028	1903733	+	1659	lincRNA	-	-	18	21	27	2	4	5	0.513532	0.589985	0.83639	0.0683561	0.129853	0.16224
FBgn0264539	2.80911	8.1466	8.17598	0	0	1.02207	6.37723	0.34069	4.08977	0.0112699	0.0304362	CR43918	2R	13224175	13224462	-	288	lincRNA	-	-	3	9	8	0	0	1	0.493026	1.45652	1.42754	0	0	0.186914
FBgn0264727	1.87274	12.6725	4.08799	0	0	0	6.21107	0	5.01815	0.00494013	0.0153569	CR43995	3L	22072369	22072620	+	252	lincRNA	-	-	2	14	4	0	0	0	0.375639	2.58938	0.815738	0	0	0
FBgn0264775	168.547	172.889	184.982	28.2155	18.4938	25.5517	175.472	24.087	2.86714	3.53e-26	2.72e-24	CG44013	3R	15508896	15509917	-	940	protein_coding	-	-	180	191	181	26	18	25	9.06329	9.47051	9.8956	1.56834	1.0313	1.43169
FBgn0264788	14.0455	4.52589	14.308	1.08521	0	3.06621	10.9598	1.38381	2.97715	0.00924184	0.0257611	CR44018	3R	10639279	10645773	+	6412	lincRNA	-	-	15	5	14	1	0	3	0.110723	0.036345	0.112209	0.00884301	0	0.0251862
FBgn0264994	11.2364	25.345	28.6159	2.17042	2.05486	4.08828	21.7325	2.77119	2.96541	0.00018014	0.00092093	CR44145	2L	11736402	11737541	+	1071	lincRNA	-	-	12	28	28	2	2	4	0.530314	1.21853	1.34357	0.105885	0.100572	0.201051
FBgn0265634	12.1728	18.1036	21.462	4.34085	2.05486	6.13242	17.2461	4.17604	2.04411	0.00501306	0.015545	CR44441	4	194732	195900	+	1169	lincRNA	-	-	13	20	21	4	2	6	0.526344	0.797413	0.923201	0.194017	0.0921412	0.276294
FBgn0265851	14.9819	10.8621	25.5499	0	4.10973	5.11035	17.1313	3.07336	2.46143	0.00474296	0.0148628	CR44640	2R	20302195	20302995	+	801	lincRNA	-	-	16	12	25	0	4	5	0.945428	0.698259	1.60398	0	0.268947	0.336026
FBgn0266099	13.1092	13.5777	21.462	1.08521	4.10973	6.13242	16.0496	3.77578	2.07442	0.00771985	0.0222046	CG44836	3L	16390952	16400275	-	3078	protein_coding	-	-	14	15	21	1	4	6	0.215278	0.227138	0.350624	0.0184215	0.069989	0.104934
FBgn0266258	14.9819	11.7673	27.5939	5.42606	4.10973	8.17656	18.1144	5.90411	1.6107	0.0193532	0.047418	CR44953	3R	29755190	29759040	-	1087	lincRNA	-	-	16	13	27	5	4	8	0.696677	0.557419	1.27651	0.260816	0.198184	0.396183
FBgn0266279	32.7729	11.7673	22.484	4.34085	5.13716	4.08828	22.3414	4.52209	2.30295	0.00100973	0.00406997	CR44964	X	6746399	6748020	-	1556	lincRNA	-	-	35	13	22	4	5	4	1.06463	0.389405	0.726615	0.145762	0.173061	0.138384
FBgn0266406	24.3456	14.4828	27.5939	9.76691	6.16459	7.15449	22.1408	7.69533	1.52461	0.0102152	0.0280583	CR45046	3R	21878672	21884101	-	5273	lincRNA	-	Aldedh	26	16	27	9	6	7	0.233376	0.141426	0.263146	0.0967784	0.0612819	0.0714621
FBgn0266431	30.9002	30.776	36.7919	8.68169	8.21945	4.08828	32.8227	6.99647	2.23291	3.1e-05	0.00019921	CG45061	X	9871098	9871702	-	493	protein_coding	-	-	33	34	36	8	8	4	3.16817	3.2144	3.75273	0.920103	0.87394	0.436766
FBgn0266639	7.49096	3.62071	11.242	0	0	1.02207	7.45122	0.34069	4.31091	0.00595644	0.0179713	CR45146	2R	17697532	17698796	+	829	lincRNA	-	-	8	4	11	0	0	1	0.456748	0.224892	0.681914	0	0	0.0649353
FBgn0266680	43.073	36.2071	25.5499	5.42606	4.10973	4.08828	34.9434	4.54135	2.94938	7.98e-07	7.45e-06	CR45170	3L	2517161	2518402	+	811	lincRNA	-	-	46	40	25	5	4	4	2.68459	2.29883	1.5842	0.349577	0.26563	0.265506
FBgn0267089	22.4729	20.8191	21.462	1.08521	11.3017	4.08828	21.5846	5.49175	1.96602	0.00657182	0.019438	CR45533	X	7445387	7450119	+	4733	lincRNA	-	-	24	23	21	1	11	4	0.240003	0.226495	0.228021	0.01198	0.125168	0.0454945
FBgn0267762	20.6001	19.0087	32.7039	13.0225	6.16459	4.08828	24.1043	7.75847	1.64016	0.0083774	0.0237749	CR46093	3R	24318816	24319782	-	967	lincRNA	-	-	22	21	32	12	6	4	1.07681	1.01219	1.70065	0.703636	0.334167	0.222674
FBgn0039472	0.93637	0.905178	2.044	2436.3	2070.27	1601.58	1.29518	2036.05	-10.6465	1.21346e-46	2.40094e-44	CG17192	3R	27017180	27018287	-	1052	protein_coding	-	Lipase	1	1	2	2245	2015	1567	0.044991	0.0443049	0.0977025	121.002	103.157	80.1842
FBgn0051091	1.87274	0	1.022	447.107	282.544	441.534	0.964912	390.395	-8.67872	1.19612e-23	7.70849e-22	CG31091	3R	25899903	25902172	+	2149	protein_coding	-	-	2	0	1	412	275	432	0.0440489	0	0.0239142	10.8706	6.89184	10.8214
FBgn0020906	34.6457	41.6382	42.9239	10247.7	21671.6	16389.9	39.7359	16103.1	-8.66373	7.4867e-245	4.22175e-241	Jon25Bi	2L	4954279	4955144	-	866	protein_coding	-	Trypsin	37	46	42	9443	21093	16036	2.0222	2.47576	2.49243	618.281	1311.77	996.813
FBgn0031654	24.3456	51.5951	39.8579	4976.78	12342.5	8788.77	38.5996	8702.7	-7.8162	1.1897e-58	3.35436e-56	Jon25Bii	2L	4952243	4953136	-	894	protein_coding	-	Trypsin	26	57	39	4586	12013	8599	1.3765	2.9717	2.24191	290.864	723.69	517.781
FBgn0039471	0.93637	1.81036	10.22	605.548	1140.45	903.509	4.32223	883.169	-7.6994	4.03936e-20	1.83693e-18	CG6295	3R	27005899	27007055	-	1091	protein_coding	-	Lipase	1	2	10	558	1110	884	0.0433827	0.0854423	0.47105	29.0003	54.7945	43.6177
FBgn0034783	0	0	0	24.9599	35.9601	36.7945	0	32.5715	-7.53828	4.655e-09	6.48938e-08	CG9825	2R	22837361	22839291	+	1543	protein_coding	-	MFS_1	0	0	0	23	35	36	0	0	0	0.845192	1.22163	1.25595
FBgn0032067	0	0.905178	0	146.504	28.7681	14.309	0.301726	63.1935	-7.53027	9.66273e-08	1.07155e-06	CG9465	2L	8769159	8772344	-	2953	protein_coding	-	-	0	1	0	135	28	14	0	0.0157835	0	2.59217	0.510662	0.255211
FBgn0034428	0	0	0	20.619	13.3566	5.11035	0	13.0287	-6.21326	3.21778e-05	0.00020561	CG18606	2R	19287983	19288995	+	1013	protein_coding	-	-	0	0	0	19	13	5	0	0	0	1.0635	0.69115	0.265703
FBgn0034429	0	0	0	6.51127	19.5212	12.2648	0	12.7658	-6.18769	2.65029e-05	0.000173577	CG18607	2R	19289109	19289852	+	744	protein_coding	-	-	0	0	0	6	19	12	0	0	0	0.457269	1.37537	0.868248
FBgn0039768	6.55459	14.4828	13.286	884.448	747.97	521.255	11.4411	717.891	-5.97282	3.53274e-74	1.47564e-71	CG15533	3R	30428820	30431362	+	2203	protein_coding	-	Metallophos	7	16	13	815	728	510	0.150392	0.338511	0.303264	20.9767	17.7974	12.4621
FBgn0032069	86.146	76.9401	54.1659	5674.57	3432.65	3242	72.4173	4116.41	-5.82559	1.41577e-131	1.1405e-128	CG9468	2L	8777661	8781252	-	3160	protein_coding	-	-	92	85	53	5229	3341	3172	1.37798	1.25372	0.861946	93.8264	56.9414	54.0358
FBgn0036024	161.056	181.941	196.224	5371.8	8931.46	7645.08	179.74	7316.11	-5.34785	1.56543e-179	2.94248e-176	CG18180	3L	9641013	9641913	+	901	protein_coding	-	Trypsin	172	201	192	4950	8693	7480	9.03535	10.3977	10.9514	311.511	519.617	446.902
FBgn0020506	3.74548	0	3.06599	83.5613	90.414	74.6111	2.27049	82.8621	-5.21657	2.02213e-16	6.93178e-15	Amyrel	2R	16651095	16652699	-	1549	protein_coding	-	-	4	0	3	77	88	73	0.122222	0	0.0995317	2.8186	3.05964	2.53692
FBgn0002562	0	0	0	11.9373	7.19202	0	0	6.37645	-5.18246	0.0110278	0.0299113	Lsp1alpha	X	12490291	12492982	+	2625	protein_coding	-	-	0	0	0	11	7	0	0	0	0	0.237606	0.143617	0
FBgn0034819	0	0	0	0	8.21945	9.19862	0	5.80603	-5.05162	0.0142318	0.036729	CG9877	2R	23085881	23086268	-	388	protein_coding	-	-	0	0	0	0	8	9	0	0	0	0	1.11044	1.24867
FBgn0266702	1.87274	4.52589	5.10999	128.055	97.606	88.92	3.83621	104.86	-4.78043	1.77191e-20	8.3265e-19	CR45192	3R	5835478	5836178	-	649	lincRNA	-	-	2	5	5	118	95	87	0.145857	0.359082	0.395928	10.3093	7.88347	7.21622
FBgn0034426	0	0.905178	0	8.68169	3.0823	16.3531	0.301726	9.37237	-4.77888	0.00219286	0.00780899	CG10476	2R	19284551	19285219	-	669	protein_coding	-	-	0	1	0	8	3	16	0	0.0696694	0	0.678043	0.241509	1.28745
FBgn0032066	66.4823	53.4055	16.352	1873.08	738.723	554.984	45.4132	1055.59	-4.53722	1.60418e-09	2.41871e-08	CG9463	2L	8765273	8768710	-	3198	protein_coding	-	-	71	59	16	1726	719	543	1.0508	0.859887	0.257118	30.6024	12.1085	9.14022
FBgn0032068	88.0188	68.7935	49.0559	2707.6	954.484	983.231	68.6227	1548.44	-4.49519	1.33874e-15	4.19399e-14	CG9466	2L	8772946	8776263	-	3074	protein_coding	-	-	94	76	48	2495	929	962	1.44732	1.15233	0.80247	46.0214	16.2761	16.8464
FBgn0019928	21.5365	18.1036	18.396	449.278	442.823	381.232	19.3453	424.444	-4.45458	1.46536e-73	5.69875e-71	Ser8	2R	13434207	13435045	+	839	protein_coding	-	Trypsin	23	20	18	414	431	373	1.2975	1.11106	1.10256	27.979	27.6665	23.9322
FBgn0263493	0	0.905178	0	9.76691	7.19202	5.11035	0.301726	7.35642	-4.42726	0.00417486	0.0133876	CR43482	3L	9386112	9386463	+	352	pseudogene	-	-	0	1	0	9	7	5	0	0.132411	0	1.44975	1.07101	0.76465
FBgn0003358	220.047	344.873	336.237	6317.02	6002.26	5165.54	300.386	5828.27	-4.27855	9.42971e-141	9.66802e-138	Jon99Ci	3R	29925226	29926189	-	907	protein_coding	-	Trypsin	235	381	329	5821	5842	5054	12.2631	19.5788	18.6415	363.902	346.891	299.96
FBgn0034514	1.87274	0	0	29.3007	5.13716	2.04414	0.624246	12.1607	-4.26503	0.00595864	0.0179731	CG13427	2R	20538877	20539316	-	440	protein_coding	-	-	2	0	0	27	5	2	0.215139	0	0	3.4794	0.612006	0.244688
FBgn0030389	0	0.905178	2.044	21.7042	17.4663	15.331	0.983058	18.1672	-4.24376	5.02913e-05	0.000303633	CG15927	X	12454729	12455683	+	955	protein_coding	-	-	0	1	2	20	17	15	0	0.048805	0.107626	1.18746	0.958703	0.845519
FBgn0053306	37.4548	21.7243	30.6599	797.631	461.317	417.004	29.9463	558.651	-4.22319	6.25672e-44	1.12005e-41	CG33306	2L	13842888	13843742	-	800	protein_coding	-	-	40	24	30	735	449	408	2.36653	1.39826	1.92718	52.0944	30.227	27.454
FBgn0036023	0	10.8621	2.044	44.4937	101.716	82.7876	4.30204	76.3323	-4.12726	2.79497e-09	4.04643e-08	CG18179	3L	9639271	9640140	+	870	protein_coding	-	Trypsin	0	12	2	41	99	81	0	0.64288	0.118141	2.67213	6.12851	5.01189
FBgn0030537	0	1.81036	0	1.08521	10.2743	20.4414	0.603452	10.6003	-4.09138	0.00837749	0.0237749	CG12480	X	14169592	14171545	+	1954	protein_coding	-	-	0	2	0	1	10	20	0	0.047706	0	0.0290181	0.275622	0.550986
FBgn0001970	0.93637	0	1.022	19.5338	8.21945	4.08828	0.652789	10.6138	-4.04886	0.00332677	0.0111004	Pgant35A	2L	14359252	14361411	+	2160	protein_coding	-	Glycos_transf_2	1	0	1	18	8	4	0.0219123	0	0.0237924	0.472511	0.199469	0.0996877
FBgn0030098	158.246	328.58	213.598	3261.06	4193.98	3863.42	233.475	3772.82	-4.01323	1.62374e-73	6.10418e-71	CG12057	X	9191657	9192548	+	892	protein_coding	-	-	169	363	209	3005	4082	3780	8.96733	18.9675	12.0413	191.018	246.46	228.119
FBgn0028948	2.80911	0	2.044	28.2155	24.6584	23.5076	1.6177	25.4605	-3.99664	2.15326e-06	1.84546e-05	CG15253	2L	15615357	15616351	-	942	protein_coding	-	Astacin	3	0	2	26	24	23	0.150734	0	0.109112	1.56501	1.37214	1.31435
FBgn0033720	2.80911	1.81036	6.13199	40.1528	54.4539	60.3021	3.58382	51.6363	-3.87699	6.82192e-11	1.24093e-09	CG13160	2R	12371594	12375081	+	2736	protein_coding	-	-	3	2	6	37	53	59	0.0518975	0.0340708	0.112701	0.766795	1.04327	1.16084
FBgn0037204	0.93637	0	2.044	0	14.384	26.5738	0.993455	13.6526	-3.81246	0.00958266	0.0265667	CG11131	3L	22898744	22900262	+	1379	protein_coding	-	-	1	0	2	0	14	26	0.0343223	0	0.0745345	0	0.546767	1.01495
FBgn0034784	9.3637	10.8621	12.264	139.992	138.703	173.752	10.8299	150.816	-3.8039	1.16521e-28	1.07715e-26	CG9826	2R	22840739	22842977	+	2096	protein_coding	-	MFS_1	10	12	12	129	135	170	0.225813	0.266844	0.294226	3.48973	3.46881	4.36609
FBgn0051463	9.3637	9.05178	3.06599	98.7543	109.935	75.6331	7.16049	94.7742	-3.70775	4.07118e-17	1.47163e-15	CG31463	3R	8292335	8293609	+	1275	protein_coding	-	-	10	10	3	91	107	74	0.37122	0.365559	0.120921	4.04692	4.51973	3.12433
FBgn0052284	33.7093	16.2932	29.6379	472.067	286.653	262.672	26.5468	340.464	-3.68473	2.90857e-30	2.87744e-28	CG32284	3L	3186664	3187245	+	457	protein_coding	-	-	36	18	29	435	279	257	3.72844	1.8358	3.26117	53.9718	32.8796	30.2728
FBgn0000279	0	1.81036	1.022	23.8747	8.21945	4.08828	0.944118	12.0608	-3.66436	0.00352358	0.0116536	CecC	3R	30216484	30216938	+	386	protein_coding	-	-	0	2	1	22	8	4	0	0.241496	0.133139	3.23168	1.1162	0.557838
FBgn0035886	254.693	199.139	199.29	1351.09	3153.19	3715.22	217.707	2739.83	-3.6536	1.11306e-16	3.9106e-15	Jon66Ci	3L	8391540	8392377	+	838	protein_coding	-	Trypsin	272	220	195	1245	3069	3635	15.3626	12.2362	11.9586	84.2401	197.238	233.505
FBgn0043576	6.55459	8.1466	11.242	73.7944	86.3043	155.355	8.64772	105.151	-3.61238	2.7797e-15	8.40468e-14	PGRP-SC1a	2R	8709733	8710320	+	588	protein_coding	-	-	7	9	11	68	84	152	0.563458	0.7134	0.961406	6.5573	7.69379	13.9156
FBgn0051089	13.1092	9.05178	1.022	107.436	91.4414	88.92	7.72765	95.9325	-3.61161	1.73187e-14	4.7293e-13	CG31089	3R	25902643	25904178	+	1408	protein_coding	-	-	14	10	1	99	89	87	0.470616	0.331028	0.0364997	3.98682	3.40429	3.32623
FBgn0033327	0.93637	10.8621	7.15399	41.238	95.5511	85.8538	6.3175	74.2143	-3.55233	1.78316e-09	2.66717e-08	PGRP-SC1b	2R	8713446	8715094	+	1649	protein_coding	-	-	1	12	7	38	93	84	0.0287026	0.339179	0.218157	1.30664	3.03739	2.74217
FBgn0040393	0	0.905178	2.044	0	10.2743	23.5076	0.983058	11.2606	-3.54234	0.018961	0.0466589	CG14265	X	3236130	3236686	-	557	protein_coding	-	-	0	1	2	0	10	23	0	0.0836783	0.18453	0	0.966904	2.22284
FBgn0051267	14.0455	23.5346	28.6159	233.321	234.254	262.672	22.0654	243.416	-3.47054	1.45618e-37	2.00279e-35	CG31267	3R	17134197	17135283	+	921	protein_coding	-	Trypsin	15	26	28	215	228	257	0.770855	1.31577	1.56239	13.2365	13.3326	15.0213
FBgn0035887	14.9819	19.9139	12.264	92.243	142.813	282.091	15.7199	172.382	-3.45078	5.01572e-15	1.47695e-13	Jon66Cii	3L	8392820	8393649	-	830	protein_coding	-	Trypsin	16	22	12	85	139	276	0.912395	1.23541	0.74301	5.80677	9.01935	17.9006
FBgn0039475	50.564	37.1123	49.0559	486.175	639.063	346.482	45.5774	490.573	-3.43024	1.51323e-38	2.18797e-36	CG6277	3R	27022071	27023217	-	1085	protein_coding	-	Lipase	54	41	48	448	622	339	2.35562	1.76125	2.27354	23.4122	30.8745	16.8192
FBgn0034782	0	0.905178	1.022	4.34085	6.16459	9.19862	0.642392	6.56802	-3.36852	0.0179389	0.0446315	CG12490	2R	22834647	22836701	+	1647	protein_coding	-	MFS_1	0	1	1	4	6	9	0	0.0282992	0.0312031	0.137708	0.196199	0.29416
FBgn0031930	13.1092	21.7243	25.5499	322.308	128.429	141.046	20.1278	197.261	-3.29525	2.56196e-15	7.78807e-14	CG7025	2L	7691109	7692683	-	1350	protein_coding	-	-	14	24	25	297	125	138	0.490835	0.828601	0.951695	12.4743	4.98672	5.50276
FBgn0032303	9.3637	48.8796	18.396	244.173	244.529	238.142	25.5464	242.281	-3.23849	6.32338e-15	1.81463e-13	CG6508	2L	10819107	10820485	+	1379	protein_coding	-	Asp	10	54	18	225	238	233	0.343223	1.82515	0.67081	9.25149	9.29504	9.09551
FBgn0038941	2.80911	0	2.044	7.59648	18.4938	16.3531	1.6177	14.1478	-3.14732	0.00165851	0.0061752	CG7080	3R	22329300	22330546	+	1178	protein_coding	-	-	3	0	2	7	18	16	0.120536	0	0.0872522	0.336935	0.822936	0.731156
FBgn0035685	2.80911	0.905178	2.044	22.7894	9.24689	17.3752	1.91943	16.4705	-3.10654	0.000505538	0.0022491	CG13297	3L	6156592	6157377	-	595	protein_coding	-	-	3	1	2	21	9	17	0.238641	0.0783341	0.172745	2.00122	0.814637	1.53804
FBgn0028949	7.49096	7.24142	4.08799	67.2831	45.207	44.9711	6.27346	52.4871	-3.05286	1.14273e-09	1.75821e-08	CG15254	2L	15613905	15614828	-	868	protein_coding	-	Astacin	8	8	4	62	44	44	0.436226	0.429574	0.236827	4.0501	2.73006	2.72878
FBgn0039666	0.93637	0.905178	3.06599	20.619	11.3017	6.13242	1.63585	12.6844	-2.97808	0.00354157	0.0116994	Diedel	3R	29493852	29494267	+	416	protein_coding	-	-	1	1	3	19	11	6	0.113775	0.11204	0.370612	2.58973	1.42409	0.776414
FBgn0000357	3054.44	2481.09	2743.04	17753	22454.5	24737.1	2759.52	21648.2	-2.9718	1.77313e-96	1.11096e-93	Cp18	3L	8726791	8727613	+	649	protein_coding	-	-	3262	2741	2684	16359	21855	24203	237.892	196.849	212.534	1429.24	1813.61	2007.52
FBgn0002565	29.0275	46.1641	38.8359	413.466	359.601	116.516	38.0092	296.528	-2.96289	4.60164e-13	1.11367e-11	Lsp2	3L	12129393	12131869	+	2477	protein_coding	-	-	31	51	38	381	350	114	0.592348	0.959648	0.788404	8.72153	7.60993	2.4775
FBgn0004428	34.6457	183.751	79.7158	261.536	1031.54	983.231	99.3709	758.769	-2.93241	0.000518518	0.00229688	LysE	3L	1212827	1213406	+	580	protein_coding	-	-	37	203	78	241	1004	962	3.01936	16.3131	6.91127	23.5604	93.2276	89.2858
FBgn0265087	0.93637	2.71553	2.044	28.2155	11.3017	4.08828	1.89863	14.5352	-2.93104	0.00436016	0.0138518	CR44198	2L	13118872	13119288	-	417	lincRNA	-	-	1	3	2	26	11	4	0.113502	0.335315	0.246482	3.53534	1.42068	0.516368
FBgn0051041	82.4005	66.9832	73.5838	568.651	559.95	500.814	74.3225	543.138	-2.86985	1.53083e-64	4.93276e-62	CG31041	3R	29590070	29590906	-	700	protein_coding	-	-	88	74	72	524	545	490	5.95012	4.92722	5.28598	42.445	41.9312	37.682
FBgn0039769	25.282	49.7848	28.6159	360.29	202.404	189.083	34.5609	250.592	-2.85333	8.29355e-17	2.95062e-15	CG15534	3R	30432064	30435139	+	2164	protein_coding	-	Metallophos	27	55	28	332	197	185	0.590538	1.1846	0.664955	8.6991	4.90284	4.60203
FBgn0250836	195.701	189.182	163.52	2038.03	1083.94	834.009	182.801	1318.66	-2.85004	1.31531e-24	8.99036e-23	CG8628	3L	7130874	7131505	+	436	protein_coding	-	-	209	209	160	1878	1055	816	22.6882	22.3423	18.8593	244.232	130.318	100.749
FBgn0032211	6.55459	5.43107	9.19798	56.431	54.4539	39.8607	7.06121	50.2485	-2.84032	4.08735e-09	5.76935e-08	CG13138	2L	10299977	10302018	-	1958	protein_coding	-	-	7	6	9	52	53	39	0.16921	0.142826	0.236223	1.50586	1.45781	1.07223
FBgn0262609	0.93637	6.33625	0	32.5564	12.3292	8.17656	2.4242	17.6874	-2.83711	0.00632938	0.0188246	CG43135	X	4248377	4248657	+	218	protein_coding	-	-	1	7	0	30	12	8	0.217112	1.49661	0	7.80294	2.96458	1.97546
FBgn0050043	8.42733	12.6725	14.308	107.436	70.8928	73.589	11.8026	83.9726	-2.83382	1.12695e-12	2.54704e-11	CG30043	2R	12359436	12363165	+	3082	protein_coding	-	-	9	14	14	99	69	72	0.138214	0.211721	0.233446	1.82136	1.20574	1.25758
FBgn0033774	7362.68	6350.73	6556.12	45933.8	50501.4	46026.9	6756.51	47487.3	-2.81319	2.88086e-187	8.12258e-184	CG12374	2R	12762113	12763825	+	1464	protein_coding	-	-	7863	7016	6415	42327	49153	45033	254.207	223.366	225.189	1639.34	1808.2	1655.87
FBgn0039474	67.4186	34.3968	52.1219	268.047	448.988	343.415	51.3124	353.483	-2.78636	3.76482e-23	2.27057e-21	CG6283	3R	27020238	27021378	-	1083	protein_coding	-	Lipase	72	38	51	247	437	336	3.14663	1.6354	2.4201	12.9319	21.7316	16.7011
FBgn0030859	3.74548	4.52589	3.06599	22.7894	30.823	24.5297	3.77912	26.0474	-2.7787	1.33021e-05	9.47104e-05	CG12990	X	17669208	17671888	-	2330	protein_coding	-	-	4	5	3	21	30	24	0.0812541	0.100019	0.0661693	0.511042	0.693432	0.554486
FBgn0000355	5804.56	16962.1	4897.41	48011.9	68949.9	72652.8	9221.37	63204.9	-2.77697	1.09997e-05	8.04506e-05	Cp15	3L	8728481	8729066	+	515	protein_coding	-	-	6199	18739	4792	44242	67109	71084	569.712	1695.93	478.191	4871.03	7017.98	7430.19
FBgn0028532	47.7549	38.9226	65.4079	567.566	268.16	199.304	50.6951	345.01	-2.76896	7.91292e-14	2.04683e-12	CG7968	2L	13849400	13850329	+	867	protein_coding	-	-	51	43	64	523	261	195	2.78415	2.31162	3.79361	34.2039	16.2129	12.1074
FBgn0004426	14.0455	94.1385	55.1879	298.433	392.479	413.938	54.4573	368.283	-2.75714	8.9986e-05	0.000506165	LysC	3L	1210485	1210971	+	487	protein_coding	-	-	15	104	54	275	382	405	1.45782	9.95342	5.69844	32.0182	42.2448	44.7674
FBgn0004425	303.384	267.933	272.873	1240.4	2586.05	1793.73	281.397	1873.39	-2.73506	1.12454e-32	1.2557e-30	LysB	3L	1207371	1207981	+	611	protein_coding	-	-	324	296	267	1143	2517	1755	25.0983	22.5797	22.4575	106.071	221.861	154.622
FBgn0028920	895.169	1002.94	725.618	7764.69	5404.29	4230.35	874.575	5799.78	-2.72896	4.5705e-39	6.87282e-37	CG8997	2L	13843915	13845325	-	1347	protein_coding	-	-	956	1108	710	7155	5260	4139	33.5917	38.3389	27.0883	301.187	210.308	165.411
FBgn0032304	0.93637	2.71553	4.08799	26.0451	17.4663	7.15449	2.57996	16.8886	-2.72062	0.0020118	0.00725942	CG17134	2L	10820705	10821967	+	1263	protein_coding	-	Asp	1	3	4	24	17	7	0.0374747	0.11071	0.16276	1.07746	0.72491	0.298353
FBgn0002571	127.346	161.122	155.344	1053.74	1036.68	819.7	147.937	970.04	-2.71309	2.9667e-61	8.5791e-59	Mal-A3	2R	8455909	8457892	-	1795	protein_coding	-	-	136	178	152	971	1009	802	3.58604	4.62193	4.35182	30.6724	30.2737	24.0517
FBgn0028533	431.666	488.796	351.567	3394.54	2857.29	2063.56	424.01	2771.8	-2.70777	1.06404e-44	1.93551e-42	CG7953	2L	13847925	13849223	+	1154	protein_coding	-	-	461	540	344	3128	2781	2019	18.9076	21.81	15.3195	153.693	129.788	94.1816
FBgn0062412	96.4461	149.354	104.244	797.631	712.01	776.773	116.681	762.138	-2.70466	1.04209e-50	2.3985e-48	Ctr1B	3R	8317612	8319205	+	953	protein_coding	-	-	103	165	102	735	693	760	5.11547	8.06973	5.50046	43.7309	39.1633	42.9295
FBgn0035667	666.695	654.444	745.036	2517.69	5443.33	5275.92	688.725	4412.32	-2.67975	7.35346e-29	6.85391e-27	Jon65Ai	3L	6053493	6054443	-	951	protein_coding	-	Trypsin	712	723	729	2320	5298	5162	35.4357	35.4344	39.3948	138.325	300.034	292.195
FBgn0052379	7.49096	4.52589	8.17598	44.4937	44.1796	37.8166	6.73094	42.1633	-2.65539	9.56155e-08	1.06242e-06	CG32379	3L	7396355	7398208	+	1238	protein_coding	-	-	8	5	8	41	43	37	0.305851	0.188242	0.332094	1.87783	1.87062	1.60885
FBgn0035582	0.93637	1.81036	10.22	9.76691	17.4663	53.1476	4.32223	26.7936	-2.65516	0.00384836	0.0125294	CG13705	3L	4896864	4898470	+	1536	protein_coding	-	-	1	2	10	9	17	52	0.0308141	0.0606885	0.33458	0.332235	0.596069	1.82242
FBgn0011556	34.6457	46.1641	40.8799	182.316	277.407	301.51	40.5632	253.744	-2.64518	9.11108e-23	5.18963e-21	zetaTry	2R	11339186	11340132	-	947	protein_coding	-	Trypsin	37	51	40	168	270	295	1.84924	2.51008	2.17071	10.059	15.3551	16.769
FBgn0035412	1.87274	9.05178	0	18.4486	21.5761	28.6179	3.64151	22.8809	-2.62518	0.00199426	0.00721106	CG14957	3L	3187563	3188106	+	423	protein_coding	-	-	2	10	0	17	21	28	0.223785	1.10186	0	2.27878	2.67373	3.56331
FBgn0034456	1.87274	3.62071	0	14.1078	8.21945	11.2428	1.83115	11.19	-2.57864	0.00982752	0.0271388	Ir56b	2R	19508167	19509653	+	1436	protein_coding	-	-	2	4	0	13	8	11	0.0659199	0.12983	0	0.513313	0.300037	0.412357
FBgn0053300	6.55459	5.43107	2.044	6.51127	41.0973	34.7504	4.67655	27.453	-2.54564	0.0013551	0.00522845	Muc30E	2L	9897820	9903128	-	5253	protein_coding	-	-	7	6	2	6	40	34	0.0630713	0.0532368	0.0195665	0.0647646	0.410101	0.348423
FBgn0052642	182.592	422.718	244.257	1403.18	1708.62	1793.73	283.189	1635.18	-2.5287	1.94458e-23	1.21839e-21	CG32642	X	12959220	12960790	+	1413	protein_coding	-	-	195	467	239	1293	1663	1755	6.53181	15.4043	8.69255	51.886	63.3853	66.8606
FBgn0028534	665.759	830.048	516.109	4719.59	3512.79	3114.25	670.639	3782.21	-2.49488	2.00006e-36	2.62286e-34	CG7916	2L	13846752	13847799	+	923	protein_coding	-	-	711	917	505	4349	3419	3047	36.4594	46.3058	28.1178	267.166	199.497	177.708
FBgn0267009	2.80911	2.71553	4.08799	21.7042	14.384	17.3752	3.20421	17.8212	-2.48261	0.000671477	0.00288053	CR45453	2L	10870867	10871133	+	267	lincRNA	-	-	3	3	4	20	14	17	0.531803	0.523694	0.76991	4.24729	2.82394	3.42747
FBgn0038719	48.6912	31.6812	53.1439	235.491	246.584	247.341	44.5054	243.138	-2.45565	5.81939e-26	4.37541e-24	CG16727	3R	19613381	19615784	+	2014	protein_coding	-	Sugar_tr	52	35	52	217	240	242	1.22204	0.809984	1.32689	6.10933	6.41786	6.46832
FBgn0039476	0.93637	1.81036	4.08799	6.51127	17.4663	12.2648	2.27824	12.0808	-2.42855	0.00956844	0.0265403	CG6271	3R	27024968	27026109	-	1072	protein_coding	-	Lipase	1	2	4	6	17	12	0.0441516	0.0869567	0.191759	0.317358	0.854069	0.60259
FBgn0015001	34.6457	23.5346	30.6599	184.486	136.648	156.377	29.6134	159.17	-2.42788	1.49242e-18	6.37558e-17	iotaTry	2R	11356720	11357537	+	818	protein_coding	-	Trypsin	37	26	30	170	133	153	2.14087	1.48145	1.88477	11.7839	8.75663	10.0687
FBgn0038967	2.80911	2.71553	6.13199	21.7042	18.4938	21.4635	3.88554	20.5538	-2.41971	0.0003857	0.00179581	CG13847	3R	22425214	22436150	-	3083	protein_coding	-	-	3	3	6	20	18	21	0.0460563	0.045354	0.100016	0.367832	0.31444	0.366675
FBgn0002563	222.856	289.657	307.621	1470.46	1976.78	921.907	273.378	1456.38	-2.41374	1.62834e-22	9.00214e-21	Lsp1beta	2L	898500	901316	+	2749	protein_coding	-	-	238	320	301	1355	1924	902	4.09773	5.42554	5.62708	27.9485	37.6937	17.6631
FBgn0085345	1.87274	2.71553	2.044	6.51127	14.384	14.309	2.21076	11.7348	-2.40689	0.00769003	0.0221569	CG34316	3R	15230585	15231686	+	907	protein_coding	-	-	2	3	2	6	14	14	0.104367	0.154164	0.113322	0.375092	0.831303	0.830914
FBgn0053012	18.7274	8.1466	29.6379	98.7543	103.771	91.9862	18.8373	98.1704	-2.39436	1.97324e-09	2.92819e-08	CG33012	2R	12367353	12370886	+	2849	protein_coding	-	-	20	9	29	91	101	90	0.33226	0.147237	0.523115	1.8111	1.90927	1.70053
FBgn0264382	5.61822	8.1466	5.10999	59.6866	22.6035	16.3531	6.2916	32.8811	-2.37793	0.000364479	0.00170706	CR43834	X	8484194	8484580	+	243	lincRNA	-	-	6	9	5	55	22	16	1.16865	1.72625	1.05744	12.8336	4.8759	3.54445
FBgn0033362	3.74548	0.905178	8.17598	28.2155	11.3017	25.5517	4.27555	21.6897	-2.36383	0.00254124	0.00882935	CG8172	2R	9007234	9013526	-	3146	protein_coding	-	Trypsin	4	1	8	26	11	25	0.0601786	0.0148153	0.130684	0.468606	0.18831	0.427776
FBgn0030340	21.5365	4.52589	8.17598	30.3859	47.2619	93.0083	11.4128	56.8854	-2.31782	0.000161671	0.000841564	CG15740	X	11842662	11846099	-	3265	protein_coding	-	-	23	5	8	28	46	91	0.333416	0.0713764	0.125921	0.48626	0.758775	1.50035
FBgn0001285	427.921	391.942	486.471	1569.22	2281.93	2504.07	435.445	2118.4	-2.28316	3.24577e-36	4.15975e-34	Jon44E	2R	8691448	8692844	+	1397	protein_coding	-	Trypsin	457	433	476	1446	2221	2450	15.4832	14.4464	17.5106	58.6902	85.6231	94.4072
FBgn0085415	2.80911	6.33625	5.10999	27.1303	13.3566	28.6179	4.75178	23.0349	-2.2754	0.000690397	0.00294824	CG34386	2R	18062415	18093628	+	2180	protein_coding	-	-	3	7	5	25	13	28	0.0651337	0.149661	0.11787	0.650245	0.321163	0.691412
FBgn0033292	24.3456	23.5346	24.5279	120.459	116.1	111.406	24.1361	115.988	-2.26507	7.26287e-16	2.35375e-14	Cyp4ad1	2R	8439395	8442806	-	1903	protein_coding	-	p450	26	26	24	111	113	109	0.64666	0.636799	0.648133	3.30733	3.198	3.08335
FBgn0051661	141.392	174.699	205.422	846.465	746.943	860.582	173.838	817.997	-2.23627	9.21153e-43	1.55056e-40	CG31661	2L	1497243	1498583	+	1341	protein_coding	-	Asp	151	193	201	780	727	842	5.32953	6.70805	7.70298	32.9807	29.1974	33.8002
FBgn0037181	5.61822	3.62071	1.022	5.42606	15.4115	26.5738	3.42031	15.8038	-2.19833	0.0135763	0.0353041	CG11370	3L	22712155	22713660	+	1323	protein_coding	-	-	6	4	1	5	15	26	0.214651	0.140919	0.0388447	0.214291	0.610619	1.05791
FBgn0051148	174.165	174.699	142.058	1085.21	683.242	437.446	163.641	735.3	-2.16679	1.56758e-14	4.30151e-13	CG31148	3R	23700621	23702605	+	1777	protein_coding	-	Glyco_hydro_30	186	193	139	1000	665	428	4.95412	5.06218	4.01993	31.9085	20.1545	12.9656
FBgn0038943	6.55459	1.81036	5.10999	23.8747	14.384	21.4635	4.49164	19.9074	-2.15472	0.001954	0.00708822	CG5391	3R	22333088	22334150	-	782	protein_coding	-	-	7	2	5	22	14	21	0.423675	0.119204	0.32859	1.59518	0.964184	1.4456
FBgn0003357	7362.68	7169.91	7718.13	21528.4	40782.9	35789.8	7416.91	32700.4	-2.14044	1.77217e-27	1.50275e-25	Jon99Ciii	3R	29922216	29923455	+	1240	protein_coding	-	Trypsin	7863	7921	7552	19838	39694	35017	300.129	297.732	312.991	907.13	1724.02	1520.17
FBgn0033294	298.702	276.079	132.86	1279.46	1049.01	751.221	235.88	1026.56	-2.12006	3.32824e-14	8.87374e-13	Mal-A4	2R	8458815	8460884	+	1786	protein_coding	-	-	319	305	130	1179	1021	735	8.45377	7.95951	3.7407	37.4305	30.7881	22.1534
FBgn0051928	182.592	306.855	249.367	1138.39	958.594	1089.53	246.272	1062.17	-2.10812	8.97814e-30	8.80482e-28	CG31928	2L	1492295	1493859	+	1565	protein_coding	-	Asp	195	339	244	1049	933	1066	5.89741	10.0961	8.01248	38.0062	32.1075	36.6672
FBgn0086027	2.80911	9.95696	8.17598	58.6014	15.4115	16.3531	6.98068	30.122	-2.1068	0.00408196	0.0131382	snoRNA:Or-CD1	2R	22197269	22197374	-	106	snoRNA	-	-	3	11	8	54	15	16	1.33954	4.83676	3.87861	28.8856	7.62121	8.12549
FBgn0000356	1858.69	2141.65	1388.9	6424.45	7500.25	9251.77	1796.41	7725.49	-2.10425	1.76293e-31	1.77521e-29	Cp16	3L	8731944	8732599	+	522	protein_coding	-	-	1985	2366	1359	5920	7300	9052	179.983	211.257	133.795	643.05	753.166	933.49
FBgn0034052	68.355	116.768	164.542	555.628	483.92	417.004	116.555	485.518	-2.0609	3.50847e-14	9.3322e-13	CG8299	2R	15940610	15941483	-	874	protein_coding	-	Trypsin	73	129	161	512	471	408	3.95323	6.87933	9.46686	33.2164	29.0234	25.1295
FBgn0265316	19.6638	26.2502	35.7699	111.777	115.072	109.361	27.2279	112.07	-2.0475	8.73716e-12	1.80803e-10	CR44289	3R	27535831	27537903	-	2073	lincRNA	-	-	21	29	35	103	112	107	0.47947	0.652029	0.867681	2.81729	2.90976	2.77856
FBgn0043575	92.7006	80.5608	82.7818	370.057	380.15	289.246	85.3478	346.484	-2.02094	1.68234e-25	1.23204e-23	PGRP-SC2	2R	8716950	8717695	+	746	protein_coding	-	-	99	89	81	341	370	283	6.28113	5.56057	5.58004	25.9185	26.7117	20.4213
FBgn0039470	82.4005	66.078	98.1118	479.664	301.037	216.679	82.1968	332.46	-2.0173	1.33372e-11	2.68602e-10	CG6296	3R	27003236	27005469	-	2127	protein_coding	-	Lipase	88	73	96	442	293	212	1.9582	1.59964	2.3195	11.7828	7.41889	5.36542
FBgn0052644	129.219	101.38	125.706	489.43	413.028	535.564	118.768	479.341	-2.01436	3.41321e-29	3.26222e-27	Mur11Da	X	12967888	12970056	+	2012	protein_coding	-	-	138	112	123	451	402	524	3.24633	2.59453	3.14173	12.7099	10.7606	14.0197
FBgn0003356	9423.63	9692.64	9678.32	20392.2	51997.3	43533	9598.2	38640.8	-2.0093	1.23706e-08	1.62002e-07	Jon99Cii	3R	29923754	29924615	-	862	protein_coding	-	Trypsin	10064	10708	9470	18791	50609	42593	552.592	578.987	564.591	1236.05	3161.98	2659.91
FBgn0034301	6.55459	4.52589	34.7479	49.9197	47.2619	84.8318	15.2761	60.6711	-2.00271	0.00211701	0.00757718	CG5756	2R	18101061	18108389	-	4100	protein_coding	-	CBM_14	7	5	34	46	46	83	0.0808082	0.05684	0.426174	0.636162	0.604244	1.08976
FBgn0065048	12.1728	6.33625	10.22	70.5388	26.7132	17.3752	9.57634	38.2091	-1.99633	0.0015939	0.00598205	snoRNA:U3:54Aa	2R	17143521	17143693	-	173	snoRNA	-	-	13	7	10	65	26	17	3.55663	1.88591	2.97061	21.304	8.09405	5.28979
FBgn0262352	4.68185	9.05178	1.022	23.8747	17.4663	14.309	4.91854	18.55	-1.89474	0.0113383	0.0305553	CG43050	2L	13119294	13120767	+	1119	protein_coding	-	-	5	10	1	22	17	14	0.211486	0.416522	0.0459263	1.11477	0.818196	0.673493
FBgn0038481	123.601	118.578	123.662	371.142	482.893	502.858	121.947	452.298	-1.89191	3.58597e-26	2.7512e-24	CG17475	3R	17129339	17130426	-	1088	protein_coding	-	Trypsin	132	131	121	342	470	492	5.7423	5.6119	5.71542	17.8234	23.2652	24.3429
FBgn0039778	2034.73	2289.19	2602.01	6139.04	10174.7	9335.58	2308.64	8549.76	-1.88897	5.6711e-25	3.99742e-23	Jon99Fi	3R	30488963	30489895	+	933	protein_coding	-	Trypsin	2173	2529	2546	5657	9903	9134	110.235	126.338	140.239	343.794	571.642	527.005
FBgn0035006	41.2003	42.5434	33.7259	137.822	132.539	165.575	39.1565	145.312	-1.88895	1.0034e-13	2.56606e-12	CG4563	2R	24451084	24453040	-	1766	protein_coding	-	AMP-binding	44	47	33	127	129	162	1.17924	1.24044	0.960317	4.07762	3.93403	4.9381
FBgn0041252	372.675	517.762	622.397	2287.63	1509.3	1786.58	504.278	1861.17	-1.88438	6.73876e-20	3.0522e-18	Femcoat	X	4241887	4242826	-	833	protein_coding	-	-	398	572	609	2108	1469	1748	22.6141	32.0051	37.5719	143.489	94.9763	112.962
FBgn0032082	39.3275	20.8191	34.7479	142.163	93.4963	112.428	31.6315	116.029	-1.87759	8.08176e-09	1.08117e-07	CG18088	2L	8967535	8970627	+	2628	protein_coding	-	DUF229	42	23	34	131	91	110	0.756424	0.407916	0.664883	2.82644	1.8649	2.25322
FBgn0051266	39.3275	38.9226	64.3859	144.333	189.047	187.039	47.5453	173.473	-1.87389	6.91953e-12	1.44784e-10	CG31266	3R	17132662	17133719	+	993	protein_coding	-	Trypsin	42	43	63	133	184	183	2.00189	2.01831	3.26049	7.59444	9.97946	9.92058
FBgn0052602	470.058	668.926	421.063	1218.69	2157.61	2326.23	520.016	1900.84	-1.86961	1.65994e-14	4.54389e-13	Muc12Ea	X	14277735	14288161	+	10025	protein_coding	-	-	502	739	412	1123	2100	2276	2.37007	3.4358	2.11205	6.35168	11.2817	12.2215
FBgn0032945	644.222	685.22	931.04	3902.42	2929.21	1272.48	753.494	2701.37	-1.84208	0.000123185	0.000665363	CG8665	2L	21371227	21377995	+	3624	protein_coding	-	Aldedh	688	757	911	3596	2851	1245	8.98548	9.73589	12.9188	56.2633	42.3689	18.4934
FBgn0028855	19.6638	17.1984	13.286	85.7317	52.399	41.9048	16.716	60.0119	-1.83868	1.66642e-05	0.000115513	CG15282	2L	14712471	14713298	+	701	protein_coding	-	-	21	19	13	79	51	41	1.41789	1.26329	0.953052	6.39003	3.91824	3.14848
FBgn0051926	142.328	229.915	306.599	931.112	641.117	848.318	226.281	806.849	-1.8354	3.64651e-13	8.92091e-12	CG31926	2L	1495460	1497071	+	1612	protein_coding	-	Asp	152	254	300	858	624	830	4.46293	7.34407	9.56418	30.1798	20.8477	27.7171
FBgn0030746	6.55459	19.9139	11.242	56.431	28.7681	48.0373	12.5702	44.4121	-1.81516	0.000441349	0.00201091	CG9981	X	16399782	16405122	-	4100	protein_coding	-	E1-E2_ATPase	7	22	11	52	28	47	0.0808082	0.250096	0.13788	0.719139	0.367801	0.617091
FBgn0044046	50.564	60.6469	34.7479	173.634	196.239	144.112	48.6529	171.328	-1.81072	1.58674e-11	3.17291e-10	Ilp7	X	3667621	3668845	+	1044	protein_coding	-	-	54	67	34	160	191	141	2.44813	2.99118	1.67367	8.68987	9.85307	7.27033
FBgn0031653	5400.98	4991.15	4473.28	9922.09	21145.6	19152.6	4955.14	16740.1	-1.75631	1.43741e-14	3.9733e-13	Jon25Biii	2L	4949941	4950767	-	827	protein_coding	-	Trypsin	5768	5514	4377	9143	20581	18739	330.112	310.763	271.996	626.869	1340.29	1219.77
FBgn0032789	956.97	1452.81	1574.9	5334.9	3629.92	4453.16	1328.23	4472.66	-1.75175	8.07613e-19	3.48975e-17	CG13083	2L	19487490	19488691	+	1145	protein_coding	-	-	1022	1605	1541	4916	3533	4357	42.2461	65.3337	69.1654	243.444	166.179	204.841
FBgn0046875	9.3637	5.43107	3.06599	11.9373	14.384	33.7283	5.95359	20.0166	-1.74428	0.015678	0.0398955	Obp83g	3R	6111671	6112302	-	569	protein_coding	-	-	10	6	3	11	14	33	0.831819	0.491481	0.270957	1.09616	1.32512	3.12203
FBgn0032726	494.403	511.425	618.309	1807.96	2056.92	1519.82	541.379	1794.9	-1.72989	1.93768e-30	1.9339e-28	CG10621	2L	18952206	18954431	-	1519	protein_coding	-	-	528	565	605	1666	2002	1487	16.4519	17.3364	20.4686	62.1886	70.9815	52.6973
FBgn0033826	296.829	284.226	240.17	1038.55	951.402	719.537	273.742	903.162	-1.72101	1.99473e-23	1.2429e-21	CG4734	2R	13297202	13298467	-	1011	protein_coding	-	-	317	314	235	957	926	704	14.8405	14.4759	11.9456	53.6728	49.3286	37.4849
FBgn0038642	11.2364	4.52589	14.308	24.9599	21.5761	51.1035	10.0234	32.5465	-1.70918	0.00419572	0.0134239	Muc91C	3R	18687556	18692719	-	3111	protein_coding	-	-	12	5	14	23	21	50	0.182567	0.0749097	0.23127	0.4192	0.363545	0.865178
FBgn0262531	3.74548	6.33625	8.17598	29.3007	21.5761	8.17656	6.0859	19.6844	-1.69631	0.0170572	0.0428334	CG43085	3L	17645486	17646737	-	1193	protein_coding	-	-	4	7	8	27	21	8	0.158694	0.27348	0.34462	1.28327	0.94802	0.360981
FBgn0038011	90.8279	96.854	152.278	476.408	275.352	345.459	113.32	365.74	-1.6926	2.06437e-10	3.52319e-09	CG4066	3R	12311353	12313119	+	1767	protein_coding	-	-	97	107	149	439	268	338	2.59822	2.82238	4.33352	14.0871	8.1684	10.2971
FBgn0030438	461.63	623.668	367.919	1871.99	1250.38	1575.01	484.406	1565.79	-1.69158	4.91314e-16	1.62019e-14	CG15721	X	12970711	12973967	+	2804	protein_coding	-	-	493	689	360	1725	1217	1541	8.32166	11.4527	6.59806	34.8823	23.375	29.5842
FBgn0028945	51.5003	38.0175	30.6599	225.724	94.5237	68.4786	40.0592	129.575	-1.69082	0.000123071	0.000665066	CG7631	2L	15628678	15629552	+	813	protein_coding	-	Astacin	55	42	30	208	92	67	3.20194	2.40783	1.89637	14.5066	6.09447	4.43629
FBgn0261675	346.457	263.407	246.301	1226.29	864.07	668.433	285.388	919.598	-1.68737	1.38671e-13	3.50658e-12	Npc1b	X	20934869	20939503	+	3971	protein_coding	-	-	370	291	241	1130	841	654	4.41004	3.41555	3.11895	16.1351	11.406	8.8657
FBgn0031533	67.4186	85.0867	60.2979	262.621	239.392	175.796	70.9344	225.936	-1.66801	5.51943e-12	1.16135e-10	CG2772	2L	3445992	3447589	+	1338	protein_coding	-	-	72	94	59	242	233	172	2.54693	3.27446	2.26614	10.2554	9.37861	6.92003
FBgn0000358	4862.57	6586.07	6095.2	13357.9	19256.1	22936.3	5847.95	18516.8	-1.66285	2.66653e-18	1.09357e-16	Cp19	3L	8729865	8730604	+	651	protein_coding	-	-	5193	7276	5964	12309	18742	22441	377.553	520.93	470.813	1072.1	1550.51	1855.65
FBgn0037429	26.2184	19.9139	30.6599	73.7944	79.1122	88.92	25.5974	80.6089	-1.66069	1.98583e-07	2.09899e-06	Osi19	3R	6335362	6337196	+	1138	protein_coding	-	-	28	22	30	68	77	87	1.16455	0.901049	1.35479	3.38813	3.64407	4.1154
FBgn0265457	9.3637	4.52589	7.15399	28.2155	26.7132	10.2207	7.01452	21.7165	-1.63123	0.0130399	0.0341612	CR44357	X	7166451	7405797	-	2789	lincRNA	-	-	10	5	7	26	26	10	0.169704	0.0835583	0.128986	0.528589	0.502069	0.193013
FBgn0031900	2.80911	9.05178	8.17598	18.4486	23.6309	19.4193	6.67896	20.4996	-1.62004	0.00989255	0.0272983	CG13786	2L	7250607	7252982	-	2185	protein_coding	-	-	3	10	8	17	23	19	0.0649847	0.213313	0.188161	0.441155	0.566911	0.468099
FBgn0051636	14.9819	8.1466	17.374	64.0275	29.7955	29.64	13.5008	41.1543	-1.61178	0.00192656	0.00700445	CG31636	2L	6656459	6658152	-	1567	protein_coding	-	-	16	9	17	59	29	29	0.483273	0.267696	0.557534	2.1349	0.996707	0.996241
FBgn0035547	40.2639	19.0087	35.7699	95.4986	64.7282	127.759	31.6809	95.9952	-1.60257	2.88541e-05	0.000186806	CG15022	3L	4459193	4460317	-	1063	protein_coding	-	-	43	21	35	88	63	125	1.91459	0.920776	1.6921	4.694	3.19188	6.33012
FBgn0065076	6.55459	8.1466	7.15399	31.4711	14.384	20.4414	7.28506	22.0989	-1.59732	0.00784633	0.0224881	snoRNA:185	2R	19727098	19727152	-	55	snoRNA	-	-	7	9	7	29	14	20	6.02388	7.62689	6.54074	29.8971	13.7089	19.575
FBgn0027527	362.375	350.304	496.691	1204.59	1117.85	1287.81	403.123	1203.41	-1.57937	1.49867e-23	9.49551e-22	Osi6	3R	6234708	6237181	+	1846	protein_coding	-	-	387	387	486	1110	1088	1260	9.92248	9.77118	13.5299	34.0945	31.7421	36.743
FBgn0036996	1314.66	1023.76	890.16	3010.38	3313.47	3270.62	1076.19	3198.16	-1.57097	4.53198e-26	3.45349e-24	mag	3L	20460683	20462274	+	1477	protein_coding	-	-	1404	1131	871	2774	3225	3200	44.9912	35.6903	30.306	106.493	117.595	116.629
FBgn0030595	40.2639	36.2071	37.8139	97.6691	138.703	102.207	38.095	112.86	-1.56768	2.1689e-08	2.73918e-07	CG14406	X	14909873	14910845	-	667	protein_coding	-	-	43	40	37	90	135	100	3.05129	2.79513	2.8508	7.65086	10.9005	8.07067
FBgn0033275	91.7642	56.121	67.4519	233.321	221.925	180.906	71.779	212.051	-1.56265	1.04035e-10	1.84773e-09	CG14756	2R	8204888	8205706	-	819	protein_coding	-	-	98	62	66	215	216	177	5.66348	3.52838	4.14144	14.885	14.2039	11.6339
FBgn0002869	29.9638	9.05178	13.286	103.095	27.7407	22.4855	17.4339	51.1071	-1.54926	0.0191137	0.0469513	MtnB	3R	20503102	20503746	-	584	protein_coding	-	-	32	10	13	95	27	22	2.59345	0.798096	1.14399	9.22368	2.48994	2.02789
FBgn0034022	14.9819	5.43107	32.7039	35.812	36.9875	79.7214	17.7056	50.8403	-1.53177	0.0110131	0.029886	CG12964	2R	15485953	15497231	-	3942	protein_coding	-	-	16	6	32	33	36	78	0.192108	0.0709419	0.417181	0.474669	0.491841	1.06516
FBgn0030148	295.893	425.434	386.315	926.771	1071.61	1195.82	369.214	1064.73	-1.5281	8.85454e-20	3.97855e-18	CG3106	X	9659095	9662903	-	2589	protein_coding	-	-	316	470	378	854	1043	1170	5.77692	8.46123	7.50328	18.7033	21.6966	24.327
FBgn0052774	293.084	518.667	327.039	972.35	1139.42	1174.36	379.597	1095.38	-1.52806	1.92934e-13	4.80334e-12	Muc4B	X	4244095	4246139	-	1987	protein_coding	-	-	313	573	320	896	1109	1149	7.45569	13.4408	8.27644	25.5684	30.0588	31.1285
FBgn0265315	5.61822	3.62071	12.264	15.193	18.4938	27.5959	7.16763	20.4275	-1.52696	0.0201996	0.0492138	CR44288	3R	27538233	27539159	+	927	lincRNA	-	-	6	4	12	14	18	27	0.306346	0.201117	0.665262	0.856331	1.04576	1.5679
FBgn0032311	55.2458	47.9744	47.0119	118.288	166.444	145.134	50.0774	143.289	-1.51684	1.52899e-09	2.31152e-08	CG12517	2L	10870167	10870722	+	556	protein_coding	-	-	59	53	46	109	162	142	5.02248	4.44292	4.25182	11.1159	15.692	13.7483
FBgn0031929	61.8004	90.5178	83.8038	348.353	172.609	153.31	78.7073	224.757	-1.5129	4.646e-06	3.72937e-05	CG18585	2L	7689311	7691061	-	1423	protein_coding	-	-	66	100	82	321	168	150	2.19523	3.27539	2.96142	12.7907	6.35833	5.67442
