# Supplementary material for: Auxin exposure disrupts feeding behavior and fatty acid metabolism in adult Drosophila
Source: eLife. 2024 Jan 19;12:RP91953. doi: 10.7554/eLife.91953 (PMC10945601; doi:10.7554/eLife.91953)
Supplement: Figure 3—source data 3. [file elife-91953-fig3-data3.xlsx]

## Sheet: Sheet1
gene_id	VK_10_m_1	VK_10_m_2	VK_10_m_3	VK_0_m_1	VK_0_m_2	VK_0_m_3	VK_m_10	VK_m	log2FoldChange	pvalue	padj	gene_name	gene_chr	gene_start	gene_end	gene_strand	gene_length	gene_biotype	gene_description	tf_family	VK_10_m_1_count	VK_10_m_2_count	VK_10_m_3_count	VK_0_m_1_count	VK_0_m_2_count	VK_0_m_3_count	VK_10_m_1_fpkm	VK_10_m_2_fpkm	VK_10_m_3_fpkm	VK_0_m_1_fpkm	VK_0_m_2_fpkm	VK_0_m_3_fpkm
FBgn0036597	46.7211	23.9396	22.5131	9.98028	18.2804	4.71143	31.058	10.9907	1.50134	0.00383944	0.0189051	CG4962	3L	16294711	16295547	-	774	protein_coding	-	-	46	24	21	10	19	5	3.5374	1.82626	1.70222	0.7886	1.45971	0.384018
FBgn0004034	128.991	148.625	93.2687	49.9014	48.1063	31.0954	123.628	43.0344	1.52631	4.80374e-09	6.8003e-08	y	X	356509	361245	+	2038	protein_coding	-	-	127	149	87	50	50	33	3.70908	4.30602	2.67826	1.49749	1.45889	0.962571
FBgn0037615	144.226	101.743	92.1966	51.8975	35.5987	30.1531	112.722	39.2164	1.52722	2.51715e-08	3.31009e-07	CG11760	3R	8719198	8721320	+	1908	protein_coding	-	-	142	102	86	52	37	32	4.42973	3.14858	2.82786	1.6635	1.15313	0.996999
FBgn0265186	729.256	796.99	653.953	306.395	232.835	217.668	726.733	252.299	1.52825	1.89052e-32	1.166e-30	CG44251	2R	12948348	12952293	-	1917	protein_coding	-	-	718	799	610	307	242	231	22.2931	24.5481	19.9639	9.77493	7.50669	7.1633
FBgn0041184	1259.44	1088.26	1471.93	466.079	452.199	405.183	1273.21	441.154	1.529	2.83479e-44	2.58615e-42	Socs36E	2L	18138675	18152417	-	3503	protein_coding	-	SH2	1240	1091	1373	467	470	430	21.0692	18.3433	24.5906	8.13719	7.97835	7.29712
FBgn0050345	1688.05	1556.08	1580.21	610.793	538.791	498.469	1608.11	549.351	1.55041	2.29009e-68	4.29784e-66	CG30345	2R	9148689	9151892	+	2217	protein_coding	-	MFS_1	1662	1560	1474	612	560	529	44.6203	41.4431	41.7128	16.8494	15.0203	14.1845
FBgn0042101	337.205	267.326	325.904	125.752	87.5535	103.651	310.145	105.652	1.55453	3.43059e-20	1.14676e-18	CG18744	3R	7797078	7798771	-	1336	protein_coding	-	-	332	268	304	126	91	110	14.791	11.8147	14.276	5.75654	4.05033	4.89451
FBgn0265852	43.6741	58.8516	51.4586	20.9586	17.3183	14.1343	51.3281	17.4704	1.5578	1.8961e-05	0.000162698	CR44641	2R	20303195	20303595	+	401	lincRNA	-	-	43	59	48	21	18	15	6.38251	8.66565	7.50991	3.19648	2.66921	2.22367
FBgn0261856	131.022	144.635	190.826	60.8797	49.0684	48.0566	155.494	52.6682	1.56202	5.46132e-12	1.06289e-10	CR42785	2R	7000154	7001696	+	450	pseudogene	-	-	129	145	178	61	51	51	17.0626	18.9779	24.8168	8.27399	6.73927	6.73722
FBgn0000055	277.28	281.291	320.544	89.8225	91.402	114.959	293.038	98.7278	1.56755	1.21189e-21	4.45608e-20	Adh	2L	14615552	14618902	+	2254	protein_coding	-	adh_short	273	282	299	90	95	122	7.20902	7.36866	8.32253	2.43717	2.50625	3.21758
FBgn0038530	45.7054	24.9371	16.0808	17.9645	7.69701	3.76914	28.9078	9.81022	1.56888	0.00550343	0.0256287	AttD	3R	17625268	17626086	+	742	protein_coding	-	-	45	25	15	18	8	4	3.60974	1.9844	1.26831	1.4807	0.641123	0.320464
FBgn0051901	1566.17	1483.26	1787.11	631.752	510.889	481.508	1612.18	541.383	1.57485	3.61955e-52	4.44393e-50	Mur29B	2L	8352187	8355172	+	1884	protein_coding	-	-	1542	1487	1667	633	531	511	48.7159	46.4861	55.5128	20.5079	16.7598	16.1236
FBgn0265346	24.3762	44.8868	26.8013	16.9665	7.69701	7.53829	32.0215	10.7339	1.58448	0.0012517	0.00717749	CR44300	2R	10785714	10786026	-	313	lincRNA	-	-	24	45	25	17	8	8	4.56388	8.46763	5.01111	3.31514	1.51985	1.51939
FBgn0036411	57.8936	54.8616	67.5394	24.9507	18.2804	16.9611	60.0982	20.0641	1.58457	2.77058e-06	2.72434e-05	Sox21a	3L	14103481	14108118	-	2335	protein_coding	-	HMG_box	57	55	63	25	19	18	1.45297	1.3873	1.69275	0.653508	0.483863	0.458257
FBgn0050502	347.361	319.195	307.679	105.791	115.455	102.709	324.745	107.985	1.58882	1.00628e-25	4.48117e-24	fa2h	2R	7446189	7451553	-	1399	protein_coding	-	-	342	320	287	106	120	109	14.5504	13.4718	12.8707	4.62472	5.10057	4.63161
FBgn0033388	107.662	100.746	95.4128	40.9192	38.4851	21.6726	101.273	33.6923	1.59143	6.61142e-09	9.16184e-08	CG8046	2R	9162037	9164967	-	2325	protein_coding	-	MFS_1	106	101	89	41	40	23	2.71363	2.55854	2.40162	1.07636	1.02304	0.588069
FBgn0020660	325.016	616.445	147.943	156.69	104.872	98.94	363.135	120.167	1.59592	0.00784281	0.0346439	eIF-4B	3L	27842669	27858271	-	1922	protein_coding	-	RRM_1	320	618	138	157	109	105	9.90978	18.9378	4.50468	4.9859	3.37232	3.24757
FBgn0053282	903.952	987.509	1033.46	360.288	278.055	328.858	974.974	322.4	1.59691	1.07577e-49	1.2289e-47	CG33282	2L	3327903	3329792	+	1583	protein_coding	-	Sugar_tr	890	990	964	361	289	349	33.4639	36.8339	38.2062	13.9195	10.8561	13.1059
FBgn0003328	3413.69	3110.16	3265.48	1155.72	1067.96	1012.02	3263.11	1078.56	1.59751	1.83478e-107	5.35633e-105	scb	2R	15248784	15258498	+	5004	protein_coding	-	-	3361	3118	3046	1158	1110	1074	39.9778	36.6988	38.1901	14.125	13.1905	12.7588
FBgn0003961	7120.91	6823.79	7544.04	2490.08	2606.4	1996.7	7162.91	2364.39	1.59922	2.01543e-81	4.64505e-79	Uro	2L	7780085	7781415	+	1262	protein_coding	-	-	7011	6841	7037	2495	2709	2119	330.665	319.267	349.837	120.673	127.645	99.8147
FBgn0264549	23.3606	22.9421	15.0088	3.99211	1.92425	14.1343	20.4371	6.68355	1.60646	0.0120083	0.0491288	CR43928	2L	3476343	3477648	+	1241	lincRNA	-	-	23	23	14	4	2	15	1.10312	1.09156	0.707774	0.196737	0.0958327	0.718526
FBgn0034296	10111.1	9722.48	9767.48	3468.15	3080.73	3124.62	9867.01	3224.5	1.61372	5.88494e-155	3.36132e-152	CG10912	2R	18056064	18057065	-	910	protein_coding	-	-	9955	9747	9111	3475	3202	3316	651.129	630.846	628.149	233.083	209.235	216.619
FBgn0000565	4766.57	4817.85	4773.85	1313.41	1550.95	1801.65	4786.09	1555.33	1.62116	7.13914e-77	1.56311e-74	Eip71CD	3L	15511052	15513202	+	1354	protein_coding	-	PMSR	4693	4830	4453	1316	1612	1912	206.3	210.098	206.335	59.3246	70.7949	83.9445
FBgn0035607	172.665	220.444	221.915	68.8639	65.4246	64.0754	205.008	66.1213	1.63263	3.41092e-17	9.4935e-16	CG4835	3L	5479790	5483663	+	3735	protein_coding	-	CBM_14	170	221	207	69	68	68	2.7091	3.48494	3.47711	1.1276	1.08261	1.08228
FBgn0034276	876.529	949.605	913.39	397.215	255.926	229.918	913.174	294.353	1.63399	1.32507e-11	2.48324e-10	Sardh	2R	17753555	17756422	-	2750	protein_coding	-	DAO	863	952	852	398	266	244	18.6786	20.3891	19.4377	8.83381	5.75181	5.27449
FBgn0031801	12300.9	12058.6	11509.6	3854.38	4016.88	3684.34	11956.3	3851.87	1.63423	5.12492e-179	4.20788e-176	CG9498	2L	6349393	6351034	-	1514	protein_coding	-	-	12111	12089	10736	3862	4175	3910	476.125	470.282	444.892	155.698	163.978	153.523
FBgn0031926	75.1601	102.741	120.07	30.9389	38.4851	26.384	99.3236	31.936	1.63636	7.54189e-09	1.04039e-07	CG6739	2L	7608389	7616533	+	2718	protein_coding	-	Fz	74	103	112	31	40	28	1.6205	2.23193	2.58527	0.696161	0.875116	0.612395
FBgn0005660	282.358	215.457	254.077	86.8285	73.1216	80.0943	250.63	80.0148	1.64755	4.11062e-20	1.36367e-18	Ets21C	2L	544925	552923	-	5407	protein_coding	-	Ets	278	216	237	87	76	85	3.06024	2.35283	2.74998	0.982111	0.83582	0.934514
FBgn0010038	373.769	405.976	340.913	110.781	111.607	132.862	373.553	118.417	1.65704	7.65733e-29	4.02378e-27	GstD2	3R	12371971	12372704	+	734	protein_coding	-	GST_N	368	407	318	111	116	141	29.8414	32.6582	27.1812	9.23048	9.39761	11.4195
FBgn0042086	1189.36	1054.34	820.121	373.263	318.464	277.974	1021.27	323.234	1.66111	1.84541e-36	1.3034e-34	Tsp42Eb	2R	6998848	6999848	+	865	protein_coding	-	Tetraspannin	1171	1057	765	374	331	295	80.5764	71.9701	55.486	26.3908	22.7545	20.2735
FBgn0265455	19.2979	12.9673	13.9367	4.99014	3.84851	5.65372	15.4006	4.83079	1.67237	0.0115831	0.047701	CG44355	3L	12310805	12311961	+	977	protein_coding	-	-	19	13	13	5	4	6	1.15751	0.783686	0.834808	0.312373	0.243456	0.365073
FBgn0030929	5722.32	6059.72	5309.88	1892.26	1781.86	1687.63	5697.31	1787.25	1.6729	2.36317e-128	1.07052e-125	CG15043	X	18493193	18494168	-	903	protein_coding	-	-	5634	6075	4953	1896	1852	1791	371.361	396.234	344.127	128.159	121.958	117.905
FBgn0040531	45.7054	49.8742	42.8821	7.98423	19.2425	16.0189	46.1539	14.4152	1.67511	2.74343e-05	0.000228828	CG11741	3R	8528423	8528877	-	455	protein_coding	-	-	45	50	40	8	20	17	5.88665	6.4722	5.51552	1.07319	2.61381	2.22106
FBgn0037485	634.798	657.342	574.621	211.582	187.615	181.861	622.253	193.686	1.68519	4.93967e-45	4.7715e-43	CG14606	3R	7214339	7217083	-	1925	protein_coding	-	Sugar_tr	625	659	536	212	195	193	19.3249	20.1627	17.4692	6.72207	6.02364	5.96005
FBgn0063923	973.018	1010.45	1066.69	338.332	298.259	310.012	1016.72	315.534	1.68839	4.52019e-67	8.02456e-65	Kaz1-ORFB	3L	216625	218058	+	1276	protein_coding	-	-	958	1013	995	339	310	329	44.6871	46.7576	48.9227	16.2161	14.4466	15.3274
FBgn0259140	55.8622	45.8843	32.1616	6.9862	14.4319	19.788	44.636	13.7354	1.69603	7.26747e-05	0.000551547	CG42255	3L	11801951	11814755	-	11198	protein_coding	-	CUB	55	46	30	7	15	21	0.292341	0.241942	0.168081	0.0381553	0.0796537	0.111481
FBgn0032087	2136.98	2204.44	2146.25	726.565	600.367	663.369	2162.56	663.434	1.70523	3.00149e-99	8.38947e-97	CG9568	2L	9010583	9011358	+	644	protein_coding	-	-	2104	2210	2002	728	624	704	194.459	202.116	195.037	68.9991	57.6174	64.9845
FBgn0039241	13291.1	11436.2	12540.9	4637.84	3394.38	3375.27	12422.7	3802.5	1.70802	9.57475e-24	3.88221e-22	CG11089	3R	24877045	24881478	+	2285	protein_coding	-	-	13086	11465	11698	4647	3528	3582	340.869	295.516	321.191	124.132	91.8116	93.1885
FBgn0264994	22.3449	27.9296	30.0175	7.98423	5.77276	10.3651	26.764	8.04071	1.7326	0.000731084	0.00446917	CR44145	2L	11736402	11737541	+	1071	lincRNA	-	-	22	28	28	8	6	11	1.22265	1.53979	1.64024	0.45593	0.333133	0.610557
FBgn0040251	68.0503	47.8792	38.5939	18.9625	10.5834	16.9611	51.5078	15.5024	1.73505	9.52509e-06	8.5589e-05	Ugt86Di	3R	11151026	11153849	-	2556	protein_coding	-	UDPGT	67	48	36	19	11	18	1.5602	1.10605	0.883649	0.453723	0.25591	0.418634
FBgn0038353	15978.6	15172.7	13849.9	4738.64	4453.68	4310.02	15000.4	4500.78	1.7369	6.73955e-158	4.21607e-155	CG5399	3R	15695241	15697142	+	1546	protein_coding	-	-	15732	15211	12919	4748	4629	4574	605.678	579.484	524.273	187.456	178.046	175.877
FBgn0040730	33.5173	18.9522	22.5131	5.98817	3.84851	12.2497	24.9942	7.36213	1.75874	0.00172952	0.00955054	CG15127	2R	19680768	19681391	-	624	protein_coding	-	-	33	19	21	6	4	13	3.14772	1.79334	2.11141	0.5869	0.381181	1.23846
FBgn0032805	241.731	272.313	266.941	88.8245	84.6671	57.4794	260.328	76.9904	1.75985	6.68691e-22	2.50989e-20	CG10337	2L	19545376	19546959	-	1297	protein_coding	-	Cytochrom_B561	238	273	249	89	88	61	10.9221	12.397	12.0447	4.18839	4.03458	2.79584
FBgn0053093	49.7681	26.9321	32.1616	17.9645	8.65914	5.65372	36.2873	10.7591	1.76156	0.000276512	0.00184956	CG33093	3R	22530694	22531922	-	1055	protein_coding	-	2OG-FeII_Oxy	49	27	30	18	9	6	2.76446	1.50732	1.78405	1.0414	0.507277	0.338082
FBgn0259237	729.256	759.085	898.381	268.47	213.592	218.61	795.574	233.557	1.76881	6.88269e-48	7.53483e-46	CG42335	3R	21758764	21769301	+	2786	protein_coding	-	-	718	761	838	269	222	232	15.3395	16.0878	18.8713	5.89344	4.73835	4.95028
FBgn0035743	35.5487	54.8616	52.5306	18.9625	11.5455	11.3074	47.647	13.9385	1.77708	9.72622e-06	8.72769e-05	CG15829	3L	7128903	7129673	+	697	protein_coding	-	-	35	55	49	19	12	12	2.98884	4.64754	4.41064	1.66387	1.02377	1.02346
FBgn0032638	63.9876	56.8566	46.0983	24.9507	13.4698	10.3651	55.6475	16.2619	1.78205	3.12778e-06	3.03917e-05	SPH93	2L	17454263	17455923	-	1587	protein_coding	-	Trypsin	63	57	43	25	14	11	2.36282	2.11539	1.69992	0.961525	0.524574	0.412039
FBgn0000071	12.1881	25.9346	18.2249	3.99211	3.84851	8.48057	18.7825	5.4404	1.78342	0.00510161	0.024056	Ama	3R	6762593	6765261	+	1946	protein_coding	-	I-set	12	26	17	4	4	9	0.367033	0.786908	0.54808	0.125463	0.122228	0.27493
FBgn0263081	2728.11	2738.09	2660.84	962.099	726.405	648.293	2709.01	778.932	1.79854	3.45028e-25	1.51088e-23	CG43349	2L	1200205	1200663	+	459	protein_coding	-	-	2686	2745	2482	964	755	688	348.306	352.227	339.256	128.192	97.8114	89.1043
FBgn0033301	2104.48	2096.71	2116.23	635.744	596.518	581.39	2105.81	604.551	1.80086	2.88379e-127	1.26281e-124	CG12780	2R	8551859	8552290	-	432	protein_coding	-	-	2072	2102	1974	637	620	617	285.478	286.578	286.683	90.0022	85.3421	84.9033
FBgn0265074	33.5173	44.8868	15.0088	10.9783	8.65914	6.596	31.1376	8.74448	1.83903	0.000465121	0.00295326	CR44185	2L	135402	136128	+	727	lincRNA	-	-	33	45	14	11	9	7	2.70176	3.64562	1.20818	0.92354	0.736145	0.572383
FBgn0033788	8411.83	8395.82	7553.69	2417.22	2186.91	2168.2	8120.45	2257.45	1.84716	5.28781e-167	3.85922e-164	CG13323	2R	13044695	13047256	-	2562	protein_coding	-	-	8282	8417	7046	2422	2273	2301	192.408	193.496	172.545	57.7022	52.7565	53.3901
FBgn0039818	495.65	405.976	493.145	139.724	96.2126	142.285	464.924	126.074	1.88256	4.46322e-34	2.93167e-32	CG11318	3R	31106362	31109191	-	2764	protein_coding	-	7tm_2	488	407	460	140	100	151	10.5087	8.67261	10.4414	3.09163	2.15138	3.2476
FBgn0034187	321.969	299.245	340.913	90.8206	93.3263	76.3252	320.709	86.824	1.88561	1.19386e-31	7.00167e-30	CG6967	2R	17062775	17066546	+	3474	protein_coding	-	-	317	300	318	91	97	81	5.43121	5.0861	5.74295	1.59886	1.66034	1.38605
FBgn0267762	41.6427	23.9396	42.8821	6.9862	5.77276	15.0766	36.1548	9.27851	1.95536	6.54818e-05	0.000501594	CR46093	3R	24318816	24319782	-	967	lincRNA	-	-	41	24	40	7	6	16	2.52362	1.46177	2.5952	0.441844	0.368961	0.983596
FBgn0038095	257.982	189.522	149.015	71.858	40.4093	41.4606	198.84	51.2426	1.96037	2.96305e-15	7.31684e-14	Cyp304a1	3R	12963791	12965923	+	1716	protein_coding	-	p450	254	190	139	72	42	44	8.81016	6.52123	5.08201	2.56102	1.45542	1.52426
FBgn0052793	69.066	28.927	22.5131	8.98225	6.73488	15.0766	40.1687	10.2646	1.967	0.000109198	0.000802279	CG32793	X	2929796	2932626	+	2687	protein_coding	-	-	68	29	21	9	7	16	1.50629	0.635658	0.490331	0.204443	0.154912	0.353977
FBgn0031033	95.4736	83.7887	62.1791	14.9704	24.0532	22.6149	80.4805	20.5461	1.96821	1.18924e-09	1.82725e-08	CG14219	X	19587348	19590170	-	2308	protein_coding	-	-	94	84	58	15	25	24	2.42415	2.14357	1.57663	0.396692	0.644109	0.618157
FBgn0063497	12018.5	12264.1	10223.1	3052.97	2695.88	3063.37	11501.9	2937.41	1.96936	7.4674e-149	4.08747e-146	GstE3	2R	18400713	18401467	+	755	protein_coding	-	GST_C	11833	12295	9536	3059	2802	3251	932.857	959.125	792.424	247.303	220.687	255.972
FBgn0266853	17.2665	11.9698	8.57643	2.99408	1.92425	4.71143	12.6042	3.20992	1.97204	0.0115867	0.047701	CR45314	2R	18057915	18059075	-	1161	lincRNA	-	-	17	12	8	3	2	5	0.871533	0.608755	0.432311	0.15772	0.102436	0.256012
FBgn0265831	11.1724	19.9497	10.7205	4.99014	1.92425	3.76914	13.9476	3.56118	1.97548	0.00815727	0.0357341	CR44620	X	13390235	13390560	-	326	lincRNA	-	-	11	20	10	5	2	4	2.00836	3.61332	1.92451	0.93616	0.364811	0.7294
FBgn0259716	1931.82	1760.56	1731.37	493.026	438.73	444.759	1807.91	458.838	1.97894	3.39406e-117	1.17336e-114	CG42370	2L	6383435	6385512	-	2078	protein_coding	-	-	1902	1765	1615	494	456	472	54.4794	50.0256	48.7602	14.5104	13.0489	13.5027
FBgn0260000	116.803	70.8214	118.998	17.9645	35.5987	23.5571	102.207	25.7068	1.98802	1.72556e-10	2.86582e-09	CG17570	2L	20263419	20264424	-	1006	protein_coding	-	-	115	71	111	18	37	25	6.80404	4.15675	6.9225	1.09212	2.18705	1.47729
FBgn0035445	185.869	159.597	145.799	45.9093	46.1821	31.0954	163.755	41.0623	1.99848	4.52384e-18	1.34153e-16	CG12014	3L	3378268	3380083	+	1636	protein_coding	-	Sulfatase	183	160	136	46	48	33	6.65787	5.7601	5.21547	1.71622	1.74467	1.1991
FBgn0036995	965.908	862.824	870.508	250.505	210.706	204.476	899.746	221.896	2.02099	6.11775e-74	1.25576e-71	atk	3L	20454690	20464862	-	5188	protein_coding	-	-	951	865	812	251	219	217	10.9106	9.81996	9.81961	2.95305	2.51015	2.48647
FBgn0054005	54.8465	62.8415	43.9542	14.9704	9.62126	15.0766	53.8807	13.2228	2.02872	1.52714e-07	1.81886e-06	CG34005	2R	18048108	18048909	+	694	protein_coding	-	-	54	63	41	15	10	16	4.63128	5.34656	3.70649	1.31926	0.856832	1.37051
FBgn0013710	81.2541	77.8038	108.277	18.9625	20.2047	25.4417	89.1118	21.5363	2.04523	2.38095e-11	4.35633e-10	mt:tRNA:Y	dmel_mitochondrion_genome	1403	1468	-	66	tRNA	-	-	80	78	101	19	21	27	72.1462	69.6056	96.0098	17.5714	18.9204	24.3188
FBgn0013771	2633.65	2810.91	2757.32	609.795	619.609	633.216	2733.96	620.874	2.13844	1.64037e-192	1.65765e-189	Cyp6a9	2R	14879356	14881372	-	1964	protein_coding	-	p450	2593	2818	2572	611	644	672	78.5829	84.5071	82.1613	18.9888	19.4984	20.34
FBgn0039137	2466.06	2316.16	2557.92	550.912	521.472	550.295	2446.71	540.893	2.17729	3.21759e-174	2.48644e-171	CG13604	3R	23988806	23992916	-	3259	protein_coding	-	UBA	2428	2322	2386	552	542	584	44.3437	41.9635	45.9329	10.3384	9.88941	10.6525
FBgn0005664	782.071	676.294	673.25	154.694	157.789	153.593	710.538	155.359	2.1935	4.64386e-73	9.3856e-71	Cry	2L	11944129	11947131	+	2261	protein_coding	-	Chitin_bind_4	770	678	628	155	164	163	20.2702	17.6613	17.426	4.18436	4.31319	4.28559
FBgn0037562	173.681	147.628	153.304	39.9211	27.9017	32.98	158.204	33.6009	2.23722	3.17033e-21	1.14735e-19	CG11671	3R	8287876	8288613	+	681	protein_coding	-	-	171	148	143	40	29	35	14.9457	12.7999	13.1743	3.58518	2.53225	3.05523
FBgn0033792	2362.46	2268.28	2166.62	514.983	503.192	410.837	2265.79	476.337	2.25095	2.736e-142	1.38241e-139	CG13325	2R	13110769	13126014	+	4040	protein_coding	-	-	2326	2274	2021	516	523	436	34.2685	33.1515	31.3851	7.79589	7.69796	6.41547
FBgn0085223	134.069	90.771	98.6289	25.9487	13.4698	27.3263	107.823	22.2483	2.2774	9.13939e-14	2.02469e-12	CG34194	2R	17544190	17545045	+	655	protein_coding	-	-	132	91	92	26	14	29	11.995	8.18264	8.81221	2.42287	1.27099	2.63196
FBgn0036948	108.677	90.771	103.989	18.9625	18.2804	24.4994	101.146	20.5808	2.29477	5.01599e-15	1.21578e-13	CG7298	3L	20202070	20203687	-	1323	protein_coding	-	CBM_14	107	91	97	19	19	26	4.81383	4.05112	4.59992	0.87658	0.853983	1.16825
FBgn0033302	3469.55	3471.24	3546.35	714.588	685.034	721.791	3495.72	707.138	2.30547	1.90662e-255	4.17455e-252	Cyp6a14	2R	8564187	8567202	-	2959	protein_coding	-	p450	3416	3480	3308	716	712	766	68.7132	69.2672	70.1388	14.7695	14.3084	15.3889
FBgn0051272	4797.04	4246.29	4253.91	956.111	878.421	853.711	4432.41	896.081	2.30684	1.73162e-209	1.89569e-206	CG31272	3R	10756296	10759398	-	2102	protein_coding	-	MFS_1	4723	4257	3968	958	913	906	133.737	119.279	118.434	27.8183	25.8282	25.6223
FBgn0034289	6035.15	5774.44	5886.65	1229.57	1176.68	1045	5898.74	1150.42	2.35873	4.51077e-258	1.18516e-254	CG10910	2R	18020268	18022406	+	1991	protein_coding	-	-	5942	5789	5491	1232	1223	1109	177.635	171.248	173.029	37.7691	36.5267	33.1118
FBgn0036997	900.905	655.347	679.682	173.657	144.319	108.363	745.311	142.113	2.39306	1.28848e-53	1.67592e-51	CG5955	3L	20466944	20469592	+	1314	protein_coding	-	Epimerase	887	657	634	174	150	115	40.1787	29.4485	30.2714	8.08261	6.78815	5.20266
FBgn0053542	41.6427	42.8918	43.9542	6.9862	8.65914	8.48057	42.8296	8.04197	2.41105	7.75338e-08	9.51926e-07	upd3	X	18277233	18284596	+	2221	protein_coding	-	-	41	43	41	7	9	9	1.09876	1.14028	1.15817	0.192374	0.240962	0.240889
FBgn0037724	2773.81	2502.69	2536.48	759.499	402.169	294.935	2604.33	485.535	2.42348	7.23454e-09	1.00042e-07	Fst	3R	9644978	9646154	-	1177	protein_coding	-	-	2731	2509	2366	761	418	313	138.106	125.55	126.118	39.4644	21.1181	15.8085
FBgn0022700	1629.14	1634.88	1602.72	281.444	341.555	271.378	1622.25	298.126	2.44401	5.76411e-147	3.02892e-144	Cht4	2R	21065379	21067087	-	1473	protein_coding	-	CBM_14	1604	1639	1495	282	355	288	64.814	65.5345	63.6761	11.6854	14.3311	11.6229
FBgn0004431	421.506	347.124	377.363	55.8896	74.0837	79.152	381.998	69.7084	2.45151	1.05894e-47	1.1497e-45	LysX	3L	1194739	1195302	-	564	protein_coding	-	-	415	348	352	56	77	84	43.7962	36.3407	39.1563	6.06047	8.11833	8.85367
FBgn0044050	92.4266	67.8289	79.332	15.9685	17.3183	10.3651	79.8625	14.5506	2.45893	8.75842e-13	1.82344e-11	Ilp3	3L	9801298	9802120	-	751	protein_coding	-	-	91	68	74	16	18	11	7.21222	5.33289	6.18201	1.3004	1.42524	0.870715
FBgn0034317	189.931	274.308	189.753	36.927	49.0684	31.0954	217.998	39.0303	2.4831	1.55516e-26	7.24472e-25	CG14499	2R	18187707	18188573	+	867	protein_coding	-	-	187	275	177	37	51	33	12.8378	18.6813	12.8083	2.60484	3.49789	2.26265
FBgn0033789	480.415	528.667	426.677	95.8107	68.311	83.8634	478.586	82.6617	2.53548	1.7145e-58	2.5889e-56	CG13324	2R	13049146	13049656	-	511	protein_coding	-	-	473	530	398	96	71	89	55.0944	61.0869	48.8653	11.467	8.26214	10.3536
FBgn0267469	11.1724	8.97736	20.369	1.99606	2.88638	1.88457	13.5063	2.25567	2.57804	0.00212886	0.0114525	CR45819	3L	3137599	3138012	+	414	lincRNA	-	-	11	9	19	2	3	2	1.58146	1.28037	2.87933	0.294868	0.4309	0.287179
FBgn0085456	33.5173	28.927	50.3865	1.99606	5.77276	10.3651	37.6103	6.04465	2.62425	9.32798e-07	9.9385e-06	CG34427	3L	8804764	8805812	+	865	protein_coding	-	-	33	29	47	2	6	11	2.27073	1.97458	3.40894	0.141127	0.412468	0.755961
FBgn0050121	45.7054	36.9069	54.6747	9.98028	7.69701	3.76914	45.7624	7.14881	2.68426	1.33343e-08	1.79665e-07	CR30121	2R	18739131	18741658	-	2299	lincRNA	-	-	45	37	51	10	8	4	1.16504	0.947886	1.39178	0.265496	0.206922	0.103429
FBgn0038973	3400.48	3006.42	3354.46	475.061	511.851	522.969	3253.79	503.294	2.69203	4.21511e-251	7.91056e-248	Pebp1	3R	22466034	22466679	+	646	protein_coding	-	-	3348	3014	3129	476	532	555	308.475	274.792	303.886	44.9751	48.9705	51.0721
FBgn0263080	417.443	428.918	338.769	90.8206	41.3714	32.0377	395.043	54.7432	2.85318	1.95567e-10	3.23166e-09	CG43348	2L	1199412	1199924	+	513	protein_coding	-	-	411	430	316	91	43	34	47.6861	49.3679	38.6463	10.8273	4.98433	3.93989
FBgn0010043	291.499	332.162	263.725	38.9231	35.5987	47.1143	295.795	40.5454	2.86629	8.25855e-47	8.54272e-45	GstD7	3R	12378500	12379255	+	756	protein_coding	-	GST_N	287	333	246	39	37	50	22.5958	25.9427	20.4151	3.14877	2.91028	3.93162
FBgn0266279	15.2351	7.97987	19.297	0.998028	0	4.71143	14.1707	1.90315	2.8795	0.00148464	0.00838151	CR44964	X	6746399	6748020	-	1556	lincRNA	-	-	15	8	18	1	0	5	0.573785	0.302813	0.725773	0.0392273	0	0.191022
FBgn0263402	74.1444	96.756	63.2512	7.98423	8.65914	8.48057	78.0505	8.37465	3.2211	7.59116e-16	1.95539e-14	CG43448	3R	30237094	30237734	-	529	protein_coding	-	-	73	97	59	8	9	9	8.21362	10.7996	6.99736	0.923064	1.01168	1.01137
FBgn0052198	125.944	197.502	225.131	13.9724	24.0532	16.0189	182.859	18.0148	3.34097	1.88442e-29	1.01875e-27	CG32198	3L	18526976	18527445	+	470	protein_coding	-	-	124	198	210	14	25	17	15.7033	24.8119	28.0324	1.81814	3.16299	2.15018
FBgn0264775	758.71	841.877	711.844	71.858	63.5003	81.9789	770.81	72.4457	3.41089	1.74449e-124	6.94467e-122	CG44013	3R	15508896	15509917	-	940	protein_coding	-	-	747	844	664	72	66	87	47.2999	52.882	44.3178	4.67522	4.17514	5.50192
FBgn0052037	123.913	142.64	118.998	14.9704	8.65914	12.2497	128.517	11.9598	3.42932	2.31108e-26	1.06156e-24	CG32037	3L	9489502	9492215	-	1836	protein_coding	-	-	122	143	111	15	9	13	3.95507	4.5873	3.79305	0.498673	0.291491	0.420914
FBgn0031412	77.1914	85.7836	79.332	6.9862	4.81063	7.53829	80.769	6.44504	3.64757	3.59915e-18	1.07459e-16	CG16995	2L	2307948	2308872	+	721	protein_coding	-	SCP	76	86	74	7	5	8	6.27401	7.02517	6.43924	0.592598	0.412373	0.659596
FBgn0034047	27.4233	33.9145	36.4498	3.99211	0	3.76914	32.5958	2.58709	3.65841	5.19739e-08	6.57786e-07	CG12970	2R	15855961	15857522	+	1137	protein_coding	-	-	27	34	34	4	0	4	1.41342	1.76121	1.8761	0.214732	0	0.209133
FBgn0035176	9151.24	8889.58	7646.96	712.592	582.086	732.156	8562.59	675.612	3.66389	0	0	CG13905	3L	902898	903810	+	913	protein_coding	-	-	9010	8912	7133	714	605	777	587.383	574.907	490.162	47.7337	39.404	50.591
FBgn0085246	351.424	377.049	442.758	31.9369	36.5608	22.6149	390.41	30.3709	3.68605	6.76636e-71	1.34681e-68	CG34217	2R	8227990	8228727	-	738	protein_coding	-	-	346	378	413	32	38	24	27.9053	30.1668	35.1101	2.64662	3.06184	1.93321
FBgn0034160	340.252	262.338	268.013	16.9665	24.0532	26.384	290.201	22.4679	3.68703	2.96224e-54	4.01185e-52	CG5550	2R	16816589	16817577	+	938	protein_coding	-	Fibrinogen_C	335	263	250	17	25	28	21.2574	16.5138	16.7215	1.10623	1.58487	1.77451
FBgn0033981	14792.3	15069	14144.7	1110.81	1145.89	1117.55	14668.7	1124.75	3.70505	0	0	Cyp6a21	2R	14885264	14886947	-	1631	protein_coding	-	p450	14564	15107	13194	1113	1191	1186	531.489	545.529	507.529	41.6523	43.4223	43.2269
FBgn0031034	180.79	97.7534	155.448	14.9704	5.77276	12.2497	144.664	10.9976	3.72027	5.98067e-26	2.70924e-24	CG14205	X	19592609	19595548	+	2338	protein_coding	-	-	178	98	145	15	6	13	4.53151	2.46874	3.891	0.391602	0.152603	0.330538
FBgn0020880	97.5049	86.7811	63.2512	7.98423	4.81063	5.65372	82.5124	6.14952	3.7519	6.61407e-18	1.93087e-16	CG7179	2L	7775804	7778029	-	2226	protein_coding	-	CUB	96	87	59	8	5	6	2.56693	2.30191	1.6629	0.219363	0.133567	0.160232
FBgn0040261	33.5173	59.849	33.2337	1.99606	0.962126	5.65372	42.2	2.87063	3.86814	1.09925e-09	1.69295e-08	Ugt36Bb	2L	16796595	16798273	+	1620	protein_coding	-	UDPGT	33	60	31	2	1	6	1.21246	2.18137	1.20056	0.0753551	0.0367063	0.220171
FBgn0264295	35.5487	58.8516	63.2512	3.99211	2.88638	3.76914	52.5505	3.54921	3.88849	4.44923e-12	8.73686e-11	CG43773	2L	4007690	4007984	+	295	protein_coding	-	-	35	59	59	4	3	4	7.06176	11.7794	12.5478	0.827629	0.60472	0.806048
FBgn0039091	225.48	198.499	176.889	1.99606	2.88638	12.2497	200.289	5.71072	5.12077	3.27826e-18	9.81014e-17	CG10182	3R	23587120	23589819	-	2212	protein_coding	-	-	222	199	165	2	3	13	5.97359	5.2986	4.6799	0.0551877	0.0806476	0.349367
FBgn0028519	250.872	426.923	242.284	6.9862	8.65914	9.42286	306.693	8.35606	5.19543	4.69002e-50	5.40463e-48	CG4500	2L	14027001	14029368	+	2206	protein_coding	-	AMP-binding	247	428	226	7	9	10	6.66436	11.427	6.42748	0.193682	0.242601	0.269474
FBgn0052283	24.3762	14.9623	23.5852	0	0	0	20.9746	0	6.88024	1.36221e-07	1.62686e-06	Drsl3	3L	3314996	3315355	+	360	protein_coding	-	-	24	15	22	0	0	0	3.96804	2.45404	3.83405	0	0	0
FBgn0053983	35.5487	22.9421	20.369	0	0	0	26.2866	0	7.20795	1.96259e-08	2.60694e-07	obst-H	3L	15528265	15529243	-	915	protein_coding	-	CBM_14	35	23	19	0	0	0	2.27674	1.48047	1.30278	0	0	0
FBgn0267417	14.2195	73.8138	126.502	0	0.962126	0	71.5119	0.320709	7.68876	1.79802e-06	1.82822e-05	CG45770	Y	3349651	3350374	+	660	protein_coding	-	-	14	74	118	0	1	0	1.26256	6.60361	11.217	0	0.0900972	0
FBgn0035666	3.04703	0	0	70.86	33.6744	43.3452	1.01568	49.2932	-5.58432	1.53082e-09	2.31419e-08	Jon65Aii	3L	6052321	6053215	+	833	protein_coding	-	Trypsin	3	0	0	71	35	46	0.21436	0	0	5.20249	2.49849	3.28274
FBgn0050043	9.14109	5.9849	1.07205	167.669	140.47	172.438	5.39935	160.193	-4.8723	1.95818e-31	1.13324e-29	CG30043	2R	12359436	12363165	+	3082	protein_coding	-	-	9	6	1	168	146	183	0.173811	0.11466	0.0203566	3.32716	2.81693	3.52973
FBgn0033097	1.01568	0	1.07205	16.9665	24.0532	15.0766	0.69591	18.6987	-4.7679	4.47979e-05	0.000358193	Zip42C.2	2R	6718196	6719533	-	1278	protein_coding	-	-	1	0	1	17	25	16	0.0465732	0	0.0490916	0.811925	1.16323	0.744239
FBgn0043791	10.1568	23.9396	6.43232	403.203	344.441	342.05	13.5096	363.231	-4.73978	4.24126e-28	2.15125e-26	CG8147	3R	9494801	9496723	+	1862	protein_coding	-	-	10	24	6	404	358	363	0.319659	0.759145	0.202167	13.2434	11.433	11.5891
FBgn0030098	32.5016	30.922	77.1879	1317.4	983.293	935.69	46.8705	1078.79	-4.52747	8.15929e-25	3.48015e-23	CG12057	X	9191657	9192548	+	892	protein_coding	-	-	32	31	72	1320	1022	993	2.13527	2.04687	5.06414	90.3247	68.1305	66.1771
FBgn0043576	3.04703	0.997484	0	56.8876	16.3561	19.788	1.34817	31.0106	-4.50265	6.16245e-07	6.74072e-06	PGRP-SC1a	2R	8709733	8710320	+	588	protein_coding	-	-	3	1	0	57	17	21	0.303676	0.100165	0	5.91691	1.7192	2.12307
FBgn0052282	3.04703	11.9698	8.57643	126.75	155.864	208.245	7.86442	163.62	-4.37804	1.03608e-30	5.81668e-29	Drsl4	3L	3315620	3315942	+	323	protein_coding	-	-	3	12	8	127	162	221	0.552823	2.18813	1.55391	23.9993	29.8241	40.6736
FBgn0033720	0	0	6.43232	31.9369	39.4472	60.3063	2.14411	43.8968	-4.373	0.0024163	0.0127734	CG13160	2R	12371594	12375081	+	2736	protein_coding	-	-	0	0	6	32	41	64	0	0	0.137586	0.71389	0.891093	1.39055
FBgn0051091	38.5957	78.8012	112.566	1458.12	1086.24	1240.05	76.6542	1261.47	-4.04182	2.26788e-22	8.71145e-21	CG31091	3R	25899903	25902172	+	2149	protein_coding	-	-	38	79	105	1461	1129	1316	1.05248	2.16513	3.06543	41.4965	31.2401	36.4035
FBgn0033327	7.10973	7.97987	12.8646	206.592	132.773	107.421	9.31808	148.929	-4.00519	1.25852e-26	5.88369e-25	PGRP-SC1b	2R	8713446	8715094	+	1649	protein_coding	-	-	7	8	12	207	138	114	0.252665	0.285735	0.456561	7.66209	4.97638	4.10967
FBgn0035667	69.066	87.7786	147.943	2016.02	1423.95	1415.31	101.596	1618.43	-3.99501	6.09832e-29	3.21742e-27	Jon65Ai	3L	6053493	6054443	-	951	protein_coding	-	Trypsin	68	88	138	2020	1480	1502	4.25594	5.44999	9.10409	129.649	92.5415	93.8885
FBgn0002562	19.2979	2.99245	9.64848	216.572	151.054	94.2286	10.6463	153.952	-3.85472	5.67761e-08	7.11027e-07	Lsp1alpha	X	12490291	12492982	+	2625	protein_coding	-	-	19	3	9	217	157	100	0.430816	0.0673109	0.215105	5.04578	3.55652	2.26461
FBgn0032067	20.3135	18.9522	36.4498	422.166	356.949	289.282	25.2385	356.132	-3.82742	4.4886e-58	6.70076e-56	CG9465	2L	8769159	8772344	-	2953	protein_coding	-	-	20	19	34	423	371	307	0.403119	0.378951	0.72236	8.74328	7.47078	6.18014
FBgn0031654	86.3325	93.7635	67.5394	1316.4	899.588	841.461	82.5451	1019.15	-3.62453	4.34311e-44	3.93486e-42	Jon25Bii	2L	4952243	4953136	-	894	protein_coding	-	Trypsin	85	94	63	1319	935	893	5.65912	6.19275	4.42121	90.0544	62.1913	59.3796
FBgn0035886	4.06271	2.99245	10.7205	114.773	26.9395	69.7292	5.92523	70.4806	-3.57992	9.84004e-06	8.81177e-05	Jon66Ci	3L	8391540	8392377	+	838	protein_coding	-	Trypsin	4	3	10	115	28	74	0.284108	0.210849	0.748676	8.37628	1.98687	5.24941
FBgn0051562	0	5.9849	6.43232	46.9073	42.3336	55.5949	4.13908	48.2786	-3.55206	1.73609e-10	2.87967e-09	CR31562	3R	6184455	6185629	+	1175	pseudogene	-	-	0	6	6	47	44	59	0	0.300751	0.32037	2.4415	2.22674	2.98495
FBgn0266702	18.2822	15.9597	16.0808	231.543	153.94	172.438	16.7742	185.974	-3.4695	2.00408e-33	1.28427e-31	CR45192	3R	5835478	5836178	-	649	lincRNA	-	-	18	16	15	232	160	183	1.6508	1.45201	1.45006	21.8193	14.6599	16.7621
FBgn0262854	17.2665	18.9522	6.43232	200.604	113.531	134.747	14.217	149.627	-3.38399	5.78574e-24	2.36047e-22	CG43218	3L	21258020	21258758	+	682	protein_coding	-	CBM_14	17	19	6	201	118	143	1.48365	1.64083	0.551957	17.9891	10.2885	12.4645
FBgn0011556	92.4266	65.8339	86.8363	804.411	775.474	734.983	81.6989	771.623	-3.24145	2.9375e-119	1.07194e-116	zetaTry	2R	11339186	11340132	-	947	protein_coding	-	Trypsin	91	66	81	806	806	780	5.71951	4.10476	5.36628	51.9497	50.6105	48.963
FBgn0038718	215.323	262.338	258.365	2230.59	2116.68	2356.66	245.342	2234.64	-3.18762	4.80143e-250	7.88455e-247	CG17752	3R	19610225	19612437	+	1716	protein_coding	-	Sugar_tr	212	263	241	2235	2200	2501	7.35336	9.02676	8.81126	79.4983	76.2361	86.6402
FBgn0030105	2.03135	0.997484	4.28821	24.9507	19.2425	19.788	2.43902	21.3271	-3.1454	2.62763e-05	0.000219867	CG15369	X	9216872	9217466	+	542	protein_coding	-	-	2	1	4	25	20	21	0.219633	0.108666	0.463019	2.81539	2.19425	2.30326
FBgn0051041	5.07838	3.98994	9.64848	49.9014	44.2578	54.6526	6.23893	49.6039	-3.00329	4.12179e-10	6.61147e-09	CG31041	3R	29590070	29590906	-	700	protein_coding	-	-	5	4	9	50	46	58	0.425147	0.336555	0.806645	4.35983	3.90764	4.92553
FBgn0032507	51.7995	58.8516	43.9542	517.977	329.047	394.818	51.5351	413.947	-3.00254	1.37243e-51	1.66941e-49	CG9377	2L	13359901	13361565	-	1191	protein_coding	-	Trypsin	51	59	41	519	342	419	2.54874	2.91765	2.15978	26.5983	17.0754	20.9134
FBgn0020506	55.8622	47.8792	78.2599	598.817	505.116	344.877	60.6671	482.937	-2.99463	3.56381e-21	1.28268e-19	Amyrel	2R	16651095	16652699	-	1549	protein_coding	-	-	55	48	73	600	525	366	2.11338	1.82509	2.95672	23.6427	20.1541	14.046
FBgn0083936	166.571	140.645	122.214	1214.6	954.429	1190.11	143.143	1119.71	-2.9658	1.1682e-115	3.93505e-113	Acp54A1	2R	17133445	17133750	+	306	protein_coding	-	-	164	141	114	1217	992	1263	31.8999	27.1388	23.3734	242.754	192.773	245.361
FBgn0039472	7.10973	0.997484	6.43232	45.9093	29.8259	34.8646	4.84651	36.8666	-2.93656	2.00779e-07	2.35714e-06	CG17192	3R	27017180	27018287	-	1052	protein_coding	-	Lipase	7	1	6	46	31	37	0.39605	0.0559858	0.357827	2.66895	1.75227	2.09078
FBgn0039471	450.96	339.145	278.734	2902.27	2706.46	2553.59	356.28	2720.77	-2.93244	7.36716e-45	7.01321e-43	CG6295	3R	27005899	27007055	-	1091	protein_coding	-	Lipase	444	340	260	2908	2813	2710	24.2229	18.3547	14.9516	162.692	153.321	147.662
FBgn0039778	379.863	399.991	464.199	4141.82	2613.14	2346.29	414.684	3033.75	-2.87111	6.92161e-25	2.98129e-23	Jon99Fi	3R	30488963	30489895	+	933	protein_coding	-	Trypsin	374	401	433	4150	2716	2490	23.8593	25.3137	29.1168	271.496	173.103	158.65
FBgn0033065	638.86	772.053	754.726	4431.25	6033.49	5313.55	721.88	5259.43	-2.86527	3.10231e-182	2.717e-179	Cyp6w1	2R	6173684	6176195	+	2392	protein_coding	-	p450	629	774	704	4440	6271	5639	15.6515	19.0578	18.465	113.297	155.895	140.141
FBgn0004425	3.04703	1.99497	1.07205	4.99014	19.2425	19.788	2.03802	14.6736	-2.84314	0.001377	0.00783103	LysB	3L	1207371	1207981	+	611	protein_coding	-	-	3	2	1	5	20	21	0.292245	0.192789	0.102683	0.49949	1.94645	2.04315
FBgn0031653	1032.94	985.514	1235.01	9035.15	7195.74	6886.23	1084.49	7705.71	-2.82911	1.66381e-69	3.16776e-67	Jon25Biii	2L	4949941	4950767	-	827	protein_coding	-	Trypsin	1017	988	1152	9053	7479	7308	73.1952	70.3631	87.3947	668.166	537.766	525.311
FBgn0033047	270.17	297.25	287.31	2017.01	2079.16	1920.38	284.91	2005.52	-2.81525	4.667e-224	6.13103e-221	CG7882	2R	5957621	5960183	+	2266	protein_coding	-	Sugar_tr	266	298	268	2021	2161	2038	6.98697	7.74551	7.42015	54.4382	56.7088	53.4647
FBgn0044810	14.2195	14.9623	10.7205	97.8068	84.6671	95.1709	13.3008	92.5483	-2.79444	9.30657e-17	2.51048e-15	TotX	3R	20904917	20905518	-	602	protein_coding	-	-	14	15	10	98	88	101	1.3842	1.46753	1.04218	9.93636	8.69244	9.97351
FBgn0001285	191.963	169.572	276.59	1555.93	1200.73	1202.36	212.708	1319.67	-2.6342	2.22381e-27	1.07405e-25	Jon44E	2R	8691448	8692844	+	1397	protein_coding	-	Trypsin	189	170	258	1559	1248	1276	8.05253	7.16714	11.5867	68.1157	53.1219	54.2972
FBgn0020906	415.412	433.906	436.326	3431.22	2209.04	2311.43	428.548	2650.56	-2.62872	3.51036e-34	2.32907e-32	Jon25Bi	2L	4954279	4955144	-	866	protein_coding	-	Trypsin	409	435	407	3438	2296	2453	28.1108	29.5845	29.4859	242.318	157.656	168.385
FBgn0039777	254.935	311.215	385.939	1844.36	1985.83	1969.38	317.363	1933.19	-2.60878	1.86922e-129	8.76997e-127	Jon99Fii	3R	30487016	30487928	-	913	protein_coding	-	Trypsin	251	312	360	1848	2064	2090	16.3633	20.1269	24.7383	123.546	134.429	136.081
FBgn0036996	254.935	229.421	245.5	1876.29	1371.03	1162.78	243.285	1470.03	-2.59507	1.544e-32	9.56769e-31	mag	3L	20460683	20462274	+	1477	protein_coding	-	-	251	230	229	1880	1425	1234	10.1149	9.17151	9.72732	77.6918	57.3706	49.6658
FBgn0029970	1.01568	9.97484	6.43232	41.9172	26.9395	32.98	5.80761	33.9456	-2.54432	5.49865e-06	5.14387e-05	Nek2	X	7889066	7891646	-	2581	protein_coding	-	Pkinase	1	10	6	42	28	35	0.0230611	0.228195	0.145848	0.993251	0.645097	0.806126
FBgn0051741	6.09406	8.97736	4.28821	46.9073	41.3714	24.4994	6.45321	37.5927	-2.53346	1.08423e-06	1.14222e-05	CG31741	2L	18084256	18086714	+	2046	protein_coding	-	-	6	9	4	47	43	26	0.174547	0.259078	0.122657	1.40213	1.24974	0.755424
FBgn0033446	3152.66	3127.11	2843.09	15897.6	18790.3	17536.9	3040.95	17408.3	-2.51702	5.93298e-289	1.94854e-285	CG1648	2R	9810974	9820053	-	1443	protein_coding	-	-	3104	3135	2652	15929	19530	18611	128.033	127.957	115.304	673.783	804.806	766.702
FBgn0034318	52.8152	106.731	86.8363	492.028	440.654	476.797	82.1274	469.826	-2.51559	1.84452e-47	1.95415e-45	CG14500	2R	18188978	18189654	+	677	protein_coding	-	Lectin_C	52	107	81	493	458	506	4.57174	9.30869	7.50645	44.4484	40.2283	44.4309
FBgn0032282	7.10973	0	9.64848	44.9113	22.1289	27.3263	5.58607	31.4555	-2.50687	3.96226e-05	0.000319338	CG7299	2L	10683427	10684409	-	983	protein_coding	-	-	7	0	9	45	23	29	0.42385	0	0.574417	2.79419	1.39133	1.75375
FBgn0019928	109.693	99.7484	151.16	867.287	568.617	597.409	120.2	677.771	-2.49642	3.20128e-20	1.07558e-18	Ser8	2R	13434207	13435045	+	839	protein_coding	-	Trypsin	108	100	141	869	591	634	7.66177	7.01991	10.5438	63.2201	41.8872	44.9211
FBgn0036381	486.509	466.823	546.747	2801.47	2802.67	2849.47	500.026	2817.87	-2.49574	2.79574e-226	4.08085e-223	CG8745	3L	13860027	13866905	-	2429	protein_coding	-	Aminotran_3	479	468	510	2807	2913	3024	11.7375	11.3478	13.1729	70.5363	71.3129	74.0078
FBgn0043575	245.794	265.331	256.221	1587.86	1268.08	1366.31	255.782	1407.42	-2.45968	1.67598e-118	5.95063e-116	PGRP-SC2	2R	8716950	8717695	+	746	protein_coding	-	-	242	266	239	1591	1318	1450	19.3083	21.0008	20.1001	130.175	105.059	115.545
FBgn0000473	2746.39	3151.05	2905.27	15532.3	16905.5	15268.8	2934.24	15902.2	-2.43807	1.2118e-304	5.30646e-301	Cyp6a2	2R	6779749	6781491	-	1674	protein_coding	-	p450	2704	3159	2710	15563	17571	16204	96.1432	111.144	101.567	567.46	624.161	575.427
FBgn0052379	17.2665	14.9623	18.2249	82.8363	106.796	80.0943	16.8179	89.9089	-2.42044	6.96747e-14	1.56732e-12	CG32379	3L	7396355	7398208	+	1238	protein_coding	-	-	17	15	17	83	111	85	0.817326	0.713615	0.861522	4.09218	5.3316	4.08151
FBgn0267077	1.01568	4.98742	2.14411	7.98423	21.1668	14.1343	2.71573	14.4284	-2.40356	0.0033	0.0166675	CR45521	X	14540747	14541997	-	1251	lincRNA	-	-	1	5	2	8	22	15	0.0475784	0.2354	0.100302	0.390329	1.04573	0.712783
FBgn0033826	109.693	156.605	117.926	742.533	668.678	584.217	128.075	665.143	-2.37452	4.56236e-61	7.30923e-59	CG4734	2R	13297202	13298467	-	1011	protein_coding	-	-	108	157	110	744	695	620	6.35828	9.14623	6.82621	44.9179	40.8779	36.4555
FBgn0028396	128.991	145.633	150.088	831.357	796.641	549.353	141.57	725.784	-2.35802	9.34423e-54	1.23995e-51	TotA	3R	20871036	20871700	+	579	protein_coding	-	-	127	146	140	833	828	583	13.0555	14.8514	15.1701	87.8141	85.0368	59.8567
FBgn0038719	124.928	192.514	161.88	948.127	754.307	729.329	159.774	810.588	-2.34202	8.90221e-60	1.39224e-57	CG16727	3R	19613381	19615784	+	2014	protein_coding	-	Sugar_tr	123	193	151	950	784	774	3.63507	5.64406	4.70387	28.7913	23.1479	22.8457
FBgn0039685	561.669	424.928	380.579	2821.43	1939.65	2079.62	455.725	2280.23	-2.3227	1.02155e-21	3.791e-20	Obp99b	3R	29716254	29716896	-	594	protein_coding	-	-	553	426	355	2827	2016	2207	55.4123	42.2393	37.4956	290.494	201.818	220.871
FBgn0003356	1805.87	2006.94	2198.78	11017.2	10010	8606.84	2003.86	9878.01	-2.30161	4.52473e-155	2.70188e-152	Jon99Cii	3R	29923754	29924615	-	862	protein_coding	-	Trypsin	1778	2012	2051	11039	10404	9134	122.77	137.472	149.278	781.664	717.709	629.908
FBgn0002565	34.533	36.9069	43.9542	263.479	154.902	128.151	38.4647	182.178	-2.24408	1.17525e-16	3.14445e-15	Lsp2	3L	12129393	12131869	+	2477	protein_coding	-	-	34	37	41	264	161	136	0.816996	0.87977	1.03847	6.50542	3.86505	3.26389
FBgn0032144	767.851	964.567	991.65	4408.29	4443.1	3904.83	908.023	4252.07	-2.22765	8.04692e-140	3.91528e-137	CG17633	2L	9769060	9770409	+	1350	protein_coding	-	-	756	967	925	4417	4618	4144	33.3315	42.1877	42.9879	199.706	203.411	182.477
FBgn0011555	501.744	640.385	749.365	3204.67	2818.07	2782.57	630.498	2935.1	-2.21916	8.08077e-37	5.83281e-35	thetaTry	2R	11341714	11342760	-	1047	protein_coding	-	Trypsin	494	642	699	3211	2929	2953	28.0833	36.1145	41.886	187.194	166.352	167.664
FBgn0003357	1588.52	1753.58	1990.8	8826.56	8424.38	7517.56	1777.63	8256.17	-2.21584	2.23604e-163	1.54605e-160	Jon99Ciii	3R	29922216	29923455	+	1240	protein_coding	-	Trypsin	1564	1758	1857	8844	8756	7978	75.0727	83.5008	93.9568	435.336	419.894	382.468
FBgn0010388	46.7211	60.8465	25.7293	293.42	150.092	174.323	44.4323	205.945	-2.21017	9.81265e-07	1.04127e-05	Dro	2R	14745961	14746714	+	754	protein_coding	-	-	46	61	24	294	156	185	3.63123	4.76488	1.997	23.7998	12.3029	14.5856
FBgn0265843	4.06271	2.99245	2.14411	8.98225	23.091	8.48057	3.06642	13.518	-2.13649	0.00794121	0.0350314	CR44632	2R	20084960	20086695	+	1549	lincRNA	-	-	4	3	2	9	24	9	0.153701	0.114068	0.0810059	0.354641	0.92133	0.345394
FBgn0030837	178.759	231.416	176.889	1013	824.542	738.752	195.688	858.764	-2.13186	2.26725e-55	3.13525e-53	CG8661	X	17283762	17284500	-	677	protein_coding	-	-	176	232	165	1015	857	784	15.4736	20.1833	15.2909	91.5114	75.2744	68.8415
FBgn0038479	5.07838	4.98742	15.0088	24.9507	29.8259	53.7103	8.35818	36.1623	-2.12715	5.38903e-05	0.000421403	CG17477	3R	17126088	17126938	-	851	protein_coding	-	Trypsin	5	5	14	25	31	57	0.34971	0.346046	1.03214	1.79311	2.16614	3.9817
FBgn0003358	1519.45	1781.51	1664.9	8311.58	6604.04	6574.33	1655.29	7163.31	-2.1134	1.42633e-126	6.04443e-124	Jon99Ci	3R	29925226	29926189	-	907	protein_coding	-	Trypsin	1496	1786	1553	8328	6864	6977	98.1729	115.976	107.424	560.442	450.013	457.282
FBgn0085358	119.85	95.7585	90.0525	429.152	459.896	419.317	101.887	436.122	-2.09648	3.23412e-45	3.14716e-43	Diedel3	X	19050442	19053160	+	2719	protein_coding	-	-	118	96	84	430	478	445	2.58309	2.07948	1.93824	9.65288	10.4538	9.72913
FBgn0033140	2.03135	5.9849	2.14411	17.9645	16.3561	9.42286	3.38679	14.5812	-2.09527	0.00575843	0.026618	CG12836	2R	7068572	7069896	+	704	protein_coding	-	-	2	6	2	18	17	10	0.169093	0.501963	0.178236	1.56062	1.43592	0.844404
FBgn0034407	115.787	94.761	22.5131	494.024	209.744	291.166	77.6871	331.645	-2.09309	0.00349004	0.0175031	DptB	2R	18867391	18867895	+	449	protein_coding	-	-	114	95	21	495	218	309	15.1121	12.4615	2.93434	67.2909	28.8712	40.9105
FBgn0037323	56.8779	42.8918	82.5481	223.558	278.055	271.378	60.7726	257.664	-2.08983	5.86633e-24	2.38594e-22	CG2663	3R	5400594	5404135	-	1645	protein_coding	-	-	56	43	77	224	289	288	2.02623	1.53956	2.93672	8.31151	10.4469	10.4076
FBgn0028948	11.1724	7.97987	3.21616	28.9428	30.788	35.8069	7.45616	31.8459	-2.08663	4.90988e-05	0.000386929	CG15253	2L	15615357	15616351	-	942	protein_coding	-	Astacin	11	8	3	29	32	38	0.695039	0.500187	0.199806	1.87908	2.02001	2.39804
FBgn0002563	579.951	365.079	462.055	3057.96	1346.98	1363.49	469.028	1922.81	-2.03544	4.11695e-06	3.91632e-05	Lsp1beta	2L	898500	901316	+	2749	protein_coding	-	-	571	366	431	3064	1400	1447	12.3631	7.84151	9.8365	68.0317	30.2837	31.2908
FBgn0038481	145.242	178.55	226.203	763.492	717.746	743.464	183.332	741.567	-2.01852	6.94805e-54	9.31393e-52	CG17475	3R	17129339	17130426	-	1088	protein_coding	-	Trypsin	143	179	211	765	746	789	7.82302	9.68986	12.1672	42.9171	40.7723	43.1093
FBgn0051267	84.3011	82.7912	66.4673	303.401	310.767	323.204	77.8532	312.457	-2.0027	1.31432e-33	8.46382e-32	CG31267	3R	17134197	17135283	+	921	protein_coding	-	Trypsin	83	83	62	304	323	343	5.36396	5.30777	4.22348	20.1471	20.8544	22.139
FBgn0032266	53.8308	97.7534	88.9804	319.369	331.934	308.127	80.1882	319.81	-1.99612	5.08022e-28	2.55705e-26	CG18302	2L	10534322	10536587	+	2144	protein_coding	-	-	53	98	83	320	345	327	1.47136	2.69212	2.4288	9.11009	9.56863	9.06663
FBgn0032896	63.9876	68.8264	96.4848	297.412	310.767	286.455	76.4329	298.211	-1.96778	5.55627e-29	2.94325e-27	CG14400	2L	20856987	20857891	-	905	protein_coding	-	-	63	69	90	298	323	304	4.14342	4.49049	6.23924	20.0986	21.2231	19.9686
FBgn0032913	108.677	177.552	235.852	735.547	614.799	643.581	174.027	664.642	-1.93397	4.94751e-10	7.84969e-09	CG9259	2L	21089375	21090999	+	1566	protein_coding	-	-	107	178	220	737	639	683	4.06686	6.69455	8.81392	28.7259	24.2641	25.927
FBgn0050047	70.0817	105.733	79.332	306.395	299.221	357.126	85.049	320.914	-1.91439	4.18275e-28	2.1298e-26	CG30047	2R	12351793	12355413	+	2809	protein_coding	-	-	69	106	74	307	311	379	1.46206	2.22253	1.65279	6.6709	6.58361	8.02067
FBgn0085693	2.03135	6.98239	4.28821	4.99014	24.0532	20.7303	4.43399	16.5912	-1.90373	0.0104954	0.0439943	CG41562	X	22251626	22252340	+	642	protein_coding	-	RRM_1	2	7	4	5	25	22	0.185422	0.64218	0.390898	0.475371	2.31558	2.03709
FBgn0262825	86.3325	66.8314	80.404	302.403	278.055	287.397	77.856	289.285	-1.8945	5.1196e-29	2.72292e-27	CR43196	3R	17382129	17382767	-	543	lincRNA	-	-	85	67	75	303	289	305	9.31722	7.26722	8.66562	34.0597	31.6485	33.3905
FBgn0044812	21.3292	24.9371	50.3865	97.8068	157.789	101.767	32.2176	119.121	-1.89345	7.06802e-10	1.10539e-08	TotC	3R	20872988	20873580	+	530	protein_coding	-	-	21	25	47	98	164	108	2.35836	2.77816	5.56365	11.2862	18.4002	12.1135
FBgn0036428	1802.83	1978.01	1910.4	7062.05	6901.33	7010.61	1897.08	6991.33	-1.88174	3.32575e-221	3.97185e-218	Gbs-70E	3L	14540937	14550975	-	2846	protein_coding	-	-	1775	1983	1782	7076	7173	7440	37.1219	41.0375	39.2836	151.758	149.872	155.404
FBgn0039313	451.976	566.571	682.898	1556.92	2267.73	2415.08	567.148	2079.91	-1.875	4.55058e-14	1.04512e-12	CG11892	3R	25281548	25283237	+	1607	protein_coding	-	-	445	568	637	1560	2357	2563	16.4821	20.8174	24.8692	59.2525	87.2166	94.8104
FBgn0040959	199.073	272.313	276.59	894.233	837.05	1002.59	249.325	911.292	-1.87072	1.65481e-52	2.0704e-50	Peritrophin-15a	2L	8395665	8396096	-	361	protein_coding	-	-	196	273	258	896	870	1064	32.3159	44.5399	44.8384	151.495	143.307	175.209
FBgn0264515	11.1724	3.98994	11.7926	22.9546	28.8638	46.172	8.98499	32.6635	-1.87039	0.00026811	0.00179794	CR43914	3L	13216103	13217527	+	1321	lincRNA	-	-	11	4	11	23	30	49	0.495629	0.178341	0.52243	1.06273	1.35044	2.20504
FBgn0036831	103.599	154.61	118.998	429.152	483.95	455.124	125.736	456.075	-1.8576	1.27785e-35	8.698e-34	CG6839	3L	18917581	18919259	+	1325	protein_coding	-	-	102	155	111	430	503	483	4.58196	6.88984	5.25588	19.8084	22.5739	21.6698
FBgn0051266	84.3011	89.7736	77.1879	296.414	274.206	326.031	83.7542	298.884	-1.83424	2.98521e-28	1.5319e-26	CG31266	3R	17132662	17133719	+	993	protein_coding	-	Trypsin	83	90	72	297	285	346	4.97503	5.3381	4.54906	18.256	17.0668	20.7133
FBgn0085485	20.3135	20.9472	8.57643	70.86	53.8791	53.7103	16.6124	59.4831	-1.83191	9.15728e-07	9.77248e-06	CG34456	3L	9362108	9362734	+	627	protein_coding	-	-	20	21	8	71	56	57	1.89858	1.97263	0.800498	6.91176	5.31099	5.40419
FBgn0033774	4022.08	3536.08	3185.07	13671	12056.4	11586.3	3581.08	12437.9	-1.79607	1.65498e-107	4.94125e-105	CG12374	2R	12762113	12763825	+	1464	protein_coding	-	-	3960	3545	2971	13698	12531	12296	160.998	142.616	127.321	571.102	508.979	499.282
FBgn0052284	12.1881	8.97736	5.36027	47.9054	22.1289	21.6726	8.84191	30.5689	-1.78212	0.000741522	0.00450572	CG32284	3L	3186664	3187245	+	457	protein_coding	-	-	12	9	5	48	23	23	1.5629	1.1599	0.686423	6.41095	2.99273	2.99181
FBgn0040256	1642.35	2096.71	1705.64	6327.5	6115.28	6204.01	1814.9	6215.59	-1.77565	6.56909e-110	2.05472e-107	Ugt86Dd	3R	11126597	11128328	-	1671	protein_coding	-	UDPGT	1617	2102	1591	6340	6356	6584	57.5971	74.0883	59.7354	231.585	226.184	234.227
FBgn0038412	320.954	294.258	237.996	850.32	1015.04	1033.69	284.402	966.35	-1.76349	2.03592e-50	2.36689e-48	Zip89B	3R	16305758	16308700	+	2011	protein_coding	-	-	316	295	222	852	1055	1097	9.35281	8.63979	6.92594	25.8598	31.1958	32.4278
FBgn0031942	128.991	131.668	149.015	471.069	478.177	422.144	136.558	457.13	-1.74409	1.51677e-37	1.12575e-35	CG7203	2L	7752170	7753186	-	730	protein_coding	-	-	127	132	139	472	497	448	10.355	10.6499	11.9462	39.4654	40.4845	36.482
FBgn0264471	11.1724	11.9698	12.8646	34.931	42.3336	42.4029	12.0023	39.8891	-1.73443	3.52612e-05	0.000287183	CR43879	3L	4703378	4703979	+	476	lincRNA	-	-	11	12	12	35	44	45	1.37548	1.4848	1.58166	4.48806	5.49669	5.6199
FBgn0033216	96.4893	71.8189	69.6835	249.507	236.683	305.301	79.3305	263.83	-1.73309	8.33713e-21	2.88223e-19	CG1946	2R	7714923	7716781	+	1189	protein_coding	-	-	95	72	65	250	246	324	4.75564	3.56652	3.42981	12.8338	12.3029	16.1989
FBgn0038525	11.1724	19.9497	13.9367	57.8856	44.2578	47.1143	15.0196	49.7526	-1.72467	7.87926e-06	7.21826e-05	CG14329	3R	17609359	17610533	+	1103	protein_coding	-	-	11	20	13	58	46	50	0.593587	1.06794	0.739445	3.20959	2.47992	2.69474
FBgn0259682	591.124	617.443	544.603	1783.48	1917.52	2090.93	584.39	1930.64	-1.72364	2.04393e-88	5.26492e-86	Jabba	2R	18757074	18761082	-	2417	protein_coding	-	-	582	619	508	1787	1993	2219	14.3322	15.0837	13.1864	45.1279	49.0327	54.5763
FBgn0016123	1644.38	1798.46	1566.27	5696.74	5387.91	4995.06	1669.7	5359.9	-1.68217	6.21402e-121	2.33239e-118	Aph-4	3R	31048929	31052540	+	2412	protein_coding	-	-	1619	1803	1461	5708	5600	5301	39.9518	44.0263	38.0024	144.446	138.059	130.648
FBgn0030981	17.2665	19.9497	11.7926	53.8935	55.8033	48.0566	16.3363	52.5845	-1.68147	4.97238e-06	4.66254e-05	CG14191	X	19081665	19082566	+	787	protein_coding	-	-	17	20	11	54	58	51	1.28571	1.49675	0.876912	4.1881	4.38237	3.85229
FBgn0038083	51.7995	51.8692	66.4673	192.619	182.804	161.131	56.712	178.851	-1.65907	9.0117e-16	2.31677e-14	CG5999	3R	12741958	12743680	-	1667	protein_coding	-	UDPGT	51	52	62	193	190	171	1.82097	1.83722	2.33343	7.06674	6.77756	6.09795
FBgn0053301	372.753	415.951	387.011	1228.57	1219.01	1212.72	391.905	1220.1	-1.63806	5.75087e-76	1.23851e-73	CG33301	2L	10049580	10051201	+	1563	protein_coding	-	-	367	417	361	1231	1267	1287	13.9757	15.7134	14.4906	48.0725	48.2029	48.9489
FBgn0250815	6728.86	5506.11	6604.92	21900.7	18682.6	17277.8	6279.96	19287	-1.61884	6.0276e-79	1.36525e-76	Jon65Aiv	3L	6039155	6040135	+	904	protein_coding	-	Trypsin	6625	5520	6161	21944	19418	18336	436.199	359.637	427.583	1481.65	1277.3	1205.76
FBgn0035343	286.421	235.406	304.463	794.43	893.815	844.288	275.43	844.178	-1.61747	1.76527e-47	1.8854e-45	CG16762	3L	2474667	2475614	-	885	protein_coding	-	-	282	236	284	796	929	896	18.9659	15.7059	20.1332	54.8994	62.4206	60.1849
FBgn0002939	485.493	506.722	594.99	1642.75	1578.85	1638.64	529.068	1620.08	-1.61565	3.73856e-75	7.92153e-73	ninaD	2L	18081628	18083608	+	1788	protein_coding	-	-	478	508	555	1646	1641	1739	15.9121	16.7336	19.4744	56.1901	54.5753	57.8169
FBgn0085256	67.0346	61.844	35.3778	192.619	175.107	136.631	54.7521	168.119	-1.6136	8.38497e-12	1.60166e-10	CG34227	2R	11248126	11248610	+	485	protein_coding	-	-	66	62	33	193	182	145	8.09971	7.52911	4.26884	24.2892	22.3144	17.7725
FBgn0250836	242.747	297.25	352.706	910.202	849.558	930.978	297.568	896.913	-1.59327	7.11216e-42	6.0279e-40	CG8628	3L	7130874	7131505	+	436	protein_coding	-	-	239	298	329	912	883	988	32.6271	40.2553	47.3421	127.675	120.429	134.708
FBgn0262363	80.2384	117.703	123.286	236.533	307.88	400.472	107.076	314.962	-1.55834	4.81352e-15	1.16886e-13	CG43061	3R	8049673	8050059	+	329	protein_coding	-	-	79	118	115	237	320	425	14.2922	21.1242	21.9301	43.9694	57.8375	76.792
FBgn0038482	28.4389	39.8994	37.5219	119.763	95.2505	96.1132	35.2867	103.709	-1.55479	3.87044e-09	5.52674e-08	CG4053	3R	17131211	17132198	-	925	protein_coding	-	Trypsin	28	40	35	120	99	102	1.8017	2.5469	2.37391	7.91839	6.36427	6.55513
FBgn0030859	771.914	689.261	765.446	2368.32	2254.26	1907.19	742.207	2176.59	-1.55226	4.22225e-66	7.20359e-64	CG12990	X	17669208	17671888	-	2330	protein_coding	-	-	760	691	714	2373	2343	2024	19.4144	17.4669	19.2256	62.1641	59.7959	51.639
FBgn0052499	10.1568	9.97484	13.9367	34.931	30.788	32.98	11.3561	32.8997	-1.53795	0.000577478	0.00359541	Cda4	X	22583634	22632710	-	1934	protein_coding	-	CBM_14	10	10	13	35	32	35	0.307759	0.304535	0.421721	1.10461	0.983895	1.07581
FBgn0265541	427.6	520.687	436.326	1430.17	1150.7	1439.81	461.537	1340.23	-1.53729	1.09437e-46	1.11448e-44	CR44391	2R	17135595	17136325	+	731	pseudogene	-	-	421	522	407	1433	1196	1528	34.2793	42.0578	34.9313	119.654	97.2902	124.259
FBgn0039475	729.256	799.982	885.516	2881.31	2115.72	1940.17	804.918	2312.4	-1.52251	8.43543e-15	2.01118e-13	CG6277	3R	27022071	27023217	-	1085	protein_coding	-	Lipase	718	802	826	2887	2199	2059	39.3878	43.535	47.7626	162.411	120.518	112.811
FBgn0042201	127.975	151.618	165.096	410.19	437.767	414.606	148.23	420.854	-1.50675	6.47778e-28	3.21127e-26	Nplp3	3L	16318024	16318690	+	538	protein_coding	-	-	126	152	154	411	455	440	13.9398	16.6401	17.9588	46.6291	50.2903	48.6176
