# Supplementary material for: Auxin exposure disrupts feeding behavior and fatty acid metabolism in adult Drosophila
Source: eLife. 2024 Jan 19;12:RP91953. doi: 10.7554/eLife.91953 (PMC10945601; doi:10.7554/eLife.91953)
Supplement: Figure 3—source data 4. [file elife-91953-fig3-data4.xlsx]

## Sheet: Sheet1
gene_id	AID_10_m_1	AID_10_m_2	AID_10_m_3	AID_0_m_1	AID_0_m_2	AID_0_m_3	AID_m_10	AID_m	log2FoldChange	pvalue	padj	gene_name	gene_chr	gene_start	gene_end	gene_strand	gene_length	gene_biotype	gene_description	tf_family	AID_10_m_1_count	AID_10_m_2_count	AID_10_m_3_count	AID_0_m_1_count	AID_0_m_2_count	AID_0_m_3_count	AID_10_m_1_fpkm	AID_10_m_2_fpkm	AID_10_m_3_fpkm	AID_0_m_1_fpkm	AID_0_m_2_fpkm	AID_0_m_3_fpkm
FBgn0033659	613.751	688.816	660.854	243.695	179.271	270.39	654.474	231.119	1.50203	2.38642e-27	1.92339e-25	Damm	2R	11864112	11866383	-	2028	protein_coding	-	Peptidase_C14	606	681	634	248	186	278	17.1318	19.2129	18.2263	7.12295	5.39333	8.16595
FBgn0010531	585.393	524.957	602.482	162.136	194.692	245.102	570.944	200.643	1.50837	1.45433e-25	1.10279e-23	Ccs	2R	10121486	10122574	-	977	protein_coding	-	-	578	519	578	165	202	252	33.918	30.3939	34.4914	9.83706	12.1582	15.3651
FBgn0038431	81.0233	100.136	77.1344	29.4792	24.0956	35.9872	86.098	29.854	1.52876	2.09051e-07	3.61537e-06	CG10405	3R	16454492	16455797	+	929	protein_coding	-	Trypsin	80	99	74	30	25	37	4.9371	6.09723	4.64401	1.88097	1.58247	2.37255
FBgn0025686	39.4988	29.3328	103.193	23.5834	18.3126	17.5073	57.3417	19.8011	1.53278	0.00052994	0.00451842	Amnionless	2L	287252	289144	-	1893	protein_coding	-	-	39	29	99	24	19	18	1.18117	0.876517	3.04903	0.738476	0.590221	0.566438
FBgn0010241	2588.69	2401.25	2673.64	724.206	980.208	941.502	2554.53	881.972	1.53402	1.41072e-50	2.41046e-48	Mdr50	2R	14246966	14252597	+	4256	protein_coding	-	ABC_membrane	2556	2374	2565	737	1017	968	34.4316	31.9148	35.1369	10.0865	14.0518	13.5489
FBgn0034052	605.649	422.798	742.158	189.65	211.077	206.197	590.201	202.308	1.5442	3.9432e-20	2.24587e-18	CG8299	2R	15940610	15941483	-	874	protein_coding	-	Trypsin	598	418	712	193	219	212	39.2272	27.3639	47.4948	12.8624	14.7348	14.4496
FBgn0265185	3303.72	3522.98	3341.79	1104.49	1243.33	1112.68	3389.5	1153.5	1.55497	1.55e-89	6.4075e-87	CG44250	2R	12950404	12952293	-	1100	protein_coding	-	-	3262	3483	3206	1124	1290	1144	170.016	181.165	169.921	59.5182	68.9618	61.9532
FBgn0035904	2997.86	3257.97	3079.12	1005.24	1040.93	1112.68	3111.65	1052.95	1.56322	1.07538e-90	4.59366e-88	GstO3	3L	8518885	8520295	+	881	protein_coding	-	-	2960	3221	2954	1023	1080	1144	192.625	209.184	195.484	67.6357	72.0874	77.3536
FBgn0039872	9579.99	10857.2	9899.26	3179.82	3514.1	3526.74	10112.1	3406.89	1.56954	9.57371e-102	5.11196e-99	salt	3R	31751825	31754705	-	2114	protein_coding	-	-	9459	10734	9497	3236	3646	3626	256.53	290.516	261.914	89.1619	101.42	102.177
FBgn0037563	1157.62	1232.99	1127.83	408.778	385.529	390.996	1172.81	395.101	1.56985	6.96119e-60	1.78415e-57	CG11672	3R	8289395	8290578	-	1122	protein_coding	-	-	1143	1219	1082	416	400	402	58.4051	62.1618	56.2227	21.5962	20.9642	21.3434
FBgn0039107	175.213	208.364	249.123	62.889	76.142	73.9196	210.9	70.9835	1.57017	1.14799e-14	4.17939e-13	CG10300	3R	23711527	23713313	+	1484	protein_coding	-	-	173	206	239	64	79	76	6.68359	7.9423	9.38948	2.51201	3.13044	3.05077
FBgn0035929	369.669	365.143	261.631	89.4203	120.478	125.469	332.148	111.789	1.57105	7.55144e-18	3.62441e-16	CG13311	3L	8801540	8802164	-	568	protein_coding	-	-	365	361	251	91	125	129	36.8419	36.364	25.7634	9.33188	12.9412	13.5292
FBgn0038353	12292.2	14024.1	13154.5	4294.14	4302.51	4548	13157	4381.55	1.58631	6.86894e-117	4.40128e-114	CG5399	3R	15695241	15697142	+	1546	protein_coding	-	-	12137	13865	12620	4370	4464	4676	450.09	513.125	475.913	164.645	169.796	180.175
FBgn0267339	219.776	236.686	212.641	65.8369	76.142	78.7827	223.034	73.5872	1.59959	8.68068e-18	4.15085e-16	p38c	3R	24149020	24150203	-	1184	protein_coding	-	Pkinase	217	234	204	67	79	81	10.5076	11.3078	10.0451	3.29609	3.92362	4.07534
FBgn0041621	140.778	154.756	127.167	45.2015	48.1912	45.7134	140.9	46.3687	1.60364	3.04104e-12	9.10535e-11	Or82a	3R	4256972	4258444	+	1158	protein_coding	-	-	139	153	122	46	50	47	6.88183	7.55955	6.14227	2.3138	2.53906	2.41779
FBgn0038463	1888.85	2083.64	2220.22	594.498	726.723	691.537	2064.24	670.919	1.62113	7.29876e-63	2.03334e-60	CG3534	3R	16996446	16999449	+	1979	protein_coding	-	FGGY_N	1865	2060	2130	605	754	711	54.0294	59.5572	62.7496	17.8068	22.4046	21.402
FBgn0038450	6163.85	5977.83	5806.97	1882.74	2348.84	1591.22	5982.88	1940.93	1.62403	7.49832e-54	1.39262e-51	CG17560	3R	16617950	16619878	+	1712	protein_coding	-	NAD_binding_4	6086	5910	5571	1916	2437	1636	203.81	197.514	189.717	65.188	83.7073	56.9259
FBgn0031910	1218.39	1386.74	1373.83	473.633	397.095	420.174	1326.32	430.301	1.62418	2.65596e-57	6.07788e-55	CG15818	2L	7410909	7412229	+	1321	protein_coding	-	Lectin_C	1203	1371	1318	482	412	432	52.2108	59.381	58.1688	21.253	18.3403	19.481
FBgn0259748	1736.94	1948.11	1961.71	515.886	620.702	689.592	1882.25	608.727	1.62839	4.16128e-55	8.33231e-53	CG42397	3L	11973085	11973790	-	651	protein_coding	-	CBM_14	1715	1926	1882	525	644	709	151.036	169.273	168.545	46.9737	58.1724	64.8777
FBgn0032805	214.712	182.066	189.709	66.8196	57.8294	64.1933	195.495	62.9474	1.6353	2.56911e-16	1.09379e-14	CG10337	2L	19545376	19546959	-	1297	protein_coding	-	Cytochrom_B561	212	180	182	68	60	66	9.37116	7.94046	8.18104	3.05383	2.72034	3.03134
FBgn0040069	278.517	282.202	264.759	101.212	94.4547	67.1112	275.159	87.5926	1.65166	5.73863e-20	3.254e-18	vanin-like	X	6200188	6202559	-	1864	protein_coding	-	CN_hydrolase	275	279	254	103	98	69	8.45832	8.5639	7.94447	3.2186	3.09166	2.20513
FBgn0266680	68.8698	74.8493	59.4143	31.4445	17.3488	15.562	67.7111	21.4518	1.66006	1.74272e-06	2.59686e-05	CR45170	3L	2517161	2518402	+	811	lincRNA	-	-	68	74	57	32	18	16	4.80713	5.22064	4.09762	2.29829	1.30516	1.17525
FBgn0033302	104.317	156.779	114.659	50.1147	39.5168	29.1788	125.252	39.6034	1.66191	7.90742e-10	1.82583e-08	Cyp6a14	2R	8564187	8567202	-	2959	protein_coding	-	p450	103	155	110	51	41	30	1.99567	2.99709	2.16733	1.00392	0.814799	0.603958
FBgn0034711	3852.66	4270.46	4314.31	1287.26	1240.44	1384.05	4145.81	1303.92	1.66879	4.53091e-101	2.23322e-98	CG3290	2R	22206005	22207987	-	1762	protein_coding	-	-	3804	4222	4139	1310	1287	1423	123.775	137.096	136.952	43.3053	42.9521	48.1093
FBgn0029813	34.4349	26.2984	22.9318	4.9132	9.63823	11.6715	27.8884	8.74098	1.67311	0.0013291	0.00989105	CG15766	X	5814864	5815820	-	957	protein_coding	-	Acetyltransf_1	34	26	22	5	10	12	2.03688	1.55444	1.34026	0.304323	0.614469	0.746964
FBgn0032456	19022.2	19074.4	18394.5	5776.94	6154.01	5622.75	18830.4	5851.24	1.68624	3.64793e-161	3.89569e-158	MRP	2L	12719045	12744807	+	7334	protein_coding	-	ABC_membrane	18782	18858	17647	5879	6385	5781	146.824	147.119	140.284	46.6916	51.1955	46.9561
FBgn0034293	135.714	182.066	173.031	44.2188	55.9018	47.6587	163.604	49.2598	1.73108	2.72952e-14	9.60956e-13	CG14495	2R	18048804	18049922	-	1035	protein_coding	-	-	134	180	166	45	58	49	7.4227	9.95051	9.35072	2.53249	3.29533	2.82024
FBgn0015037	4502.87	4489.95	5257.65	1615.46	1379.23	1285.81	4750.15	1426.83	1.73519	4.22678e-77	1.50462e-74	Cyp4p1	2R	9240041	9242139	+	1680	protein_coding	-	p450	4446	4439	5044	1644	1431	1322	151.725	151.178	175.042	56.9992	50.089	46.8762
FBgn0031249	1051.28	1053.96	1387.38	301.671	442.395	296.651	1164.2	346.905	1.74624	2.23583e-33	2.27398e-31	CG11911	2L	320279	321248	-	970	protein_coding	-	Trypsin	1038	1042	1331	307	459	305	61.3512	61.4623	79.9988	18.435	27.8261	18.7309
FBgn0031248	280.543	241.743	266.843	67.8022	103.129	63.2207	263.043	78.0507	1.75198	4.00913e-19	2.14071e-17	CG11912	2L	318362	319259	-	898	protein_coding	-	Trypsin	277	239	256	69	107	65	17.6848	15.2277	16.6204	4.47557	7.00679	4.31188
FBgn0032381	5367.79	5579.31	5200.32	1844.42	1285.74	1663.19	5382.47	1597.78	1.75234	5.44447e-66	1.5857e-63	Mal-B1	2L	11847226	11849169	+	1814	protein_coding	-	-	5300	5516	4989	1877	1334	1710	167.508	173.98	160.344	60.2703	43.2444	56.1551
FBgn0053510	99.2535	98.1133	104.236	26.5313	36.6253	26.2609	100.534	29.8058	1.75314	2.56648e-10	6.38629e-09	CG33510	2L	21082643	21084326	-	1566	protein_coding	-	-	98	97	100	27	38	27	3.58783	3.54399	3.72294	1.00426	1.42693	1.02707
FBgn0033792	2677.82	3314.61	4119.39	1020.96	823.105	1155.48	3370.61	999.849	1.75322	7.35309e-15	2.72341e-13	CG13325	2R	13110769	13126014	+	4040	protein_coding	-	-	2644	3277	3952	1039	854	1188	37.5213	46.4096	57.0313	14.9799	12.4305	17.5172
FBgn0031926	113.433	122.389	155.311	35.3751	30.8423	49.6039	130.377	38.6071	1.75544	1.68517e-11	4.62429e-10	CG6739	2L	7608389	7616533	+	2718	protein_coding	-	Fz	112	121	149	36	32	51	2.36247	2.54712	3.19605	0.771488	0.692329	1.11777
FBgn0053511	53.6779	63.7231	72.965	11.7917	28.9147	14.5894	63.4553	18.4319	1.78125	1.94822e-06	2.8697e-05	CG33511	2L	21081127	21082494	-	1248	protein_coding	-	-	53	63	70	12	30	15	2.43477	2.88828	3.2701	0.56007	1.41357	0.71599
FBgn0033204	1142.43	1267.38	1233.11	378.317	348.904	327.775	1214.31	351.665	1.78797	2.94241e-70	9.42674e-68	CG2065	2R	7663786	7665269	+	1233	protein_coding	-	adh_short	1128	1253	1183	385	362	337	52.4498	58.1435	55.937	18.1875	17.2646	16.2816
FBgn0034317	16.2047	14.1607	44.8213	1.96528	13.4935	5.83576	25.0622	7.09819	1.81538	0.00567686	0.0331875	CG14499	2R	18187707	18188573	+	867	protein_coding	-	-	16	14	43	2	14	6	1.05803	0.923894	2.89152	0.134365	0.949556	0.412252
FBgn0259237	513.485	602.841	619.16	164.101	162.886	165.346	578.495	164.111	1.81749	8.18779e-43	1.11624e-40	CG42335	3R	21758764	21769301	+	2786	protein_coding	-	-	507	596	594	167	169	170	10.4334	12.2399	12.4303	3.49149	3.56712	3.63495
FBgn0035743	81.0233	70.8034	76.092	24.566	19.2765	20.4251	75.9729	21.4225	1.82693	8.6519e-09	1.81463e-07	CG15829	3L	7128903	7129673	+	697	protein_coding	-	-	80	70	73	25	20	21	6.58044	5.74617	6.10615	2.08922	1.68736	1.7948
FBgn0033787	4545.41	5065.48	4856.34	1314.77	1480.43	1278.03	4822.41	1357.75	1.82846	5.25702e-117	3.54572e-114	CG13321	2R	12953112	12955712	+	2043	protein_coding	-	-	4488	5008	4659	1338	1536	1314	125.945	140.252	132.954	38.1473	44.2114	38.314
FBgn0040531	48.614	56.6427	36.4825	4.9132	23.1318	11.6715	47.2464	13.2388	1.83336	6.10676e-05	0.000670018	CG11741	3R	8528423	8528877	-	455	protein_coding	-	-	48	56	35	5	24	12	6.04822	7.0419	4.48471	0.640081	3.10178	1.57109
FBgn0265186	674.519	862.79	663.981	209.302	204.331	198.416	733.763	204.016	1.84685	2.26731e-44	3.2284e-42	CG44251	2R	12948348	12952293	-	1917	protein_coding	-	-	666	853	637	213	212	204	19.9182	25.4589	19.3729	6.47193	6.50318	6.33925
FBgn0037724	1337.9	1996.66	2126.41	471.667	457.816	579.685	1820.32	503.056	1.85537	1.34197e-15	5.27524e-14	Fst	3R	9644978	9646154	-	1177	protein_coding	-	-	1321	1974	2040	480	475	596	64.3463	95.9586	101.049	23.7542	23.7317	30.1648
FBgn0051454	35.4477	34.3902	36.4825	7.86112	12.5297	8.75363	35.4401	9.71482	1.86586	5.73051e-05	0.000634715	CG31454	3R	8521658	8523520	+	1736	protein_coding	-	-	35	34	35	8	13	9	1.15589	1.12058	1.17543	0.268421	0.440357	0.308832
FBgn0005664	940.883	1086.33	942.29	258.434	307.46	239.266	989.833	268.387	1.8827	3.94714e-57	8.87414e-55	Cry	2L	11944129	11947131	+	2261	protein_coding	-	Chitin_bind_4	929	1074	904	263	319	246	23.5566	27.178	23.3102	6.77534	8.29663	6.48134
FBgn0037485	1107.99	1182.42	1145.55	279.07	338.302	314.158	1145.32	310.51	1.88273	2.94441e-73	9.67503e-71	CG14606	3R	7214339	7217083	-	1925	protein_coding	-	Sugar_tr	1094	1169	1099	284	351	323	32.5825	34.7454	33.2847	8.59337	10.7223	9.99544
FBgn0032669	1604.26	1596.11	1417.6	365.542	430.829	444.49	1539.33	413.62	1.89582	8.61953e-78	3.15598e-75	CG15155	2L	18154851	18155942	+	909	protein_coding	-	-	1584	1578	1360	372	447	457	99.9054	99.3245	87.2273	23.8372	28.9171	29.949
FBgn0038484	268.39	285.237	320.003	85.4897	55.9018	91.4268	291.21	77.6061	1.9083	1.08462e-23	7.51318e-22	CG5246	3R	17136111	17137195	+	1085	protein_coding	-	Trypsin	265	282	307	87	58	94	14.0028	14.8707	16.4963	4.67052	3.14347	5.16093
FBgn0263402	56.7163	34.3902	74.0073	3.93056	20.2403	17.5073	55.0379	13.8927	1.98317	1.50137e-05	0.000189371	CG43448	3R	30237094	30237734	-	529	protein_coding	-	-	56	34	71	4	21	18	6.06918	3.67736	7.82492	0.440433	2.3344	2.02697
FBgn0028945	92.164	97.1018	133.422	20.6355	26.9871	33.0693	107.562	26.8973	1.99843	1.04083e-11	2.94442e-10	CG7631	2L	15628678	15629552	+	813	protein_coding	-	Astacin	91	96	128	21	28	34	6.41724	6.75606	9.17903	1.50454	2.02525	2.49126
FBgn0034187	210.66	257.927	127.167	55.0279	50.1188	40.8503	198.585	48.6657	2.02963	2.47188e-15	9.45585e-14	CG6967	2R	17062775	17066546	+	3474	protein_coding	-	-	208	255	122	56	52	42	3.43266	4.19975	2.04742	0.938932	0.880208	0.720194
FBgn0033788	11046.5	12072	12984.6	2976.42	2768.1	3055.02	12034.4	2933.18	2.03663	2.89296e-160	2.8518e-157	CG13323	2R	13044695	13047256	-	2562	protein_coding	-	-	10907	11935	12457	3029	2872	3141	244.075	266.536	283.473	68.8646	65.92	73.033
FBgn0085456	28.3581	25.2869	19.8048	0.982641	10.6021	5.83576	24.4833	5.80682	2.07273	0.000866378	0.0068857	CG34427	3L	8804764	8805812	+	865	protein_coding	-	-	28	25	19	1	11	6	1.85584	1.65362	1.2806	0.067338	0.747805	0.413205
FBgn0032668	62.793	92.0444	58.372	5.89584	20.2403	24.3157	71.0698	16.8173	2.07796	1.60851e-07	2.82757e-06	CG17681	2L	18153123	18154516	+	1282	protein_coding	-	-	62	91	56	6	21	25	2.77269	4.06131	2.5467	0.272608	0.963259	1.16167
FBgn0040262	109.381	151.722	140.718	15.7222	43.3721	31.124	133.94	30.0728	2.15312	2.85754e-13	9.29426e-12	Ugt36Ba	2L	16794211	16796009	+	1799	protein_coding	-	UDPGT	108	150	135	16	45	32	3.44184	4.7706	4.37502	0.518042	1.47093	1.05962
FBgn0040601	52.6651	52.5968	74.0073	10.809	19.2765	9.72626	59.7564	13.2706	2.16868	4.30073e-08	8.23825e-07	CG13643	3R	24897685	24906004	-	3284	protein_coding	-	CBM_14	52	52	71	11	20	10	0.907816	0.905969	1.26047	0.195104	0.358128	0.181396
FBgn0000565	4590.98	4482.87	5144.03	865.706	1214.42	1037.79	4739.29	1039.31	2.18883	4.04111e-101	2.07147e-98	Eip71CD	3L	15511052	15513202	+	1354	protein_coding	-	PMSR	4533	4432	4935	881	1260	1067	191.94	187.281	212.494	37.8995	54.7222	46.9435
FBgn0264775	534.754	590.703	610.821	99.2467	132.044	148.812	578.759	126.701	2.19092	1.84202e-49	3.10598e-47	CG44013	3R	15508896	15509917	-	940	protein_coding	-	-	528	584	586	101	137	153	32.2035	35.5466	36.3452	6.25849	8.57047	9.69602
FBgn0036589	535.766	691.851	925.613	168.032	147.465	147.839	717.743	154.445	2.21623	2.04069e-39	2.44406e-37	CG13067	3L	16271282	16271918	+	564	protein_coding	-	-	529	684	888	171	153	152	53.7742	69.3889	91.7933	17.6601	15.9523	16.0544
FBgn0052037	32.4093	50.5739	29.186	6.87848	5.78294	10.6989	37.3897	7.78677	2.26452	6.1384e-06	8.31539e-05	CG32037	3L	9489502	9492215	-	1836	protein_coding	-	-	32	50	28	7	6	11	0.999251	1.55815	0.889125	0.222076	0.192172	0.356903
FBgn0040251	28.3581	38.4361	18.7624	4.9132	7.71059	4.86313	28.5189	5.82897	2.29044	6.21419e-05	0.000678321	Ugt86Di	3R	11151026	11153849	-	2556	protein_coding	-	UDPGT	28	38	18	5	8	5	0.628051	0.85062	0.410572	0.113942	0.184052	0.11653
FBgn0036363	28.3581	23.264	19.8048	3.93056	5.78294	4.86313	23.809	4.85888	2.29231	0.000153286	0.0015204	CG10140	3L	13439317	13440470	-	969	protein_coding	-	CBM_14	28	23	19	4	6	5	1.65665	1.35805	1.14316	0.240443	0.364116	0.307381
FBgn0038731	1312.58	1282.55	1341.51	250.573	260.232	273.308	1312.21	261.371	2.32771	3.0734e-121	2.3168e-118	CG11659	3R	19775459	19777280	-	1705	protein_coding	-	AMP-binding	1296	1268	1287	255	270	281	43.5791	42.5508	44.008	8.71148	9.31217	9.81775
FBgn0053509	476.012	539.117	571.211	96.2988	100.238	114.77	528.78	103.769	2.34902	9.16449e-57	1.99056e-54	CG33509	2L	21084605	21086506	-	1405	protein_coding	-	-	470	533	548	98	104	118	19.1787	21.7052	22.7395	4.0628	4.3528	5.00306
FBgn0263080	189.392	181.054	200.132	34.3924	35.6615	37.9324	190.193	35.9954	2.40131	8.43601e-27	6.71475e-25	CG43348	2L	1199412	1199924	+	513	protein_coding	-	-	187	179	192	35	37	39	20.8988	19.9641	21.8203	3.97399	4.24127	4.52874
FBgn0063497	9618.47	10662	10398.5	1673.44	2134.87	1990.97	10226.3	1933.09	2.4032	4.25666e-172	5.4549e-169	GstE3	2R	18400713	18401467	+	755	protein_coding	-	GST_C	9497	10541	9976	1703	2215	2047	721.169	798.818	770.348	131.384	172.52	161.511
FBgn0033215	970.254	944.72	997.535	225.025	144.574	166.319	970.836	178.639	2.44291	2.77386e-75	9.60729e-73	CG1942	2R	7712578	7714182	+	1305	protein_coding	-	-	958	934	957	229	150	171	42.0874	40.9496	42.7542	10.2212	6.75916	7.80577
FBgn0038730	360.554	390.43	491.992	53.0626	95.4185	78.7827	414.325	75.7546	2.44999	1.7284e-37	1.99544e-35	CG6300	3R	19771382	19773225	-	1724	protein_coding	-	AMP-binding	356	386	472	54	99	81	11.8389	12.8104	15.9618	1.82445	3.37683	2.79884
FBgn0036411	45.5756	53.6083	53.1602	8.84376	8.67441	9.72626	50.7814	9.08148	2.4832	6.85851e-09	1.45276e-07	Sox21a	3L	14103481	14108118	-	2335	protein_coding	-	HMG_box	45	53	51	9	9	10	1.1049	1.29868	1.27339	0.224508	0.226656	0.255119
FBgn0034047	26.3326	23.264	11.4659	2.94792	0	7.78101	20.3542	3.57631	2.51164	0.000867873	0.00689083	CG12970	2R	15855961	15857522	+	1137	protein_coding	-	-	26	23	11	3	0	8	1.31102	1.15739	0.56404	0.153687	0	0.419141
FBgn0013772	3908.36	4697.3	5177.38	688.831	772.023	923.022	4594.35	794.625	2.5314	4.93778e-116	2.87626e-113	Cyp6a8	2R	14887171	14889010	-	1781	protein_coding	-	p450	3859	4644	4967	701	801	949	124.225	149.191	162.595	22.9261	26.4472	31.7419
FBgn0036362	1461.46	1464.62	1474.93	311.497	232.281	202.306	1467	248.695	2.5609	1.70609e-97	7.80839e-95	CG10725	3L	13437954	13439009	+	876	protein_coding	-	CBM_14	1443	1448	1415	317	241	208	94.4408	94.5753	94.1737	21.0781	16.178	14.1446
FBgn0261675	1393.6	1096.44	1925.23	236.816	340.23	167.292	1471.76	248.113	2.56837	6.81756e-12	1.96773e-10	Npc1b	X	20934869	20939503	+	3971	protein_coding	-	-	1376	1084	1847	241	353	172	19.8663	15.6186	27.1172	3.53503	5.22741	2.58023
FBgn0037562	123.56	175.997	205.344	34.3924	22.1679	28.2062	168.301	28.2555	2.57499	2.84126e-21	1.74214e-19	CG11671	3R	8287876	8288613	+	681	protein_coding	-	-	122	174	197	35	23	29	10.2709	14.6189	16.8654	2.99362	1.98606	2.53677
FBgn0034296	7238.42	8800.86	7384.05	1170.32	1460.19	1276.09	7807.78	1302.2	2.58386	2.54554e-166	2.96555e-163	CG10912	2R	18056064	18057065	-	910	protein_coding	-	-	7147	8701	7084	1191	1515	1312	450.277	547.067	453.852	76.2336	97.9001	85.886
FBgn0030929	3398.93	4266.41	4712.49	658.369	606.245	671.112	4125.94	645.242	2.67681	4.17282e-140	3.56498e-137	CG15043	X	18493193	18494168	-	903	protein_coding	-	-	3356	4218	4521	670	629	690	213.075	267.259	291.893	43.2178	40.9614	45.5189
FBgn0038082	2480.32	2860.46	2466.22	290.862	492.514	417.257	2602.33	400.211	2.70083	3.37287e-34	3.5429e-32	CG5724	3R	12739642	12741417	+	1710	protein_coding	-	UDPGT	2449	2828	2366	296	511	429	82.1089	94.6229	80.667	10.0826	17.5726	14.9448
FBgn0020880	65.8314	42.4821	78.1767	7.86112	12.5297	7.78101	62.1634	9.39061	2.72475	2.10724e-10	5.29497e-09	CG7179	2L	7775804	7778029	-	2226	protein_coding	-	CUB	65	42	75	8	13	8	1.67412	1.07954	1.96433	0.209335	0.343423	0.214089
FBgn0031801	9344.01	8790.75	9089.35	1259.75	1414.89	1429.76	9074.7	1368.13	2.72955	0	0	CG9498	2L	6349393	6351034	-	1514	protein_coding	-	-	9226	8691	8720	1282	1468	1470	349.37	328.441	335.79	49.3217	57.018	57.8391
FBgn0031033	300.799	421.786	457.595	70.7501	55.9018	44.7408	393.393	57.1309	2.78396	1.17724e-42	1.58803e-40	CG14219	X	19587348	19590170	-	2308	protein_coding	-	-	297	417	439	72	58	46	7.37765	10.3374	11.0893	1.81707	1.47776	1.18728
FBgn0036948	182.302	225.559	124.04	24.566	26.9871	22.3704	177.301	24.6412	2.84745	2.99037e-24	2.12898e-22	CG7298	3L	20202070	20203687	-	1323	protein_coding	-	CBM_14	180	223	119	25	28	23	7.80028	9.64402	5.24402	1.10067	1.24454	1.03561
FBgn0039470	39.4988	23.264	63.5837	9.82641	3.85529	3.8905	42.1155	5.8574	2.84758	3.16627e-07	5.30231e-06	CG6296	3R	27003236	27005469	-	2127	protein_coding	-	Lipase	39	23	61	10	4	4	1.05122	0.61869	1.67201	0.273847	0.110587	0.112027
FBgn0042173	5.06395	50.5739	9.38121	2.94792	1.92765	3.8905	21.673	2.92202	2.89268	0.000725589	0.00591879	CG18853	2R	7829062	7830429	+	1157	protein_coding	-	-	5	50	9	3	2	4	0.247762	2.47258	0.45351	0.15103	0.10165	0.205948
FBgn0266279	21.2686	24.2755	19.8048	1.96528	3.85529	2.91788	21.7829	2.91282	2.90099	3.63264e-05	0.000422925	CR44964	X	6746399	6748020	-	1556	lincRNA	-	-	21	24	19	2	4	3	0.773762	0.8825	0.711904	0.074868	0.151169	0.114853
FBgn0010038	388.912	370.201	327.3	32.4271	70.3591	36.9598	362.137	46.582	2.95701	3.96998e-43	5.47046e-41	GstD2	3R	12371971	12372704	+	734	protein_coding	-	GST_N	384	366	314	33	73	38	29.9939	28.5298	24.9408	2.61875	5.84842	3.08402
FBgn0040261	49.6268	53.6083	63.5837	4.9132	9.63823	6.80838	55.6063	7.11994	2.96287	6.21085e-11	1.63433e-09	Ugt36Bb	2L	16796595	16798273	+	1620	protein_coding	-	UDPGT	49	53	61	5	10	7	1.73412	1.87186	2.19529	0.179776	0.362992	0.257403
FBgn0051272	2958.36	3274.15	2845.63	355.716	383.602	419.202	3026.05	386.173	2.97005	1.26909e-223	2.32334e-220	CG31272	3R	10756296	10759398	-	2102	protein_coding	-	MFS_1	2921	3237	2730	362	398	431	79.6703	88.1096	75.7194	10.0312	11.1343	12.2145
FBgn0031034	564.125	1083.29	1086.14	129.709	139.754	73.9196	911.184	114.461	2.99284	1.61228e-13	5.38058e-12	CG14205	X	19592609	19595548	+	2338	protein_coding	-	-	557	1071	1042	132	145	76	13.6587	26.2095	25.9837	3.28856	3.647	1.93642
FBgn0034289	6903.18	8299.17	8371.17	935.474	822.141	984.298	7857.84	913.971	3.10398	5.4407e-253	1.39445e-249	CG10910	2R	18020268	18022406	+	1991	protein_coding	-	-	6816	8205	8031	952	853	1012	196.271	235.787	235.167	27.8511	25.1936	30.2789
FBgn0038973	6710.75	6194.29	5976.87	604.324	789.371	694.455	6293.97	696.05	3.17647	1.73949e-266	5.57288e-263	Pebp1	3R	22466034	22466679	+	646	protein_coding	-	-	6626	6124	5734	615	819	714	588.053	542.395	517.491	55.4522	74.5527	65.8409
FBgn0004431	266.364	314.569	283.521	30.4619	30.8423	26.2609	288.151	29.1884	3.30339	2.52048e-51	4.36485e-49	LysX	3L	1194739	1195302	-	564	protein_coding	-	-	263	311	272	31	32	27	26.7346	31.5496	28.1169	3.20154	3.33643	2.85177
FBgn0053542	32.4093	43.4935	35.4401	6.87848	1.92765	1.94525	37.1143	3.58379	3.37716	2.66694e-08	5.28235e-07	upd3	X	18277233	18284596	+	2221	protein_coding	-	-	32	43	34	7	2	2	0.826036	1.10773	0.892499	0.18358	0.0529533	0.0536428
FBgn0028519	76.9721	47.5394	66.7108	8.84376	2.89147	5.83576	63.7408	5.857	3.44712	5.65653e-13	1.79427e-11	CG4500	2L	14027001	14029368	+	2206	protein_coding	-	AMP-binding	76	47	64	9	3	6	1.97517	1.219	1.69142	0.237636	0.0799701	0.162023
FBgn0010043	399.04	364.132	417.985	31.4445	37.5891	38.905	393.719	35.9795	3.45121	8.24073e-70	2.57573e-67	GstD7	3R	12378500	12379255	+	756	protein_coding	-	GST_N	394	360	401	32	39	40	29.8794	27.2454	30.9243	2.4655	3.03357	3.15187
FBgn0036951	32.4093	30.3443	13.5506	5.89584	0.963823	0	25.4348	2.28656	3.48343	1.06e-05	0.000138188	CG7017	3L	20210292	20212122	-	1560	protein_coding	-	CBM_14	32	30	13	6	1	0	1.17604	1.1003	0.485843	0.224028	0.0376953	0
FBgn0022700	2083.31	2225.25	2417.22	223.059	181.199	177.991	2241.93	194.083	3.53039	2.28302e-233	4.87616e-230	Cht4	2R	21065379	21067087	-	1473	protein_coding	-	CBM_14	2057	2200	2319	227	188	183	80.0625	85.4541	91.7858	8.97634	7.50528	7.4008
FBgn0052198	13.1663	27.3099	30.2283	2.94792	1.92765	0.972626	23.5682	1.9494	3.59689	6.77635e-06	9.12174e-05	CG32198	3L	18526976	18527445	+	470	protein_coding	-	-	13	27	29	3	2	1	1.58578	3.28684	3.59731	0.371791	0.250233	0.126745
FBgn0003961	6074.72	6097.19	6266.65	424.501	528.175	542.725	6146.18	498.467	3.62381	0	0	Uro	2L	7780085	7781415	+	1262	protein_coding	-	-	5998	6028	6012	432	548	558	272.486	273.292	277.739	19.9389	25.5348	26.3393
FBgn0031412	358.528	322.661	308.538	19.6528	19.2765	37.9324	329.909	25.6206	3.68678	4.88601e-57	1.07956e-54	CG16995	2L	2307948	2308872	+	721	protein_coding	-	SCP	354	319	296	20	20	39	28.1492	25.3145	23.935	1.61574	1.6312	3.22225
FBgn0033789	1209.27	2069.48	1971.1	69.7675	172.524	133.25	1749.95	125.181	3.80501	1.07903e-18	5.57571e-17	CG13324	2R	13049146	13049656	-	511	protein_coding	-	-	1194	2046	1891	71	179	137	133.962	229.086	215.749	8.09307	20.5989	15.9709
FBgn0034160	438.538	678.701	798.445	40.2883	29.8785	31.124	638.562	33.7636	4.24188	1.36582e-79	5.14795e-77	CG5550	2R	16816589	16817577	+	938	protein_coding	-	Fibrinogen_C	433	671	766	41	31	32	26.4656	40.9292	47.6106	2.54599	1.94344	2.03225
FBgn0035176	9445.29	10893.6	7966.73	580.741	516.609	322.912	9435.21	473.421	4.31689	1.66468e-58	4.02508e-56	CG13905	3L	902898	903810	+	913	protein_coding	-	-	9326	10770	7643	591	536	332	585.628	674.929	488.057	37.7045	34.5228	21.6619
FBgn0085246	180.277	126.435	180.328	11.7917	4.81912	6.80838	162.346	7.8064	4.3813	6.18346e-32	5.78402e-30	CG34217	2R	8227990	8228727	-	738	protein_coding	-	-	178	125	173	12	5	7	13.8281	9.69096	13.6668	0.947111	0.398406	0.56503
FBgn0033981	13996.8	13613.5	15271.6	474.615	513.718	564.123	14293.9	517.485	4.7876	0	0	Cyp6a21	2R	14885264	14886947	-	1631	protein_coding	-	p450	13820	13459	14651	483	533	580	485.793	472.141	523.71	17.2492	19.217	21.1838
FBgn0052302	15.1919	29.3328	29.186	0	0.963823	0.972626	24.5702	0.645483	5.24366	5.48262e-06	7.49038e-05	CG32302	3L	2268825	2269903	+	1079	protein_coding	-	CBM_14	15	29	28	0	1	1	0.797016	1.53776	1.51291	0	0.0544992	0.0552088
FBgn0053983	35.4477	29.3328	43.779	0	0.963823	0.972626	36.1865	0.645483	5.80183	1.7116e-07	3.00058e-06	obst-H	3L	15528265	15529243	-	915	protein_coding	-	CBM_14	35	29	42	0	1	1	2.19303	1.81338	2.67612	0	0.0642674	0.0651042
FBgn0039091	425.372	383.35	573.296	5.89584	3.85529	6.80838	460.673	5.51984	6.3841	3.61904e-61	9.66209e-59	CG10182	3R	23587120	23589819	-	2212	protein_coding	-	-	420	379	550	6	4	7	10.8858	9.80318	14.4962	0.157995	0.106338	0.188514
FBgn0031654	4.05116	2.02295	3.12707	157.222	263.124	336.529	3.06706	252.292	-6.36271	2.10391e-32	1.99716e-30	Jon25Bii	2L	4952243	4953136	-	894	protein_coding	-	Trypsin	4	2	3	160	273	346	0.256519	0.127999	0.195642	10.4246	17.9571	23.0552
FBgn0043576	2.02558	1.01148	4.16943	72.7154	88.6717	27.2335	2.40216	62.8736	-4.71847	5.25832e-12	1.52801e-10	PGRP-SC1a	2R	8709733	8710320	+	588	protein_coding	-	-	2	1	4	74	92	28	0.195007	0.0973051	0.396607	7.33045	9.20073	2.83668
FBgn0051091	28.3581	8.09182	17.7201	400.917	423.118	497.012	18.0567	440.349	-4.60814	2.88916e-74	9.74331e-72	CG31091	3R	25899903	25902172	+	2149	protein_coding	-	-	28	8	17	408	439	511	0.746997	0.212994	0.461201	11.0586	12.0127	14.1649
FBgn0039471	5.06395	0	0	48.1494	39.5168	29.1788	1.68798	38.9483	-4.51727	9.23708e-09	1.93105e-07	CG6295	3R	27005899	27007055	-	1091	protein_coding	-	Lipase	5	0	0	49	41	30	0.26275	0	0	2.61606	2.20989	1.63805
FBgn0020906	39.4988	16.1836	7.2965	344.907	464.563	527.163	20.993	445.544	-4.40623	4.93537e-12	1.4407e-10	Jon25Bi	2L	4954279	4955144	-	866	protein_coding	-	Trypsin	39	16	7	351	482	542	2.58193	1.0571	0.471257	23.6083	32.7296	37.2831
FBgn0039666	9.11512	12.1377	9.38121	339.994	108.912	112.825	10.2114	187.243	-4.19619	8.39833e-11	2.19347e-09	Diedel	3R	29493852	29494267	+	416	protein_coding	-	-	9	12	9	346	113	116	1.24036	1.65044	1.26132	48.4461	15.9734	16.611
FBgn0020506	8.10233	12.1377	13.5506	105.143	159.031	115.742	11.2636	126.639	-3.49322	2.88571e-23	1.93615e-21	Amyrel	2R	16651095	16652699	-	1549	protein_coding	-	-	8	12	13	107	165	119	0.296098	0.443244	0.489293	4.02354	6.26389	4.57642
FBgn0039472	5.06395	0	5.21178	35.3751	26.9871	42.7955	3.42525	35.0526	-3.3605	1.53744e-07	2.71382e-06	CG17192	3R	27017180	27018287	-	1052	protein_coding	-	Lipase	5	0	5	36	28	44	0.272491	0	0.277097	1.99325	1.56514	2.49154
FBgn0037996	6.07675	0	1.04236	20.6355	22.1679	30.1514	2.37303	24.3183	-3.35242	1.45423e-05	0.000183786	CG4830	3R	12208159	12210360	-	1861	protein_coding	-	AMP-binding	6	0	1	21	23	31	0.184843	0	0.0313279	0.657278	0.726764	0.992306
FBgn0051267	33.4221	36.4132	27.1013	283.983	306.496	273.308	32.3122	287.929	-3.15409	9.97171e-49	1.59734e-46	CG31267	3R	17134197	17135283	+	921	protein_coding	-	Trypsin	33	36	26	289	318	281	2.05424	2.23643	1.64585	18.2774	20.3039	18.1751
FBgn0004426	3.03837	26.2984	2.08471	83.5244	35.6615	157.565	10.4738	92.2504	-3.13759	0.00703907	0.0392711	LysC	3L	1210485	1210971	+	487	protein_coding	-	-	3	26	2	85	37	162	0.353175	3.05462	0.23943	10.1664	4.46771	19.816
FBgn0033720	12.1535	2.02295	1.04236	29.4792	54.9379	41.8229	5.07293	42.08	-3.04646	3.08841e-07	5.19395e-06	CG13160	2R	12371594	12375081	+	2736	protein_coding	-	-	12	2	1	30	57	43	0.251456	0.0418241	0.0213089	0.638677	1.2251	0.93623
FBgn0051562	2.02558	5.05739	2.08471	20.6355	30.8423	19.4525	3.05589	23.6434	-2.94896	2.60395e-05	0.000313624	CR31562	3R	6184455	6185629	+	1175	pseudogene	-	-	2	5	2	21	32	20	0.0975865	0.24347	0.099236	1.04102	1.60149	1.01396
FBgn0011556	62.793	31.3558	82.3462	468.72	406.733	415.311	58.8317	430.255	-2.87307	2.73651e-43	3.81178e-41	zetaTry	2R	11339186	11340132	-	947	protein_coding	-	Trypsin	62	31	79	477	422	427	3.75352	1.87294	4.86356	29.3389	26.2044	26.8601
FBgn0052379	14.1791	5.05739	15.6353	83.5244	97.3462	72.947	11.6239	84.6059	-2.86695	4.8894e-14	1.68889e-12	CG32379	3L	7396355	7398208	+	1238	protein_coding	-	-	14	5	15	85	101	75	0.648343	0.23108	0.706396	3.99921	4.79747	3.60887
FBgn0003358	793.015	635.208	805.742	5073.37	5422.47	5696.67	744.655	5397.5	-2.85792	2.26054e-216	3.62111e-213	Jon99Ci	3R	29925226	29926189	-	907	protein_coding	-	Trypsin	783	628	773	5163	5626	5857	49.4939	39.6155	49.6878	331.567	364.757	384.679
FBgn0010388	22.2814	4.04591	2.08471	70.7501	27.9509	92.3995	9.47067	63.7002	-2.74827	0.00695457	0.0388843	Dro	2R	14745961	14746714	+	754	protein_coding	-	-	22	4	2	72	29	95	1.67282	0.30353	0.154645	5.56208	2.26172	7.50555
FBgn0032282	3.03837	2.02295	6.25414	20.6355	29.8785	18.4799	3.77182	22.998	-2.61435	9.94068e-05	0.00103484	CG7299	2L	10683427	10684409	-	983	protein_coding	-	-	3	2	6	21	31	19	0.174971	0.11641	0.355857	1.24435	1.85447	1.15141
FBgn0035667	74.9465	80.9182	69.8379	441.206	402.878	498.957	75.2342	447.68	-2.57239	7.41239e-55	1.46138e-52	Jon65Ai	3L	6053493	6054443	-	951	protein_coding	-	Trypsin	74	80	67	449	418	513	4.46117	4.81307	4.10744	27.5006	25.8468	32.1342
FBgn0031653	826.437	608.909	809.911	3941.37	4380.58	4816.44	748.419	4379.46	-2.54905	1.9571e-126	1.56751e-123	Jon25Biii	2L	4949941	4950767	-	827	protein_coding	-	Trypsin	816	602	777	4011	4545	4952	56.5695	41.649	54.7763	282.503	323.177	356.702
FBgn0033327	9.11512	11.1263	10.4236	82.5418	73.2506	22.3704	10.2216	59.3876	-2.53852	1.6062e-07	2.82739e-06	PGRP-SC1b	2R	8713446	8715094	+	1649	protein_coding	-	-	9	11	10	84	76	23	0.31291	0.381667	0.353555	2.96712	2.71022	0.830878
FBgn0052282	8.10233	12.1377	27.1013	108.09	80.9612	84.6185	15.7804	91.2234	-2.53635	4.08883e-12	1.2018e-10	Drsl4	3L	3315620	3315942	+	323	protein_coding	-	-	8	12	26	110	84	87	1.41999	2.12565	4.69297	19.8366	15.2929	16.0453
FBgn0035666	21.2686	17.1951	23.9742	188.667	59.757	101.153	20.8126	116.526	-2.48548	3.08813e-11	8.31394e-10	Jon65Aii	3L	6052321	6053215	+	833	protein_coding	-	Trypsin	21	17	23	192	62	104	1.44535	1.16766	1.60976	13.4256	4.37682	7.43735
FBgn0001285	153.944	144.641	182.412	859.81	909.849	875.363	160.333	881.674	-2.46016	9.45607e-91	4.1786e-88	Jon44E	2R	8691448	8692844	+	1397	protein_coding	-	Trypsin	152	143	175	875	944	900	6.23799	5.8567	7.3033	36.4828	39.7363	38.3775
FBgn0030981	17.2174	14.1607	12.5083	59.9411	51.0826	124.496	14.6288	78.5066	-2.42301	2.04319e-09	4.49889e-08	CG14191	X	19081665	19082566	+	787	protein_coding	-	-	17	14	12	61	53	128	1.23843	1.01781	0.888963	4.51472	3.96016	9.6887
FBgn0085356	8.10233	12.1377	5.21178	56.9932	27.9509	50.5766	8.48395	45.1735	-2.40908	7.20078e-07	1.13643e-05	CG34327	X	17222968	17223815	-	848	protein_coding	-	-	8	12	5	58	29	52	0.540868	0.809652	0.343757	3.9839	2.01101	3.6529
FBgn0039685	267.377	210.387	150.099	1152.64	1008.16	1066	209.288	1075.6	-2.36042	1.08652e-59	2.73014e-57	Obp99b	3R	29716254	29716896	-	594	protein_coding	-	-	264	208	144	1173	1046	1096	25.4809	20.035	14.1336	115.024	103.552	109.914
FBgn0266702	41.5244	43.4935	52.1178	207.337	254.449	239.266	45.7119	233.684	-2.35517	2.81261e-29	2.41903e-27	CR45192	3R	5835478	5836178	-	649	lincRNA	-	-	41	43	50	211	264	246	3.6219	3.79085	4.49162	18.9371	23.9205	22.5798
FBgn0267145	21.2686	10.1148	11.4659	69.7675	60.7209	78.7827	14.2831	69.757	-2.28652	1.008e-09	2.28629e-08	CR45585	3R	5015624	5021474	+	753	lincRNA	-	-	21	10	11	71	63	81	1.5989	0.759833	0.851677	5.49211	4.91991	6.40797
FBgn0033353	9.11512	12.1377	11.4659	60.9237	39.5168	52.5218	10.9063	50.9874	-2.22494	1.38275e-07	2.45429e-06	CG13749	2R	8933423	8934445	+	897	protein_coding	-	-	9	12	11	62	41	54	0.575238	0.765424	0.714953	4.02601	2.68784	3.58617
FBgn0003356	4946.47	3997.36	4082.91	20922.4	18256.7	19816.3	4342.25	19665.1	-2.17909	3.3172e-144	3.03642e-141	Jon99Cii	3R	29923754	29924615	-	862	protein_coding	-	Trypsin	4884	3952	3917	21292	18942	20374	324.837	262.315	264.925	1438.75	1292.2	1407.99
FBgn0028948	0	6.06886	7.2965	16.7049	22.1679	20.4251	4.45512	19.766	-2.15418	0.00212255	0.0147268	CG15253	2L	15615357	15616351	-	942	protein_coding	-	Astacin	0	6	7	17	23	21	0	0.364429	0.433236	1.05117	1.43578	1.328
FBgn0039475	226.865	155.768	189.709	671.143	892.5	917.186	190.781	826.943	-2.11599	7.78087e-46	1.14611e-43	CG6277	3R	27022071	27023217	-	1085	protein_coding	-	Lipase	224	154	182	683	926	943	11.8363	8.1209	9.77955	36.6663	50.1872	51.774
FBgn0085256	35.4477	31.3558	78.1767	269.244	170.597	183.826	48.3267	207.889	-2.1076	3.88989e-14	1.35459e-12	CG34227	2R	11248126	11248610	+	485	protein_coding	-	-	35	31	75	274	177	189	4.13736	3.65707	9.01565	32.9067	21.4607	23.214
FBgn0029639	5.06395	20.2295	14.593	61.9064	42.4082	67.1112	13.2955	57.1419	-2.10384	8.23088e-07	1.29105e-05	CG14419	X	2885186	2885914	-	729	protein_coding	-	-	5	20	14	63	44	69	0.393224	1.5697	1.11964	5.03372	3.54925	5.63835
FBgn0033097	6.07675	7.08034	21.8895	58.9584	47.2273	43.7682	11.6822	49.9846	-2.10289	3.91704e-06	5.45857e-05	Zip42C.2	2R	6718196	6719533	-	1278	protein_coding	-	-	6	7	21	60	49	45	0.269165	0.313386	0.958001	2.73462	2.25464	2.09755
FBgn0262854	10.1279	14.1607	8.33885	34.3924	49.155	53.4944	10.8758	45.6806	-2.06895	2.34663e-06	3.40979e-05	CG43218	3L	21258020	21258758	+	682	protein_coding	-	CBM_14	10	14	8	35	51	55	0.840646	1.17451	0.683885	2.98923	4.39742	4.80406
FBgn0050043	42.5372	41.4706	43.779	187.684	155.176	186.744	42.5956	176.535	-2.05122	6.1173e-20	3.45344e-18	CG30043	2R	12359436	12363165	+	3082	protein_coding	-	-	42	41	42	191	161	192	0.781293	0.76114	0.7945	3.60975	3.07189	3.71107
FBgn0038479	0	8.09182	6.25414	14.7396	18.3126	26.2609	4.78199	19.7711	-2.04973	0.00372273	0.0234662	CG17477	3R	17126088	17126938	-	851	protein_coding	-	Trypsin	0	8	6	15	19	27	0	0.537865	0.411054	1.02669	1.31291	1.89001
FBgn0039778	313.965	241.743	242.869	1080.9	1050.57	1164.23	266.192	1098.57	-2.04468	2.59921e-69	7.93069e-67	Jon99Fi	3R	30488963	30489895	+	933	protein_coding	-	Trypsin	310	239	233	1100	1090	1197	19.0492	14.6565	14.5597	68.6732	68.7	76.4263
FBgn0003357	4171.69	3797.09	3834.83	16799.2	15073.2	16008.5	3934.53	15960.3	-2.02019	3.94897e-188	5.6229e-185	Jon99Ciii	3R	29922216	29923455	+	1240	protein_coding	-	Trypsin	4119	3754	3679	17096	15639	16459	190.444	173.215	172.976	803.062	741.65	790.7
FBgn0002562	23.2942	22.2525	12.5083	86.4724	79.0335	56.4123	19.3517	73.9727	-1.932	3.34927e-08	6.53286e-07	Lsp1alpha	X	12490291	12492982	+	2625	protein_coding	-	-	23	22	12	88	82	58	0.502338	0.47952	0.26652	1.95267	1.83695	1.31622
FBgn0033047	466.897	474.383	454.467	1674.42	1816.81	1736.14	465.249	1742.45	-1.90498	1.09757e-103	6.11537e-101	CG7882	2R	5957621	5960183	+	2266	protein_coding	-	Sugar_tr	461	469	436	1704	1885	1785	11.6638	11.842	11.2177	43.8012	48.9174	46.9255
FBgn0033446	4031.92	4129.86	4399.79	17237.5	13847.3	15244.9	4187.19	15443.2	-1.88294	6.89152e-119	4.90638e-116	CG1648	2R	9810974	9820053	-	1443	protein_coding	-	-	3981	4083	4221	17542	14367	15674	158.17	161.892	170.54	708.091	585.479	647.059
FBgn0043575	118.497	89.01	119.871	475.598	452.033	257.746	109.126	395.126	-1.85669	3.25411e-19	1.76701e-17	PGRP-SC2	2R	8716950	8717695	+	746	protein_coding	-	-	117	88	115	484	469	265	8.99176	6.74927	8.98745	37.7905	36.9697	21.161
FBgn0044812	982.407	1424.16	1918.98	7179.17	4122.27	4299.98	1441.85	5200.47	-1.85075	1.56454e-06	2.34773e-05	TotC	3R	20872988	20873580	+	530	protein_coding	-	-	970	1408	1841	7306	4277	4421	104.928	151.999	202.514	802.934	474.543	496.907
FBgn0033774	2655.54	3204.36	2503.74	10211.6	7708.66	12106.3	2787.88	10008.8	-1.84402	6.19495e-18	3.00713e-16	CG12374	2R	12762113	12763825	+	1464	protein_coding	-	-	2622	3168	2402	10392	7998	12447	102.681	123.81	95.6553	413.461	321.257	506.47
FBgn0028949	19.243	18.2066	34.3978	69.7675	84.8165	100.18	23.9491	84.9215	-1.82919	2.06102e-08	4.1463e-07	CG15254	2L	15613905	15614828	-	868	protein_coding	-	Astacin	19	18	33	71	88	103	1.25496	1.18649	2.21652	4.76447	5.96176	7.06883
FBgn0043791	47.6012	24.2755	79.2191	197.511	137.827	187.717	50.3652	174.351	-1.79383	4.96203e-10	1.17539e-08	CG8147	3R	9494801	9496723	+	1862	protein_coding	-	-	47	24	76	201	143	193	1.44716	0.73747	2.37964	6.28771	4.51615	6.17458
FBgn0031701	589.444	657.46	676.489	3380.28	1708.86	1443.38	641.131	2177.51	-1.76398	5.07215e-06	6.9742e-05	TotM	2L	5329857	5330464	+	552	protein_coding	-	-	582	650	649	3440	1773	1484	60.4479	67.3732	68.5461	362.991	188.878	160.149
FBgn0039777	1185.98	1328.07	1126.79	3915.82	3924.69	3762.12	1213.61	3867.54	-1.67192	3.8476e-100	1.82618e-97	Jon99Fii	3R	30487016	30487928	-	913	protein_coding	-	Trypsin	1171	1313	1081	3985	4072	3868	73.5332	82.2824	69.0291	254.234	262.27	252.375
FBgn0041579	44.5628	47.5394	34.3978	108.09	70.3591	217.868	42.1667	132.106	-1.64669	8.55566e-07	1.33545e-05	AttC	2R	13393705	13394667	+	900	protein_coding	-	-	44	47	33	110	73	224	2.8029	2.98792	2.13771	7.11912	4.76971	14.8264
FBgn0034328	85.0744	129.469	94.8544	473.633	240.956	248.02	103.133	320.869	-1.63726	1.53922e-05	0.000193763	IM23	2R	18382704	18383235	-	468	protein_coding	-	-	84	128	91	482	250	255	10.2904	15.6487	11.3363	59.9898	31.4127	32.4582
FBgn0030756	105.33	96.0904	94.8544	334.098	297.821	288.87	98.7583	306.93	-1.63558	2.39268e-23	1.6138e-21	CG9903	X	16539153	16540852	-	1628	protein_coding	-	-	104	95	91	340	309	297	3.66249	3.33874	3.25885	12.1647	11.1613	10.8676
FBgn0038481	151.919	146.664	140.718	437.275	454.925	461.025	146.434	451.075	-1.62292	9.9281e-33	9.86268e-31	CG17475	3R	17129339	17130426	-	1088	protein_coding	-	Trypsin	150	145	135	445	472	474	7.90424	7.62522	7.23406	23.8236	25.5108	25.9525
FBgn0039820	4.05116	15.1722	12.5083	50.1147	18.3126	25.2883	10.5772	31.2385	-1.56243	0.00433715	0.0266446	CG15554	3R	31126149	31127335	+	801	protein_coding	-	-	4	15	12	51	19	26	0.286302	1.07145	0.873426	3.70863	1.39487	1.93362
FBgn0038865	661.352	670.61	733.819	2167.71	2066.44	1834.37	688.594	2022.84	-1.55484	1.9729e-64	5.61839e-62	CG10824	3R	21159238	21161092	-	1855	protein_coding	-	-	653	663	704	2206	2144	1886	20.1821	20.4495	22.1262	69.2688	67.9661	60.5659
FBgn0028853	105.33	78.8952	137.591	293.81	303.604	331.665	107.272	309.693	-1.53101	5.74867e-17	2.58488e-15	CG15263	2L	15285000	15286047	+	1048	protein_coding	-	-	104	78	132	299	315	341	5.68944	4.2584	7.34328	16.6183	17.6751	19.3831
FBgn0039476	15.1919	6.06886	8.33885	17.6875	27.9509	38.905	9.86653	28.1811	-1.51366	0.00449336	0.0274071	CG6271	3R	27024968	27026109	-	1072	protein_coding	-	Lipase	15	6	8	18	29	40	0.802221	0.320236	0.435083	0.978034	1.5908	2.22277
