# Supplementary material for: Auxin exposure disrupts feeding behavior and fatty acid metabolism in adult Drosophila
Source: eLife. 2024 Jan 19;12:RP91953. doi: 10.7554/eLife.91953 (PMC10945601; doi:10.7554/eLife.91953)
Supplement: Figure 4—figure supplement 1—source data 1. [file elife-91953-fig4-figsupp1-data1.xlsx]

## Sheet: Day 0A
Egg Laying Counts - prefeed - 11/30/2022
Oregon-R
0 mM auxin						10 mM auxin
	Bottle 1	Bottle 2	Bottle 3	Bottle 4	Bottle 5		Bottle 1	Bottle 2	Bottle 3	Bottle 4	Bottle 5
Eggs - AM	7	3	0	1	3	Eggs - AM	11	6	6	7	4
Eggs- PM	77	66	105	78	63	Eggs- PM	113	143	83	111	777
#Females	5	5	5	5	5	#Females	5	5	5	5	5
Eggs/Females	16.8	13.8	21	15.8	13.2	Eggs/Females	24.8	29.8	17.8	23.6	156.2
Average	16.12					Average	50.44
Std. Dev.	3.09386					Std. Dev.	59.2755
Std. Error	1.38362					Std. Error	26.5088
VK00040
0 mM auxin						10 mM auxin
	Bottle 1	Bottle 2	Bottle 3	Bottle 4	Bottle 5		Bottle 1	Bottle 2	Bottle 3	Bottle 4	Bottle 5
Eggs - AM	0	17	0	20	13	Eggs - AM	5	6	7	46	1
Eggs- PM	83	76	73	31	44	Eggs- PM	85	67	45	100	53
#Females	5	5	5	5	5	#Females	5	5	5	5	5
Eggs/Females	16.6	18.6	14.6	10.2	11.4	Eggs/Females	18	14.6	10.4	29.2	10.8
Average	14.28					Average	16.6
Std. Dev.	3.50314					Std. Dev.	7.69415
Std. Error	1.56665					Std. Error	3.44093
AID-tub-AID
0 mM auxin						10 mM auxin
	Bottle 1	Bottle 2	Bottle 3	Bottle 4	Bottle 5		Bottle 1	Bottle 2	Bottle 3	Bottle 4	Bottle 5
Eggs - AM	1	3	8	4	12	Eggs - AM	0	0	1	0	1
Eggs- PM	80	79	102	43	38	Eggs- PM	20	32	129	34	25
#Females	5	5	5	5	5	#Females	4	5	5	5	5
Eggs/Females	16.2	16.4	22	9.4	10	Eggs/Females	5	6.4	26	6.8	5.2
Average	14.8					Average	9.88
Std. Dev.	5.20961					Std. Dev.	9.04389
Std. Error	2.32981					Std. Error	4.04455
	F Test	T Test	Different?
Oregon-R	4.42084e-05	0.265316	no
VK00040	0.156644	0.556502	no
AID-tub-AID	0.310581	0.322639	no

## Sheet: Day 0B
Egg Laying Counts - prefeed - 12/01/2022
Oregon-R
0 mM auxin						10 mM auxin
	Bottle 1	Bottle 2	Bottle 3	Bottle 4	Bottle 5		Bottle 1	Bottle 2	Bottle 3	Bottle 4	Bottle 5
Eggs - AM	26	56	68	83	34	Eggs - AM	51	57	47	93	27
Eggs- PM	73	120	151	86	125	Eggs- PM	132	87	67	117	70
#Females	5	5	5	5	5	#Females	5	5	5	5	5
Eggs/Females	19.8	35.2	43.8	33.8	31.8	Eggs/Females	36.6	28.8	22.8	42	19.4
Average	32.88					Average	29.92
Std. Dev.	8.6274					Std. Dev.	9.39638
Std. Error	3.85829					Std. Error	4.20219
VK00040
0 mM auxin						10 mM auxin
	Bottle 1	Bottle 2	Bottle 3	Bottle 4	Bottle 5		Bottle 1	Bottle 2	Bottle 3	Bottle 4	Bottle 5
Eggs - AM	110	80	66	33	104	Eggs - AM	92	30	52	90	109
Eggs- PM	93	62	102	81	68	Eggs- PM	62	77	69	64	54
#Females	5	5	4	5	5	#Females	5	5	5	5	5
Eggs/Females	40.6	28.4	42	22.8	34.4	Eggs/Females	30.8	21.4	24.2	30.8	32.6
Average	33.64					Average	27.96
Std. Dev.	8.12207					Std. Dev.	4.86909
Std. Error	3.6323					Std. Error	2.17752
AID-tub-AID
0 mM auxin						10 mM auxin
	Bottle 1	Bottle 2	Bottle 3	Bottle 4	Bottle 5		Bottle 1	Bottle 2	Bottle 3	Bottle 4	Bottle 5
Eggs - AM	45	38	45	39	73	Eggs - AM	45	43	37	40	51
Eggs- PM	84	97	39	60	16	Eggs- PM	54	78	95	51	19
#Females	5	5	5	5	5	#Females	4	5	5	5	5
Eggs/Females	25.8	27	16.8	19.8	17.8	Eggs/Females	24.75	24.2	26.4	18.2	14
Average	21.44					Average	21.51
Std. Dev.	4.67418					Std. Dev.	5.2202
Std. Error	2.09036					Std. Error	2.33454
	F Test	T Test	Different?
Oregon-R	0.872547	0.617901	no
VK00040	0.345449	0.216682	no
AID-tub-AID	0.835615	0.982725	no

## Sheet: Day 1
Egg Laying Counts - Day 1 - 12/02/2022
Oregon-R
0 mM auxin						10 mM auxin
	Bottle 1	Bottle 2	Bottle 3	Bottle 4	Bottle 5		Bottle 1	Bottle 2	Bottle 3	Bottle 4	Bottle 5
Eggs - AM	49	82	149	93	69	Eggs - AM	49	51	21	118	36
Eggs- PM	79	124	134	106	129	Eggs- PM	152	106	54	120	37
#Females	5	5	5	5	5	#Females	5	5	5	5	5
Eggs/Females	25.6	41.2	56.6	39.8	39.6	Eggs/Females	40.2	31.4	15	47.6	14.6
Average	40.56					Average	29.76
Std. Dev.	10.9885					Std. Dev.	14.8124
Std. Error	4.91422					Std. Error	6.62432
VK00040
0 mM auxin						10 mM auxin
	Bottle 1	Bottle 2	Bottle 3	Bottle 4	Bottle 5		Bottle 1	Bottle 2	Bottle 3	Bottle 4	Bottle 5
Eggs - AM	28	40	21	7	55	Eggs - AM	122	14	30	74	77
Eggs- PM	83	28	83	63	122	Eggs- PM	65	49	72	106	59
#Females	4	4	4	5	5	#Females	5	5	5	4	5
Eggs/Females	27.75	17	26	14	35.4	Eggs/Females	37.4	12.6	20.4	45	27.2
Average	24.03					Average	28.52
Std. Dev.	8.61711					Std. Dev.	12.9573
Std. Error	3.85369					Std. Error	5.79469
AID-tub-AID
0 mM auxin						10 mM auxin
	Bottle 1	Bottle 2	Bottle 3	Bottle 4	Bottle 5		Bottle 1	Bottle 2	Bottle 3	Bottle 4	Bottle 5
Eggs - AM	29	16	89	71	55	Eggs - AM	22	20	39	15	64
Eggs- PM	93	63	139	102	47	Eggs- PM	81	59	110	111	61
#Females	5	5	5	5	5	#Females	4	5	5	5	5
Eggs/Females	24.4	15.8	45.6	34.6	20.4	Eggs/Females	25.75	15.8	29.8	25.2	25
Average	28.16					Average	24.31
Std. Dev.	11.9661					Std. Dev.	5.14543
Std. Error	5.35141					Std. Error	2.30111
	F Test	T Test	Different?
Oregon-R	0.577135	0.226755	no
VK00040	0.448866	0.53686	no
AID-tub-AID	0.130905	0.527232	no

## Sheet: Day 2
Egg Laying Counts - Day 2 - 12/03/2022
Oregon-R
0 mM auxin						10 mM auxin
	Bottle 1	Bottle 2	Bottle 3	Bottle 4	Bottle 5		Bottle 1	Bottle 2	Bottle 3	Bottle 4	Bottle 5
Eggs - AM	44	42	71	73	100	Eggs - AM	58	37	44	77	33
Eggs- PM	139	132	175	136	192	Eggs- PM	107	141	78	159	65
#Females	4	5	5	5	5	#Females	5	5	5	5	5
Eggs/Females	45.75	34.8	49.2	41.8	58.4	Eggs/Females	33	35.6	24.4	47.2	19.6
Average	45.99					Average	31.96
Std. Dev.	8.76273					Std. Dev.	10.6831
Std. Error	3.91881					Std. Error	4.77761
VK00040
0 mM auxin						10 mM auxin
	Bottle 1	Bottle 2	Bottle 3	Bottle 4	Bottle 5		Bottle 1	Bottle 2	Bottle 3	Bottle 4	Bottle 5
Eggs - AM	51	51	6	58	94	Eggs - AM	67	22	51	19	88
Eggs- PM	42	31	114	36	73	Eggs- PM	113	54	59	114	74
#Females	4	4	4	5	5	#Females	5	5	4	4	5
Eggs/Females	23.25	20.5	30	18.8	33.4	Eggs/Females	36	15.2	27.5	33.25	32.4
Average	25.19					Average	28.87
Std. Dev.	6.26762					Std. Dev.	8.2345
Std. Error	2.80296					Std. Error	3.68258
AID-tub-AID
0 mM auxin						10 mM auxin
	Bottle 1	Bottle 2	Bottle 3	Bottle 4	Bottle 5		Bottle 1	Bottle 2	Bottle 3	Bottle 4	Bottle 5
Eggs - AM	6	7	79	69	25	Eggs - AM	9	39	12	33	9
Eggs- PM	53	82	50	122	35	Eggs- PM	28	45	80	48	64
#Females	5	5	5	5	4	#Females	4	5	5	5	5
Eggs/Females	11.8	17.8	25.8	38.2	15	Eggs/Females	9.25	16.8	18.4	16.2	14.6
Average	21.72					Average	15.05
Std. Dev.	10.5732					Std. Dev.	3.51603
Std. Error	4.72847					Std. Error	1.57242
	F Test	T Test	Different?
Oregon-R	0.710343	0.0528479	no
VK00040	0.609915	0.449462	no
AID-tub-AID	0.0555403	0.217513	no

## Sheet: Day 3
Egg Laying Counts - Day 3 - 12/04/2022
Oregon-R
0 mM auxin						10 mM auxin
	Bottle 1	Bottle 2	Bottle 3	Bottle 4	Bottle 5		Bottle 1	Bottle 2	Bottle 3	Bottle 4	Bottle 5
Eggs - AM	34	73	53	30	46	Eggs - AM	86	29	49	129	12
Eggs- PM	121	145	201	152	145	Eggs- PM	156	143	157	157	107
#Females	4	5	5	5	5	#Females	5	5	5	5	5
Eggs/Females	38.75	43.6	50.8	36.4	38.2	Eggs/Females	48.4	34.4	41.2	57.2	23.8
Average	41.55					Average	41
Std. Dev.	5.817					Std. Dev.	12.8125
Std. Error	2.60144					Std. Error	5.72992
VK00040
0 mM auxin						10 mM auxin
	Bottle 1	Bottle 2	Bottle 3	Bottle 4	Bottle 5		Bottle 1	Bottle 2	Bottle 3	Bottle 4	Bottle 5
Eggs - AM	32	42	3	34	53	Eggs - AM	52	22	30	63	57
Eggs- PM	81	26	66	62	46	Eggs- PM	95	54	66	105	69
#Females	4	4	4	5	5	#Females	5	5	4	4	5
Eggs/Females	28.25	17	17.25	19.2	19.8	Eggs/Females	29.4	15.2	24	42	25.2
Average	20.3					Average	27.16
Std. Dev.	4.60584					Std. Dev.	9.77384
Std. Error	2.05979					Std. Error	4.371
AID-tub-AID
0 mM auxin						10 mM auxin
	Bottle 1	Bottle 2	Bottle 3	Bottle 4	Bottle 5		Bottle 1	Bottle 2	Bottle 3	Bottle 4	Bottle 5
Eggs - AM	26	17	21	15	29	Eggs - AM	9	60	19	44	41
Eggs- PM	54	59	84	106	5	Eggs- PM	70	53	53	57	49
#Females	5	5	5	5	4	#Females	4	5	5	5	5
Eggs/Females	16	15.2	21	24.2	8.5	Eggs/Females	19.75	22.6	14.4	20.2	18
Average	16.98					Average	18.99
Std. Dev.	6.00683					Std. Dev.	3.04639
Std. Error	2.68634					Std. Error	1.36239
	F Test	T Test	Different?
Oregon-R	0.155273	0.932501	no
VK00040	0.174121	0.193467	no
AID-tub-AID	0.216879	0.523348	no

## Sheet: Day 4
Egg Laying Counts - Day 4 - 12/05/2022
Oregon-R
0 mM auxin						10 mM auxin
	Bottle 1	Bottle 2	Bottle 3	Bottle 4	Bottle 5		Bottle 1	Bottle 2	Bottle 3	Bottle 4	Bottle 5
Eggs - AM	26	29	29	64	40	Eggs - AM	54	12	4	53	40
Eggs- PM	97	176	230	115	159	Eggs- PM	166	120	139	165	89
#Females	4	5	5	5	5	#Females	5	5	5	5	5
Eggs/Females	30.75	41	51.8	35.8	39.8	Eggs/Females	44	26.4	28.6	43.6	25.8
Average	39.83					Average	33.68
Std. Dev.	7.79965					Std. Dev.	9.29796
Std. Error	3.48811					Std. Error	4.15817
VK00040
0 mM auxin						10 mM auxin
	Bottle 1	Bottle 2	Bottle 3	Bottle 4	Bottle 5		Bottle 1	Bottle 2	Bottle 3	Bottle 4	Bottle 5
Eggs - AM	54	12	4	53	40	Eggs - AM	68	1	37	2	40
Eggs- PM	84	3	74	32	67	Eggs- PM	89	21	38	81	45
#Females	4	4	4	5	5	#Females	5	4	4	4	5
Eggs/Females	34.5	3.75	19.5	17	21.4	Eggs/Females	31.4	5.5	18.75	20.75	17
Average	19.23					Average	18.68
Std. Dev.	10.9836					Std. Dev.	9.25504
Std. Error	4.91202					Std. Error	4.13898
AID-tub-AID
0 mM auxin						10 mM auxin
	Bottle 1	Bottle 2	Bottle 3	Bottle 4	Bottle 5		Bottle 1	Bottle 2	Bottle 3	Bottle 4	Bottle 5
Eggs - AM	6	19	22	48	21	Eggs - AM	2	40	15	34	6
Eggs- PM	39	45	79	101	14	Eggs- PM	22	45	23	50	76
#Females	5	5	5	5	4	#Females	4	5	5	5	5
Eggs/Females	9	12.8	20.2	29.8	8.75	Eggs/Females	6	17	7.6	16.8	16.4
Average	16.11					Average	12.76
Std. Dev.	8.94178					Std. Dev.	5.4743
Std. Error	3.99889					Std. Error	2.44818
	F Test	T Test	Different?
Oregon-R	0.741736	0.289975	no
VK00040	0.748067	0.933868	no
AID-tub-AID	0.364898	0.495252	no

## Sheet: Day 5
Egg Laying Counts - Day 5 - 12/06/2022
Oregon-R
0 mM auxin						10 mM auxin
	Bottle 1	Bottle 2	Bottle 3	Bottle 4	Bottle 5		Bottle 1	Bottle 2	Bottle 3	Bottle 4	Bottle 5
Eggs - AM	58	48	74	92	50	Eggs - AM	55	60	69	57	9
Eggs- PM	100	174	142	105	167	Eggs- PM	160	119	144	218	103
#Females	4	5	5	5	5	#Females	5	4	5	5	5
Eggs/Females	39.5	44.4	43.2	39.4	43.4	Eggs/Females	43	44.75	42.6	55	22.4
Average	41.98					Average	41.55
Std. Dev.	2.35415					Std. Dev.	11.8435
Std. Error	1.05281					Std. Error	5.29656
VK00040
0 mM auxin						10 mM auxin
	Bottle 1	Bottle 2	Bottle 3	Bottle 4	Bottle 5		Bottle 1	Bottle 2	Bottle 3	Bottle 4	Bottle 5
Eggs - AM	78	37	17	54	75	Eggs - AM	31	5	33	10	44
Eggs- PM	55	2	48	14	30	Eggs- PM	47	28	63	53	37
#Females	4	4	4	5	4	#Females	5	4	4	4	5
Eggs/Females	33.25	9.75	16.25	13.6	26.25	Eggs/Females	15.6	8.25	24	15.75	16.2
Average	19.82					Average	15.96
Std. Dev.	9.67662					Std. Dev.	5.57488
Std. Error	4.32752					Std. Error	2.49316
AID-tub-AID
0 mM auxin						10 mM auxin
	Bottle 1	Bottle 2	Bottle 3	Bottle 4	Bottle 5		Bottle 1	Bottle 2	Bottle 3	Bottle 4	Bottle 5
Eggs - AM	25	29	20	27	34	Eggs - AM	3	23	26	16	8
Eggs- PM	56	52	60	59	29	Eggs- PM	36	27	53	58	32
#Females	5	5	5	5	4	#Females	4	5	5	5	5
Eggs/Females	16.2	16.2	16	17.2	15.75	Eggs/Females	9.75	10	15.8	14.8	8
Average	16.27					Average	11.67
Std. Dev.	0.551815					Std. Dev.	3.42045
Std. Error	0.246779					Std. Error	1.52967
	F Test	T Test	Different?
Oregon-R	0.00844824	0.93849	no
VK00040	0.310701	0.461817	no
AID-tub-AID	0.00379548	0.0179041	no

## Sheet: Day 6
Egg Laying Counts - Day 6 - 12/07/2022
Oregon-R
0 mM auxin						10 mM auxin
	Bottle 1	Bottle 2	Bottle 3	Bottle 4	Bottle 5		Bottle 1	Bottle 2	Bottle 3	Bottle 4	Bottle 5
Eggs - AM	19	29	42	75	50	Eggs - AM	37	26	26	69	21
Eggs- PM	102	220	144	96	104	Eggs- PM	139	124	163	183	71
#Females	4	5	5	5	5	#Females	5	4	5	5	5
Eggs/Females	30.25	49.8	37.2	34.2	30.8	Eggs/Females	35.2	37.5	37.8	50.4	18.4
Average	36.45					Average	35.86
Std. Dev.	7.97198					Std. Dev.	11.4363
Std. Error	3.56518					Std. Error	5.11445
VK00040
0 mM auxin						10 mM auxin
	Bottle 1	Bottle 2	Bottle 3	Bottle 4	Bottle 5		Bottle 1	Bottle 2	Bottle 3	Bottle 4	Bottle 5
Eggs - AM	64	3	16	13	34	Eggs - AM	38	2	12	4	46
Eggs- PM	67	6	29	7	34	Eggs- PM	36	26	43	39	14
#Females	4	4	4	5	4	#Females	5	4	4	4	5
Eggs/Females	32.75	2.25	11.25	4	17	Eggs/Females	14.8	7	13.75	10.75	12
Average	13.45					Average	11.66
Std. Dev.	12.2951					Std. Dev.	3.03673
Std. Error	5.49852					Std. Error	1.35807
AID-tub-AID
0 mM auxin						10 mM auxin
	Bottle 1	Bottle 2	Bottle 3	Bottle 4	Bottle 5		Bottle 1	Bottle 2	Bottle 3	Bottle 4	Bottle 5
Eggs - AM	6	1	23	2	8	Eggs - AM	10	6	33	18	9
Eggs- PM	49	58	61	26	22	Eggs- PM	19	21	47	43	29
#Females	5	4	5	5	4	#Females	4	5	5	5	5
Eggs/Females	11	14.75	16.8	5.6	7.5	Eggs/Females	7.25	5.4	16	12.2	7.6
Average	11.13					Average	9.69
Std. Dev.	4.71773					Std. Dev.	4.32556
Std. Error	2.10983					Std. Error	1.93445
	F Test	T Test	Different?
Oregon-R	0.501754	0.926932	no
VK00040	0.0190742	0.760057	no
AID-tub-AID	0.870471	0.628471	no
