# Supplementary material for: Auxin exposure disrupts feeding behavior and fatty acid metabolism in adult Drosophila
Source: eLife. 2024 Jan 19;12:RP91953. doi: 10.7554/eLife.91953 (PMC10945601; doi:10.7554/eLife.91953)
Supplement: Figure 4—figure supplement 1—source data 2. [file elife-91953-fig4-figsupp1-data2.xlsx]

## Sheet: Day 0
Hatching Counts - Day 0 - 12/01/2022
Oregon-R
0 mM auxin						10 mM auxin
	Bottle 1	Bottle 2	Bottle 3	Bottle 4	Bottle 5		Bottle 1	Bottle 2	Bottle 3	Bottle 4	Bottle 5
Hatched	0	8	16	4	0	Hatched	4	0	0	9	1
# Eggs	30	30	30	30	30	# Eggs	30	30	30	30	30
%Hatched	0	26.6667	53.3333	13.3333	0	%Hatched	13.3333	0	0	30	3.33333
Average	18.6667					Average	9.33333
Std. Dev.	22.3109					Std. Dev.	12.7802
Std. Error	9.97775					Std. Error	5.71548
VK00040
0 mM auxin						10 mM auxin
	Bottle 1	Bottle 2	Bottle 3	Bottle 4	Bottle 5		Bottle 1	Bottle 2	Bottle 3	Bottle 4	Bottle 5
Hatched	18	17	8	4	17	Hatched	13	1	9	4	1
# Eggs	30	30	30	30	30	# Eggs	30	30	30	30	30
%Hatched	60	56.6667	26.6667	13.3333	56.6667	%Hatched	43.3333	3.33333	30	13.3333	3.33333
Average	42.6667					Average	18.6667
Std. Dev.	21.2655					Std. Dev.	17.5752
Std. Error	9.51023					Std. Error	7.85988
AID-tub-AID
0 mM auxin						10 mM auxin
	Bottle 1	Bottle 2	Bottle 3	Bottle 4	Bottle 5		Bottle 1	Bottle 2	Bottle 3	Bottle 4	Bottle 5
Hatched	21	15	17	21	18	Hatched	21	16	22	23	8
# Eggs	30	30	30	30	30	# Eggs	30	30	30	30	30
%Hatched	70	50	56.6667	70	60	%Hatched	70	53.3333	73.3333	76.6667	26.6667
Average	61.3333					Average	60
Std. Dev.	8.69227					Std. Dev.	20.6828
Std. Error	3.8873					Std. Error	9.24962
	F Test	T Test	Different?
Oregon-R	0.305908	0.440456	no
VK00040	0.720858	0.0876348	no
AID-tub-AID	0.121669	0.897561	no

## Sheet: Day 2
Hatching Counts - Day 2 - 12/03/2022
Oregon-R
0 mM auxin						10 mM auxin
	Bottle 1	Bottle 2	Bottle 3	Bottle 4	Bottle 5		Bottle 1	Bottle 2	Bottle 3	Bottle 4	Bottle 5
Hatched	19	9	10	4	20	Hatched	0	3	0	1	0
# Eggs	30	30	30	30	30	# Eggs	30	30	30	30	30
%Hatched	63.3333	30	33.3333	13.3333	66.6667	%Hatched	0	10	0	3.33333	0
Average	41.3333					Average	2.66667
Std. Dev.	22.925					Std. Dev.	4.34613
Std. Error	10.2524					Std. Error	1.94365
VK00040
0 mM auxin						10 mM auxin
	Bottle 1	Bottle 2	Bottle 3	Bottle 4	Bottle 5		Bottle 1	Bottle 2	Bottle 3	Bottle 4	Bottle 5
Hatched	13	14	10	4	5	Hatched	9	7	13	7	4
# Eggs	30	30	30	30	30	# Eggs	30	30	30	30	30
%Hatched	43.3333	46.6667	33.3333	13.3333	16.6667	%Hatched	30	23.3333	43.3333	23.3333	13.3333
Average	30.6667					Average	26.6667
Std. Dev.	15.1658					Std. Dev.	11.0554
Std. Error	6.78233					Std. Error	4.94413
AID-tub-AID
0 mM auxin						10 mM auxin
	Bottle 1	Bottle 2	Bottle 3	Bottle 4	Bottle 5		Bottle 1	Bottle 2	Bottle 3	Bottle 4	Bottle 5
Hatched	24	17	29	30	21	Hatched	19	17	24	17	8
# Eggs	30	30	30	30	30	# Eggs	30	30	30	30	30
%Hatched	80	56.6667	96.6667	100	70	%Hatched	63.3333	56.6667	80	56.6667	26.6667
Average	80.6667					Average	56.6667
Std. Dev.	18.1659					Std. Dev.	19.2931
Std. Error	8.12404					Std. Error	8.62812
	F Test	T Test	Different?
Oregon-R	0.00705495	0.00599514	yes (*)
VK00040	0.555335	0.646406	no
AID-tub-AID	0.909919	0.0774367	no

## Sheet: Day 4
Hatching Counts - Day 4 - 12/05/2022
Oregon-R
0 mM auxin						10 mM auxin
	Bottle 1	Bottle 2	Bottle 3	Bottle 4	Bottle 5		Bottle 1	Bottle 2	Bottle 3	Bottle 4	Bottle 5
Hatched	13	1	3	5	22	Hatched	3	1	2	0	0
# Eggs	30	30	30	30	30	# Eggs	30	30	30	30	30
%Hatched	43.3333	3.33333	10	16.6667	73.3333	%Hatched	10	3.33333	6.66667	0	0
Average	29.3333					Average	4
Std. Dev.	28.906					Std. Dev.	4.34613
Std. Error	12.9271					Std. Error	1.94365
VK00040
0 mM auxin						10 mM auxin
	Bottle 1	Bottle 2	Bottle 3	Bottle 4	Bottle 5		Bottle 1	Bottle 2	Bottle 3	Bottle 4	Bottle 5
Hatched	10	12	7	5	4	Hatched	9	4	3	17	9
# Eggs	30	30	30	30	30	# Eggs	30	30	30	30	30
%Hatched	33.3333	40	23.3333	16.6667	13.3333	%Hatched	30	13.3333	10	56.6667	30
Average	25.3333					Average	28
Std. Dev.	11.2052					Std. Dev.	18.4992
Std. Error	5.0111					Std. Error	8.27312
AID-tub-AID
0 mM auxin						10 mM auxin
	Bottle 1	Bottle 2	Bottle 3	Bottle 4	Bottle 5		Bottle 1	Bottle 2	Bottle 3	Bottle 4	Bottle 5
Hatched	12	21	16	25	23	Hatched	18	29	16	3	8
# Eggs	30	30	30	30	30	# Eggs	30	30	30	30	30
%Hatched	40	70	53.3333	83.3333	76.6667	%Hatched	60	96.6667	53.3333	10	26.6667
Average	64.6667					Average	49.3333
Std. Dev.	17.7326					Std. Dev.	33.2833
Std. Error	7.93025					Std. Error	14.8847
	F Test	T Test	Different?
Oregon-R	0.002889	0.0886307	no
VK00040	0.354911	0.789767	no
AID-tub-AID	0.250064	0.389836	no
