# Supplementary material for: Auxin exposure disrupts feeding behavior and fatty acid metabolism in adult Drosophila
Source: eLife. 2024 Jan 19;12:RP91953. doi: 10.7554/eLife.91953 (PMC10945601; doi:10.7554/eLife.91953)
Supplement: Figure 4—figure supplement 2—source data 1. [file elife-91953-fig4-figsupp2-data1.xlsx]

## Sheet: 1d 2023_0623
Egg Laying Counts - 1d - 6/23/23
OreR
inactive yeast paste						active yeast paste
	Bottle 1	Bottle 2	Bottle 3	Bottle 4	Bottle 5		Bottle 1	Bottle 2	Bottle 3	Bottle 4	Bottle 5
Eggs - AM	27	18	34	25	39	Eggs- AM	76	52	90	72	46
Eggs- PM	91	90	37	64	56	Eggs- PM	75	84	62	74	78
#Females	5	5	5	5	5	#Females	5	5	5	5	5
Eggs/Females	23.6	21.6	14.2	17.8	19	Eggs/Females	30.2	27.2	30.4	29.2	24.8
Average	19.24					Average	28.36
Std. Dev.	3.60943					Std. Dev.	2.35966
Std. Error	1.61419					Std. Error	1.05527
VK00040
inactive yeast paste						active yeast paste
	Bottle 1	Bottle 2	Bottle 3	Bottle 4	Bottle 5		Bottle 1	Bottle 2	Bottle 3	Bottle 4	Bottle 5
Eggs - AM	0	0	1	0	1	Eggs - AM	11	8	1	4	6
Eggs- PM	19	2	22	12	11	Eggs- PM	25	44	16	24	26
#Females	4	5	5	4	5	#Females	5	5	5	5	5
Eggs/Females	4.75	0.4	4.6	3	2.4	Eggs/Females	7.2	10.4	3.4	5.6	6.4
Average	3.03					Average	6.6
Std. Dev.	1.78452					Std. Dev.	2.55343
Std. Error	0.79806					Std. Error	1.14193
AID-tub-AID
inactive yeast paste						active yeast paste
	Bottle 1	Bottle 2	Bottle 3	Bottle 4	Bottle 5		Bottle 1	Bottle 2	Bottle 3	Bottle 4	Bottle 5
Eggs - AM	0	1	9	0	2	Eggs - AM	1	9	0	0	10
Eggs- PM	26	24	29	34	27	Eggs- PM	40	45	23	41	34
#Females	5	5	5	5	5	#Females	5	5	5	5	5
Eggs/Females	5.2	5	7.6	6.8	5.8	Eggs/Females	8.2	10.8	4.6	8.2	8.8
Average	6.08					Average	8.12
Std. Dev.	1.10091					Std. Dev.	2.23875
Std. Error	0.492341					Std. Error	1.0012
	F Test	T Test	Different?
OreR	0.430537	0.00148482	**
VK00040	0.504742	0.0335155	*
AID-tub-AID	0.197982	0.104888	no

## Sheet: 2d 2023_0624
Egg Laying Counts - 2d - 6/24/23
OreR
inactive yeast paste						active yeast paste
	Bottle 1	Bottle 2	Bottle 3	Bottle 4	Bottle 5		Bottle 1	Bottle 2	Bottle 3	Bottle 4	Bottle 5
Eggs - AM	36	48	51	41	44	Eggs- AM	123	140	140	135	86
Eggs- PM	176	110	97	116	111	Eggs- PM	150	171	189	140	139
#Females	5	5	5	5	5	#Females	5	4	5	5	5
Eggs/Females	42.4	31.6	29.6	31.4	31	Eggs/Females	54.6	77.75	65.8	55	45
Average	33.2					Average	59.63
Std. Dev.	5.20192					Std. Dev.	12.5218
Std. Error	2.32637					Std. Error	5.5999
VK00040
inactive yeast paste						active yeast paste
	Bottle 1	Bottle 2	Bottle 3	Bottle 4	Bottle 5		Bottle 1	Bottle 2	Bottle 3	Bottle 4	Bottle 5
Eggs - AM	18	10	13	13	7	Eggs - AM	36	65	72	71	57
Eggs- PM	57	60	83	39	30	Eggs- PM	120	132	70	43	97
#Females	4	5	5	4	5	#Females	5	5	5	5	5
Eggs/Females	18.75	14	19.2	13	7.4	Eggs/Females	31.2	39.4	28.4	22.8	30.8
Average	14.47					Average	30.52
Std. Dev.	4.82333					Std. Dev.	5.98932
Std. Error	2.15706					Std. Error	2.67851
AID-tub-AID
inactive yeast paste						active yeast paste
	Bottle 1	Bottle 2	Bottle 3	Bottle 4	Bottle 5		Bottle 1	Bottle 2	Bottle 3	Bottle 4	Bottle 5
Eggs - AM	24	20	12	1	7	Eggs - AM	27	38	28	29	64
Eggs- PM	56	69	82	56	55	Eggs- PM	151	143	73	133	104
#Females	5	5	5	5	5	#Females	5	5	5	5	5
Eggs/Females	16	17.8	18.8	11.4	12.4	Eggs/Females	35.6	36.2	20.2	32.4	33.6
Average	15.28					Average	31.6
Std. Dev.	3.26374					Std. Dev.	6.55286
Std. Error	1.45959					Std. Error	2.93053
	F Test	T Test	Different?
OreR	0.117221	0.00241725	**
VK00040	0.685055	0.00160889	**
AID-tub-AID	0.205627	0.00107291	**

## Sheet: 3d 2023_0625
Egg Laying Counts - 3d - 6/25/23
OreR
inactive yeast paste						active yeast paste
	Bottle 1	Bottle 2	Bottle 3	Bottle 4	Bottle 5		Bottle 1	Bottle 2	Bottle 3	Bottle 4	Bottle 5
Eggs - AM	23	47	87	46	79	Eggs- AM	181	201	215	193	125
Eggs- PM	200	145	90	101	114	Eggs- PM	186	188	199	189	141
#Females	5	5	4	5	5	#Females	5	4	5	5	5
Eggs/Females	44.6	38.4	44.25	29.4	38.6	Eggs/Females	73.4	97.25	82.8	76.4	53.2
Average	39.05					Average	76.61
Std. Dev.	6.15609					Std. Dev.	15.9899
Std. Error	2.75309					Std. Error	7.15088
VK00040
inactive yeast paste						active yeast paste
	Bottle 1	Bottle 2	Bottle 3	Bottle 4	Bottle 5		Bottle 1	Bottle 2	Bottle 3	Bottle 4	Bottle 5
Eggs - AM	6	25	13	33	10	Eggs - AM	124	107	134	140	94
Eggs- PM	49	37	84	35	33	Eggs- PM	91	123	72	85	112
#Females	4	5	5	4	5	#Females	4	5	4	5	5
Eggs/Females	13.75	12.4	19.4	17	8.6	Eggs/Females	53.75	46	51.5	45	41.2
Average	14.23					Average	47.49
Std. Dev.	4.17367					Std. Dev.	5.08065
Std. Error	1.86652					Std. Error	2.27214
AID-tub-AID
inactive yeast paste						active yeast paste
	Bottle 1	Bottle 2	Bottle 3	Bottle 4	Bottle 5		Bottle 1	Bottle 2	Bottle 3	Bottle 4	Bottle 5
Eggs - AM	25	14	6	2	2	Eggs - AM	102	137	143	129	140
Eggs- PM	117	136	133	33	74	Eggs- PM	148	200	172	137	127
#Females	5	5	5	4	5	#Females	5	5	5	5	5
Eggs/Females	28.4	30	27.8	8.75	15.2	Eggs/Females	50	67.4	63	53.2	53.4
Average	22.03					Average	57.4
Std. Dev.	9.49208					Std. Dev.	7.41215
Std. Error	4.24499					Std. Error	3.31482
	F Test	T Test	Different?
OreR	0.0913814	0.00119111	**
VK00040	0.712437	3.35989e-06	****
AID-tub-AID	0.643503	0.000175298	***

## Sheet: 4d 2023_0626
Egg Laying Counts - 4d - 6/26/23
OreR
inactive yeast paste						active yeast paste
	Bottle 1	Bottle 2	Bottle 3	Bottle 4	Bottle 5		Bottle 1	Bottle 2	Bottle 3	Bottle 4	Bottle 5
Eggs - AM	13	33	56	38	90	Eggs- AM	162	174	195	180	104
Eggs- PM	98	182	77	179	161	Eggs- PM	187	184	196	196	152
#Females	5	5	4	5	5	#Females	5	4	5	5	5
Eggs/Females	22.2	43	33.25	43.4	50.2	Eggs/Females	69.8	89.5	78.2	75.2	51.2
Average	38.41					Average	72.78
Std. Dev.	10.8899					Std. Dev.	14.0478
Std. Error	4.87012					Std. Error	6.28239
VK00040
inactive yeast paste						active yeast paste
	Bottle 1	Bottle 2	Bottle 3	Bottle 4	Bottle 5		Bottle 1	Bottle 2	Bottle 3	Bottle 4	Bottle 5
Eggs - AM	7	6	67	29	16	Eggs - AM	88	85	128	87	94
Eggs- PM	54	47	59	69	41	Eggs- PM	57	120	110	80	111
#Females	4	5	5	4	5	#Females	3	5	4	5	5
Eggs/Females	15.25	10.6	25.2	24.5	11.4	Eggs/Females	48.3333	41	59.5	33.4	41
Average	17.39					Average	44.6467
Std. Dev.	7.03761					Std. Dev.	9.83993
Std. Error	3.14732					Std. Error	4.40055
AID-tub-AID
inactive yeast paste						active yeast paste
	Bottle 1	Bottle 2	Bottle 3	Bottle 4	Bottle 5		Bottle 1	Bottle 2	Bottle 3	Bottle 4	Bottle 5
Eggs - AM	49	12	10	13	25	Eggs - AM	55	110	177	144	136
Eggs- PM	60	83	52	40	54	Eggs- PM	211	183	181	158	128
#Females	5	5	5	4	5	#Females	5	5	5	5	5
Eggs/Females	21.8	19	12.4	13.25	15.8	Eggs/Females	53.2	58.6	71.6	60.4	52.8
Average	16.45					Average	59.32
Std. Dev.	3.94303					Std. Dev.	7.62312
Std. Error	1.76338					Std. Error	3.40916
	F Test	T Test	Different?
OreR	0.633844	0.002533	**
VK00040	0.532125	0.00100412	**
AID-tub-AID	0.229695	3.69656e-06	****

## Sheet: 5d 2023_0627
Egg Laying Counts - 5d - 6/27/23
OreR
inactive yeast paste						active yeast paste
	Bottle 1	Bottle 2	Bottle 3	Bottle 4	Bottle 5		Bottle 1	Bottle 2	Bottle 3	Bottle 4	Bottle 5
Eggs - AM	46	58	61	89	94	Eggs- AM	185	196	219	202	97
Eggs- PM	130	185	87	168	169	Eggs- PM	155	163	187	185	176
#Females	5	5	4	5	5	#Females	5	4	5	5	5
Eggs/Females	35.2	48.6	37	51.4	52.6	Eggs/Females	68	89.75	81.2	77.4	54.6
Average	44.96					Average	74.19
Std. Dev.	8.24184					Std. Dev.	13.4503
Std. Error	3.68586					Std. Error	6.01516
VK00040
inactive yeast paste						active yeast paste
	Bottle 1	Bottle 2	Bottle 3	Bottle 4	Bottle 5		Bottle 1	Bottle 2	Bottle 3	Bottle 4	Bottle 5
Eggs - AM	14	3	25	33	21	Eggs - AM	119	90	139	95	99
Eggs- PM	75	87	104	54	39	Eggs- PM	46	123	87	63	88
#Females	4	5	5	4	5	#Females	3	5	4	5	5
Eggs/Females	22.25	18	25.8	21.75	12	Eggs/Females	55	42.6	56.5	31.6	37.4
Average	19.96					Average	44.62
Std. Dev.	5.23825					Std. Dev.	10.8927
Std. Error	2.34262					Std. Error	4.87139
AID-tub-AID
inactive yeast paste						active yeast paste
	Bottle 1	Bottle 2	Bottle 3	Bottle 4	Bottle 5		Bottle 1	Bottle 2	Bottle 3	Bottle 4	Bottle 5
Eggs - AM	17	10	24	7	19	Eggs - AM	42	100	182	117	171
Eggs- PM	155	125	104	98	76	Eggs- PM	112	194	167	141	95
#Females	5	5	5	4	5	#Females	5	5	5	5	5
Eggs/Females	34.4	27	25.6	26.25	19	Eggs/Females	30.8	58.8	69.8	51.6	53.2
Average	26.45					Average	52.84
Std. Dev.	5.47197					Std. Dev.	14.2354
Std. Error	2.44714					Std. Error	6.36629
	F Test	T Test	Different?
OreR	0.365741	0.00323829	**
VK00040	0.185161	0.00184479	**
AID-tub-AID	0.090902	0.00474628	**

## Sheet: 6d 2023_0628
Egg Laying Counts - 6d - 6/28/23
OreR
inactive yeast paste						active yeast paste
	Bottle 1	Bottle 2	Bottle 3	Bottle 4	Bottle 5		Bottle 1	Bottle 2	Bottle 3	Bottle 4	Bottle 5
Eggs - AM	35	10	48	64	83	Eggs- AM	116	119	158	132	80
Eggs- PM	156	212	89	184	163	Eggs- PM	74	223	202	162	113
#Females	5	5	4	5	5	#Females	5	4	5	5	5
Eggs/Females	38.2	44.4	34.25	49.6	49.2	Eggs/Females	38	85.5	72	58.8	38.6
Average	43.13					Average	58.58
Std. Dev.	6.7727					Std. Dev.	20.782
Std. Error	3.02884					Std. Error	9.294
VK00040
inactive yeast paste						active yeast paste
	Bottle 1	Bottle 2	Bottle 3	Bottle 4	Bottle 5		Bottle 1	Bottle 2	Bottle 3	Bottle 4	Bottle 5
Eggs - AM	1	11	22	38	11	Eggs - AM	77	103	111	82	101
Eggs- PM	97	54	100	62	72	Eggs- PM	92	98	124	92	104
#Females	4	5	5	4	5	#Females	3	5	4	5	5
Eggs/Females	24.5	13	24.4	25	16.6	Eggs/Females	56.3333	40.2	58.75	34.8	41
Average	20.7					Average	46.2167
Std. Dev.	5.53895					Std. Dev.	10.6441
Std. Error	2.4771					Std. Error	4.76018
AID-tub-AID
inactive yeast paste						active yeast paste
	Bottle 1	Bottle 2	Bottle 3	Bottle 4	Bottle 5		Bottle 1	Bottle 2	Bottle 3	Bottle 4	Bottle 5
Eggs - AM	21	18	6	0	23	Eggs - AM	86	112	140	98	120
Eggs- PM	103	79	147	93	138	Eggs- PM	162	145	143	94	118
#Females	5	5	5	4	5	#Females	5	5	5	5	5
Eggs/Females	24.8	19.4	30.6	23.25	32.2	Eggs/Females	49.6	51.4	56.6	38.4	47.6
Average	26.05					Average	48.72
Std. Dev.	5.29504					Std. Dev.	6.66723
Std. Error	2.36802					Std. Error	2.98168
	F Test	T Test	Different?
OreR	0.0517666	0.152637	no
VK00040	0.233742	0.00143574	**
AID-tub-AID	0.666146	0.0003405	***

## Sheet: 7d 2023_0629
Egg Laying Counts - 7d - 6/29/23
OreR
inactive yeast paste						active yeast paste
	Bottle 1	Bottle 2	Bottle 3	Bottle 4	Bottle 5		Bottle 1	Bottle 2	Bottle 3	Bottle 4	Bottle 5
Eggs - AM	15	22	63	94	100	Eggs- AM	136	140	124	120	63
Eggs- PM	215	153	72	104	164	Eggs- PM	156	161	170	169	140
#Females	5	5	4	5	5	#Females	5	4	5	5	5
Eggs/Females	46	35	33.75	39.6	52.8	Eggs/Females	58.4	75.25	58.8	57.8	40.6
Average	41.43					Average	58.17
Std. Dev.	7.96615					Std. Dev.	12.2578
Std. Error	3.56257					Std. Error	5.48187
VK00040
inactive yeast paste						active yeast paste
	Bottle 1	Bottle 2	Bottle 3	Bottle 4	Bottle 5		Bottle 1	Bottle 2	Bottle 3	Bottle 4	Bottle 5
Eggs - AM	17	39	44	48	23	Eggs - AM	85	92	105	94	99
Eggs- PM	55	19	91	50	69	Eggs- PM	76	119	130	54	102
#Females	4	5	5	4	5	#Females	3	5	4	5	5
Eggs/Females	18	11.6	27	24.5	18.4	Eggs/Females	53.6667	42.2	58.75	29.6	40.2
Average	19.9					Average	44.8833
Std. Dev.	6.04814					Std. Dev.	11.5341
Std. Error	2.70481					Std. Error	5.15822
AID-tub-AID
inactive yeast paste						active yeast paste
	Bottle 1	Bottle 2	Bottle 3	Bottle 4	Bottle 5		Bottle 1	Bottle 2	Bottle 3	Bottle 4	Bottle 5
Eggs - AM	87	22	29	57	52	Eggs - AM	31	97	92	132	128
Eggs- PM	65	84	71	68	43	Eggs- PM	218	194	183	109	106
#Females	5	5	5	4	5	#Females	5	5	5	5	5
Eggs/Females	30.4	21.2	20	31.25	19	Eggs/Females	49.8	58.2	55	48.2	46.8
Average	24.37					Average	51.6
Std. Dev.	5.95143					Std. Dev.	4.82079
Std. Error	2.66156					Std. Error	2.15592
	F Test	T Test	Different?
OreR	0.424303	0.0336211	*
VK00040	0.238941	0.00265335	**
AID-tub-AID	0.69303	4.56857e-05	****

## Sheet: 8d 2023_0630
Egg Laying Counts - 8d - 6/30/23
OreR
inactive yeast paste						active yeast paste
	Bottle 1	Bottle 2	Bottle 3	Bottle 4	Bottle 5		Bottle 1	Bottle 2	Bottle 3	Bottle 4	Bottle 5
Eggs - AM	64	103	72	121	130	Eggs- AM	153	162	138	172	84
Eggs- PM	187	145	80	118	125	Eggs- PM	71	176	122	186	164
#Females	5	5	4	5	5	#Females	5	4	5	5	5
Eggs/Females	50.2	49.6	38	47.8	51	Eggs/Females	44.8	84.5	52	71.6	49.6
Average	47.32					Average	60.5
Std. Dev.	5.34154					Std. Dev.	16.8579
Std. Error	2.38881					Std. Error	7.5391
VK00040
inactive yeast paste						active yeast paste
	Bottle 1	Bottle 2	Bottle 3	Bottle 4	Bottle 5		Bottle 1	Bottle 2	Bottle 3	Bottle 4	Bottle 5
Eggs - AM	52	69	73	83	33	Eggs - AM	75	144	107	113	100
Eggs- PM	39	25	57	36	51	Eggs- PM	87	63	100	58	101
#Females	4	5	5	4	5	#Females	3	5	4	5	5
Eggs/Females	22.75	18.8	26	29.75	16.8	Eggs/Females	54	41.4	51.75	34.2	40.2
Average	22.82					Average	44.31
Std. Dev.	5.25697					Std. Dev.	8.31898
Std. Error	2.35099					Std. Error	3.72036
AID-tub-AID
inactive yeast paste						active yeast paste
	Bottle 1	Bottle 2	Bottle 3	Bottle 4	Bottle 5		Bottle 1	Bottle 2	Bottle 3	Bottle 4	Bottle 5
Eggs - AM	96	52	106	57	100	Eggs - AM	149	68	173	137	116
Eggs- PM	55	53	79	81	38	Eggs- PM	100	125	135	132	111
#Females	5	5	5	4	5	#Females	5	5	5	5	5
Eggs/Females	30.2	21	37	34.5	27.6	Eggs/Females	49.8	38.6	61.6	53.8	45.4
Average	30.06					Average	49.84
Std. Dev.	6.24564					Std. Dev.	8.66072
Std. Error	2.79313					Std. Error	3.87319
	F Test	T Test	Different?
OreR	0.0469078	0.134162	no
VK00040	0.395663	0.00121964	**
AID-tub-AID	0.542121	0.00324367	***

## Sheet: 9d 2023_0701
Egg Laying Counts - 9d - 7/01/23
OreR
inactive yeast paste						active yeast paste
	Bottle 1	Bottle 2	Bottle 3	Bottle 4	Bottle 5		Bottle 1	Bottle 2	Bottle 3	Bottle 4	Bottle 5
Eggs - AM	104	83	73	151	146	Eggs- AM	166	141	169	131	102
Eggs- PM	152	196	81	116	132	Eggs- PM	145	163	130	162	131
#Females	5	5	4	5	5	#Females	5	4	5	5	5
Eggs/Females	51.2	55.8	38.5	53.4	55.6	Eggs/Females	62.2	76	59.8	58.6	46.6
Average	50.9					Average	60.64
Std. Dev.	7.17983					Std. Dev.	10.4923
Std. Error	3.21092					Std. Error	4.69229
VK00040
inactive yeast paste						active yeast paste
	Bottle 1	Bottle 2	Bottle 3	Bottle 4	Bottle 5		Bottle 1	Bottle 2	Bottle 3	Bottle 4	Bottle 5
Eggs - AM	60	50	73	41	32	Eggs - AM	61	116	107	97	118
Eggs- PM	58	43	81	38	57	Eggs- PM	89	94	54	64	80
#Females	4	5	5	4	5	#Females	3	5	4	5	5
Eggs/Females	29.5	18.6	30.8	19.75	17.8	Eggs/Females	50	42	40.25	32.2	39.6
Average	23.29					Average	40.81
Std. Dev.	6.31728					Std. Dev.	6.35968
Std. Error	2.82517					Std. Error	2.84413
AID-tub-AID
inactive yeast paste						active yeast paste
	Bottle 1	Bottle 2	Bottle 3	Bottle 4	Bottle 5		Bottle 1	Bottle 2	Bottle 3	Bottle 4	Bottle 5
Eggs - AM	71	77	72	61	52	Eggs - AM	138	136	161	126	112
Eggs- PM	66	30	38	48	44	Eggs- PM	129	153	126	130	108
#Females	5	5	5	4	5	#Females	5	5	5	5	5
Eggs/Females	27.4	21.4	22	27.25	19.2	Eggs/Females	53.4	57.8	57.4	51.2	44
Average	23.45					Average	52.76
Std. Dev.	3.68816					Std. Dev.	5.62388
Std. Error	1.64939					Std. Error	2.51507
	F Test	T Test	Different?
OreR	0.480517	0.125055	no
VK00040	0.989966	0.00237935	**
AID-tub-AID	0.433859	1.02896e-05	****

## Sheet: 10d 2023_0702
Egg Laying Counts - 10d - 7/02/23
OreR
inactive yeast paste						active yeast paste
	Bottle 1	Bottle 2	Bottle 3	Bottle 4	Bottle 5		Bottle 1	Bottle 2	Bottle 3	Bottle 4	Bottle 5
Eggs - AM	27	44	53	66	101	Eggs- AM	136	114	94	141	107
Eggs- PM	191	146	105	129	114	Eggs- PM	178	157	184	126	112
#Females	5	5	4	5	5	#Females	5	4	5	5	5
Eggs/Females	43.6	38	39.5	39	43	Eggs/Females	62.8	67.75	55.6	53.4	43.8
Average	40.62					Average	56.67
Std. Dev.	2.51436					Std. Dev.	9.18991
Std. Error	1.12446					Std. Error	4.10985
VK00040
inactive yeast paste						active yeast paste
	Bottle 1	Bottle 2	Bottle 3	Bottle 4	Bottle 5		Bottle 1	Bottle 2	Bottle 3	Bottle 4	Bottle 5
Eggs - AM	23	55	46	48	44	Eggs - AM	56	77	89	88	116
Eggs- PM	67	77	75	56	49	Eggs- PM	178	157	184	126	112
#Females	4	5	5	4	5	#Females	3	5	4	5	5
Eggs/Females	22.5	26.4	24.2	26	18.6	Eggs/Females	78	46.8	68.25	42.8	45.6
Average	23.54					Average	56.29
Std. Dev.	3.16828					Std. Dev.	15.8168
Std. Error	1.4169					Std. Error	7.07348
AID-tub-AID
inactive yeast paste						active yeast paste
	Bottle 1	Bottle 2	Bottle 3	Bottle 4	Bottle 5		Bottle 1	Bottle 2	Bottle 3	Bottle 4	Bottle 5
Eggs - AM	24	59	56	51	37	Eggs - AM	99	133	170	115	104
Eggs- PM	109	55	52	28	75	Eggs- PM	156	144	135	133	135
#Females	5	4	5	4	5	#Females	5	5	5	5	5
Eggs/Females	26.6	28.5	21.6	19.75	22.4	Eggs/Females	51	55.4	61	49.6	47.8
Average	23.77					Average	52.96
Std. Dev.	3.64445					Std. Dev.	5.29981
Std. Error	1.62985					Std. Error	2.37015
	F Test	T Test	Different?
OreR	0.0277502	0.00549064	**
VK00040	0.00869936	0.00189972	**
AID-tub-AID	0.486082	7.60612e-06	****
