# Supplementary material for: Auxin exposure disrupts feeding behavior and fatty acid metabolism in adult Drosophila
Source: eLife. 2024 Jan 19;12:RP91953. doi: 10.7554/eLife.91953 (PMC10945601; doi:10.7554/eLife.91953)
Supplement: Figure 4—figure supplement 3—source data 1. [file elife-91953-fig4-figsupp3-data1.xlsx]

## Sheet: Sheet1
Oregon-R
	0 mM	10 mM
N1	6	10
N2	5	10
N3	10	27
Average	7	15.6667
Std. Dev.	2.64575	9.81495
Std. Error	1.52753	5.66667
