# Supplementary material for: Auxin exposure disrupts feeding behavior and fatty acid metabolism in adult Drosophila
Source: eLife. 2024 Jan 19;12:RP91953. doi: 10.7554/eLife.91953 (PMC10945601; doi:10.7554/eLife.91953)
Supplement: Figure 4—figure supplement 3—source data 2. [file elife-91953-fig4-figsupp3-data2.xlsx]

## Sheet: Sheet1
Oregon-R
	0 mM	10 mM
N1	1	13
N2	3	4
N3	22	50
Average	8.66667	22.3333
Std. Dev.	11.5902	24.379
Std. Error	6.69162	14.0752
