# Supplementary material for: Auxin exposure disrupts feeding behavior and fatty acid metabolism in adult Drosophila
Source: eLife. 2024 Jan 19;12:RP91953. doi: 10.7554/eLife.91953 (PMC10945601; doi:10.7554/eLife.91953)
Supplement: Figure 4—source data 1. [file elife-91953-fig4-data1.xlsx]

## Sheet: 2022_0614, 0d
Oregon-R #25211					VK00040					AID
GSC Counts		Cap Cell Counts			GSC Counts		Cap Cell Counts			GSC Counts		Cap Cell Counts
Average	2.24138	Average	6.31034		Average	3.01031	Average	6.92784		Average	2.41	Average	6.59
Std. Dev.	0.4304	Std. Dev.	1.28778		Std. Dev.	0.653434	Std. Dev.	1.3482		Std. Dev.	0.570221	Std. Dev.	1.53145
4+	0	9+	6		4+	19	9+	14		4+	4	9+	14
3	21	7 to 8	33		3	59	7 to 8	44		3	33	7 to 8	38
2	66	5 to 6	44		2	19	5 to 6	39		2	63	5 to 6	43
0 to 1	0	3 to 4	4		0 to 1	0	3 to 4	0		0 to 1	0	3 to 4	5
Germ #	GSC #	CC #			Germ #	GSC #	CC #			Germ #	GSC #	CC #
1	2	7			1	3	8			1	3	6
2	2	9			2	5	9			2	2	7
3	2	6			3	3	8			3	3	5
4	2	5			4	2	5			4	2	6
5	2	6			5	4	8			5	3	9
6	2	5			6	2	6			6	3	5
7	3	8			7	3	6			7	3	6
8	2	6			8	4	9			8	2	5
9	3	9			9	4	6			9	2	5
10	2	6			10	4	7			10	2	6
11	2	5			11	3	8			11	2	5
12	3	7			12	2	7			12	4	7
13	3	7			13	4	9			13	2	5
14	2	7			14	3	7			14	2	6
15	2	6			15	3	7			15	3	5
16	3	8			16	3	6			16	2	4
17	2	7			17	3	8			17	2	7
18	2	6			18	3	5			18	3	8
19	2	7			19	3	6			19	2	4
20	2	5			20	3	8			20	3	7
21	2	5			21	3	7			21	2	5
22	3	8			22	4	8			22	2	8
23	2	4			23	2	7			23	2	5
24	2	6			24	2	5			24	2	5
25	2	5			25	3	7			25	2	5
26	2	7			26	2	5			26	2	4
27	2	7			27	3	7			27	3	5
28	2	9			28	4	9			28	3	7
29	2	6			29	3	5			29	2	6
30	2	7			30	3	6			30	4	7
31	3	9			31	3	8			31	2	5
32	2	4			32	4	10			32	3	6
33	2	5			33	4	6			33	2	4
34	2	8			34	3	7			34	4	8
35	2	8			35	3	5			35	2	7
36	2	5			36	3	7			36	2	5
37	2	5			37	4	8			37	2	4
38	3	7			38	3	9			38	2	9
39	3	7			39	3	8			39	2	8
40	2	6			40	2	6			40	2	5
41	2	6			41	4	7			41	2	7
42	2	5			42	3	5			42	2	9
43	2	5			43	2	7			43	2	7
44	2	6			44	3	9			44	3	8
45	2	5			45	3	6			45	3	10
46	2	7			46	2	5			46	2	9
47	2	5			47	3	5			47	2	8
48	2	6			48	3	6			48	4	9
49	2	9			49	2	8			49	2	5
50	2	7			50	3	5			50	3	7
51	2	9			51	3	7			51	3	8
52	2	6			52	2	7			52	3	6
53	2	5			53	3	8			53	3	6
54	2	7			54	3	7			54	2	7
55	3	8			55	3	6			55	2	9
56	3	7			56	3	8			56	2	7
57	3	5			57	4	7			57	2	5
58	2	7			58	3	9			58	3	7
59	3	7			59	2	8			59	3	8
60	2	6			60	4	9			60	3	7
61	3	5			61	3	8			61	2	9
62	3	8			62	3	6			62	3	5
63	2	7			63	3	7			63	3	6
64	2	6			64	4	9			64	2	7
65	2	5			65	3	5			65	2	5
66	2	6			66	2	7			66	2	9
67	2	4			67	4	10			67	3	10
68	2	7			68	3	9			68	2	9
69	2	7			69	3	7			69	3	8
70	2	5			70	3	6			70	3	7
71	2	6			71	2	5			71	2	7
72	2	5			72	3	6			72	3	8
73	3	7			73	2	5			73	2	6
74	2	5			74	4	6			74	2	5
75	2	6			75	3	7			75	3	7
76	2	5			76	2	6			76	2	7
77	2	5			77	3	7			77	3	5
78	3	8			78	3	5			78	2	5
79	2	4			79	3	8			79	3	6
80	3	7			80	3	6			80	2	5
81	2	6			81	3	9			81	2	5
82	3	7			82	3	6			82	2	7
83	3	5			83	3	6			83	2	5
84	2	7			84	4	8			84	2	6
85	2	6			85	2	6			85	2	6
86	3	7			86	2	5			86	2	5
87	2	5			87	3	6			87	2	6
					88	3	7			88	3	8
					89	3	7			89	2	9
					90	3	8			90	3	9
					91	4	8			91	2	7
					92	3	7			92	2	6
					93	3	5			93	2	5
					94	3	6			94	2	7
					95	2	5			95	3	8
					96	3	7			96	2	7
					97	3	9			97	2	8
										98	3	9
										99	2	7
										100	2	8

## Sheet: 2022_0619, 5d
Oregon-R #25211 (0 mM Auxin)					Oregon-R #25211 (10 mM Auxin)					VK00040 (0 mM Auxin)					VK00040 (10 mM Auxin)					AID (0 mM Auxin)					AID (10 mM Auxin)
GSC Counts		Cap Cell Counts			GSC Counts		Cap Cell Counts			GSC Counts		Cap Cell Counts			GSC Counts		Cap Cell Counts			GSC Counts		Cap Cell Counts			GSC Counts		Cap Cell Counts
Average	2.36923	Average	5.92308		Average	2.3	Average	5.76		Average	2.67742	Average	5.89247		Average	2.90476	Average	6.11905		Average	2.31579	Average	6.42105		Average	2.22222	Average	5.90278
Std. Dev.	0.546844	Std. Dev.	1.38415		Std. Dev.	0.543984	Std. Dev.	1.13497		Std. Dev.	0.554846	Std. Dev.	1.23766		Std. Dev.	0.484367	Std. Dev.	1.29167		Std. Dev.	0.602314	Std. Dev.	1.19444		Std. Dev.	0.481261	Std. Dev.	1.23516
4+	1	9+	3		4+	0	9+	0		4+	4	9+	1		4+	3	9+	1		4+	1	9+	1		4+	1	9+	1
3	23	7 to 8	18		3	17	7 to 8	15		3	55	7 to 8	32		3	32	7 to 8	15		3	19	7 to 8	26		3	15	7 to 8	22
2	40	5 to 6	35		2	31	5 to 6	29		2	34	5 to 6	50		2	7	5 to 6	24		2	34	5 to 6	29		2	55	5 to 6	42
0 to 1	1	3 to 4	9		0 to 1	2	3 to 4	6		0 to 1	0	3 to 4	10		0 to 1	0	3 to 4	2		0 to 1	3	3 to 4	1		0 to 1	1	3 to 4	7
Germ #	GSC #	CC #			Germ #	GSC #	CC #			Germ #	GSC #	CC #			Germ #	GSC #	CC #			Germ #	GSC #	CC #			Germ #	GSC #	CC #
1	2	5			1	3	5			1	2	5			1	3	7			1	2	5			1	2	5
2	3	8			2	3	6			2	3	7			2	2	5			2	3	7			2	2	6
3	2	7			3	1	4			3	2	4			3	3	8			3	2	8			3	2	7
4	3	7			4	2	7			4	2	5			4	3	5			4	3	7			4	2	5
5	2	6			5	2	5			5	2	8			5	3	5			5	3	8			5	3	6
6	2	5			6	3	6			6	2	7			6	3	5			6	2	7			6	3	5
7	2	7			7	2	5			7	3	7			7	2	9			7	3	6			7	2	5
8	2	6			8	2	4			8	2	5			8	2	5			8	2	5			8	2	6
9	2	9			9	3	5			9	3	5			9	3	8			9	2	8			9	3	7
10	2	5			10	2	7			10	3	7			10	3	7			10	2	5			10	2	5
11	3	6			11	2	6			11	3	6			11	3	7			11	1	6			11	2	6
12	1	4			12	3	7			12	3	7			12	3	5			12	2	6			12	2	7
13	2	5			13	2	4			13	3	8			13	3	8			13	3	7			13	3	8
14	2	7			14	3	6			14	3	7			14	3	6			14	2	5			14	3	7
15	3	9			15	3	6			15	3	7			15	3	8			15	3	5			15	2	6
16	3	9			16	3	5			16	3	7			16	4	7			16	2	6			16	2	7
17	2	4			17	2	5			17	3	6			17	3	5			17	2	5			17	2	5
18	2	5			18	3	5			18	3	5			18	3	7			18	3	7			18	2	7
19	2	4			19	2	6			19	3	5			19	3	6			19	2	8			19	2	5
20	2	5			20	2	7			20	2	5			20	2	4			20	3	5			20	2	8
21	2	7			21	3	5			21	2	6			21	3	5			21	2	4			21	3	6
22	3	5			22	2	5			22	3	5			22	3	6			22	2	5			22	2	5
23	3	8			23	2	7			23	3	7			23	2	6			23	2	5			23	3	9
24	2	5			24	2	5			24	2	7			24	3	5			24	3	7			24	2	6
25	2	4			25	2	4			25	4	8			25	4	8			25	3	8			25	3	8
26	3	6			26	2	6			26	3	7			26	3	5			26	2	6			26	2	5
27	2	5			27	2	7			27	2	4			27	3	7			27	2	5			27	2	8
28	2	4			28	2	5			28	3	5			28	2	4			28	2	6			28	2	5
29	2	5			29	3	7			29	3	5			29	3	5			29	2	7			29	2	7
30	2	6			30	2	6			30	2	4			30	3	7			30	3	8			30	2	5
31	3	6			31	3	8			31	3	4			31	3	6			31	2	6			31	3	5
32	2	4			32	2	5			32	3	6			32	3	5			32	4	8			32	2	5
33	2	7			33	2	4			33	3	7			33	3	5			33	2	7			33	2	6
34	3	6			34	2	5			34	2	5			34	2	6			34	2	8			34	2	5
35	2	7			35	2	7			35	3	7			35	3	5			35	2	7			35	2	4
36	3	8			36	2	6			36	2	5			36	3	8			36	2	5			36	3	5
37	2	5			37	2	6			37	2	5			37	3	6			37	2	7			37	4	8
38	2	4			38	1	4			38	3	6			38	3	5			38	2	5			38	2	5
39	3	6			39	2	5			39	3	5			39	3	7			39	3	9			39	2	4
40	2	5			40	2	7			40	2	4			40	3	5			40	3	8			40	3	6
41	2	6			41	2	5			41	3	5			41	4	8			41	3	6			41	2	7
42	2	4			42	2	6			42	3	5			42	3	6			42	2	5			42	2	4
43	2	4			43	3	7			43	2	4								43	3	7			43	2	7
44	3	8			44	2	5			44	3	6								44	2	6			44	2	5
45	3	5			45	2	5			45	3	5								45	1	6			45	1	4
46	2	6			46	3	7			46	3	8								46	2	7			46	2	5
47	3	6			47	3	7			47	3	6								47	1	5			47	3	7
48	2	5			48	3	8			48	2	4								48	2	6			48	2	8
49	2	7			49	3	8			49	2	5								49	3	8			49	2	5
50	3	5			50	2	5			50	2	6								50	2	6			50	2	5
51	3	5								51	2	4								51	3	7			51	2	6
52	2	5								52	3	6								52	2	6			52	2	6
53	3	7								53	3	7								53	2	5			53	2	5
54	2	5								54	2	4								54	2	6			54	2	7
55	2	6								55	3	5								55	3	8			55	2	5
56	2	8								56	2	4								56	3	7			56	2	6
57	3	5								57	3	6								57	2	8			57	3	8
58	4	8								58	2	5													58	2	7
59	3	7								59	3	5													59	2	5
60	2	5								60	2	5													60	2	7
61	3	7								61	3	7													61	2	4
62	2	8								62	3	6													62	2	6
63	2	6								63	3	5													63	2	4
64	3	6								64	4	8													64	2	5
65	3	5								65	3	5													65	2	6
										66	3	5													66	2	7
										67	2	6													67	2	8
										68	3	7													68	2	6
										69	3	7													69	2	4
										70	2	5													70	2	5
										71	2	7													71	3	5
										72	2	5													72	3	6
										73	3	8
										74	3	7
										75	3	8
										76	4	9
										77	2	5
										78	3	7
										79	3	6
										80	3	5
										81	3	7
										82	2	5
										83	3	6
										84	3	6
										85	2	5
										86	3	7
										87	3	6
										88	2	5
										89	4	7
										90	2	8
										91	2	5
										92	3	5
										93	3	8

## Sheet: 2022_0624, 10d
Oregon-R #25211 (0 mM Auxin)					Oregon-R #25211 (10 mM Auxin)					VK00040 (0 mM Auxin)					VK00040 (10 mM Auxin)					AID (0 mM Auxin)					AID (10 mM Auxin)
GSC Counts		Cap Cell Counts			GSC Counts		Cap Cell Counts			GSC Counts		Cap Cell Counts			GSC Counts		Cap Cell Counts			GSC Counts		Cap Cell Counts			GSC Counts		Cap Cell Counts
Average	2.21429	Average	7.03571		Average	2.275	Average	6.8		Average	2.66667	Average	7.38889		Average	2.61	Average	7.15		Average	2.35	Average	7.03		Average	2.35	Average	6.62
Std. Dev.	0.494121	Std. Dev.	1.37463		Std. Dev.	0.505736	Std. Dev.	1.38119		Std. Dev.	0.703123	Std. Dev.	1.46644		Std. Dev.	0.617833	Std. Dev.	1.32859		Std. Dev.	0.609272	Std. Dev.	1.48021		Std. Dev.	0.641573	Std. Dev.	1.27747
4+	0	9+	11		4+	0	9+	6		4+	11	9+	24		4+	6	9+	17		4+	2	9+	18		4+	1	9+	11
3	14	7 to 8	25		3	12	7 to 8	18		3	39	7 to 8	41		3	50	7 to 8	48		3	35	7 to 8	47		3	40	7 to 8	44
2	40	5 to 6	20		2	27	5 to 6	14		2	39	5 to 6	23		2	43	5 to 6	34		2	60	5 to 6	31		2	53	5 to 6	44
0 to 1	2	3 to 4	0		0 to 1	1	3 to 4	2		0 to 1	1	3 to 4	2		0 to 1	1	3 to 4	1		0 to 1	3	3 to 4	4		0 to 1	6	3 to 4	1
Germ #	GSC #	CC #			Germ #	GSC #	CC #			Germ #	GSC #	CC #			Germ #	GSC #	CC #			Germ #	GSC #	CC #			Germ #	GSC #	CC #
1	3	6			1	2	7			1	2	8			1	2	6			1	3	7			1	2	7
2	2	7			2	2	9			2	3	9			2	3	8			2	2	9			2	3	8
3	2	7			3	2	8			3	2	7			3	2	6			3	1	5			3	2	7
4	3	8			4	2	9			4	2	4			4	4	8			4	2	6			4	3	9
5	2	5			5	3	7			5	3	10			5	3	9			5	2	7			5	2	6
6	3	6			6	2	6			6	2	6			6	3	8			6	2	8			6	2	7
7	3	9			7	2	6			7	3	9			7	4	9			7	3	7			7	3	8
8	2	8			8	3	9			8	3	8			8	2	9			8	2	8			8	2	5
9	2	6			9	2	6			9	2	5			9	3	7			9	2	7			9	2	5
10	2	7			10	1	5			10	2	6			10	2	7			10	3	9			10	2	7
11	3	7			11	3	7			11	2	6			11	3	6			11	4	10			11	2	6
12	3	7			12	2	7			12	2	7			12	3	5			12	3	7			12	2	7
13	2	8			13	2	7			13	2	9			13	3	6			13	2	5			13	3	9
14	1	5			14	2	6			14	2	7			14	2	7			14	2	8			14	2	7
15	2	7			15	2	8			15	2	8			15	3	8			15	2	6			15	3	7
16	2	8			16	2	7			16	3	9			16	2	6			16	3	7			16	2	5
17	3	9			17	2	6			17	2	7			17	3	9			17	3	9			17	2	7
18	1	5			18	2	5			18	4	8			18	3	8			18	3	10			18	3	6
19	3	8			19	2	6			19	3	8			19	2	7			19	2	7			19	2	5
20	2	5			20	3	7			20	2	9			20	3	8			20	2	8			20	3	7
21	2	7			21	3	8			21	3	8			21	2	8			21	2	7			21	2	7
22	2	9			22	3	9			22	3	7			22	3	7			22	2	6			22	3	8
23	2	7			23	2	5			23	2	9			23	4	8			23	2	5			23	2	7
24	2	6			24	2	4			24	3	7			24	3	7			24	3	7			24	2	6
25	2	9			25	2	5			25	2	5			25	3	10			25	3	9			25	1	4
26	2	8			26	2	7			26	2	9			26	3	8			26	2	8			26	3	7
27	2	9			27	2	5			27	1	6			27	2	6			27	3	9			27	3	5
28	2	5			28	3	8			28	3	9			28	2	6			28	3	8			28	2	6
29	2	6			29	2	4			29	4	10			29	3	8			29	3	10			29	3	7
30	2	5			30	2	6			30	4	8			30	3	7			30	3	7			30	3	8
31	3	9			31	3	9			31	4	7			31	2	6			31	2	5			31	2	6
32	3	7			32	2	7			32	3	9			32	2	7			32	2	9			32	2	7
33	2	7			33	3	9			33	3	8			33	2	7			33	2	6			33	0	5
34	2	7			34	2	7			34	3	7			34	2	6			34	3	7			34	2	7
35	2	6			35	2	7			35	2	8			35	2	7			35	3	7			35	2	6
36	2	6			36	2	6			36	2	9			36	3	5			36	3	6			36	2	5
37	2	9			37	3	6			37	2	6			37	2	5			37	2	5			37	2	9
38	2	7			38	2	7			38	2	5			38	3	9			38	2	6			38	3	7
39	2	6			39	3	7			39	2	8			39	2	7			39	2	7			39	2	5
40	2	7			40	3	8			40	2	6			40	3	9			40	2	8			40	3	8
41	3	8								41	3	9			41	3	5			41	2	8			41	3	9
42	2	5								42	2	5			42	2	6			42	2	5			42	2	6
43	2	6								43	3	8			43	2	8			43	3	6			43	3	9
44	2	7								44	3	7			44	2	6			44	3	8			44	2	7
45	2	5								45	2	7			45	3	9			45	3	6			45	2	6
46	2	7								46	4	9			46	4	8			46	2	7			46	1	7
47	2	9								47	3	10			47	3	8			47	3	9			47	3	9
48	2	5								48	2	7			48	2	6			48	2	7			48	3	7
49	2	7								49	2	4			49	3	7			49	2	6			49	3	6
50	2	6								50	4	8			50	2	7			50	3	8			50	1	5
51	2	9								51	2	5			51	2	6			51	2	6			51	2	9
52	2	6								52	3	5			52	3	7			52	2	7			52	3	5
53	3	7								53	2	10			53	3	9			53	2	4			53	3	7
54	3	8								54	3	7			54	4	10			54	2	6			54	3	6
55	3	10								55	3	10			55	2	8			55	2	8			55	2	6
56	2	9								56	4	9			56	2	8			56	3	9			56	2	5
										57	2	8			57	3	9			57	2	7			57	2	7
										58	2	7			58	2	7			58	2	5			58	3	5
										59	4	9			59	3	8			59	3	8			59	2	5
										60	2	8			60	3	10			60	2	5			60	3	7
										61	3	9			61	2	6			61	2	7			61	3	6
										62	3	6			62	3	7			62	2	5			62	2	5
										63	3	8			63	2	7			63	2	9			63	2	5
										64	3	7			64	3	8			64	2	7			64	2	6
										65	3	9			65	3	6			65	2	6			65	2	7
										66	2	7			66	2	8			66	2	5			66	3	9
										67	3	7			67	3	7			67	2	9			67	3	7
										68	3	6			68	1	6			68	2	7			68	2	6
										69	3	6			69	2	6			69	2	9			69	1	5
										70	3	7			70	2	8			70	2	5			70	3	7
										71	3	6			71	4	8			71	2	4			71	3	7
										72	3	8			72	3	7			72	2	6			72	3	5
										73	2	8			73	2	6			73	2	7			73	1	7
										74	3	7			74	3	9			74	2	5			74	2	6
										75	2	5			75	3	8			75	2	6			75	2	6
										76	3	6			76	3	6			76	2	4			76	2	8
										77	3	6			77	2	9			77	2	7			77	2	5
										78	4	9			78	2	8			78	4	8			78	2	7
										79	2	7			79	3	7			79	2	6			79	3	5
										80	2	8			80	3	7			80	3	9			80	3	7
										81	3	7			81	2	4			81	3	7			81	3	5
										82	3	6			82	3	6			82	2	6			82	4	8
										83	3	8			83	2	9			83	2	8			83	2	7
										84	4	9			84	3	9			84	3	9			84	2	5
										85	2	7			85	2	6			85	2	5			85	2	7
										86	4	7			86	3	9			86	0	7			86	3	9
										87	3	6			87	3	6			87	2	6			87	2	6
										88	3	9			88	2	5			88	2	7			88	2	8
										89	2	5			89	3	7			89	3	8			89	2	6
										90	2	6			90	3	5			90	2	8			90	3	7
															91	2	6			91	3	9			91	2	8
															92	3	5			92	3	8			92	3	9
															93	2	5			93	1	7			93	3	8
															94	2	6			94	3	8			94	3	6
															95	3	8			95	2	4			95	2	5
															96	3	8			96	3	7			96	2	6
															97	3	7			97	3	8			97	3	5
															98	3	5			98	3	6			98	2	7
															99	2	7			99	3	10			99	2	7
															100	2	6			100	3	7			100	3	9

## Sheet: 2022_0629, 15d
Oregon-R #25211 (0 mM Auxin)					Oregon-R #25211 (10 mM Auxin)					VK00040 (0 mM Auxin)					VK00040 (10 mM Auxin)					AID (0 mM Auxin)					AID (10 mM Auxin)
GSC Counts		Cap Cell Counts			GSC Counts		Cap Cell Counts			GSC Counts		Cap Cell Counts			GSC Counts		Cap Cell Counts			GSC Counts		Cap Cell Counts			GSC Counts		Cap Cell Counts
Average	1.56897	Average	5.98276		Average	2	Average	5.75862		Average	2.45161	Average	6.6129		Average	2.30337	Average	7.1573		Average	2.24242	Average	6.66667		Average	2.34375	Average	6.75
Std. Dev.	0.77487	Std. Dev.	1.19195		Std. Dev.	0.418854	Std. Dev.	1.21843		Std. Dev.	0.561754	Std. Dev.	1.25137		Std. Dev.	0.50911	Std. Dev.	1.33909		Std. Dev.	0.656069	Std. Dev.	1.26168		Std. Dev.	0.662183	Std. Dev.	1.14248
4+	0	9+	1		4+	0	9+	1		4+	2	9+	7		4+	1	9+	16		4+	2	9+	7		4+	1	9+	6
3	3	7 to 8	20		3	5	7 to 8	14		3	39	7 to 8	44		3	26	7 to 8	45		3	30	7 to 8	47		3	40	7 to 8	50
2	34	5 to 6	33		2	48	5 to 6	34		2	51	5 to 6	40		2	61	5 to 6	27		2	57	5 to 6	43		2	46	5 to 6	39
0 to 1	21	3 to 4	4		0 to 1	5	3 to 4	9		0 to 1	1	3 to 4	2		0 to 1	1	3 to 4	1		0 to 1	10	3 to 4	2		0 to 1	9	3 to 4	1
Germ #	GSC #	CC #			Germ #	GSC #	CC #			Germ #	GSC #	CC #			Germ #	GSC #	CC #			Germ #	GSC #	CC #			Germ #	GSC #	CC #
1	1	7			1	2	8			1	3	7			1	3	10			1	3	8			1	2	7
2	3	8			2	2	7			2	2	8			2	2	5			2	2	5			2	2	6
3	1	7			3	3	8			3	2	5			3	2	5			3	2	7			3	3	7
4	1	7			4	2	6			4	3	7			4	2	5			4	2	6			4	2	6
5	2	6			5	2	7			5	2	6			5	2	6			5	3	9			5	2	6
6	2	8			6	2	6			6	3	7			6	2	7			6	2	6			6	4	7
7	1	5			7	3	5			7	2	8			7	2	7			7	3	8			7	3	9
8	2	6			8	2	5			8	2	5			8	3	7			8	4	9			8	3	6
9	2	7			9	2	6			9	3	5			9	3	6			9	1	6			9	3	8
10	2	7			10	3	6			10	3	7			10	2	9			10	3	7			10	3	7
11	1	6			11	1	4			11	3	7			11	2	8			11	2	7			11	2	4
12	2	7			12	2	6			12	3	5			12	3	9			12	3	8			12	3	5
13	2	7			13	2	7			13	2	7			13	2	7			13	3	7			13	3	8
14	2	8			14	2	5			14	3	5			14	2	6			14	1	6			14	2	7
15	1	6			15	2	4			15	3	5			15	2	8			15	2	6			15	3	9
16	0	6			16	2	5			16	3	6			16	3	8			16	2	5			16	2	6
17	2	4			17	3	9			17	3	9			17	2	6			17	2	7			17	2	7
18	0	5			18	2	7			18	2	5			18	3	7			18	2	4			18	2	5
19	2	5			19	2	6			19	2	5			19	2	8			19	2	5			19	2	5
20	0	3			20	2	5			20	2	6			20	2	9			20	2	6			20	2	8
21	2	6			21	2	6			21	2	5			21	2	5			21	2	5			21	2	6
22	2	5			22	2	6			22	3	6			22	4	9			22	2	6			22	3	7
23	2	7			23	2	5			23	3	6			23	2	7			23	2	7			23	3	8
24	0	5			24	2	5			24	4	7			24	3	6			24	2	7			24	1	9
25	1	5			25	2	4			25	2	5			25	2	7			25	2	5			25	3	9
26	2	7			26	2	5			26	2	6			26	2	6			26	2	4			26	3	6
27	0	6			27	2	5			27	2	9			27	3	7			27	3	7			27	3	5
28	2	5			28	3	5			28	2	7			28	2	8			28	2	5			28	2	5
29	1	4			29	2	5			29	2	6			29	3	9			29	2	8			29	3	7
30	0	7			30	2	7			30	2	5			30	3	8			30	2	9			30	2	5
31	2	8			31	2	8			31	2	8			31	3	9			31	1	5			31	2	5
32	3	6			32	2	7			32	3	7			32	3	8			32	2	6			32	3	8
33	0	5			33	2	6			33	2	6			33	3	9			33	2	8			33	2	5
34	2	5			34	2	5			34	3	8			34	2	10			34	3	8			34	3	6
35	2	6			35	2	7			35	2	7			35	2	8			35	2	7			35	1	6
36	2	7			36	2	5			36	2	5			36	3	7			36	3	9			36	1	7
37	1	5			37	1	5			37	2	6			37	2	6			37	3	8			37	3	8
38	2	6			38	2	6			38	3	9			38	3	7			38	3	6			38	1	5
39	1	5			39	2	7			39	3	8			39	3	8			39	3	10			39	2	8
40	2	6			40	2	6			40	3	6			40	2	6			40	1	7			40	2	5
41	2	7			41	2	6			41	3	8			41	2	5			41	3	6			41	2	6
42	2	5			42	2	5			42	2	4			42	2	7			42	2	6			42	2	7
43	2	6			43	2	7			43	2	7			43	2	7			43	2	9			43	2	7
44	2	5			44	2	6			44	3	6			44	3	8			44	2	5			44	3	8
45	2	5			45	2	4			45	2	6			45	2	8			45	3	6			45	2	6
46	1	7			46	2	5			46	2	4			46	2	7			46	1	7			46	2	8
47	2	5			47	1	4			47	1	6			47	2	9			47	3	6			47	3	7
48	2	5			48	2	6			48	2	8			48	2	9			48	1	7			48	3	6
49	2	9			49	2	8			49	2	5			49	3	8			49	2	5			49	3	7
50	2	7			50	2	6			50	3	7			50	2	7			50	1	7			50	3	6
51	1	4			51	2	4			51	2	8			51	2	6			51	2	7			51	3	7
52	1	5			52	2	6			52	2	7			52	2	7			52	1	7			52	2	6
53	2	5			53	2	4			53	3	8			53	2	8			53	2	5			53	2	6
54	2	5			54	2	5			54	3	7			54	2	9			54	2	6			54	3	7
55	1	7			55	2	4			55	2	5			55	3	8			55	3	7			55	3	7
56	3	6			56	1	6			56	3	9			56	2	8			56	3	8			56	2	5
57	2	6			57	1	4			57	2	6			57	2	6			57	2	6			57	3	8
58	2	7			58	2	7			58	3	7			58	3	7			58	3	7			58	3	6
										59	2	6			59	2	6			59	2	7			59	3	7
										60	2	5			60	2	6			60	1	6			60	3	8
										61	2	9			61	2	9			61	1	8			61	3	9
										62	2	6			62	2	6			62	2	6			62	3	6
										63	2	7			63	3	5			63	2	10			63	2	6
										64	3	8			64	2	8			64	2	8			64	2	8
										65	3	7			65	2	7			65	2	7			65	3	7
										66	3	9			66	2	5			66	2	7			66	3	7
										67	2	6			67	2	7			67	2	6			67	3	8
										68	3	7			68	3	9			68	3	8			68	3	9
										69	3	7			69	2	8			69	2	6			69	2	8
										70	3	6			70	2	7			70	3	7			70	1	7
										71	2	8			71	3	7			71	2	7			71	2	8
										72	2	5			72	2	6			72	2	6			72	2	6
										73	2	5			73	2	9			73	3	6			73	1	5
										74	2	5			74	2	8			74	2	7			74	2	6
										75	2	7			75	2	5			75	2	6			75	2	6
										76	2	7			76	1	4			76	3	8			76	2	7
										77	3	8			77	3	8			77	2	7			77	3	7
										78	2	7			78	2	7			78	3	8			78	2	5
										79	2	6			79	2	6			79	2	8			79	3	6
										80	3	7			80	2	6			80	2	5			80	2	7
										81	2	8			81	3	5			81	3	7			81	2	6
										82	3	7			82	3	7			82	2	5			82	2	7
										83	2	7			83	2	7			83	2	7			83	3	8
										84	3	6			84	2	8			84	2	5			84	2	7
										85	2	7			85	2	7			85	2	5			85	1	7
										86	3	7			86	2	9			86	3	7			86	2	8
										87	3	8			87	2	6			87	2	6			87	1	8
										88	3	9			88	2	5			88	3	8			88	2	7
										89	4	7			89	2	7			89	2	7			89	2	6
										90	2	6								90	4	8			90	3	7
										91	3	8								91	2	5			91	2	7
										92	2	7								92	3	5			92	2	6
										93	2	5								93	3	7			93	3	8
																				94	3	6			94	2	6
																				95	2	6			95	2	7
																				96	3	5			96	1	7
																				97	2	6
																				98	2	8
																				99	2	7

## Sheet: 2022_0812, 0d
Oregon-R #25211					VK00040					AID
GSC Counts		Cap Cell Counts			GSC Counts		Cap Cell Counts			GSC Counts		Cap Cell Counts
Average	2.38776	Average	5.92857		Average	3.12632	Average	6.10526		Average	2.36471	Average	6.2
Std. Dev.	0.619821	Std. Dev.	1.24561		Std. Dev.	0.510363	Std. Dev.	1.19817		Std. Dev.	0.614256	Std. Dev.	1.30749
4+	3	9+	4		4+	17	9+	3		4+	0	9+	4
3	35	7 to 8	29		3	72	7 to 8	33		3	36	7 to 8	29
2	58	5 to 6	56		2	6	5 to 6	55		2	45	5 to 6	49
0 to 1	2	3 to 4	9		0 to 1	0	3 to 4	4		0 to 1	4	3 to 4	3
Germ #	GSC #	CC #			Germ #	GSC #	CC #			Germ #	GSC #	CC #
1	2	7			1	3	5			1	3	7
2	2	6			2	4	7			2	2	5
3	3	5			3	4	6			3	3	5
4	4	6			4	4	5			4	3	6
5	2	7			5	3	6			5	2	5
6	3	6			6	3	4			6	3	5
7	2	5			7	3	5			7	3	8
8	2	7			8	3	6			8	3	7
9	2	4			9	3	6			9	3	5
10	2	6			10	3	7			10	1	4
11	3	5			11	3	5			11	2	5
12	2	5			12	3	6			12	2	6
13	2	5			13	3	7			13	3	6
14	3	6			14	3	5			14	3	8
15	3	7			15	3	6			15	2	6
16	3	6			16	4	7			16	2	6
17	3	8			17	5	8			17	2	4
18	2	5			18	3	5			18	3	7
19	2	6			19	3	5			19	2	5
20	0	5			20	3	7			20	2	7
21	1	7			21	3	6			21	3	7
22	2	8			22	3	5			22	3	6
23	3	7			23	3	5			23	3	9
24	3	6			24	2	4			24	2	8
25	2	7			25	3	5			25	2	5
26	2	5			26	3	7			26	2	7
27	3	9			27	4	9			27	2	7
28	3	7			28	4	6			28	3	5
29	2	9			29	3	7			29	2	5
30	3	6			30	3	5			30	2	5
31	3	9			31	3	5			31	2	6
32	4	6			32	3	5			32	0	5
33	3	7			33	3	7			33	2	8
34	3	7			34	3	7			34	2	5
35	3	7			35	3	6			35	3	8
36	3	8			36	3	7			36	2	5
37	2	7			37	3	7			37	2	5
38	2	6			38	3	8			38	3	9
39	3	5			39	3	5			39	3	5
40	3	6			40	4	8			40	3	8
41	2	5			41	4	9			41	3	5
42	3	7			42	3	7			42	3	5
43	2	5			43	3	5			43	3	8
44	2	7			44	4	7			44	2	6
45	3	7			45	3	7			45	2	8
46	2	7			46	3	8			46	2	5
47	2	5			47	2	4			47	2	5
48	2	6			48	3	5			48	2	6
49	3	6			49	3	5			49	3	7
50	2	5			50	3	6			50	3	8
51	2	5			51	3	7			51	3	6
52	3	5			52	3	8			52	3	5
53	2	5			53	3	5			53	3	5
54	2	6			54	4	6			54	3	7
55	2	5			55	3	5			55	3	8
56	3	7			56	3	5			56	2	5
57	2	5			57	3	6			57	2	6
58	3	8			58	2	7			58	2	7
59	3	7			59	3	7			59	2	6
60	2	4			60	3	8			60	3	5
61	2	5			61	3	6			61	2	7
62	2	7			62	3	5			62	2	5
63	3	5			63	3	8			63	2	6
64	3	6			64	4	6			64	1	4
65	3	5			65	3	8			65	2	5
66	3	5			66	2	6			66	3	7
67	2	5			67	3	5			67	3	9
68	2	4			68	2	4			68	3	8
69	2	5			69	3	5			69	3	7
70	2	4			70	3	6			70	2	5
71	3	8			71	3	6			71	2	5
72	3	6			72	2	7			72	1	6
73	2	7			73	3	6			73	2	8
74	3	5			74	3	5			74	2	9
75	2	4			75	3	6			75	2	5
76	2	5			76	3	5			76	3	7
77	2	5			77	3	5			77	2	6
78	2	4			78	3	5			78	2	6
79	2	4			79	4	6			79	3	8
80	2	4			80	4	5			80	3	5
81	2	5			81	3	6			81	2	6
82	2	5			82	3	8			82	2	7
83	2	6			83	3	7			83	2	7
84	2	5			84	3	5			84	2	5
85	2	4			85	3	5			85	2	6
86	2	5			86	4	7
87	3	7			87	3	6
88	4	9			88	3	7
89	3	7			89	3	7
90	2	6			90	4	9
91	2	6			91	3	5
92	2	5			92	4	7
93	2	5			93	3	5
94	2	6			94	3	7
95	2	7			95	3	5
96	2	5
97	2	7
98	2	5

## Sheet: 2022_0817, 5d
Oregon-R #25211 (0 mM Auxin)					Oregon-R #25211 (10 mM Auxin)					VK00040 (0 mM Auxin)					VK00040 (10 mM Auxin)					AID (0 mM Auxin)					AID (10 mM Auxin)
GSC Counts		Cap Cell Counts			GSC Counts		Cap Cell Counts			GSC Counts		Cap Cell Counts			GSC Counts		Cap Cell Counts			GSC Counts		Cap Cell Counts			GSC Counts		Cap Cell Counts
Average	2.39394	Average	6.22727		Average	2.29851	Average	5.8806		Average	2.64615	Average	5.95385		Average	2.82759	Average	6.05172		Average	2.18056	Average	5.43056		Average	2.27397	Average	5.91781
Std. Dev.	0.551328	Std. Dev.	1.26242		Std. Dev.	0.522666	Std. Dev.	1.26158		Std. Dev.	0.597672	Std. Dev.	1.12404		Std. Dev.	0.566241	Std. Dev.	1.17611		Std. Dev.	0.564848	Std. Dev.	1.00459		Std. Dev.	0.533861	Std. Dev.	1.11497
4+	2	9+	2		4+	1	9+	2		4+	4	9+	0		4+	5	9+	2		4+	0	9+	0		4+	0	9+	1
3	22	7 to 8	25		3	19	7 to 8	17		3	34	7 to 8	23		3	38	7 to 8	19		3	19	7 to 8	12		3	23	7 to 8	21
2	42	5 to 6	35		2	46	5 to 6	42		2	27	5 to 6	38		2	15	5 to 6	33		2	47	5 to 6	49		2	47	5 to 6	46
0 to 1	0	3 to 4	4		0 to 1	1	3 to 4	6		0 to 1	0	3 to 4	4		0 to 1	0	3 to 4	4		0 to 1	6	3 to 4	11		0 to 1	3	3 to 4	5
Germ #	GSC #	CC #			Germ #	GSC #	CC #			Germ #	GSC #	CC #			Germ #	GSC #	CC #			Germ #	GSC #	CC #			Germ #	GSC #	CC #
1	3	5			1	3	8			1	3	5			1	2	5			1	1	5			1	2	5
2	3	7			2	2	7			2	2	6			2	4	6			2	2	8			2	2	6
3	3	9			3	2	5			3	3	5			3	4	6			3	3	5			3	2	4
4	2	6			4	2	5			4	2	7			4	3	7			4	1	7			4	2	7
5	3	7			5	2	9			5	3	8			5	2	7			5	2	5			5	2	5
6	3	5			6	2	5			6	3	7			6	2	6			6	2	6			6	2	6
7	2	5			7	2	6			7	3	8			7	3	6			7	3	8			7	2	8
8	2	6			8	3	7			8	4	7			8	3	7			8	3	7			8	3	5
9	3	8			9	2	4			9	3	5			9	2	4			9	3	6			9	3	5
10	2	7			10	2	7			10	3	7			10	3	8			10	2	5			10	3	6
11	2	8			11	2	8			11	3	5			11	3	5			11	2	5			11	2	4
12	2	6			12	2	5			12	2	5			12	3	7			12	2	5			12	1	6
13	2	8			13	2	5			13	2	4			13	3	7			13	3	6			13	2	5
14	2	5			14	2	6			14	2	6			14	2	5			14	1	5			14	3	6
15	3	7			15	2	5			15	4	8			15	3	7			15	2	4			15	2	7
16	4	8			16	2	5			16	4	7			16	3	8			16	3	6			16	3	6
17	3	6			17	2	5			17	3	6			17	2	7			17	2	5			17	3	7
18	2	7			18	2	7			18	3	5			18	3	9			18	2	4			18	3	7
19	2	7			19	2	6			19	3	5			19	3	6			19	2	4			19	2	5
20	3	6			20	1	5			20	2	7			20	3	7			20	3	5			20	3	6
21	2	6			21	2	8			21	3	5			21	3	5			21	2	5			21	2	7
22	3	8			22	3	9			22	3	6			22	3	6			22	3	7			22	2	6
23	2	7			23	3	8			23	3	7			23	3	7			23	3	5			23	3	5
24	3	6			24	2	6			24	3	5			24	3	8			24	3	7			24	2	7
25	2	6			25	2	5			25	2	5			25	3	6			25	1	4			25	3	6
26	3	7			26	2	6			26	2	6			26	3	6			26	2	5			26	3	7
27	2	8			27	2	8			27	3	5			27	3	7			27	2	5			27	1	5
28	2	5			28	2	6			28	3	6			28	3	6			28	2	5			28	2	6
29	3	7			29	2	6			29	3	7			29	3	5			29	2	6			29	2	6
30	3	7			30	3	7			30	2	6			30	2	4			30	2	5			30	2	5
31	2	9			31	2	4			31	2	4			31	3	6			31	2	6			31	2	5
32	2	6			32	3	6			32	2	6			32	4	7			32	1	4			32	3	8
33	2	5			33	2	4			33	2	5			33	3	5			33	2	6			33	2	7
34	2	4			34	3	5			34	2	6			34	3	7			34	2	5			34	3	5
35	2	6			35	3	6			35	3	7			35	3	5			35	2	4			35	2	6
36	2	5			36	2	5			36	2	5			36	3	5			36	2	5			36	2	5
37	2	4			37	2	4			37	2	7			37	2	4			37	2	7			37	2	6
38	2	5			38	3	5			38	3	5			38	4	9			38	2	5			38	2	5
39	3	6			39	3	8			39	2	8			39	3	5			39	2	5			39	3	9
40	3	7			40	3	5			40	2	5			40	2	5			40	3	6			40	2	5
41	3	5			41	2	5			41	2	6			41	2	5			41	3	7			41	3	8
42	2	4			42	3	7			42	3	7			42	3	6			42	2	5			42	2	6
43	3	7			43	2	5			43	3	7			43	3	7			43	2	5			43	2	7
44	2	5			44	2	5			44	3	5			44	3	6			44	3	5			44	3	6
45	2	7			45	2	6			45	2	7			45	3	7			45	2	6			45	3	8
46	4	8			46	2	5			46	4	8			46	2	7			46	2	5			46	2	7
47	2	5			47	3	5			47	3	8			47	2	6			47	2	6			47	2	5
48	2	6			48	2	6			48	2	4			48	3	5			48	1	4			48	2	7
49	3	8			49	2	5			49	2	5			49	3	6			49	2	5			49	3	5
50	2	7			50	2	6			50	3	7			50	2	5			50	2	4			50	2	5
51	2	6			51	3	7			51	3	7			51	3	5			51	2	5			51	2	6
52	2	5			52	2	5			52	3	6			52	3	5			52	2	6			52	2	5
53	2	5			53	2	4			53	3	5			53	3	4			53	3	6			53	2	6
54	2	5			54	2	5			54	2	5			54	2	6			54	2	5			54	2	5
55	2	7			55	2	7			55	2	5			55	4	6			55	2	5			55	3	7
56	3	6			56	3	6			56	3	7			56	2	5			56	3	7			56	2	5
57	3	8			57	3	5			57	3	5			57	3	5			57	3	5			57	2	4
58	2	5			58	2	6			58	2	6			58	3	7			58	2	4			58	3	6
59	2	4			59	2	5			59	2	4								59	3	7			59	2	5
60	2	5			60	3	8			60	3	7								60	2	6			60	3	7
61	2	6			61	2	6			61	3	6								61	2	5			61	2	8
62	2	5			62	3	5			62	3	5								62	2	5			62	2	6
63	3	8			63	2	6			63	2	5								63	2	4			63	2	7
64	2	6			64	2	5			64	2	5								64	2	5			64	2	6
65	2	5			65	2	4			65	3	6								65	3	6			65	3	5
66	2	6			66	4	7													66	2	7			66	2	6
					67	3	7													67	2	6			67	3	7
																				68	2	4			68	2	7
																				69	2	5			69	2	5
																				70	2	6			70	2	4
																				71	3	7			71	1	5
																				72	2	5			72	2	4
																									73	2	5

## Sheet: 2022_0822, 10d
Oregon-R #25211 (0 mM Auxin)					Oregon-R #25211 (10 mM Auxin)					VK00040 (0 mM Auxin)					VK00040 (10 mM Auxin)					AID (0 mM Auxin)					AID (10 mM Auxin)
GSC Counts		Cap Cell Counts			GSC Counts		Cap Cell Counts			GSC Counts		Cap Cell Counts			GSC Counts		Cap Cell Counts			GSC Counts		Cap Cell Counts			GSC Counts		Cap Cell Counts
Average	2.20312	Average	5.84375		Average	2.41379	Average	7.13793		Average	2.71429	Average	7		Average	2.65217	Average	6.91304		Average	2.15556	Average	5.8		Average	2.15556	Average	6.4
Std. Dev.	0.539832	Std. Dev.	1.17133		Std. Dev.	0.568032	Std. Dev.	1.43238		Std. Dev.	0.560612	Std. Dev.	1.48324		Std. Dev.	0.572768	Std. Dev.	1.27611		Std. Dev.	0.562283	Std. Dev.	1.09959		Std. Dev.	0.424026	Std. Dev.	1.32116
4+	0	9+	1		4+	0	9+	6		4+	1	9+	4		4+	1	9+	3		4+	0	9+	0		4+	0	9+	3
3	17	7 to 8	18		3	13	7 to 8	12		3	13	7 to 8	9		3	13	7 to 8	10		3	11	7 to 8	13		3	8	7 to 8	17
2	43	5 to 6	38		2	15	5 to 6	11		2	7	5 to 6	8		2	9	5 to 6	10		2	30	5 to 6	28		2	36	5 to 6	23
0 to 1	4	3 to 4	7		0 to 1	1	3 to 4	0		0 to 1	0	3 to 4	0		0 to 1	0	3 to 4	0		0 to 1	4	3 to 4	4		0 to 1	1	3 to 4	2
Germ #	GSC #	CC #			Germ #	GSC #	CC #			Germ #	GSC #	CC #			Germ #	GSC #	CC #			Germ #	GSC #	CC #			Germ #	GSC #	CC #
1	2	6			1	2	5			1	2	5			1	2	6			1	2	6			1	1	6
2	2	5			2	2	7			2	4	7			2	3	5			2	2	5			2	3	5
3	2	6			3	2	6			3	3	7			3	3	6			3	2	7			3	2	8
4	2	5			4	3	8			4	3	6			4	4	7			4	2	6			4	2	6
5	1	4			5	2	8			5	2	5			5	3	9			5	2	5			5	2	8
6	2	5			6	3	7			6	3	8			6	3	8			6	2	4			6	2	5
7	3	6			7	2	8			7	2	7			7	3	9			7	2	4			7	3	7
8	2	7			8	2	9			8	2	5			8	3	6			8	2	6			8	3	6
9	2	5			9	3	8			9	3	10			9	3	6			9	3	7			9	3	7
10	2	6			10	2	9			10	3	9			10	2	7			10	2	5			10	2	5
11	2	8			11	2	8			11	3	8			11	2	8			11	2	7			11	2	5
12	1	4			12	1	5			12	3	9			12	3	7			12	3	8			12	3	5
13	2	7			13	2	6			13	3	7			13	3	8			13	2	5			13	2	7
14	2	5			14	2	5			14	2	9			14	2	7			14	2	7			14	2	5
15	3	5			15	2	7			15	3	6			15	2	5			15	2	6			15	2	7
16	3	5			16	3	5			16	3	5			16	2	6			16	2	5			16	2	6
17	2	6			17	3	9			17	3	6			17	3	8			17	2	5			17	3	5
18	2	5			18	2	6			18	3	7			18	3	7			18	2	7			18	2	4
19	2	4			19	2	8			19	2	6			19	2	5			19	3	7			19	2	8
20	1	5			20	3	6			20	3	8			20	2	6			20	2	6			20	2	6
21	2	7			21	2	7			21	2	7			21	3	9			21	2	8			21	2	9
22	2	8			22	3	6								22	2	6			22	2	7			22	2	8
23	2	6			23	3	9								23	3	8			23	3	5			23	2	9
24	3	5			24	2	5													24	2	5			24	2	6
25	3	6			25	3	8													25	1	4			25	2	6
26	2	4			26	3	6													26	3	7			26	2	8
27	3	5			27	3	9													27	2	5			27	3	7
28	1	7			28	3	8													28	2	6			28	2	5
29	2	7			29	3	9													29	2	6			29	2	8
30	2	6																		30	2	5			30	2	6
31	3	8																		31	2	7			31	2	7
32	2	5																		32	3	6			32	2	5
33	2	6																		33	2	5			33	2	6
34	2	7																		34	3	7			34	2	5
35	2	6																		35	2	5			35	2	7
36	3	5																		36	1	5			36	2	5
37	3	7																		37	1	4			37	2	7
38	3	6																		38	1	6			38	2	6
39	2	5																		39	3	5			39	2	7
40	3	7																		40	3	8			40	2	9
41	2	4																		41	3	6			41	2	6
42	3	6																		42	3	5			42	3	6
43	3	7																		43	2	5			43	2	4
44	2	5																		44	2	6			44	2	8
45	2	5																		45	2	5			45	2	7
46	2	6
47	2	6
48	2	4
49	2	7
50	2	5
51	2	5
52	3	7
53	2	4
54	2	5
55	2	6
56	2	6
57	2	7
58	2	5
59	3	9
60	2	6
61	2	7
62	3	5
63	3	8
64	2	7

## Sheet: 2022_0827, 15d
Oregon-R #25211 (0 mM Auxin)					Oregon-R #25211 (10 mM Auxin)					VK00040 (0 mM Auxin)					VK00040 (10 mM Auxin)					AID (0 mM Auxin)					AID (10 mM Auxin)
GSC Counts		Cap Cell Counts			GSC Counts		Cap Cell Counts			GSC Counts		Cap Cell Counts			GSC Counts		Cap Cell Counts			GSC Counts		Cap Cell Counts			GSC Counts		Cap Cell Counts
Average	2.04	Average	5.86		Average	2.33333	Average	6.14286		Average	2.48571	Average	6.57143		Average	2.72727	Average	6.69697		Average	1.97059	Average	6.14706		Average	2.125	Average	5.91667
Std. Dev.	0.604743	Std. Dev.	1.16075		Std. Dev.	0.57735	Std. Dev.	1.35225		Std. Dev.	0.612201	Std. Dev.	1.3781		Std. Dev.	0.57406	Std. Dev.	1.57092		Std. Dev.	0.717119	Std. Dev.	1.0483		Std. Dev.	0.63998	Std. Dev.	1.06857
4+	0	9+	0		4+	1	9+	1		4+	1	9+	4		4+	2	9+	5		4+	0	9+	0		4+	0	9+	0
3	10	7 to 8	14		3	5	7 to 8	7		3	16	7 to 8	15		3	20	7 to 8	11		3	6	7 to 8	13		3	12	7 to 8	17
2	32	5 to 6	32		2	15	5 to 6	12		2	17	5 to 6	15		2	11	5 to 6	17		2	23	5 to 6	21		2	31	5 to 6	27
0 to 1	8	3 to 4	4		0 to 1	0	3 to 4	1		0 to 1	1	3 to 4	1		0 to 1	0	3 to 4	0		0 to 1	5	3 to 4	0		0 to 1	5	3 to 4	4
Germ #	GSC #	CC #			Germ #	GSC #	CC #			Germ #	GSC #	CC #			Germ #	GSC #	CC #			Germ #	GSC #	CC #			Germ #	GSC #	CC #
1	2	5			1	2	7			1	2	6			1	3	9			1	2	7			1	2	5
2	2	7			2	2	5			2	3	7			2	3	8			2	0	6			2	2	7
3	2	7			3	2	5			3	3	5			3	2	6			3	2	7			3	2	6
4	2	8			4	2	6			4	3	7			4	3	8			4	3	7			4	2	5
5	1	5			5	3	8			5	3	7			5	3	6			5	2	5			5	2	7
6	2	6			6	2	6			6	4	9			6	2	7			6	2	5			6	2	6
7	1	5			7	3	6			7	3	7			7	2	5			7	2	6			7	3	6
8	2	8			8	2	5			8	2	6			8	3	5			8	2	5			8	1	4
9	1	4			9	3	5			9	3	9			9	3	9			9	2	5			9	2	7
10	3	8			10	3	8			10	2	5			10	4	8			10	2	8			10	2	5
11	2	5			11	4	8			11	2	5			11	3	8			11	2	6			11	2	5
12	2	5			12	2	7			12	3	8			12	2	7			12	3	7			12	2	5
13	1	5			13	2	5			13	3	8			13	3	5			13	2	6			13	2	6
14	1	4			14	2	4			14	3	7			14	3	5			14	3	6			14	3	7
15	2	5			15	2	7			15	2	7			15	3	8			15	2	5			15	2	5
16	2	6			16	3	5			16	2	5			16	3	7			16	2	5			16	2	7
17	2	7			17	2	9			17	3	7			17	3	6			17	2	5			17	2	6
18	2	6			18	2	5			18	2	6			18	3	5			18	3	7			18	2	5
19	2	5			19	2	5			19	2	5			19	2	5			19	1	6			19	2	4
20	1	5			20	2	6			20	2	5			20	3	9			20	0	7			20	3	5
21	2	6			21	2	7			21	3	6			21	3	7			21	2	6			21	2	7
22	1	4								22	2	5			22	3	6			22	3	8			22	2	6
23	2	4								23	3	5			23	3	10			23	1	5			23	3	7
24	2	7								24	3	7			24	3	6			24	2	5			24	3	6
25	2	5								25	2	7			25	2	5			25	2	8			25	2	5
26	2	6								26	3	5			26	3	5			26	2	6			26	2	5
27	2	6								27	2	8			27	2	6			27	2	5			27	2	7
28	2	7								28	2	7			28	2	5			28	2	7			28	3	5
29	2	5								29	2	7			29	4	10			29	2	6			29	2	6
30	3	8								30	3	9			30	2	6			30	3	8			30	3	7
31	3	5								31	2	6			31	2	7			31	2	5			31	3	7
32	2	5								32	2	8			32	3	7			32	1	5			32	0	5
33	2	6								33	3	9			33	2	5			33	2	7			33	1	4
34	2	5								34	1	4								34	2	7			34	2	6
35	3	7								35	2	6													35	3	7
36	2	6																							36	3	8
37	2	8																							37	2	5
38	3	6																							38	2	8
39	3	7																							39	1	4
40	3	8																							40	2	6
41	3	6																							41	3	7
42	2	5																							42	2	7
43	2	6																							43	1	6
44	3	5																							44	3	6
45	2	5																							45	2	5
46	2	6																							46	2	7
47	3	5																							47	2	5
48	2	7																							48	2	7
49	2	5
50	1	6

## Sheet: 2022_1007, 0d
Oregon-R #25211					VK00040					AID
GSC Counts		Cap Cell Counts			GSC Counts		Cap Cell Counts			GSC Counts		Cap Cell Counts
Average	2.42029	Average	6.33333		Average	3.01	Average	6.36		Average	2.27	Average	6.4
Std. Dev.	0.55322	Std. Dev.	1.33578		Std. Dev.	0.611258	Std. Dev.	1.45311		Std. Dev.	0.565953	Std. Dev.	1.38535
4+	1	9+	5		4+	17	9+	10		4+	1	9+	7
3	28	7 to 8	27		3	66	7 to 8	35		3	30	7 to 8	39
2	39	5 to 6	34		2	17	5 to 6	51		2	64	5 to 6	50
0 to 1	1	3 to 4	3		0 to 1	0	3 to 4	4		0 to 1	5	3 to 4	4
Germ #	GSC #	CC #			Germ #	GSC #	CC #			Germ #	GSC #	CC #
1	2	9			1	3	7			1	1	4
2	3	8			2	3	6			2	2	6
3	2	7			3	3	5			3	3	5
4	2	6			4	4	7			4	2	5
5	3	8			5	3	5			5	2	6
6	2	7			6	3	6			6	2	7
7	3	7			7	3	7			7	2	8
8	2	6			8	3	5			8	2	6
9	3	6			9	4	9			9	3	8
10	3	8			10	3	5			10	3	5
11	2	6			11	4	8			11	2	7
12	2	7			12	4	7			12	2	5
13	2	5			13	2	5			13	3	7
14	3	9			14	3	6			14	3	5
15	2	7			15	3	6			15	3	5
16	3	5			16	4	7			16	2	7
17	1	4			17	2	5			17	2	9
18	2	5			18	3	5			18	2	6
19	2	5			19	2	5			19	2	8
20	3	8			20	3	9			20	3	5
21	2	7			21	2	4			21	2	6
22	2	7			22	3	5			22	3	10
23	2	8			23	3	8			23	2	8
24	3	8			24	4	9			24	3	5
25	3	5			25	3	8			25	2	6
26	2	5			26	3	7			26	3	8
27	2	5			27	2	6			27	2	5
28	2	7			28	3	7			28	3	7
29	2	5			29	3	7			29	3	6
30	3	6			30	3	9			30	3	8
31	2	6			31	3	6			31	3	9
32	2	5			32	2	5			32	3	8
33	3	7			33	4	7			33	1	4
34	3	5			34	3	5			34	2	7
35	2	5			35	3	5			35	2	6
36	3	8			36	3	5			36	2	5
37	4	9			37	3	6			37	2	6
38	3	5			38	4	8			38	3	5
39	3	5			39	3	6			39	2	6
40	3	6			40	3	7			40	2	5
41	3	7			41	3	5			41	2	7
42	2	7			42	3	7			42	2	5
43	3	7			43	4	8			43	2	7
44	2	6			44	3	5			44	2	4
45	3	6			45	3	7			45	3	6
46	3	7			46	3	5			46	2	8
47	2	5			47	3	5			47	2	5
48	2	6			48	4	8			48	2	6
49	3	8			49	3	9			49	2	5
50	3	6			50	2	5			50	3	8
51	2	7			51	2	6			51	1	4
52	2	5			52	2	5			52	3	9
53	3	7			53	3	4			53	2	5
54	2	6			54	3	6			54	2	7
55	2	7			55	2	4			55	2	7
56	3	7			56	3	6			56	3	8
57	2	5			57	3	5			57	2	6
58	2	6			58	3	5			58	3	8
59	2	5			59	3	6			59	2	5
60	3	7			60	3	8			60	3	7
61	2	5			61	2	5			61	2	8
62	2	9			62	2	5			62	2	6
63	2	4			63	3	5			63	2	6
64	2	5			64	4	8			64	3	7
65	2	9			65	4	9			65	2	5
66	3	5			66	3	7			66	2	5
67	2	4			67	2	5			67	3	7
68	2	5			68	4	8			68	2	5
69	3	7			69	3	5			69	1	8
					70	3	5			70	2	7
					71	2	6			71	2	6
					72	3	5			72	2	7
					73	3	5			73	4	9
					74	3	8			74	2	7
					75	3	5			75	3	7
					76	3	7			76	2	5
					77	3	5			77	2	5
					78	3	8			78	2	6
					79	2	6			79	2	9
					80	3	8			80	2	5
					81	3	7			81	2	7
					82	4	9			82	3	8
					83	3	7			83	2	5
					84	3	5			84	2	5
					85	3	4			85	1	5
					86	5	7			86	3	7
					87	3	8			87	3	5
					88	4	9			88	3	8
					89	3	8			89	2	5
					90	3	9			90	2	6
					91	3	9			91	2	7
					92	3	7			92	2	7
					93	4	6			93	2	8
					94	2	5			94	2	7
					95	2	7			95	2	5
					96	3	5			96	2	6
					97	3	5			97	2	8
					98	3	7			98	2	6
					99	3	8			99	3	9
					100	3	5			100	2	5

## Sheet: 2022_1012, 5d
Oregon-R 0 mM auxin					Oregon-R 10 mM auxin					VK00040 0 mM auxin					VK00040 10 mM auxin					AID-tub-AID 0 mM auxin					AID-tub-AID 10 mM auxin
GSC Counts		Cap Cell Counts			GSC Counts		Cap Cell Counts			GSC Counts		Cap Cell Counts			GSC Counts		Cap Cell Counts			GSC Counts		Cap Cell Counts			GSC Counts		Cap Cell Counts
Average	2.47	Average	7.6		Average	2.37	Average	7.47		Average	2.62	Average	8.16		Average	2.66	Average	8.21		Average	2.33	Average	7.84		Average	2.21	Average	7.64
Std. Dev.	0.501614	Std. Dev.	1.02494		Std. Dev.	0.613896	Std. Dev.	1.14111		Std. Dev.	0.54643	Std. Dev.	1.10755		Std. Dev.	0.535978	Std. Dev.	1.15728		Std. Dev.	0.652191	Std. Dev.	1.24495		Std. Dev.	0.655898	Std. Dev.	1.24333
4+	0	9+	18		4+	0	9+	20		4+	3	9+	36		4+	3	9+	42		4+	0	9+	31		4+	0	9+	25
3	47	7 to 8	70		3	44	7 to 8	61		3	56	7 to 8	60		3	60	7 to 8	54		3	43	7 to 8	57		3	34	7 to 8	56
2	53	5 to 6	12		2	49	5 to 6	19		2	41	5 to 6	4		2	37	5 to 6	4		2	47	5 to 6	12		2	53	5 to 6	19
0 to 1	0	3 to 4	0		0 to 1	7	3 to 4	0		0 to 1	0	3 to 4	0		0 to 1	0	3 to 4	0		0 to 1	10	3 to 4	0		0 to 1	13	3 to 4	0
Germ #	GSC #	CC #			Germ #	GSC #	CC #			Germ #	GSC #	CC #			Germ #	GSC #	CC #			Germ #	GSC #	CC #			Germ #	GSC #	CC #
1	2	8			1	2	6			1	3	8			1	2	7			1	2	8			1	2	10
2	2	8			2	2	6			2	3	10			2	3	12			2	3	7			2	3	7
3	2	7			3	3	9			3	3	8			3	3	9			3	3	9			3	3	8
4	3	9			4	2	7			4	3	8			4	3	9			4	3	9			4	2	8
5	3	8			5	3	9			5	3	9			5	3	9			5	3	8			5	2	8
6	2	6			6	3	10			6	3	9			6	3	7			6	1	7			6	3	11
7	2	7			7	3	9			7	2	9			7	3	9			7	2	7			7	3	10
8	3	10			8	2	7			8	3	7			8	3	9			8	2	8			8	3	8
9	2	8			9	3	9			9	2	6			9	3	8			9	1	7			9	2	7
10	2	6			10	2	8			10	3	8			10	2	7			10	1	7			10	2	6
11	3	9			11	2	7			11	2	9			11	2	9			11	2	7			11	3	8
12	3	8			12	2	8			12	2	9			12	3	9			12	3	8			12	2	7
13	3	8			13	2	7			13	3	8			13	3	7			13	3	8			13	3	10
14	2	7			14	2	6			14	3	9			14	3	9			14	2	6			14	3	7
15	3	7			15	2	8			15	2	7			15	2	7			15	2	7			15	3	10
16	2	8			16	2	6			16	3	9			16	3	9			16	2	5			16	2	8
17	3	10			17	2	8			17	3	8			17	3	9			17	3	7			17	3	8
18	2	7			18	1	7			18	2	8			18	2	8			18	2	6			18	2	6
19	2	8			19	2	6			19	2	7			19	2	7			19	1	6			19	2	7
20	3	8			20	3	8			20	3	7			20	3	8			20	3	8			20	3	9
21	2	7			21	2	6			21	3	8			21	4	11			21	3	7			21	2	8
22	3	7			22	2	7			22	2	6			22	2	8			22	3	7			22	3	7
23	3	7			23	3	7			23	3	8			23	3	9			23	3	9			23	2	7
24	2	8			24	3	8			24	3	9			24	2	8			24	2	6			24	2	6
25	3	8			25	1	8			25	2	8			25	3	7			25	2	7			25	3	8
26	2	9			26	3	8			26	3	7			26	3	6			26	3	9			26	2	7
27	2	7			27	3	6			27	3	11			27	3	7			27	2	8			27	2	8
28	2	7			28	3	7			28	2	8			28	2	8			28	2	8			28	2	7
29	2	8			29	2	6			29	3	8			29	2	8			29	3	11			29	3	9
30	3	10			30	3	9			30	3	7			30	3	9			30	2	6			30	2	8
31	2	9			31	2	7			31	2	7			31	3	8			31	2	5			31	2	9
32	2	7			32	3	8			32	3	7			32	2	6			32	3	8			32	2	8
33	2	8			33	3	7			33	3	8			33	3	9			33	3	9			33	3	9
34	2	6			34	1	7			34	2	8			34	3	10			34	3	9			34	3	8
35	2	6			35	2	9			35	3	8			35	2	7			35	3	8			35	2	8
36	3	8			36	1	6			36	3	9			36	3	8			36	1	7			36	3	7
37	2	7			37	3	9			37	2	7			37	2	8			37	2	6			37	2	9
38	3	7			38	1	8			38	3	9			38	2	8			38	3	7			38	3	9
39	3	8			39	2	9			39	3	7			39	2	7			39	2	8			39	3	8
40	3	7			40	2	6			40	2	7			40	3	9			40	2	7			40	2	7
41	3	9			41	2	6			41	3	7			41	3	10			41	3	9			41	2	9
42	3	8			42	2	8			42	2	8			42	3	8			42	2	6			42	3	7
43	2	8			43	2	7			43	3	10			43	3	9			43	2	9			43	3	7
44	3	9			44	2	8			44	3	8			44	2	8			44	3	9			44	2	8
45	2	7			45	2	8			45	2	10			45	3	9			45	3	9			45	3	8
46	2	8			46	2	7			46	4	11			46	3	9			46	2	8			46	3	8
47	2	7			47	3	9			47	2	9			47	2	8			47	2	9			47	3	7
48	2	7			48	2	6			48	3	7			48	2	8			48	3	8			48	2	6
49	3	9			49	2	7			49	2	7			49	3	9			49	3	8			49	3	8
50	3	8			50	3	8			50	3	8			50	3	9			50	2	8			50	3	9
51	2	8			51	2	7			51	3	10			51	3	11			51	2	7			51	3	10
52	2	7			52	3	7			52	3	8			52	3	9			52	2	8			52	2	7
53	2	7			53	1	6			53	2	8			53	3	8			53	2	7			53	1	6
54	3	9			54	2	7			54	2	8			54	2	7			54	3	9			54	2	7
55	3	7			55	3	7			55	2	9			55	3	9			55	3	9			55	2	9
56	3	8			56	3	9			56	3	10			56	3	9			56	3	8			56	2	9
57	3	9			57	2	7			57	3	9			57	3	7			57	2	7			57	2	8
58	2	7			58	3	8			58	2	10			58	3	7			58	3	11			58	2	6
59	3	8			59	3	8			59	3	9			59	2	6			59	2	7			59	1	6
60	2	6			60	3	8			60	4	10			60	3	8			60	3	7			60	2	9
61	3	8			61	3	8			61	3	9			61	3	10			61	2	9			61	2	7
62	3	7			62	3	9			62	3	9			62	3	8			62	2	7			62	1	5
63	2	7			63	2	6			63	3	8			63	4	8			63	3	8			63	1	9
64	2	6			64	3	10			64	2	8			64	3	7			64	3	9			64	2	7
65	2	8			65	3	8			65	2	7			65	3	8			65	3	8			65	1	7
66	2	7			66	2	8			66	3	9			66	2	7			66	3	10			66	2	8
67	3	8			67	2	7			67	2	8			67	2	9			67	3	9			67	2	7
68	2	7			68	3	9			68	2	6			68	3	10			68	3	8			68	2	8
69	3	9			69	3	7			69	3	8			69	2	7			69	1	7			69	1	6
70	3	10			70	3	9			70	3	9			70	3	7			70	3	10			70	2	8
71	2	7			71	2	7			71	2	8			71	3	7			71	2	9			71	1	6
72	3	7			72	2	6			72	2	7			72	2	9			72	2	7			72	2	7
73	2	7			73	3	6			73	3	7			73	2	8			73	2	8			73	1	6
74	2	6			74	2	7			74	3	7			74	3	8			74	2	9			74	2	10
75	2	6			75	3	11			75	3	9			75	2	7			75	3	10			75	2	6
76	2	7			76	2	5			76	2	6			76	2	8			76	2	9			76	2	7
77	2	6			77	3	9			77	3	7			77	2	7			77	2	7			77	3	8
78	3	10			78	3	7			78	2	7			78	3	9			78	2	7			78	1	7
79	3	8			79	2	8			79	2	8			79	3	10			79	2	8			79	2	9
80	3	7			80	2	7			80	2	9			80	2	7			80	3	8			80	2	9
81	2	7			81	1	5			81	3	8			81	2	9			81	2	7			81	2	7
82	3	8			82	3	7			82	2	8			82	2	6			82	1	6			82	1	6
83	3	7			83	2	9			83	2	8			83	3	7			83	1	9			83	3	9
84	2	9			84	2	7			84	2	7			84	3	8			84	2	7			84	2	6
85	2	7			85	3	6			85	3	7			85	3	8			85	3	8			85	2	6
86	2	8			86	3	8			86	2	7			86	3	7			86	2	7			86	2	7
87	2	8			87	2	7			87	2	9			87	4	10			87	2	8			87	2	8
88	3	7			88	2	9			88	3	7			88	3	9			88	3	9			88	1	7
89	3	7			89	3	7			89	3	10			89	2	9			89	2	7			89	1	6
90	2	6			90	2	7			90	4	8			90	3	9			90	3	11			90	3	9
91	3	7			91	3	8			91	3	10			91	3	7			91	2	9			91	3	9
92	3	9			92	2	7			92	3	9			92	2	10			92	3	8			92	2	6
93	2	6			93	2	7			93	3	8			93	2	8			93	3	9			93	2	9
94	3	7			94	3	7			94	2	7			94	3	9			94	1	6			94	3	7
95	3	7			95	3	7			95	2	10			95	3	8			95	3	9			95	2	6
96	2	7			96	3	7			96	3	8			96	2	9			96	2	7			96	1	7
97	3	8			97	3	7			97	2	9			97	3	7			97	2	8			97	3	8
98	3	8			98	3	8			98	2	7			98	3	7			98	2	5			98	2	5
99	2	6			99	2	7			99	3	9			99	2	7			99	1	8			99	2	7
100	3	9			100	2	9			100	3	8			100	2	9			100	2	9			100	3	8

[truncated: 4 more sheets: 2022_1017, 10d, 2022_1022, 15d, All Data - GSC, All Data - CC]
