# Supplementary material for: Auxin exposure disrupts feeding behavior and fatty acid metabolism in adult Drosophila
Source: eLife. 2024 Jan 19;12:RP91953. doi: 10.7554/eLife.91953 (PMC10945601; doi:10.7554/eLife.91953)
Supplement: Figure 4—source data 2. [file elife-91953-fig4-data2.xlsx]

## Sheet: Sheet1
VK00040
	0 mM	10 mM
N1	7	11
N2	19	22
N3	8	12
Average	11.3333	15
Std. Dev.	6.65833	6.08276
Std. Error	3.84419	3.51188
