# Supplementary material for: Auxin exposure disrupts feeding behavior and fatty acid metabolism in adult Drosophila
Source: eLife. 2024 Jan 19;12:RP91953. doi: 10.7554/eLife.91953 (PMC10945601; doi:10.7554/eLife.91953)
Supplement: Figure 4—source data 3. [file elife-91953-fig4-data3.xlsx]

## Sheet: Sheet1
AGES
	0 mM	10 mM
N1	24	23
N2	19	19
N3	17	14
Average	20	18.6667
Std. Dev.	3.60555	4.50925
Std. Error	2.08167	2.60342
