# Supplementary material for: Auxin exposure disrupts feeding behavior and fatty acid metabolism in adult Drosophila
Source: eLife. 2024 Jan 19;12:RP91953. doi: 10.7554/eLife.91953 (PMC10945601; doi:10.7554/eLife.91953)
Supplement: Figure 4—source data 4. [file elife-91953-fig4-data4.xlsx]

## Sheet: Sheet1
VK00040
	0 mM	10 mM
N1	6	11
N2	6	3
N3	15	18
Average	9	10.6667
Std. Dev.	5.19615	7.50555
Std. Error	3	4.33333
