# Supplementary material for: Auxin exposure disrupts feeding behavior and fatty acid metabolism in adult Drosophila
Source: eLife. 2024 Jan 19;12:RP91953. doi: 10.7554/eLife.91953 (PMC10945601; doi:10.7554/eLife.91953)
Supplement: Figure 4—source data 5. [file elife-91953-fig4-data5.xlsx]

## Sheet: Sheet1
AGES
	0 mM	10 mM
N1	33	9
N2	1	0
N3	19	8
Average	17.6667	5.66667
Std. Dev.	16.0416	4.93288
Std. Error	9.26163	2.848
